# Supplementary material for: Proteome Dynamics of Persulfidation in Leaf Tissue under Light/Dark Conditions and Carbon Deprivation
Source: Antioxidants (Basel). 2023 Mar 23;12(4):789. doi: 10.3390/antiox12040789 (PMC10135009; doi:10.3390/antiox12040789)
Supplement: Supplementary file 1 [file antioxidants-12-00789-s001.zip]

Archive with 17 entries (17 files):
- Dataset S1.xlsx
- Dataset S10.xlsx
- Dataset S11.xlsx
- Dataset S2.xlsx
- Dataset S3.xlsx
- Dataset S4.xlsx
- Dataset S5.xlsx
- Dataset S6.xlsx
- Dataset S7.xlsx
- Dataset S8.xlsx
- Dataset S9.xlsx
- Figure S1.jpg
- Figure S2.jpg
- Figure S3.jpg
- Table S1.pdf
- Table S2.pdf
- Table S3.pdf
