# Supplementary material for: Proteome Dynamics of Persulfidation in Leaf Tissue under Light/Dark Conditions and Carbon Deprivation
Source: Antioxidants (Basel). 2023 Mar 23;12(4):789. doi: 10.3390/antiox12040789 (PMC10135009; doi:10.3390/antiox12040789)
Supplement: Supplementary file 1 [file antioxidants-12-00789-s001.zip › Dataset S1.xlsx]

## Sheet: S1_EN_2 REPLICAS
Dataset 1. Identified proteins in the sample set 1 (S1) in at least two independent replicas
LFQ intensity S11	LFQ intensity S12	LFQ intensity S13	LFQ intensity S14	Gene ontology (biological process)	Gene ontology (cellular component)	Gene ontology (molecular function)	Peptides	Q-value	Score	Intensity	MS/MS count	Sequence coverage S11 [%]	Sequence coverage S12 [%]	Sequence coverage S13 [%]	Sequence coverage S14 [%]	Protein IDs	Majority protein IDs	id	Gene name	Protein name
#!{Type}E	E	E	E	C	C	C	N	N	N	N	N	N	N	N	N	T	T	T	T	T
#!{C:Group1}LFQ intensity S1	LFQ intensity S1	LFQ intensity S1	LFQ intensity S1
289991912841797	293077812194824	298252029418945	28695743560791	photosynthesis [GO:0015979]	extrinsic component of membrane [GO:0019898];photosystem II oxygen evolving complex [GO:0009654]	calcium ion binding [GO:0005509]	17	0	66.223	9319100000	100	33.7	39	34.9	34.9	A0A178U9N5	A0A178U9N5	1	PPD5	PsbP domain protein (Mog1/PsbP/DUF1795-like photosystem II reaction center PsbP family protein)
267961254119873	265499973297119	26707145690918	271397533416748	cell wall modification [GO:0042545];pectin catabolic process [GO:0045490]		aspartyl esterase activity [GO:0045330];enzyme inhibitor activity [GO:0004857];pectinesterase activity [GO:0030599]	9	0	106.78	3628000000	60	9.9	8	12.8	9	A0A178UA07	A0A178UA07	2	At5g09760	Plant invertase/pectin methylesterase inhibitor superfamily
258776912689209	263190517425537	264212245941162	252671375274658				9	0	31.697	2579000000	50	41	49.7	39.3	30.6	A0A178UE66	A0A178UE66	3	PBS2	Cysteine and histidine-rich domain-containing protein RAR1
20701171875	215358772277832	220604553222656	212589683532715		cytosol [GO:0005829]	5-diphosphoinositol pentakisphosphate 3-kinase activity [GO:0102092];ATP binding [GO:0005524];diphosphoinositol-pentakisphosphate kinase activity [GO:0033857];inositol heptakisphosphate kinase activity [GO:0000829];inositol hexakisphosphate 1-kinase activity [GO:0052723];inositol hexakisphosphate 3-kinase activity [GO:0052724];inositol hexakisphosphate 5-kinase activity [GO:0000832]	38	0	74.976	8110800000	143	1.3	2.4	2	2.1	A0A178VEL3	A0A178VEL3	5	AtVIP1	Inositol hexakisphosphate and diphosphoinositol-pentakisphosphate kinase
224751148223877	243413677215576	24301872253418	245482196807861			FMN binding [GO:0010181];oxidoreductase activity [GO:0016491]	4	0.0086572	1.5291	375120000	6	3.2	13	9.7	3.6	A0A178VMD8	A0A178VMD8	6	HAOX2	Aldolase-type TIM barrel family protein
24683406829834	249840717315674	NaN	249289054870605			UDP-glycosyltransferase activity [GO:0008194]	3	0	3.7199	448220000	11	5.3	7	0	3.3	A0A178VRK6	A0A178VRK6	8	At2g30150	UDP-Glycosyltransferase superfamily protein
26191349029541	254817924499512	255924911499023	256354713439941	protein initiator methionine removal [GO:0070084]	cytoplasm [GO:0005737]	metal ion binding [GO:0046872];metalloaminopeptidase activity [GO:0070006]	9	0	4.8987	790170000	9	23.1	19	14.3	23.1	A0A178VUM7	A0A178VUM7	9	MAP2A	Methionine aminopeptidase 2
258357639312744	256959095001221	259116401672363	259882164001465	RNA metabolic process [GO:0016070]		RNA binding [GO:0003723];sequence-specific DNA binding [GO:0043565];single-stranded DNA binding [GO:0003697]	9	0	14.904	2149800000	60	13.6	10.4	10	18.8	A0A178W0K0	A0A178W0K0	13	At2g37020	Translin family protein
263442153930664	26385892868042	260904712677002	268634872436523		small-subunit processome [GO:0032040]		5	0.0013038	2.3067	1641800000	4	1.1	1.1	1.1	0.9	A0A178W3G2	A0A178W3G2	14	At1g69070	Nucleolar-like protein
240160579681396	224305095672607	233222370147705	242560920715332				14	0	60.791	3058100000	61	12.4	1.8	6.6	10	A0A1I9LLC0	A0A1I9LLC0	17	CID4	CTC-interacting domain 4
232222576141357	237115631103516	245410289764404	240937786102295	microtubule nucleation [GO:0007020]	cytoplasm [GO:0005737];microtubule [GO:0005874];microtubule organizing center [GO:0005815];spindle pole [GO:0000922]	gamma-tubulin binding [GO:0043015]	3	0.0033021	2.0431	448050000	12	2.6	1.1	2.7	1.1	A0A1I9LLT8	A0A1I9LLT8	20	GCP4	Gamma-tubulin complex component
263643779754639	267276725769043	267141075134277	269879360198975			aspartic-type endopeptidase activity [GO:0004190]	7	0	26.925	2923500000	74	3.7	6.8	3.7	3.7	A0A1I9LM46	A0A1I9LM46	22	At3g51330	Eukaryotic aspartyl protease family protein
308910636901855	298144264221191	310153141021729	308208446502686	carbohydrate metabolic process [GO:0005975]	integral component of membrane [GO:0016021]	beta-galactosidase activity [GO:0004565]	39	0	279.18	19124000000	242	39.7	36.4	42.4	41.1	A0A1I9LM56	A0A1I9LM56	23	BGAL2	Beta-galactosidase
290042095184326	290174121856689	289438571929932	290133972167969			RNA binding [GO:0003723]	21	0	120.53	15150000000	294	25	26.2	23	24.1	A0A1I9LM90	A0A1I9LM90	25	FLK	RNA-binding KH domain-containing protein
246509704589844	246964664459229	NaN	230489807128906	phloem development [GO:0010088]			6	0	11.152	511900000	14	1.5	1.5	0	1.5	A0A1I9LMF2	A0A1I9LMF2	27	SEOa	Sieve element occlusion protein
247566928863525	241885032653809	NaN	242768936157227		integral component of membrane [GO:0016021]		1	0.00094429	2.5477	222190000	2	20.8	20.8	0	20.8	A0A1I9LMI8	A0A1I9LMI8	29	At3g23450	Transmembrane protein
249464149475098	250693588256836	253354148864746	253188629150391	autophagy [GO:0006914];protein transport [GO:0015031]	cytoplasm [GO:0005737]	cysteine-type peptidase activity [GO:0008234]	10	0	60.132	1595700000	50	9.5	7.7	14.6	10.5	A0A1I9LMQ9	A0A1I9LMQ9	32	At3g59950	Cysteine protease
263240413665771	263754730224609	262334117889404	267434253692627	de-etiolation [GO:0009704];response to far red light [GO:0010218];seed germination [GO:0009845]	integral component of membrane [GO:0016021];perinuclear region of cytoplasm [GO:0048471]	hydrolase activity, acting on carbon-nitrogen (but not peptide) bonds [GO:0016810]	3	0.0054093	1.7957	724430000	5	4.8	7.5	7.5	2.4	A0A1I9LN01	A0A1I9LN01	33	LAF3	Protein LONG AFTER FAR-RED 3
284824695587158	28004638671875	285976867675781	309485168457031			RNA binding [GO:0003723]	11	0	34.628	14083000000	54	20.8	19.3	13.9	18.1	A0A1I9LN63	A0A1I9LN63	34	At3g16230	Putative eukaryotic LigT
NaN	232351150512695	NaN	233889007568359	metal ion transport [GO:0030001]		metal ion binding [GO:0046872]	28	0	3.8927	183870000	12	85.6	92.8	85.6	92.8	A0A1I9LNC0	A0A1I9LNC0	37	CCH	Copper chaperone
287356033325195	288238372802734	290821781158447	288815402984619				15	0	80.458	9624400000	134	45.1	39.7	41.2	43	A0A1I9LNQ7	A0A1I9LNQ7	38	At3g02510	Regulator of chromosome condensation (RCC1) family protein
287990627288818	288837566375732	289258079528809	288782997131348				20	0	131.46	14615000000	240	46.8	48.6	43.7	30	A0A1I9LNT2	A0A1I9LNT2	39	SDR1	NAD(P)-binding Rossmann-fold superfamily protein
300380001068115	300863857269287	300763549804688	300030307769775				8	0	62.724	14111000000	165	34.4	34.4	34.4	34.4	A0A1I9LNZ1	A0A1I9LNZ1	40	At3g07470	Uncharacterized protein
334491157531738	335196990966797	334556198120117	33478099822998				22	0	43.56	156960000000	43	0.5	0.5	0.5	1	A0A1I9LP28	A0A1I9LP28	41	At3g06530	ARM repeat superfamily protein
279750881195068	280883083343506	280749015808105	281692562103271	calcium-mediated signaling [GO:0019722]		calcium ion binding [GO:0005509]	8	0	76.319	4104800000	90	33.6	35.5	35.5	35.5	A0A1I9LPJ2	A0A1I9LPJ2	42	CAM7	Calmodulin
246483955383301	247668361663818	244482135772705	25227180480957				10	0	12.992	1410800000	13	3.3	1.5	1.5	1.5	A0A1I9LPW3	A0A1I9LPW3	44	At3g04490	Exportin-4 protein
267229919433594	260676574707031	267475280761719	264727573394775				27	0	159.12	3915100000	85	1.1	2.1	2.1	1.1	A0A1I9LPZ1	A0A1I9LPZ1	45	At3g50370	Uncharacterized protein
213708190917969	219873542785645	220271549224854	22215934753418			serine-type endopeptidase activity [GO:0004252]	45	0	291.84	17539000000	257	1.1	2.2	1.1	4.4	A0A1I9LPZ9	A0A1I9LPZ9	47	DEG7	DegP protease 7
NaN	327631530761719	325620422363281	326750144958496	cellular response to DNA damage stimulus [GO:0006974]		ATP binding [GO:0005524];protein serine/threonine kinase activity [GO:0004674]	6	0	3.4473	72258000000	5	0.7	2.3	1.6	1.6	A0A1I9LQ79	A0A1I9LQ79	49	ATM	Serine/Threonine-kinase ATM-like protein
373262138366699	373300628662109	378569488525391	372004928588867	carbon utilization [GO:0015976]		carbonate dehydratase activity [GO:0004089];zinc ion binding [GO:0008270]	58	0	323.31	2094100000000	2321	99.6	99.6	99.6	99.6	A0A1I9LQB3	A0A1I9LQB3	50	CA1	Carbonic anhydrase
276445083618164	287433605194092	295362148284912	302744216918945			ATP binding [GO:0005524];helicase activity [GO:0004386]	4	0	3.2308	6384200000	58	1.7	1.6	2.1	2.1	A0A1I9LQH7	A0A1I9LQH7	52	PIE1	SNF2 domain-containing protein / helicase domain-containing protein
248351364135742	246329517364502	247859630584717	246694183349609				5	0	4.1228	1020800000	19	10	11.3	5.9	5.4	A0A1I9LQU5	A0A1I9LQU5	56	FIB4	Plastid-lipid associated protein PAP / fibrillin family protein
NaN	221968555450439	222866973876953	NaN				26	0	323.31	45794000000	208	0	5.3	5.3	0	A0A1I9LRA3	A0A1I9LRA3	59	At3g20370	TRAF-like family protein
237248401641846	237491912841797	NaN	NaN	cellular protein modification process [GO:0006464];protein transport [GO:0015031]			2	0	5.0997	252810000	8	5.1	5.1	0	0	A0A1I9LRG2	A0A1I9LRG2	60	ELC	Ubiquitin-conjugating enzyme/RWD-like protein
281245021820068	280097732543945	278068580627441	278745517730713			peptidyl-prolyl cis-trans isomerase activity [GO:0003755]	9	0	24.962	2493200000	51	31	22.1	31	33.9	A0A1I9LRJ6	A0A1I9LRJ6	61	At3g60370	Peptidylprolyl isomerase
254825305938721	257818927764893	256972618103027	260418701171875	cell wall modification [GO:0042545];pectin catabolic process [GO:0045490]	integral component of membrane [GO:0016021]	aspartyl esterase activity [GO:0045330];enzyme inhibitor activity [GO:0004857];pectinesterase activity [GO:0030599]	3	0	5.0873	1739700000	13	3.9	3.9	3.9	3.9	A0A1I9LRM8	A0A1I9LRM8	62	At3g49220	Pectinesterase
2501881980896	259978523254395	252195587158203	256299266815186	nuclear export [GO:0051168]	nucleus [GO:0005634]		14	0	18.154	1678900000	62	0.5	1.5	0.5	0.5	A0A1I9LRW7	A0A1I9LRW7	63	HST	ARM repeat superfamily protein
252564144134521	249953308105469	NaN	259277534484863	NAD metabolic process [GO:0019674];NADP biosynthetic process [GO:0006741]	integral component of membrane [GO:0016021]	NAD+ kinase activity [GO:0003951]	12	0	18.96	1829700000	34	2	2	0	1.2	A0A1I9LRY1	A0A1I9LRY1	64	NADK1	NAD kinase 1
224549808502197	220844974517822	NaN	232059345245361			nucleic acid binding [GO:0003676]	11	0	38.539	2634200000	49	6.2	2.2	0	3.9	A0A1I9LSC2	A0A1I9LSC2	66	At3g07030	Alba DNA/RNA-binding protein
237398509979248	220998573303223	23504337310791	264063453674316			zinc ion binding [GO:0008270]	143	0	323.31	29759000000	593	0.9	0.7	1	1.5	A0A1I9LSK3	A0A1I9LSK3	67	BIG	Auxin transport protein (BIG)
308154335021973	308216800689697	308690891265869	306921215057373		extracellular region [GO:0005576]		21	0	172.86	15715000000	191	77.3	73.1	77.3	61.3	A0A1I9LT21	A0A1I9LT21	70	EXLA1	Expansin-like A1
264010810852051	265220813751221	269176387786865	267382793426514				10	0	7.6887	1573300000	44	6.9	9.2	9.6	9.9	A0A1I9LT48	A0A1I9LT48	72	CHUP1	Hydroxyproline-rich glycoprotein family protein
24771276473999	247878570556641	243435363769531	241514339447021			ligase activity [GO:0016874]	2	0	3.5848	547170000	7	3.4	3.4	3.4	7.1	A0A1I9LTH3	A0A1I9LTH3	75	At3g10250	Histidine-tRNA ligase
27492130279541	278063049316406	279420127868652	281489448547363	metabolic process [GO:0008152]	membrane [GO:0016020]	calcium ion binding [GO:0005509];mannosyl-oligosaccharide 1,2-alpha-mannosidase activity [GO:0004571]	12	0	40.694	3616200000	93	17.5	18.8	12.3	15.5	A0A1P8AM79	A0A1P8AM79	78	MNS3	alpha-1,2-Mannosidase
282000865936279	287356986999512	280354328155518	281210479736328	protein retention in Golgi apparatus [GO:0045053];protein targeting to vacuole [GO:0006623]	extrinsic component of membrane [GO:0019898]		6	0	4.3005	14083000000	33	0.7	0.7	0.7	0.7	A0A1P8AMQ1	A0A1P8AMQ1	79	At1g48090	Calcium-dependent lipid-binding family protein
298695755004883	301220111846924	297628288269043	296461925506592		integral component of membrane [GO:0016021]	oxidoreductase activity, acting on the aldehyde or oxo group of donors, disulfide as acceptor [GO:0016624]	20	0	194.94	3441100000	58	42.7	40.1	35.5	35.7	A0A1P8AMS1	A0A1P8AMS1	80	At1g21400	Thiamin diphosphate-binding fold (THDP-binding) superfamily protein
NaN	243705940246582	245658130645752	247398509979248	protein transport [GO:0015031]			2	0.00019257	2.8778	493840000	2	0	11.1	7.1	7.1	A0A1P8ANA1	A0A1P8ANA1	83	At1g25420	Regulator of Vps4 activity in the MVB pathway protein
267731647491455	270690727233887	26730525970459	269819622039795				8	0	5.5928	3777900000	39	9.3	5.9	6.6	12	A0A1P8ANB4	A0A1P8ANB4	84	SKIP16	SKP1/ASK-interacting protein 16
26505428314209	258988990783691	264261608123779	26491641998291	plant-type cell wall organization [GO:0009664]	cell wall [GO:0005618];extracellular region [GO:0005576];membrane [GO:0016020]		5	0	14.659	1344700000	32	10.9	15	14.5	20.2	A0A1P8APG3	A0A1P8APG3	87	EXPA11	Expansin
308411617279053	307687225341797	307554931640625	30825174331665		extracellular space [GO:0005615]		36	0	323.31	45969000000	524	54.5	54.3	54.5	43.3	A0A1P8API2	A0A1P8API2	89	SERPIN1	Serine protease inhibitor (SERPIN) family protein
238220157623291	NaN	242091064453125	238136253356934				5	0	6.4111	281920000	5	3.3	2.5	3	6.3	A0A1P8APQ0	A0A1P8APQ0	90	CW7	CW7
335106506347656	341233978271484	335762138366699	335221557617188	glucose metabolic process [GO:0006006]	integral component of membrane [GO:0016021]	NAD binding [GO:0051287];NADP binding [GO:0050661];oxidoreductase activity, acting on the aldehyde or oxo group of donors, NAD or NADP as acceptor [GO:0016620]	59	0	323.31	211200000000	584	74.4	73.9	74.4	74.4	A0A1P8APR6	A0A1P8APR6	91	GAPA-2	Glyceraldehyde-3-phosphate dehydrogenase
NaN	261908779144287	255571613311768	258723926544189	protein transport [GO:0015031]	integral component of Golgi membrane [GO:0030173]		2	0.0032961	2.0256	322060000	4	0	11.8	19.4	11.8	A0A1P8APW7	A0A1P8APW7	94	At1g29060	Target SNARE coiled-coil domain protein
243530616760254	243950595855713	246502590179443	247885036468506			acyl-CoA hydrolase activity [GO:0047617]	5	0	4.3916	1072700000	38	13.4	13.4	7.1	7.1	A0A1P8APX5	A0A1P8APX5	96	At1g04290	Thioesterase superfamily protein
253280029296875	249176616668701	245274295806885	246619911193848	regulation of transcription, DNA-templated [GO:0006355]		transcription coregulator activity [GO:0003712]	4	0.0032919	2.0073	662010000	15	0.9	0.9	0.9	0.9	A0A1P8AQ03;REV__Q7XJE6	A0A1P8AQ03	98	NRB4	Mediator of RNA polymerase II transcription subunit 15a-like protein
238162651062012	239688625335693	234413909912109	250682926177979			calcium ion binding [GO:0005509]	35	0	211.45	10796000000	151	2.1	2.3	2.7	5.4	A0A1P8AQ08	A0A1P8AQ08	99	At1g21630	Calcium-binding EF hand family protein
252992534637451	239262390136719	255134010314941	252146015167236				3	0	38.687	482880000	23	7	3.4	7.4	10.8	A0A1P8AQ22	A0A1P8AQ22	100	VAD1	GRAM domain family protein
274171562194824	272902641296387	273059120178223	273552303314209	NAD metabolic process [GO:0019674];NADP biosynthetic process [GO:0006741]		NAD+ kinase activity [GO:0003951]	9	0	22.982	2674900000	105	28.1	22.2	28.1	22.2	A0A1P8AQ52	A0A1P8AQ52	101	NADK3	NAD(H) kinase 3
255947132110596	257833919525146	260826759338379	260175876617432	mRNA processing [GO:0006397]	nucleus [GO:0005634]	5'-3' exoribonuclease activity [GO:0004534];nucleic acid binding [GO:0003676];zinc ion binding [GO:0008270]	17	0	59.782	3515500000	78	7.8	6.7	7.3	5.2	A0A1P8AQR8	A0A1P8AQR8	103	XRN4	5'-3' exoribonuclease
287163677215576	289236850738525	283873882293701	285246601104736			ADP binding [GO:0043531]	3	0.0060987	1.7106	7479200000	45	2.1	2.1	2.1	2.1	A0A1P8AQY6	A0A1P8AQY6	104	RFL1	RPS5-like 1
264805755615234	2685910987854	261656875610352	239400196075439				20	0	51.871	3477000000	57	3.1	1.4	3.1	3.1	A0A1P8AQY7	A0A1P8AQY7	105	GC5	Golgin Putative 5
221792221069336	220871238708496	NaN	NaN			metal ion binding [GO:0046872]	1	0	4.2289	253050000	3	4.5	4.5	0	0	A0A1P8AQZ1	A0A1P8AQZ1	106	CPSF30	Cleavage and polyadenylation specificity factor 30
NaN	238852062225342	NaN	236703357696533	biosynthetic process [GO:0009058]		catalytic activity [GO:0003824]	2	0	4.3897	205490000	9	0	4.1	3.5	4.1	A0A1P8ARL5	A0A1P8ARL5	111	At1g03210	Phenazine biosynthesis PhzC/PhzF protein
23069055557251	230204563140869	232834796905518	230130958557129			metal ion binding [GO:0046872]	2	0.0052337	1.8084	216130000	2	5.7	5.7	5.7	5.7	A0A1P8ARX2	A0A1P8ARX2	113	TAF15	TBP-associated factor 15
NaN	NaN	241368827819824	23422908782959	DNA recombination [GO:0006310];double-strand break repair via nonhomologous end joining [GO:0006303];telomere maintenance [GO:0000723]	Ku70:Ku80 complex [GO:0043564]	ATP binding [GO:0005524];damaged DNA binding [GO:0003684];DNA helicase activity [GO:0003678];telomeric DNA binding [GO:0042162]	9	0	38.351	1260500000	37	0	0	4.7	2.9	A0A1P8ASX4	A0A1P8ASX4	116	KU80	ATP-dependent DNA helicase 2 subunit KU80
NaN	266641082763672	272957038879395	265678024291992				16	0	12.797	2740500000	38	0	0.5	0.5	0.2	A0A1P8AT16	A0A1P8AT16	117	SPI	BEACH-DOMAIN HOMOLOG A1
NaN	252177848815918	246217613220215	248425884246826	regulation of translational initiation [GO:0006446];translational initiation [GO:0006413]	eukaryotic translation initiation factor 2B complex [GO:0005851]	translation initiation factor activity [GO:0003743]	4	0	4.2758	698550000	15	0	2	2	2	A0A1P8AT59	A0A1P8AT59	118	At1g53900	Eukaryotic translation initiation factor 2B (eIF-2B) family protein
222579040527344	243723888397217	235896663665771	230231666564941	positive regulation of kinase activity [GO:0033674];regulation of translation [GO:0006417]		protein kinase binding [GO:0019901];protein kinase regulator activity [GO:0019887];ribosome binding [GO:0043022]	105	0	323.31	28884000000	475	0.9	1	0.9	0.7	A0A1P8AT97	A0A1P8AT97	119	ILA	ILITYHIA
286269702911377	285525951385498	NaN	283491687774658	microtubule-based movement [GO:0007018]		ATP binding [GO:0005524];microtubule binding [GO:0008017];microtubule motor activity [GO:0003777]	6	0	6.1011	6502300000	19	0.9	0.9	0	0.9	A0A1P8ATA6	A0A1P8ATA6	120	At1g63640	p-loop nucleoside triphosphate hydrolases superfamily protein with CH (Calponin Homology) domain-containing protein
352953262329102	352447700500488	3528271484375	35020149230957	rRNA processing [GO:0006364]	cytosol [GO:0005829]	catalytic activity [GO:0003824];RNA binding [GO:0003723]	65	0	323.31	481470000000	1574	77	77	77	76	A0A1P8ATL2	A0A1P8ATL2	123	CRB	Chloroplast RNA binding protein
310007495880127	310604648590088	312069358825684	310097198486328		cytosol [GO:0005829]	serine-type endopeptidase activity [GO:0004252];serine-type exopeptidase activity [GO:0070008]	55	0	323.31	40724000000	695	60.6	54.4	55.7	49.4	A0A1P8ATN7	A0A1P8ATN7	124	At1g50380	Prolyl oligopeptidase family protein
271684436798096	27114559173584	273398551940918	27915189743042			RNA binding [GO:0003723]	9	0	27.628	2452800000	68	16	16	21.9	24.8	A0A1P8ATW8	A0A1P8ATW8	125	At1g53120	RNA-binding S4 domain-containing protein
271985416412354	282833919525146	282733764648438	286910915374756	retrograde transport, endosome to Golgi [GO:0042147]	cytosol [GO:0005829];GARP complex [GO:0000938]		30	0	127.39	9600200000	108	2.9	2.5	4.1	2.9	A0A1P8ATX5	A0A1P8ATX5	126	HIT1	Membrane trafficking VPS53 family protein
286016235351563	286642112731934	286743831634521	288453254699707			thiosulfate sulfurtransferase activity [GO:0004792]	18	0	118.19	11542000000	195	46.2	39.8	43.6	43.6	A0A1P8AU99	A0A1P8AU99	128	RDH2	Rhodanese homologue 2
245329093933105	24426176071167	242785263061523	250409297943115			GTP binding [GO:0005525];hydrolase activity [GO:0016787]	4	0.0031216	2.0528	183040000	8	10.3	8.2	7.7	8.2	A0A1P8AUC4	A0A1P8AUC4	129	AIG1	p-loop containing nucleoside triphosphate hydrolases superfamily protein
281121234893799	289845447540283	284450206756592	286988582611084				6	0	11.346	8144600000	35	1.3	1.3	1.3	1.3	A0A1P8AUF8	A0A1P8AUF8	131	At1g23180	ARM repeat superfamily protein
286445770263672	289210205078125	285790634155273	285961227416992	leucine biosynthetic process [GO:0009098]		3-isopropylmalate dehydrogenase activity [GO:0003862];magnesium ion binding [GO:0000287];NAD binding [GO:0051287]	31	0	145.97	5977900000	106	51.8	50.4	52	51.3	A0A1P8AUM8	A0A1P8AUM8	135	IMD3	3-isopropylmalate dehydrogenase
226661815643311	22576623916626	NaN	NaN				12	0	37.023	4771800000	23	0.9	0.9	0	0	A0A1P8AUP4	A0A1P8AUP4	136	At1g27430	GYF domain-containing protein
23767391204834	237838668823242	237402629852295	237619247436523	protein folding [GO:0006457]		ATP binding [GO:0005524]	2	0.003647	1.9513	357120000	6	8.5	8.5	8.5	8.5	A0A1P8AUX7	A0A1P8AUX7	138	CPN10	Chaperonin 10
273574142456055	272115039825439	NaN	272708835601807	abscisic acid-activated signaling pathway [GO:0009738];embryo sac development [GO:0009553];regulation of developmental growth [GO:0048638];ribosomal large subunit assembly [GO:0000027];ribosomal large subunit export from nucleus [GO:0000055];rRNA processing [GO:0006364]	chloroplast envelope [GO:0009941];cytoplasm [GO:0005737];nucleolus [GO:0005730];nucleoplasm [GO:0005654];nucleus [GO:0005634];plasmodesma [GO:0009506];preribosome, large subunit precursor [GO:0030687]	ATP binding [GO:0005524];ATPase activity [GO:0016887]	33	0	36.963	3358600000	69	0.2	0.2	0	0.2	A0A1P8AUY4	A0A1P8AUY4	139	MDN1	Midasin
262029571533203	269809818267822	NaN	273736820220947	nucleus organization [GO:0006997]	nucleus [GO:0005634]		2	0.0065989	1.6286	1451600000	12	1.9	1.9	0	1.1	A0A1P8AUZ9	A0A1P8AUZ9	140	LINC2	Nuclear matrix constituent protein-like protein
284349575042725	286495189666748	281453533172607	285763988494873	lipid metabolic process [GO:0006629]		aspartic-type endopeptidase activity [GO:0004190]	31	0	323.31	92566000000	428	29.4	32.3	22.4	21.9	A0A1P8AV08	A0A1P8AV08	141	APA1	Aspartic proteinase A1
259691047668457	259045829772949	258431396484375	261013927459717		ribosome [GO:0005840]	rRNA binding [GO:0019843];structural constituent of ribosome [GO:0003735];translation elongation factor activity [GO:0003746]	3	0	6.2972	853370000	11	13	13	7.4	13	A0A1P8AV66	A0A1P8AV66	142	At1g64510	Translation elongation factor EF1B/ribosomal protein S6 family protein
227840461730957	239557113647461	234939937591553	253308429718018	intracellular protein transport [GO:0006886];vesicle-mediated transport [GO:0016192]	COPI-coated vesicle membrane [GO:0030663];Golgi membrane [GO:0000139];membrane coat [GO:0030117]	structural molecule activity [GO:0005198]	58	0	323.31	43411000000	343	3.8	6.1	2.2	0.9	A0A1P8AV73	A0A1P8AV73	143	At1g52360	Coatomer subunit beta'
293935394287109	28805965423584	280951671600342	2838743019104	endonucleolytic cleavage of tricistronic rRNA transcript (SSU-rRNA, 5.8S rRNA, LSU-rRNA) [GO:0000479];maturation of SSU-rRNA from tricistronic rRNA transcript (SSU-rRNA, 5.8S rRNA, LSU-rRNA) [GO:0000462]	90S preribosome [GO:0030686];nucleus [GO:0005634]	GTP binding [GO:0005525];GTPase activity [GO:0003924];U3 snoRNA binding [GO:0034511]	7	0	4.122	12404000000	34	1.5	1.5	1.5	1.5	A0A1P8AVE9	A0A1P8AVE9	145	At1g06720	p-loop containing nucleoside triphosphate hydrolases superfamily protein
NaN	274210147857666	263569278717041	273912467956543		integral component of membrane [GO:0016021]	ATP binding [GO:0005524];protein kinase activity [GO:0004672]	14	0	54.865	2751900000	45	0	1.8	3.6	1.8	A0A1P8AVQ6	A0A1P8AVQ6	147	At1g51850	Leucine-rich repeat protein kinase family protein
258958740234375	260867919921875	262099628448486	264087600708008				7	0.0020348	2.1783	1585500000	9	2.1	2.1	2.1	2.1	A0A1P8AW11	A0A1P8AW11	149	ATG18H	Autophagy 18h-like protein
240135040283203	242965602874756	240291786193848	242744083404541	microtubule severing [GO:0051013]	cytoplasm [GO:0005737];katanin complex [GO:0008352];microtubule [GO:0005874]	microtubule binding [GO:0008017]	2	0.0022157	2.1462	380800000	6	1	1	1	1	A0A1P8AW69	A0A1P8AW69	151	At1g11160	Katanin p80 WD40 repeat-containing subunit B1 homolog
20660228729248	228872528076172	NaN	234893455505371				17	0	52.025	4359200000	64	1.9	3	0	3.4	A0A1P8AW83;Q9LDL7	A0A1P8AW83	152	SCL5	Scarecrow-like 5
263307228088379	263987998962402	NaN	NaN	phosphatidylinositol phosphorylation [GO:0046854];phosphatidylinositol-mediated signaling [GO:0048015]		kinase activity [GO:0016301]	25	0	61.416	3243900000	88	1.6	3	0	0	A0A1P8AWA3	A0A1P8AWA3	153	ATPI4K ALPHA	Phosphatidylinositol 3-and 4-kinase family protein
254926815032959	256893920898438	257213497161865	258767318725586		chloroplast [GO:0009507]	ATP binding [GO:0005524];hydrolase activity [GO:0016787]	7	0	4.8324	709950000	21	6	2.7	7.2	8.8	A0A1P8AWP1	A0A1P8AWP1	157	At1g73170	p-loop containing nucleoside triphosphate hydrolases superfamily protein
255328788757324	254676208496094	254102172851563	25095630645752				7	0	4.8432	644190000	8	11.5	7.6	17.4	20.1	A0A1P8AWP9	A0A1P8AWP9	158	At1g31500	DNAse I-like superfamily protein
256004810333252	257333221435547	255183029174805	255443630218506				5	0	8.1764	940570000	27	3.3	3.3	11.1	18.9	A0A1P8AWV1	A0A1P8AWV1	162	YUP8H12R.14	Nitrobindin heme-binding domain protein
332591209411621	333868942260742	334554977416992	333798141479492				48	0	323.31	154160000000	964	71	70	74.3	71.2	A0A1P8AWX3;O48705	A0A1P8AWX3	163	At1g33590	Leucine-rich repeat (LRR) family protein
264132232666016	261008129119873	260143146514893	259996376037598			sirohydrochlorin cobaltochelatase activity [GO:0016852]	5	0	16.361	975910000	28	10.6	27.3	36.1	27.3	A0A1P8AWY5	A0A1P8AWY5	164	SIRB	Sirohydrochlorin ferrochelatase B
275431098937988	274669990539551	277339553833008	27930778503418		chloroplast [GO:0009507]		6	0	23.932	2514600000	39	26.8	26.8	27.9	19	A0A1P8AX61	A0A1P8AX61	166	At2g01755	Uncharacterized protein
267591342926025	266647872924805	269908580780029	270507164001465	DNA repair [GO:0006281]		class I DNA-(apurinic or apyrimidinic site) endonuclease activity [GO:0140078];DNA binding [GO:0003677];endonuclease activity [GO:0004519];metal ion binding [GO:0046872]	5	0	8.3443	1593000000	33	3.6	4.9	5.7	5.7	A0A1P8AX84	A0A1P8AX84	167	ARP	DNA-(apurinic or apyrimidinic site) lyase
227778205871582	220602912902832	219797344207764	219120693206787	proteasome assembly [GO:0043248]		molecular adaptor activity [GO:0060090]	62	0	289.7	11901000000	243	1.1	1.6	1.5	1.5	A0A1P8AX98	A0A1P8AX98	168	At2g26780	ARM repeat superfamily protein
255062446594238	257640781402588	252625579833984	250767574310303				4	0.00038234	2.7554	571670000	17	5.7	5.7	9.1	6.1	A0A1P8AXA5	A0A1P8AXA5	169	MEE18	Maternal effect embryo arrest 18
251761131286621	240280838012695	246848526000977	NaN			ATP binding [GO:0005524];helicase activity [GO:0004386];nucleic acid binding [GO:0003676]	9	0	24.185	1394800000	57	3.2	1.1	1.2	0	A0A1P8AXM2	A0A1P8AXM2	170	At2g35920	RNA helicase family protein
291361885070801	291348438262939	290977821350098	291292037963867	NAD biosynthetic process [GO:0009435]		nicotinate phosphoribosyltransferase activity [GO:0004516];nicotinate-nucleotide diphosphorylase (carboxylating) activity [GO:0004514]	29	0	133.78	15659000000	285	36.8	31.4	41.7	34.9	A0A1P8AXW4	A0A1P8AXW4	172	NAPRT2	Nicotinate phosphoribosyltransferase
242584648132324	227252979278564	246330623626709	232410068511963	translation [GO:0006412]	ribosome [GO:0005840]	structural constituent of ribosome [GO:0003735]	38	0	263.13	62532000000	301	10.6	11.1	11.1	16.6	A0A1P8AY36	A0A1P8AY36	174	At2g34480	Ribosomal protein L18ae/LX family protein
231247253417969	235124378204346	238061695098877	237595901489258				3	0	3.2767	336010000	17	3.1	6.3	3.1	3.1	A0A1P8AY74	A0A1P8AY74	175	Basic Proline-rich Protein 1	Flocculation FLO11-like protein
276418933868408	27872615814209	280423908233643	289723510742188				12	0	62.508	7566700000	85	33.1	32.3	30.7	31.9	A0A1P8AYM6	A0A1P8AYM6	179	At2g29320	NAD(P)-binding Rossmann-fold superfamily protein
217304077148438	NaN	224595394134521	231893634796143	glutamate metabolic process [GO:0006536]		glutamate decarboxylase activity [GO:0004351];pyridoxal phosphate binding [GO:0030170]	17	0	7.7682	739440000	17	14.7	12.5	14.7	13.9	A0A1P8AZ64	A0A1P8AZ64	183	GAD4	Glutamate decarboxylase
315281314849854	317425422668457	315761451721191	316042594909668	protoporphyrinogen IX biosynthetic process [GO:0006782];uroporphyrinogen III biosynthetic process [GO:0006780]		uroporphyrinogen-III synthase activity [GO:0004852]	24	0	233.65	55491000000	251	52.8	52.8	52.8	52.5	A0A1P8AZK1	A0A1P8AZK1	185	HEMD	Uroporphyrinogen-III synthase
282088088989258	283385391235352	274853134155273	275401554107666		nucleus [GO:0005634]	DNA-binding transcription factor activity [GO:0003700];sequence-specific DNA binding [GO:0043565]	1	0.00038256	2.7661	4958500000	6	6	6	6	6	A0A1P8AZP8	A0A1P8AZP8	188	WRKY55	WRKY DNA-binding protein 55
NaN	228031959533691	227122993469238	250571365356445			hydrolase activity [GO:0016787]	4	0	19.434	374890000	10	0	3.5	3.5	2.3	A0A1P8AZZ0	A0A1P8AZZ0	190	At2g44970	Alpha/beta-Hydrolases superfamily protein
NaN	NaN	24271203994751	243724536895752	methylation [GO:0032259]		methyltransferase activity [GO:0008168]	3	0.0011261	2.4162	681620000	10	0	0	3.7	3.7	A0A1P8B0Q8	A0A1P8B0Q8	191	At2g26200	Methyltransferase-like protein
262572422027588	264740581512451	260363883972168	NaN			calcium ion binding [GO:0005509]	3	0	9.0477	509290000	8	9	22.8	20.7	0	A0A1P8B183	A0A1P8B183	194	TCH3	Calcium-binding EF hand family protein
242685661315918	256701469421387	NaN	NaN			DNA binding [GO:0003677];metal ion binding [GO:0046872]	9	0	7.7672	1090700000	32	0.4	1	0	0	A0A1P8B1D0	A0A1P8B1D0	195	NERD	GW repeat-and PHD finger-containing protein NERD
278837280273438	278838443756104	278613586425781	279552116394043			ureidoglycolate hydrolase activity [GO:0004848]	6	0	46.578	3321200000	55	23.8	23.8	21.3	18.1	A0A1P8B223	A0A1P8B223	200	At2g35820	Ureidoglycolate hydrolase
303734760284424	303191547393799	298123607635498	30246265411377			peptidyl-prolyl cis-trans isomerase activity [GO:0003755]	16	0	215.21	19865000000	217	49.7	49.7	47.9	67.7	A0A1P8B252	A0A1P8B252	201	At2g43560	Peptidylprolyl isomerase
289929943084717	294497489929199	29733341217041	299872570037842			hydrolase activity [GO:0016787]	16	0	82.805	3198000000	48	51.6	50.7	51.6	40	A0A1P8B2T3	A0A1P8B2T3	207	At2g32150	Haloacid dehalogenase-like hydrolase (HAD) superfamily protein
NaN	NaN	243054256439209	243091773986816		integral component of membrane [GO:0016021]	aspartic-type endopeptidase activity [GO:0004190]	1	0.0013104	2.3751	101350000	8	1.7	1.7	1.7	1.7	A0A1P8B2Y1	A0A1P8B2Y1	208	SPPL3	SIGNAL PEPTIDE PEPTIDASE-LIKE 3
284298992156982	21833101272583	292793674468994	NaN				29	0	16.624	1578200000	16	38.8	38.8	38.2	31.8	A0A1P8B345	A0A1P8B345	209	UXS6	UDP-XYL synthase 6
259234981536865	26186767578125	250380001068115	255315418243408	intracellular protein transport [GO:0006886];vesicle-mediated transport [GO:0016192]	clathrin adaptor complex [GO:0030131]		40	0	27.726	3628600000	54	5	7.5	5.5	6.8	A0A1P8B3B6	A0A1P8B3B6	210	At4g23460	Beta-adaptin-like protein
249906215667725	251521301269531	249533138275146	269511585235596	signal transduction [GO:0007165]		ADP binding [GO:0043531]	23	0	19.189	1783000000	61	0.8	0.8	0.8	1.7	A0A1P8B3F3	A0A1P8B3F3	212	RPP5	Disease resistance protein (TIR-NBS-LRR class) family
265899219512939	269573726654053	268951587677002	266821746826172	response to abscisic acid [GO:0009737]			4	0	3.9966	1436500000	8	10.2	10.2	10.2	8	A0A1P8B3K6	A0A1P8B3K6	213	At4g25580	CAP160 protein
258904342651367	25413028717041	267275428771973	262433433532715		endoplasmic reticulum membrane [GO:0005789];integral component of membrane [GO:0016021]	flavin adenine dinucleotide binding [GO:0050660];FMN binding [GO:0010181];NADP binding [GO:0050661];NADPH-hemoprotein reductase activity [GO:0003958]	18	0	24.915	2730500000	74	9.2	7.1	5.8	8.1	A0A1P8B3S1	A0A1P8B3S1	215	ATR2	NADPH--cytochrome P450 reductase
32744026184082	327875862121582	328509521484375	327548561096191	carbohydrate metabolic process [GO:0005975]		hydrolase activity, hydrolyzing O-glycosyl compounds [GO:0004553]	21	0	323.31	107200000000	588	65.7	60	68.3	62.9	A0A1P8B3U2	A0A1P8B3U2	216	At4g16260	Glycosyl hydrolase superfamily protein
249504699707031	245458068847656	253312873840332	250620460510254				5	0	5.8976	1140100000	26	16.1	16.1	16.1	6	A0A1P8B3Z7	A0A1P8B3Z7	217	RRP41L	3'-5'-exoribonuclease family protein
321034317016602	325801734924316	32068431854248	321006164550781	protein import [GO:0017038];protein targeting [GO:0006605]	membrane [GO:0016020]	ATP binding [GO:0005524]	88	0	323.31	52439000000	867	62.1	60.9	61.2	58.9	A0A1P8B485	A0A1P8B485	222	AGY1	Protein translocase subunit SecA
23989278793335	242068729400635	NaN	238755836486816	transcription, DNA-templated [GO:0006351]		chromatin binding [GO:0003682]	6	0.0052365	1.8158	701760000	21	2.7	1.4	0	2.7	A0A1P8B497	A0A1P8B497	223	At4g11560	Bromo-adjacent homology (BAH) domain-containing protein
259592533111572	25326150894165	255070018768311	25353666305542		90S preribosome [GO:0030686];nucleolus [GO:0005730];small-subunit processome [GO:0032040]		7	0.0057627	1.7656	944090000	14	0.9	0.9	1.3	0.6	A0A1P8B4E4	A0A1P8B4E4	224	At4g30990	ARM repeat superfamily protein
250673904418945	247547073364258	NaN	246050682067871	mRNA splicing, via spliceosome [GO:0000398]	catalytic step 2 spliceosome [GO:0071013];integral component of membrane [GO:0016021];precatalytic spliceosome [GO:0071011];U12-type spliceosomal complex [GO:0005689];U2 snRNP [GO:0005686];U2-type spliceosomal complex [GO:0005684]		13	0	68.048	2451500000	52	1.6	1.6	0	1.6	A0A1P8B4Y6	A0A1P8B4Y6	226	At4g21660	Proline-rich spliceosome-associated (PSP) family protein
248713130950928	254948787689209	250411796569824	255778465270996			ATP binding [GO:0005524];hydrolase activity [GO:0016787];protein kinase activity [GO:0004672]	3	0.0043628	1.8973	733510000	5	1.2	3	3	3	A0A1P8B5B9	A0A1P8B5B9	229	At4g31230	Kinase with adenine nucleotide alpha hydrolases-like domain-containing protein
260051097869873	255903224945068	259259223937988	257144756317139			hydrolase activity [GO:0016787]	3	0	23.399	1188700000	22	6	6	6	6	A0A1P8B5J8	A0A1P8B5J8	231	At4g03610	Metallo-hydrolase/oxidoreductase superfamily protein
303974418640137	300971031188965	317306480407715	301274337768555				7	0	32.23	9200000000	14	38.3	22.1	32.5	32.5	A0A1P8B5Y3	A0A1P8B5Y3	233	SEN1	Rhodanese/Cell cycle control phosphatase superfamily protein
267884292602539	268002052307129	268294143676758	269645519256592	cell wall organization [GO:0071555]	cell wall [GO:0005618];extracellular region [GO:0005576];integral component of membrane [GO:0016021]	hydrolase activity [GO:0016787]	6	0	22.917	1541900000	60	14.4	20.4	20.4	9	A0A1P8B651	A0A1P8B651	235	PAE8	Pectin acetylesterase
321075248718262	321697959899902	320908737182617	320759735107422		cytoplasm [GO:0005737]	metal ion binding [GO:0046872];metalloaminopeptidase activity [GO:0070006]	49	0	323.31	81299000000	746	65	66.1	68.3	68.3	A0A1P8B667	A0A1P8B667	236	APP1	Aminopeptidase P1
NaN	264652881622314	253986854553223	252048606872559	dTMP biosynthetic process [GO:0006231];methylation [GO:0032259];one-carbon metabolic process [GO:0006730];tetrahydrofolate biosynthetic process [GO:0046654]		dihydrofolate reductase activity [GO:0004146];thymidylate synthase activity [GO:0004799]	11	0	24.872	2644000000	25	4.2	3.7	7.7	3.3	A0A1P8B676	A0A1P8B676	237	THY-2	Bifunctional dihydrofolate reductase-thymidylate synthase
246374359130859	NaN	NaN	248222103118896	deoxyribonucleoside triphosphate catabolic process [GO:0009204];nucleotide metabolic process [GO:0009117]	cytoplasm [GO:0005737]	dTTP diphosphatase activity [GO:0036218];metal ion binding [GO:0046872];NADH pyrophosphatase activity [GO:0035529];nucleotide binding [GO:0000166]	2	0.00094447	2.5479	754190000	13	5.5	0	0	5.5	A0A1P8B687	A0A1P8B687	238	At4g13720	Inosine triphosphate pyrophosphatase
254149971008301	252476425170898	253430633544922	249102668762207			ATP binding [GO:0005524];protein kinase activity [GO:0004672]	7	0.0036463	1.9459	613610000	4	5.6	5.6	6.7	4.2	A0A1P8B6A6	A0A1P8B6A6	239	At4g10730	Protein kinase superfamily protein
227456474304199	NaN	NaN	228389015197754	CTP biosynthetic process [GO:0006241];'de novo' CTP biosynthetic process [GO:0044210];glutamine metabolic process [GO:0006541];pyrimidine nucleobase biosynthetic process [GO:0019856]		ATP binding [GO:0005524];CTP synthase activity [GO:0003883];identical protein binding [GO:0042802]	15	0	29.353	3130600000	68	4.3	0	0	6.4	A0A1P8B6F9	A0A1P8B6F9	240	At4g02120	CTP synthase
266454010009766	267976112365723	271789264678955	271549911499023	defense response [GO:0006952]	extracellular region [GO:0005576]	kinase activity [GO:0016301]	7	0	17.229	1993900000	24	11.5	14.8	15.2	9.9	A0A1P8B6P8	A0A1P8B6P8	243	At4g18253	Receptor Serine/Threonine kinase-like protein
240026454925537	261033363342285	263661308288574	264168834686279				12	0	24.613	1622000000	48	2.7	2.5	4.4	3.6	A0A1P8B770	A0A1P8B770	246	G2484-1	G2484-1 protein
232488880157471	232150611877441	233117446899414	237210884094238			oxidoreductase activity [GO:0016491]	2	0.00019283	2.9064	167440000	11	6.2	2.2	6.2	6.2	A0A1P8B7E6	A0A1P8B7E6	248	At4g32360	Pyridine nucleotide-disulfide oxidoreductase family protein
249561538696289	25276575088501	252960357666016	250175876617432	ER-associated misfolded protein catabolic process [GO:0071712];ubiquitin-dependent ERAD pathway [GO:0030433]	VCP-NPL4-UFD1 AAA ATPase complex [GO:0034098]	polyubiquitin modification-dependent protein binding [GO:0031593]	11	0	51.34	1702500000	35	2.9	1.3	1.3	1.3	A0A1P8B7F5	A0A1P8B7F5	249	At4g15420	Ubiquitin fusion degradation UFD1 family protein
250912380218506	253912296295166	257323398590088	262938289642334	polysaccharide catabolic process [GO:0000272]		amylopectin maltohydrolase activity [GO:0102229];beta-amylase activity [GO:0016161]	8	0	12.938	740780000	24	14.6	13.5	4.9	11.2	A0A1P8B7H0	A0A1P8B7H0	251	BAM5	Beta-amylase
294137115478516	292483253479004	290421047210693	292476234436035				15	0	59.973	7010200000	111	32.7	32.1	32.7	32.7	A0A1P8B7H4	A0A1P8B7H4	252	At4g20750	NAD(P)-binding Rossmann-fold superfamily protein
277877445220947	27519983291626	273711910247803	273855800628662			RNA binding [GO:0003723]	1	0.0095137	1.4976	2322900000	40	1.2	1.2	1.2	1.2	A0A1P8B7L2	A0A1P8B7L2	253	At4g29750	CRS1 / YhbY (CRM) domain-containing protein
257278289794922	260506134033203	258985290527344	25892822265625			metal ion binding [GO:0046872];oxidoreductase activity [GO:0016491]	3	0	3.8097	1211000000	27	8.1	3	3	8.1	A0A1P8B7P9	A0A1P8B7P9	256	At4g16765	2-oxoglutarate (2OG) and Fe(II)-dependent oxygenase superfamily protein
282825527191162	281839504241943	281900882720947	283626899719238	RNA processing [GO:0006396]		RNA binding [GO:0003723];RNA methyltransferase activity [GO:0008173]	12	0	8.1502	6202200000	39	1.1	1.1	1.6	1.1	A0A1P8B7Z4	A0A1P8B7Z4	259	At4g17610	tRNA/rRNA methyltransferase (SpoU) family protein
26146276473999	263542556762695	256047286987305	262745151519775	xylan catabolic process [GO:0045493]	cell wall [GO:0005618]	endo-1,4-beta-xylanase activity [GO:0031176]	8	0	12.76	1400000000	30	10.5	12.1	10.5	4.4	A0A1P8B8F8	A0A1P8B8F8	261	XYN5	Endo-1,4-beta-xylanase 5
230401096343994	230005664825439	NaN	NaN		integral component of membrane [GO:0016021]	ATP binding [GO:0005524];protein kinase activity [GO:0004672]	3	0.0014859	2.2704	1354300000	6	1.1	1.1	0	0	A0A1P8B8L9	A0A1P8B8L9	263	EMB1290	Cysteine-rich receptor-like protein kinase 17
30692289352417	306415996551514	308660697937012	308149757385254				82	0	323.31	64097000000	798	39.7	38.7	40.5	37.9	A0A1P8B8R9	A0A1P8B8R9	265	At4g16660	Heat shock protein 70 (Hsp 70) family protein
27843620300293	285940589904785	283428249359131	281645164489746				11	0	66.625	5463300000	104	13.8	18.2	13.8	13.8	A0A1P8B9A7	A0A1P8B9A7	267	CYL1	Alpha-N-acetylglucosaminidase family / NAGLU family
250690307617188	254947566986084	254419918060303	256379337310791				12	0	3.8657	1101500000	26	4.7	2.7	5.5	7.1	A0A1P8B9J5	A0A1P8B9J5	270	MFC19.17	RNI-like superfamily protein
276508197784424	274674663543701	274856204986572	274517555236816	carboxylic acid metabolic process [GO:0019752]		transferase activity, transferring acyl groups, acyl groups converted into alkyl on transfer [GO:0046912]	49	0	323.31	36346000000	374	19.7	18.2	18.4	14	A0A1P8B9L6	A0A1P8B9L6	271	MAM1	Methylthioalkylmalate synthase 1
306700839996338	30282506942749	304196090698242	30408618927002			peptidyl-prolyl cis-trans isomerase activity [GO:0003755]	16	0	253.23	17410000000	152	54.1	46.6	51.7	51.4	A0A1P8B9P2	A0A1P8B9P2	272	At5g35100	Cyclophilin-like peptidyl-prolyl cis-trans isomerase family protein
NaN	229146633148193	219469947814941	NaN	negative regulation of translation [GO:0017148];nuclear-transcribed mRNA poly(A) tail shortening [GO:0000289];regulation of transcription, DNA-templated [GO:0006355]	CCR4-NOT core complex [GO:0030015];host cell nucleus [GO:0042025];nucleus [GO:0005634];P-body [GO:0000932]	poly(A)-specific ribonuclease activity [GO:0004535]	13	0	81.647	2137300000	57	0	1.2	0.7	0	A0A1P8B9R0	A0A1P8B9R0	273	MRG7.19	Transcription regulator NOT2/NOT3/NOT5 family protein
300081176757813	299699382781982	299391574859619	299247894287109	glucan catabolic process [GO:0009251]		beta-glucosidase activity [GO:0008422]	27	0	240.32	17552000000	273	27.6	35.6	33.1	37.2	A0A1P8B9U3	A0A1P8B9U3	274	At5g04885	Glycosyl hydrolase family protein
250548210144043	254430370330811	252158985137939	250303592681885	COPII vesicle coating [GO:0048208];protein transport [GO:0015031]	endoplasmic reticulum [GO:0005783];Golgi membrane [GO:0000139]		9	0.00075988	2.6255	570020000	14	3.1	2.2	1.2	1.5	A0A1P8B9X0	A0A1P8B9X0	275	MNJ7.8	Protein transport protein sec16
254085655212402	247616214752197	260031814575195	255354919433594	proteasome regulatory particle assembly [GO:0070682]	cytoplasm [GO:0005737];nucleus [GO:0005634];proteasome complex [GO:0000502]		7	0	70.19	1215800000	37	7.4	13.7	16.8	18.8	A0A1P8BA81	A0A1P8BA81	277	MTI20.21	26S proteasome regulatory subunit
293728122711182	293427200317383	29287425994873	307016544342041				17	0	176	15097000000	142	45.9	44.4	45.9	44.4	A0A1P8BAQ0	A0A1P8BAQ0	279	MNC6.3	Tetratricopeptide repeat (TPR)-like superfamily protein
271887683868408	269060974121094	269013862609863	268628978729248			heme binding [GO:0020037];metal ion binding [GO:0046872]	8	0	8.2796	1938400000	39	30.7	26.8	29.6	21.4	A0A1P8BAR6	A0A1P8BAR6	280	RLF	Reduced lateral root formation
29890266418457	300402240753174	300842342376709	302619247436523	carbohydrate metabolic process [GO:0005975]		carbohydrate binding [GO:0030246];hydrolase activity, hydrolyzing O-glycosyl compounds [GO:0004553]	61	0	301.97	65011000000	588	22.5	15.8	23.1	26.5	A0A1P8BAU5	A0A1P8BAU5	282	RSW3	Glycosyl hydrolases family 31 protein
240376663208008	23698694229126	NaN	NaN				1	0	3.9268	308850000	12	3.6	3.6	3.6	0	A0A1P8BAY4	A0A1P8BAY4	283	RUG3	Regulator of chromosome condensation (RCC1) family protein
309153461456299	308211479187012	309283237457275	310321655273438	L-methionine salvage from methylthioadenosine [GO:0019509];L-methionine salvage from S-adenosylmethionine [GO:0019284]	cytoplasm [GO:0005737]	2,3-diketo-5-methylthiopentyl-1-phosphate enolase activity [GO:0043715];2-hydroxy-3-keto-5-methylthiopentenyl-1-phosphate phosphatase activity [GO:0043716];acireductone synthase activity [GO:0043874];magnesium ion binding [GO:0000287];methylthioribulose 1-phosphate dehydratase activity [GO:0046570];zinc ion binding [GO:0008270]	39	0	323.31	36082000000	552	55.6	54.7	57	49.7	A0A1P8BAY5	A0A1P8BAY5	284	DEP1	Probable bifunctional methylthioribulose-1-phosphate dehydratase/enolase-phosphatase E1
311828136444092	311073055267334	309540061950684	309727478027344			catalytic activity [GO:0003824]	28	0	296.3	24455000000	293	52.4	52.2	53.9	55.2	A0A1P8BB43	A0A1P8BB43	285	MDJ22.4	Phosphoglycerate/bisphosphoglycerate mutase family protein
268079624176025	256566543579102	259537372589111	254701690673828			RNA binding [GO:0003723]	13	0	26.302	4015400000	53	8.6	6.6	12	8.3	A0A1P8BBW1	A0A1P8BBW1	292	At5g15270	RNA-binding KH domain-containing protein
268356914520264	270468730926514	269475975036621	272142868041992	intracellular protein transport [GO:0006886]	nucleus [GO:0005634]	Ran GTPase binding [GO:0008536]	21	0	49.863	3611300000	89	1	1	1	1	A0A1P8BC62	A0A1P8BC62	294	At5g06120	ARM repeat superfamily protein
260894603729248	261593475341797	265096168518066	264566669464111			FAD binding [GO:0071949];oxidoreductase activity [GO:0016491]	12	0	11.105	1141600000	26	10	8.4	11.4	13.3	A0A1P8BCJ3	A0A1P8BCJ3	295	At5g44380	FAD-binding Berberine family protein
253841972351074	254438591003418	254915199279785	253281383514404	pentose-phosphate shunt, non-oxidative branch [GO:0009052]		ribose-5-phosphate isomerase activity [GO:0004751];transferase activity [GO:0016740]	4	0	25.575	765910000	26	11.3	11.3	7.1	11.3	A0A1P8BDP5	A0A1P8BDP5	299	MFC16.20	NagB/RpiA/CoA transferase-like superfamily protein
270647621154785	271439437866211	273244018554688	272679405212402	chloroplast accumulation movement [GO:0009904];microtubule-based movement [GO:0007018]		ATP binding [GO:0005524];microtubule binding [GO:0008017];microtubule motor activity [GO:0003777]	35	0	42.543	3550000000	87	15.2	13	14.1	12.4	A0A1P8BDP7	A0A1P8BDP7	300	KAC2	Kinesin like protein for actin based chloroplast movement 2
260817623138428	2629372215271	260750026702881	257894496917725	galactose metabolic process [GO:0006012]	integral component of membrane [GO:0016021]	UDP-glucose 4-epimerase activity [GO:0003978]	5	0.00075945	2.6097	2046300000	8	2.4	2.4	2.4	2.4	A0A1P8BDS3	A0A1P8BDS3	301	DUR	NAD(P)-binding Rossmann-fold superfamily protein
280124397277832	280997886657715	279652118682861	279332027435303		anaphase-promoting complex [GO:0005680];integral component of membrane [GO:0016021]	ligase activity [GO:0016874]	8	0	5.7995	4852900000	33	3.3	3.3	3.9	2.1	A0A1P8BDT7	A0A1P8BDT7	303	EMB2771	E3 ubiquitin ligase
264283351898193	263780059814453	265977573394775	26803165435791				23	0	34.147	3347300000	69	3.1	7	6.2	6.5	A0A1P8BDV1	A0A1P8BDV1	304	MQJ2.5	Tetratricopeptide repeat (TPR)-like superfamily protein
NaN	223570003509521	221483345031738	221396179199219	protein targeting to peroxisome [GO:0006625]	peroxisomal membrane [GO:0005778]	ATP binding [GO:0005524];ATPase activity [GO:0016887]	5	0	3.5945	378020000	19	0	0.8	0.8	0.8	A0A1P8BDY2	A0A1P8BDY2	305	PEX1	Peroxisome 1
265033054351807	26670877456665	28513032913208	270496788024902		integral component of membrane [GO:0016021]		12	0	20.156	8107600000	39	1.6	5.6	4.4	4.6	A0A1P8BE11	A0A1P8BE11	306	At5g52580	RabGAP/TBC domain-containing protein
245955963134766	248032646179199	245086345672607	244856662750244			nucleic acid binding [GO:0003676]	4	0	4.3746	522040000	5	1.2	1.2	1.2	1.2	A0A1P8BE91	A0A1P8BE91	307	SDN3	Small RNA degrading nuclease 3
26778938293457	268890190124512	266089363098145	269614639282227				12	0	29.729	1743700000	73	14	15.7	15.7	11.6	A0A1P8BEF2	A0A1P8BEF2	308	At5g67385	Phototropic-responsive NPH3 family protein
254358711242676	25889575958252	253413677215576	261267986297607			transferase activity [GO:0016740]	9	0	7.5419	1495400000	13	1.1	1.1	2.7	1.1	A0A1P8BER5	A0A1P8BER5	311	MKP11.12	Protein prenylyltransferase superfamily protein
27821346282959	275136737823486	278433208465576	279967956542969		chloroplast [GO:0009507]	isomerase activity [GO:0016853]	13	0	23.986	5369400000	82	26.1	26.1	12.1	24.3	A0A1P8BEU1	A0A1P8BEU1	313	At5g27390	Tagatose-6-phosphate ketose/aldose isomerase, putative (Mog1/PsbP/DUF1795-like photosystem II reaction center PsbP family protein)
255256996154785	256918163299561	252252330780029	260710182189941			peptide-methionine (S)-S-oxide reductase activity [GO:0008113]	8	0	45.428	1659900000	21	34.1	30.1	26.6	24	A0A1P8BF28	A0A1P8BF28	314	PMSR1	Peptidemethionine sulfoxide reductase 1
295017471313477	294964237213135	294184646606445	293838310241699			ATP binding [GO:0005524]	102	0	323.31	26584000000	289	73.6	71.6	71.8	71.6	A0A1P8BF32	A0A1P8BF32	315	BIP2	Heat shock protein 70 (Hsp 70) family protein
267756786346436	263592929840088	268009471893311	266960430145264				15	0	26.442	2962200000	50	2.9	4.1	3.5	4	A0A1P8BF80	A0A1P8BF80	316	MPO12.6	Tudor/PWWP/MBT superfamily protein
292970161437988	302679634094238	295788822174072	296674289703369			GTP binding [GO:0005525];GTPase activity [GO:0003924];metal ion binding [GO:0046872];translation elongation factor activity [GO:0003746];translation initiation factor activity [GO:0003743]	5	0	5.2597	17040000000	15	1.4	1.4	1.4	1.4	A0A1P8BFE6	A0A1P8BFE6	318	At5g10630	Translation elongation factor EF1A/initiation factor IF2gamma family protein
NaN	262354412078857	268460140228271	271129684448242	mannose metabolic process [GO:0006013]		alpha-mannosidase activity [GO:0004559];carbohydrate binding [GO:0030246];metal ion binding [GO:0046872]	2	0	7.6747	2386000000	42	0.9	1.6	2.5	2.5	A0A1P8BFL6	A0A1P8BFL6	320	At5g66150	Alpha-mannosidase
337298393249512	338326225280762	338530387878418	336695556640625				42	0	323.31	214960000000	765	72.8	70.4	67.8	66.2	A0A1P8BG37	A0A1P8BG37	324	HCF136	Photosystem II stability/assembly factor, chloroplast (HCF136)
31727445602417	317738018035889	31785852432251	317808570861816	carbohydrate metabolic process [GO:0005975]		intramolecular transferase activity, phosphotransferases [GO:0016868]	44	0	323.31	58738000000	605	73.8	72.7	64	61.6	A0A1P8BGJ0	A0A1P8BGJ0	327	At5g17530	Phosphoglucosamine mutase family protein
259315242767334	26035758972168	NaN	259349002838135	signal transduction [GO:0007165]		ADP binding [GO:0043531]	12	0	10.69	1254100000	32	1.1	1.1	0	2.2	A0A1P8BGN6	A0A1P8BGN6	328	At5g45210	Disease resistance protein (TIR-NBS-LRR class) family
253991088867188	260090045928955	254515819549561	262084369659424				3	0	3.2153	1034300000	8	3.5	9.1	9.1	9.1	A0A1P8BGX1	A0A1P8BGX1	330	At5g27710	T-box protein
245903511047363	240764312744141	NaN	NaN		nuclear pore [GO:0005643]		20	0	36.305	2120200000	67	1.1	1.1	0	0	A0A1P8BGZ1	A0A1P8BGZ1	331	EMB3142	Nuclear pore complex protein (DUF3414)
NaN	23483699798584	237468357086182	240813159942627			electron transfer activity [GO:0009055]	4	0	3.5323	363740000	11	0	2.5	2.5	2.5	A0A1P8BGZ7	A0A1P8BGZ7	332	ENODL1	Early nodulin-like protein 1
245800342559814	NaN	NaN	245416774749756			serine-type endopeptidase activity [GO:0004252]	3	0	5.9862	407570000	12	2.3	0	0	2.3	A0A1P8BHH8	A0A1P8BHH8	336	MFC16.21	Subtilase family protein
262830371856689	264633560180664	263256187438965	26344705581665				2	0	5.5088	1457300000	5	8	3.2	3.2	8	A0A1R7T377	A0A1R7T377	337	At5g27560	DUF1995 domain protein, putative (DUF1995)
275993194580078	277379570007324	276778144836426	276228942871094		mitochondrial matrix [GO:0005759]	electron transfer activity [GO:0009055]	13	0	88.754	4089100000	112	29.4	26.2	29.4	33.7	A0A1R7T3K7	A0A1R7T3K7	339	ETFBETA	Electron transfer flavoprotein subunit beta
369398880004883	368477058410645	368542213439941	36822998046875	glycine catabolic process [GO:0006546]	mitochondrion [GO:0005739]	aminomethyltransferase activity [GO:0004047];transaminase activity [GO:0008483]	70	0	323.31	1615300000000	2772	87.7	87.7	87.7	87.7	A0A2H1ZEA9	A0A2H1ZEA9	341	At1g11860	Aminomethyltransferase
225252799987793	223372611999512	221839542388916	224913539886475	microtubule-based movement [GO:0007018]		ATP binding [GO:0005524];microtubule binding [GO:0008017];microtubule motor activity [GO:0003777]	4	0.00019146	2.7866	138970000	7	2	1.3	1.3	2	A0A2H1ZEJ0	A0A2H1ZEJ0	345	At3g45850	P-loop containing nucleoside triphosphate hydrolases superfamily protein
259641094207764	262637939453125	259678516387939	269203662872314	translation [GO:0006412]	mitochondrion [GO:0005739];ribosome [GO:0005840]	RNA binding [GO:0003723];structural constituent of ribosome [GO:0003735]	16	0	92.14	3705900000	66	1.3	1.3	1.3	3.2	A0A2P2CLF3	A0A2P2CLF3	347	rps3	Ribosomal protein S3
316865386962891	315903148651123	316998348236084	317384395599365	ATP synthesis coupled proton transport [GO:0015986]	mitochondrion [GO:0005739];proton-transporting ATP synthase complex, catalytic core F(1) [GO:0045261]	ATP binding [GO:0005524];proton-transporting ATP synthase activity, rotational mechanism [GO:0046933]	45	0	323.31	138220000000	790	40.4	46.5	50.9	49.5	A0A2P2CLF9	A0A2P2CLF9	350	atp1	ATP synthase subunit alpha
249210262298584	248709831237793	250285892486572	NaN	regulation of RNA splicing [GO:0043484]	nucleoplasm [GO:0005654];ribonucleoprotein complex [GO:1990904];ribosome [GO:0005840]	RNA binding [GO:0003723]	5	0	11.084	858200000	17	11.4	14.5	11.4	0	A0JQ00	A0JQ00	353	At5g02740	At5g02740
292408866882324	291860065460205	288681182861328	289127082824707		cell wall [GO:0005618];vacuole [GO:0005773]		6	0	276.22	8110300000	135	35.1	44	44	44	A0JQ12	A0JQ12	354	At1g76020	At1g76020
306995048522949	307478313446045	307085781097412	307441463470459	D-ribose catabolic process [GO:0019303];nucleoside metabolic process [GO:0009116]	chloroplast [GO:0009507];chloroplast nucleoid [GO:0042644];chloroplast stroma [GO:0009570];nucleus [GO:0005634];plastid nucleoid [GO:0042646]	ATP binding [GO:0005524];metal ion binding [GO:0046872];ribokinase activity [GO:0004747]	23	0	308	27640000000	304	54.4	50.1	52.8	43.5	A1A6H3	A1A6H3	355	RBSK	Ribokinase
225525531768799	NaN	221842269897461	227491092681885		nucleus [GO:0005634]	AT DNA binding [GO:0003680]	3	0	13.122	234330000	6	7.3	0	7.3	7.3	A1L4X7	A1L4X7	356	AHL14	AT-hook motif nuclear-localized protein 14
244494743347168	242160835266113	243205852508545	NaN		chloroplast stroma [GO:0009570]	ATP binding [GO:0005524];ATPase activity [GO:0016887]	5	0	5.257	494400000	19	10.5	3.4	4.9	1.5	A1L4Y1	A1L4Y1	357	GET3B	ATPase GET3B
312984371185303	313410663604736	313099727630615	315048370361328	cellular response to oxidative stress [GO:0034599];response to high light intensity [GO:0009644]	cytoplasm [GO:0005737];cytosol [GO:0005829];plastid [GO:0009536]	AU-rich element binding [GO:0017091];NADPH:quinone reductase activity [GO:0003960]	32	0	318.16	56926000000	453	61.3	58.6	52	50.5	A1L4Y4	A1L4Y4	358	At5g61510	At5g61510
279644412994385	280407199859619	280977821350098	281347694396973	heat acclimation [GO:0010286];negative regulation of gene silencing [GO:0060969];regulation of cellular response to heat [GO:1900034];regulation of mitotic chromosome decondensation [GO:1901651];response to heat [GO:0009408]	chromocenter [GO:0010369];nucleolus [GO:0005730]		22	0	96.737	6368100000	151	28.8	28.3	24.9	24.9	A2RVJ8	A2RVJ8	359	HIT4	Protein HEAT INTOLERANT 4
250059032440186	247480144500732	249423923492432	NaN	RNA processing [GO:0006396]	cytoplasm [GO:0005737];nuclear exosome (RNase complex) [GO:0000176];plastid [GO:0009536]	RNA binding [GO:0003723]	6	0	7.9096	943710000	22	5.2	5.2	5.2	0	A2RVT9	A2RVT9	362	At5g38890	AT5G38890 protein
288932495117188	287592296600342	290403804779053	292021217346191				16	0	102.01	8834900000	191	35.7	36.3	39.8	33.7	A2RVV4	A2RVV4	363	MRI1.6	At5g57700
26541618347168	262873783111572	263044853210449	265916366577148	one-carbon metabolic process [GO:0006730];photorespiration [GO:0009853];tetrahydrofolate interconversion [GO:0035999]	cytosol [GO:0005829];mitochondrion [GO:0005739]	methenyltetrahydrofolate cyclohydrolase activity [GO:0004477];methylenetetrahydrofolate dehydrogenase (NADP+) activity [GO:0004488]	9	0	11.112	2186200000	58	26.4	16.2	16.2	22.4	A2RVV7	A2RVV7	364	FOLD1	Bifunctional protein FolD 1, mitochondrial
276745853424072	274889945983887	276886577606201	275224552154541	histone H3-R17 methylation [GO:0034971];histone H3-R2 methylation [GO:0034970];histone H3-R26 methylation [GO:0034972];peptidyl-arginine methylation, to asymmetrical-dimethyl arginine [GO:0019919];regulation of flower development [GO:0009909];vegetative to reproductive phase transition of meristem [GO:0010228]	chloroplast [GO:0009507];cytoplasm [GO:0005737];nucleus [GO:0005634]	[myelin basic protein]-arginine N-methyltransferase activity [GO:0016277];histone-arginine N-methyltransferase activity [GO:0008469];protein heterodimerization activity [GO:0046982];protein homodimerization activity [GO:0042803];protein-arginine omega-N asymmetric methyltransferase activity [GO:0035242];protein-arginine omega-N monomethyltransferase activity [GO:0035241]	25	0	65.746	8538800000	153	30.1	17.8	25	21.2	A3KPF2	A3KPF2	366	PRMT14	Probable histone-arginine methyltransferase 1.4
254071731567383	254872932434082	250006256103516	235003299713135		spliceosomal complex [GO:0005681]		11	0	24.361	831980000	21	2.6	2.6	2.6	4.2	A3KPF3	A3KPF3	367	At3g02710	ARM repeat superfamily protein
276321468353271	274296588897705	270378952026367	271509304046631		chloroplast [GO:0009507]		1	0.010011	1.4614	2002600000	20	1.4	1.4	1.4	1.4	A3KPF8	A3KPF8	368	At1g79080	Pentatricopeptide repeat-containing protein At1g79080, chloroplastic
238338356018066	264247188568115	NaN	236748676300049	mRNA splicing, via spliceosome [GO:0000398]	catalytic step 2 spliceosome [GO:0071013];extracellular region [GO:0005576]		9	0	13.471	2320600000	49	2.1	2.1	0	4	A4FVN8	A4FVN8	369	At1g10580	At1g10580
251456165313721	24888090133667	244927730560303	244337711334229	phosphatidylethanolamine biosynthetic process [GO:0006646];protein autoprocessing [GO:0016540]	cytosol [GO:0005829];endoplasmic reticulum [GO:0005783];endoplasmic reticulum membrane [GO:0005789]	calcium ion binding [GO:0005509];phosphatidylserine decarboxylase activity [GO:0004609]	9	0	4.3225	1800500000	21	6.8	6.8	6.8	6.8	A4GNA8	A4GNA8	370	PSD3	Phosphatidylserine decarboxylase proenzyme 3
275905647277832	NaN	281495265960693	NaN	proteolysis [GO:0006508]	vacuole [GO:0005773]	carboxypeptidase activity [GO:0004180];dipeptidyl-peptidase activity [GO:0008239];serine-type peptidase activity [GO:0008236]	21	0	22.423	6579900000	14	21.8	16.4	19.7	17.4	A4VCL8	A4VCL8	372	At4g36190	At4g36190
313891544342041	314726161956787	315571403503418	315174236297607	carbohydrate metabolic process [GO:0005975]	cytosol [GO:0005829];secretory vesicle [GO:0099503];vacuole [GO:0005773]	beta-N-acetylhexosaminidase activity [GO:0004563];hexosaminidase activity [GO:0015929];N-acetyl-beta-D-galactosaminidase activity [GO:0102148]	31	0	292.57	54172000000	386	51.4	39.4	46.4	49.5	A7WM73	A7WM73	373	HEXO1	Beta-hexosaminidase 1
242416172027588	239125995635986	243543395996094	244220104217529			RNA binding [GO:0003723]	9	0	119.07	2906000000	41	5.7	5.7	9.6	3.9	A8MQ78	A8MQ78	375	ALY4	ALWAYS EARLY 4
275647087097168	27532075881958	269707069396973	274129638671875			hydrolase activity [GO:0016787]	12	0	31.139	2594200000	79	18.8	25.4	19.5	17.3	A8MQE3	A8MQE3	377	At5g25770	Alpha/beta-Hydrolases superfamily protein
274950313568115	276114711761475	275752086639404	273633594512939		integral component of membrane [GO:0016021];nucleus [GO:0005634];plasma membrane [GO:0005886]	ATP binding [GO:0005524];protein kinase activity [GO:0004672]	8	0	8.4883	2023800000	39	9.9	9	9	9	A8MQH3	A8MQH3	378	SRF6	STRUBBELIG-receptor family 6
252723445892334	25321720123291	252349472045898	256466102600098				3	0	72.752	1260600000	37	13	13	13	20.9	A8MQJ8	A8MQJ8	380	At2g37680	Glucose-induced degradation-like protein
274564628601074	27703519821167	27530216217041	276210079193115		nascent polypeptide-associated complex [GO:0005854]		11	0	139.01	7359900000	81	26.1	30.8	30.8	30.8	A8MQP6	A8MQP6	381	At4g10480	Nascent polypeptide-associated complex (NAC), alpha subunit family protein
325431251525879	324447021484375	325115928649902	324779815673828			methylmalonate-semialdehyde dehydrogenase (acylating) activity [GO:0004491]	39	0	323.31	72820000000	602	43.6	50.6	50.2	47.8	A8MQR6	A8MQR6	382	ALDH6B2	Aldehyde dehydrogenase 6B2
269828319549561	266151237487793	266797618865967	267275428771973			RNA binding [GO:0003723]	15	0	113.17	7545100000	80	14.2	14.4	13.7	11.4	A8MR27	A8MR27	385	PTB3	Polypyrimidine tract-binding protein 3
268556690216064	270962753295898	26774169921875	269364070892334				6	0	48.615	1841500000	42	24	19.8	24	19.8	A8MR72	A8MR72	386	At2g26210	Ankyrin repeat family protein
279824504852295	281221828460693	28169734954834	280327033996582			translation initiation factor activity [GO:0003743]	39	0	244.99	9720700000	203	11.3	11.5	9.2	6.7	A8MR97	A8MR97	387	EIF4G	Eukaryotic translation initiation factor 4G
230130615234375	255014247894287	231526870727539	236347808837891	nucleosome assembly [GO:0006334]	nucleus [GO:0005634]		37	0	323.31	23124000000	236	5.6	8.8	5.6	4	A8MRK6	A8MRK6	389	NAP1:2	Nucleosome assembly protein 12
229703388214111	231983242034912	229937419891357	22962028503418	cellular glucose homeostasis [GO:0001678];glycolytic process [GO:0006096]		ATP binding [GO:0005524];glucose binding [GO:0005536];hexokinase activity [GO:0004396]	6	0	4.0839	236860000	21	9.2	9.2	5.6	7.1	A8MRW9	A8MRW9	391	HXK2	Phosphotransferase
265926342010498	267212982177734	273569946289063	278695602416992	glucosinolate biosynthetic process [GO:0019761]		8-methylthiopropyl glucosinolate S-oxygenase activity [GO:0080107];flavin adenine dinucleotide binding [GO:0050660];N,N-dimethylaniline monooxygenase activity [GO:0004499];NADP binding [GO:0050661]	32	0	159.83	16242000000	223	13.1	18.7	20.7	18.3	A8MRX0	A8MRX0	392	FMOGS-OX5	Flavin-containing monooxygenase FMO GS-OX5
2911696434021	290406932830811	29147611618042	293815021514893	acetyl-CoA biosynthetic process from pyruvate [GO:0006086];cell redox homeostasis [GO:0045454];oxidation-reduction process [GO:0055114];response to arsenic-containing substance [GO:0046685]	chloroplast envelope [GO:0009941];chloroplast stroma [GO:0009570];cytosol [GO:0005829];nucleolus [GO:0005730]	dihydrolipoyl dehydrogenase activity [GO:0004148];flavin adenine dinucleotide binding [GO:0050660]	44	0	323.31	22833000000	272	45.3	44.9	46.5	50.9	A8MS68	A8MS68	396	LPD1	Dihydrolipoyl dehydrogenase 1, chloroplastic
224523181915283	216256904602051	223884010314941	NaN	chromatin maintenance [GO:0070827];embryo development ending in seed dormancy [GO:0009793];mRNA transcription by RNA polymerase II [GO:0042789];nucleosome organization [GO:0034728];positive regulation of transcription elongation from RNA polymerase II promoter [GO:0032968];regulation of mRNA processing [GO:0050684];transcription elongation from RNA polymerase II promoter [GO:0006368]	cytosol [GO:0005829];plasmodesma [GO:0009506];transcription elongation factor complex [GO:0008023];transcriptionally active chromatin [GO:0035327]	histone binding [GO:0042393];nucleosome binding [GO:0031491];translation elongation factor activity [GO:0003746]	42	0	189.62	10332000000	199	2.3	2.9	3.8	0	A8MS85	A8MS85	397	SPT6	Transcription elongation factor SPT6 homolog
268059959411621	269411182403564	2693337059021	272781715393066		mitochondrial matrix [GO:0005759]		6	0	5.2785	2388700000	31	22.2	10.1	9.7	14.5	A8MSD8	A8MSD8	399	At2g41600	Mitochondrial glycoprotein family protein
256278686523438	256485042572021	251677551269531	256190204620361	cell surface pattern recognition receptor signaling pathway [GO:0002752];cellular response to chitin [GO:0071323];cellular response to molecule of bacterial origin [GO:0071219];defense response to bacterium [GO:0042742];defense response to fungus, incompatible interaction [GO:0009817];detection of molecule of fungal origin [GO:0032491];detection of peptidoglycan [GO:0032499];innate immune respons…	integral component of membrane [GO:0016021];plasma membrane [GO:0005886]	ATP binding [GO:0005524];chitin binding [GO:0008061];chitosan binding [GO:2001080];identical protein binding [GO:0042802];kinase activity [GO:0016301];protein homodimerization activity [GO:0042803];protein kinase activity [GO:0004672];protein self-association [GO:0043621];protein serine/threonine kinase activity [GO:0004674];transmembrane receptor protein kinase activity [GO:0019199]	1	0	3.5337	762750000	17	1.8	1.8	1.8	1.8	A8R7E6	A8R7E6	401	CERK1	Chitin elicitor receptor kinase 1
264915199279785	241296691894531	NaN	263646774291992	intracellular protein transport [GO:0006886];retrograde transport, endosome to Golgi [GO:0042147]	cytosol [GO:0005829];Golgi apparatus [GO:0005794];intracellular membrane-bounded organelle [GO:0043231];late endosome [GO:0005770];late endosome membrane [GO:0031902];membrane [GO:0016020];multivesicular body [GO:0005771];retromer complex [GO:0030904];retromer, cargo-selective complex [GO:0030906]		21	0	46.485	4546500000	69	1	3.4	0	1	A8R7K9	A8R7K9	402	VPS35C	Vacuolar protein sorting-associated protein 35C
249196624755859	NaN	254497261047363	259563102722168	exonucleolytic trimming to generate mature 3'-end of 5.8S rRNA from tricistronic rRNA transcript (SSU-rRNA, 5.8S rRNA, LSU-rRNA) [GO:0000467];gene silencing by RNA-directed DNA methylation [GO:0080188];histone mRNA catabolic process [GO:0071044];nuclear polyadenylation-dependent antisense transcript catabolic process [GO:0071040];nuclear polyadenylation-dependent CUT catabolic process [GO:0071039…	cytoplasm [GO:0005737];cytosol [GO:0005829];nuclear exosome (RNase complex) [GO:0000176];nucleolus [GO:0005730];nucleus [GO:0005634]	3'-5'-exoribonuclease activity [GO:0000175];nucleotide binding [GO:0000166];single-stranded RNA binding [GO:0003727]	11	0	24.471	3141500000	33	1.7	0	2.9	1.1	A9LLI7	A9LLI7	403	RRP6L2	Protein RRP6-like 2
269920482635498	269383163452148	27392147064209	266560821533203	endoplasmic reticulum to Golgi vesicle-mediated transport [GO:0006888];Golgi vesicle docking [GO:0048211];intracellular protein transport [GO:0006886];membrane fusion [GO:0061025];post-embryonic development [GO:0009791];protein exit from endoplasmic reticulum [GO:0032527];transcytosis [GO:0045056];vesicle fusion with Golgi apparatus [GO:0048280]	cytosol [GO:0005829];endoplasmic reticulum [GO:0005783];ER to Golgi transport vesicle membrane [GO:0012507];Golgi apparatus [GO:0005794];Golgi membrane [GO:0000139];Golgi stack [GO:0005795]		35	0	319.31	7052600000	166	11.5	9.2	13.8	13	B0F9L4	B0F9L4	404	GC6	Golgin candidate 6
NaN	NaN	183881435394287	189097061157227		ribosome [GO:0005840]		20	0	259.69	47053000000	203	0	0	9.3	9.3	B3H4B6	B3H4B6	406	At4g39200	40S ribosomal protein S25
295977210998535	299458675384521	296933689117432	297081832885742				12	0	131.46	11730000000	136	47.2	57.5	56.5	49.5	B3H4M0	B3H4M0	408	PIFI	Post-illumination chlorophyll fluorescence increase
294848518371582	294472675323486	294867706298828	294215564727783			translation initiation factor activity [GO:0003743]	26	0	150.49	17743000000	259	41.1	36.6	38.6	36.8	B3H5L3	B3H5L3	411	At1g73180	Eukaryotic translation initiation factor eIF2A family protein
320824584960938	319949645996094	320403213500977	319191875457764	branched-chain amino acid biosynthetic process [GO:0009082]		L-isoleucine transaminase activity [GO:0052656];L-leucine transaminase activity [GO:0052654];L-valine transaminase activity [GO:0052655]	33	0	323.31	96054000000	550	56.7	47.2	56	56	B3H658	B3H658	414	BCAT3	Branched-chain-amino-acid aminotransferase
225404014587402	233711910247803	23244291305542	233222370147705	nucleosome assembly [GO:0006334]	nucleus [GO:0005634]		31	0	303.56	14098000000	176	9.7	13.1	9.7	13.4	B3H684	B3H684	415	NAP1:1	Nucleosome assembly protein11
232947387695313	NaN	23939661026001	NaN	methylation [GO:0032259]		methyltransferase activity [GO:0008168]	2	0.0098436	1.4725	160340000	2	5.1	0	5.1	0	B3H6G9	B3H6G9	416	At4g02405	S-adenosyl-L-methionine-dependent methyltransferases superfamily protein
257989463806152	NaN	250279140472412	253405857086182		integral component of membrane [GO:0016021]		7	0	4.5756	683220000	13	1.2	0	3	3	B3H797	B3H797	419	At4g36210	Transmembrane/coiled-coil protein (DUF726)
220177402496338	226512126922607	221014289855957	NaN	developmental process [GO:0032502];regulation of circadian rhythm [GO:0042752];response to abscisic acid [GO:0009737];response to oxidative stress [GO:0006979];response to water deprivation [GO:0009414];starch metabolic process [GO:0005982]	nucleus [GO:0005634]		2	0	3.0579	291520000	9	1.4	1.4	1.4	0	B3H7F6	B3H7F6	420	TIC	Time for coffee
243245048522949	246933860778809	243280029296875	242534961700439		cytosol [GO:0005829];plasmodesma [GO:0009506];plastid [GO:0009536]	acylglycerol lipase activity [GO:0047372]	5	0	11.948	402050000	12	3	7	10	3	B3H7N1	B3H7N1	423	At5g16120	Alpha/beta-Hydrolases superfamily protein
265854892730713	269619045257568	27105396270752	27015739440918	pectin catabolic process [GO:0045490]		metal ion binding [GO:0046872];pectate lyase activity [GO:0030570]	11	0	25.571	3185700000	63	25.4	29.3	26.6	30.2	B3LF89	B3LF89	424	At3g55140	Pectate lyase
301394367218018	301965980529785	300952186584473	302230854034424	cysteinyl-tRNA aminoacylation [GO:0006423];response to cadmium ion [GO:0046686]	cytoplasm [GO:0005737];cytosol [GO:0005829]	ATP binding [GO:0005524];cysteine-tRNA ligase activity [GO:0004817];metal ion binding [GO:0046872]	39	0	310.29	34156000000	407	46.6	45.2	36.8	32.5	B3LFA4	B3LFA4	425	At5g38830	Cysteine--tRNA ligase 2, cytoplasmic
24327522277832	245688896179199	244200839996338	246039943695068	positive regulation of shoot apical meristem development [GO:1902185]	nucleus [GO:0005634]	ATP binding [GO:0005524];DNA binding [GO:0003677];DNA-dependent ATPase activity [GO:0008094];helicase activity [GO:0004386]	4	0	6.5487	458390000	13	0.4	0.4	0.4	0.4	B5BT18	B5BT18	426	BTAF1	TATA-binding protein-associated factor BTAF1
273197574615479	271497688293457	274867706298828	276556739807129	embryo development ending in seed dormancy [GO:0009793];plastid transcription [GO:0042793]	chloroplast [GO:0009507];cytosol [GO:0005829]	GTP binding [GO:0005525]	17	0	32.714	4728200000	102	17.3	13.3	12.7	13.3	B5X565	B5X565	430	emb2738	At3g12080
284832382202148	285895309448242	287093162536621	282564697265625	gluconeogenesis [GO:0006094]		ATP binding [GO:0005524];kinase activity [GO:0016301];phosphoenolpyruvate carboxykinase (ATP) activity [GO:0004612]	24	0	69.167	2215000000	46	32.4	28.5	37.5	30.6	B5X574	B5X574	431	PCK2	At5g65690
265967617034912	269948558807373	264824695587158	26493688583374				9	0	52.442	2738800000	67	35	54.9	37.9	23.8	B6EUA5	B6EUA5	432	At1g12250	Pentapeptide repeat-containing protein
306091995239258	308292636871338	307615299224854	309718589782715		cytosol [GO:0005829];plasma membrane [GO:0005886];vacuole [GO:0005773]	hydrolase activity, acting on carbon-nitrogen (but not peptide) bonds, in linear amides [GO:0016811]	31	0	323.31	28088000000	405	63.7	58	57.1	60.6	B9DFI3	B9DFI3	435	At4g37550	AT4G37550 protein
256100635528564	233084144592285	241615409851074	235911502838135	ATP synthesis coupled electron transport [GO:0042773]	membrane [GO:0016020]	electron transfer activity [GO:0009055];iron-sulfur cluster binding [GO:0051536];NADH dehydrogenase (ubiquinone) activity [GO:0008137]	29	0	213.99	7864100000	88	8.2	3.5	3.5	3.5	B9DFQ9	B9DFQ9	437	EMB1467	AT5G37510 protein
268107833862305	271584625244141	268647861480713	268294143676758	cell wall organization [GO:0071555]	extracellular region [GO:0005576];plant-type cell wall [GO:0009505]	carboxylic ester hydrolase activity [GO:0052689];pectin acetylesterase activity [GO:0052793]	7	0	54.698	1939800000	36	18.8	12.9	12.2	12.2	B9DFR3	B9DFR3	438	PAE9	Pectin acetylesterase 9
304996204376221	305098476409912	304715023040771	30524866104126	cysteine biosynthetic process [GO:0019344];cysteine biosynthetic process from serine [GO:0006535];double fertilization forming a zygote and endosperm [GO:0009567];pollen tube development [GO:0048868];pollen tube growth [GO:0009860]	chloroplast [GO:0009507];chloroplast stroma [GO:0009570];cytosol [GO:0005829];mitochondrion [GO:0005739]	ATP binding [GO:0005524];cysteine synthase activity [GO:0004124];lyase activity [GO:0016829];zinc ion binding [GO:0008270]	41	0	323.31	35397000000	496	62.4	63.5	67.7	67.2	B9DFR6	B9DFR6	439	OASC	Cysteine synthase
NaN	246937046051025	NaN	231303291320801	developmental process [GO:0032502];late endosome to vacuole transport [GO:0045324];protein maturation [GO:0051604];protein transport [GO:0015031];seedling development [GO:0090351];vesicle-mediated transport [GO:0016192]	cytosol [GO:0005829];Golgi apparatus [GO:0005794];membrane [GO:0016020];multivesicular body membrane [GO:0032585];retromer complex [GO:0030904]	phosphatidylinositol binding [GO:0035091];phospholipid binding [GO:0005543];protein heterodimerization activity [GO:0046982]	9	0	16.378	1352100000	25	0	5.2	0	3	B9DFS6	B9DFS6	440	SNX2B	Sorting nexin 2B
258708190917969	260808486938477	256709041595459	259772071838379			GTP binding [GO:0005525];hydrolase activity [GO:0016787]	2	0.0098522	1.4802	1299600000	16	1.7	1.7	1.7	1.7	B9DFZ2	B9DFZ2	441	MCK7.24	AT5G58370 protein
312069358825684	311523094177246	312483024597168	311819858551025	ribosomal small subunit assembly [GO:0000028];translation [GO:0006412]	cytosolic small ribosomal subunit [GO:0022627]	structural constituent of ribosome [GO:0003735]	24	0	323.31	176320000000	791	56.8	55.1	56.8	51	B9DG17	B9DG17	442	P40	40S ribosomal protein SA
266018714904785	262825260162354	26474739074707	265424747467041			transferase activity, transferring acyl groups [GO:0016746]	9	0	22.653	2913600000	43	17.5	14.4	12.9	22.1	B9DG63	B9DG63	443	At4g28030	AT4G28030 protein
327118225097656	326539268493652	327153053283691	326825675964355	acetate metabolic process [GO:0006083];acetyl-CoA biosynthetic process from acetate [GO:0019427];fatty acid metabolic process [GO:0006631]	chloroplast [GO:0009507];chloroplast stroma [GO:0009570];cytosol [GO:0005829];glyoxysome [GO:0009514]	acetate-CoA ligase activity [GO:0003987];AMP binding [GO:0016208];ATP binding [GO:0005524]	59	0	323.31	150960000000	890	61.1	52.9	59.2	52.6	B9DGD6	B9DGD6	444	ACS	Acetyl-coenzyme A synthetase, chloroplastic/glyoxysomal
246982173919678	NaN	NaN	246954574584961				4	0	5.3129	353970000	6	5.2	0	0	5.2	B9DGS8	B9DGS8	445	At1g14820	AT1G14820 protein
328737182617188	328974800109863	328986320495605	327114944458008	microtubule-based process [GO:0007017]	cytoplasm [GO:0005737];microtubule [GO:0005874]	GTP binding [GO:0005525];GTPase activity [GO:0003924];structural constituent of cytoskeleton [GO:0005200]	53	0	323.31	544360000000	1476	70.2	57.6	62.4	60.2	B9DGT7	B9DGT7	446	TUBA2	Tubulin alpha-2 chain
271442356109619	271693992614746	27202564239502	276341571807861	thiamine diphosphate biosynthetic process [GO:0009229];thiamine metabolic process [GO:0006772]	cytosol [GO:0005829]	ATP binding [GO:0005524];kinase activity [GO:0016301];thiamine binding [GO:0030975];thiamine diphosphokinase activity [GO:0004788]	10	0	83.605	3864700000	78	39	30.7	27.3	18.4	B9DGU7	B9DGU7	447	TPK1	Thiamine pyrophosphokinase 1
315756492614746	314555225372314	314484996795654	314799575805664	methylglyoxal catabolic process to D-lactate via S-lactoyl-glutathione [GO:0019243];response to cadmium ion [GO:0046686]	chloroplast [GO:0009507];cytosol [GO:0005829];extracellular region [GO:0005576]	lactoylglutathione lyase activity [GO:0004462];metal ion binding [GO:0046872]	24	0	323.31	48558000000	417	72.8	67.7	68.5	66.4	B9DH52	B9DH52	448	At1g08110	Lactoylglutathione lyase
251690559387207	252820301055908	249007186889648	250605621337891	coenzyme A biosynthetic process [GO:0015937]	cytosol [GO:0005829];nucleus [GO:0005634]	pantothenate kinase activity [GO:0004594]	15	0	10.11	442170000	15	24.1	26	16.1	16.1	B9DH75	B9DH75	449	At2g17320	AT2G17320 protein
237448883056641	237620258331299	241201286315918	237360343933105	endoplasmic reticulum membrane organization [GO:0090158];endoplasmic reticulum-plasma membrane tethering [GO:0061817];intracellular transport [GO:0046907];viral process [GO:0016032]	endoplasmic reticulum membrane [GO:0005789];extracellular region [GO:0005576];integral component of membrane [GO:0016021];plasma membrane [GO:0005886]		2	0.0048886	1.8544	278240000	16	2.3	2.3	2.3	2.3	B9DHD7	B9DHD7	451	PVA22	Vesicle-associated protein 2-2
NaN	NaN	241348476409912	234902038574219		cytosol [GO:0005829]		10	0	27.121	702970000	18	0	0	2.4	2.4	B9DHK3	B9DHK3	452	At5g14540	AT5G14540 protein
310647106170654	311031837463379	311793174743652	313591442108154	microtubule-based process [GO:0007017]	cytoplasm [GO:0005737];microtubule [GO:0005874]	GTP binding [GO:0005525];GTPase activity [GO:0003924];structural constituent of cytoskeleton [GO:0005200]	45	0	323.31	98789000000	551	72.9	65.8	65.3	66.4	B9DHQ0	B9DHQ0	453	TUBA5	Tubulin alpha-5 chain
262958087921143	26494176864624	261775016784668	26226282119751		integral component of membrane [GO:0016021];plasma membrane [GO:0005886]	ATP binding [GO:0005524];protein serine/threonine kinase activity [GO:0004674]	9	0	15.894	2226900000	49	4.1	1.7	3.4	3.1	C0LGD7	C0LGD7	454	At1g06840	Probable LRR receptor-like serine/threonine-protein kinase At1g06840
281675357818604	270976810455322	272141933441162	27223705291748		integral component of membrane [GO:0016021];membrane [GO:0016020];plasma membrane [GO:0005886]	ATP binding [GO:0005524];protein serine/threonine kinase activity [GO:0004674]	4	0.00094056	2.4799	2945500000	26	3.1	2.9	3.1	3.1	C0LGE4	C0LGE4	455	At1g12460	Probable LRR receptor-like serine/threonine-protein kinase At1g12460
258111019134521	263612174987793	259172058105469	260441017150879	protein autophosphorylation [GO:0046777]	integral component of membrane [GO:0016021];plasma membrane [GO:0005886]	ATP binding [GO:0005524];protein serine/threonine kinase activity [GO:0004674]	8	0	8.9923	1306100000	25	3.1	3.1	2	4.2	C0LGG8	C0LGG8	456	At1g53430	Probable LRR receptor-like serine/threonine-protein kinase At1g53430
253690299987793	257229137420654	251986541748047	2532350730896	protein autophosphorylation [GO:0046777]	integral component of membrane [GO:0016021];plasma membrane [GO:0005886]	ATP binding [GO:0005524];protein serine/threonine kinase activity [GO:0004674]	6	0	14.433	1580900000	32	0.9	0.9	2.9	1.6	C0LGH3	C0LGH3	457	At1g56140	Probable LRR receptor-like serine/threonine-protein kinase At1g56140
267612915039063	274450588226318	272058296203613	268531723022461	jasmonic acid and ethylene-dependent systemic resistance [GO:0009861];protein autophosphorylation [GO:0046777];regulation of innate immune response [GO:0045088]	cytosol [GO:0005829];integral component of membrane [GO:0016021];plasma membrane [GO:0005886];plasmodesma [GO:0009506]	ATP binding [GO:0005524];protein serine/threonine kinase activity [GO:0004674]	16	0	35.216	2664700000	70	7.1	12.4	7.6	4.8	C0LGN2	C0LGN2	459	LRR-RLK	Probable leucine-rich repeat receptor-like serine/threonine-protein kinase At3g14840
260442276000977	262348194122314	26472339630127	269232044219971	actin filament bundle assembly [GO:0051017]		actin filament binding [GO:0051015]	10	0	8.5699	3978000000	56	7.4	9	9.8	9	C0Z268	C0Z268	461	FIM1	AT4G26700 protein
275355663299561	282586269378662	27873966217041	277739181518555		chloroplast [GO:0009507]	ferredoxin-NADP+ reductase activity [GO:0004324]	44	0	11.126	2139700000	32	90.2	89.4	89	89	C0Z2A8	C0Z2A8	464	FNR2	Ferredoxin--NADP reductase, chloroplastic
285549011230469	284553260803223	28107292175293	281225776672363		cytosol [GO:0005829];extracellular region [GO:0005576];plasma membrane [GO:0005886]	hydrolase activity [GO:0016787]	10	0	38.334	5358500000	85	29.8	38	38	38	C0Z2J1	C0Z2J1	465	At1g11360	AT1G11360 protein
251254577636719	251606178283691	248081340789795	250691947937012		nucleus [GO:0005634]	DNA binding [GO:0003677]	3	0.0048913	1.8599	655090000	17	7.5	7.5	7.5	7.5	C0Z2P1	C0Z2P1	466	At1g74840	AT1G74840 protein
28519458770752	286574802398682	285391578674316	286210765838623	chaperone cofactor-dependent protein refolding [GO:0051085];protein folding [GO:0006457];protein refolding [GO:0042026]	chloroplast [GO:0009507];chloroplast stroma [GO:0009570];cytosol [GO:0005829];cytosolic ribosome [GO:0022626];mitochondrion [GO:0005739];plastid [GO:0009536]	ATP binding [GO:0005524]	79	0	323.31	28068000000	343	63.3	56.8	53.9	64	C0Z361	C0Z361	468	CPN60B3	Chaperonin 60 subunit beta 3, chloroplastic
222080955505371	237265033721924	223321876525879	223838214874268		cytosol [GO:0005829]	metal ion binding [GO:0046872];metalloendopeptidase activity [GO:0004222]	39	0	226.35	7476100000	149	1.7	3.6	1.7	0.9	F4HNU6	F4HNU6	519	At1g06900	Nardilysin-like
NaN	NaN	244563217163086	243729858398438			ATP binding [GO:0005524];protein kinase activity [GO:0004672]	10	0	30.593	1278400000	36	1	0	1.3	1.3	F4HPS0	F4HPS0	522	ATMAP4K ALPHA1	Protein kinase superfamily protein
2706640625	270828380584717	269825057983398	268384590148926	peptidyl-serine phosphorylation [GO:0018105];peptidyl-threonine phosphorylation [GO:0018107]	cytoplasm [GO:0005737];cytosol [GO:0005829];plasma membrane [GO:0005886]	ATP binding [GO:0005524];protein serine/threonine kinase activity [GO:0004674]	14	0	49.915	2990900000	36	1.1	1.1	1.1	1.1	F4HQ88	F4HQ88	525	At1g73460	Protein kinase superfamily protein
257519779205322	259065570831299	25716516494751	NaN	flower development [GO:0009908];histone methylation [GO:0016571];negative regulation of flower development [GO:0009910];transcription elongation from RNA polymerase II promoter [GO:0006368]	Cdc73/Paf1 complex [GO:0016593];nucleus [GO:0005634];transcriptionally active chromatin [GO:0035327]	chromatin binding [GO:0003682];RNA polymerase II complex binding [GO:0000993]	7	0	6.3469	1390600000	20	2	2	4.1	0	F4HQA1	F4HQA1	526	VIP2	Protein PAF1 homolog
271444301605225	273689460754395	266939182281494	269679622650146			hydrolase activity [GO:0016787]	8	0	12.366	2174700000	42	15.9	19.6	14.4	14.4	F4HQA8	F4HQA8	527	FHY1	Haloacid dehalogenase-like hydrolase (HAD) superfamily protein
308611221313477	309202537536621	308738632202148	308426609039307		cell wall [GO:0005618];cytosol [GO:0005829];mitochondrion [GO:0005739];nucleus [GO:0005634];plasma membrane [GO:0005886];plasmodesma [GO:0009506]	ATP binding [GO:0005524]	116	0	323.31	54686000000	732	83.3	86.6	87.7	80.7	F4HQD4	F4HQD4	528	HSP70-15	Heat shock 70 kDa protein 15
241254978179932	NaN	NaN	226573104858398	intracellular protein transport [GO:0006886];vesicle-mediated transport [GO:0016192]	COPI-coated vesicle membrane [GO:0030663];Golgi membrane [GO:0000139];membrane coat [GO:0030117]	structural molecule activity [GO:0005198]	41	0	243.76	8682300000	126	2.9	0.9	0.9	2.4	F4HQE7	F4HQE7	529	At1g79990	Coatomer subunit beta'
309985313415527	311756343841553	310646457672119	307228126525879	chloroplast rRNA processing [GO:1901259];regulation of RNA metabolic process [GO:0051252]	chloroplast [GO:0009507];chloroplast envelope [GO:0009941];chloroplast stroma [GO:0009570];chloroplast thylakoid membrane [GO:0009535];nucleus [GO:0005634];plastid [GO:0009536];ribonucleoprotein complex [GO:1990904]	mRNA binding [GO:0003729];RNA binding [GO:0003723]	25	0	150.77	24124000000	293	48.6	48	43.9	48	F4HQH8	F4HQH8	530	At1g01080	RNA-binding (RRM/RBD/RNP motifs) family protein
335853080749512	335536193847656	335728302001953	335322952270508			nucleotide binding [GO:0000166];oxidoreductase activity, acting on the aldehyde or oxo group of donors, NAD or NADP as acceptor [GO:0016620]	70	0	323.31	428630000000	1302	88.4	88.4	88.4	88.4	F4HQT1	F4HQT1	531	GAPC2	Glyceraldehyde-3-phosphate dehydrogenase C2
302842750549316	302394523620605	297652969360352	297494163513184				23	0	160.2	10718000000	179	45	45	42.5	42.5	F4HR91	F4HR91	533	At1g33610	Leucine-rich repeat (LRR) family protein
219507007598877	NaN	2182985496521	NaN				1	0.0013077	2.3395	66375000	6	5.9	0	5.9	0	F4HRD2	F4HRD2	534	At1g45230	DCL protein (DUF3223)
229183254241943	228064441680908	229728984832764	228730506896973				3	0	9.5236	391950000	16	4	4	4	4	F4HRG2	F4HRG2	535	At1g53345	DHHA1 domain protein
NaN	252715969085693	NaN	257364482879639	carbohydrate metabolic process [GO:0005975];ethylene biosynthetic process [GO:0009693];regulation of ethylene biosynthetic process [GO:0010364];regulation of leaf senescence [GO:1900055];starch metabolic process [GO:0005982];trehalose metabolic process [GO:0005991]	cytosol [GO:0005829]		24	0	65.442	3877900000	66	0	1.1	0	0.8	F4HRS2	F4HRS2	537	SWEETIE	Protein SWEETIE
250150375366211	277220153808594	264275989532471	265750064849854	nucleus organization [GO:0006997];regulation of nucleus size [GO:0097298]	cytoplasmic chromatin [GO:0000789];cytosol [GO:0005829];mitochondrion [GO:0005739];nuclear envelope [GO:0005635];nuclear lamina [GO:0005652];nuclear membrane [GO:0031965];nuclear periphery [GO:0034399];nucleoplasm [GO:0005654];nucleus [GO:0005634]		30	0	110.28	10317000000	97	3.5	2.4	2.2	4.4	F4HRT5	F4HRT5	538	CRWN1	Protein CROWDED NUCLEI 1
307386817932129	307159576416016	307379570007324	306715183258057	carbohydrate metabolic process [GO:0005975];glycerol-3-phosphate metabolic process [GO:0006072]		glycerol kinase activity [GO:0004370]	47	0	323.31	54295000000	625	68	62.7	66.4	65.6	F4HS76	F4HS76	539	NHO1	Actin-like ATPase superfamily protein
286867561340332	288479862213135	288389701843262	288154640197754		cytoplasm [GO:0005737];cytosol [GO:0005829];extracellular region [GO:0005576];nucleus [GO:0005634]		49	0	161.2	10927000000	282	14.2	17.6	18.4	15.7	F4HS99	F4HS99	540	At1g01320	Tetratricopeptide repeat (TPR)-like superfamily protein
224856662750244	232323513031006	245495719909668	NaN	tRNA pseudouridine synthesis [GO:0031119]		pseudouridine synthase activity [GO:0009982];RNA binding [GO:0003723]	8	0	17.903	1074500000	30	3.4	3.4	5	0	F4HSS8	F4HSS8	543	At1g20410	Pseudouridine synthase family protein
226230583190918	258940258026123	259599838256836	260380420684814	negative regulation of defense response to bacterium, incompatible interaction [GO:1902478]		GTP binding [GO:0005525]	5	0	14.688	899850000	24	7	7.3	10.2	9.9	F4HT21	F4HT21	545	IAN9	Immune-associated nucleotide-binding protein 9
NaN	244895305633545	247067775726318	249370574951172	DNA replication initiation [GO:0006270]	alpha DNA polymerase:primase complex [GO:0005658];mitochondrion [GO:0005739]	DNA binding [GO:0003677]	14	0	30.691	1733100000	36	1.3	1.8	8.1	4.5	F4HTP2	F4HTP2	546	POLA2	DNA polymerase alpha subunit B
244696102142334	NaN	248312759399414	249140605926514				3	0	5.6952	694800000	16	1.5	0	4.4	5.1	F4HTR6	F4HTR6	548	At1g67800	Copine (Calcium-dependent phospholipid-binding protein) family
306518135070801	307164478302002	305080528259277	296113300323486		chloroplast [GO:0009507];chloroplast thylakoid [GO:0009534];mitochondrion [GO:0005739]	peptidyl-prolyl cis-trans isomerase activity [GO:0003755]	19	0	261.34	18339000000	180	35.6	41.3	36.9	43.2	F4HTT6	F4HTT6	549	CYP26-2	Peptidyl-prolyl cis-trans isomerase CYP26-2, chloroplastic
242529201507568	NaN	246862964630127	NaN	endoplasmic reticulum to Golgi vesicle-mediated transport [GO:0006888]	cytoplasm [GO:0005737];mitochondrion [GO:0005739];nucleus [GO:0005634];TRAPP complex [GO:0030008]		4	0	5.8748	680040000	12	11.1	0	11.1	0	F4HTY0	F4HTY0	550	At1g80500	SNARE-like superfamily protein
291619491577148	2924440574646	292975635528564	292218647003174	acyl-CoA metabolic process [GO:0006637];fatty acid catabolic process [GO:0009062]	peroxisome [GO:0005777]	acyl-CoA hydrolase activity [GO:0047617]	20	0	64.273	8787900000	207	46.4	44.3	38.2	41.7	F4HU51	F4HU51	551	At1g01710	Acyl-CoA thioesterase II
277429103851318	282895164489746	281609649658203	281198120117188	peptidyl-lysine monomethylation [GO:0018026]		protein-lysine N-methyltransferase activity [GO:0016279]	7	0	12.231	5444300000	36	3.8	3.8	3.8	3.8	F4HU79	F4HU79	552	At1g01920	SET domain-containing protein
277341499328613	279105072021484	275446586608887	275422973632813	RNA catabolic process [GO:0006401]	extracellular region [GO:0005576];secretory vesicle [GO:0099503]	endoribonuclease activity [GO:0004521];ribonuclease T2 activity [GO:0033897];RNA binding [GO:0003723]	12	0	59.881	5341600000	120	28.7	22.3	29.6	29.6	F4HUG9	F4HUG9	554	At1g14210	Ribonuclease T2 family protein
254780311584473	23743143081665	253258762359619	258647403717041	fatty acid metabolic process [GO:0006631]	peroxisome [GO:0005777]	ligase activity [GO:0016874]	8	0	7.277	1417500000	32	3.1	1.4	3.1	3.1	F4HUK6	F4HUK6	555	AAE1	Probable acyl-activating enzyme 1, peroxisomal
310206871032715	310738677978516	295688457489014	309290294647217				10	0	6.5554	23931000000	19	0.8	1.6	2.9	2.5	F4HV50;REV__F4HV50	F4HV50	557	At1g47900	Filament-like protein (DUF869)
28070556640625	262267227172852	273126792907715	270490550994873			ATP binding [GO:0005524];helicase activity [GO:0004386];nucleic acid binding [GO:0003676]	50	0	243.24	25946000000	100	77.6	61.4	63.4	66.1	F4HV96	F4HV96	559	EIF4A-2	Eif4a-2
250602340698242	25609302520752	NaN	255028209686279	detection of redox state [GO:0051776];photosystem stoichiometry adjustment [GO:0080005];protein autophosphorylation [GO:0046777];regulation of gene expression [GO:0010468];regulation of photosynthesis [GO:0010109]	chloroplast [GO:0009507];chloroplast stroma [GO:0009570]	kinase activity [GO:0016301];protein histidine kinase activity [GO:0004673];protein self-association [GO:0043621];quinone binding [GO:0048038]	7	0	36.094	915620000	33	4.7	9.3	2.6	6.2	F4HVG8	F4HVG8	560	CSK	Chloroplast sensor kinase, chloroplastic
209642333984375	203388671875	216097755432129	243075122833252	regulation of translation [GO:0006417]	CCR4-NOT core complex [GO:0030015]		73	0	323.31	18384000000	340	1.9	0.4	2.4	0.3	F4HVV7;REV__F4JCM5	F4HVV7	561	At1g02080	Transcription regulator
NaN	265239658355713	253094215393066	265127849578857		cytosol [GO:0005829]	mRNA binding [GO:0003729]	11	0	21.479	2117400000	30	0	2.5	4.5	2.5	F4HWB0	F4HWB0	563	At1g14710	Hydroxyproline-rich glycoprotein family protein
283717308044434	28409366607666	283140201568604	283750514984131		integral component of membrane [GO:0016021];plasma membrane [GO:0005886];vacuole [GO:0005773]	mRNA binding [GO:0003729]	17	0	26.125	7847400000	118	6.7	8	7.6	8.7	F4HWC3	F4HWC3	564	At1g20970	Calponin-like domain protein
301739082336426	30181510925293	300846138000488	30134916305542	tRNA aminoacylation for protein translation [GO:0006418]	cytosol [GO:0005829]	ATP binding [GO:0005524];tyrosine-tRNA ligase activity [GO:0004831]	39	0	113.02	22573000000	286	32.1	28.1	34.5	34.5	F4HWL4	F4HWL4	566	At1g28350	Tyrosine--tRNA ligase 2, cytoplasmic
244476470947266	255081214904785	253489818572998	249022846221924			mRNA binding [GO:0003729]	7	0	15.692	923000000	17	4.1	4.1	4.1	2.5	F4HWS5	F4HWS5	567	ECT7	Evolutionarily conserved C-terminal region 7
297732276916504	296572761535645	295557613372803	296897087097168	endosome to plasma membrane protein transport [GO:0099638];multivesicular body organization [GO:0036257];protein transport to vacuole involved in ubiquitin-dependent protein catabolic process via the multivesicular body sorting pathway [GO:0043328];vacuole organization [GO:0007033]	cytoplasm [GO:0005737];cytosol [GO:0005829];late endosome [GO:0005770];multivesicular body [GO:0005771];plasmodesma [GO:0009506]	protein self-association [GO:0043621];ubiquitin binding [GO:0043130]	46	0	280.6	24013000000	370	30	29.2	30.9	24.9	F4HXZ1	F4HXZ1	569	BRO1	Vacuolar-sorting protein BRO1
266766719818115	257476043701172	NaN	NaN	embryo development ending in seed dormancy [GO:0009793];protein import [GO:0017038];protein targeting [GO:0006605]	chloroplast envelope [GO:0009941];membrane [GO:0016020];plastid [GO:0009536]	ATP binding [GO:0005524];metal ion binding [GO:0046872]	6	0.0013079	2.3436	1448600000	21	1.1	1.1	0	0	F4HY36	F4HY36	570	SECA2	Protein translocase subunit SecA
285295085906982	287486152648926	287628440856934	285992832183838				15	0	77.768	9915800000	50	4.3	4.3	3	6.6	F4HYA7	F4HYA7	571	At1g35220	FAM91 carboxy-terminus protein
23632007598877	NaN	NaN	239129638671875		cytoplasm [GO:0005737];nucleus [GO:0005634];perinuclear region of cytoplasm [GO:0048471]		8	0	21.227	1245700000	26	2.4	0	0	2.4	F4HYD7	F4HYD7	572	RANBPM	Ran-binding protein M homolog
3129909324646	314588985443115	314286212921143	314621696472168	D-cysteine catabolic process [GO:0019447];ethylene biosynthetic process [GO:0009693];response to cadmium ion [GO:0046686]	chloroplast [GO:0009507];cytosol [GO:0005829];mitochondrion [GO:0005739];nucleus [GO:0005634]	cobalt ion binding [GO:0050897];D-cysteine desulfhydrase activity [GO:0019148];hydrolase activity [GO:0016787]	30	0	323.31	42139000000	444	57.4	59.6	55.6	55.6	F4HYF3	F4HYF3	573	DCD	Bifunctional D-cysteine desulfhydrase/1-aminocyclopropane-1-carboxylate deaminase, mitochondrial
262730197906494	26606819152832	271848964691162	258607196807861			ATP binding [GO:0005524]	20	0	8.4414	3833700000	32	2.2	2.2	3.5	1.1	F4HZ82	F4HZ82	575	At1g02890	AAA-type ATPase family protein
301725978851318	302257289886475	30394172668457	301491622924805		chloroplast [GO:0009507];chloroplast envelope [GO:0009941];chloroplast stroma [GO:0009570];extracellular region [GO:0005576];mitochondrion [GO:0005739];plastid stroma [GO:0009532];thylakoid [GO:0009579]	serine-type endopeptidase activity [GO:0004252]	18	0	298.47	16867000000	187	42.4	38.6	38.6	28.4	F4HZE0	F4HZE0	577	At1g09130	ATP-dependent Clp protease proteolytic subunit
253507022857666	25108570098877	255243549346924	248915233612061	protein stabilization [GO:0050821];proteolysis [GO:0006508]	mitochondrion [GO:0005739];nucleus [GO:0005634]	aminopeptidase activity [GO:0004177];manganese ion binding [GO:0030145];metallopeptidase activity [GO:0008237];peptidase activity [GO:0008233]	6	0	15.601	1226600000	39	6.3	4.3	7.1	16.2	F4HZG9	F4HZG9	578	ICP55	Intermediate cleaving peptidase 55, mitochondrial
246409702301025	256429252624512	246806735992432	245988368988037		vacuole [GO:0005773]		13	0	22.572	1126300000	45	2.5	2.4	2.5	2.5	F4HZS8	F4HZS8	580	At1g22060	Sporulation-specific protein
255866622924805	258998889923096	258950881958008	258818264007568		host cell nucleus [GO:0042025];nucleus [GO:0005634]	zinc ion binding [GO:0008270]	6	0	13.975	888720000	48	2.7	4.4	2.7	4.4	F4I045	F4I045	582	At1g48950	C3HC zinc finger-like protein
236704444885254	240054740905762	244991130828857	25969367980957	2-oxoglutarate metabolic process [GO:0006103];aspartate metabolic process [GO:0006531];biosynthetic process [GO:0009058];cellular amino acid metabolic process [GO:0006520];glutamate metabolic process [GO:0006536]	cytoplasm [GO:0005737];cytosol [GO:0005829];nucleus [GO:0005634]	L-aspartate:2-oxoglutarate aminotransferase activity [GO:0004069];pyridoxal phosphate binding [GO:0030170]	19	0	101.64	8160200000	88	5.4	5.9	8.6	16.5	F4I0D4;P46646	F4I0D4	583	ASP4	Aspartate aminotransferase;Aspartate aminotransferase, cytoplasmic isozyme 2
282538566589355	271804447174072	275997447967529	267336330413818				9	0	5.2429	4276900000	39	5	7.9	9.8	6.9	F4I0I6	F4I0I6	584	At1g69030	BSD domain-containing protein
253934898376465	254680252075195	244982624053955	NaN	chloroplast organization [GO:0009658];etioplast organization [GO:0009662];plastid transcription [GO:0042793];regulation of transcription, DNA-templated [GO:0006355]	chloroplast nucleoid [GO:0042644];cytoplasm [GO:0005737];plastid-encoded plastid RNA polymerase complex [GO:0000427]	carbohydrate kinase activity [GO:0019200]	3	0	3.3802	540700000	13	3.4	4.7	1.5	2	F4I0K2	F4I0K2	585	FLN2	Fructokinase-like 2, chloroplastic
279584789276123	2820680809021	278935394287109	282833461761475				3	0	10.351	2109900000	22	11.3	24.7	24.7	24.7	F4I0N7	F4I0N7	586	GASA1	GAST1 protein homolog 1
283741397857666	2879665184021	287207431793213	285372333526611	leucyl-tRNA aminoacylation [GO:0006429]	chloroplast [GO:0009507];cytosol [GO:0005829];plasmodesma [GO:0009506]	aminoacyl-tRNA editing activity [GO:0002161];ATP binding [GO:0005524];leucine-tRNA ligase activity [GO:0004823]	109	0	323.31	72801000000	845	21.4	31.5	24.7	18.3	F4I116	F4I116	588	At1g09620	Leucine--tRNA ligase, cytoplasmic
262634353637695	263746776580811	265448799133301	267873096466064		nucleus [GO:0005634]	mRNA binding [GO:0003729]	18	0	237.15	7065600000	142	6.5	8.9	8.7	7.2	F4I1G1	F4I1G1	589	At1g29350	RNA polymerase II degradation factor-like protein (DUF1296)
NaN	268062419891357	NaN	267409839630127	histone acetylation [GO:0016573];regulation of DNA demethylation [GO:1901535];regulation of DNA methylation [GO:0044030]			16	0	41.514	3025900000	64	0	1.5	0	1.5	F4I1S8	F4I1S8	591	ELP2	Elongator protein 2
NaN	NaN	233263568878174	237986736297607	embryo development ending in seed dormancy [GO:0009793];mRNA transport [GO:0051028];protein import into nucleus [GO:0006606];RNA export from nucleus [GO:0006405];zygote asymmetric cell division [GO:0010070]	mitochondrion [GO:0005739];nuclear pore central transport channel [GO:0044613];nuclear pore nuclear basket [GO:0044615]	nuclear localization sequence binding [GO:0008139];structural constituent of nuclear pore [GO:0017056]	2	0	3.6518	527970000	7	0.9	0.9	1.8	1.8	F4I1T7	F4I1T7	592	NUP214	Nuclear pore complex protein NUP214
316341743469238	317463111877441	31760181427002	317891998291016		chloroplast [GO:0009507];cytoplasm [GO:0005737];cytosol [GO:0005829];mitochondrion [GO:0005739]	endopeptidase activity [GO:0004175];oligopeptidase activity [GO:0070012];serine-type endopeptidase activity [GO:0004252];serine-type exopeptidase activity [GO:0070008]	53	0	323.31	70260000000	848	51.6	42.6	48.2	48.8	F4I2A0	F4I2A0	593	At1g76140	Prolyl oligopeptidase family protein
NaN	NaN	23447961807251	237255687713623	embryo development ending in seed dormancy [GO:0009793];mRNA cis splicing, via spliceosome [GO:0045292];regulation of gene expression [GO:0010468]	cytoplasm [GO:0005737];nuclear speck [GO:0016607];nucleus [GO:0005634];spliceosomal complex [GO:0005681]		9	0	8.7913	624100000	16	0	0	1.3	1.3	F4I2J8	F4I2J8	595	CTN	Cactin
244538745880127	NaN	238557643890381	252227306365967	pseudouridine synthesis [GO:0001522];tRNA processing [GO:0008033]		pseudouridine synthase activity [GO:0009982];RNA binding [GO:0003723];tRNA pseudouridine synthase activity [GO:0106029]	4	0	3.1533	585820000	10	3.2	0	3.2	7	F4I2L0	F4I2L0	596	At1g09800	tRNA pseudouridine synthase
260671653747559	256087665557861	258173141479492	259368553161621		cytosol [GO:0005829]	hydrolase activity [GO:0016787]	9	0	6.0555	1311100000	20	22.1	21.5	20.2	9.9	F4I353	F4I353	600	At1g29840	Alpha/beta-Hydrolases superfamily protein
244086627960205	250048751831055	247780113220215	247763061523438	cellular response to heat [GO:0034605];mRNA processing [GO:0006397]	cytoplasmic stress granule [GO:0010494];cytosol [GO:0005829];nucleus [GO:0005634]	mRNA binding [GO:0003729];poly(A) binding [GO:0008143]	14	0	323.31	7062000000	88	5.8	8.5	8.3	5.8	F4I3B3	F4I3B3	603	RBP47A	Polyadenylate-binding protein RBP47A
297138633728027	297340202331543	298768367767334	298508338928223	response to oxidative stress [GO:0006979]	mitochondrion [GO:0005739];nucleus [GO:0005634];peroxisome [GO:0005777]	oxidoreductase activity [GO:0016491];zinc ion binding [GO:0008270]	31	0	107.99	14196000000	265	33.9	39.1	37.7	37.1	F4I3C3	F4I3C3	604	NQR	ARP protein (REF)
317115345001221	318817234039307	316746349334717	317126007080078		chloroplast [GO:0009507];chloroplast stroma [GO:0009570];cytoplasm [GO:0005737];nucleus [GO:0005634]	ATP binding [GO:0005524];ATPase activity [GO:0016887];GTP binding [GO:0005525];ribosomal large subunit binding [GO:0043023];ribosome binding [GO:0043022]	30	0	323.31	48319000000	480	76.5	72	73.6	68.6	F4I3J0	F4I3J0	605	At1g56050	Obg-like ATPase 1
NaN	251041355133057	249167499542236	NaN	biosynthetic process [GO:0009058];cell division [GO:0051301];chloroplast fission [GO:0010020];chloroplast organization [GO:0009658];regulation of cell shape [GO:0008360]	chloroplast [GO:0009507];chloroplast nucleoid [GO:0042644]	acid-amino acid ligase activity [GO:0016881];ATP binding [GO:0005524]	6	0	7.1713	299550000	6	0	3.5	2.8	0	F4I3P9	F4I3P9	607	MURE	UDP-N-acetylmuramoyl-L-alanyl-D-glutamate--2,6-diaminopimelate ligase MurE homolog, chloroplastic
34835075378418	349852409362793	349010009765625	348819885253906	response to cadmium ion [GO:0046686]	apoplast [GO:0048046];chloroplast [GO:0009507];chloroplast envelope [GO:0009941];chloroplast stroma [GO:0009570];cytosol [GO:0005829];nucleus [GO:0005634];plasma membrane [GO:0005886];vacuole [GO:0005773]	metallopeptidase activity [GO:0008237];zinc ion binding [GO:0008270]	119	0	323.31	465150000000	2778	75.1	83.2	82.8	82.5	F4I3R1	F4I3R1	608	At1g63770	Peptidase M1 family protein
307928104400635	310808715820313	308577899932861	30836353302002		mitochondrion [GO:0005739];plasma membrane [GO:0005886]	GTP binding [GO:0005525];GTPase activity [GO:0003924];translation initiation factor activity [GO:0003743]	44	0	323.31	73332000000	285	12.1	11.8	14.8	10.7	F4I420	F4I420	609	At1g76810	Eukaryotic translation initiation factor 2 (eIF-2) family protein
259657402038574	264055500030518	260275554656982	262550106048584			Hsp90 protein binding [GO:0051879]	8	0	11.221	1880200000	30	13.9	13.9	13.9	17.2	F4I456	F4I456	610	TPR2	Tetratricopeptide repeat (TPR)-like superfamily protein
240730018615723	237313804626465	238405742645264	24466625213623		plasma membrane [GO:0005886]	S100 protein binding [GO:0044548];tubulin binding [GO:0015631];ubiquitin protein ligase binding [GO:0031625]	2	0	3.8032	241380000	9	4.4	4.4	10.5	10.5	F4I4Q9	F4I4Q9	612	At1g30070	SGS domain-containing protein
260517139434814	25741678237915	259615516662598	257412147521973			ATP binding [GO:0005524];protein serine/threonine kinase activity [GO:0004674];protein-containing complex binding [GO:0044877]	14	0	28.246	1640200000	33	0.7	1	1.1	0.7	F4I4X6	F4I4X6	613	TOR	Serine/threonine-protein kinase TOR
23734691619873	NaN	238932838439941	237719306945801			ATP binding [GO:0005524];hydrolase activity [GO:0016787]	18	0	15.415	557170000	22	1.8	0	1.8	1.8	F4I4Y5	F4I4Y5	614	At1g50140	p-loop containing nucleoside triphosphate hydrolases superfamily protein
259473514556885	255598754882813	265785961151123	267942676544189	ubiquitin-dependent protein catabolic process [GO:0006511]	cytosol [GO:0005829];plasma membrane [GO:0005886]	ATP binding [GO:0005524];ubiquitin-protein transferase activity [GO:0004842]	8	0	26.836	2763400000	28	40.5	40.5	40.5	40.5	F4I5B8	F4I5B8	616	UBC28	Ubiquitin-conjugating enzyme 28
279594745635986	280651226043701	279944248199463	280550689697266	DNA repair [GO:0006281];mRNA splicing, via spliceosome [GO:0000398]	Prp19 complex [GO:0000974]	ubiquitin protein ligase activity [GO:0061630]	28	0	91.359	8810000000	175	14.9	15.7	20.5	14.7	F4I5P3	F4I5P3	617	MAC3A	MOS4-associated complex 3A
248474235534668	248899478912354	246882724761963	248446979522705	regulation of phosphoprotein phosphatase activity [GO:0043666]	vacuolar membrane [GO:0005774]	protein phosphatase binding [GO:0019903];protein phosphatase regulator activity [GO:0019888]	35	0	205.66	12298000000	167	1.8	2.3	1.8	1.7	F4I6B2	F4I6B2	619	At1g30470	SIT4 phosphatase-associated family protein
219872856140137	NaN	259758529663086	224800052642822	CTP biosynthetic process [GO:0006241];'de novo' CTP biosynthetic process [GO:0044210];glutamine metabolic process [GO:0006541];pyrimidine nucleobase biosynthetic process [GO:0019856]	cytosol [GO:0005829]	ATP binding [GO:0005524];CTP synthase activity [GO:0003883];identical protein binding [GO:0042802]	24	0	78.977	4102300000	91	4.3	0	2	4.3	F4I6G9	F4I6G9	620	At1g30820	CTP synthase
334441871643066	334885520935059	334491157531738	334494857788086	biosynthetic process [GO:0009058];cellular response to hypoxia [GO:0071456];L-alanine catabolic process, by transamination [GO:0019481];response to cadmium ion [GO:0046686];response to hypoxia [GO:0001666]	mitochondrion [GO:0005739];nucleus [GO:0005634]	ATP binding [GO:0005524];L-alanine:2-oxoglutarate aminotransferase activity [GO:0004021];pyridoxal phosphate binding [GO:0030170]	48	0	323.31	203960000000	1108	60	53.2	51.7	57.5	F4I7I0	F4I7I0	623	ALAAT1	Alanine aminotransferase 1, mitochondrial
308245658874512	307542190551758	30804859161377	309139919281006	iron ion homeostasis [GO:0055072];iron ion transport [GO:0006826]	apoplast [GO:0048046];cell wall [GO:0005618];plasma membrane [GO:0005886];plasmodesma [GO:0009506];secretory vesicle [GO:0099503]	copper ion binding [GO:0005507];ferroxidase activity [GO:0004322]	20	0	222.07	24369000000	272	23.1	27.1	26.6	29	F4I7X1	F4I7X1	624	SKS6	SKU5-similar 6
233473281860352	NaN	235646514892578	233458385467529	cell wall organization [GO:0071555]	extracellular region [GO:0005576];plant-type cell wall [GO:0009505]	carboxylic ester hydrolase activity [GO:0052689];pectin acetylesterase activity [GO:0052793]	5	0	5.8026	223390000	14	5.9	0	2.7	3.2	F4I839	F4I839	625	PAE2	Pectin acetylesterase 2
26778938293457	2689723777771	273011226654053	251418800354004	reciprocal meiotic recombination [GO:0007131]	chloroplast [GO:0009507];microtubule associated complex [GO:0005875]		30	0	67.882	6231100000	95	5	6.5	7	3.1	F4I8B9	F4I8B9	626	At1g65010	Putative WEB family protein At1g65010, chloroplastic
318190937042236	318180274963379	312562561035156	312325496673584		chloroplast [GO:0009507];chloroplast stroma [GO:0009570]	glyoxylate reductase (NADP) activity [GO:0030267];NAD binding [GO:0051287];NADP binding [GO:0050661];oxidoreductase activity, acting on the CH-OH group of donors, NAD or NADP as acceptor [GO:0016616]	31	0	323.31	40163000000	396	61.5	69.6	73.2	59.5	F4I907	F4I907	628	GLYR2	Glyoxylate/succinic semialdehyde reductase 2, chloroplastic
268605308532715	268717346191406	266374092102051	267601490020752	regulation of transcription, DNA-templated [GO:0006355]	nucleus [GO:0005634]	transcription corepressor activity [GO:0003714]	7	0	6.5559	2094300000	8	0.8	0.8	0.8	0.8	F4I962	F4I962	629	SNL3	SIN3-like 3
246187973022461	267259845733643	267775611877441	269611320495605				21	0	150.97	3765700000	72	2.3	1.3	1.3	1.3	F4I983	F4I983	630	At1g24300	GYF domain-containing protein
282980213165283	282995510101318	279849510192871	283383693695068	mRNA processing [GO:0006397];mRNA transport [GO:0051028];nuclear-transcribed mRNA catabolic process, nonsense-mediated decay [GO:0000184];positive regulation of gene expression [GO:0010628];regulation of alternative mRNA splicing, via spliceosome [GO:0000381];regulation of translation [GO:0006417];RNA splicing [GO:0008380]	cytoplasm [GO:0005737];cytosol [GO:0005829];exon-exon junction complex [GO:0035145];nuclear body [GO:0016604];nuclear speck [GO:0016607];nucleolus [GO:0005730];nucleoplasm [GO:0005654];nucleus [GO:0005634]	mRNA binding [GO:0003729]	6	0	34.505	8308700000	86	28.2	23.3	23.3	23.3	F4I9J7	F4I9J7	632	Y14	RNA-binding protein Y14
217141456604004	NaN	220579128265381	NaN	modification-dependent protein catabolic process [GO:0019941];protein ubiquitination [GO:0016567];ubiquitin-dependent protein catabolic process [GO:0006511]	cytoplasm [GO:0005737];nucleus [GO:0005634]	protein tag [GO:0031386];ubiquitin protein ligase binding [GO:0031625]	19	0.007789	1.5515	155760000	2	77.4	75.5	77.4	75.5	F4I9X6	F4I9X6	635	UBQ13	Ubiquitin 13
244600772857666	250154628753662	248740367889404	249272346496582	phosphatidylinositol dephosphorylation [GO:0046856]		hydrolase activity [GO:0016787]	3	0.0020325	2.1656	761240000	7	1.7	1.7	3.1	1.7	F4IA20	F4IA20	636	At1g71710	DNAse I-like superfamily protein
242244968414307	248552875518799	250138874053955	238647632598877	adenine salvage [GO:0006168];GMP salvage [GO:0032263];guanine metabolic process [GO:0046098];guanine salvage [GO:0006178];hypoxanthine metabolic process [GO:0046100];IMP salvage [GO:0032264];purine ribonucleoside salvage [GO:0006166];seed germination [GO:0009845]	cytosol [GO:0005829]	guanine phosphoribosyltransferase activity [GO:0052657];hypoxanthine phosphoribosyltransferase activity [GO:0004422];magnesium ion binding [GO:0000287];nucleotide binding [GO:0000166]	3	0	11.851	535710000	18	11.6	19.2	13.1	13.1	F4IA25	F4IA25	637	HGPT	Hypoxanthine phosphoribosyltransferase
249379119873047	258372325897217	252777099609375	259915733337402	methylation [GO:0032259]		methyltransferase activity [GO:0008168]	6	0	50.453	1055500000	10	17.2	21.1	16.8	6.3	F4IA48	F4IA48	638	At1g78150	N-lysine methyltransferase
NaN	235789985656738	242893314361572	240959529876709	starch biosynthetic process [GO:0019252]	chloroplast [GO:0009507]	glycogen (starch) synthase activity [GO:0004373];starch binding [GO:2001070];starch synthase activity [GO:0009011]	4	0	4.4516	244470000	7	0.9	1.7	1.7	1.7	F4IAG1	F4IAG1	641	SS3	Starch synthase 3
29103120803833	291424350738525	294977931976318	291241073608398	amine metabolic process [GO:0009308]	nucleus [GO:0005634]	copper ion binding [GO:0005507];primary amine oxidase activity [GO:0008131];quinone binding [GO:0048038]	21	0	89.202	8564400000	160	24.7	26.7	24.5	21.9	F4IAX0	F4IAX0	644	At1g31690	Amine oxidase
284016571044922	2849094581604	285405616760254	284488048553467		integral component of membrane [GO:0016021];nucleus [GO:0005634]	ATP binding [GO:0005524];protein kinase activity [GO:0004672]	16	0	53.876	8996200000	115	14.8	11	12.2	11.3	F4IB63	F4IB63	646	At1g51805	Leucine-rich repeat protein kinase family protein
NaN	254139652252197	NaN	252091445922852			kinase activity [GO:0016301]	10	0	43.209	4795900000	39	0	3.4	0	11.6	F4IB68	F4IB68	647	At1g51840	Kinase-like protein
276248455047607	275528869628906	276325626373291	276952457427979		chloroplast [GO:0009507];cytoplasm [GO:0005737]	intramolecular transferase activity, phosphotransferases [GO:0016868]	16	0	32.761	5183000000	121	24.2	14.6	13.7	19	F4IBB2	F4IBB2	650	At1g58280	Phosphoglycerate mutase-like protein 2
270185012817383	269027671813965	266627521514893	269697189331055	oxidation-reduction process [GO:0055114]	nucleus [GO:0005634]		8	0	5.7288	2865500000	25	16.3	12	14	9.7	F4IBH8	F4IBH8	651	At1g65560	Zinc-binding dehydrogenase family protein
318114967346191	317743911743164	318174171447754	317168579101563			gamma-glutamyl-peptidase activity [GO:0034722]	25	0	323.31	69322000000	471	56.2	64.6	61.3	58	F4IBT7	F4IBT7	652	GGH2	Folate gamma-glutamyl hydrolase
306550598144531	304479579925537	30676570892334	307285823822021	carbohydrate metabolic process [GO:0005975];pentose-phosphate shunt, non-oxidative branch [GO:0009052]	chloroplast [GO:0009507];chloroplast envelope [GO:0009941];chloroplast stroma [GO:0009570];extracellular region [GO:0005576]	sedoheptulose-7-phosphate:D-glyceraldehyde-3-phosphate glyceronetransferase activity [GO:0004801];zinc ion binding [GO:0008270]	22	0	240.92	27220000000	257	31.9	37.2	36.1	38.9	F4IC59	F4IC59	653	At1g12230	Aldolase superfamily protein
NaN	244776611328125	241806354522705	NaN	microtubule-based movement [GO:0007018];regulation of microtubule-based process [GO:0032886];root development [GO:0048364]	microtubule [GO:0005874];preprophase band [GO:0009574]	ATP binding [GO:0005524];microtubule binding [GO:0008017];microtubule motor activity [GO:0003777]	5	0	8.442	451000000	10	0	1	1	0	F4IC87	F4IC87	654	ARK3	Kinesin-like protein
277252044677734	282708396911621	279802188873291	283190689086914		endosome [GO:0005768];Golgi apparatus [GO:0005794];integral component of membrane [GO:0016021];membrane [GO:0016020];plasma membrane [GO:0005886];trans-Golgi network [GO:0005802];vacuole [GO:0005773]		9	0	24.981	4548900000	103	9.9	11.6	11.6	11.6	F4ICJ5	F4ICJ5	655	At1g25570	Di-glucose binding protein with Leucine-rich repeat domain-containing protein
182484550476074	184866771697998	174634761810303	171576824188232	defense response to fungus [GO:0050832];photomorphogenesis [GO:0009640]	chloroplast thylakoid membrane [GO:0009535];endoplasmic reticulum lumen [GO:0005788];nuclear envelope [GO:0005635];peroxisome [GO:0005777];secretory vesicle [GO:0099503];vacuole [GO:0005773]	calcium ion binding [GO:0005509]	21	0	118.8	1898400000	56	5.7	5.7	3.6	3.6	F4ICX9	F4ICX9	656	TSA1	TSK-associating protein 1
271141624450684	271704502105713	275525207519531	279238834381104			transferase activity, transferring acyl groups other than amino-acyl groups [GO:0016747]	4	0	24.133	2717000000	7	6.6	1.5	6.6	1.5	F4IDH0	F4IDH0	658	YUP8H12R.39	HXXXD-type acyl-transferase family protein
249373722076416	248776435852051	245799198150635	245537967681885		nucleus [GO:0005634]	chromatin binding [GO:0003682]	13	0	21.155	2964700000	39	1	1	1	0.8	F4IDJ0	F4IDJ0	659	YUP8H12R.24	Binding protein
NaN	223671436309814	21412712097168	NaN	biosynthetic process [GO:0009058]		isochorismate synthase activity [GO:0008909]	13	0	30.742	1680700000	28	0	2.1	1.8	0	F4IDX8;Q9S7H8	F4IDX8	662	ICS2	Isochorismate synthase 2
23594913482666	236836757659912	NaN	235850868225098	ubiquinone biosynthetic process [GO:0006744]	mitochondrial inner membrane [GO:0005743];mitochondrion [GO:0005739];nucleus [GO:0005634]	lipid binding [GO:0008289]	4	0	4.4961	362320000	18	10.6	2.9	0	2.9	F4IE14	F4IE14	663	At1g19140	Ubiquinone biosynthesis protein
254550361633301	24869478225708	NaN	249982604980469	heat acclimation [GO:0010286];multicellular organism development [GO:0007275];nucleosome assembly [GO:0006334];nucleosome positioning [GO:0016584];positive regulation of cellular response to heat [GO:1900036];regulation of gene expression, epigenetic [GO:0040029];regulation of transcription, DNA-templated [GO:0006355];response to heat [GO:0009408]	cytosol [GO:0005829];nucleus [GO:0005634]	chromatin DNA binding [GO:0031490];histone binding [GO:0042393];metal ion binding [GO:0046872];promoter-specific chromatin binding [GO:1990841]	6	0.0059203	1.7121	553510000	7	1.3	1.3	0	1.3	F4IF36	F4IF36	666	FGT1	Protein FORGETTER 1
235985527038574	237610130310059	23420726776123	223468952178955	biosynthetic process [GO:0009058];regulation of L-ascorbic acid biosynthetic process [GO:2000082]		nucleotidyltransferase activity [GO:0016779]	18	0	56.238	4097300000	76	17.2	19	15.3	10.6	F4IFA4	F4IFA4	667	At2g04650	ADP-glucose pyrophosphorylase family protein
306024017333984	309065570831299	302321491241455	300769920349121				7	0	46.751	11823000000	63	47.3	47.3	47.3	47.3	F4IFA9	F4IFA9	668	At2g04690	Pyridoxamine 5'-phosphate oxidase family protein
272545776367188	272858619689941	269685115814209	272120609283447	embryo development ending in seed dormancy [GO:0009793];threonyl-tRNA aminoacylation [GO:0006435];tRNA aminoacylation for protein translation [GO:0006418]	chloroplast [GO:0009507];chloroplast stroma [GO:0009570];mitochondrion [GO:0005739]	aminoacyl-tRNA ligase activity [GO:0004812];ATP binding [GO:0005524];metal ion binding [GO:0046872];threonine-tRNA ligase activity [GO:0004829]	18	0	35.493	3281600000	81	15.8	14	16.3	11.8	F4IFC5	F4IFC5	669	EMB2761	Threonine--tRNA ligase, chloroplastic/mitochondrial 2
253434009552002	254607639312744	250234375	258935165405273		nucleus [GO:0005634]	transaminase activity [GO:0008483]	5	0	9.7231	987460000	23	7.3	10	3.7	7.3	F4IFD0	F4IFD0	670	At2g04865	Protein MAIN-LIKE 2
204810905456543	236976337432861	24229419708252	239936046600342			GTP binding [GO:0005525];GTPase activity [GO:0003924]	60	0	270.04	21949000000	311	3.3	2.4	5.4	2.9	F4IFG1	F4IFG1	671	DRP3B	Dynamin related protein
270537242889404	268569755554199	273704433441162	274493961334229		cytoplasm [GO:0005737]	aminopeptidase activity [GO:0004177]	29	0	34.355	2196500000	28	75.4	64.4	69	47.1	F4IFH2	F4IFH2	672	PIP	Proline iminopeptidase
238468017578125	243810634613037	242925643920898	247182178497314	endocytic recycling [GO:0032456];endocytosis [GO:0006897];endoplasmic reticulum organization [GO:0007029];endoplasmic reticulum-plasma membrane tethering [GO:0061817];plasma membrane repair [GO:0001778];protein targeting to membrane [GO:0006612];response to cold [GO:0009409];response to mechanical stimulus [GO:0009612];transport of virus in host, cell to cell [GO:0046740]	cortical endoplasmic reticulum [GO:0032541];cytoplasmic side of plasma membrane [GO:0009898];endoplasmic reticulum [GO:0005783];endoplasmic reticulum-plasma membrane contact site [GO:0140268];endosome [GO:0005768];plasma membrane [GO:0005886];plasmodesma [GO:0009506];vacuole [GO:0005773]	phosphatidylinositol phosphate binding [GO:1901981]	4	0	3.2295	440820000	9	1.2	1.2	1.2	1.2	F4IFM6	F4IFM6	673	SYTA	Synaptotagmin A
300227394104004	300191631317139	299310054779053	300762271881104		extracellular region [GO:0005576]	serine-type endopeptidase activity [GO:0004252]	40	0	227.41	27705000000	294	33.7	29.7	33.5	30.2	F4IG09	F4IG09	674	SBT4.1	Subtilisin-like protease SBT4.1
194748268127441	200836868286133	19024019241333	203130741119385				77	0	323.31	19677000000	381	0.3	0.3	1.6	1.2	F4IG73	F4IG73	675	BCHC2	BEACH domain-containing protein C2
280568790435791	29005521774292	28807071685791	28999002456665	mRNA transport [GO:0051028];nuclear pore distribution [GO:0031081];protein import into nucleus [GO:0006606];regulation of transcription, DNA-templated [GO:0006355];RNA export from nucleus [GO:0006405];transcription-dependent tethering of RNA polymerase II gene DNA at nuclear periphery [GO:0000972]	membrane [GO:0016020];nuclear pore outer ring [GO:0031080]	structural constituent of nuclear pore [GO:0017056]	16	0	16.196	8746700000	31	0.5	0.5	0.5	0.5	F4IGA5	F4IGA5	676	NUP133	Nuclear pore complex protein NUP133
257233047485352	267922840118408	252970161437988	239724617004395	rRNA processing [GO:0006364]	nucleolus [GO:0005730]		8	0	5.5013	1236800000	26	2.1	2.1	2.1	2	F4IHU8	F4IHU8	681	At2g34357	ARM repeat superfamily protein
286623783111572	287217216491699	287409839630127	285331916809082			ATP binding [GO:0005524];protein kinase activity [GO:0004672]	41	0	209.26	16050000000	297	21.8	25.1	21.4	17.9	F4II29	F4II29	682	CTEXP	Kinase family with ARM repeat domain-containing protein
264844074249268	25688325881958	258723697662354	264755439758301			UDP-glycosyltransferase activity [GO:0008194]	38	0	29.378	2154200000	54	29.1	32.6	38.1	32.2	F4IIG3	F4IIG3	685	UGT73B5	Glycosyltransferase
250594081878662	257102756500244	244514255523682	246162757873535	anisotropic cell growth [GO:0051211];anther dehiscence [GO:0009901];cellulose biosynthetic process [GO:0030244];cellulose microfibril organization [GO:0010215];cortical microtubule organization [GO:0043622];gynoecium development [GO:0048467];plant-type primary cell wall biogenesis [GO:0009833];pollen tube development [GO:0048868];pollen wall assembly [GO:0010208];protein localization to cortical …	cellulose synthase complex [GO:0010330];cortical microtubule [GO:0055028];cytoplasm [GO:0005737];cytoplasmic side of plasma membrane [GO:0009898];cytosol [GO:0005829];Golgi apparatus [GO:0005794];microtubule minus-end [GO:0036449];plasma membrane [GO:0005886];plasmodesma [GO:0009506]	microtubule binding [GO:0008017]	73	0	323.31	21008000000	363	2	1.6	0.5	0.4	F4IIM1	F4IIM1	686	CSI1	Protein CELLULOSE SYNTHASE INTERACTIVE 1
263909339904785	232317218780518	23607723236084	264097156524658	regulation of phosphoprotein phosphatase activity [GO:0043666]		protein phosphatase binding [GO:0019903];protein phosphatase regulator activity [GO:0019888]	14	0	55.077	2769500000	41	2.5	2.5	1.3	2.5	F4IIN7	F4IIN7	687	At2g28360	SIT4 phosphatase-associated family protein
306695766448975	30549861907959	304342021942139	303823680877686	carbohydrate metabolic process [GO:0005975]		beta-galactosidase activity [GO:0004565];carbohydrate binding [GO:0030246]	43	0	323.31	22938000000	354	40.4	34	39	33	F4IIQ3	F4IIQ3	688	BGAL8	Beta-galactosidase
272546691894531	271814880371094	267477836608887	268951587677002	cell cycle [GO:0007049];cell division [GO:0051301];lateral root morphogenesis [GO:0010102];response to auxin [GO:0009733]	cortical microtubule [GO:0055028];phragmoplast [GO:0009524];plasma membrane [GO:0005886];plasmodesma [GO:0009506];preprophase band [GO:0009574]		23	0	33.241	3403400000	92	8.3	8.6	8.1	9.8	F4IIU4	F4IIU4	689	AIR9	187-kDa microtubule-associated protein AIR9
325428466796875	323877944946289	322382850646973	321809196472168			serine-type carboxypeptidase activity [GO:0004185]	21	0	323.31	58545000000	462	51.1	43.6	51.1	51.1	F4IKK4	F4IKK4	691	SNG1	Sinapoylglucose 1
244015197753906	241649971008301	248382186889648	245188732147217				6	0	6.709	346780000	5	21.5	21.5	16.2	16.2	F4IKL8	F4IKL8	692	At2g29310	NAD(P)-binding Rossmann-fold superfamily protein
303063907623291	303072605133057	305527038574219	304085178375244		cytosol [GO:0005829];peroxisome [GO:0005777]	oxidoreductase activity [GO:0016491]	18	0	323.31	22817000000	194	57.3	52.8	48.5	57.3	F4IKM1	F4IKM1	693	At2g29340	Tropinone reductase homolog At2g29340
NaN	NaN	267655963897705	263615188598633	microtubule-based movement [GO:0007018]	kinesin complex [GO:0005871];microtubule [GO:0005874]	ATP binding [GO:0005524];ATPase activity [GO:0016887];microtubule binding [GO:0008017];microtubule motor activity [GO:0003777]	3	0.0066024	1.6434	1837200000	2	0	0	1.6	1.6	F4IL57	F4IL57	694	KIN14I	Kinesin-like protein KIN-14I
NaN	21614501953125	21319372177124	213395195007324		cytosol [GO:0005829];mitochondrion [GO:0005739];nucleus [GO:0005634];plasma membrane [GO:0005886]		33	0	277.68	10997000000	160	0	1.6	1.8	1.6	F4IL68	F4IL68	695	At2g07360	SH3 domain-containing protein
248175811767578	NaN	25489315032959	237835674285889	protein maturation by iron-sulfur cluster transfer [GO:0097428]		iron-sulfur cluster binding [GO:0051536];structural molecule activity [GO:0005198]	2	0	8.4005	199160000	4	9.1	0	9.1	9.1	F4ILA9	F4ILA9	696	At2g16710	Iron-sulfur cluster biosynthesis family protein
234189262390137	235426235198975	2488623046875	229179248809814	mRNA processing [GO:0006397]	nucleus [GO:0005634]	RNA binding [GO:0003723]	13	0	83.393	3075600000	63	2	2	2	2	F4ILE0	F4ILE0	697	At2g16940	Splicing factor, CC1-like protein
247225494384766	230472679138184	241259708404541	231277656555176	anther wall tapetum development [GO:0048658];cellular response to reactive oxygen species [GO:0034614];chloroplast disassembly [GO:1904821];protein ubiquitination [GO:0016567];root development [GO:0048364]	cytoplasm [GO:0005737]	ubiquitin protein ligase activity [GO:0061630]	14	0	52.761	1247100000	37	3.3	1.3	1.3	4.3	F4ILG6	F4ILG6	698	PUB4	RING-type E3 ubiquitin transferase
27978364944458	2918577003479	286467418670654	286974678039551	microtubule-based movement [GO:0007018]		ATP binding [GO:0005524];microtubule binding [GO:0008017];microtubule motor activity [GO:0003777]	7	0	5.0343	6628800000	41	2	1.3	1.3	2	F4ILV6	F4ILV6	699	At2g36200	P-loop containing nucleoside triphosphate hydrolases superfamily protein
264483394622803	265474414825439	266566276550293	264601707458496	biosynthetic process [GO:0009058]		transferase activity [GO:0016740]	9	0	18.388	1893900000	83	20.7	15.2	8	11.1	F4IM97	F4IM97	700	At2g01220	Nucleotidylyl transferase superfamily protein
248311309814453	254697647094727	252174510955811	NaN	embryo development ending in seed dormancy [GO:0009793];rRNA processing [GO:0006364]	integral component of membrane [GO:0016021];Noc4p-Nop14p complex [GO:0030692];nuclear membrane [GO:0031965];nucleolus [GO:0005730];nucleoplasm [GO:0005654];small-subunit processome [GO:0032040]		4	0	11.109	344650000	12	2.1	2.1	2.1	0	F4IMH3	F4IMH3	701	NOC4	Protein NUCLEOLAR COMPLEX ASSOCIATED 4
NaN	245204925537109	243964328765869	NaN		mitochondrion [GO:0005739]	magnesium ion binding [GO:0000287]	7	0	47.088	5483200000	8	37.9	37.9	37.9	37.1	F4INE2	F4INE2	703	At2g07732	Ribulose bisphosphate carboxylase large chain, catalytic domain-containing protein
248163623809814	254594841003418	252419090270996	251294727325439			ribonuclease activity [GO:0004540];RNA binding [GO:0003723]	10	0	32.112	1979000000	47	1	1	1	1	F4INI6	F4INI6	705	EMB2763	Ribonuclease II family protein
297844734191895	295829429626465	296101341247559	296690349578857	post-embryonic root development [GO:0048528]	cytoplasm [GO:0005737];cytosol [GO:0005829];nucleus [GO:0005634];plasma membrane [GO:0005886]	calcium ion binding [GO:0005509]	22	0	279.58	16548000000	238	59.1	55.4	56.9	57.2	F4IP55	F4IP55	706	GRF9	General regulatory factor 9
NaN	241030158996582	249157028198242	247536354064941	endoplasmic reticulum to Golgi vesicle-mediated transport [GO:0006888];protein exit from endoplasmic reticulum [GO:0032527];protein maturation [GO:0051604];vesicle docking involved in exocytosis [GO:0006904]	cytoplasm [GO:0005737]		5	0	21.874	843930000	6	0	0.9	0.9	0.9	F4IP68	F4IP68	707	MAG2-interacting protein 3	Vesicle docking protein
258270893096924	260918636322021	259154052734375	261323585510254			RNA binding [GO:0003723]	8	0	10.657	1448500000	46	4.8	5.8	7.7	7.8	F4IP94	F4IP94	708	ML2	MEI2-like 2
235300521850586	281997127532959	23807544708252	278229274749756	phosphatidylinositol biosynthetic process [GO:0006661];pollen development [GO:0009555];vacuole organization [GO:0007033]	mitochondrion [GO:0005739];PAS complex [GO:0070772];vacuolar membrane [GO:0005774]		18	0	91.864	7677400000	116	1.1	2	1.1	2	F4IPA6	F4IPA6	709	At2g01690	ARM repeat superfamily protein
NaN	NaN	243279342651367	253327903747559			GTP binding [GO:0005525];GTPase activity [GO:0003924];translation elongation factor activity [GO:0003746]	27	0	166.26	9863900000	146	0	0	4.3	1.2	F4IPW4	F4IPW4	711	EMB2785	Elongation factor family protein
302294025421143	301838798522949	299820976257324	300492115020752	cristae formation [GO:0042407];cysteinyl-tRNA aminoacylation [GO:0006423];polar nucleus fusion [GO:0010197];regulation of programmed cell death [GO:0043067]	chloroplast [GO:0009507];chloroplast stroma [GO:0009570];cytoplasm [GO:0005737];cytosol [GO:0005829];mitochondrion [GO:0005739]	ATP binding [GO:0005524];cysteine-tRNA ligase activity [GO:0004817];metal ion binding [GO:0046872]	31	0	188.02	13954000000	270	44.8	43	44	41.4	F4IPY2	F4IPY2	712	SYCO	Cysteine--tRNA ligase, chloroplastic/mitochondrial
287318534851074	289274196624756	287729434967041	287037506103516	hydrogen peroxide catabolic process [GO:0042744];response to oxidative stress [GO:0006979]	extracellular region [GO:0005576]	heme binding [GO:0020037];metal ion binding [GO:0046872];peroxidase activity [GO:0004601]	20	0	139.72	9781200000	133	42.9	48.6	45.6	50.7	F4IQ05	F4IQ05	713	At2g37130	Peroxidase
272124328613281	277642059326172	276409969329834	273347511291504	miRNA loading onto RISC involved in gene silencing by miRNA [GO:0035280];protein import into nucleus [GO:0006606]	cytoplasm [GO:0005737];cytosol [GO:0005829];nuclear envelope [GO:0005635];nucleus [GO:0005634]	Ran GTPase binding [GO:0008536]	39	0	164.32	18806000000	261	9.7	10	10.3	9	F4IRR2	F4IRR2	718	SAD2	Importin beta-like SAD2
216647930145264	NaN	22968879699707	215117149353027	red or far-red light signaling pathway [GO:0010017]	endoplasmic reticulum [GO:0005783];Golgi apparatus [GO:0005794];plasma membrane [GO:0005886];vacuole [GO:0005773]	heme binding [GO:0020037]	9	0	13.385	1825400000	28	8.5	0	8.1	4.5	F4IRX7	F4IRX7	719	SOUL-1	SOUL heme-binding family protein
256644077301025	NaN	28358922958374	NaN	regulation of transcription, DNA-templated [GO:0006355];response to salt stress [GO:0009651];sodium ion homeostasis [GO:0055078]	cytosol [GO:0005829];nucleus [GO:0005634]	calcium ion binding [GO:0005509];nuclear receptor transcription coactivator activity [GO:0030374]	15	0	10.856	2917900000	31	1.5	3.2	1.6	2.4	F4IS91	F4IS91	720	RSA1	Protein SHORT ROOT IN SALT MEDIUM 1
258744354248047	262994632720947	261268177032471	263785533905029	methylation [GO:0032259]		methyltransferase activity [GO:0008168]	10	0	21.374	2288400000	47	5.1	11.8	9.6	9.8	F4IST0	F4IST0	722	At2g32160	S-adenosyl-L-methionine-dependent methyltransferases superfamily protein
260252342224121	261068134307861	260545520782471	260967578887939	methylation [GO:0032259]		S-adenosylmethionine-dependent methyltransferase activity [GO:0008757]	9	0	33.734	2214200000	33	7	9.8	9.8	5.6	F4IST2	F4IST2	723	At2g32170	S-adenosyl-L-methionine-dependent methyltransferases superfamily protein
306550598144531	308478221893311	307805042266846	308973522186279	defense response to fungus, incompatible interaction [GO:0009817];response to abscisic acid [GO:0009737];response to cadmium ion [GO:0046686]	endoplasmic reticulum [GO:0005783];membrane [GO:0016020];plasma membrane [GO:0005886]		119	0	323.31	37550000000	759	49.5	45.8	48.5	41.5	F4ISU2	F4ISU2	724	At2g32240	Early endosome antigen
279503803253174	264497890472412	271622142791748	275294723510742			pyridoxal phosphate binding [GO:0030170];transaminase activity [GO:0008483]	11	0	15.858	1286200000	27	26	17.4	23.7	29	F4ISY3	F4ISY3	725	AGT3	Alanine:glyoxylate aminotransferase 3
309147052764893	310123863220215	309055519104004	310202903747559		chloroplast [GO:0009507];chloroplast stroma [GO:0009570];cytosol [GO:0005829]		17	0	289.55	19469000000	228	46.4	48.8	46.4	46	F4IT21	F4IT21	726	At2g43945	Uncharacterized protein
NaN	235526237487793	NaN	234769191741943			ubiquitin-like modifier activating enzyme activity [GO:0008641]	6	0	4.333	290360000	6	0	9.4	2.4	4.8	F4ITQ5	F4ITQ5	728	AXL	AXR1-like protein
273225116729736	270842590332031	272745323181152	274392833709717			ATP binding [GO:0005524];metal ion binding [GO:0046872];phosphoprotein phosphatase activity [GO:0004721];protein kinase activity [GO:0004672]	2	0.0020336	2.1708	1838000000	3	2.7	1.9	1.9	1.9	F4IUD7	F4IUD7	729	At2g20050	Protein phosphatase 2C and cyclic nucleotide-binding/kinase domain-containing protein
258664150238037	258995895385742	264879055023193	265505561828613				4	0	44.104	1450300000	40	16.6	16.6	16.6	16.6	F4IUJ0	F4IUJ0	731	At2g26340	Uncharacterized protein
20570707321167	211286163330078	213155632019043	210097694396973	defense response to bacterium [GO:0042742];jasmonic acid mediated signaling pathway [GO:0009867];long-day photoperiodism [GO:0048571];nuclear-transcribed mRNA catabolic process, nonsense-mediated decay [GO:0000184];response to wounding [GO:0009611];salicylic acid mediated signaling pathway [GO:0009863]	cytoplasm [GO:0005737];exon-exon junction complex [GO:0035145];nucleolus [GO:0005730];perinuclear region of cytoplasm [GO:0048471];polysome [GO:0005844]	mRNA binding [GO:0003729]	22	0	45.534	2515700000	66	2.1	2.1	2.4	0.7	F4IUX6	F4IUX6	732	UPF2	Regulator of nonsense transcripts UPF2
295054054260254	294905624389648	292428855895996	297049388885498				21	0	127.47	12172000000	168	48	45	46.8	30.4	F4IV18	F4IV18	733	At2g44760	Dihydroorotate dehydrogenase (DUF3598)
251593475341797	NaN	NaN	229384765625	amyloplast organization [GO:0009660];cell division [GO:0051301];embryo development ending in seed dormancy [GO:0009793];embryonic axis specification [GO:0000578];endocytosis [GO:0006897];endosome organization [GO:0007032];late endosome to vacuole transport [GO:0045324];negative gravitropism [GO:0009959];phototropism [GO:0009638];protein targeting to vacuole [GO:0006623];receptor-mediated endocyto…	endoplasmic reticulum [GO:0005783];endosome membrane [GO:0010008];Golgi apparatus [GO:0005794];intracellular membrane-bounded organelle [GO:0043231];late endosome [GO:0005770];late endosome membrane [GO:0031902];peroxisome [GO:0005777];trans-Golgi network [GO:0005802];vacuolar membrane [GO:0005774];vacuole [GO:0005773]		12	0	18.097	1413300000	58	0.5	0	0.5	0.5	F4IVL6	F4IVL6	735	GRV2	DnaJ homolog subfamily C GRV2
226672420501709	228202037811279	230154628753662	229162483215332		commitment complex [GO:0000243];nuclear speck [GO:0016607];U2AF [GO:0089701];U2-type prespliceosome [GO:0071004]	poly-pyrimidine tract binding [GO:0008187];pre-mRNA 3'-splice site binding [GO:0030628]	1	0	3.296	176620000	21	1.1	1.1	1.1	1.1	F4IVU7	F4IVU7	736	At2g33435	RNA-binding (RRM/RBD/RNP motifs) family protein
302117595672607	284895687103271	292253398895264	306914558410645	pentose-phosphate shunt [GO:0006098];reductive pentose-phosphate cycle [GO:0019253];response to cadmium ion [GO:0046686]	chloroplast [GO:0009507];chloroplast stroma [GO:0009570];chloroplast thylakoid membrane [GO:0009535];cytosol [GO:0005829];plastid [GO:0009536]	metal ion binding [GO:0046872];transketolase activity [GO:0004802]	63	0	323.31	70350000000	366	39	36	33.6	30.6	F4IW47	F4IW47	739	TKL-2	Transketolase-2, chloroplastic
237842674255371	243058433532715	245925769805908	23966136932373	tRNA processing [GO:0008033];tRNA splicing, via endonucleolytic cleavage and ligation [GO:0006388]		NAD+ ADP-ribosyltransferase activity [GO:0003950];tRNA 2'-phosphotransferase activity [GO:0000215]	7	0	26.85	676040000	20	8.7	16.6	13.1	4.8	F4IW51	F4IW51	740	emb1067	RNA 2'-phosphotransferase, Tpt1 / KptA family
249784965515137	246188526153564	25146936416626	251004905700684		Golgi apparatus [GO:0005794];integral component of membrane [GO:0016021]	O-acetyltransferase activity [GO:0016413]	4	0	5.6533	493320000	24	6.2	9.8	13.2	6.2	F4IWA8	F4IWA8	741	TBL41	Protein trichome birefringence-like 41
253859081268311	250789966583252	254660968780518	NaN	ubiquitin-dependent protein catabolic process [GO:0006511]		ATP binding [GO:0005524];ubiquitin-protein transferase activity [GO:0004842]	6	0	9.2548	833080000	12	7	9	7	0	F4IWU7	F4IWU7	742	UBC14	Ubiquitin-conjugating enzyme 14
331821022033691	332399063110352	332768363952637	332948837280273	tricarboxylic acid cycle [GO:0006099]	cytosol [GO:0005829];mitochondrion [GO:0005739];oxoglutarate dehydrogenase complex [GO:0045252]	cobalt ion binding [GO:0050897];oxoglutarate dehydrogenase (succinyl-transferring) activity [GO:0004591];thiamine pyrophosphate binding [GO:0030976];zinc ion binding [GO:0008270]	110	0	323.31	251700000000	2173	63.5	61.9	64.9	63.1	F4IWV2	F4IWV2	743	At3g55410	2-oxoglutarate dehydrogenase, E1 component
231787509918213	215720977783203	NaN	227660579681396	Golgi to vacuole transport [GO:0006896];intracellular protein transport [GO:0006886];lytic vacuole organization [GO:0080171];regulation of intracellular pH [GO:0051453]	AP-3 adaptor complex [GO:0030123]		12	0	14.616	1338200000	43	2.1	0.8	0	1.3	F4IWW1	F4IWW1	744	PAT2	AP-3 complex subunit beta
273516979217529	2762233543396	272729320526123	272389965057373				32	0	60.29	7425300000	109	1.9	2.6	1.9	2.6	F4IX23	F4IX23	745	At3g62010	Metal ion-binding protein
243303298950195	226363086700439	243150653839111	244975929260254	proteasome assembly [GO:0043248]	plasmodesma [GO:0009506];vacuolar membrane [GO:0005774]		9	0	15.686	1199500000	31	3.3	5.4	3.3	3.3	F4IXH9	F4IXH9	747	At3g15180	ARM repeat superfamily protein
269815254211426	265265350341797	269860916137695	252720947265625	defense response to bacterium [GO:0042742];endocytosis [GO:0006897];immune response [GO:0006955];innate immune response [GO:0045087];protein transport [GO:0015031];regulation of ARF protein signal transduction [GO:0032012];vesicle-mediated transport [GO:0016192];viral process [GO:0016032]	cytosol [GO:0005829];early endosome [GO:0005769];early endosome membrane [GO:0031901];trans-Golgi network [GO:0005802]	ARF guanyl-nucleotide exchange factor activity [GO:0005086]	122	0	323.31	67001000000	685	9.8	11.2	9	10.1	F4IXW2	F4IXW2	748	BIG5	Brefeldin A-inhibited guanine nucleotide-exchange protein 5
272852439880371	273789005279541	274131259918213	27161828994751				12	0	150.32	4603700000	80	38	33.7	34.8	30.5	F4IY75	F4IY75	749	At3g56130	Biotin/lipoyl attachment domain-containing protein
301178073883057	299883422851563	302541732788086	300860061645508	histidyl-tRNA aminoacylation [GO:0006427];mitochondrial translation [GO:0032543]	cytoplasm [GO:0005737];cytosol [GO:0005829];mitochondrion [GO:0005739]	ATP binding [GO:0005524];histidine-tRNA ligase activity [GO:0004821]	73	0	323.31	38775000000	540	44.5	41.4	43.5	43.4	F4IYF8	F4IYF8	750	At3g02760	Histidine--tRNA ligase, cytoplasmic
NaN	248072509765625	NaN	243244361877441		chloroplast [GO:0009507]	ATP binding [GO:0005524];D-alanine-D-alanine ligase activity [GO:0008716];metal ion binding [GO:0046872]	7	0	3.7216	491000000	12	0	3.1	1.1	2.3	F4IYI8	F4IYI8	751	At3g08840	D-alanine-D-alanine ligase family
287664813995361	282159538269043	28601375579834	287644901275635	protein import into nucleus [GO:0006606]	cytoplasm [GO:0005737];cytosol [GO:0005829];nucleus [GO:0005634]	nuclear import signal receptor activity [GO:0061608];nuclear localization sequence binding [GO:0008139];Ran GTPase binding [GO:0008536]	41	0	323.31	48354000000	311	16.3	17.7	17.8	16.4	F4IYK3	F4IYK3	752	At3g08943	ARM repeat superfamily protein
NaN	251304168701172	273986034393311	274182834625244	protein import into nucleus [GO:0006606]	cytosol [GO:0005829];nuclear envelope [GO:0005635]	Ran GTPase binding [GO:0008536]	13	0	70.244	3043800000	50	0	1.1	1.2	2	F4IYK6	F4IYK6	753	At3g08960	ARM repeat superfamily protein
25828010559082	257329349517822	257376613616943	255474853515625	7-methylguanosine mRNA capping [GO:0006370];DNA recombination [GO:0006310];DNA repair [GO:0006281]	host cell nucleus [GO:0042025];plasmodesma [GO:0009506]	ATP binding [GO:0005524];DNA ligase (ATP) activity [GO:0003910];GTP binding [GO:0005525];mRNA guanylyltransferase activity [GO:0004484];polynucleotide 5'-phosphatase activity [GO:0004651];protein tyrosine phosphatase activity [GO:0004725];protein tyrosine/serine/threonine phosphatase activity [GO:0008138]	6	0.0011253	2.4081	1891100000	22	3.3	3.3	3.3	3.3	F4IYM6	F4IYM6	754	At3g09100	mRNA capping enzyme family protein
277208404541016	278317108154297	278753147125244	275492191314697				22	0	48.169	5563300000	144	15.9	12.2	16.4	16.4	F4IYR7;Q9SRD0	F4IYR7	755	At3g15410	Leucine-rich repeat (LRR) family protein
264127216339111	264412174224854	262568645477295	264248790740967				5	0	7.9091	934900000	27	14.6	14.6	10.1	10.1	F4IZI7	F4IZI7	757	AtATG18a	Transducin/WD40 repeat-like superfamily protein
NaN	263778419494629	264613742828369	NaN	embryo sac development [GO:0009553];mRNA transport [GO:0051028];pollen development [GO:0009555];pollen germination [GO:0009846];pollen tube growth [GO:0009860];regulation of protein export from nucleus [GO:0046825];ribosomal large subunit export from nucleus [GO:0000055];ribosomal small subunit export from nucleus [GO:0000056]	cytoplasm [GO:0005737];nuclear membrane [GO:0031965];nuclear pore [GO:0005643];nucleus [GO:0005634];plasmodesma [GO:0009506]	nuclear export signal receptor activity [GO:0005049];Ran GTPase binding [GO:0008536]	23	0	19.224	1307400000	30	2.2	6.4	5.9	4	F4IZR5	F4IZR5	758	XPO1B	Protein EXPORTIN 1B
199496326446533	199983806610107	199993457794189	197143287658691	double fertilization forming a zygote and endosperm [GO:0009567];mRNA splice site selection [GO:0006376]	cytosol [GO:0005829];U1 snRNP [GO:0005685]	mRNA binding [GO:0003729]	16	0	31.466	2115700000	57	2	2	2	2	F4IZU3	F4IZU3	759	UNE6	LUC7 related protein
2590403175354	260517539978027	259532489776611	258359794616699		chloroplast [GO:0009507]		6	0	72.807	1256900000	21	2.4	12.6	10.6	2.4	F4IZV9	F4IZV9	760	At3g09250	Nuclear transport factor 2 (NTF2) family protein
233315601348877	23325532913208	234636363983154	244538745880127	cell cycle [GO:0007049];cell division [GO:0051301];cytoplasmic mRNA processing body assembly [GO:0033962];deadenylation-dependent decapping of nuclear-transcribed mRNA [GO:0000290];mRNA processing [GO:0006397];stem cell population maintenance [GO:0019827]	endoplasmic reticulum [GO:0005783];nucleus [GO:0005634];P-body [GO:0000932]	RNA binding [GO:0003723]	5	0	4.1249	385890000	20	2.6	4.9	1.2	1.2	F4J077	F4J077	761	PAT1H1	Protein PAT1 homolog 1
2280837059021	239531364440918	NaN	230605220794678	autophagosome assembly [GO:0000045];pollen development [GO:0009555]	autophagosome membrane [GO:0000421];cytosol [GO:0005829];integral component of membrane [GO:0016021];plasma membrane [GO:0005886]		52	0	310.16	13305000000	225	0.6	0.9	0	1.5	F4J0P2	F4J0P2	763	At3g50590	Transducin/WD40 repeat-like superfamily protein
294607639312744	297680282592773	296365795135498	296063785552979	starch catabolic process [GO:0005983]	chloroplast [GO:0009507];chloroplast starch grain [GO:0009569];chloroplast stroma [GO:0009570];starch grain [GO:0043036]	carbohydrate phosphatase activity [GO:0019203];protein tyrosine/serine/threonine phosphatase activity [GO:0008138]	25	0	102.74	15298000000	199	28.4	28.8	27.6	27.9	F4J117	F4J117	765	LSF1	Phosphoglucan phosphatase LSF1, chloroplastic
2655348777771	266921882629395	265340957641602	266808338165283	transcription, DNA-templated [GO:0006351]	cytosol [GO:0005829];nucleus [GO:0005634]	transcription corepressor activity [GO:0003714]	11	0	12.1	2742800000	55	7.6	5.8	9.6	9.6	F4J153	F4J153	767	At3g03570	Signal transducer, putative (DUF3550/UPF0682)
312078094482422	318375186920166	30483757019043	315271987915039	cell division [GO:0051301];chloroplast fission [GO:0010020];regulation of division septum assembly [GO:0032955]	chloroplast inner membrane [GO:0009706]		27	0	323.31	39598000000	356	55.1	59.1	48.7	54.8	F4J1U2	F4J1U2	768	At3g29185	Glutamate NMDA receptor subunit epsilon-1, putative (DUF3598)
303590908050537	314184036254883	303070430755615	30206995010376	carbohydrate metabolic process [GO:0005975];response to bacterium [GO:0009617]	anchored component of plasma membrane [GO:0046658];apoplast [GO:0048046];cell wall [GO:0005618];endoplasmic reticulum [GO:0005783];secretory vesicle [GO:0099503]	cellulase activity [GO:0008810];glucan endo-1,3-beta-D-glucosidase activity [GO:0042973]	20	0	323.31	37209000000	259	68.3	68.3	76.8	63.3	F4J270	F4J270	769	BG3	Probable glucan endo-1,3-beta-glucosidase BG3
255563125610352	25747631072998	2611354637146	256704177856445	folic acid-containing compound biosynthetic process [GO:0009396];one-carbon metabolic process [GO:0006730];photorespiration [GO:0009853];seedling development [GO:0090351];tetrahydrofolylpolyglutamate biosynthetic process [GO:0046901]	cytoplasm [GO:0005737];cytosol [GO:0005829];mitochondrial inner membrane [GO:0005743];mitochondrial matrix [GO:0005759];mitochondrion [GO:0005739]	ATP binding [GO:0005524];metal ion binding [GO:0046872];tetrahydrofolylpolyglutamate synthase activity [GO:0004326]	6	0	8.9907	1243600000	36	8.5	7	8.5	8.5	F4J2K2	F4J2K2	770	FPGS2	Folylpolyglutamate synthase
277145004272461	274429264068604	27684986114502	274681663513184	mature ribosome assembly [GO:0042256]	cytosol [GO:0005829];ribonucleoprotein complex [GO:1990904];ribosome [GO:0005840]	GTP binding [GO:0005525];GTPase activity [GO:0003924];ribosome binding [GO:0043022];translation elongation factor activity [GO:0003746]	26	0	87.747	6226700000	167	11.9	10.6	15	12.5	F4J2T9	F4J2T9	771	At3g22980	Ribosomal protein S5/Elongation factor G/III/V family protein
245338001251221	245973014831543	232475547790527	22877269744873	nucleotide metabolic process [GO:0009117]		guanylate kinase activity [GO:0004385]	8	0	21.727	1662400000	36	2.1	2.1	5.4	4.9	F4J3E9	F4J3E9	775	AGK2	Guanylate kinase
281229724884033	28164421081543	282220935821533	282198352813721	carbohydrate metabolic process [GO:0005975]	vacuolar membrane [GO:0005774]	lyase activity [GO:0016829];polygalacturonase activity [GO:0004650]	10	0	60.305	5868800000	133	20.6	20.6	19	20.6	F4J3I0	F4J3I0	776	At3g57790	Pectin lyase-like superfamily protein
287494792938232	286638031005859	286667175292969	28645092010498	peptidyl-diphthamide biosynthetic process from peptidyl-histidine [GO:0017183]		diphthine-ammonia ligase activity [GO:0017178]	21	0	131.6	10585000000	170	14.9	18.9	17.8	22.1	F4J3Q1	F4J3Q1	778	At3g04480	Endoribonuclease
263203258514404	258187274932861	267523860931396	264639797210693			serine-type carboxypeptidase activity [GO:0004185]	8	0	17.296	1090200000	20	12.4	11.7	12.4	14.5	F4J3S3	F4J3S3	779	SCPL7	Serine carboxypeptidase-like 7
295862045288086	298373012542725	294814300537109	295753345489502	tryptophanyl-tRNA aminoacylation [GO:0006436]		ATP binding [GO:0005524];transferase activity [GO:0016740];tryptophan-tRNA ligase activity [GO:0004830]	23	0	65.668	19292000000	128	23.1	20.6	31.8	21.9	F4J4T3	F4J4T3	783	At3g04600	Nucleotidylyl transferase superfamily protein
258771286010742	259159069061279	25905179977417	258955516815186	intracellular protein transport [GO:0006886]		Ran GTPase binding [GO:0008536]	12	0	15.052	1593700000	30	0.8	0.8	0.8	0.8	F4J550	F4J550	784	At3g17340	ARM repeat superfamily protein
249145622253418	246657371520996	243877830505371	247939701080322			kinase activity [GO:0016301];polysaccharide binding [GO:0030247]	1	0	27.733	201660000	6	7.3	7.3	7.3	7.3	F4J551	F4J551	785	At3g17350	Wall-associated receptor kinase carboxy-terminal protein
249384059906006	251385250091553	253346309661865	25032377243042			metal ion binding [GO:0046872];RNA binding [GO:0003723]	5	0	5.5136	744870000	16	1.9	1.9	1.9	0.8	F4J5A7	F4J5A7	786	At3g23900	RNA recognition motif (RRM)-containing protein
200634212493896	222364883422852	195149345397949	218034515380859	regulation of phosphoprotein phosphatase activity [GO:0043666]		protein phosphatase binding [GO:0019903];protein phosphatase regulator activity [GO:0019888]	30	0	248.97	12859000000	150	1.3	4.7	2.8	2.8	F4J5I0	F4J5I0	787	At3g45190	SIT4 phosphatase-associated family protein
252688522338867	NaN	24981330871582	254264316558838	clathrin coat assembly [GO:0048268];clathrin-dependent endocytosis [GO:0072583];intracellular protein transport [GO:0006886]	clathrin coat of coated pit [GO:0030132];clathrin coat of trans-Golgi network vesicle [GO:0030130];clathrin vesicle coat [GO:0030125];cytosol [GO:0005829];plasma membrane [GO:0005886]	clathrin heavy chain binding [GO:0032050];structural molecule activity [GO:0005198]	6	0	36.01	792710000	19	10.1	3.1	10.1	3.1	F4J5M9	F4J5M9	788	At3g51890	Clathrin light chain 3
238306484222412	238838081359863	NaN	NaN	DNA-dependent DNA replication [GO:0006261]		DNA binding [GO:0003677];DNA-directed DNA polymerase activity [GO:0003887];exonuclease activity [GO:0004527]	3	0	4.185	203390000	8	8.7	5.1	0	0	F4J5Q3	F4J5Q3	789	At3g52050	5'-3' exonuclease family protein
287144680023193	286531467437744	29190393447876	291284160614014	intracellular distribution of mitochondria [GO:0048312];positive regulation of mitochondrial fusion [GO:0010636]	cytosol [GO:0005829];plasma membrane [GO:0005886]	RNA binding [GO:0003723]	79	0	323.31	46630000000	717	19.5	15.6	20.6	16.6	F4J5R9	F4J5R9	790	NOXY38	Clustered mitochondria protein homolog
284958324432373	286920547485352	287716846466064	284237022399902		cytosol [GO:0005829];mitochondrion [GO:0005739]	ATP binding [GO:0005524];transferase activity, transferring acyl groups [GO:0016746]	45	0	323.31	35376000000	439	25.7	26.4	26.6	23.3	F4J5T2	F4J5T2	791	LTA3	Dihydrolipoamide acetyltransferase component of pyruvate dehydrogenase complex
290933799743652	291752662658691	289099063873291	28727575302124	formation of cytoplasmic translation initiation complex [GO:0001732]	cytosol [GO:0005829];eukaryotic 43S preinitiation complex [GO:0016282];eukaryotic 48S preinitiation complex [GO:0033290];eukaryotic translation initiation factor 3 complex [GO:0005852];plasma membrane [GO:0005886]	mRNA binding [GO:0003729];translation initiation factor activity [GO:0003743]	23	0	198.61	18417000000	185	36.1	36.1	36.1	33.3	F4J6A1	F4J6A1	792	EIF3G1	Eukaryotic translation initiation factor 3 subunit G
289746780395508	288906726837158	291380939483643	292385196685791	chromatin silencing [GO:0006342];embryo development ending in seed dormancy [GO:0009793];leaf development [GO:0048366];regulation of flower development [GO:0009909];shoot apical meristem development [GO:1902182]	cytosol [GO:0005829]	DNA binding [GO:0003677]	35	0	76.659	12102000000	285	37.1	32.3	31.8	32.6	F4J6A8	F4J6A8	793	At3g11450	DnaJ and Myb-like DNA-binding domain-containing protein
266028614044189	278570346832275	261154327392578	250012283325195	intracellular signal transduction [GO:0035556];peptidyl-serine phosphorylation [GO:0018105];protein autophosphorylation [GO:0046777];regulation of growth [GO:0040008]	cytosol [GO:0005829];plasma membrane [GO:0005886];root hair [GO:0035618]	ATP binding [GO:0005524];kinase activity [GO:0016301];metal ion binding [GO:0046872];protein serine/threonine kinase activity [GO:0004674]	15	0	21.801	4692700000	40	2.7	1.1	0.8	0.8	F4J6F6	F4J6F6	794	IREH1	Probable serine/threonine protein kinase IREH1
NaN	243145809173584	247095146179199	NaN	ubiquinone biosynthetic process [GO:0006744]	extrinsic component of mitochondrial inner membrane [GO:0031314];mitochondrion [GO:0005739]	FAD binding [GO:0071949];oxidoreductase activity [GO:0016491];oxidoreductase activity, acting on paired donors, with incorporation or reduction of molecular oxygen, NAD(P)H as one donor, and incorporation of one atom of oxygen [GO:0016709];oxidoreductase activity, acting on paired donors, with incorporation or reduction of molecular oxygen, reduced flavin or flavoprotein as one donor, and incorpo…	9	0	34.26	1124700000	31	0	5.5	7.7	0	F4J6I6	F4J6I6	795	COQ6	Ubiquinone biosynthesis monooxygenase COQ6, mitochondrial
274447441101074	280264911651611	277823181152344	276535568237305	protein import into nucleus [GO:0006606]	cytosol [GO:0005829];nuclear envelope [GO:0005635]	Ran GTPase binding [GO:0008536]	44	0	323.31	25860000000	315	10.8	18	15	14.9	F4J738;REV__Q9M0M4	F4J738	796	At3g59020	Importin beta-like SAD2 homolog
275526676177979	271975116729736	269804363250732	271775016784668	actin cytoskeleton organization [GO:0030036];actin filament capping [GO:0051693];actin filament organization [GO:0007015];barbed-end actin filament capping [GO:0051016]	F-actin capping protein complex [GO:0008290];nucleus [GO:0005634]	actin filament binding [GO:0051015]	6	0	9.6136	3065900000	44	14.9	10.2	12	9.9	F4J7C4	F4J7C4	797	CPA	Subunits of heterodimeric actin filament capping protein Capz superfamily
282943458557129	282847156524658	282711505889893	283879642486572	protein deubiquitination [GO:0016579];ubiquitin-dependent protein catabolic process [GO:0006511]		thiol-dependent ubiquitinyl hydrolase activity [GO:0036459]	99	0	253.81	22534000000	310	39.9	36.4	41.7	40.5	F4J7I2	F4J7I2	798	UBP13	Ubiquitin-specific protease 13
218305892944336	NaN	208586311340332	NaN	endocytosis [GO:0006897];pollen development [GO:0009555]	cell plate [GO:0009504];cytoplasm [GO:0005737];cytoskeleton [GO:0005856];cytosol [GO:0005829];nucleus [GO:0005634];phragmoplast [GO:0009524];plasma membrane [GO:0005886];plasmodesma [GO:0009506]	identical protein binding [GO:0042802]	52	0	323.31	15612000000	245	1.9	0	1.6	0	F4J8D3	F4J8D3	800	TPLATE	Protein TPLATE
261024150848389	272589874267578	267121410369873	268377380371094	embryo development ending in seed dormancy [GO:0009793];mRNA methylation [GO:0080009];mRNA processing [GO:0006397];RNA splicing [GO:0008380]	nuclear speck [GO:0016607];nucleoplasm [GO:0005654]		10	0	51.353	2974800000	24	0.4	0.4	0.4	0.4	F4J8G7	F4J8G7	801	VIR	Protein virilizer homolog
274745235443115	282824630737305	278042736053467	276884574890137			hydrolase activity [GO:0016787]	8	0	71.901	3521300000	64	26.1	42.2	37.7	32.2	F4J8J7	F4J8J7	802	At3g11930	Adenine nucleotide alpha hydrolases-like superfamily protein
25285737991333	26935396194458	NaN	262744426727295	embryo sac development [GO:0009553];mRNA processing [GO:0006397];rRNA processing [GO:0006364]	nucleolus [GO:0005730];plasma membrane [GO:0005886];small-subunit processome [GO:0032040]	RNA binding [GO:0003723]	21	0	52.757	3762700000	63	2.3	1.4	0.4	2.3	F4J8K6	F4J8K6	803	RRP5	rRNA biogenesis protein RRP5
279602489471436	NaN	27525520324707	273784866333008	intracellular signal transduction [GO:0035556];protein phosphorylation [GO:0006468];regulation of gene expression [GO:0010468];regulation of mRNA processing [GO:0050684];response to oxidative stress [GO:0006979];spliceosomal complex assembly [GO:0000245]	cytoplasm [GO:0005737];nucleus [GO:0005634]	ATP binding [GO:0005524];MAP kinase activity [GO:0004707];protein kinase activity [GO:0004672]	4	0	4.6183	2476600000	21	1.7	0	1.7	3.8	F4J982	F4J982	806	SRPK4	Ser/arg-rich protein kinase 4
295021266937256	294778842926025	295512924194336	296177539825439	glutamine biosynthetic process [GO:0006542];lateral root formation [GO:0010311];polyamine catabolic process [GO:0006598];response to abscisic acid [GO:0009737];response to bacterium [GO:0009617];root cap development [GO:0048829]	cytosol [GO:0005829]	gamma-tubulin binding [GO:0043015];hydrolase activity [GO:0016787];protein self-association [GO:0043621];transcription factor binding [GO:0008134]	53	0	323.31	32449000000	434	34.7	29.6	32.2	27.3	F4J9A0	F4J9A0	807	NodGS	Nodulin/glutamine synthase-like protein
290535678863525	294117126464844	291483135223389	285557060241699		cytosol [GO:0005829]		51	0	257.23	12909000000	195	34.8	41	42.9	32.8	F4J9K9	F4J9K9	809	At3g05900	Neurofilament protein-like protein
NaN	266059722900391	NaN	267706470489502	ATP-dependent chromatin remodeling [GO:0043044];maintenance of root meristem identity [GO:0010078];maintenance of seed dormancy [GO:0010231];maintenance of shoot apical meristem identity [GO:0010492];positive regulation of transcription by RNA polymerase II [GO:0045944];regulation of growth [GO:0040008];response to heat [GO:0009408];response to salt stress [GO:0009651];response to water deprivati…	nucleus [GO:0005634]	ATP binding [GO:0005524];DNA binding [GO:0003677];DNA helicase activity [GO:0003678];DNA-dependent ATPase activity [GO:0008094];histone binding [GO:0042393]	4	0.0048922	1.8615	1162800000	14	0	0.8	0	0.8	F4J9M5	F4J9M5	810	CHR12	Probable ATP-dependent DNA helicase CHR12
26612735748291	264639472961426	264432582855225	260664253234863			metal ion binding [GO:0046872];oxidoreductase activity [GO:0016491]	12	0	24.859	2348300000	52	23	27.7	29.9	16.5	F4J9Y8	F4J9Y8	811	At3g19000	2-oxoglutarate (2OG) and Fe(II)-dependent oxygenase superfamily protein
243525218963623	NaN	243915252685547	NaN			aspartic-type endopeptidase activity [GO:0004190]	2	0	5.9005	590380000	4	2	0	4.6	0	F4JA44	F4JA44	812	At3g25700	Eukaryotic aspartyl protease family protein
248423500061035	255335025787354	253732852935791	259423923492432	carbohydrate metabolic process [GO:0005975]		hydrolase activity, hydrolyzing O-glycosyl compounds [GO:0004553]	16	0	13.528	1012000000	32	20.6	19.2	22.9	19.4	F4JAB3	F4JAB3	814	At3g47010	Glycosyl hydrolase family protein
265573062896729	265069408416748	26583194732666	270286521911621				8	0	16.5	4923600000	24	7	8.2	3	4.7	F4JAE0	F4JAE0	815	At3g53390	Transducin/WD40 repeat-like superfamily protein
NaN	28112621307373	292940826416016	285438480377197	translational elongation [GO:0006414]	cytosol [GO:0005829];ribonucleoprotein complex [GO:1990904];ribosome [GO:0005840]	GTP binding [GO:0005525];GTPase activity [GO:0003924];ribosome binding [GO:0043022];translation elongation factor activity [GO:0003746]	45	0	28.492	9201900000	18	38	37	39	37.7	F4JB05	F4JB05	817	MGH6.2	Ribosomal protein S5/Elongation factor G/III/V family protein
258139667510986	254448699951172	NaN	247046146392822	signal transduction [GO:0007165]	cytosol [GO:0005829];nucleus [GO:0005634];protein phosphatase type 2A complex [GO:0000159]	protein phosphatase regulator activity [GO:0019888]	9	0	6.4985	1019000000	19	5.7	6.2	3.8	7.2	F4JBC4	F4JBC4	818	At3g26020	Serine/threonine protein phosphatase 2A regulatory subunit
295775146484375	296442852020264	295335063934326	296237125396729		chloroplast [GO:0009507]		12	0	134.06	14313000000	179	47.4	41.6	38.8	41.6	F4JBU0	F4JBU0	820	At3g60440	Phosphoglycerate mutase family protein
259186401367188	257866611480713	264142723083496	260282096862793			3-hydroxyisobutyryl-CoA hydrolase activity [GO:0003860];peptidase activity [GO:0008233]	6	0	13.29	598460000	18	8.2	17.4	17.4	19.7	F4JBV0	F4JBV0	821	At3g60510	ATP-dependent caseinolytic (Clp) protease/crotonase family protein
210038795471191	249452095031738	237826671600342	24260763168335	DNA repair [GO:0006281];proteasomal ubiquitin-independent protein catabolic process [GO:0010499]	cytosol [GO:0005829];nucleus [GO:0005634];proteasome complex [GO:0000502]	lysine-acetylated histone binding [GO:0070577];peptidase activator activity [GO:0016504];proteasome binding [GO:0070628]	59	0	199.89	17169000000	263	0.4	0.6	0.6	1.2	F4JC97	F4JC97	822	PA200	Proteasome activator subunit 4
266598968505859	265526390075684	273186378479004	261333980560303			ATP binding [GO:0005524];hydrolase activity [GO:0016787]	29	0	67.805	5287000000	86	1.5	3.7	1.5	2.6	F4JCC9	F4JCC9	823	At3g19740	P-loop containing nucleoside triphosphate hydrolases superfamily protein
27927562713623	276077365875244	283249588012695	275680484771729	arabinogalactan protein metabolic process [GO:0010405];carbohydrate metabolic process [GO:0005975]	cell wall [GO:0005618]	hydrolase activity, hydrolyzing O-glycosyl compounds [GO:0004553];polysaccharide binding [GO:0030247];raffinose alpha-galactosidase activity [GO:0052692]	12	0	20.702	3382400000	98	9.3	11.3	9.6	10.7	F4JCI4	F4JCI4	825	At3g26380	Alpha-galactosidase
246156578063965	23483699798584	228281497955322	249380912780762				18	0	43.523	2507900000	64	0.9	1.6	1.6	0.9	F4JCM5	F4JCM5	826	At3g33530	Transducin family protein / WD-40 repeat family protein
292667140960693	291146583557129	292318744659424	293013191223145	protein deubiquitination [GO:0016579]		thiol-dependent ubiquitinyl hydrolase activity [GO:0036459]	3	0.0033009	2.0412	6928000000	3	0.6	1.4	0.6	0.6	F4JCR1	F4JCR1	827	At3g47890	Ubiquitin carboxyl-terminal hydrolase-related protein
242448863983154	245976428985596	240844821929932	231678771972656	miRNA mediated inhibition of translation [GO:0035278]	nucleus [GO:0005634];P-body [GO:0000932]	chromatin binding [GO:0003682]	7	0	11.504	910140000	17	2	2.9	2	1.1	F4JCS8	F4JCS8	829	SUO	Protein SUO
255765209197998	260340175628662	252231712341309	253055648803711	isopentenyl diphosphate biosynthetic process, mevalonate pathway [GO:0019287];sterol biosynthetic process [GO:0016126]	cytosol [GO:0005829];peroxisome [GO:0005777]	ATP binding [GO:0005524];diphosphomevalonate decarboxylase activity [GO:0004163]	23	0	38.264	2623100000	52	28.4	30.3	25.8	27.9	F4JCU3	F4JCU3	830	MVD2	Diphosphomevalonate decarboxylase MVD2, peroxisomal
305872783660889	NaN	308241882324219	300370845794678			phosphatidylinositol binding [GO:0035091]	1	0.0023981	2.1376	11854000000	7	1.3	0	1.3	1.3	F4JDV4	F4JDV4	832	At3g48195	Phox (PX) domain-containing protein
260096015930176	263819885253906	259216156005859	260637760162354		secretory vesicle [GO:0099503];vacuole [GO:0005773]		5	0	6.5578	1037200000	26	16.6	15.5	16.6	14.4	F4JEG0	F4JEG0	835	At3g07460	Uncharacterized protein
290486392974854	291709041595459	288587532043457	292110404968262			hydrolase activity [GO:0016787]	16	0	196.04	7928100000	158	48.4	65.2	51.6	55.9	F4JEJ3	F4JEJ3	836	At3g13800	Metallo-hydrolase/oxidoreductase superfamily protein
322957038879395	324490394592285	324380264282227	323598251342773			ATP binding [GO:0005524];helicase activity [GO:0004386];translation initiation factor activity [GO:0003743]	52	0	323.31	265300000000	1226	76.7	70.8	74.2	77.9	F4JEL5	F4JEL5	837	EIF4A1	Eukaryotic translation initiation factor 4A1
2509006690979	255548496246338	250465183258057	255040340423584				10	0	39.892	1873900000	51	10.8	7.3	7.3	7.3	F4JET6	F4JET6	838	JMJD5	2-oxoglutarate (2OG) and Fe(II)-dependent oxygenase superfamily protein
233070259094238	225866680145264	23228422164917	238271617889404	activation of GTPase activity [GO:0090630];intracellular protein transport [GO:0006886]	cytosol [GO:0005829]	GTPase activator activity [GO:0005096];Rab GTPase binding [GO:0017137]	18	0	48.433	4197500000	52	4.9	1.5	4.9	4.9	F4JF82	F4JF82	840	At3g55020	Ypt/Rab-GAP domain of gyp1p superfamily protein
NaN	NaN	246176776885986	241740951538086			oxidoreductase activity [GO:0016491]	3	0.00094697	2.5849	259270000	2	0	3.9	9	9	F4JFB9	F4JFB9	842	SDRd	NAD(P)-binding Rossmann-fold superfamily protein
288349380493164	284539546966553	277169227600098	282055969238281	protein folding [GO:0006457]	cell wall [GO:0005618];chloroplast stroma [GO:0009570];cytosol [GO:0005829];mitochondrion [GO:0005739]	ATP binding [GO:0005524];unfolded protein binding [GO:0051082]	76	0	323.31	52548000000	437	21.4	20.3	22.4	21.2	F4JFN3	F4JFN3	845	HSP90-6	Heat shock protein 90-6, mitochondrial
NaN	NaN	233705272674561	253368797302246	regulation of RNA metabolic process [GO:0051252]	nucleus [GO:0005634];ribonucleoprotein complex [GO:1990904]	mRNA binding [GO:0003729];RNA binding [GO:0003723]	7	0	20.697	1924000000	17	0	1.6	3	4.6	F4JFN7	F4JFN7	846	At3g07810	RNA-binding (RRM/RBD/RNP motifs) family protein
234475841522217	NaN	243629245758057	228993091583252	positive regulation of chaperone-mediated protein folding [GO:1903646];posttranslational protein targeting to endoplasmic reticulum membrane [GO:0006620];ubiquitin-dependent ERAD pathway [GO:0030433]	cytosol [GO:0005829];membrane [GO:0016020];TRC complex [GO:0072380]	molecular adaptor activity [GO:0060090]	11	0	28.833	1599300000	34	5.6	0	2.8	2.8	F4JG03	F4JG03	848	TPR8	Tetratricopeptide repeat (TPR)-like superfamily protein
282952651977539	NaN	282810039520264	283706932067871	xylan catabolic process [GO:0045493]		endo-1,4-beta-xylanase activity [GO:0031176]	5	0	3.2637	1933800000	27	1.2	0	1.2	1.2	F4JG10	F4JG10	849	XYN3	Endo-1,4-beta-xylanase 3
278240203857422	278329181671143	278981609344482	27223705291748	embryo development ending in seed dormancy [GO:0009793];fructose 6-phosphate metabolic process [GO:0006002];photosynthesis [GO:0015979];response to glucose [GO:0009749]	cytosol [GO:0005829]	6-phosphofructokinase activity [GO:0003872];ATP binding [GO:0005524];diphosphate-fructose-6-phosphate 1-phosphotransferase activity [GO:0047334];metal ion binding [GO:0046872];phosphofructokinase activity [GO:0008443]	30	0	46.116	4432200000	92	30.4	25.5	20.6	23.9	F4JGR5	F4JGR5	853	PFP-BETA2	Pyrophosphate--fructose 6-phosphate 1-phosphotransferase subunit beta 2
264864330291748	260966167449951	265031547546387	265310344696045	acyl-CoA metabolic process [GO:0006637];fatty acid catabolic process [GO:0009062]		acyl-CoA hydrolase activity [GO:0047617]	6	0	11.131	1230100000	53	13.2	10.2	10.9	15.5	F4JHC9	F4JHC9	855	At4g00520	Acyl-CoA thioesterase family protein
24721715927124	249959774017334	247553691864014	248488578796387				4	0	4.121	959830000	18	4.8	4.8	4.8	4.8	F4JHD7	F4JHD7	856	At4g00560	NAD(P)-binding Rossmann-fold superfamily protein
302862586975098	259397735595703	NaN	NaN	acceptance of pollen [GO:0060321];exocytosis [GO:0006887];Golgi to plasma membrane transport [GO:0006893];pollen germination [GO:0009846];pollen tube growth [GO:0009860];vesicle docking involved in exocytosis [GO:0006904]	cell wall [GO:0005618];cytoskeleton [GO:0005856];cytosol [GO:0005829];exocyst [GO:0000145];extracellular exosome [GO:0070062];membrane [GO:0016020];phragmoplast [GO:0009524];plasma membrane [GO:0005886];plasmodesma [GO:0009506]		27	0	79.407	7110600000	94	4.8	3.9	0	0	F4JHH5	F4JHH5	857	SEC15B	Exocyst complex component SEC15B
314463310241699	316603813171387	315776767730713	315416698455811				28	0	323.31	75210000000	509	55.4	55.4	55.4	55.4	F4JHJ0	F4JHJ0	859	At4g02450	HSP20-like chaperones superfamily protein
2388623046875	NaN	NaN	226332950592041	intracellular protein transport [GO:0006886];pollen development [GO:0009555];vesicle-mediated transport [GO:0016192]			9	0	12.428	774490000	27	2.2	0	0	2.2	F4JHM9	F4JHM9	860	SETH5	Transducin family protein / WD-40 repeat family protein
276371326446533	27671215057373	276391353607178	278913383483887	biosynthetic process [GO:0009058]	cytosol [GO:0005829]	catalytic activity [GO:0003824]	12	0	48.673	6100600000	103	13.1	13.1	13.1	20.1	F4JHW1	F4JHW1	861	At4g02860	Phenazine biosynthesis PhzC/PhzF protein
30257884979248	303580436706543	305677394866943	30503604888916		chloroplast [GO:0009507]	catalytic activity [GO:0003824]	40	0	287.22	22738000000	360	37.9	37.9	39.7	37.2	F4JI63	F4JI63	864	At4g03200	Catalytics
258897380828857	258786277770996	255999717712402	2544748878479	DNA catabolic process [GO:0006308];RNA phosphodiester bond hydrolysis, endonucleolytic [GO:0090502]		endonuclease activity [GO:0004519];endoribonuclease activity [GO:0004521];metal ion binding [GO:0046872];nucleic acid binding [GO:0003676];single-stranded DNA endodeoxyribonuclease activity [GO:0000014]	5	0	4.6509	1022400000	19	9.4	12.7	12.7	9.7	F4JJL0	F4JJL0	869	ENDO4	Endonuclease 4
261683292388916	265435810089111	258021068572998	244983234405518	DNA catabolic process [GO:0006308];RNA phosphodiester bond hydrolysis, endonucleolytic [GO:0090502]		endonuclease activity [GO:0004519];endoribonuclease activity [GO:0004521];metal ion binding [GO:0046872];nucleic acid binding [GO:0003676];single-stranded DNA endodeoxyribonuclease activity [GO:0000014];T/G mismatch-specific endonuclease activity [GO:0043765]	12	0	52.349	5831700000	49	9.8	8.8	8.8	6.4	F4JJL3	F4JJL3	870	ENDO5	Endonuclease 5
235750789642334	232674236297607	239028816223145	233800735473633				4	0	7.1951	216530000	15	19.4	19.4	30.6	30.6	F4JJL6	F4JJL6	871	At4g21620	Glycine-rich protein
27762622833252	279028816223145	279121646881104	280212574005127	intracellular protein transport [GO:0006886]			17	0	133.83	7381300000	94	21.5	26.9	33.1	28.7	F4JJR0	F4JJR0	873	VPS26B	Vacuolar protein sorting 26B
294339027404785	296738948822021	295895843505859	296738605499268	tRNA aminoacylation for protein translation [GO:0006418]	chloroplast [GO:0009507];cytosol [GO:0005829];mitochondrion [GO:0005739]	aspartate-tRNA ligase activity [GO:0004815];ATP binding [GO:0005524];DNA binding [GO:0003677];metal ion binding [GO:0046872]	28	0	84.518	13209000000	248	30.1	34	35.8	38.7	F4JJT9	F4JJT9	874	At4g33760	Aspartate--tRNA ligase, chloroplastic/mitochondrial
27939884185791	2789723777771	279093055725098	27675931930542		chloroplast [GO:0009507];chloroplast stroma [GO:0009570]		11	0	24.381	3521800000	51	33.3	27.2	24.9	23.6	F4JJY7	F4JJY7	875	At4g34090	Cyclin delta-3
256457595825195	264546127319336	26196704864502	263889656066895		cytosol [GO:0005829]	2,3-bisphosphoglycerate-independent phosphoglycerate mutase activity [GO:0046537];metal ion binding [GO:0046872]	18	0	102.27	4278800000	144	10.4	8.9	15.7	16.5	F4JK17	F4JK17	876	At4g09520	Cofactor-independent phosphoglycerate mutase
227555618286133	227805671691895	NaN	228437385559082	mRNA processing [GO:0006397];snoRNA processing [GO:0043144];tRNA 5'-leader removal [GO:0001682]	nucleus [GO:0005634]	metal ion binding [GO:0046872];ribonuclease P activity [GO:0004526]	6	0	48.032	589920000	23	2.1	2.1	0	2.1	F4JKB6	F4JKB6	877	PRORP3	Proteinaceous RNase P 3
288672637939453	289946136474609	278876247406006	287790641784668	cell cycle [GO:0007049];multicellular organism development [GO:0007275];response to abscisic acid [GO:0009737]	cytoplasm [GO:0005737];plasma membrane [GO:0005886]		85	0	323.31	35992000000	559	16.2	17	16	14.3	F4JKH6	F4JKH6	879	TSS	Protein TSS
302946090698242	302886810302734	304871158599854	305169067382813		chloroplast [GO:0009507];chloroplast stroma [GO:0009570];cytosol [GO:0005829]		21	0	209.43	20562000000	234	52.2	54.7	54.7	46.7	F4JKZ9	F4JKZ9	880	At4g16060	Uncharacterized protein
302611408233643	303704643249512	303173236846924	302594585418701	NLS-bearing protein import into nucleus [GO:0006607]	cytosol [GO:0005829];host cell nucleus [GO:0042025];nuclear envelope [GO:0005635];nucleolus [GO:0005730];nucleus [GO:0005634];plasmodesma [GO:0009506]	nuclear import signal receptor activity [GO:0061608];nuclear localization sequence binding [GO:0008139]	41	0	323.31	32345000000	428	61.1	68.4	65.2	69.9	F4JL11	F4JL11	881	IMPA2	Importin subunit alpha-2
2428369140625	250173759460449	251329669952393	255785655975342	chromatin organization [GO:0006325];flower development [GO:0009908];negative regulation of histone acetylation [GO:0035067];negative regulation of long-day photoperiodism, flowering [GO:0048579];post-embryonic development [GO:0009791];regulation of photoperiodism, flowering [GO:2000028];regulation of transcription, DNA-templated [GO:0006355];seed germination [GO:0009845]	nucleus [GO:0005634]	chromatin binding [GO:0003682];metal ion binding [GO:0046872];methylated histone binding [GO:0035064];transcription regulatory region sequence-specific DNA binding [GO:0000976]	3	0	5.59	590450000	17	9	14.1	9	5.1	F4JL28	F4JL28	882	EBS	Chromatin remodeling protein EBS
257169094085693	258458461761475	258307437896729	257808666229248				6	0	5.7697	1135000000	42	7.8	7.8	7.8	7.8	F4JL78	F4JL78	883	At4g28300	Formin-like protein (DUF1421)
313708801269531	314760494232178	314901809692383	315833377838135	isoleucyl-tRNA aminoacylation [GO:0006428];response to cadmium ion [GO:0046686]	cytosol [GO:0005829]	aminoacyl-tRNA editing activity [GO:0002161];ATP binding [GO:0005524];isoleucine-tRNA ligase activity [GO:0004822];tRNA binding [GO:0000049]	109	0	323.31	90694000000	1054	50.6	48.7	47.8	45.2	F4JLM5	F4JLM5	885	At4g10320	Isoleucine--tRNA ligase, cytoplasmic
321827239990234	320855941772461	322110328674316	320988922119141	cell redox homeostasis [GO:0045454];oxidation-reduction process [GO:0055114];response to arsenic-containing substance [GO:0046685]	chloroplast [GO:0009507];chloroplast envelope [GO:0009941];chloroplast stroma [GO:0009570];cytosol [GO:0005829]	dihydrolipoyl dehydrogenase activity [GO:0004148];flavin adenine dinucleotide binding [GO:0050660]	50	0	323.31	88718000000	1028	67.2	69.7	70.9	65.8	F4JLP5	F4JLP5	886	LPD2	Dihydrolipoyl dehydrogenase 2, chloroplastic
262110023498535	25926872253418	254222679138184	252828426361084		cytosol [GO:0005829];endoplasmic reticulum [GO:0005783];integral component of membrane [GO:0016021];plasma membrane [GO:0005886]		3	0	7.2705	3027200000	13	2.6	2.6	2.6	2.6	F4JLQ2	F4JLQ2	887	At4g16180	Transmembrane protein
262911071777344	264372215270996	265680770874023	263961887359619		peroxisome [GO:0005777]	dioxygenase activity [GO:0051213];metal ion binding [GO:0046872]	7	0	46.529	2830100000	58	16.8	13.5	13.7	12.6	F4JLS2	F4JLS2	888	At4g16330	2-oxoglutarate (2OG) and Fe(II)-dependent oxygenase superfamily protein
25561128616333	253457717895508	253155155181885	253117084503174		chloroplast [GO:0009507];cytosol [GO:0005829]	kinase activity [GO:0016301];phosphotransferase activity, alcohol group as acceptor [GO:0016773]	27	0	6.8381	422320000	15	50.9	51.4	51.4	53.4	F4JM15	F4JM15	889	At4g28706	PfkB-like carbohydrate kinase family protein
273474788665771	273476486206055	27279411315918	271662425994873			dioxygenase activity [GO:0051213]	7	0	26.402	3273100000	79	17.8	13.2	21.3	15.9	F4JML2	F4JML2	892	At4g16770	2-oxoglutarate (2OG) and Fe(II)-dependent oxygenase superfamily protein
249552230834961	247945652008057	254558525085449	241306915283203	branched-chain amino acid catabolic process [GO:0009083];fatty acid beta-oxidation [GO:0006635]	cytosol [GO:0005829];mitochondrion [GO:0005739]	enoyl-CoA hydratase activity [GO:0004300];methylglutaconyl-CoA hydratase activity [GO:0004490];peptidase activity [GO:0008233]	4	0.00019231	2.8441	452640000	5	8.6	9	9	8.6	F4JML5	F4JML5	893	At4g16800	Probable enoyl-CoA hydratase 2, mitochondrial
313518447875977	314281234741211	31411449432373	314003963470459	defense response to bacterium, incompatible interaction [GO:0009816];post-embryonic development [GO:0009791];protein folding [GO:0006457];protein targeting to chloroplast [GO:0045036];response to cadmium ion [GO:0046686];vegetative to reproductive phase transition of meristem [GO:0010228]	chloroplast [GO:0009507];cytoplasm [GO:0005737];integral component of chloroplast outer membrane [GO:0031359];nucleus [GO:0005634];plasma membrane [GO:0005886]		27	0	323.31	31905000000	394	76.9	76.9	76.9	76.9	F4JN13	F4JN13	895	AKR2	Ankyrin repeat-containing protein 2
286055488586426	287629699707031	285854167938232	286048774719238		cytosol [GO:0005829]	endoribonuclease activity [GO:0004521]	20	0	323.31	18600000000	257	44.9	44.9	49.4	41.4	F4JNE1	F4JNE1	898	At4g17100	Poly(U)-specific endoribonuclease-B protein
25948844909668	256320362091064	256003398895264	258768711090088		integral component of membrane [GO:0016021]		8	0	61.781	1580200000	39	8.4	11.2	8.9	7.1	F4JPQ4	F4JPQ4	906	AP22.38	G-protein coupled receptor
255965347290039	263201370239258	263271961212158	258761234283447	vesicle-mediated transport [GO:0016192]	cytosol [GO:0005829];nucleus [GO:0005634]		8	0	25.238	1205000000	15	4.6	4.6	4.6	4.6	F4JPR7	F4JPR7	907	PUX8	Plant UBX domain-containing protein 8
NaN	215027599334717	21615894317627	221035766601563	RNA processing [GO:0006396]		RNA binding [GO:0003723]	24	0	74.176	4135200000	99	0	3.1	2.7	2.7	F4JQ75	F4JQ75	908	EMB140	EMBRYO DEFECTIVE 140
308710746765137	309880714416504	308544502258301	30825174331665	carbohydrate metabolic process [GO:0005975]	chloroplast [GO:0009507];cytosol [GO:0005829];plasma membrane [GO:0005886]	kinase activity [GO:0016301];phosphotransferase activity, alcohol group as acceptor [GO:0016773]	37	0	323.31	33735000000	487	62.2	56	57.5	56.6	F4JQ90	F4JQ90	909	At4g30310	FGGY family of carbohydrate kinase
280315475463867	28044059753418	284683589935303	28106143951416	photosynthesis [GO:0015979]	chloroplast [GO:0009507];plasma membrane [GO:0005886]		24	0	105.39	4507200000	151	32.4	31	29.1	32.2	F4JQE2	F4JQE2	910	PDE327	FAD/NAD(P)-binding oxidoreductase family protein
290897998809814	291112041473389	290435123443604	291044216156006	lipid metabolic process [GO:0006629]	plasma membrane [GO:0005886]	phosphoric diester hydrolase activity [GO:0008081]	13	0	113.28	9523900000	158	23.8	23.8	22.8	21.8	F4JQJ7	F4JQJ7	911	At4g36945	PLC-like phosphodiesterases superfamily protein
26065523147583	257788639068604	255307674407959	255749912261963	activation of GTPase activity [GO:0090630];negative regulation of Rho protein signal transduction [GO:0035024];pollen germination [GO:0009846];pollen tube adhesion [GO:0009865];pollen tube development [GO:0048868];pollen tube growth [GO:0009860];positive regulation of GTPase activity [GO:0043547];regulation of growth [GO:0040008];signal transduction [GO:0007165]	apical part of cell [GO:0045177];apical plasma membrane [GO:0016324];cell cortex [GO:0005938];exocytic vesicle [GO:0070382];pollen tube [GO:0090406]	GTPase activator activity [GO:0005096];Rho GTPase binding [GO:0017048]	2	0.0095154	1.4989	1195200000	8	1.7	1.7	1.7	1.7	F4JQZ3	F4JQZ3	913	REN1	Rho GTPase-activating protein REN1
335638809204102	335299682617188	335630874633789	329758415222168	mitochondrial respiratory chain complex I assembly [GO:0032981];NADH dehydrogenase complex assembly [GO:0010257]	chloroplast [GO:0009507];chloroplast stroma [GO:0009570];cytosol [GO:0005829];vacuole [GO:0005773]	unfolded protein binding [GO:0051082]	51	0	323.31	111410000000	662	56.5	57.4	60.4	60.4	F4JRN8	F4JRN8	915	At4g18810	NAD(P)-binding Rossmann-fold superfamily protein
251967811584473	251735610961914	240936164855957	252248649597168		integral component of membrane [GO:0016021]		4	0	6.2619	466780000	19	1.4	1.4	3.3	1.4	F4JRY9	F4JRY9	917	At4g31340	Myosin heavy chain-like protein
253757057189941	252229518890381	251898612976074	251797618865967		integral component of membrane [GO:0016021]	ATP binding [GO:0005524];ATPase activity [GO:0016887];ATPase-coupled transmembrane transporter activity [GO:0042626]	6	0	7.5798	1033800000	25	4.6	2.9	9	2.9	F4JSM3	F4JSM3	920	ABCB28	Non-intrinsic ABC protein 8
256788215637207	NaN	271331043243408	264191036224365	protein transport [GO:0015031];regulation of ARF protein signal transduction [GO:0032012]	chloroplast [GO:0009507];cytosol [GO:0005829];membrane [GO:0016020];trans-Golgi network [GO:0005802]	ARF guanyl-nucleotide exchange factor activity [GO:0005086]	25	0	37.132	2957400000	57	0.7	0	1	0.9	F4JSZ5	F4JSZ5	921	BIG1	Brefeldin A-inhibited guanine nucleotide-exchange protein 1
239875450134277	239619045257568	NaN	244547538757324			dioxygenase activity [GO:0051213]	1	0.0047127	1.8636	232410000	10	2.5	2.5	0	2.5	F4JT13	F4JT13	922	At4g13400	2-oxoglutarate (2OG) and Fe(II)-dependent oxygenase superfamily protein
28910192489624	289525756835938	288771591186523	288733501434326	mRNA cis splicing, via spliceosome [GO:0045292];regulation of alternative mRNA splicing, via spliceosome [GO:0000381]	nuclear speck [GO:0016607];nucleolus [GO:0005730];nucleus [GO:0005634]	RNA binding [GO:0003723]	4	0	29.369	10437000000	22	1.6	1.6	1.6	1.6	F4JT92	F4JT92	924	At4g19610	Nucleotide/nucleic acid binding protein
282059230804443	281339378356934	280881576538086	275473823547363	dephosphorylation [GO:0016311];glycerol biosynthetic process [GO:0006114];riboflavin biosynthetic process [GO:0009231]	mitochondrion [GO:0005739]	glycerol-1-phosphatase activity [GO:0000121];glycerol-3-phosphatase activity [GO:0043136];magnesium ion binding [GO:0000287];phosphatase activity [GO:0016791]	23	0	172.78	9421300000	128	25.2	25.2	30.2	26.8	F4JTE7	F4JTE7	926	GPP1	(DL)-glycerol-3-phosphatase 1, mitochondrial
236295642852783	272059230804443	255923767089844	25145227432251	mitotic sister chromatid cohesion [GO:0007064]			15	0	39.815	3396900000	56	2.8	1.8	4.4	3	F4JTF2	F4JTF2	927	At4g31880	Transcriptional regulator
240268173217773	222504920959473	239173431396484	241513557434082		vacuole [GO:0005773]		26	0	134.19	6197600000	121	7.8	1.5	1.2	1.2	F4JTI1	F4JTI1	928	PHOX4	Protein PHOX4
2143359375	219241199493408	22222110748291	219716892242432	protein transport [GO:0015031]	cytoplasm [GO:0005737];cytosol [GO:0005829];endosome membrane [GO:0010008]	phosphatidylinositol binding [GO:0035091]	10	0	21.103	701350000	24	2.4	2.4	2.4	2.4	F4JTJ2	F4JTJ2	929	EREL1	PX domain-containing protein EREL1
241559944152832	242065753936768	244383487701416	244709758758545	synaptonemal complex assembly [GO:0007130]	chromosome [GO:0005694];nucleus [GO:0005634]		5	0	3.8705	596540000	10	0.9	2.6	0.9	0.9	F4JTJ9	F4JTJ9	930	ASY2	Meiosis-specific protein ASY2
317222023010254	317772159576416	318353748321533	317817153930664	cellular amino acid metabolic process [GO:0006520];response to zinc ion [GO:0010043]	endoplasmic reticulum [GO:0005783];Golgi apparatus [GO:0005794];plasma membrane [GO:0005886];secretory vesicle [GO:0099503];vacuole [GO:0005773]	aminoacylase activity [GO:0004046];metallopeptidase activity [GO:0008237]	43	0	323.31	102190000000	864	66.7	71.8	72.3	66.5	F4JTK8	F4JTK8	931	AQI	Peptidase M20/M25/M40 family protein
NaN	240788745880127	244253444671631	243755073547363				5	0	3.6033	466840000	25	0	7.3	3.3	2.9	F4JTM0	F4JTM0	932	At4g38260	Transport/golgi organization-like protein (DUF833)
234157066345215	239414539337158	23612455368042	237202548980713	cellular response to hypoxia [GO:0071456];chloroplast organization [GO:0009658]	cytosol [GO:0005829]	ATP binding [GO:0005524];protein kinase activity [GO:0004672];protein serine/threonine kinase activity [GO:0004674];protein serine/threonine/tyrosine kinase activity [GO:0004712]	22	0	58.915	4821200000	73	5.9	4	2.8	2.3	F4JTP5	F4JTP5	934	STY46	Serine/threonine-protein kinase STY46
23806266784668	232385749816895	NaN	NaN				6	0	7.9797	315150000	9	2	2	0	0	F4JTS7	F4JTS7	935	At4g13730	Ypt/Rab-GAP domain of gyp1p superfamily protein
290161380767822	290548877716064	291370677947998	292804298400879	COPII-coated vesicle cargo loading [GO:0090110];intracellular protein transport [GO:0006886]	COPII vesicle coat [GO:0030127];cytosol [GO:0005829];endoplasmic reticulum exit site [GO:0070971];endoplasmic reticulum membrane [GO:0005789];Golgi membrane [GO:0000139]	GTPase activator activity [GO:0005096];zinc ion binding [GO:0008270]	43	0	323.31	29854000000	358	26.6	25.5	31.8	20.7	F4JUM1	F4JUM1	938	At4g14160	Protein transport protein SEC23
324578971862793	323753395080566	324441604614258	324519653320313	proteolysis [GO:0006508]	chloroplast [GO:0009507];cytoplasm [GO:0005737];cytosol [GO:0005829];cytosolic ribosome [GO:0022626];vacuolar membrane [GO:0005774];vacuole [GO:0005773]	aminopeptidase activity [GO:0004177];serine-type endopeptidase activity [GO:0004252];tripeptidyl-peptidase activity [GO:0008240]	158	0	323.31	347820000000	1794	51.7	52.5	52.9	43.3	F4JVN6	F4JVN6	942	TPP2	Tripeptidyl-peptidase 2
309259929656982	30913064956665	315770015716553	311082401275635	L-lysine catabolic process [GO:0019477];response to karrikin [GO:0080167]	cytoplasm [GO:0005737];cytosol [GO:0005829]	saccharopine dehydrogenase (NADP+, L-lysine-forming) activity [GO:0047130];saccharopine dehydrogenase activity [GO:0004753]	62	0	253.6	13610000000	288	52.8	45.3	53.3	46.2	F4JVY8	F4JVY8	943	LKR	Lysine-ketoglutarate reductase/saccharopine dehydrogenase bifunctional enzyme
273902626037598	272375392913818	274398384094238	274715023040771	cinnamic acid biosynthetic process [GO:0009800];L-phenylalanine catabolic process [GO:0006559]	cytoplasm [GO:0005737]	phenylalanine ammonia-lyase activity [GO:0045548]	22	0	42.237	3333700000	67	18.8	19.1	17.8	17.9	F4JW69	F4JW69	944	PAL3	Phenylalanine ammonia-lyase
21124584197998	NaN	210817375183105	NaN		CCR4-NOT complex [GO:0030014]		20	0	127.61	5142700000	99	2.7	0	2.7	0	F4JWN4	F4JWN4	945	At5g18420	CCR4-NOT transcription complex subunit
279316253662109	281050453186035	281132678985596	273511066436768	lipid metabolic process [GO:0006629]		phosphoric diester hydrolase activity [GO:0008081]	9	0	23.288	1333100000	38	29.9	26.3	29.9	30.4	F4JWX3	F4JWX3	948	GDPD2	PLC-like phosphodiesterases superfamily protein
NaN	247125091552734	250118007659912	NaN	microtubule-based movement [GO:0007018];trichome branching [GO:0010091]	cytoskeleton [GO:0005856];plasma membrane [GO:0005886]	ATP binding [GO:0005524];microtubule binding [GO:0008017];microtubule motor activity [GO:0003777];oxidoreductase activity [GO:0016491]	8	0	5.5901	1243000000	18	0	0.6	1.4	0	F4JXM5	F4JXM5	951	ZWI	Kinesin-like calmodulin-binding protein (ZWICHEL)
226326293945313	232000923156738	NaN	NaN	Golgi to endosome transport [GO:0006895]	cytosol [GO:0005829];plastid [GO:0009536]		26	0	89.259	4495300000	99	0.8	0.6	0	0	F4JXM9	F4JXM9	952	At5g65950	Trafficking protein particle complex subunit-like protein
229365921020508	235177326202393	244202766418457	246955108642578	intracellular protein transport [GO:0006886];vesicle-mediated transport [GO:0016192]	AP-4 adaptor complex [GO:0030124];clathrin adaptor complex [GO:0030131]	clathrin binding [GO:0030276]	30	0	164.79	6479500000	149	4.5	3.5	4.5	6.2	F4JXV9	F4JXV9	953	At5g11490	Beta-adaptin-like protein
23250883102417	NaN	238796081542969	24001184463501		integral component of membrane [GO:0016021]		4	0	3.2632	274220000	9	1.1	0	1.8	1.8	F4JXY5	F4JXY5	955	At5g11700	Ephrin type-B receptor
272915821075439	273541374206543	276381683349609	278770122528076	embryo development ending in seed dormancy [GO:0009793];folic acid-containing compound biosynthetic process [GO:0009396];one-carbon metabolic process [GO:0006730];tetrahydrofolate biosynthetic process [GO:0046654]	cytoplasm [GO:0005737];cytosol [GO:0005829];mitochondrial matrix [GO:0005759];mitochondrion [GO:0005739]	ATP binding [GO:0005524];dihydrofolate synthase activity [GO:0008841];metal ion binding [GO:0046872];tetrahydrofolylpolyglutamate synthase activity [GO:0004326]	10	0	34.945	3433000000	59	13.4	13.4	15.5	15.7	F4JYE9	F4JYE9	959	DHFS	Dihydrofolate synthetase
243970851898193	245433311462402	NaN	250907135009766	N-glycan processing [GO:0006491];protein deglycosylation [GO:0006517]	cytoplasm [GO:0005737];cytosol [GO:0005829];vacuole [GO:0005773]	mannosyl-glycoprotein endo-beta-N-acetylglucosaminidase activity [GO:0033925]	12	0	15.384	2293000000	46	3.2	3.2	0	1.8	F4JZC2	F4JZC2	963	ENGASE1	Cytosolic endo-beta-N-acetylglucosaminidase 1
225757942199707	233091087341309	221314144134521	232502613067627	abscisic acid-activated signaling pathway [GO:0009738];cellular response to abscisic acid stimulus [GO:0071215];positive regulation of abscisic acid-activated signaling pathway [GO:0009789];regulation of protein import into nucleus [GO:0042306];response to abscisic acid [GO:0009737];response to osmotic stress [GO:0006970]	cytoskeleton [GO:0005856];cytosol [GO:0005829];plasma membrane [GO:0005886];plastid [GO:0009536];vacuolar membrane [GO:0005774];vacuole [GO:0005773]	actin binding [GO:0003779]	65	0	316.69	13433000000	214	3	2.4	3.7	4	F4JZY1	F4JZY1	966	CIP1	COP1-interactive protein 1
313867931365967	315126285552979	315061626434326	315639266967773		cytoplasm [GO:0005737];cytosol [GO:0005829];mitochondrion [GO:0005739];nucleus [GO:0005634];plastid [GO:0009536]	hydrolase activity [GO:0016787]	36	0	283.32	60849000000	581	71	78.8	77.5	75.3	F4K000	F4K000	968	MJC20.7	Metal-dependent protein hydrolase
278634281158447	277504062652588	28145450592041	27568265914917	carbohydrate metabolic process [GO:0005975]		hydrolase activity, hydrolyzing O-glycosyl compounds [GO:0004553]	10	0	72.001	7065500000	54	13.7	18.7	18.2	18	F4K020	F4K020	969	BG_PPAP	Beta-1,3-glucanase
285195713043213	286871910095215	285114879608154	282513313293457	tryptophan metabolic process [GO:0006568]		indole-3-glycerol-phosphate synthase activity [GO:0004425]	14	0	66.626	4494000000	124	40.4	40.4	35.4	32.1	F4K083	F4K083	970	MIF21.11	Aldolase-type TIM barrel family protein
28119068145752	265980415344238	280605430603027	279760723114014	cell plate assembly [GO:0000919];cytokinesis by cell plate formation [GO:0000911];early endosome to Golgi transport [GO:0034498];intra-Golgi vesicle-mediated transport [GO:0006891]	cytosol [GO:0005829];early endosome [GO:0005769];trans-Golgi network [GO:0005802];TRAPPII protein complex [GO:1990071]		39	0	176.52	14066000000	288	13.4	12.6	10.3	6.9	F4K0C4	F4K0C4	971	TRS130	Trafficking protein particle complex II-specific subunit 130 homolog
244434795379639	251386413574219	247954082489014	242870788574219	regulation of translational fidelity [GO:0006450]	cytoplasm [GO:0005737]	double-stranded RNA binding [GO:0003725];nucleotidyltransferase activity [GO:0016779];tRNA binding [GO:0000049]	3	0	7.388	533950000	9	10.1	8.3	4.2	2.4	F4K0E6	F4K0E6	972	MUP24.1	DHBP synthase RibB-like alpha/beta domain-containing protein
3014430809021	301158237457275	302160453796387	30256649017334	isopentenyl diphosphate biosynthetic process, methylerythritol 4-phosphate pathway [GO:0019288];response to bacterium [GO:0009617];systemic acquired resistance, salicylic acid mediated signaling pathway [GO:0009862];terpenoid biosynthetic process [GO:0016114]	chloroplast [GO:0009507];chloroplast envelope [GO:0009941];chloroplast stroma [GO:0009570];plastid [GO:0009536]	4 iron, 4 sulfur cluster binding [GO:0051539];4-hydroxy-3-methylbut-2-en-1-yl diphosphate synthase activity [GO:0046429];iron ion binding [GO:0005506]	48	0	323.31	26778000000	525	49.9	54	54.4	50.6	F4K0E8	F4K0E8	973	ISPG	4-hydroxy-3-methylbut-2-en-1-yl diphosphate synthase (ferredoxin), chloroplastic
285231647491455	280313892364502	293636932373047	286654987335205		chloroplast [GO:0009507]	nucleoside-triphosphate diphosphatase activity [GO:0047429]	10	0	49.93	4209400000	78	36.7	36.7	36.7	36.7	F4K0M7	F4K0M7	974	At5g66550	Maf-like protein
253429279327393	255671195983887	255256385803223	256036548614502	methylation [GO:0032259];vesicle-mediated transport [GO:0016192]	integral component of membrane [GO:0016021]	methyltransferase activity [GO:0008168];nucleic acid binding [GO:0003676]	11	0	45.82	2155600000	64	2.8	3	4.2	4.2	F4K0R0	F4K0R0	975	MOP10.11	Transducin family protein / WD-40 repeat family protein
264244632720947	258386993408203	264245281219482	268543605804443		chloroplast [GO:0009507];chloroplast envelope [GO:0009941];chloroplast stroma [GO:0009570]	hydrolase activity [GO:0016787]	11	0	19.485	1661200000	61	8.4	8.4	6.3	7.1	F4K1G7	F4K1G7	979	MEE13.8	P-loop containing nucleoside triphosphate hydrolases superfamily protein
288426303863525	289903717041016	289416770935059	289641380310059			oxidoreductase activity [GO:0016491]	22	0	85.722	9072500000	223	38.8	44	44.7	35.5	F4K1P8	F4K1P8	980	MJE7.7	FAD-dependent oxidoreductase family protein
187133731842041	NaN	186536502838135	NaN	mRNA destabilization [GO:0061157]	cytoplasm [GO:0005737]	mRNA binding [GO:0003729]	14	0	72.297	1741300000	41	1.8	0	1.8	3.2	F4K1Z0	F4K1Z0	981	ECT3	YTH domain-containing protein ECT3
258155307769775	266010208129883	252057552337646	NaN	histone modification [GO:0016570];transcription elongation from RNA polymerase II promoter [GO:0006368]	Cdc73/Paf1 complex [GO:0016593]		5	0	23.954	1686000000	13	3.7	3.7	5.6	0	F4K204	F4K204	982	VIP4	Leo1-like family protein
263702774047852	27405517578125	270026016235352	27058479309082				9	0	14.649	2001600000	32	1.1	2.5	2.5	2.5	F4K250	F4K250	983	MUD21.5	Ran-binding protein in the microtubule-organising centre protein
239547348022461	NaN	24811616897583	236742210388184	autophagosome assembly [GO:0000045];protein transport [GO:0015031]	autophagosome [GO:0005776];cytoplasmic vesicle [GO:0031410];phagophore assembly site [GO:0000407]		3	0.0032937	2.0212	282690000	3	4.2	0	4.2	4.2	F4K265	F4K265	984	ATG101	Autophagy-related protein 101
296067314147949	297687225341797	29607666015625	296048774719238	folic acid-containing compound biosynthetic process [GO:0009396];lignin biosynthetic process [GO:0009809];one-carbon metabolic process [GO:0006730];quiescent center organization [GO:1904961];root development [GO:0048364];root hair elongation [GO:0048767];root meristem growth [GO:0010449];tetrahydrofolylpolyglutamate biosynthetic process [GO:0046901]	chloroplast [GO:0009507];cytoplasm [GO:0005737];cytosol [GO:0005829];mitochondrion [GO:0005739]	ATP binding [GO:0005524];metal ion binding [GO:0046872];tetrahydrofolylpolyglutamate synthase activity [GO:0004326]	34	0	305.1	26226000000	383	35.4	38	43.1	43.1	F4K2A1;REV__Q9MB58	F4K2A1	985	FPGS1	Folylpolyglutamate synthase
NaN	NaN	233711910247803	257270488739014	defense response to fungus, incompatible interaction [GO:0009817];embryo development ending in seed dormancy [GO:0009793];gene expression [GO:0010467];mRNA splicing, via spliceosome [GO:0000398];positive regulation of protein-containing complex assembly [GO:0031334];positive regulation of RNA splicing [GO:0033120];primary miRNA processing [GO:0031053];RNA interference [GO:0016246];RNA splicing [G…	nucleus [GO:0005634];spliceosomal complex [GO:0005681]	ATP binding [GO:0005524];RNA binding [GO:0003723];RNA helicase activity [GO:0003724]	13	0	10.954	1085000000	30	0	0.6	0.8	2	F4K2E9	F4K2E9	986	CUV	Pre-mRNA-splicing factor ATP-dependent RNA helicase DEAH7
320229721069336	319578151702881	320650978088379	321139945983887		chloroplast [GO:0009507];cytosol [GO:0005829];plastid [GO:0009536]	serine-type peptidase activity [GO:0008236]	62	0	323.31	79933000000	860	58.6	56.6	56.3	51.2	F4K2Y3	F4K2Y3	987	MAB16.20	Alpha/beta-Hydrolases superfamily protein
279382591247559	28075870513916	279161586761475	281359920501709			nucleoside-triphosphate diphosphatase activity [GO:0047429]	16	0	32.916	5322200000	97	52.4	62.6	54.9	39.3	F4K331	F4K331	988	MJB21.15	Maf-like protein
301308727264404	301685390472412	30169376373291	303089962005615		chloroplast [GO:0009507];chloroplast stroma [GO:0009570]	5'-nucleotidase activity [GO:0008253];metal ion binding [GO:0046872]	35	0	240.76	17312000000	320	37.2	41	42.5	27.9	F4K3A9	F4K3A9	989	At5g48960	HAD-superfamily hydrolase, subfamily IG, 5'-nucleotidase
NaN	253367786407471	24536470413208	265970458984375			ATP binding [GO:0005524];ligase activity [GO:0016874];protein kinase activity [GO:0004672]	36	0	84.788	6430900000	119	0	0.8	1	1	F4K3Z6	F4K3Z6	991	KEG	Protein kinasesubiquitin-protein ligase
235615081787109	NaN	247933254241943	249986057281494	protein stabilization [GO:0050821];response to cold [GO:0009409];rRNA processing [GO:0006364]	chloroplast [GO:0009507];ribonucleoprotein complex [GO:1990904]	GTP binding [GO:0005525];GTPase activity [GO:0003924];translation elongation factor activity [GO:0003746]	19	0	69.388	2739500000	57	1.6	0	3.1	6.2	F4K410	F4K410	992	SVR3	Putative elongation factor TypA-like SVR3, chloroplastic
243911972045898	247838668823242	247677459716797	247142925262451				2	0	4.056	475440000	46	10.3	10.3	10.3	10.3	F4K464	F4K464	994	At5g20190	Tetratricopeptide repeat (TPR)-like superfamily protein
241768360137939	241731033325195	23098991394043	NaN	nuclear membrane organization [GO:0071763]	nuclear envelope [GO:0005635]		5	0	4.9608	408080000	14	1.7	1.7	2.2	1.8	F4K465	F4K465	995	At5g20200	Nucleoporin-like protein
317633514404297	320620765686035	316961917877197	316880416870117	cellular response to hypoxia [GO:0071456];response to cold [GO:0009409];response to karrikin [GO:0080167];response to oxidative stress [GO:0006979]	chloroplast [GO:0009507];cytosol [GO:0005829];plasmodesma [GO:0009506]	catalytic activity [GO:0003824];mRNA binding [GO:0003729]	55	0	282.51	23233000000	314	44.9	45.4	52.4	43.2	F4K470	F4K470	996	DIN10	Raffinose synthase family protein
281903705596924	286287441253662	286255435943604	289933452606201	DNA repair [GO:0006281]	plasmodesma [GO:0009506]	DNA polymerase binding [GO:0070182]	4	0	3.6628	4753000000	17	2.1	1.6	2.6	0.5	F4K4R1	F4K4R1	1001	At5g49110	Fanconi anemia group I-like protein
247179565429688	245342750549316	245439205169678	242291259765625	regulation of double-strand break repair [GO:2000779]	mitochondrion [GO:0005739];nucleus [GO:0005634];plastid [GO:0009536]	histone binding [GO:0042393]	14	0	27.127	2401300000	56	3.1	5.1	5.1	3.2	F4K4Y5	F4K4Y5	1002	MDF20.10	DEK domain-containing chromatin associated protein
317745475769043	315264987945557	317204093933105	317053260803223	protein catabolic process [GO:0030163];proteolysis [GO:0006508]	cell wall [GO:0005618]	aspartic-type endopeptidase activity [GO:0004190]	27	0	78.707	39559000000	304	36.5	40.7	38.7	41.1	F4K5B9	F4K5B9	1004	MOJ9.20	Eukaryotic aspartyl protease family protein
28469913482666	290156326293945	285417442321777	305289688110352	actin filament organization [GO:0007015];actin filament-based movement [GO:0030048];cell division [GO:0051301];fruit development [GO:0010154];Golgi localization [GO:0051645];gynoecium development [GO:0048467];leaf pavement cell development [GO:0090436];mitochondrion localization [GO:0051646];peroxisome localization [GO:0060151];post-embryonic development [GO:0009791];root hair cell tip growth [GO…	actin cytoskeleton [GO:0015629];cytoplasm [GO:0005737];myosin complex [GO:0016459];plasmodesma [GO:0009506];root hair tip [GO:0035619];transport vesicle [GO:0030133];vesicle [GO:0031982]	actin filament binding [GO:0051015];actin-dependent ATPase activity [GO:0030898];ATP binding [GO:0005524];calmodulin binding [GO:0005516];microfilament motor activity [GO:0000146];motor activity [GO:0003774]	65	0	205.6	15365000000	223	1.4	1.4	0.7	1.4	F4K5J1	F4K5J1	1005	XI-K	Myosin-17
257192363739014	255132808685303	254254398345947	255320167541504	cysteine biosynthetic process from serine [GO:0006535];cysteine homeostasis [GO:0080145];response to oxidative stress [GO:0006979];stress response to cadmium ion [GO:1990170]	cytoplasm [GO:0005737]	cystathionine gamma-lyase activity [GO:0004123];cysteine synthase activity [GO:0004124];L-cysteine desulfhydrase activity [GO:0080146];L-cystine L-cysteine-lyase (deaminating) [GO:0044540];pyridoxal phosphate binding [GO:0030170]	9	0.0022144	2.14	734820000	8	22.3	18.3	18.3	20.1	F4K5T2	F4K5T2	1008	DES1	Bifunctional cystathionine gamma-lyase/cysteine synthase
251494979858398	254772281646729	258120346069336	257320289611816				2	0.0064251	1.6469	392080000	12	0.9	0.9	0.9	0.9	F4K5Y6	F4K5Y6	1010	MNL12.14	COP1-interacting protein-like protein
272086238861084	278704433441162	277335681915283	276069602966309	defense response [GO:0006952];defense response to fungus [GO:0050832];defense response to insect [GO:0002213];response to wounding [GO:0009611]		serine-type endopeptidase inhibitor activity [GO:0004867]	7	0	40.128	1276400000	26	42.4	42.4	53.5	42.4	F4K627	F4K627	1011	UPI	Serine protease inhibitor, potato inhibitor I-type family protein
233554153442383	245390167236328	25613410949707	245056095123291		mitochondrion [GO:0005739];plastid [GO:0009536]	copper ion binding [GO:0005507];oxidoreductase activity [GO:0016491]	13	0	64.283	1900500000	51	5.9	11.7	15.1	9.5	F4K658	F4K658	1012	At5g49555	FAD/NAD(P)-binding oxidoreductase family protein
28832555770874	287552223205566	287846603393555	286438884735107			hydrolase activity [GO:0016787]	22	0	101.23	10597000000	163	16.2	23.2	14.6	22.6	F4K6N3	F4K6N3	1014	At5g07360	Amidase family protein
276281890869141	277869358062744	274973182678223	276461582183838		cell wall [GO:0005618];extracellular region [GO:0005576];plasmodesma [GO:0009506]	copper ion binding [GO:0005507];oxidoreductase activity [GO:0016491]	16	0	94.314	6057100000	126	21.9	18.5	21.3	18.9	F4K6Z5	F4K6Z5	1015	At5g21105	Plant L-ascorbate oxidase
24493444442749	236026363372803	236808891296387	23553092956543			RNA binding [GO:0003723]	12	0	33.021	1525700000	39	2.2	1	2.4	4	F4K703	F4K703	1016	LARP1a	LA RNA-binding protein
254447116851807	250423069000244	248859977722168	254532470703125	actin filament organization [GO:0007015];actin filament-based movement [GO:0030048];Golgi localization [GO:0051645];gynoecium development [GO:0048467];leaf pavement cell development [GO:0090436];mitochondrion localization [GO:0051646];peroxisome localization [GO:0060151];root hair elongation [GO:0048767];trichome morphogenesis [GO:0010090]	cytosol [GO:0005829];myosin complex [GO:0016459];peroxisome [GO:0005777]	actin binding [GO:0003779];ATP binding [GO:0005524];GTP-dependent protein binding [GO:0030742];motor activity [GO:0003774];Rab GTPase binding [GO:0017137]	31	0	101.76	4002300000	89	0.6	0.6	1.3	0.7	F4K7C5	F4K7C5	1018	MYA2	Myosin 2
247256717681885	243253288269043	245808963775635	246327285766602			kinase activity [GO:0016301];phosphotransferase activity, alcohol group as acceptor [GO:0016773]	3	0	6.9459	634690000	9	8.2	6	8.2	6.6	F4K7C7	F4K7C7	1019	At5g43910	PfkB-like carbohydrate kinase family protein
260077209472656	270760231018066	256687412261963	258666744232178			tRNA methyltransferase activity [GO:0008175]	2	0	3.0251	1482300000	11	13.1	13.1	13.1	13.1	F4K7Z6	F4K7Z6	1020	At5g01230	S-adenosyl-L-methionine-dependent methyltransferases superfamily protein
257951107025146	NaN	256989326477051	253163433074951	dephosphorylation of RNA polymerase II C-terminal domain [GO:0070940];developmental growth [GO:0048589];response to auxin [GO:0009733];response to osmotic stress [GO:0006970]		phosphatase activity [GO:0016791];RNA binding [GO:0003723];RNA polymerase II CTD heptapeptide repeat phosphatase activity [GO:0008420]	7	0	6.8518	1177900000	19	5.6	0	3.1	4	F4K802	F4K802	1021	CPL2	Carboxyl-terminal domain (Ctd) phosphatase-like 2
283731842041016	288302307128906	281944160461426	278118858337402	exocytosis [GO:0006887];protein transport [GO:0015031]	cytosol [GO:0005829];exocyst [GO:0000145];plasma membrane [GO:0005886]		13	0	19.333	8724200000	39	2.8	2.8	1.6	2.8	F4K8Y6	F4K8Y6	1023	EXO70F1	Exocyst subunit Exo70 family protein
240919246673584	23678955078125	242014999389648	241844234466553		plasmodesma [GO:0009506]		4	0	4.2855	324000000	8	2.2	2.2	2.2	2.2	F4K940	F4K940	1024	MIK19.5	Uncharacterized protein
248741302490234	248105392456055	259319515228271	260680465698242	protein phosphorylation [GO:0006468]	integral component of membrane [GO:0016021];plasma membrane [GO:0005886]	ATP binding [GO:0005524];transmembrane receptor protein serine/threonine kinase activity [GO:0004675]	6	0	16.801	1154600000	29	4.2	2.7	2.7	2.7	F4K946	F4K946	1025	At5g56890	Protein kinase superfamily protein
259573726654053	251382904052734	261362762451172	254233570098877		cytoplasm [GO:0005737];cytosol [GO:0005829];nucleus [GO:0005634]	zinc ion binding [GO:0008270]	17	0	130.29	4807300000	84	9.9	4.5	12.4	5.3	F4K9W6	F4K9W6	1027	MQJ16.2	ZPR1 zinc-finger domain protein
339346466064453	335144157409668	347032661437988	347154350280762	carbon fixation [GO:0015977];photorespiration [GO:0009853];photosynthesis [GO:0015979]	chloroplast [GO:0009507]	monooxygenase activity [GO:0004497];ribulose-bisphosphate carboxylase activity [GO:0016984]	26	0	323.31	247850000000	378	67.2	67.2	67.2	67.2	F4KA76	F4KA76	1031	RBCS3B	Ribulose bisphosphate carboxylase small chain
25756311416626	259126224517822	261356506347656	260735321044922	methylation [GO:0032259]		methyltransferase activity [GO:0008168]	4	0	5.5611	761750000	22	7.8	6.3	13.5	6.3	F4KAB4	F4KAB4	1032	At5g44600	S-adenosyl-L-methionine-dependent methyltransferases superfamily protein
310056438446045	310430297851563	311608085632324	312335796356201	DNA replication initiation [GO:0006270];DNA unwinding involved in DNA replication [GO:0006268];double-strand break repair via break-induced replication [GO:0000727];mitotic DNA replication [GO:1902969];pre-replicative complex assembly involved in nuclear cell cycle DNA replication [GO:0006267]	MCM complex [GO:0042555];nucleus [GO:0005634];THO complex [GO:0000347]	ATP binding [GO:0005524];DNA helicase activity [GO:0003678];DNA replication origin binding [GO:0003688];metal ion binding [GO:0046872];single-stranded DNA binding [GO:0003697]	14	0	19.514	59833000000	48	2.5	2.5	2.5	2.5	F4KAB8	F4KAB8	1033	MCM6	DNA replication licensing factor MCM6
258062171936035	253974456787109	2585910987854	254562282562256			syntaxin binding [GO:0019905]	4	0.0034722	1.9861	671780000	8	6.2	6.2	8.9	6.7	F4KAG0	F4KAG0	1034	At5g50840	Alpha-taxilin-like protein
246678485870361	243684635162354	247603530883789	245578899383545		chloroplast [GO:0009507]		2	0	5.7179	343380000	14	10.3	10.3	10.3	10.3	F4KAK0	F4KAK0	1035	MUL3.12	Tautomerase/MIF superfamily protein
288554019927979	289342422485352	276583995819092	287863121032715	cell morphogenesis [GO:0000902]	cell cortex [GO:0005938];plasma membrane [GO:0005886];site of polarized growth [GO:0030427]		16	0	30.506	6393700000	57	0.9	1.3	1.9	0.9	F4KB73	F4KB73	1036	At5g15680	ARM repeat superfamily protein
290898742675781	29033203125	292667808532715	296213035583496	fatty acid metabolic process [GO:0006631]	peroxisome [GO:0005777]	ligase activity [GO:0016874]	29	0	142.02	7547900000	157	32.3	26.8	33.6	30.8	F4KBF3	F4KBF3	1037	AAE17	Probable acyl-activating enzyme 17, peroxisomal
279294261932373	287702674865723	280753593444824	281402912139893	tetrahydrobiopterin biosynthetic process [GO:0006729]		4-alpha-hydroxytetrahydrobiopterin dehydratase activity [GO:0008124]	10	0	135.17	6769900000	103	51.8	45.1	52.3	24.9	F4KBV0	F4KBV0	1039	MWD22.5	Transcriptional coactivator/pterin dehydratase
271664333343506	277422695159912	274034881591797	NaN	defense response to fungus [GO:0050832];protein ubiquitination [GO:0016567];regulation of lipid catabolic process [GO:0050994];regulation of seed germination [GO:0010029];response to abscisic acid [GO:0009737];ubiquitin-dependent protein catabolic process [GO:0006511];ubiquitin-dependent protein catabolic process via the N-end rule pathway [GO:0071596]	cytoplasm [GO:0005737];ubiquitin ligase complex [GO:0000151]	ubiquitin protein ligase activity [GO:0061630];ubiquitin-protein transferase activity [GO:0004842];zinc ion binding [GO:0008270]	14	0	11.326	4419700000	41	2.7	2.7	2.1	0	F4KCC2	F4KCC2	1041	PRT6	E3 ubiquitin-protein ligase PRT6
249124164581299	246258907318115	247479629516602	NaN		U5 snRNP [GO:0005682]		2	0	7.6761	416570000	11	3.7	3.7	3.7	0	F4KCL2	F4KCL2	1043	At5g09390	CD2-binding protein-like protein
237012348175049	237568454742432	231684589385986	NaN		plasma membrane [GO:0005886]		1	0.0071073	1.5844	242880000	10	2.9	2.9	2.9	0	F4KCX6	F4KCX6	1045	MQM1.23	Uncharacterized protein
284859657287598	283548107147217	28107292175293	282863464355469		apoplast [GO:0048046];cell wall [GO:0005618]	manganese ion binding [GO:0030145];nutrient reservoir activity [GO:0045735]	3	0	8.2068	1638800000	38	24.5	24.5	24.5	24.5	F4KD16	F4KD16	1046	At5g39160	Germin-like protein
276381683349609	276041355133057	278117637634277	277091197967529			hydrolase activity [GO:0016787]	11	0	44.196	2761100000	92	28.5	36.9	35	35	F4KDK1	F4KDK1	1047	MCK7.7	Calcineurin-like metallo-phosphoesterase superfamily protein
3087034034729	307173480987549	304370822906494	307801132202148	embryo development ending in seed dormancy [GO:0009793];tRNA aminoacylation for protein translation [GO:0006418];valyl-tRNA aminoacylation [GO:0006438]	chloroplast [GO:0009507];chloroplast stroma [GO:0009570];cytosol [GO:0005829];mitochondrion [GO:0005739]	aminoacyl-tRNA editing activity [GO:0002161];ATP binding [GO:0005524];valine-tRNA ligase activity [GO:0004832]	59	0	179.82	21709000000	464	43.7	41.8	42.6	38.1	F4KE63	F4KE63	1048	EMB2247	Valine--tRNA ligase, chloroplastic/mitochondrial 2
256243305206299	256782035827637	264070587158203	261351413726807	intracellular signal transduction [GO:0035556];peptidyl-serine phosphorylation [GO:0018105]	cytosol [GO:0005829]	ATP binding [GO:0005524];kinase activity [GO:0016301];protein serine/threonine kinase activity [GO:0004674]	10	0	81.702	2250700000	32	4.7	5.4	1.6	1.6	F4KFD4	F4KFD4	1052	MYH9.10	Non-specific serine/threonine protein kinase
27566162109375	278496570587158	27619119644165	277589435577393	thiamine biosynthetic process [GO:0009228]	cytosol [GO:0005829];mitochondrion [GO:0005739]	thiaminase activity [GO:0050334];thiamine phosphate phosphatase activity [GO:0042131]	19	0	47.515	5220800000	138	17.2	14.3	15.9	18.6	F4KFT7	F4KFT7	1053	TH2	Bifunctional TH2 protein, mitochondrial
289000911712646	291464939117432	290464820861816	292188186645508			serine-type endopeptidase activity [GO:0004252]	23	0	122.51	13000000000	187	38	42.2	38.7	43.5	F4KFV6	F4KFV6	1054	DEG8	Trypsin family protein with PDZ domain-containing protein
296257343292236	29630220413208	297554607391357	297028102874756		nucleolus [GO:0005730];plastid [GO:0009536]	GTP binding [GO:0005525];GTPase activity [GO:0003924]	58	0	257.86	19885000000	401	23.3	34.2	32	21.6	F4KG14	F4KG14	1056	MCL19.12	Guanylate-binding family protein
284275035858154	278820953369141	285994968414307	282691898345947	fructose 1,6-bisphosphate metabolic process [GO:0030388];gluconeogenesis [GO:0006094];glycolytic process [GO:0006096]	cytosol [GO:0005829]	fructose-bisphosphate aldolase activity [GO:0004332]	21	0	27.497	4169900000	84	23.4	28.2	36.1	38.9	F4KGQ0	F4KGQ0	1059	FBA4	Fructose-bisphosphate aldolase 4, cytosolic
325444602966309	327555313110352	325972366333008	325588302612305	lytic vacuole organization [GO:0080171]	chloroplast [GO:0009507];cytosol [GO:0005829];plasma membrane [GO:0005886]	kinase activity [GO:0016301]	189	0	323.31	80738000000	1399	55.4	54.8	57.3	55.3	F4KHD5	F4KHD5	1060	MPO12.160	A-kinase anchor-like protein
269680709838867	268432598114014	264351558685303	265821895599365		chloroplast thylakoid lumen [GO:0009543];thylakoid lumen [GO:0031977]	endopeptidase activity [GO:0004175];serine-type peptidase activity [GO:0008236]	24	0	88.135	5671600000	124	15.1	19	13.1	10.4	F4KHG6	F4KHG6	1061	CTPA1	Carboxyl-terminal-processing peptidase 1, chloroplastic
NaN	236353340148926	NaN	235512161254883			serine-type endopeptidase activity [GO:0004252]	19	0	70.618	3623200000	108	0	1.4	0	1.4	F4KHS1	F4KHS1	1063	SBT4.12	Subtilase 4.12
275808238983154	279352836608887	275351943969727	277311096191406	D-serine biosynthetic process [GO:0070179];L-serine biosynthetic process [GO:0006564]		phosphatase activity [GO:0016791];phosphoserine phosphatase activity [GO:0004647]	21	0	79.614	4822700000	75	4.2	4.2	4.2	4.2	F4KI56	F4KI56	1064	IPSP	Metal-independent phosphoserine phosphatase
243974781036377	264352836608887	21628719329834	21865140914917	pollen development [GO:0009555]	plasma membrane [GO:0005886];plastid [GO:0009536]		55	0	317.84	17026000000	281	2.1	1.5	2.6	3.3	F4KIH8	F4KIH8	1066	MXC17.10	Transducin/WD40 repeat-like superfamily protein
253329601287842	252700290679932	251686725616455	261607532501221	autophagosome assembly [GO:0000045];autophagy of mitochondrion [GO:0000422];autophagy of nucleus [GO:0044804];autophagy of peroxisome [GO:0030242];defense response to bacterium, incompatible interaction [GO:0009816];defense response to fungus [GO:0050832];leaf senescence [GO:0010150];protein transport [GO:0015031]	extrinsic component of membrane [GO:0019898];phagophore assembly site [GO:0000407]		9	0	7.8369	1405100000	14	1.1	0.6	0.6	1.1	F8S296	F8S296	1070	ATG2	Autophagy-related protein 2
386109809875488	385866508483887	386441345214844	386022605895996	photorespiration [GO:0009853];reductive pentose-phosphate cycle [GO:0019253];response to abscisic acid [GO:0009737];response to cadmium ion [GO:0046686]	apoplast [GO:0048046];cell wall [GO:0005618];chloroplast [GO:0009507];chloroplast envelope [GO:0009941];chloroplast stroma [GO:0009570];chloroplast thylakoid membrane [GO:0009535];cytosolic ribosome [GO:0022626];plastid [GO:0009536];plastoglobule [GO:0010287];thylakoid [GO:0009579]	magnesium ion binding [GO:0000287];monooxygenase activity [GO:0004497];ribulose-bisphosphate carboxylase activity [GO:0016984]	97	0	323.31	5541200000000	9549	77.7	76.6	77.7	77.7	O03042;REV__Q9FRK9	O03042	1072	rbcL	Ribulose bisphosphate carboxylase large chain
254674663543701	269321327209473	261895217895508	2560085105896	defense response to fungus [GO:0050832];response to desiccation [GO:0009269];response to high light intensity [GO:0009644];response to wounding [GO:0009611]	cytosol [GO:0005829]		8	0	20.277	3147200000	21	16.6	20.5	34.4	33.1	O03983	O03983	1073	LEA14	Probable desiccation-related protein LEA14
240641460418701	210874481201172	234661273956299	2386012840271	cellular response to heat [GO:0034605];protein folding [GO:0006457];protein stabilization [GO:0050821]	apoplast [GO:0048046];cell surface [GO:0009986];cell wall [GO:0005618];chloroplast stroma [GO:0009570];cytoplasm [GO:0005737];cytosol [GO:0005829];Golgi apparatus [GO:0005794];nucleus [GO:0005634];perinuclear region of cytoplasm [GO:0048471];plasma membrane [GO:0005886];plastid [GO:0009536];protein-containing complex [GO:0032991];vacuolar membrane [GO:0005774]	ATP binding [GO:0005524];unfolded protein binding [GO:0051082]	114	0	106.75	7273700000	94	65.4	59.8	65.1	63.5	O03986	O03986	1074	HSP90-4	Heat shock protein 90-4
233591747283936	240816402435303	NaN	NaN	embryo sac development [GO:0009553];glucose mediated signaling pathway [GO:0010255];pollen development [GO:0009555];positive regulation of RNA polymerase II transcription preinitiation complex assembly [GO:0045899];proteasomal protein catabolic process [GO:0010498];regulation of transcription by RNA polymerase II [GO:0006357]	cytosol [GO:0005829];extracellular region [GO:0005576];nucleus [GO:0005634];plasma membrane [GO:0005886];proteasome complex [GO:0000502];proteasome regulatory particle, base subcomplex [GO:0008540];protein-containing complex [GO:0032991]	ATP binding [GO:0005524];hydrolase activity [GO:0016787]	37	0	27.211	1334400000	23	12.5	17	6.4	5.7	O04019	O04019	1075	RPT5B	26S proteasome regulatory subunit 6A homolog B
280802993774414	281192169189453	27929988861084	282589416503906	cellular response to hypoxia [GO:0071456];protein targeting to vacuole [GO:0006623]	endoplasmic reticulum [GO:0005783];endoplasmic reticulum membrane [GO:0005789];extracellular region [GO:0005576];integral component of membrane [GO:0016021];plasma membrane [GO:0005886];protein storage vacuole [GO:0000326];protein storage vacuole membrane [GO:0032586]		10	0	27.361	2870800000	33	27.5	24.7	18.5	21.9	O04023	O04023	1076	SRC2	Protein SRC2 homolog
256286754608154	257497024536133	257984027862549	257350540161133			phosphatase activity [GO:0016791]	5	0	24.859	781070000	15	17.8	12.1	17.8	17.8	O04035	O04035	1077	At1g08940	Phosphoglycerate mutase-like protein AT74H
295654354095459	295405254364014	290201969146729	289409217834473	response to karrikin [GO:0080167]	chloroplast [GO:0009507];chloroplast stroma [GO:0009570]	2 iron, 2 sulfur cluster binding [GO:0051537];electron transfer activity [GO:0009055];metal ion binding [GO:0046872]	4	0	99.936	6886900000	46	57.4	57.4	57.4	57.4	O04090	O04090	1078	FD1	Ferredoxin-1, chloroplastic
257851657867432	238999366760254	255508937835693	257977848052979	cellular amino acid metabolic process [GO:0006520];L-serine biosynthetic process [GO:0006564]	chloroplast [GO:0009507];chloroplast stroma [GO:0009570];cytosol [GO:0005829];nucleus [GO:0005634]	NAD binding [GO:0051287];phosphoglycerate dehydrogenase activity [GO:0004617]	46	0	323.31	58198000000	523	16.2	9	12.7	12.5	O04130	O04130	1079	PGDH2	D-3-phosphoglycerate dehydrogenase 2, chloroplastic
25497257232666	254670314788818	26566234588623	266907253265381	cyclic nucleotide metabolic process [GO:0009187];tRNA splicing, via endonucleolytic cleavage and ligation [GO:0006388]	cytoplasm [GO:0005737];cytosol [GO:0005829]	2',3'-cyclic-nucleotide 3'-phosphodiesterase activity [GO:0004113]	12	0	63.714	3876700000	73	23.8	18.2	43.1	22.7	O04147	O04147	1080	At4g18930	Cyclic phosphodiesterase
309296646118164	311130313873291	309230899810791	309093494415283	endoplasmic reticulum unfolded protein response [GO:0030968];protein folding [GO:0006457];response to cadmium ion [GO:0046686];response to endoplasmic reticulum stress [GO:0034976];response to oxidative stress [GO:0006979]	endoplasmic reticulum [GO:0005783];endoplasmic reticulum lumen [GO:0005788];endoplasmic reticulum membrane [GO:0005789];mitochondrion [GO:0005739];nucleus [GO:0005634];plasmodesma [GO:0009506];secretory vesicle [GO:0099503];vacuolar membrane [GO:0005774]	calcium ion binding [GO:0005509];carbohydrate binding [GO:0030246];unfolded protein binding [GO:0051082]	60	0	323.31	68793000000	612	70.1	70.8	77.6	61.9	O04151	O04151	1081	CRT1	Calreticulin-1
308628234863281	308026275634766	307554931640625	306111373901367	anthocyanin-containing compound metabolic process [GO:0046283];defense response to bacterium [GO:0042742];endoplasmic reticulum unfolded protein response [GO:0030968];innate immune response-activating signal transduction [GO:0002758];plant-type hypersensitive response [GO:0009626];protein folding [GO:0006457]	endoplasmic reticulum [GO:0005783];endoplasmic reticulum lumen [GO:0005788];endoplasmic reticulum membrane [GO:0005789];extracellular region [GO:0005576]	calcium ion binding [GO:0005509];carbohydrate binding [GO:0030246];unfolded protein binding [GO:0051082]	46	0	323.31	46355000000	499	53.3	57.1	64.2	47.4	O04153	O04153	1082	CRT3	Calreticulin-3
27730525970459	275117893218994	277912273406982	274224586486816	amylopectin biosynthetic process [GO:0010021];starch biosynthetic process [GO:0019252];starch catabolic process [GO:0005983]	chloroplast [GO:0009507];chloroplast isoamylase complex [GO:0010368]	isoamylase activity [GO:0019156]	17	0	45.334	6896200000	81	6.5	7.8	7.8	10.5	O04196	O04196	1084	ISA1	Isoamylase 1, chloroplastic
266466388702393	268883228302002	274310150146484	27457950592041	anther dehiscence [GO:0009901];defense response [GO:0006952];defense response to bacterium [GO:0042742];defense response to fungus [GO:0050832];extracellular ATP signaling [GO:0106167];jasmonic acid and ethylene-dependent systemic resistance [GO:0009861];jasmonic acid mediated signaling pathway [GO:0009867];negative regulation of defense response [GO:0031348];protein ubiquitination [GO:0016567];r…			12	0	20.518	3476800000	56	9.8	6.4	14	8.6	O04197	O04197	1085	COI1	Coronatine-insensitive protein 1
222729568481445	225681343078613	215961875915527	22987232208252	embryo development ending in seed dormancy [GO:0009793];formation of cytoplasmic translation initiation complex [GO:0001732];pollen germination [GO:0009846];response to sucrose [GO:0009744];translational initiation [GO:0006413]	cytoplasm [GO:0005737];cytosol [GO:0005829];eukaryotic 43S preinitiation complex [GO:0016282];eukaryotic 48S preinitiation complex [GO:0033290];eukaryotic translation initiation factor 3 complex, eIF3m [GO:0071541];Golgi apparatus [GO:0005794];nucleus [GO:0005634]	translation initiation factor activity [GO:0003743];translation initiation factor binding [GO:0031369]	18	0	323.31	38445000000	175	11.9	18.1	18.4	27.3	O04202	O04202	1086	TIF3F1	Eukaryotic translation initiation factor 3 subunit F
NaN	238083305358887	237140827178955	231015892028809	clathrin coat assembly [GO:0048268];clathrin-dependent endocytosis [GO:0072583];intracellular protein transport [GO:0006886]	cell plate [GO:0009504];chloroplast envelope [GO:0009941];clathrin coat of coated pit [GO:0030132];clathrin coat of trans-Golgi network vesicle [GO:0030130];clathrin vesicle coat [GO:0030125];cytoskeleton [GO:0005856];Golgi apparatus [GO:0005794];phragmoplast [GO:0009524];plasma membrane [GO:0005886]	clathrin heavy chain binding [GO:0032050];identical protein binding [GO:0042802];structural molecule activity [GO:0005198]	17	0	61.75	3267400000	61	0	3.9	3.9	3.1	O04209	O04209	1087	CLC2	Clathrin light chain 2
261682720184326	266868572235107	259523811340332	262742290496826	defense response [GO:0006952];NLS-bearing protein import into nucleus [GO:0006607]	cytosol [GO:0005829];host cell nucleus [GO:0042025];nucleus [GO:0005634]	nuclear import signal receptor activity [GO:0061608];nuclear localization sequence binding [GO:0008139]	23	0	80.634	3075200000	66	16	20	14.7	15.4	O04294	O04294	1089	IMPA3	Importin subunit alpha-3
317242774963379	317406139373779	317629947662354	316231384277344	response to cold [GO:0009409];response to jasmonic acid [GO:0009753];response to wounding [GO:0009611];vegetative to reproductive phase transition of meristem [GO:0010228]	chloroplast [GO:0009507];cytosol [GO:0005829];nucleus [GO:0005634];plasmodesma [GO:0009506];vacuole [GO:0005773]	carbohydrate binding [GO:0030246]	44	0	323.31	75959000000	657	92	84.9	97.1	96.7	O04309	O04309	1091	JAL35	Jacalin-related lectin 35
261005706787109	280063514709473	278770713806152	284693698883057	response to cold [GO:0009409]	cytosol [GO:0005829];nucleus [GO:0005634];plasmodesma [GO:0009506]	carbohydrate binding [GO:0030246];copper ion binding [GO:0005507]	54	0	323.31	110140000000	593	22.1	25.8	28.2	29.1	O04310	O04310	1092	JAL34	Jacalin-related lectin 34
228822803497314	252400169372559	229444770812988	216704235076904	response to cold [GO:0009409];response to zinc ion [GO:0010043]	nucleus [GO:0005634];plasmodesma [GO:0009506]	carbohydrate binding [GO:0030246]	40	0	323.31	66403000000	407	10.3	2.3	10.3	9	O04311	O04311	1093	JAL33	Jacalin-related lectin 33
287938346862793	286654319763184	287886791229248	NaN		cytosol [GO:0005829]	carbohydrate binding [GO:0030246];copper ion binding [GO:0005507]	30	0	279.61	23227000000	138	8.4	12.5	11.5	10.1	O04313	O04313	1094	PBP2	PYK10-binding protein 2
291973476409912	29247465133667	293800354003906	293016014099121	protein folding [GO:0006457];regulation of hydrolase activity [GO:0051336]	cytosol [GO:0005829];nucleus [GO:0005634];plasmodesma [GO:0009506]	carbohydrate binding [GO:0030246];copper ion binding [GO:0005507];enzyme regulator activity [GO:0030234]	44	0	323.31	291210000000	759	60.4	55.7	52.3	69.5	O04314	O04314	1095	PBP1	PYK10-binding protein 1
314241237640381	31338357925415	314208145141602	311850624084473	glucosinolate catabolic process [GO:0019762];nitrile biosynthetic process [GO:0080028]	cytosol [GO:0005829];nucleus [GO:0005634];plasmodesma [GO:0009506]	carbohydrate binding [GO:0030246];enzyme regulator activity [GO:0030234]	68	0	323.31	377270000000	981	32.6	29.9	36	36.7	O04316	O04316	1096	NSP4	Nitrile-specifier protein 4
277773723602295	292566032409668	289732284545898	294059238433838	glucosinolate catabolic process [GO:0019762];nitrile biosynthetic process [GO:0080028]	chloroplast [GO:0009507];cytosol [GO:0005829];nucleus [GO:0005634]	carbohydrate binding [GO:0030246];enzyme regulator activity [GO:0030234]	31	0	277.51	14064000000	125	12	12.8	12	12	O04318	O04318	1097	NSP3	Nitrile-specifier protein 3
287828483581543	288527851104736	288629570007324	289088478088379	auxin metabolic process [GO:0009850];response to wounding [GO:0009611]	endoplasmic reticulum [GO:0005783];endoplasmic reticulum lumen [GO:0005788];nucleus [GO:0005634];plasma membrane [GO:0005886]	hydrolase activity [GO:0016787];IAA-Ala conjugate hydrolase activity [GO:0010179];metal ion binding [GO:0046872]	28	0	312.95	19594000000	277	43.2	35.7	38	41.4	O04373	O04373	1098	ILL4	IAA-amino acid hydrolase ILR1-like 4
264462108612061	262235584259033	264852046966553	267184257507324	brassinosteroid mediated signaling pathway [GO:0009742];megasporogenesis [GO:0009554];meiotic sister chromatid cohesion [GO:0051177];microsporogenesis [GO:0009556];protein dephosphorylation [GO:0006470];regulation of protein autophosphorylation [GO:0031952]	cytoplasm [GO:0005737];cytosol [GO:0005829];nucleus [GO:0005634];protein phosphatase type 2A complex [GO:0000159]	protein phosphatase activator activity [GO:0072542]	11	0	11.399	2855100000	56	12.2	9.6	12	7.4	O04376	O04376	1099	B'BETA	Serine/threonine protein phosphatase 2A 57 kDa regulatory subunit B' beta isoform
292702827453613	291038455963135	292737770080566	292809829711914	adaxial/abaxial pattern specification [GO:0009955];adventitious root development [GO:0048830];auxin metabolic process [GO:0009850];cell differentiation [GO:0030154];defense response to virus [GO:0051607];gene silencing by miRNA [GO:0035195];innate immune response [GO:0045087];leaf morphogenesis [GO:0009965];leaf proximal/distal pattern formation [GO:0010589];leaf vascular tissue pattern formation…	cytoplasm [GO:0005737];cytosol [GO:0005829];nucleus [GO:0005634]	endoribonuclease activity [GO:0004521];metal ion binding [GO:0046872];miRNA binding [GO:0035198];mRNA binding [GO:0003729]	37	0	111.99	15933000000	279	18.8	22.9	22.6	22.6	O04379	O04379	1100	2001-08-01	Protein argonaute 1
293626270294189	292720642089844	292403163909912	291794967651367	peroxisome organization [GO:0007031];purine nucleobase metabolic process [GO:0006144];urate catabolic process [GO:0019628]	cytosol [GO:0005829];peroxisome [GO:0005777]	urate oxidase activity [GO:0004846]	29	0	211.36	14843000000	266	49.8	54.7	51.8	49.5	O04420	O04420	1101	At2g26230	Uricase
299601650238037	297795658111572	300090522766113	299366321563721	protein folding [GO:0006457]	chaperonin-containing T-complex [GO:0005832];cytosol [GO:0005829];nucleus [GO:0005634];plasma membrane [GO:0005886];plasmodesma [GO:0009506]	ATP binding [GO:0005524];unfolded protein binding [GO:0051082]	60	0	323.31	53403000000	473	43.7	36.3	45.6	32.3	O04450	O04450	1103	CCT5	T-complex protein 1 subunit epsilon
26228796005249	266187686920166	267296199798584	267987232208252	protein deubiquitination [GO:0016579];shoot system morphogenesis [GO:0010016];ubiquitin-dependent protein catabolic process [GO:0006511]	cytoplasm [GO:0005737];nucleus [GO:0005634]	thiol-dependent ubiquitin-specific protease activity [GO:0004843]	12	0	16.07	3225000000	80	17.3	15.8	10.9	15.5	O04482	O04482	1104	UCH2	Ubiquitin carboxyl-terminal hydrolase 2
325234184265137	324748916625977	32525520324707	324614143371582		cytosol [GO:0005829];extracellular region [GO:0005576];plasma membrane [GO:0005886];plasmodesma [GO:0009506];vacuole [GO:0005773]	translation elongation factor activity [GO:0003746]	55	0	323.31	133640000000	880	68.4	67.4	68.6	68.6	O04487	O04487	1106	At1g09640	Probable elongation factor 1-gamma 1
340123023986816	34137134552002	341302452087402	341786804199219	protein catabolic process [GO:0030163];proteolysis [GO:0006508];regulation of programmed cell death [GO:0043067];systemic acquired resistance [GO:0009627]	apoplast [GO:0048046];cell wall [GO:0005618];secretory vesicle [GO:0099503]	aspartic-type endopeptidase activity [GO:0004190];nucleotide binding [GO:0000166]	20	0	323.31	193030000000	481	36.3	36.3	36.3	36.3	O04496	O04496	1108	AED3	Aspartyl protease AED3
341401824951172	341339225769043	340012702941895	339527206420898	cellular carbohydrate metabolic process [GO:0044262];glucose catabolic process [GO:0006007];glycolytic process [GO:0006096];pollen development [GO:0009555];response to cadmium ion [GO:0046686];response to cold [GO:0009409];stomatal movement [GO:0010118]	chloroplast [GO:0009507];cytosol [GO:0005829];extracellular region [GO:0005576];mitochondrial envelope [GO:0005740];plasma membrane [GO:0005886];plasmodesma [GO:0009506]	2,3-bisphosphoglycerate-independent phosphoglycerate mutase activity [GO:0046537];manganese ion binding [GO:0030145]	86	0	323.31	568080000000	2488	98	98	97.1	98.2	O04499	O04499	1109	PGM1	2,3-bisphosphoglycerate-independent phosphoglycerate mutase 1
268929595947266	268095588684082	270737781524658	271759796142578		cytosol [GO:0005829]		12	0	37.106	3230700000	64	27.9	18.5	15.3	15.3	O04551	O04551	1111	At1g27020	Plant/protein
256926937103271	255238170623779	255961647033691	249206161499023	ribosomal large subunit assembly [GO:0000027];translation [GO:0006412]	chloroplast [GO:0009507];chloroplast envelope [GO:0009941];chloroplast stroma [GO:0009570];cytosol [GO:0005829];cytosolic ribosome [GO:0022626]	RNA binding [GO:0003723];rRNA binding [GO:0019843];structural constituent of ribosome [GO:0003735]	4	0.00094162	2.4944	467490000	8	7.3	10.3	10.3	13.4	O04603	O04603	1112	RPL5	50S ribosomal protein L5, chloroplastic
258668155670166	255332946777344	255478668212891	253393630981445		Golgi apparatus [GO:0005794];integral component of membrane [GO:0016021]	O-acetyltransferase activity [GO:0016413]	12	0	61.226	2615500000	65	9	16.1	9	3.8	O04621	O04621	1113	TBL26	Protein trichome birefringence-like 26
308340950012207	308079319000244	308916435241699	309374027252197	threonyl-tRNA aminoacylation [GO:0006435];tRNA aminoacylation for protein translation [GO:0006418]	cell wall [GO:0005618];chloroplast [GO:0009507];cytosol [GO:0005829];mitochondrion [GO:0005739];plasma membrane [GO:0005886];plastid [GO:0009536]	aminoacyl-tRNA ligase activity [GO:0004812];ATP binding [GO:0005524];metal ion binding [GO:0046872];threonine-tRNA ligase activity [GO:0004829]	82	0	323.31	58659000000	813	67.8	61.1	60.8	56.8	O04630	O04630	1114	THRRS	Threonine--tRNA ligase, mitochondrial 1
268296566009521	268491191864014	267725353240967	275879211425781	negative regulation of defense response to virus [GO:0050687];response to virus [GO:0009615]	cytoplasm [GO:0005737];cytosol [GO:0005829];eukaryotic translation initiation factor 4F complex [GO:0016281];mRNA cap binding complex [GO:0005845];nucleus [GO:0005634];plastid [GO:0009536]	RNA 7-methylguanosine cap binding [GO:0000340];translation initiation factor activity [GO:0003743]	13	0	30.516	3209700000	83	36.4	26.3	36.4	25.3	O04663	O04663	1116	EIF(ISO)4E	Eukaryotic translation initiation factor isoform 4E
253451957702637	24105094909668	237181644439697	NaN	one-carbon metabolic process [GO:0006730]	chloroplast stroma [GO:0009570];endoplasmic reticulum [GO:0005783]	carbonate dehydratase activity [GO:0004089];hydro-lyase activity [GO:0016836];zinc ion binding [GO:0008270]	9	0	18.158	2334200000	50	15.1	8.8	4.6	0	O04846	O04846	1118	ACA1	Alpha carbonic anhydrase 1, chloroplastic
307393264770508	308514747619629	306553993225098	305962829589844	'de novo' pyrimidine nucleobase biosynthetic process [GO:0006207];'de novo' UMP biosynthetic process [GO:0044205];pyrimidine nucleotide biosynthetic process [GO:0006221]	chloroplast [GO:0009507];cytoplasm [GO:0005737];cytosol [GO:0005829];mitochondrion [GO:0005739]	dihydroorotase activity [GO:0004151];metal ion binding [GO:0046872]	24	0	206.8	27507000000	300	60.5	64.7	60.5	57.8	O04904	O04904	1119	PYR4	Dihydroorotase, mitochondrial
29501443862915	295659084320068	294141941070557	294711933135986	CDP biosynthetic process [GO:0046705];'de novo' pyrimidine nucleobase biosynthetic process [GO:0006207];purine nucleotide metabolic process [GO:0006163];pyrimidine nucleotide biosynthetic process [GO:0006221];pyrimidine ribonucleoside monophosphate metabolic process [GO:0009173];UDP biosynthetic process [GO:0006225]	cytoplasm [GO:0005737];cytosol [GO:0005829];nucleus [GO:0005634];plastid [GO:0009536]	ATP binding [GO:0005524];cytidylate kinase activity [GO:0004127];UMP kinase activity [GO:0033862];uridylate kinase activity [GO:0009041]	25	0	129.22	21983000000	243	66.8	66.8	73.8	71.3	O04905	O04905	1120	UMK3	UMP-CMP kinase 3
292633361816406	292835674285889	292044315338135	290597438812256	response to oxidative stress [GO:0006979]	cytosol [GO:0005829];nucleus [GO:0005634];peroxisome [GO:0005777];plasma membrane [GO:0005886]	glutathione peroxidase activity [GO:0004602];peroxidase activity [GO:0004601]	31	0	229.77	21876000000	265	66.9	66.9	76.3	69.8	O04922	O04922	1121	GPX2	Probable glutathione peroxidase 2
249962368011475	NaN	NaN	247131900787354	regulation of auxin polar transport [GO:2000012]	cytosol [GO:0005829];peroxisome [GO:0005777]	metal ion binding [GO:0046872];protein serine/threonine phosphatase activity [GO:0004722]	10	0	4.7036	418830000	4	20.2	21.8	14.3	18.6	O04951	O04951	1122	PP2A5	Serine/threonine-protein phosphatase PP2A-5 catalytic subunit
3246630859375	325423851013184	323424186706543	323527641296387	fatty acid biosynthetic process [GO:0006633];malonyl-CoA biosynthetic process [GO:2001295]	chloroplast [GO:0009507]	acetyl-CoA carboxylase activity [GO:0003989];ATP binding [GO:0005524];biotin carboxylase activity [GO:0004075];metal ion binding [GO:0046872]	53	0	323.31	128670000000	991	72.4	76	73.7	71.5	O04983	O04983	1123	CAC2	Biotin carboxylase, chloroplastic
336842613220215	337602005004883	335819473266602	334153861999512		anchored component of membrane [GO:0031225];anchored component of plasma membrane [GO:0046658];apoplast [GO:0048046];cytosol [GO:0005829];plasma membrane [GO:0005886];secretory vesicle [GO:0099503]		33	0	323.31	192250000000	811	50.2	50.2	50.2	49.5	O22126	O22126	1125	FLA8	Fasciclin-like arabinogalactan protein 8
32700309753418	327828483581543	326271438598633	32567195892334	cell wall modification [GO:0042545];defense response to Gram-negative bacterium [GO:0050829];pectin catabolic process [GO:0045490];response to bacterium [GO:0009617];response to fungus [GO:0009620]	cell wall [GO:0005618];extracellular region [GO:0005576]	aspartyl esterase activity [GO:0045330];pectinesterase activity [GO:0030599];pectinesterase inhibitor activity [GO:0046910]	26	0	323.31	28370000000	183	53.4	55.2	56.9	53.8	O22149	O22149	1127	PME17	Probable pectinesterase/pectinesterase inhibitor 17
303459358215332	303200168609619	304549350738525	307634296417236		chloroplast [GO:0009507];chloroplast thylakoid [GO:0009534];chloroplast thylakoid lumen [GO:0009543];chloroplast thylakoid membrane [GO:0009535];cytosol [GO:0005829];thylakoid [GO:0009579];thylakoid lumen [GO:0031977]		14	0	323.31	19741000000	209	54.5	54.5	54.5	54.5	O22160	O22160	1128	At2g44920	Thylakoid lumenal 15 kDa protein 1, chloroplastic
320363655090332	32009651184082	321498603820801	321079292297363	regulation of translation [GO:0006417];response to cadmium ion [GO:0046686];viral process [GO:0016032]	cytoplasm [GO:0005737];cytosol [GO:0005829];nucleus [GO:0005634];ribonucleoprotein complex [GO:1990904];vacuole [GO:0005773]	mRNA 3'-UTR binding [GO:0003730];mRNA binding [GO:0003729];poly(A) binding [GO:0008143];poly(U) RNA binding [GO:0008266];RNA binding [GO:0003723]	65	0	323.31	107580000000	939	49.5	50.3	48	54.5	O22173	O22173	1129	PAB4	Polyadenylate-binding protein 4
254348545074463	254020080566406	251252212524414	25488151550293	protein autophosphorylation [GO:0046777]	integral component of membrane [GO:0016021];plasma membrane [GO:0005886];plasmodesma [GO:0009506];vacuole [GO:0005773]	ATP binding [GO:0005524];protein kinase activity [GO:0004672];protein serine/threonine kinase activity [GO:0004674]	5	0.00057176	2.6999	643840000	37	3.4	3.5	4.6	5.6	O22187	O22187	1130	At2g23200	Probable receptor-like protein kinase At2g23200
251323013305664	254498195648193	253298168182373	255298137664795	coumarin biosynthetic process [GO:0009805];flavonoid biosynthetic process [GO:0009813];lignin biosynthetic process [GO:0009809];phenylpropanoid biosynthetic process [GO:0009699]	cytosol [GO:0005829];endoplasmic reticulum [GO:0005783];integral component of membrane [GO:0016021];intracellular membrane-bounded organelle [GO:0043231];membrane [GO:0016020];mitochondrion [GO:0005739];plasma membrane [GO:0005886]	heme binding [GO:0020037];identical protein binding [GO:0042802];iron ion binding [GO:0005506];monooxygenase activity [GO:0004497];oxidoreductase activity, acting on paired donors, with incorporation or reduction of molecular oxygen, NAD(P)H as one donor, and incorporation of one atom of oxygen [GO:0016709];p-coumarate 3-hydroxylase activity [GO:0046409]	7	0	7.6626	1210600000	40	3	3	3	3	O22203	O22203	1131	CYP98A3	Cytochrome P450 98A3
215764408111572	214781799316406	235414409637451	NaN	cell fate determination [GO:0001709];cell-cell signaling [GO:0007267];embryo sac development [GO:0009553];embryo sac egg cell differentiation [GO:0009560];mRNA splicing, via spliceosome [GO:0000398]	nuclear speck [GO:0016607];spliceosomal complex [GO:0005681];U4/U6 x U5 tri-snRNP complex [GO:0046540]	U4 snRNA binding [GO:0030621];U6 snRNA binding [GO:0017070]	12	0	22.902	2376800000	34	2.5	4.5	4.5	0	O22212	O22212	1133	LIS	U4/U6 small nuclear ribonucleoprotein PRP4-like protein
254340267181396	24563720703125	NaN	247492942810059	carbohydrate metabolic process [GO:0005975];glycerol-3-phosphate catabolic process [GO:0046168];glycerol-3-phosphate metabolic process [GO:0006072];NADH oxidation [GO:0006116]	cytosol [GO:0005829];glycerol-3-phosphate dehydrogenase complex [GO:0009331]	glycerol-3-phosphate dehydrogenase [NAD+] activity [GO:0004367];NAD binding [GO:0051287]	9	0	13.17	1428600000	37	3.7	3.7	0	3.7	O22216	O22216	1134	GPDHC1	Glycerol-3-phosphate dehydrogenase [NAD(+)] GPDHC1, cytosolic
327435455322266	327066841125488	32972354888916	328004875183105	cell redox homeostasis [GO:0045454];hydrogen peroxide catabolic process [GO:0042744];positive regulation of catalytic activity [GO:0043085];regulation of chlorophyll biosynthetic process [GO:0010380];regulation of starch biosynthetic process [GO:0010581];removal of superoxide radicals [GO:0019430]	chloroplast [GO:0009507];chloroplast stroma [GO:0009570];cytosol [GO:0005829]	enzyme activator activity [GO:0008047];identical protein binding [GO:0042802];oxidoreductase activity, acting on a sulfur group of donors, disulfide as acceptor [GO:0016671];thioredoxin-disulfide reductase activity [GO:0004791]	33	0	323.31	85369000000	459	48.4	51.2	49.3	47.8	O22229	O22229	1136	NTRC	NADPH-dependent thioredoxin reductase 3
NaN	27318811416626	253997611999512	268337631225586	defense response [GO:0006952];L-phenylalanine biosynthetic process [GO:0009094];response to karrikin [GO:0080167]	chloroplast [GO:0009507];chloroplast stroma [GO:0009570];cytoplasm [GO:0005737]	arogenate dehydratase activity [GO:0047769];prephenate dehydratase activity [GO:0004664]	14	0	160.12	3537800000	39	6.6	6.6	8.5	10.6	O22241	O22241	1137	ADT4	Arogenate dehydratase 4, chloroplastic
319234447479248	320115852355957	319010982513428	318640041351318	cell redox homeostasis [GO:0045454];double fertilization forming a zygote and endosperm [GO:0009567];embryo development ending in seed dormancy [GO:0009793];embryo sac development [GO:0009553];pollen tube development [GO:0048868];response to cadmium ion [GO:0046686];response to endoplasmic reticulum stress [GO:0034976]	cytosol [GO:0005829];endoplasmic reticulum [GO:0005783];plant-type cell wall [GO:0009505];secretory vesicle [GO:0099503];vacuolar membrane [GO:0005774]	protein disulfide isomerase activity [GO:0003756]	57	0	323.31	91540000000	829	85.6	82.3	75.3	84.2	O22263	O22263	1138	PDIL2-1	Protein disulfide-isomerase like 2-1
275414123535156	2814870262146	276020126342773	2823876953125	protein heterotrimerization [GO:0070208];protein import into chloroplast thylakoid membrane [GO:0045038];response to high light intensity [GO:0009644]	chloroplast [GO:0009507];chloroplast envelope [GO:0009941];chloroplast stroma [GO:0009570];chloroplast thylakoid membrane [GO:0009535];cytosol [GO:0005829];protein-containing complex [GO:0032991];signal recognition particle, chloroplast targeting [GO:0080085];signal recognition particle, endoplasmic reticulum targeting [GO:0005786]	disordered domain specific binding [GO:0097718];identical protein binding [GO:0042802];metal ion binding [GO:0046872];protein domain specific binding [GO:0019904];protein-macromolecule adaptor activity [GO:0030674]	12	0	27.03	5237300000	89	13.1	17.4	13.7	25.7	O22265	O22265	1139	CAO	Signal recognition particle 43 kDa protein, chloroplastic
294201927185059	293443298339844	294742336273193	295415420532227	cellulose biosynthetic process [GO:0030244];defense response to bacterium [GO:0042742];GDP-mannose biosynthetic process [GO:0009298];L-ascorbic acid biosynthetic process [GO:0019853];response to ammonium ion [GO:0060359];response to heat [GO:0009408];response to jasmonic acid [GO:0009753];response to ozone [GO:0010193];response to salt stress [GO:0009651]	cytosol [GO:0005829];nucleus [GO:0005634]	GTP binding [GO:0005525];mannose-1-phosphate guanylyltransferase activity [GO:0004475]	34	0	179.85	28808000000	336	40.7	38.5	41.3	42.7	O22287	O22287	1141	CYT1	Mannose-1-phosphate guanylyltransferase 1
260952892303467	257667598724365	257557754516602	262678527832031	mRNA cis splicing, via spliceosome [GO:0045292];regulation of alternative mRNA splicing, via spliceosome [GO:0000381]	interchromatin granule [GO:0035061];nuclear speck [GO:0016607];nucleus [GO:0005634];spliceosomal complex [GO:0005681]	mRNA binding [GO:0003729];RNA binding [GO:0003723]	18	0	45.224	11055000000	77	9.6	5.6	3	3	O22315	O22315	1142	SR34	Serine/arginine-rich-splicing factor SR34
215877437591553	NaN	251967430114746	NaN	DNA mediated transformation [GO:0009294];histone acetylation [GO:0016573];histone H3 deacetylation [GO:0070932];histone H4 deacetylation [GO:0070933];jasmonic acid and ethylene-dependent systemic resistance [GO:0009861];negative regulation of transcription, DNA-templated [GO:0045892];pathogenesis [GO:0009405];positive regulation of stem cell population maintenance [GO:1902459];positive regulation…	histone deacetylase complex [GO:0000118];nucleus [GO:0005634];Sin3-type complex [GO:0070822]	histone deacetylase activity [GO:0004407];NAD-dependent histone deacetylase activity (H3-K14 specific) [GO:0032041]	7	0	35.266	2080800000	41	2.4	0	4.6	3.2	O22446	O22446	1143	HDA19	Histone deacetylase 19
273761692047119	27285774230957	272611408233643	274099750518799	DNA replication [GO:0006260];embryo development ending in seed dormancy [GO:0009793];flower development [GO:0009908];heterochromatin assembly [GO:0031507];heterochromatin organization [GO:0070828];leaf development [GO:0048366];multicellular organism development [GO:0007275];pollen development [GO:0009555];positive regulation of cell cycle [GO:0045787];regulation of flower development [GO:0009909]…	chromatin silencing complex [GO:0005677];Cul4-RING E3 ubiquitin ligase complex [GO:0080008];nucleus [GO:0005634]		16	0	39.428	3901000000	103	19.6	20.3	23.3	27.4	O22467	O22467	1144	MSI1	Histone-binding protein MSI1
276177883148193	27618839263916	278306846618652	278480453491211	chromatin organization [GO:0006325]	Cul4-RING E3 ubiquitin ligase complex [GO:0080008];cytosol [GO:0005829];nucleus [GO:0005634]		14	0	41.851	7632300000	138	14.2	22.2	21	25.1	O22468	O22468	1145	MSI2	WD-40 repeat-containing protein MSI2
27202751159668	281160469055176	280139312744141	283283443450928	anther wall tapetum cell differentiation [GO:0048657];brassinosteroid homeostasis [GO:0010268];brassinosteroid mediated signaling pathway [GO:0009742];detection of brassinosteroid stimulus [GO:0009729];hormone-mediated signaling pathway [GO:0009755];leaf development [GO:0048366];microtubule bundle formation [GO:0001578];negative regulation of cell death [GO:0060548];pollen exine formation [GO:001…	endosome [GO:0005768];endosome membrane [GO:0010008];integral component of membrane [GO:0016021];plasma membrane [GO:0005886]	ATP binding [GO:0005524];identical protein binding [GO:0042802];protein heterodimerization activity [GO:0046982];protein homodimerization activity [GO:0042803];protein kinase activity [GO:0004672];protein serine/threonine kinase activity [GO:0004674];steroid binding [GO:0005496];transmembrane receptor protein tyrosine kinase activity [GO:0004714]	4	0.0018549	2.2324	6457100000	21	1.9	2.5	1.8	1.8	O22476	O22476	1147	BRI1	Protein BRASSINOSTEROID INSENSITIVE 1
259846572875977	261205425262451	260942611694336	261587905883789	chloroplast organization [GO:0009658]	cytosol [GO:0005829]	ATP binding [GO:0005524];protein kinase activity [GO:0004672];protein serine/threonine kinase activity [GO:0004674];protein serine/threonine/tyrosine kinase activity [GO:0004712]	17	0	34.219	3765900000	87	18.5	15.4	13.4	17.8	O22558	O22558	1148	STY8	Serine/threonine-protein kinase STY8
312084484100342	313210391998291	314002952575684	313000755310059	cell differentiation [GO:0030154];chromatin organization [GO:0006325];DNA repair [GO:0006281];flower development [GO:0009908];response to UV-B [GO:0010224]	Cul4-RING E3 ubiquitin ligase complex [GO:0080008];cytoplasm [GO:0005737];cytosol [GO:0005829];mitochondrion [GO:0005739];nucleolus [GO:0005730];nucleus [GO:0005634]	metal ion binding [GO:0046872]	41	0	323.31	57811000000	650	53.1	56.6	59.4	50.1	O22607	O22607	1149	MSI4	WD-40 repeat-containing protein MSI4
279271087646484	279969043731689	282010231018066	281503009796143	photosystem II repair [GO:0010206];protein catabolic process [GO:0030163]	chloroplast [GO:0009507];chloroplast thylakoid [GO:0009534];chloroplast thylakoid membrane [GO:0009535];cytosol [GO:0005829];nucleus [GO:0005634];thylakoid [GO:0009579];thylakoid lumen [GO:0031977]	identical protein binding [GO:0042802];serine-type endopeptidase activity [GO:0004252];serine-type peptidase activity [GO:0008236]	16	0	57.619	4503200000	110	38	42.1	28.9	26.2	O22609	O22609	1150	DEGP1	Protease Do-like 1, chloroplastic
279639453887939	27878532409668	281528167724609	281261291503906	cysteine biosynthetic process from serine [GO:0006535];photosynthesis [GO:0015979];photosynthetic acclimation [GO:0009643];regulation of hydrogen peroxide metabolic process [GO:0010310];regulation of superoxide metabolic process [GO:0090322]	chloroplast [GO:0009507];chloroplast thylakoid lumen [GO:0009543];cytoplasm [GO:0005737];thylakoid lumen [GO:0031977]	cysteine synthase activity [GO:0004124];pyridoxal phosphate binding [GO:0030170]	12	0	45.156	3053400000	90	27.7	28.5	28.5	28.5	O22682	O22682	1151	CS26	S-sulfo-L-cysteine synthase (O-acetyl-L-serine-dependent), chloroplastic
304293212890625	304821224212646	303363914489746	305123920440674	cyanate catabolic process [GO:0009440];response to salt stress [GO:0009651]	cytosol [GO:0005829]	cyanate hydratase activity [GO:0008824];DNA binding [GO:0003677];identical protein binding [GO:0042802]	14	0	282.35	25162000000	204	70.2	67.3	70.2	58.3	O22683	O22683	1152	CYN	Cyanate hydratase
269404449462891	264507331848145	267169876098633	263758716583252		chloroplast envelope [GO:0009941];plasma membrane [GO:0005886]	oxidoreductase activity [GO:0016491]	18	0	28.035	1417100000	34	25.5	27.2	29.3	26.1	O22707	O22707	1153	At1g60690	Probable aldo-keto reductase 3
NaN	243798084259033	NaN	244141578674316		mitochondrion [GO:0005739]		11	0	9.2641	1072300000	22	0	3.5	0	1.8	O22714	O22714	1154	At1g60770	Pentatricopeptide repeat-containing protein At1g60770
254024639129639	269507141113281	260570335388184	254085655212402	intracellular protein transport [GO:0006886];vesicle-mediated transport [GO:0016192]	clathrin adaptor complex [GO:0030131];clathrin-coated vesicle membrane [GO:0030665];cytoplasmic vesicle [GO:0031410];cytosol [GO:0005829];early endosome membrane [GO:0031901];Golgi apparatus [GO:0005794];intracellular membrane-bounded organelle [GO:0043231];nucleus [GO:0005634]		28	0	186.95	11776000000	174	3.3	1.4	3.3	3.3	O22715;Q9SAC9	O22715	1155	AP1M2	AP-1 complex subunit mu-2
264203720092773	259806976318359	262886447906494	258670291900635	auxin biosynthetic process [GO:0009851];tryptophan biosynthetic process [GO:0000162]	chloroplast [GO:0009507];cytoplasm [GO:0005737];cytosol [GO:0005829]	indole-3-glycerol-phosphate lyase activity [GO:0033984];tryptophan synthase activity [GO:0004834]	8	0	19.509	1629300000	31	18.2	20.7	36	30.2	O22765	O22765	1157	TRPA1	Tryptophan synthase alpha chain
26871265411377	267151565551758	263138904571533	260394649505615	mitochondrial electron transport, NADH to ubiquinone [GO:0006120];respiratory electron transport chain [GO:0022904];response to oxidative stress [GO:0006979]	cytosol [GO:0005829];mitochondrial respiratory chain complex I [GO:0005747];mitochondrion [GO:0005739]	2 iron, 2 sulfur cluster binding [GO:0051537];NADH dehydrogenase (ubiquinone) activity [GO:0008137];zinc ion binding [GO:0008270]	9	0	34.92	3344800000	94	12.9	15.7	16.5	11.8	O22769	O22769	1159	At4g02580	NADH dehydrogenase [ubiquinone] flavoprotein 2, mitochondrial
252676010131836	2512451171875	253205852508545	264754810333252	photosystem II repair [GO:0010206]	chloroplast [GO:0009507];chloroplast envelope [GO:0009941];chloroplast stroma [GO:0009570];chloroplast thylakoid [GO:0009534];chloroplast thylakoid lumen [GO:0009543];chloroplast thylakoid membrane [GO:0009535];cytosol [GO:0005829];thylakoid [GO:0009579];thylakoid lumen [GO:0031977]		3	0	17.897	763250000	27	19.9	19.9	11.1	5.6	O22773	O22773	1160	At4g02530	Thylakoid lumenal 16.5 kDa protein, chloroplastic
249836807250977	248729572296143	247073040008545	251508541107178	plasmodesmata-mediated intercellular transport [GO:0010497];transport of virus in multicellular host [GO:0046739]	integral component of membrane [GO:0016021];plasma membrane [GO:0005886];plasmodesma [GO:0009506]		2	0	15.287	309390000	5	8.2	8.2	8.2	8.2	O22784	O22784	1161	PDLP3	Plasmodesmata-located protein 3
288961982727051	285895652770996	286751918792725	287817859649658	defense response to bacterium [GO:0042742];DNA repair [GO:0006281];generation of catalytic spliceosome for first transesterification step [GO:0000349];innate immune response [GO:0045087];protein K63-linked ubiquitination [GO:0070534]	catalytic step 2 spliceosome [GO:0071013];cell wall [GO:0005618];Cul4-RING E3 ubiquitin ligase complex [GO:0080008];endoplasmic reticulum [GO:0005783];nucleus [GO:0005634];Prp19 complex [GO:0000974];U2-type catalytic step 1 spliceosome [GO:0071006]	ubiquitin protein ligase activity [GO:0061630];ubiquitin-protein transferase activity [GO:0004842]	30	0	323.31	21171000000	292	38.7	26.9	26.7	26.1	O22785	O22785	1162	PRP19B	Pre-mRNA-processing factor 19 homolog 2
247469902038574	261151351928711	260266914367676	259674339294434	regulation of RNA metabolic process [GO:0051252]	endoplasmic reticulum [GO:0005783];nucleus [GO:0005634];ribonucleoprotein complex [GO:1990904]	mRNA binding [GO:0003729];RNA binding [GO:0003723]	11	0	68.336	3775900000	67	7.2	8.9	8.7	8.7	O22791	O22791	1163	At2g33410	Putative RNA-binding protein
262862319946289	265024566650391	267654705047607	265947704315186	cytidine to uridine editing [GO:0016554];endonucleolytic cleavage of tetracistronic rRNA transcript (SSU-rRNA, LSU-rRNA, 4.5S-rRNA, 5S-rRNA) [GO:0002103];mitochondrial mRNA modification [GO:0080156];mRNA processing [GO:0006397];plastid organization [GO:0009657]	chloroplast [GO:0009507];endoplasmic reticulum [GO:0005783];mitochondrion [GO:0005739]	protein dimerization activity [GO:0046983];protein homodimerization activity [GO:0042803]	4	0	13.939	533080000	10	15.5	15.5	15.5	15.5	O22793	O22793	1164	MORF2	Multiple organellar RNA editing factor 2, chloroplastic
256866436004639	257306308746338	256149005889893	260692977905273	ceramide transport [GO:0035627];intermembrane lipid transfer [GO:0120009]	cytosol [GO:0005829];membrane [GO:0016020];plasma membrane [GO:0005886]	ceramide 1-phosphate binding [GO:1902387];ceramide 1-phosphate transfer activity [GO:1902388];lipid binding [GO:0008289]	17	0	76.951	5656800000	93	26.2	20.8	19.8	22.3	O22797	O22797	1165	GLTP1	Glycolipid transfer protein 1
290139579772949	290538520812988	294190464019775	294212970733643	cellular response to hypoxia [GO:0071456];response to abscisic acid [GO:0009737];response to cadmium ion [GO:0046686];response to heat [GO:0009408];response to water deprivation [GO:0009414]		oxidoreductase activity [GO:0016491];oxidoreductase activity, acting on the CH-OH group of donors, NAD or NADP as acceptor [GO:0016616]	18	0	81.043	13139000000	219	18.1	24	24.9	21.2	O22809	O22809	1166	CRL1	NAD(P)-binding Rossmann-fold superfamily protein
264094409942627	260016136169434	269120502471924	266244983673096			oxidoreductase activity [GO:0016491];oxidoreductase activity, acting on the CH-OH group of donors, NAD or NADP as acceptor [GO:0016616]	16	0	14.465	1741800000	58	34	34.6	30.8	24.9	O22810	O22810	1167	CRL2	At2g33600
298916435241699	29963752746582	300532321929932	300057106018066	benzoate metabolic process [GO:0018874];para-aminobenzoic acid metabolic process [GO:0046482];positive regulation of seed germination [GO:0010030];salicylic acid metabolic process [GO:0009696]	cytosol [GO:0005829];intracellular membrane-bounded organelle [GO:0043231]	benzoic acid glucosyltransferase activity [GO:0052641];nicotinate-O-glucosyltransferase activity [GO:0090704];quercetin 3-O-glucosyltransferase activity [GO:0080043];quercetin 7-O-glucosyltransferase activity [GO:0080044];salicylic acid glucosyltransferase (ester-forming) activity [GO:0052639];salicylic acid glucosyltransferase (glucoside-forming) activity [GO:0052640];UDP-glucose:4-aminobenzoate…	24	0	323.31	18988000000	278	34.3	34.1	36.5	35.2	O22822	O22822	1169	UGT74F2	UDP-glycosyltransferase 74F2
26213508605957	264653339385986	261735992431641	283788585662842	maturation of SSU-rRNA [GO:0030490];mRNA splicing, via spliceosome [GO:0000398]	nucleolus [GO:0005730];P-body [GO:0000932];small nucleolar ribonucleoprotein complex [GO:0005732];spliceosomal complex [GO:0005681];U4/U6 x U5 tri-snRNP complex [GO:0046540];U6 snRNP [GO:0005688]	RNA binding [GO:0003723]	6	0	10.398	2708700000	42	34.1	22	25.3	13.2	O22823	O22823	1170	LSM6B	Sm-like protein LSM36B
282943458557129	284308166503906	282206192016602	283347091674805	Mo-molybdopterin cofactor biosynthetic process [GO:0006777]	cytosol [GO:0005829];molybdopterin synthase complex [GO:0019008]	molybdopterin synthase activity [GO:0030366]	13	0	50.886	7966900000	151	41.9	39.9	61.1	42.4	O22827	O22827	1172	MOCS2	Molybdopterin synthase catalytic subunit
295940952301025	296959590911865	298721466064453	296962070465088	defense response [GO:0006952];fatty acid biosynthetic process [GO:0006633];fatty acid metabolic process [GO:0006631]	chloroplast stroma [GO:0009570]	acyl-[acyl-carrier-protein] desaturase activity [GO:0045300];metal ion binding [GO:0046872];stearoyl-[acp] desaturase activity [GO:0102786];stearoyl-CoA 9-desaturase activity [GO:0004768]	25	0	121.5	14768000000	189	44.9	49.4	48.4	39.2	O22832;Q84VY3	O22832	1173	FAB2	Stearoyl-[acyl-carrier-protein] 9-desaturase 7, chloroplastic
279194583892822	276739120483398	282062034606934	282352123260498	cell wall macromolecule catabolic process [GO:0016998];chitin catabolic process [GO:0006032];defense response [GO:0006952];polysaccharide catabolic process [GO:0000272]	apoplast [GO:0048046];secretory vesicle [GO:0099503]	chitin binding [GO:0008061];chitinase activity [GO:0004568]	7	0	102.35	2014400000	40	31.1	25.4	36	36	O22841	O22841	1174	At2g43620	Endochitinase At2g43620
209604911804199	215052337646484	215358295440674	246350021362305	cell wall macromolecule catabolic process [GO:0016998];chitin catabolic process [GO:0006032];defense response [GO:0006952];polysaccharide catabolic process [GO:0000272]	plasma membrane [GO:0005886]	chitin binding [GO:0008061];chitinase activity [GO:0004568]	16	0	67.746	5798200000	106	15.3	9.6	15.3	15.3	O22842	O22842	1175	At2g43610	Endochitinase At2g43610
221988048553467	NaN	222706203460693	224706783294678	ribonucleoprotein complex assembly [GO:0022618];translation [GO:0006412]	cytosol [GO:0005829];cytosolic large ribosomal subunit [GO:0022625];cytosolic ribosome [GO:0022626]	structural constituent of ribosome [GO:0003735]	13	0	62.913	14076000000	85	10.1	0	10.1	10.1	O22860	O22860	1176	RPL38A	60S ribosomal protein L38
272736434936523	272136383056641	275544261932373	274034061431885	plant-type cell wall organization [GO:0009664];syncytium formation [GO:0006949]	cell wall [GO:0005618];extracellular region [GO:0005576];membrane [GO:0016020]		3	0	16.361	2297400000	26	16.2	12.6	9.1	16.2	O22874	O22874	1179	EXPA8	Expansin-A8
333707504272461	332330665588379	33247142791748	329794921875	chlorophyll biosynthetic process [GO:0015995];protoporphyrinogen IX biosynthetic process [GO:0006782]	chloroplast [GO:0009507];chloroplast envelope [GO:0009941];chloroplast stroma [GO:0009570];Golgi apparatus [GO:0005794]	uroporphyrinogen decarboxylase activity [GO:0004853]	34	0	323.31	107710000000	658	69	68.5	68.5	67	O22886	O22886	1180	HEME2	Uroporphyrinogen decarboxylase 2, chloroplastic
NaN	244969825744629	243465156555176	249686431884766	mRNA processing [GO:0006397];RNA splicing [GO:0008380]	chloroplast envelope [GO:0009941];spliceosomal complex [GO:0005681]	ATP binding [GO:0005524];RNA binding [GO:0003723];RNA helicase activity [GO:0003724]	29	0	21.472	753420000	20	7.8	10	10.8	12.1	O22899	O22899	1182	At2g47250	Probable pre-mRNA-splicing factor ATP-dependent RNA helicase DEAH3
265784511566162	260377082824707	266559467315674	267380218505859		nucleus [GO:0005634]	ATP binding [GO:0005524];RNA binding [GO:0003723];RNA helicase activity [GO:0003724]	13	0	12.002	2528800000	59	10.1	1.3	5.4	11.1	O22907	O22907	1183	RH24	DEAD-box ATP-dependent RNA helicase 24
248963832855225	252023963928223	248844604492188	250864677429199	negative regulation of reductive pentose-phosphate cycle [GO:0080153];reductive pentose-phosphate cycle [GO:0019253];response to sucrose [GO:0009744]	chloroplast [GO:0009507];chloroplast envelope [GO:0009941];chloroplast stroma [GO:0009570];cytosol [GO:0005829];protein-containing complex [GO:0032991]	copper ion binding [GO:0005507];nickel cation binding [GO:0016151]	2	0	19.487	688430000	13	31.5	31.5	31.5	7.3	O22914	O22914	1184	CP12-1	Calvin cycle protein CP12-1, chloroplastic
272738208770752	273368797302246	270779590606689	273483238220215	cis assembly of pre-catalytic spliceosome [GO:0000354];mRNA splicing, via spliceosome [GO:0000398]	Cajal body [GO:0015030];cytoplasm [GO:0005737];nucleoplasm [GO:0005654];spliceosomal complex [GO:0005681];U2 snRNP [GO:0005686]	RNA binding [GO:0003723]	6	0	16.743	3012300000	45	17.7	16.4	22	12.1	O22922	O22922	1185	U2B''	U2 small nuclear ribonucleoprotein B''
286455059051514	288650531768799	289104785919189	29091869354248	peptide catabolic process [GO:0043171];proteolysis involved in cellular protein catabolic process [GO:0051603]	cytosol [GO:0005829];mitochondrion [GO:0005739];peroxisome [GO:0005777]	metal ion binding [GO:0046872];metalloendopeptidase activity [GO:0004222]	57	0	286.2	22696000000	413	24.3	20.5	18.6	17.7	O22941;A0A1I9LPB3	O22941	1187	PXM16	Insulin-degrading enzyme-like 1, peroxisomal
298315753936768	300366916656494	298350429534912	298752269744873	regulation of programmed cell death [GO:0043067]	cytosol [GO:0005829];endoplasmic reticulum [GO:0005783];nucleus [GO:0005634];plasmodesma [GO:0009506]	mRNA binding [GO:0003729];RNA binding [GO:0003723]	38	0	314.62	18175000000	363	47.7	43	40.1	42.1	O22957	O22957	1189	At2g34040	Apoptosis inhibitory protein 5 (API5)
246722793579102	252684230804443	247625846862793	252337779998779		Golgi apparatus [GO:0005794];integral component of membrane [GO:0016021]	O-acetyltransferase activity [GO:0016413]	8	0	50.464	1880800000	49	6.2	6.5	4.2	12.2	O22960	O22960	1191	TBL37	Protein trichome birefringence-like 37
248034610748291	24851146697998	252063522338867	249163856506348	rRNA processing [GO:0006364]	cytosol [GO:0005829];endoplasmic reticulum [GO:0005783];nucleus [GO:0005634]	nucleic acid binding [GO:0003676]	11	0	10.815	701650000	5	35.4	23.1	27.7	27.7	O22969	O22969	1192	At2g34160	Uncharacterized protein At2g34160
27870325088501	279351711273193	275793151855469	274600620269775		nucleus [GO:0005634]		9	0	33.53	5490400000	41	12.1	12.1	12.1	12.1	O22978	O22978	1194	T19F6.7	T19F6.7 protein
296770076751709	291506652832031	290636825561523	293383693695068	defense response [GO:0006952]	anchored component of membrane [GO:0031225];anchored component of plasma membrane [GO:0046658];mitochondrion [GO:0005739];plasma membrane [GO:0005886];plasmodesma [GO:0009506]	chitin binding [GO:0008061]	12	0	67.24	10675000000	106	30	24.9	22.3	22.3	O23006	O23006	1195	LYM2	LysM domain-containing GPI-anchored protein 2
297295227050781	298304882049561	2986794090271	298096199035645	oxidation-reduction process [GO:0055114];potassium ion transport [GO:0006813];regulation of ion transmembrane transport [GO:0034765]	extracellular region [GO:0005576];plasma membrane [GO:0005886];plasmodesma [GO:0009506]	aldo-keto reductase (NADP) activity [GO:0004033];voltage-gated ion channel activity [GO:0005244]	25	0	88.432	19079000000	225	47	46.6	56.4	52.7	O23016	O23016	1196	KAB1	Probable voltage-gated potassium channel subunit beta
296156330108643	29604700088501	295950736999512	295136737823486	protein modification by small protein conjugation [GO:0032446];protein ufmylation [GO:0071569]	cytoplasm [GO:0005737];cytosol [GO:0005829]	ATP binding [GO:0005524];metal ion binding [GO:0046872];UFM1 activating enzyme activity [GO:0071566]	24	0	323.31	19978000000	294	50.3	45.7	48.5	50.8	O23034	O23034	1197	At1g05350	Ubiquitin-like modifier-activating enzyme 5
257757530212402	25627758026123	255156288146973	254299793243408	hydrogen peroxide catabolic process [GO:0042744];hyperosmotic salinity response [GO:0042538];response to cold [GO:0009409];response to desiccation [GO:0009269];response to oxidative stress [GO:0006979]	endoplasmic reticulum [GO:0005783];extracellular region [GO:0005576];plant-type cell wall [GO:0009505];plasmodesma [GO:0009506]	heme binding [GO:0020037];metal ion binding [GO:0046872];peroxidase activity [GO:0004601]	13	0	240.17	6079000000	81	14.1	14.7	17.5	10.7	O23044;Q43872;P0DI10	O23044	1198	PER3	Peroxidase 3
288653774261475	286518135070801	28755350112915	287940502166748	embryo development ending in seed dormancy [GO:0009793];translation [GO:0006412]	chloroplast [GO:0009507];chloroplast envelope [GO:0009941];chloroplast stroma [GO:0009570];extracellular region [GO:0005576];ribosome [GO:0005840]	rRNA binding [GO:0019843];structural constituent of ribosome [GO:0003735]	13	0	53.646	4614400000	119	35.9	35.9	33.6	32.3	O23049	O23049	1199	RPL6	50S ribosomal protein L6, chloroplastic
251304168701172	251217479705811	2497434425354	NaN	regulation of cell cycle [GO:0051726]	nucleus [GO:0005634]		7	0	10.28	877490000	12	6.4	10.6	9.5	0	O23126	O23126	1200	At1g22970	At1g22970/F19G10_8
282545776367188	283120727539063	281463241577148	282424545288086	gibberellic acid homeostasis [GO:0010336];mitochondrial electron transport, cytochrome c to oxygen [GO:0006123];mitochondrial electron transport, ubiquinol to cytochrome c [GO:0006122]	cytosol [GO:0005829];mitochondrial intermembrane space [GO:0005758];mitochondrion [GO:0005739];nucleus [GO:0005634];respirasome [GO:0070469];vacuolar membrane [GO:0005774]	copper ion binding [GO:0005507];electron transfer activity [GO:0009055];heme binding [GO:0020037]	8	0	23.85	3917300000	79	52.6	50	50	52.6	O23138	O23138	1201	CYTC-1	Cytochrome c-1
244036655426025	249960632324219	246983222961426	262004890441895	endocytosis [GO:0006897];intracellular protein transport [GO:0006886];vesicle-mediated transport [GO:0016192]	clathrin adaptor complex [GO:0030131];clathrin-coated pit [GO:0005905];cytoplasmic vesicle [GO:0031410];Golgi apparatus [GO:0005794];intracellular membrane-bounded organelle [GO:0043231]	lipid binding [GO:0008289]	25	0	52.875	7025800000	71	4.3	6.2	2.3	11.2	O23140	O23140	1202	AP2M	AP-2 complex subunit mu
287182960510254	289742946624756	290608768463135	290418434143066	regulation of proton transport [GO:0010155]	cytosol [GO:0005829];endoplasmic reticulum [GO:0005783];endoplasmic reticulum membrane [GO:0005789];integral component of membrane [GO:0016021];plasma membrane [GO:0005886];plasmodesma [GO:0009506]	mRNA binding [GO:0003729]	41	0	100.32	15472000000	289	29.2	30.9	25.8	24.3	O23144	O23144	1204	PPI1	Proton pump-interactor 1
255937461853027	272199268341064	268283252716064	260907936096191		cytosol [GO:0005829];vacuolar membrane [GO:0005774]		17	0	116.69	3472500000	91	1.2	1.2	1.2	1.2	O23167	O23167	1205	C7A10.170	At4g37190
255484561920166	260448112487793	252190780639648	259668617248535	defense response to fungus, incompatible interaction [GO:0009817];jasmonic acid metabolic process [GO:0009694];salicylic acid metabolic process [GO:0009696];systemic acquired resistance [GO:0009627]		hydrolase activity [GO:0016787];hydrolase activity, acting on ester bonds [GO:0016788];methyl indole-3-acetate esterase activity [GO:0080030];methyl jasmonate esterase activity [GO:0080032];methyl salicylate esterase activity [GO:0080031]	8	0	29.432	1095300000	35	19.9	19.9	29.7	20.3	O23171	O23171	1206	MES9	Methylesterase 9
284834690093994	281421432495117	280412940979004	NaN	defense response [GO:0006952];lateral root formation [GO:0010311];lipid catabolic process [GO:0016042]	cytoplasm [GO:0005737]	acylglycerol lipase activity [GO:0047372];phospholipase activity [GO:0004620]	24	0	166.03	7414100000	132	2.9	8	8	0	O23179	O23179	1207	PLP1	Patatin-like protein 1
248690071105957	241548366546631	247177982330322	NaN	oxidation-reduction process [GO:0055114]	plasma membrane [GO:0005886]	FMN binding [GO:0010181];NAD(P)H dehydrogenase (quinone) activity [GO:0003955]	5	0	25.462	1753500000	38	17.9	5.9	13.9	5.9	O23207	O23207	1209	At4g36750	Probable NAD(P)H dehydrogenase (quinone) FQR1-like 2
NaN	251110000610352	NaN	247873592376709	defense response to bacterium [GO:0042742];mRNA splicing, via spliceosome [GO:0000398]	commitment complex [GO:0000243];nuclear speck [GO:0016607];nucleus [GO:0005634];U2AF [GO:0089701];U2-type prespliceosome [GO:0071004]	poly-pyrimidine tract binding [GO:0008187];pre-mRNA 3'-splice site binding [GO:0030628]	10	0	59.436	1836600000	41	0	3	0	1.7	O23212	O23212	1210	U2AF65A	Splicing factor U2af large subunit A
181296348571777	NaN	182215690612793	NaN	hydrogen peroxide catabolic process [GO:0042744];response to oxidative stress [GO:0006979]	cell wall [GO:0005618];extracellular region [GO:0005576]	heme binding [GO:0020037];metal ion binding [GO:0046872];peroxidase activity [GO:0004601]	12	0	59.351	2056900000	47	4.5	0	4.5	0	O23237;Q9SLH7	O23237	1211	PER49	Peroxidase 49
290802993774414	292363986968994	290702247619629	289056396484375	nitrogen compound metabolic process [GO:0006807];photorespiration [GO:0009853]	mitochondrion [GO:0005739];plasma membrane [GO:0005886]	(R)-2-hydroxyglutarate dehydrogenase activity [GO:0051990];2-hydroxyglutarate dehydrogenase activity [GO:0047545];FAD binding [GO:0071949]	21	0	73.937	7859500000	165	27.4	30.9	37	24.9	O23240	O23240	1212	D2HGDH	D-2-hydroxyglutarate dehydrogenase, mitochondrial
258408622741699	257489624023438	260488681793213	257874336242676	response to virus [GO:0009615]	cytoplasm [GO:0005737];cytoplasmic stress granule [GO:0010494];cytosol [GO:0005829];eukaryotic translation initiation factor 4F complex [GO:0016281];mRNA cap binding complex [GO:0005845];nucleolus [GO:0005730];nucleus [GO:0005634];P-body [GO:0000932]	RNA 7-methylguanosine cap binding [GO:0000340];translation initiation factor activity [GO:0003743]	7	0	10.855	2017400000	43	8.1	18.7	13.2	17.9	O23252	O23252	1213	EIF4E1	Eukaryotic translation initiation factor 4E-1
329844436645508	328551177978516	329788131713867	329668159484863	cellular response to tetrahydrofolate [GO:1904482];circadian rhythm [GO:0007623];folic acid metabolic process [GO:0046655];glycine biosynthetic process from serine [GO:0019264];glycine metabolic process [GO:0006544];L-serine catabolic process [GO:0006565];one-carbon metabolic process [GO:0006730];response to cadmium ion [GO:0046686];tetrahydrofolate interconversion [GO:0035999];tetrahydrofolate m…	cytosol [GO:0005829];plasma membrane [GO:0005886];plasmodesma [GO:0009506]	amino acid binding [GO:0016597];cobalt ion binding [GO:0050897];glycine hydroxymethyltransferase activity [GO:0004372];pyridoxal phosphate binding [GO:0030170];serine binding [GO:0070905];zinc ion binding [GO:0008270]	68	0	323.31	459840000000	1350	79.2	85.8	85.6	72.2	O23254	O23254	1214	SHM4	Serine hydroxymethyltransferase 4
346008949279785	345069313049316	346217842102051	346060371398926	DNA methylation-dependent heterochromatin assembly [GO:0006346];embryo development ending in seed dormancy [GO:0009793];one-carbon metabolic process [GO:0006730];posttranscriptional gene silencing [GO:0016441];S-adenosylmethionine cycle [GO:0033353]	cytosol [GO:0005829];plasma membrane [GO:0005886];plasmodesma [GO:0009506];vacuolar membrane [GO:0005774];vacuole [GO:0005773]	adenosylhomocysteinase activity [GO:0004013];copper ion binding [GO:0005507]	71	0	323.31	727950000000	2264	76.7	77.3	76.7	82.1	O23255	O23255	1215	SAHH1	Adenosylhomocysteinase 1
317796821594238	317862415313721	317569637298584	317618465423584	cellular response to selenium ion [GO:0071291];response to cadmium ion [GO:0046686];response to hydrogen peroxide [GO:0042542];sulfate assimilation [GO:0000103]	cytosol [GO:0005829];plasmodesma [GO:0009506]	selenium binding [GO:0008430]	47	0	323.31	72276000000	642	71.4	82.2	76.9	76.9	O23264	O23264	1216	SBP1	Selenium-binding protein 1
244633865356445	248441696166992	249402885437012	248569030761719	defense response [GO:0006952]	cytosol [GO:0005829]		19	0	68.416	6366800000	81	24.5	24.5	24.5	24.5	O23267	O23267	1217	dl3070w	AT4g14060/dl3070w
239788455963135	NaN	201855583190918	244836387634277	translation [GO:0006412]	cytosol [GO:0005829];cytosolic large ribosomal subunit [GO:0022625]	structural constituent of ribosome [GO:0003735]	20	0	74.046	46504000000	120	38.1	0	20	28.6	O23290	O23290	1218	RPL36AA	60S ribosomal protein L36a
25970157623291	256241073608398	25669849395752	260439567565918	fatty acid beta-oxidation [GO:0006635];fatty acid catabolic process [GO:0009062];indolebutyric acid metabolic process [GO:0080024];response to indolebutyric acid [GO:0080026];root hair elongation [GO:0048767]	peroxisome [GO:0005777]	dodecenoyl-CoA delta-isomerase activity [GO:0004165];enoyl-CoA hydratase activity [GO:0004300]	6	0	4.419	789150000	23	14.2	26.2	7.9	14.6	O23299	O23299	1219	ECI2	Enoyl-CoA delta isomerase 2, peroxisomal
27640100479126	285579719543457	27948543548584	275644187927246	positive regulation of transcription, DNA-templated [GO:0045893]	cytosol [GO:0005829];nucleus [GO:0005634]	DNA-binding transcription factor activity [GO:0003700];protein heterodimerization activity [GO:0046982];sequence-specific DNA binding [GO:0043565]	7	0	11.64	2944300000	46	25.5	28.6	28.6	28.6	O23310	O23310	1221	NFYB3	Nuclear transcription factor Y subunit B-3
259462356567383	260173110961914	255075168609619	255740394592285	carotenoid biosynthetic process [GO:0016117];oxidation-reduction process [GO:0055114]	chloroplast [GO:0009507];chloroplast envelope [GO:0009941];chloroplast membrane [GO:0031969];chloroplast stroma [GO:0009570];cytosol [GO:0005829]	heme binding [GO:0020037];iron ion binding [GO:0005506];monooxygenase activity [GO:0004497];oxidoreductase activity, acting on paired donors, with incorporation or reduction of molecular oxygen [GO:0016705]	7	0	6.6711	893250000	12	6.9	9	11	9	O23365	O23365	1223	CYP97B3	Cytochrome P450 97B3, chloroplastic
NaN	298680438995361	298560695648193	229856700897217			transferase activity, transferring acyl groups other than amino-acyl groups [GO:0016747]	41	0	323.31	67722000000	353	0	2.7	2.7	5.4	O23392	O23392	1224	dl3740c	HSR201-like protein
263999881744385	265144863128662	263946018218994	265063514709473		intracellular membrane-bounded organelle [GO:0043231]	cinnamate beta-D-glucosyltransferase activity [GO:0050412];quercetin 3-O-glucosyltransferase activity [GO:0080043];quercetin 7-O-glucosyltransferase activity [GO:0080044];sinapate 1-glucosyltransferase activity [GO:0050284];UDP-glycosyltransferase activity [GO:0008194]	9	0	10.855	2141500000	60	11.7	11.5	9.4	7.5	O23401	O23401	1226	UGT84A3	UDP-glycosyltransferase 84A3
234352989196777	233857440948486	236039943695068	230205574035645		intracellular membrane-bounded organelle [GO:0043231]	cinnamate beta-D-glucosyltransferase activity [GO:0050412];quercetin 3-O-glucosyltransferase activity [GO:0080043];quercetin 7-O-glucosyltransferase activity [GO:0080044];sinapate 1-glucosyltransferase activity [GO:0050284];UDP-glycosyltransferase activity [GO:0008194]	11	0	57.879	2973000000	69	3.6	1.7	3.6	6.9	O23402	O23402	1227	UGT84A4	UDP-glycosyltransferase 84A4
271119747161865	273908367156982	273503494262695	266233825683594	photosystem I assembly [GO:0048564]	chloroplast [GO:0009507];chloroplast stroma [GO:0009570];chloroplast thylakoid lumen [GO:0009543];chloroplast thylakoid membrane [GO:0009535];extrinsic component of membrane [GO:0019898];photosystem II oxygen evolving complex [GO:0009654];thylakoid [GO:0009579];thylakoid lumen [GO:0031977]	calcium ion binding [GO:0005509]	17	0	89.298	9480200000	115	16	19.2	16	20.2	O23403	O23403	1228	PPD1	PsbP domain-containing protein 1, chloroplastic
358439674377441	357480278015137	35633415222168	358129196166992	photosynthesis [GO:0015979];pyruvate metabolic process [GO:0006090]	chloroplast [GO:0009507];chloroplast stroma [GO:0009570];cytosol [GO:0005829];nucleus [GO:0005634]	ATP binding [GO:0005524];kinase activity [GO:0016301];metal ion binding [GO:0046872];pyruvate, phosphate dikinase activity [GO:0050242]	114	0	323.31	439150000000	1763	82.8	83	82.8	82.9	O23404	O23404	1229	PPDK	Pyruvate, phosphate dikinase 1, chloroplastic
283692798614502	281358947753906	273331298828125	27199104309082	response to toxic substance [GO:0009636]	intracellular membrane-bounded organelle [GO:0043231]	quercetin 3-O-glucosyltransferase activity [GO:0080043];quercetin 7-O-glucosyltransferase activity [GO:0080044];UDP-glycosyltransferase activity [GO:0008194]	22	0	170.24	15780000000	165	19.6	14.1	11.2	17.9	O23406	O23406	1230	UGT75D1	UDP-glycosyltransferase 75D1
NaN	228231239318848	214457664489746	212757148742676	galactose metabolic process [GO:0006012]	cytosol [GO:0005829];integral component of membrane [GO:0016021];plasmodesma [GO:0009506]	ATP binding [GO:0005524];galactose binding [GO:0005534];L-arabinokinase activity [GO:0009702]	40	0	235.05	9647900000	174	0	1	2.6	2.7	O23461	O23461	1231	ARA1	L-arabinokinase
254930171966553	259791069030762	26180046081543	251674480438232	chlorophyll a catabolic process [GO:0033310];demethylation [GO:0070988];jasmonic acid metabolic process [GO:0009694];leaf senescence [GO:0010150];salicylic acid metabolic process [GO:0009696]	cytosol [GO:0005829]	carboxylic ester hydrolase activity [GO:0052689];hydrolase activity [GO:0016787];hydrolase activity, acting on ester bonds [GO:0016788];methyl indole-3-acetate esterase activity [GO:0080030];methyl jasmonate esterase activity [GO:0080032];methyl salicylate esterase activity [GO:0080031];pheophoridase activity [GO:0035560];protein homodimerization activity [GO:0042803]	6	0	5.2085	483290000	7	13	14.5	9.9	12.6	O23512	O23512	1233	PPD	Probable pheophorbidase
NaN	225001850128174	226905746459961	NaN	sexual reproduction [GO:0019953]	extracellular region [GO:0005576]		3	0	5.3123	508760000	12	0	4	4	0	O23547	O23547	1235	EXLB1	Expansin-like B1
313113803863525	302125720977783	301556911468506	29582799911499	maltose biosynthetic process [GO:0000024];response to cold [GO:0009409];starch catabolic process [GO:0005983]	chloroplast stroma [GO:0009570];cytosol [GO:0005829]	amylopectin maltohydrolase activity [GO:0102229];beta-amylase activity [GO:0016161]	51	0	323.31	43883000000	421	61.1	49.6	59.9	54	O23553	O23553	1236	BAM3	Beta-amylase 3, chloroplastic
285518989562988	28580286026001	288693256378174	288963146209717	carbohydrate metabolic process [GO:0005975];carboxylic acid metabolic process [GO:0019752];response to abscisic acid [GO:0009737]	cytosol [GO:0005829];plasma membrane [GO:0005886]	L-lactate dehydrogenase activity [GO:0004459]	17	0	61.23	9531800000	177	37.7	36.3	24.4	21	O23569	O23569	1237	dl4665w	L-lactate dehydrogenase
274830074310303	29357120513916	288944931030273	289734745025635		chloroplast thylakoid lumen [GO:0009543];mitochondrion [GO:0005739];thylakoid [GO:0009579];thylakoid lumen [GO:0031977]	endopeptidase activity [GO:0004175];serine-type peptidase activity [GO:0008236]	17	0	81.731	6580600000	99	25.8	26.2	21.7	14.4	O23614	O23614	1239	CTPA2	Carboxyl-terminal-processing peptidase 2, chloroplastic
NaN	NaN	293192405700684	292590770721436	dephosphorylation [GO:0016311]	cytoplasm [GO:0005737];cytosol [GO:0005829]	transferase activity, transferring glycosyl groups [GO:0016757]	31	0	227.71	7209200000	126	0	0	1.7	1.7	O23617	O23617	1240	TPS5	Alpha,alpha-trehalose-phosphate synthase [UDP-forming] 5
330800628662109	331000213623047	331657409667969	331252632141113	diadenosine tetraphosphate biosynthetic process [GO:0015966];glycyl-tRNA aminoacylation [GO:0006426];mitochondrial glycyl-tRNA aminoacylation [GO:0070150];response to cadmium ion [GO:0046686]	chloroplast [GO:0009507];cytoplasm [GO:0005737];cytosol [GO:0005829];endosome [GO:0005768];Golgi apparatus [GO:0005794];mitochondrion [GO:0005739];nucleus [GO:0005634];trans-Golgi network [GO:0005802]	ATP binding [GO:0005524];glycine-tRNA ligase activity [GO:0004820];protein dimerization activity [GO:0046983];transferase activity [GO:0016740]	96	0	323.31	185040000000	1647	68.4	67.8	67.9	67.1	O23627;Q9FXG2	O23627	1242	At1g29880	Glycine--tRNA ligase, mitochondrial 1
257402877807617	257413425445557	258000335693359	257089614868164	nucleosome assembly [GO:0006334]	chloroplast stroma [GO:0009570];chloroplast thylakoid [GO:0009534];cytosol [GO:0005829];nucleolus [GO:0005730];nucleosome [GO:0000786]	DNA binding [GO:0003677];protein heterodimerization activity [GO:0046982]	22	0	4.9846	1528200000	30	69.3	77.3	77.3	79.3	O23629	O23629	1243	H2B	Histone H2B.6
288016242980957	287841300964355	287181968688965	286039943695068	amylopectin biosynthetic process [GO:0010021];carbohydrate metabolic process [GO:0005975];cellular response to fructose stimulus [GO:0071332];cellular response to glucose stimulus [GO:0071333];cellular response to light stimulus [GO:0071482];cellular response to sucrose stimulus [GO:0071329];glycogen biosynthetic process [GO:0005978];starch biosynthetic process [GO:0019252];starch metabolic proce…	amyloplast [GO:0009501];chloroplast [GO:0009507];chloroplast stroma [GO:0009570];cytoplasm [GO:0005737]	1,4-alpha-glucan branching enzyme activity (using a glucosylated glycogenin as primer for glycogen synthesis) [GO:0102752];1,4-alpha-glucan branching enzyme activity [GO:0003844];cation binding [GO:0043169];hydrolase activity, hydrolyzing O-glycosyl compounds [GO:0004553]	28	0	127.52	8381400000	219	25.6	29.7	24.9	24.2	O23647	O23647	1244	SBE2.1	1,4-alpha-glucan-branching enzyme 2-1, chloroplastic/amyloplastic
NaN	NaN	234437961578369	275945568084717	homoserine biosynthetic process [GO:0009090];lysine biosynthetic process via diaminopimelate [GO:0009089];threonine biosynthetic process [GO:0009088]	chloroplast stroma [GO:0009570];cytoplasm [GO:0005737]	aspartate kinase activity [GO:0004072];ATP binding [GO:0005524]	14	0	35.4	2620600000	66	1.1	1.1	1.1	2	O23653	O23653	1245	AK2	Aspartokinase 2, chloroplastic
331411895751953	330952339172363	331535034179688	331447944641113	ATP metabolic process [GO:0046034];Golgi organization [GO:0007030];pollen development [GO:0009555]	cell wall [GO:0005618];chloroplast [GO:0009507];chloroplast envelope [GO:0009941];cytosol [GO:0005829];Golgi apparatus [GO:0005794];mitochondrion [GO:0005739];plant-type vacuole [GO:0000325];plasma membrane [GO:0005886];plasmodesma [GO:0009506];proton-transporting V-type ATPase, V1 domain [GO:0033180];vacuolar membrane [GO:0005774];vacuole [GO:0005773]	ATP binding [GO:0005524];protease binding [GO:0002020];proton-transporting ATPase activity, rotational mechanism [GO:0046961]	82	0	323.31	347340000000	1582	78.3	76.2	76.1	71.3	O23654	O23654	1246	VHA-A	V-type proton ATPase catalytic subunit A
222113971710205	225527420043945	222159938812256	NaN	intracellular protein transport [GO:0006886];Rab protein signal transduction [GO:0032482]	endomembrane system [GO:0012505];Golgi apparatus [GO:0005794];nucleus [GO:0005634];plasma membrane [GO:0005886]	GTP binding [GO:0005525];GTPase activity [GO:0003924]	12	0	78.136	4577200000	61	5.2	5.2	9	3.8	O23657;O49841	O23657	1247	RABC1	Ras-related protein RABC1
277390518188477	274850063323975	277969303131104	277222099304199		chloroplast [GO:0009507]	oxidoreductase activity [GO:0016491]	15	0	26.335	3481600000	73	16.8	17.3	18.7	14.8	O23673	O23673	1248	At1g02020	Nitroreductase family protein
285270500183105	28513635635376	285784149169922	28753246307373	embryo development ending in seed dormancy [GO:0009793];mRNA processing [GO:0006397];mRNA transport [GO:0051028];nuclear-transcribed mRNA catabolic process, nonsense-mediated decay [GO:0000184];pollen tube guidance [GO:0010183];positive regulation of gene expression [GO:0010628];regulation of translation [GO:0006417];RNA splicing [GO:0008380]	exon-exon junction complex [GO:0035145];nuclear speck [GO:0016607];nucleolus [GO:0005730];nucleoplasm [GO:0005654];P-body [GO:0000932]	RNA binding [GO:0003723]	15	0	120.52	11732000000	150	52	60	59.3	64.7	O23676	O23676	1249	MAGO	Protein mago nashi homolog
285757141113281	277972393035889	283943157196045	275660171508789		chloroplast [GO:0009507];chloroplast stroma [GO:0009570]	DNA-directed 5'-3' RNA polymerase activity [GO:0003899]	7	0	51.957	4085800000	53	27.4	25.2	27.4	23.3	O23684	O23684	1250	At2g41950	At2g41950/T6D20.26
309245777130127	309652671813965	308729839324951	308823432922363	proteasomal protein catabolic process [GO:0010498];proteasomal ubiquitin-independent protein catabolic process [GO:0010499];proteasome-mediated ubiquitin-dependent protein catabolic process [GO:0043161];response to zinc ion [GO:0010043]	cytoplasm [GO:0005737];cytosol [GO:0005829];cytosolic ribosome [GO:0022626];nucleus [GO:0005634];proteasome complex [GO:0000502];proteasome core complex [GO:0005839];proteasome core complex, alpha-subunit complex [GO:0019773]	endopeptidase activity [GO:0004175];threonine-type endopeptidase activity [GO:0004298]	28	0	323.31	63352000000	485	96.6	89.4	96.6	89.4	O23708	O23708	1252	PAB1	Proteasome subunit alpha type-2-A
294227809906006	291399002075195	293238010406494	291585102081299	proteasomal protein catabolic process [GO:0010498];proteasomal ubiquitin-independent protein catabolic process [GO:0010499];proteasome-mediated ubiquitin-dependent protein catabolic process [GO:0043161]	cytoplasm [GO:0005737];cytosol [GO:0005829];nucleus [GO:0005634];proteasome complex [GO:0000502];proteasome core complex [GO:0005839];proteasome core complex, beta-subunit complex [GO:0019774]	endopeptidase activity [GO:0004175];threonine-type endopeptidase activity [GO:0004298]	24	0	180.41	25112000000	233	38.5	29.7	23.8	35.2	O23710	O23710	1253	PBB1	Proteasome subunit beta type-7-A
25684476852417	256036548614502	251109199523926	249353504180908	proteasomal protein catabolic process [GO:0010498];proteasomal ubiquitin-independent protein catabolic process [GO:0010499];proteasome-mediated ubiquitin-dependent protein catabolic process [GO:0043161]	cytoplasm [GO:0005737];cytosol [GO:0005829];nucleus [GO:0005634];plasma membrane [GO:0005886];plasmodesma [GO:0009506];proteasome complex [GO:0000502];proteasome core complex [GO:0005839];proteasome core complex, alpha-subunit complex [GO:0019773]	endopeptidase activity [GO:0004175];threonine-type endopeptidase activity [GO:0004298]	19	0	39.941	1546600000	40	55.6	50.2	46.6	46.9	O23712	O23712	1254	PAF2	Proteasome subunit alpha type-1-B
260363883972168	258640079498291	260210037231445	264864482879639	proteasomal protein catabolic process [GO:0010498];proteasomal ubiquitin-independent protein catabolic process [GO:0010499];proteasome-mediated ubiquitin-dependent protein catabolic process [GO:0043161]	apoplast [GO:0048046];cytoplasm [GO:0005737];cytosol [GO:0005829];nucleus [GO:0005634];plasma membrane [GO:0005886];proteasome complex [GO:0000502];proteasome core complex [GO:0005839];proteasome core complex, beta-subunit complex [GO:0019774];secretory vesicle [GO:0099503];vacuolar membrane [GO:0005774];vacuole [GO:0005773]	endopeptidase activity [GO:0004175];threonine-type endopeptidase activity [GO:0004298]	13	0	6.4133	2203300000	21	43.6	35.8	26	18.6	O23714	O23714	1255	PBD1	Proteasome subunit beta type-2-A
301991748809814	302639408111572	302677402496338	304045639038086	proteasomal protein catabolic process [GO:0010498];proteasomal ubiquitin-independent protein catabolic process [GO:0010499];proteasome-mediated ubiquitin-dependent protein catabolic process [GO:0043161];response to cadmium ion [GO:0046686];response to cold [GO:0009409]	apoplast [GO:0048046];cytoplasm [GO:0005737];cytosol [GO:0005829];nucleus [GO:0005634];peroxisome [GO:0005777];proteasome complex [GO:0000502];proteasome core complex [GO:0005839];proteasome core complex, alpha-subunit complex [GO:0019773];vacuolar membrane [GO:0005774];vacuole [GO:0005773]	endopeptidase activity [GO:0004175];threonine-type endopeptidase activity [GO:0004298]	32	0	310.18	43511000000	393	70.3	64.7	64.7	62.2	O23715	O23715	1256	PAG1	Proteasome subunit alpha type-3
297505664825439	295742340087891	298574485778809	299181213378906	proteasomal protein catabolic process [GO:0010498];proteasomal ubiquitin-independent protein catabolic process [GO:0010499];proteasome-mediated ubiquitin-dependent protein catabolic process [GO:0043161]	cytoplasm [GO:0005737];nucleus [GO:0005634];proteasome core complex [GO:0005839];proteasome core complex, beta-subunit complex [GO:0019774]	endopeptidase activity [GO:0004175];threonine-type endopeptidase activity [GO:0004298]	21	0	323.31	30430000000	258	71.9	68.2	69	59.5	O23717	O23717	1257	PBE1	Proteasome subunit beta type-5-A
306133346557617	305735301971436	306589794158936	305856666564941	isopentenyl diphosphate biosynthetic process, mevalonate pathway [GO:0019287];sterol biosynthetic process [GO:0016126]	cytosol [GO:0005829];peroxisome [GO:0005777]	ATP binding [GO:0005524];diphosphomevalonate decarboxylase activity [GO:0004163];identical protein binding [GO:0042802]	37	0	323.31	92531000000	489	57.3	55.1	53.4	55.8	O23722	O23722	1258	MVD1	Diphosphomevalonate decarboxylase MVD1, peroxisomal
226798152923584	256211471557617	227768974304199	2353883934021	innate immune response [GO:0045087];leaf morphogenesis [GO:0009965];proteasome-mediated ubiquitin-dependent protein catabolic process [GO:0043161]	cytosol [GO:0005829];plasma membrane [GO:0005886];proteasome complex [GO:0000502];proteasome regulatory particle [GO:0005838]		19	0	86.775	7537500000	128	17.9	22.4	16.9	14.9	O24412	O24412	1259	RPN8A	26S proteasome non-ATPase regulatory subunit 7 homolog A
304355926513672	305147457122803	304535617828369	304548358917236	cellular response to abscisic acid stimulus [GO:0071215];gibberellin mediated signaling pathway [GO:0010476];positive regulation of protein phosphorylation [GO:0001934];positive regulation of signal transduction [GO:0009967];regulation of translation [GO:0006417];rescue of stalled ribosome [GO:0072344];response to cadmium ion [GO:0046686];response to gibberellin [GO:0009739];response to glucose […	chloroplast [GO:0009507];cytoplasm [GO:0005737];cytosol [GO:0005829];cytosolic ribosome [GO:0022626];cytosolic small ribosomal subunit [GO:0022627];nucleus [GO:0005634];polysomal ribosome [GO:0042788]	enzyme binding [GO:0019899];MAP-kinase scaffold activity [GO:0005078];protein kinase C binding [GO:0005080];ribosome binding [GO:0043022];structural constituent of ribosome [GO:0003735]	48	0	323.31	142560000000	648	52	56.6	64.2	56.9	O24456	O24456	1261	RACK1A	Receptor for activated C kinase 1A
302668476104736	3034202003479	303635883331299	302467174530029	acetyl-CoA biosynthetic process from pyruvate [GO:0006086];glycolytic process [GO:0006096]	chloroplast [GO:0009507];chloroplast envelope [GO:0009941];chloroplast stroma [GO:0009570];plastid [GO:0009536]	pyruvate dehydrogenase (acetyl-transferring) activity [GO:0004739]	55	0	323.31	58769000000	704	56.8	64.3	61.7	56.8	O24457	O24457	1262	PDH-E1 ALPHA	Pyruvate dehydrogenase E1 component subunit alpha-3, chloroplastic
NaN	201578311920166	NaN	180502738952637	intracellular protein transport [GO:0006886];protein secretion [GO:0009306];Rab protein signal transduction [GO:0032482];regulation of exocytosis [GO:0017157];vesicle docking involved in exocytosis [GO:0006904]	cytosol [GO:0005829];endomembrane system [GO:0012505];Golgi membrane [GO:0000139];plasma membrane [GO:0005886]	GTP binding [GO:0005525];GTPase activity [GO:0003924]	9	0	5.2145	252860000	20	7.9	13.4	7.9	10.2	O24466	O24466	1263	RABE1A	Ras-related protein RABE1a
316726150512695	315661525726318	316349105834961	315355186462402	methylglyoxal catabolic process to D-lactate via S-lactoyl-glutathione [GO:0019243]	cytosol [GO:0005829];secretory vesicle [GO:0099503]	hydroxyacylglutathione hydrolase activity [GO:0004416];metal ion binding [GO:0046872]	27	0	323.31	46920000000	440	72.5	85.3	85.3	85.3	O24496	O24496	1264	GLX2-2	Hydroxyacylglutathione hydrolase cytoplasmic
225946178436279	NaN	241100444793701	NaN	cellular response to hypoxia [GO:0071456];oxygen transport [GO:0015671];response to hypoxia [GO:0001666]	cell wall [GO:0005618];cytosol [GO:0005829];plasma membrane [GO:0005886];plasmodesma [GO:0009506]	heme binding [GO:0020037];metal ion binding [GO:0046872];oxygen binding [GO:0019825]	6	0	9.5619	1153800000	34	5	0	14.4	0	O24520	O24520	1265	AHB1	Non-symbiotic hemoglobin 1
289790744781494	288600578308105	287278671264648	286721935272217	fatty acid metabolic process [GO:0006631];triglyceride biosynthetic process [GO:0019432]	cytosol [GO:0005829]	heme binding [GO:0020037];metal ion binding [GO:0046872];oxygen binding [GO:0019825];oxygen carrier activity [GO:0005344]	16	0	54.252	9646400000	149	69	60.1	45.6	74.1	O24521	O24521	1266	AHB2	Non-symbiotic hemoglobin 2
298226985931396	297088565826416	299969844818115	297598171234131	cell wall macromolecule catabolic process [GO:0016998];chitin catabolic process [GO:0006032];leaf senescence [GO:0010150];polysaccharide catabolic process [GO:0000272];response to amitrole [GO:0072722];response to silver ion [GO:0010272];response to virus [GO:0009615];systemic acquired resistance [GO:0009627]	apoplast [GO:0048046];secretory vesicle [GO:0099503]	chitin binding [GO:0008061];chitinase activity [GO:0004568]	16	0	272.73	12804000000	168	59.2	55.2	63.9	52	O24603	O24603	1268	CHI	Endochitinase CHI
237413940429688	242925643920898	238593692779541	236059169769287	proteasomal protein catabolic process [GO:0010498];proteasomal ubiquitin-independent protein catabolic process [GO:0010499];proteasome-mediated ubiquitin-dependent protein catabolic process [GO:0043161];ubiquitin-dependent protein catabolic process [GO:0006511]	cytoplasm [GO:0005737];nucleus [GO:0005634];plastid [GO:0009536];proteasome complex [GO:0000502];proteasome core complex [GO:0005839];proteasome core complex, alpha-subunit complex [GO:0019773];vacuole [GO:0005773]	endopeptidase activity [GO:0004175];threonine-type endopeptidase activity [GO:0004298]	19	0	12.977	456260000	15	50	50	50	60.8	O24616	O24616	1269	PAD2	Proteasome subunit alpha type-7-B
283760032653809	28362398147583	28304084777832	284468746185303	proteasomal protein catabolic process [GO:0010498];proteasomal ubiquitin-independent protein catabolic process [GO:0010499];proteasome-mediated ubiquitin-dependent protein catabolic process [GO:0043161]	cytoplasm [GO:0005737];nucleus [GO:0005634];proteasome core complex [GO:0005839];proteasome core complex, beta-subunit complex [GO:0019774]	endopeptidase activity [GO:0004175];threonine-type endopeptidase activity [GO:0004298]	20	0	104.82	12428000000	142	60.8	45.2	35.2	27.6	O24633	O24633	1270	PBD2	Proteasome subunit beta type-2-B
317673816680908	317105083465576	31721794128418	316774101257324	protein transport [GO:0015031];small GTPase mediated signal transduction [GO:0007264];vesicle-mediated transport [GO:0016192]	apoplast [GO:0048046];cytoplasm [GO:0005737];cytosol [GO:0005829];plasmodesma [GO:0009506]	GTPase activator activity [GO:0005096];Rab GDP-dissociation inhibitor activity [GO:0005093];Rab GTPase binding [GO:0017137]	56	0	323.31	133560000000	868	66.7	64.2	66	59.9	O24653	O24653	1271	GDI2	Guanosine nucleotide diphosphate dissociation inhibitor 2
290801982879639	291966438293457	292123165130615	293398342132568	cell wall macromolecule catabolic process [GO:0016998];chitin catabolic process [GO:0006032];defense response [GO:0006952];polysaccharide catabolic process [GO:0000272]	secretory vesicle [GO:0099503]	chitin binding [GO:0008061];chitinase activity [GO:0004568]	8	0	323.31	13659000000	204	32.6	22.3	38.6	36.7	O24658	O24658	1272	At2g43590	Endochitinase At2g43590
237842674255371	NaN	239975719451904	NaN	DNA strand elongation involved in DNA replication [GO:0006271]	delta DNA polymerase complex [GO:0043625];DNA polymerase complex [GO:0042575]	DNA binding [GO:0003677];DNA-directed DNA polymerase activity [GO:0003887]	5	0	4.1532	348480000	7	2.5	0	2.5	0	O48520	O48520	1273	POLD2	DNA polymerase delta small subunit
218489627838135	213783016204834	218003730773926	22014986038208	translation [GO:0006412]	cytosol [GO:0005829];cytosolic ribosome [GO:0022626];cytosolic small ribosomal subunit [GO:0022627];nucleolus [GO:0005730];plasma membrane [GO:0005886];plasmodesma [GO:0009506];polysomal ribosome [GO:0042788]	mRNA binding [GO:0003729];structural constituent of ribosome [GO:0003735]	44	0	248.56	42373000000	140	9.2	7.6	6	4.4	O48549	O48549	1276	RPS6A	40S ribosomal protein S6-1
270873985290527	273032150268555	279933452606201	274545040130615	cellular response to hypoxia [GO:0071456]		hydrolase activity [GO:0016787]	14	0	31.931	3790500000	91	47.1	38.8	44.7	46.3	O48587	O48587	1277	T19K24.16	At5g44730
306403942108154	307254962921143	307302837371826	307853450775146		cytosol [GO:0005829]	catalytic activity [GO:0003824];molybdenum ion binding [GO:0030151];pyridoxal phosphate binding [GO:0030170]	31	0	322.4	42305000000	378	78.2	74.7	66.6	55.8	O48588	O48588	1278	T19K24.17	Molybdenum cofactor sulfurase family protein
324758338928223	325425453186035	325730781555176	325289001464844	asparaginyl-tRNA aminoacylation [GO:0006421];plant ovule development [GO:0048481]	chloroplast [GO:0009507];chloroplast stroma [GO:0009570];mitochondrion [GO:0005739]	asparagine-tRNA ligase activity [GO:0004816];ATP binding [GO:0005524];DNA binding [GO:0003677]	37	0	323.31	79795000000	487	40.9	42.7	41.3	42.7	O48593	O48593	1279	SYNO	Asparagine--tRNA ligase, chloroplastic/mitochondrial
297825202941895	298920764923096	29865966796875	296714344024658	response to cadmium ion [GO:0046686];response to oxidative stress [GO:0006979]	chloroplast [GO:0009507];cytosol [GO:0005829];mitochondrion [GO:0005739];plasma membrane [GO:0005886]	glutathione peroxidase activity [GO:0004602];peroxidase activity [GO:0004601];phospholipid-hydroperoxide glutathione peroxidase activity [GO:0047066]	31	0	257.24	67014000000	404	56.9	56.9	67.2	68.5	O48646	O48646	1280	GPX6	Probable phospholipid hydroperoxide glutathione peroxidase 6, mitochondrial
305951271057129	306813545227051	303756523132324	303773078918457	polyamine biosynthetic process [GO:0006596];spermidine biosynthetic process [GO:0008295]	cytosol [GO:0005829];mitochondrion [GO:0005739];plasma membrane [GO:0005886]	spermidine synthase activity [GO:0004766]	23	0	323.31	42442000000	347	62.9	70	50.6	59.4	O48661	O48661	1281	SPDSYN2	Spermidine synthase 2
306471881866455	307119445800781	305011386871338	304971466064453	defense response by callose deposition in cell wall [GO:0052544];defense response to bacterium [GO:0042742];glucosinolate biosynthetic process [GO:0019761]	cytosol [GO:0005829];intracellular membrane-bounded organelle [GO:0043231];nucleus [GO:0005634]	quercetin 3-O-glucosyltransferase activity [GO:0080043];quercetin 7-O-glucosyltransferase activity [GO:0080044];thiohydroximate beta-D-glucosyltransferase activity [GO:0047251];UDP-glucose: 4-methylthiobutylhydroximate S-glucosyltransferase activity [GO:0102659];UDP-glucose: 6-methylthiohexylhydroximate S-glucosyltransferase activity [GO:0103100];UDP-glucose: 9-methylthiononylhydroximate S-glucos…	35	0	295.8	38003000000	483	50.9	43.3	51.7	45	O48676	O48676	1282	UGT74B1	UDP-glycosyltransferase 74B1
243306713104248	252840442657471	249673252105713	254882125854492	cell wall modification [GO:0042545];pectin catabolic process [GO:0045490];response to bacterium [GO:0009617]	cell wall [GO:0005618];extracellular region [GO:0005576]	aspartyl esterase activity [GO:0045330];pectinesterase activity [GO:0030599];pectinesterase inhibitor activity [GO:0046910]	5	0	10.406	872980000	27	1.8	1.8	1.8	1.8	O48711	O48711	1284	PME12	Probable pectinesterase/pectinesterase inhibitor 12
292131042480469	293340911865234	293219947814941	295711803436279	chloroplast accumulation movement [GO:0009904];chloroplast avoidance movement [GO:0009903]	cytosol [GO:0005829];peroxisome [GO:0005777];plasma membrane [GO:0005886]		25	0	62.364	11335000000	151	23.8	21.7	18.8	17.7	O48724	O48724	1286	WEB1	Protein WEAK CHLOROPLAST MOVEMENT UNDER BLUE LIGHT 1
256488609313965	26091136932373	254332313537598	25140983581543	ubiquitin-dependent protein catabolic process [GO:0006511]	cytoplasm [GO:0005737];nucleus [GO:0005634];proteasome regulatory particle, lid subcomplex [GO:0008541]	endopeptidase activator activity [GO:0061133];proteasome binding [GO:0070628];ubiquitin binding [GO:0043130]	8	0	25.24	1117600000	33	14.7	14.7	11.7	8.3	O48726	O48726	1287	RPN13	26S proteasome regulatory subunit RPN13
302773056030273	299472618103027	301577396392822	301191673278809	cell redox homeostasis [GO:0045454];glycerol ether metabolic process [GO:0006662];negative regulation of catalytic activity [GO:0043086];positive regulation of catalytic activity [GO:0043085];regulation of carbohydrate metabolic process [GO:0006109];response to cold [GO:0009409]	apoplast [GO:0048046];chloroplast [GO:0009507];chloroplast envelope [GO:0009941];chloroplast stroma [GO:0009570];cytoplasm [GO:0005737];extracellular region [GO:0005576];stromule [GO:0010319];thylakoid [GO:0009579]	enzyme activator activity [GO:0008047];enzyme inhibitor activity [GO:0004857];oxidoreductase activity, acting on a sulfur group of donors, disulfide as acceptor [GO:0016671];protein disulfide oxidoreductase activity [GO:0015035];protein-disulfide reductase activity [GO:0047134]	13	0	228.03	12460000000	144	39.7	39.7	39.7	38.5	O48737	O48737	1288	At1g03680	Thioredoxin M1, chloroplastic
326005859375	326072158813477	326635665893555	325064468383789	chlorophyll biosynthetic process [GO:0015995];photosynthesis [GO:0015979]	chloroplast [GO:0009507];chloroplast envelope [GO:0009941];chloroplast membrane [GO:0031969];chloroplast thylakoid [GO:0009534];chloroplast thylakoid membrane [GO:0009535];extracellular region [GO:0005576]	NADPH dehydrogenase activity [GO:0003959];protochlorophyllide reductase activity [GO:0016630]	43	0	323.31	55395000000	515	74.1	75.8	70.6	66.1	O48741	O48741	1289	PORC	Protochlorophyllide reductase C, chloroplastic
225640926361084	NaN	NaN	231318225860596	cytokinesis by cell plate formation [GO:0000911];microtubule nucleation [GO:0007020];microtubule organizing center organization [GO:0031023];mitotic cell cycle [GO:0000278];spindle assembly [GO:0051225]	microtubule [GO:0005874]		2	0.0057595	1.7565	117120000	1	3.7	0	0	7.4	O48767	O48767	1290	AUG2	AUGMIN subunit 2
294494342803955	29514274597168	294251842498779	292850017547607	cell redox homeostasis [GO:0045454];response to endoplasmic reticulum stress [GO:0034976]	endoplasmic reticulum [GO:0005783];endoplasmic reticulum lumen [GO:0005788];Golgi apparatus [GO:0005794];plasma membrane [GO:0005886];vacuole [GO:0005773]	protein disulfide isomerase activity [GO:0003756]	26	0	193.07	19444000000	359	43.2	43.6	35.9	38.9	O48773	O48773	1291	PDIL2-3	Protein disulfide-isomerase 2-3
243447570800781	246816921234131	250650081634521	24737943649292	carbohydrate metabolic process [GO:0005975]		beta-glucosidase activity [GO:0008422];scopolin beta-glucosidase activity [GO:0102483]	6	0	11.725	498830000	31	2	4.1	3.1	2	O48779	O48779	1292	BGLU33	Beta-glucosidase 33
288142719268799	288983631134033	28655912399292	287861881256104	carotenoid biosynthetic process [GO:0016117];cellular response to UV-C [GO:0071494];chloroplast-nucleus signaling pathway [GO:0010019];flavonoid biosynthetic process [GO:0009813];heme oxidation [GO:0006788];photosynthesis [GO:0015979];phytochromobilin biosynthetic process [GO:0010024];regulation of meristem growth [GO:0010075];regulation of stomatal movement [GO:0010119]	chloroplast [GO:0009507]	heme binding [GO:0020037];heme oxygenase (decyclizing) activity [GO:0004392];metal ion binding [GO:0046872]	17	0	30.639	4565300000	94	40.1	35.8	36.2	40.1	O48782	O48782	1293	HO1	Heme oxygenase 1, chloroplastic
280845623016357	283610172271729	283673629760742	281129684448242		integral component of membrane [GO:0016021];peroxisome [GO:0005777];plasma membrane [GO:0005886]	ATP binding [GO:0005524];protein kinase activity [GO:0004672]	15	0	107.66	5095200000	85	16.1	20.7	18.2	17.9	O48788	O48788	1294	At2g26730	Probable inactive receptor kinase At2g26730
302560863494873	30219165802002	302193965911865	302329502105713		cytosol [GO:0005829];nucleus [GO:0005634]		48	0	323.31	32204000000	479	54.5	52.5	54.3	52.9	O48802	O48802	1295	CLMP1	Protein CLMP1
245036697387695	247910404205322	247255687713623	254009666442871	plant-type cell wall organization [GO:0009664];syncytium formation [GO:0006949]	cytosol [GO:0005829];extracellular region [GO:0005576];membrane [GO:0016020];plant-type cell wall [GO:0009505];plasmodesma [GO:0009506]		2	0.0014848	2.2519	457370000	5	3.5	3.5	3.5	3.5	O48818	O48818	1296	EXPA4	Expansin-A4
315541687011719	31627405166626	3147971534729	314336051940918	circadian rhythm [GO:0007623];response to abscisic acid [GO:0009737];response to cold [GO:0009409];response to high light intensity [GO:0009644];response to salt stress [GO:0009651];response to water deprivation [GO:0009414]	chloroplast [GO:0009507];plasma membrane [GO:0005886]		43	0	323.31	70586000000	672	71.7	64.2	69.7	70.1	O48832	O48832	1297	ERD7	Protein EARLY-RESPONSIVE TO DEHYDRATION 7, chloroplastic
282709293365479	280058708190918	285736560821533	282429981231689	proteasome-mediated ubiquitin-dependent protein catabolic process [GO:0043161];regulation of protein catabolic process [GO:0042176]	cytosol [GO:0005829];endoplasmic reticulum [GO:0005783];nucleus [GO:0005634];proteasome complex [GO:0000502];proteasome regulatory particle, base subcomplex [GO:0008540];proteasome storage granule [GO:0034515]	enzyme regulator activity [GO:0030234]	61	0	323.31	42735000000	411	23.4	21.9	20.3	17.8	O48844	O48844	1298	RPN2A	26S proteasome non-ATPase regulatory subunit 1 homolog A
305945930480957	306647529602051	310322303771973	307152214050293	cellular response to phosphate starvation [GO:0016036];glycolipid biosynthetic process [GO:0009247];sulfolipid biosynthetic process [GO:0046506]	chloroplast [GO:0009507];plasma membrane [GO:0005886]	sulfotransferase activity [GO:0008146];UDPsulfoquinovose synthase activity [GO:0046507];zinc ion binding [GO:0008270]	31	0	323.31	36821000000	439	43.8	44.4	48.2	48.6	O48917	O48917	1300	SQD1	UDP-sulfoquinovose synthase, chloroplastic
312982177734375	308620834350586	306725292205811	312629890441895	chloroplast accumulation movement [GO:0009904];chloroplast avoidance movement [GO:0009903];circadian rhythm [GO:0007623];negative regulation of anion channel activity by blue light [GO:0010362];phototropism [GO:0009638];protein autophosphorylation [GO:0046777];protein phosphorylation [GO:0006468];protein-chromophore linkage [GO:0018298];regulation of proton transport [GO:0010155];regulation of st…	cell surface [GO:0009986];cytoplasm [GO:0005737];cytoplasmic side of plasma membrane [GO:0009898];nucleus [GO:0005634];plasma membrane [GO:0005886];vacuole [GO:0005773]	ATP binding [GO:0005524];blue light photoreceptor activity [GO:0009882];FMN binding [GO:0010181];identical protein binding [GO:0042802];kinase activity [GO:0016301];mRNA binding [GO:0003729];protein kinase activity [GO:0004672];protein serine/threonine kinase activity [GO:0004674]	37	0	234.17	18636000000	230	33.3	33.3	35.3	35.9	O48963	O48963	1302	PHOT1	Phototropin-1
298852996826172	298314838409424	301332015991211	300315742492676	cell wall modification [GO:0042545];defense response to Gram-negative bacterium [GO:0050829];pectin catabolic process [GO:0045490];response to fungus [GO:0009620];response to nematode [GO:0009624]	apoplast [GO:0048046];cell wall [GO:0005618];cytoplasm [GO:0005737];cytosol [GO:0005829];plasma membrane [GO:0005886]	aspartyl esterase activity [GO:0045330];pectinesterase activity [GO:0030599];pectinesterase inhibitor activity [GO:0046910]	22	0	297.2	16007000000	221	29.7	25.2	28.7	28.4	O49006	O49006	1303	PME3	Pectinesterase/pectinesterase inhibitor 3
207024402618408	245750198364258	211887607574463	211236362457275	formation of cytoplasmic translation initiation complex [GO:0001732];translational initiation [GO:0006413]	cytosol [GO:0005829];eukaryotic 43S preinitiation complex [GO:0016282];eukaryotic 48S preinitiation complex [GO:0033290];eukaryotic translation initiation factor 3 complex [GO:0005852];nucleus [GO:0005634]	mRNA binding [GO:0003729];translation initiation factor activity [GO:0003743];translation initiation factor binding [GO:0031369]	83	0	323.31	80250000000	526	3.7	0.8	4.3	2.1	O49160	O49160	1305	TIF3C1	Eukaryotic translation initiation factor 3 subunit C
255535316467285	260420360565186	256293430328369	254260158538818	defense response [GO:0006952];response to jasmonic acid [GO:0009753]	vacuole [GO:0005773]	acid phosphatase activity [GO:0003993];nutrient reservoir activity [GO:0045735];transcription factor binding [GO:0008134]	9	0	88.954	1576300000	61	8.5	8.5	8.5	8.1	O49195	O49195	1306	VSP1	Vegetative storage protein 1
331330337524414	330574989318848	331665954589844	329383316040039	CTP biosynthetic process [GO:0006241];GTP biosynthetic process [GO:0006183];purine nucleotide metabolic process [GO:0006163];pyrimidine nucleotide metabolic process [GO:0006220];response to oxidative stress [GO:0006979];UTP biosynthetic process [GO:0006228]	chloroplast thylakoid lumen [GO:0009543];cytosol [GO:0005829];mitochondrial inner membrane [GO:0005743];mitochondrial intermembrane space [GO:0005758];mitochondrion [GO:0005739];plastid [GO:0009536]	ATP binding [GO:0005524];cobalt ion binding [GO:0050897];nucleoside diphosphate kinase activity [GO:0004550];zinc ion binding [GO:0008270]	24	0	323.31	219410000000	669	48.7	48.7	48.7	48.7	O49203	O49203	1308	NDPK3	Nucleoside diphosphate kinase III, chloroplastic/mitochondrial
250363674163818	NaN	249872417449951	248868350982666	'de novo' GDP-L-fucose biosynthetic process [GO:0042351];L-fucose biosynthetic process [GO:0006005]		GDP-L-fucose synthase activity [GO:0050577];isomerase activity [GO:0016853]	23	0	60.457	3873100000	78	23.8	17	23.8	23.5	O49213	O49213	1309	GER1	GDP-L-fucose synthase 1
NaN	NaN	242467727661133	238177280426025		cytosol [GO:0005829]	amino acid binding [GO:0016597]	20	0	89.116	4309500000	72	0	0	2.9	2.9	O49285	O49285	1310	ACR3	ACT domain-containing protein ACR3
257100658416748	261506023406982	260134830474854	257570495605469	rRNA processing [GO:0006364]	nucleolus [GO:0005730]	ATP binding [GO:0005524];RNA binding [GO:0003723];RNA helicase activity [GO:0003724]	14	0	12.117	1940300000	25	1.4	1.4	2.6	2.6	O49289	O49289	1311	RH29	Putative DEAD-box ATP-dependent RNA helicase 29
307800350189209	307527046203613	308037815093994	307993106842041		chloroplast [GO:0009507];chloroplast stroma [GO:0009570]	carboxyvinyl-carboxyphosphonate phosphorylmutase activity [GO:0008807]	18	0	252.79	19616000000	203	50.7	49	51	49	O49290	O49290	1312	At1g77060	Carboxyvinyl-carboxyphosphonate phosphorylmutase, chloroplastic
292298374176025	293561973571777	299458675384521	300654811859131	photosynthesis [GO:0015979]	chloroplast [GO:0009507];chloroplast stroma [GO:0009570];chloroplast thylakoid [GO:0009534];chloroplast thylakoid lumen [GO:0009543];cytosol [GO:0005829];extrinsic component of membrane [GO:0019898];mitochondrion [GO:0005739];photosystem II oxygen evolving complex [GO:0009654];thylakoid [GO:0009579];thylakoid lumen [GO:0031977]	calcium ion binding [GO:0005509]	12	0	66.397	13620000000	128	41.5	40.8	41.5	41.5	O49292	O49292	1313	PPD4	PsbP domain-containing protein 4, chloroplastic
318057823181152	317953681945801	318580875396729	318576793670654	carbohydrate metabolic process [GO:0005975];glucose metabolic process [GO:0006006];response to cadmium ion [GO:0046686]	cytoplasm [GO:0005737];cytosol [GO:0005829];nucleus [GO:0005634];plasma membrane [GO:0005886]	magnesium ion binding [GO:0000287];phosphoglucomutase activity [GO:0004614]	86	0	323.31	261390000000	1160	71.5	63.6	66	65.9	O49299	O49299	1314	At1g23190	Probable phosphoglucomutase, cytoplasmic 1
275294723510742	277603397369385	280662002563477	276899242401123	abscisic acid-activated signaling pathway [GO:0009738];positive regulation of abscisic acid-activated signaling pathway [GO:0009789];positive regulation of GTPase activity [GO:0043547]	cytosol [GO:0005829];nucleus [GO:0005634];plasma membrane [GO:0005886]	GTPase activator activity [GO:0005096];metal ion binding [GO:0046872];phospholipid binding [GO:0005543]	10	0	29.115	4981200000	82	42.4	32.1	15.8	31.5	O49303	O49303	1315	CAR8	Protein C2-DOMAIN ABA-RELATED 8
318884525299072	320740280151367	31996244430542	319323425292969	defense response [GO:0006952]	cytosol [GO:0005829];nucleus [GO:0005634]		25	0	198.22	56482000000	349	82.5	76.2	84.4	82.5	O49304	O49304	1316	At1g23130	At1g23130/T26J12_10
253191719055176	251895980834961	255202827453613	249764003753662	defense response [GO:0006952]			2	0.004366	1.9007	436320000	5	6.8	6.8	6.8	6.8	O49305	O49305	1317	At1g23120	At1g23120
254296588897705	251037368774414	248379783630371	249787139892578	defense response [GO:0006952];protein phosphorylation [GO:0006468]	peroxisome [GO:0005777];plasma membrane [GO:0005886];plasmodesma [GO:0009506]	ATP binding [GO:0005524];non-membrane spanning protein tyrosine kinase activity [GO:0004715];protein kinase binding [GO:0019901];transmembrane receptor protein serine/threonine kinase activity [GO:0004675]	5	0	9.3105	678460000	14	2.7	5.2	10.9	5.7	O49339;Q8H1G6;Q9ZW72	O49339	1318	PTI12;PTI11	PTI1-like tyrosine-protein kinase 2;PTI1-like tyrosine-protein kinase 1
241496524810791	239117774963379	239060974121094	235766944885254	chloroplast RNA modification [GO:1900865];cytidine to uridine editing [GO:0016554];mitochondrial mRNA modification [GO:0080156];mitochondrial RNA modification [GO:1900864];mRNA processing [GO:0006397]	chloroplast [GO:0009507];mitochondrion [GO:0005739]	protein dimerization activity [GO:0046983]	2	0	24.541	583110000	15	3.1	3.1	3.1	3.1	O49429	O49429	1321	MORF1	Multiple organellar RNA editing factor 1, mitochondrial
315723552703857	313501586914063	315775871276855	314855346679688		cytosol [GO:0005829];plasma membrane [GO:0005886]	mRNA binding [GO:0003729]	19	0	323.31	49385000000	307	80.4	85.6	80.4	85.6	O49453	O49453	1323	At4g28440	Uncharacterized protein At4g28440
NaN	239275054931641	23986156463623	NaN	chaperone cofactor-dependent protein refolding [GO:0051085]	cytosol [GO:0005829]	chaperone binding [GO:0051087];unfolded protein binding [GO:0051082]	5	0	17.475	307740000	13	0	3.4	5.5	0	O49457	O49457	1324	F20O9.160	DNAJ heat shock family protein
296166667938232	296574974060059	297064208984375	297492084503174	lignin biosynthetic process [GO:0009809]	cytosol [GO:0005829]	cinnamyl-alcohol dehydrogenase activity [GO:0045551];oxidoreductase activity, acting on the CH-OH group of donors, NAD or NADP as acceptor [GO:0016616];sinapyl alcohol dehydrogenase activity [GO:0052747];zinc ion binding [GO:0008270]	39	0	323.31	53610000000	463	66.1	58.3	56.3	63.3	O49482	O49482	1325	CAD5	Cinnamyl alcohol dehydrogenase 5
334475135803223	334186553955078	33345458984375	333429489135742	cellular amino acid metabolic process [GO:0006520];embryo development ending in seed dormancy [GO:0009793];L-serine biosynthetic process [GO:0006564];megagametogenesis [GO:0009561];pollen development [GO:0009555];sulfur amino acid metabolic process [GO:0000096]	chloroplast [GO:0009507];chloroplast stroma [GO:0009570];mitochondrion [GO:0005739];plasma membrane [GO:0005886];plastid [GO:0009536]	ATP binding [GO:0005524];NAD binding [GO:0051287];phosphoglycerate dehydrogenase activity [GO:0004617]	57	0	323.31	321660000000	1312	63.8	57.4	63.8	62.7	O49485	O49485	1326	PGDH1	D-3-phosphoglycerate dehydrogenase 1, chloroplastic
312532711029053	313536853790283	31278247833252	311322841644287	coumarin biosynthetic process [GO:0009805];lignin biosynthetic process [GO:0009809];methylation [GO:0032259];response to cadmium ion [GO:0046686]	cytosol [GO:0005829];plasma membrane [GO:0005886]	caffeoyl-CoA O-methyltransferase activity [GO:0042409];metal ion binding [GO:0046872];S-adenosylmethionine-dependent methyltransferase activity [GO:0008757]	38	0	323.31	249690000000	1093	96.5	93.8	86.1	81.1	O49499	O49499	1327	CCOAOMT1	Caffeoyl-CoA O-methyltransferase 1
246515731811523	244952754974365	245683670043945	236254463195801	intracellular protein transport [GO:0006886];Rab protein signal transduction [GO:0032482]	cytosol [GO:0005829];endomembrane system [GO:0012505];endosome [GO:0005768];plasma membrane [GO:0005886]	GTP binding [GO:0005525];GTPase activity [GO:0003924]	5	0	5.507	1078700000	20	9.7	5.1	5.1	5.1	O49513	O49513	1329	RABA1E	Ras-related protein RABA1e
287889270782471	287393093109131	290026817321777	287705841064453	[2Fe-2S] cluster assembly [GO:0044571];iron-sulfur cluster assembly [GO:0016226]	cytosol [GO:0005829];mitochondrion [GO:0005739];plastid [GO:0009536]	ATP binding [GO:0005524];cysteine desulfurase activity [GO:0031071];iron-sulfur cluster binding [GO:0051536];pyridoxal phosphate binding [GO:0030170];zinc ion binding [GO:0008270]	38	0	323.31	36446000000	374	39.5	41.1	44.2	36.4	O49543	O49543	1331	NIFS1	Cysteine desulfurase, mitochondrial
NaN	240712013244629	NaN	250903091430664	cell differentiation [GO:0030154];floral organ development [GO:0048437];gametophyte development [GO:0048229];hormone-mediated signaling pathway [GO:0009755];regulation of meristem growth [GO:0010075];regulation of meristem structural organization [GO:0009934]	integral component of membrane [GO:0016021];plasma membrane [GO:0005886]	ATP binding [GO:0005524];identical protein binding [GO:0042802];protein self-association [GO:0043621];protein serine/threonine kinase activity [GO:0004674];receptor serine/threonine kinase binding [GO:0033612]	5	0.00094073	2.4805	1030200000	11	0	1.4	0	0.7	O49545	O49545	1332	BAM1	Leucine-rich repeat receptor-like serine/threonine-protein kinase BAM1
240641460418701	230675621032715	248275489807129	259492683410645	embryo development ending in seed dormancy [GO:0009793];nucleotide-excision repair [GO:0006289];proteasome-mediated ubiquitin-dependent protein catabolic process [GO:0043161];protein ubiquitination [GO:0016567];red, far-red light phototransduction [GO:0009585]	cullin-RING ubiquitin ligase complex [GO:0031461];cytosol [GO:0005829];nucleus [GO:0005634]	damaged DNA binding [GO:0003684]	31	0	20.035	2910400000	82	9.2	9.5	7.3	12.8	O49552	O49552	1333	DDB1B	DNA damage-binding protein 1b
225643253326416	243685302734375	250631580352783	246658992767334	mRNA splicing, via spliceosome [GO:0000398]	cytosol [GO:0005829];spliceosomal complex [GO:0005681]		5	0	15.801	769870000	29	7.6	7.6	18.6	7.6	O49553	O49553	1334	At4g21110	AT4g21110/F7J7_50
296081962585449	299276180267334	298446521759033	298692226409912		chloroplast [GO:0009507];chloroplast stroma [GO:0009570]	ATP binding [GO:0005524];phosphoprotein phosphatase activity [GO:0004721];phosphotransferase activity, phosphate group as acceptor [GO:0016776];protein kinase activity [GO:0004672];protein serine/threonine kinase activity [GO:0004674]	38	0	323.31	28990000000	376	51.9	62	56.6	52.9	O49562	O49562	1335	RP1	Pyruvate, phosphate dikinase regulatory protein 1, chloroplastic
243790149688721	246250553131104	241042957305908	239455661773682	chromatin assembly or disassembly [GO:0006333]	chromatin [GO:0000785];cytosol [GO:0005829];nucleus [GO:0005634]	chromatin binding [GO:0003682];DNA binding [GO:0003677];DNA-binding transcription factor activity [GO:0003700];structural constituent of chromatin [GO:0030527]	5	0	10.987	751010000	19	14.6	24.3	18.1	18.1	O49596	O49596	1337	HMGB2	High mobility group B protein 2
249282741546631	249980888366699	248963832855225	250020446777344	negative regulation of catalytic activity [GO:0043086];response to karrikin [GO:0080167]	vacuole [GO:0005773]	enzyme inhibitor activity [GO:0004857]	5	0	9.5103	846080000	16	10	10	10	5	O49603	O49603	1338	C/VIF2	Cell wall / vacuolar inhibitor of fructosidase 2
277431678771973	277406616210938	277989711761475	281147079467773	plant-type cell wall modification [GO:0009827]	plasma membrane [GO:0005886]	serine-type endopeptidase activity [GO:0004252];serine-type peptidase activity [GO:0008236]	24	0	144.92	14027000000	181	8.9	14	10.6	12	O49607	O49607	1339	SBT1.6	Subtilisin-like protease SBT1.6
253914928436279	257117481231689	259374847412109	24787956237793	cellular iron ion homeostasis [GO:0006879];iron-sulfur cluster assembly [GO:0016226]	cytoplasm [GO:0005737];cytosol [GO:0005829];mitochondrial matrix [GO:0005759];mitochondrion [GO:0005739]	2 iron, 2 sulfur cluster binding [GO:0051537];4 iron, 4 sulfur cluster binding [GO:0051539];ferrous iron binding [GO:0008198];structural molecule activity [GO:0005198]	8	0	48.586	2105400000	34	23.4	22.2	16.8	24	O49627	O49627	1341	ISU1	Iron-sulfur cluster assembly protein 1
284346790313721	285322246551514	285192337036133	283185958862305		chloroplast [GO:0009507];chloroplast thylakoid [GO:0009534];chloroplast thylakoid membrane [GO:0009535];cytosol [GO:0005829];mitochondrion [GO:0005739];plastoglobule [GO:0010287];thylakoid [GO:0009579];thylakoid lumen [GO:0031977]		12	0	102.2	5670500000	103	37.1	50	45.8	41.6	O49629	O49629	1342	PAP2	Probable plastid-lipid-associated protein 2, chloroplastic
273976249694824	271164436340332	274205341339111	275673961639404	tRNA threonylcarbamoyladenosine modification [GO:0002949]	cytosol [GO:0005829];EKC/KEOPS complex [GO:0000408];nucleus [GO:0005634]	metal ion binding [GO:0046872];N(6)-L-threonylcarbamoyladenine synthase activity [GO:0061711]	10	0	70.028	5280900000	94	16.4	12.2	16.4	20.7	O49653	O49653	1343	GCP2	Probable tRNA N6-adenosine threonylcarbamoyltransferase
293110122680664	295357131958008	297831935882568	291245765686035	carotene catabolic process [GO:0016121]	chloroplast [GO:0009507];chloroplast stroma [GO:0009570];cytosol [GO:0005829];plastoglobule [GO:0010287]	carotenoid dioxygenase activity [GO:0010436];metal ion binding [GO:0046872]	34	0	155.45	17323000000	293	41.8	46.6	42.9	41	O49675	O49675	1345	CCD4	Probable carotenoid cleavage dioxygenase 4, chloroplastic
294475250244141	294288425445557	294819488525391	293642139434814	abscisic acid-activated signaling pathway [GO:0009738];positive regulation of response to water deprivation [GO:1902584];regulation of protein serine/threonine phosphatase activity [GO:0080163]	cytoplasm [GO:0005737];cytosol [GO:0005829];nucleus [GO:0005634];plasma membrane [GO:0005886]	abscisic acid binding [GO:0010427];identical protein binding [GO:0042802];protein homodimerization activity [GO:0042803];protein phosphatase inhibitor activity [GO:0004864];signaling receptor activity [GO:0038023]	19	0	166.08	19557000000	300	77	64.9	81.7	69.6	O49686	O49686	1346	PYR1	Abscisic acid receptor PYR1
370981025695801	369909553527832	370487251281738	37012134552002	DNA methylation-dependent heterochromatin assembly [GO:0006346];methionine biosynthetic process [GO:0009086];methylation [GO:0032259];positive regulation of histone H3-K9 methylation [GO:0051574];response to cadmium ion [GO:0046686];response to zinc ion [GO:0010043]	apoplast [GO:0048046];chloroplast [GO:0009507];chloroplast stroma [GO:0009570];cytosol [GO:0005829];extracellular region [GO:0005576];peroxisome [GO:0005777];plasma membrane [GO:0005886];plasmodesma [GO:0009506];vacuolar membrane [GO:0005774]	5-methyltetrahydropteroyltriglutamate-homocysteine S-methyltransferase activity [GO:0003871];copper ion binding [GO:0005507];methionine synthase activity [GO:0008705];zinc ion binding [GO:0008270]	122	0	323.31	3069400000000	5957	89.8	88.9	89.7	87.2	O50008	O50008	1348	MS1	5-methyltetrahydropteroyltriglutamate--homocysteine methyltransferase 1
308373317718506	307860469818115	305972595214844	305700054168701	arginine biosynthetic process via ornithine [GO:0042450];citrulline biosynthetic process [GO:0019240]	chloroplast [GO:0009507];chloroplast stroma [GO:0009570];intracellular membrane-bounded organelle [GO:0043231]	amino acid binding [GO:0016597];ornithine carbamoyltransferase activity [GO:0004585]	26	0	155.18	28306000000	389	43.7	44.8	53.9	43.2	O50039	O50039	1349	OTC	Ornithine carbamoyltransferase, chloroplastic
241786613464355	243054256439209	239448528289795	244100875854492	translation [GO:0006412]	chloroplast [GO:0009507];chloroplast stroma [GO:0009570];chloroplast thylakoid membrane [GO:0009535];cytosolic ribosome [GO:0022626];extracellular region [GO:0005576];nucleus [GO:0005634];plastid large ribosomal subunit [GO:0000311];thylakoid [GO:0009579]	poly(U) RNA binding [GO:0008266];rRNA binding [GO:0019843];structural constituent of ribosome [GO:0003735]	3	0	7.3966	277710000	12	12.4	7.4	7.4	4.3	O50061	O50061	1350	RPL4	50S ribosomal protein L4, chloroplastic
30581901550293	30583517074585	307651710510254	308112277984619	formation of translation preinitiation complex [GO:0001731];positive regulation of translational fidelity [GO:0045903]	cytoplasm [GO:0005737];cytosol [GO:0005829];eukaryotic translation initiation factor 2 complex [GO:0005850];extracellular region [GO:0005576]	GTP binding [GO:0005525];GTPase activity [GO:0003924];translation initiation factor activity [GO:0003743]	34	0	233.13	41620000000	448	50.3	49.9	49.2	50.8	O64490	O64490	1351	EIF2 GAMMA	Eukaryotic translation initiation factor 2 gamma subunit
306597442626953	308833637237549	307711658477783	304011077880859	defense response [GO:0006952];positive regulation of programmed cell death [GO:0043068];protein autoprocessing [GO:0016540]	cytoplasm [GO:0005737];cytosol [GO:0005829];mitochondrion [GO:0005739];plasma membrane [GO:0005886];plasmodesma [GO:0009506]	cysteine-type endopeptidase activity [GO:0004197];cysteine-type peptidase activity [GO:0008234];identical protein binding [GO:0042802]	46	0	323.31	60270000000	508	46.9	41.4	37.6	36.6	O64517	O64517	1352	AMC4	Metacaspase-4
316016941070557	315511016845703	316317920684814	315341281890869	embryo development ending in seed dormancy [GO:0009793];transsulfuration [GO:0019346]	chloroplast [GO:0009507];cytosol [GO:0005829];mitochondrion [GO:0005739]	3-mercaptopyruvate sulfurtransferase activity [GO:0016784];sulfurtransferase activity [GO:0016783];thiosulfate sulfurtransferase activity [GO:0004792]	31	0	323.31	84438000000	646	66.5	66.2	57.5	64.1	O64530	O64530	1354	STR1	Thiosulfate/3-mercaptopyruvate sulfurtransferase 1, mitochondrial
274941921234131	277841300964355	276717548370361	274995250701904	catabolic process [GO:0009056]		hydrolase activity [GO:0016787];methyl indole-3-acetate esterase activity [GO:0080030]	12	0	59.719	3397000000	61	17.6	26.7	22.5	26.4	O64640	O64640	1356	CXE8	Probable carboxylesterase 8
236175079345703	235772705078125	222301979064941	215392894744873	response to abscisic acid [GO:0009737];response to salt stress [GO:0009651]	cytosol [GO:0005829];nucleolus [GO:0005730]		6	0	9.8419	1050800000	27	21.7	21.7	10.5	10.5	O64644	O64644	1358	At2g45640	Histone deacetylase complex subunit SAP18
2816259765625	281187725067139	280501461029053	279268836975098		anchored component of membrane [GO:0031225];endoplasmic reticulum [GO:0005783];plant-type cell wall [GO:0009505];plasma membrane [GO:0005886]		14	0	76.986	2977300000	64	31.4	24.9	29.4	26.4	O64696	O64696	1362	At2g34510	Uncharacterized protein At2g34510
257330379486084	257606067657471	253518829345703	257517223358154	nitrogen compound metabolic process [GO:0006807];positive regulation of catalytic activity [GO:0043085]		GTP binding [GO:0005525];GTPase activity [GO:0003924];nickel cation binding [GO:0016151]	21	0	225.69	10630000000	125	19.6	13.8	19.6	20	O64700	O64700	1363	UREG	Urease accessory protein G
288247184753418	291146087646484	290429916381836	285203952789307	cellular response to light stimulus [GO:0071482];peptidyl-threonine dephosphorylation [GO:0035970];thylakoid membrane organization [GO:0010027]	chloroplast [GO:0009507];chloroplast stroma [GO:0009570]	metal ion binding [GO:0046872];phosphoprotein phosphatase activity [GO:0004721]	8	0	51.298	5267800000	74	22.5	22.5	22.5	22.5	O64730	O64730	1365	At2g30170	Probable protein phosphatase 2C 26
291288089752197	292889442443848	292646789550781	294555225372314	regulation of flower development [GO:0009909]	cytoplasm [GO:0005737];cytosol [GO:0005829];intracellular membrane-bounded organelle [GO:0043231];nucleus [GO:0005634]	UDP-glycosyltransferase activity [GO:0008194]	23	0	103.21	10303000000	251	35.6	33	34.5	38.9	O64733	O64733	1366	UGT87A2	UDP-glycosyltransferase 87A2
282922401428223	283662376403809	282875366210938	283755474090576	COPII-coated vesicle budding [GO:0090114];mRNA transport [GO:0051028];protein transport [GO:0015031]	COPII vesicle coat [GO:0030127];cytosol [GO:0005829];endoplasmic reticulum [GO:0005783];Golgi membrane [GO:0000139];nuclear envelope [GO:0005635];nuclear pore [GO:0005643];nuclear pore outer ring [GO:0031080];nucleolus [GO:0005730]	structural molecule activity [GO:0005198]	29	0	323.31	29425000000	271	28.5	53	36.8	19.5	O64740	O64740	1367	SEC13B	Protein transport protein SEC13 homolog B
278783588409424	277383441925049	277535343170166	278440380096436	embryo development ending in seed dormancy [GO:0009793];polar nucleus fusion [GO:0010197]	cell wall [GO:0005618];extracellular region [GO:0005576];plasmodesma [GO:0009506]	cinnamyl-alcohol dehydrogenase activity [GO:0045551];coniferyl-alcohol dehydrogenase activity [GO:0050268];FAD binding [GO:0071949];sinapyl alcohol dehydrogenase activity [GO:0052747]	23	0	97.973	8468500000	164	19.7	22.7	17.5	14.8	O64743	O64743	1368	MEE23	Berberine bridge enzyme-like 15
294952220916748	29505651473999	29691722869873	295897979736328	response to jasmonic acid [GO:0009753];response to wounding [GO:0009611]	cell wall [GO:0005618];extracellular region [GO:0005576]	FAD binding [GO:0071949];oxidoreductase activity [GO:0016491]	28	0	65.878	14111000000	236	24.8	29.6	31.1	33	O64745	O64745	1369	At2g34810	Berberine bridge enzyme-like 16
283294563293457	28216646194458	283437995910645	285651092529297	defense response to fungus [GO:0050832];response to oomycetes [GO:0002239]	cell wall [GO:0005618]		19	0	94.03	3756900000	121	20.1	17.9	18	24	O64757	O64757	1370	At2g34930	Disease resistance family protein / LRR family protein
217297019958496	NaN	223444576263428	214804496765137		cytosol [GO:0005829];eukaryotic translation initiation factor 2B complex [GO:0005851]	guanyl-nucleotide exchange factor activity [GO:0005085];nucleotidyltransferase activity [GO:0016779];translation initiation factor activity [GO:0003743];translation initiation factor binding [GO:0031369]	24	0	96.425	4993600000	90	1.6	0	3	1.4	O64760	O64760	1371	At2g34970	At2g34970
278186054229736	280109462738037	277936477661133	277902336120605		cytosol [GO:0005829];endoplasmic reticulum [GO:0005783];mitochondrial matrix [GO:0005759];mitochondrion [GO:0005739]	oxidoreductase activity, acting on a sulfur group of donors, disulfide as acceptor [GO:0016671]	10	0	17.724	4859100000	113	30.9	30.9	36.6	38.1	O64764	O64764	1372	At2g35010	Thioredoxin O1, mitochondrial
266559467315674	268569755554199	267431678771973	261792678833008	embryo development ending in seed dormancy [GO:0009793];embryo sac development [GO:0009553];pollen development [GO:0009555];UDP-glucose metabolic process [GO:0006011];UDP-N-acetylgalactosamine metabolic process [GO:0019276];UDP-N-acetylglucosamine biosynthetic process [GO:0006048];UDP-N-acetylglucosamine metabolic process [GO:0006047]	cytoplasm [GO:0005737]	UDP-N-acetylgalactosamine diphosphorylase activity [GO:0052630];UDP-N-acetylglucosamine diphosphorylase activity [GO:0003977];uridylyltransferase activity [GO:0070569];UTP:glucose-1-phosphate uridylyltransferase activity [GO:0003983]	18	0	33.271	2169800000	42	27.7	30.1	28.3	23.5	O64765	O64765	1373	GLCNAC1PUT2	UDP-N-acetylglucosamine diphosphorylase 2
327091102600098	327121887207031	327151184082031	32587703704834	purine nucleotide biosynthetic process [GO:0006164]		IMP cyclohydrolase activity [GO:0003937];phosphoribosylaminoimidazolecarboxamide formyltransferase activity [GO:0004643]	56	0	323.31	102120000000	1128	85.7	85	85	83.9	O64767	O64767	1374	At2g35040	AICARFT/IMPCHase bienzyme family protein
271852741241455	26934045791626	270431213378906	264786472320557	signal transduction [GO:0007165]	cytoplasm [GO:0005737]	ATP binding [GO:0005524];protein kinase activity [GO:0004672];protein serine/threonine/tyrosine kinase activity [GO:0004712]	21	0	23.64	3452700000	88	8.4	11.5	9.2	8	O64768	O64768	1375	At2g35050	Kinase superfamily with octicosapeptide/Phox/Bem1p domain-containing protein
265196228027344	261812992095947	267858142852783	261532726287842	secondary metabolic process [GO:0019748]	extracellular region [GO:0005576]	serine-type carboxypeptidase activity [GO:0004185];transferase activity, transferring acyl groups other than amino-acyl groups [GO:0016747]	13	0	23.529	1723700000	25	10.8	15.1	12.8	13.5	O64810	O64810	1377	SCPL10	Serine carboxypeptidase-like 10
253311157226563	251288433074951	249083442687988	253574638366699	secondary metabolic process [GO:0019748]	extracellular region [GO:0005576]	serine-type carboxypeptidase activity [GO:0004185];sinapoylglucose-sinapoylglucose O-sinapoyltransferase activity [GO:0047158];transferase activity, transferring acyl groups other than amino-acyl groups [GO:0016747]	6	0	7.21	855400000	25	16.7	16.7	15.1	10.3	O64811	O64811	1378	SCPL9	Serine carboxypeptidase-like 9
246128482818604	244862804412842	NaN	24467248916626	cellular response to abscisic acid stimulus [GO:0071215];chloroplast-nucleus signaling pathway [GO:0010019];negative regulation of seed germination [GO:0010187];peptidyl-serine phosphorylation [GO:0018105];peptidyl-threonine phosphorylation [GO:0018107];regulation of cell cycle [GO:0051726];regulation of growth [GO:0040008];regulation of photoperiodism, flowering [GO:2000028]	chloroplast [GO:0009507];cytosol [GO:0005829];nucleus [GO:0005634];protein kinase CK2 complex [GO:0005956]	ATP binding [GO:0005524];kinase activity [GO:0016301];protein serine/threonine kinase activity [GO:0004674]	13	0	4.6855	660980000	15	9.7	12	10.4	16.4	O64816	O64816	1379	CKA4	Casein kinase II subunit alpha-4, chloroplastic
230758438110352	NaN	NaN	233252601623535				1	0.00019139	2.7833	120220000	4	2.7	0	0	2.7	O64856	O64856	1382	At2g44210	At2g44210/F4I1.2
236277847290039	240817222595215	236084003448486	234398708343506	lipid transport [GO:0006869]	anchored component of membrane [GO:0031225];cytosol [GO:0005829];integral component of membrane [GO:0016021];plasma membrane [GO:0005886]	lipid binding [GO:0008289]	1	0.002037	2.1922	188790000	14	5.4	5.4	5.4	5.4	O64865	O64865	1385	AtXYP10	At2g44300
248723468780518	246657905578613	25560079574585	25378288269043		cytosol [GO:0005829]	calcium ion binding [GO:0005509]	3	0	5.444	737190000	16	7.7	16.9	16.9	7	O64866	O64866	1386	At2g44310	Calcium-binding EF-hand family protein
288029804229736	287807865142822	285784511566162	284441509246826	carbohydrate metabolic process [GO:0005975];defense response by callose deposition in cell wall [GO:0052544];defense response to bacterium [GO:0042742];defense response to fungus, incompatible interaction [GO:0009817];glucosinolate catabolic process [GO:0019762];glucosinolate metabolic process [GO:0019760];indole glucosinolate catabolic process [GO:0042344];induced systemic resistance [GO:0009682…	chloroplast envelope [GO:0009941];membrane [GO:0016020];peroxisome [GO:0005777]	beta-glucosidase activity [GO:0008422];scopolin beta-glucosidase activity [GO:0102483];thioglucosidase activity [GO:0019137]	23	0	116.61	11732000000	176	24.3	16.2	25.2	21.8	O64883	O64883	1388	BGLU26	Beta-glucosidase 26, peroxisomal
237072505950928	247999591827393	231688423156738	NaN	5-phosphoribose 1-diphosphate biosynthetic process [GO:0006015];nucleoside metabolic process [GO:0009116];nucleotide biosynthetic process [GO:0009165];purine nucleotide biosynthetic process [GO:0006164];ribonucleoside monophosphate biosynthetic process [GO:0009156]	chloroplast [GO:0009507];cytoplasm [GO:0005737];plastid [GO:0009536];ribose phosphate diphosphokinase complex [GO:0002189]	ATP binding [GO:0005524];kinase activity [GO:0016301];magnesium ion binding [GO:0000287];ribose phosphate diphosphokinase activity [GO:0004749]	7	0	18.581	1357000000	36	2.8	5.8	2.8	0	O64888	O64888	1389	PRS5	Ribose-phosphate pyrophosphokinase 5, chloroplastic
327896270751953	327591896057129	328503761291504	327266731262207	auxin-activated signaling pathway [GO:0009734];CTP biosynthetic process [GO:0006241];GTP biosynthetic process [GO:0006183];purine nucleotide metabolic process [GO:0006163];pyrimidine nucleotide metabolic process [GO:0006220];red, far-red light phototransduction [GO:0009585];response to hydrogen peroxide [GO:0042542];response to UV [GO:0009411];UTP biosynthetic process [GO:0006228]	chloroplast [GO:0009507];chloroplast envelope [GO:0009941];chloroplast stroma [GO:0009570];cytoplasm [GO:0005737];nucleus [GO:0005634];plastid [GO:0009536];thylakoid [GO:0009579]	ATP binding [GO:0005524];metal ion binding [GO:0046872];nucleoside diphosphate kinase activity [GO:0004550]	23	0	226.03	73320000000	331	45	45	45	44.6	O64903	O64903	1390	NDPK2	Nucleoside diphosphate kinase II, chloroplastic
NaN	NaN	235731143951416	240857791900635	lateral root development [GO:0048527];protein import into peroxisome matrix, docking [GO:0016560];protein processing [GO:0016485];protein quality control for misfolded or incompletely synthesized proteins [GO:0006515];protein targeting to peroxisome [GO:0006625]	intracellular organelle lumen [GO:0070013];peroxisomal matrix [GO:0005782];peroxisome [GO:0005777]	ATP binding [GO:0005524];ATP-dependent peptidase activity [GO:0004176];serine-type endopeptidase activity [GO:0004252]	6	0	11.432	466350000	19	0	0	2.1	2.1	O64948	O64948	1391	LON2	Lon protease homolog 2, peroxisomal
299894256591797	299763717651367	298625431060791	29691873550415	protein modification by small protein conjugation [GO:0032446];protein neddylation [GO:0045116]	cytoplasm [GO:0005737];cytosol [GO:0005829];nucleus [GO:0005634]	ATP binding [GO:0005524];NEDD8 activating enzyme activity [GO:0019781];protein heterodimerization activity [GO:0046982]	32	0	136.56	22571000000	402	46.7	45.8	45.6	44.1	O65041	O65041	1392	ECR1	NEDD8-activating enzyme E1 catalytic subunit
261411590576172	270116939544678	262858791351318	252227306365967	fatty acid beta-oxidation [GO:0006635];fatty acid beta-oxidation using acyl-CoA oxidase [GO:0033540];lipid homeostasis [GO:0055088];long-chain fatty acid metabolic process [GO:0001676]	peroxisome [GO:0005777]	acyl-CoA oxidase activity [GO:0003997];FAD binding [GO:0071949];fatty acid binding [GO:0005504];flavin adenine dinucleotide binding [GO:0050660]	28	0	63.177	6144200000	92	16.9	12	15.8	7.2	O65201	O65201	1393	ACX2	Acyl-coenzyme A oxidase 2, peroxisomal
322810707092285	322862854003906	323206367492676	322397384643555	fatty acid beta-oxidation [GO:0006635];fatty acid beta-oxidation using acyl-CoA oxidase [GO:0033540];jasmonic acid biosynthetic process [GO:0009695];lipid homeostasis [GO:0055088];long-chain fatty acid metabolic process [GO:0001676];response to cadmium ion [GO:0046686];response to fungus [GO:0009620];response to wounding [GO:0009611]	cytosol [GO:0005829];peroxisome [GO:0005777];plasmodesma [GO:0009506]	acyl-CoA oxidase activity [GO:0003997];FAD binding [GO:0071949];fatty acid binding [GO:0005504];flavin adenine dinucleotide binding [GO:0050660]	48	0	323.31	60497000000	613	54.7	54.5	52	54.7	O65202	O65202	1394	ACX1	Peroxisomal acyl-coenzyme A oxidase 1
311398029327393	310421161651611	309906425476074	30903902053833	polysaccharide catabolic process [GO:0000272]	chloroplast [GO:0009507];chloroplast stroma [GO:0009570]	amylopectin maltohydrolase activity [GO:0102229];beta-amylase activity [GO:0016161]	33	0	323.31	22460000000	358	52.2	52.4	52.6	53.5	O65258	O65258	1395	BAM2	Beta-amylase 2, chloroplastic
301711673736572	301976528167725	301165676116943	3011110496521	one-carbon metabolic process [GO:0006730];photorespiration [GO:0009853];tetrahydrofolate interconversion [GO:0035999]	chloroplast [GO:0009507];cytosol [GO:0005829]	methenyltetrahydrofolate cyclohydrolase activity [GO:0004477];methylenetetrahydrofolate dehydrogenase (NADP+) activity [GO:0004488]	20	0	186.33	17985000000	308	62.8	62.8	45	54.2	O65271	O65271	1396	FOLD4	Bifunctional protein FolD 4, chloroplastic
34099536895752	34228199005127	340418090820313	340107192993164	chaperone cofactor-dependent protein refolding [GO:0051085];negative regulation of abscisic acid-activated signaling pathway [GO:0009788];positive regulation of superoxide dismutase activity [GO:1901671];protein heterotetramerization [GO:0051290];response to cadmium ion [GO:0046686];response to cold [GO:0009409]	apoplast [GO:0048046];chloroplast [GO:0009507];chloroplast envelope [GO:0009941];chloroplast stroma [GO:0009570];chloroplast thylakoid membrane [GO:0009535];mitochondrial matrix [GO:0005759];mitochondrion [GO:0005739];plastid [GO:0009536];thylakoid [GO:0009579]	ATP binding [GO:0005524];chaperone binding [GO:0051087];copper ion binding [GO:0005507];metal ion binding [GO:0046872];unfolded protein binding [GO:0051082]	42	0	323.31	224680000000	927	73.1	73.1	73.1	73.1	O65282;REV__Q9C7N2	O65282	1397	CPN20	20 kDa chaperonin, chloroplastic
314432716369629	314382724761963	315457725524902	315636558532715	mucilage extrusion from seed coat [GO:0080001];mucilage metabolic process involved in seed coat development [GO:0048359];seed coat development [GO:0010214]	apoplast [GO:0048046];cell wall [GO:0005618];extracellular region [GO:0005576];secretory vesicle [GO:0099503]	serine-type endopeptidase activity [GO:0004252]	31	0	323.31	68497000000	599	44.4	43.5	44.4	42.8	O65351	O65351	1398	SBT1.7	Subtilisin-like protease SBT1.7
29031364440918	294529914855957	297339401245117	295918140411377	cellular response to fatty acid [GO:0071398];defense response [GO:0006952];ethylene biosynthetic process [GO:0009693]	cytosol [GO:0005829]	1-aminocyclopropane-1-carboxylate oxidase activity [GO:0009815];dioxygenase activity [GO:0051213];L-ascorbic acid binding [GO:0031418];metal ion binding [GO:0046872]	5	0	214.63	11866000000	53	9.7	12.2	12.2	12.2	O65378	O65378	1401	At1g12010	1-aminocyclopropane-1-carboxylate oxidase 3
336069755554199	335419006347656	334666023254395	333675003051758	methylglyoxal catabolic process to D-lactate via S-lactoyl-glutathione [GO:0019243];response to cadmium ion [GO:0046686]	chloroplast envelope [GO:0009941];cytoplasm [GO:0005737];cytosol [GO:0005829];extracellular region [GO:0005576];peroxisome [GO:0005777];plasma membrane [GO:0005886];secretory vesicle [GO:0099503];vacuole [GO:0005773]	dioxygenase activity [GO:0051213];lactoylglutathione lyase activity [GO:0004462];metal ion binding [GO:0046872]	37	0	323.31	300640000000	902	67.1	65	62.9	62.5	O65398	O65398	1402	GLX1	Lactoylglutathione lyase GLX1
272484378814697	272512397766113	272830371856689	273375606536865	carbohydrate metabolic process [GO:0005975];defense response [GO:0006952]	anchored component of plasma membrane [GO:0046658];extracellular region [GO:0005576]	glucan endo-1,3-beta-D-glucosidase activity [GO:0042973]	5	0	22.013	2320600000	32	11.2	7.6	7.6	7.6	O65399	O65399	1403	At1g11820	Glucan endo-1,3-beta-glucosidase 1
267297477722168	NaN	274365062713623	NaN	anaphase-promoting complex-dependent catabolic process [GO:0031145];cell cycle [GO:0007049];cell division [GO:0051301];embryo development ending in seed dormancy [GO:0009793];plant ovule development [GO:0048481];positive regulation of mitotic metaphase/anaphase transition [GO:0045842];protein K11-linked ubiquitination [GO:0070979]	anaphase-promoting complex [GO:0005680];nuclear periphery [GO:0034399];nucleus [GO:0005634]		3	0	6.2402	1290300000	9	1.2	0	1.2	0	O65418	O65418	1404	APC4	Anaphase-promoting complex subunit 4
315313892364502	314766292572021	314962902069092	314948596954346		cytosol [GO:0005829]	oxidoreductase activity [GO:0016491]	27	0	316.76	66288000000	500	63.4	63.1	71.1	68.3	O65423	O65423	1406	F18E5.200	AT4g21580/F18E5_200
287824420928955	28949239730835	287745780944824	289306659698486	iron ion homeostasis [GO:0055072];iron ion transport [GO:0006826]	plasma membrane [GO:0005886];plasmodesma [GO:0009506]	copper ion binding [GO:0005507];ferroxidase activity [GO:0004322]	13	0	71.558	10628000000	144	26.2	26.2	25.7	22.2	O65449	O65449	1408	sks4	At4g22010
300419216156006	301357727050781	301924877166748	300562076568604	programmed cell death [GO:0012501];response to salicylic acid [GO:0009751];systemic acquired resistance [GO:0009627]	apoplast [GO:0048046];secretory vesicle [GO:0099503]		7	0	169.8	18520000000	82	36.2	32.8	28.3	32.8	O65469	O65469	1409	CRK9	Putative cysteine-rich receptor-like protein kinase 9
2462282371521	250320835113525	246229343414307	253205165863037	programmed cell death involved in cell development [GO:0010623];proteolysis involved in cellular protein catabolic process [GO:0051603]	extracellular space [GO:0005615];lysosome [GO:0005764];nucleus [GO:0005634];plant-type vacuole [GO:0000325];plasma membrane [GO:0005886]	cysteine-type endopeptidase activity [GO:0004197]	7	0	33.144	1959500000	29	4.5	6.8	4.5	3.9	O65493	O65493	1410	XCP1	Cysteine protease XCP1
28335262298584	278386993408203	284759140014648	260888557434082	photosystem II assembly [GO:0010207]	chloroplast [GO:0009507];chloroplast stroma [GO:0009570];chloroplast thylakoid [GO:0009534];chloroplast thylakoid membrane [GO:0009535];photosystem II [GO:0009523];plasma membrane [GO:0005886];thylakoid membrane [GO:0042651]	translation initiation factor activity [GO:0003743]	4	0	7.49	6537000000	11	8.9	8.9	6.6	8.9	O65502	O65502	1411	HCF244	Protein HIGH CHLOROPHYLL FLUORESCENCE PHENOTYPE 244, chloroplastic
264538593292236	272860374450684	255709743499756	258309135437012	signal transduction [GO:0007165]	integral component of membrane [GO:0016021]	ADP binding [GO:0043531]	2	0.0062724	1.6946	5801800000	11	1.4	1.4	1.4	1.4	O65507	O65507	1412	At4g36150	Disease resistance protein (TIR-NBS-LRR class) family
319003067016602	318730201721191	320257797241211	320203247070313	actin filament capping [GO:0051693];actin filament depolymerization [GO:0030042];actin filament organization [GO:0007015];actin filament severing [GO:0051014];actin polymerization or depolymerization [GO:0008154];cytoplasmic streaming [GO:0099636];response to abscisic acid [GO:0009737];root hair elongation [GO:0048767]	actin cytoskeleton [GO:0015629];cytoplasm [GO:0005737];cytosol [GO:0005829];plasma membrane [GO:0005886]	actin filament binding [GO:0051015]	87	0	323.31	87399000000	1043	58.8	50.9	58.4	54.1	O65570	O65570	1414	VLN4	Villin-4
340716781616211	341704216003418	340805206298828	340279541015625	fructose 1,6-bisphosphate metabolic process [GO:0030388];gluconeogenesis [GO:0006094];glycolytic process [GO:0006096]	cytosol [GO:0005829]	fructose-bisphosphate aldolase activity [GO:0004332]	49	0	323.31	281010000000	1159	89.7	85.5	88.3	85.5	O65581	O65581	1416	FBA5	Fructose-bisphosphate aldolase 5, cytosolic
295419101715088	295668506622314	296763191223145	297095642089844	cold acclimation [GO:0009631];DNA duplex unwinding [GO:0032508];response to cold [GO:0009409];response to salt stress [GO:0009651];response to water deprivation [GO:0009414];RNA secondary structure unwinding [GO:0010501]	cytoplasm [GO:0005737];nucleus [GO:0005634];plasma membrane [GO:0005886]	double-stranded DNA binding [GO:0003690];mRNA binding [GO:0003729];nucleic acid binding [GO:0003676];RNA binding [GO:0003723];single-stranded DNA binding [GO:0003697];zinc ion binding [GO:0008270]	20	0	323.31	27517000000	353	67.2	58.2	67.2	58.2	O65639;A0A1P8B8F3	O65639	1420	CSP1;CSDP1	Cold shock protein 1;Cold shock domain protein 1
24864574432373	248027229309082	NaN	NaN	regulation of growth [GO:0040008];response to cold [GO:0009409];response to salt stress [GO:0009651];response to water deprivation [GO:0009414]	chloroplast thylakoid membrane [GO:0009535];endoplasmic reticulum [GO:0005783];plasma membrane [GO:0005886];plastoglobule [GO:0010287];secretory vesicle [GO:0099503];thylakoid [GO:0009579];vacuolar membrane [GO:0005774];vacuole [GO:0005773]	catalase activity [GO:0004096];heme binding [GO:0020037]	6	0	114.14	22127000000	54	8.8	8.8	0	0	O65660	O65660	1422	PLAT1	PLAT domain-containing protein 1
266872577667236	262151012420654	261275062561035	262394332885742	positive regulation of leaf senescence [GO:1900057];response to hydroperoxide [GO:0033194]		pinoresinol reductase activity [GO:0010283]	9	0	11.361	2225100000	38	14.7	11.4	22.9	17	O65679	O65679	1423	PLR3	Probable pinoresinol-lariciresinol reductase 3
246248321533203	NaN	244819774627686	NaN	ribosome biogenesis [GO:0042254];rRNA processing [GO:0006364]	chloroplast [GO:0009507]	ribosomal small subunit binding [GO:0043024]	3	0.00019223	2.8374	316000000	19	7.4	4.2	4.2	0	O65693	O65693	1424	At4g34730	Probable ribosome-binding factor A, chloroplastic
343096618652344	342438850402832	342831993103027	342820930480957	cellular response to unfolded protein [GO:0034620];chaperone cofactor-dependent protein refolding [GO:0051085];protein refolding [GO:0042026];response to cadmium ion [GO:0046686];response to heat [GO:0009408];response to karrikin [GO:0080167];response to unfolded protein [GO:0006986];response to virus [GO:0009615]	apoplast [GO:0048046];cell wall [GO:0005618];chloroplast [GO:0009507];cytoplasm [GO:0005737];cytosol [GO:0005829];cytosolic ribosome [GO:0022626];Golgi apparatus [GO:0005794];nuclear matrix [GO:0016363];plasma membrane [GO:0005886];plasmodesma [GO:0009506];vacuolar membrane [GO:0005774];vacuole [GO:0005773]	ATP binding [GO:0005524];ATPase activity [GO:0016887];heat shock protein binding [GO:0031072];misfolded protein binding [GO:0051787];protease binding [GO:0002020];protein folding chaperone [GO:0044183];unfolded protein binding [GO:0051082]	85	0	323.31	426670000000	1322	81.8	81.8	77.3	77.3	O65719	O65719	1425	HSP70-3	Heat shock 70 kDa protein 3
286548194885254	287986621856689	288671760559082	289080181121826	cytidine catabolic process [GO:0006216];cytidine deamination [GO:0009972]	cytosol [GO:0005829];mitochondrion [GO:0005739]	cytidine deaminase activity [GO:0004126];deoxycytidine deaminase activity [GO:0047844];protein homodimerization activity [GO:0042803];zinc ion binding [GO:0008270]	23	0	285.25	16479000000	222	31.6	37.9	45.2	38.2	O65896	O65896	1426	CDA1	Cytidine deaminase 1
317660789489746	317694320678711	316865386962891	316425476074219	actin cytoskeleton organization [GO:0030036];actin polymerization or depolymerization [GO:0008154];cell morphogenesis [GO:0000902];establishment or maintenance of cell polarity [GO:0007163];regulation of adenylate cyclase activity [GO:0045761];unidimensional cell growth [GO:0009826]	cortical actin cytoskeleton [GO:0030864];cytosol [GO:0005829]	actin binding [GO:0003779];adenylate cyclase binding [GO:0008179]	64	0	323.31	106070000000	802	71	67.4	82.6	78.2	O65902	O65902	1427	CAP1	Cyclase-associated protein 1
343025283813477	344666023254395	342374153137207	343508720397949	cellular response to light intensity [GO:0071484];cellular response to oxidative stress [GO:0034599];cellular response to ozone [GO:0071457];cellular response to salt stress [GO:0071472];cellular response to sucrose stimulus [GO:0071329];cellular response to UV-B [GO:0071493];gene silencing by miRNA [GO:0035195];removal of superoxide radicals [GO:0019430];response to copper ion [GO:0046688];respo…	apoplast [GO:0048046];chloroplast [GO:0009507];chloroplast stroma [GO:0009570];extracellular region [GO:0005576];extracellular space [GO:0005615];thylakoid [GO:0009579]	copper ion binding [GO:0005507];superoxide dismutase activity [GO:0004784]	11	0	323.31	262540000000	532	69.9	69.9	69.9	69.9	O78310	O78310	1428	CSD2	Superoxide dismutase [Cu-Zn] 2, chloroplastic
262026767730713	263040676116943	268157997131348	265688896179199	cell cycle [GO:0007049];cell division [GO:0051301];maintenance of root meristem identity [GO:0010078];positive regulation of transcription by RNA polymerase II [GO:0045944];protein phosphorylation [GO:0006468];regulation of cyclin-dependent protein serine/threonine kinase activity [GO:0000079]	cytoplasm [GO:0005737];cytosol [GO:0005829];nucleus [GO:0005634];transcription factor TFIIK complex [GO:0070985]	ATP binding [GO:0005524];cyclin-dependent protein serine/threonine kinase activity [GO:0004693];protein serine/threonine kinase activity [GO:0004674];RNA polymerase II CTD heptapeptide repeat kinase activity [GO:0008353]	10	0	35.888	2718800000	65	5.6	6.1	3.5	5.4	O80345	O80345	1429	CDKF-1	Cyclin-dependent kinase F-1
267750492095947	277001495361328	270474967956543	267449645996094	anthocyanin-containing compound biosynthetic process [GO:0009718];chlorophyll biosynthetic process [GO:0015995];positive regulation of transcription, DNA-templated [GO:0045893];response to light stimulus [GO:0009416]	nucleus [GO:0005634];plasma membrane [GO:0005886]		10	0	14.275	2750300000	25	2.5	4.3	4.3	3.5	O80386	O80386	1430	CIP7	COP1-interacting protein 7
318395862579346	316211738586426	318670654296875	319056243896484	cellular amino acid metabolic process [GO:0006520];pyridoxal phosphate biosynthetic process [GO:0042823];pyridoxine biosynthetic process [GO:0008615]	chloroplast [GO:0009507];cytosol [GO:0005829];endoplasmic reticulum [GO:0005783]	amine-lyase activity [GO:0016843];protein heterodimerization activity [GO:0046982];pyridoxal 5'-phosphate synthase (glutamine hydrolysing) activity [GO:0036381]	26	0	323.31	66061000000	394	53.4	51.5	48.9	49.5	O80448	O80448	1433	PDX11	Pyridoxal 5'-phosphate synthase subunit PDX1.1
273221683502197	289773006439209	285091114044189	290970039367676	flavonoid biosynthetic process [GO:0009813];regulation of jasmonic acid mediated signaling pathway [GO:2000022]	cytosol [GO:0005829]	dioxygenase activity [GO:0051213];jasmonic acid hydrolase [GO:0120091];metal ion binding [GO:0046872]	10	0	43.586	1556900000	27	30.3	27.2	33.7	30.6	O80449	O80449	1434	ANS	Probable 2-oxoglutarate-dependent dioxygenase ANS
239281387329102	237894496917725	239192523956299	NaN				2	0.0014886	2.293	216520000	7	2.1	2.1	2.1	0	O80456	O80456	1436	At2g23390	Acyl-CoA
256520938873291	252132301330566	250563106536865	251081714630127	defense response to fungus, incompatible interaction [GO:0009817];jasmonic acid metabolic process [GO:0009694];salicylic acid metabolic process [GO:0009696];systemic acquired resistance [GO:0009627]		hydrolase activity [GO:0016787];hydrolase activity, acting on ester bonds [GO:0016788];methyl indole-3-acetate esterase activity [GO:0080030];methyl jasmonate esterase activity [GO:0080032];methyl salicylate esterase activity [GO:0080031]	6	0	22.502	604220000	9	3.1	5.8	16.2	13.5	O80472	O80472	1438	MES7	Methylesterase 7
322897796630859	324586563110352	323375625610352	32290355682373	jasmonic acid metabolic process [GO:0009694];nicotinate metabolic process [GO:1901847];salicylic acid metabolic process [GO:0009696]	cytosol [GO:0005829];vacuole [GO:0005773]	carboxylic ester hydrolase activity [GO:0052689];hydrolase activity [GO:0016787];hydrolase activity, acting on ester bonds [GO:0016788];methyl indole-3-acetate esterase activity [GO:0080030];methyl jasmonate esterase activity [GO:0080032];methyl salicylate esterase activity [GO:0080031]	20	0	323.31	82399000000	470	70	66.5	68.4	58.2	O80476	O80476	1440	MES2	Methylesterase 2
292887020111084	293802623748779	292703266143799	294306564331055	jasmonic acid metabolic process [GO:0009694];salicylic acid metabolic process [GO:0009696]	vacuole [GO:0005773]	hydrolase activity [GO:0016787];hydrolase activity, acting on ester bonds [GO:0016788];methyl indole-3-acetate esterase activity [GO:0080030];methyl jasmonate esterase activity [GO:0080032];methyl salicylate esterase activity [GO:0080031]	16	0	88.513	11764000000	182	39.2	41.4	44.9	44.9	O80477	O80477	1441	MES3	Methylesterase 3
293897495269775	294202919006348	294979076385498	296695251464844	host response to induction by symbiont of tumor, nodule or growth in host [GO:0080034];NLS-bearing protein import into nucleus [GO:0006607];symbiont intracellular protein transport in host [GO:0030581]	cytosol [GO:0005829];host cell nucleus [GO:0042025];nuclear envelope [GO:0005635];nucleus [GO:0005634]	nuclear import signal receptor activity [GO:0061608];nuclear localization sequence binding [GO:0008139]	34	0	323.31	23627000000	288	46.8	41.3	41.6	40.5	O80480	O80480	1442	IMPA4	Importin subunit alpha-4
244633865356445	232525157928467	217082195281982	NaN		plasma membrane [GO:0005886]	magnesium-dependent protein serine/threonine phosphatase activity [GO:0004724];metal ion binding [GO:0046872];protein serine/threonine phosphatase activity [GO:0004722]	4	0	28.06	227600000	8	4.7	7.2	2.3	1.9	O80492	O80492	1443	At1g09160	Probable protein phosphatase 2C 5
264415969848633	264756832122803	267259845733643	241449928283691	exocytosis [GO:0006887];intracellular protein transport [GO:0006886];intra-Golgi vesicle-mediated transport [GO:0006891];plant-type cell wall cellulose biosynthetic process [GO:0052324];Rab protein signal transduction [GO:0032482];regulation of cell growth [GO:0001558];retrograde transport, endosome to Golgi [GO:0042147];retrograde vesicle-mediated transport, Golgi to endoplasmic reticulum [GO:00…	cytosol [GO:0005829];endomembrane system [GO:0012505];endosome [GO:0005768];Golgi apparatus [GO:0005794];Golgi membrane [GO:0000139];membrane [GO:0016020];plasma membrane [GO:0005886];plasmodesma [GO:0009506];trans-Golgi network [GO:0005802];vacuolar membrane [GO:0005774]	GTP binding [GO:0005525];GTPase activity [GO:0003924]	6	0	19.962	2578300000	38	11.1	11.1	5.3	11.1	O80501	O80501	1444	RABH1B	Ras-related protein RABH1b
310148487091064	308165016174316	307401313781738	306645832061768	chaperone cofactor-dependent protein refolding [GO:0051085];protein folding [GO:0006457]	chloroplast [GO:0009507];chloroplast envelope [GO:0009941];chloroplast stroma [GO:0009570];cytosol [GO:0005829];mitochondrial matrix [GO:0005759];plastid [GO:0009536]	chaperone binding [GO:0051087];metal ion binding [GO:0046872];protein domain specific binding [GO:0019904];unfolded protein binding [GO:0051082]	13	0	323.31	22697000000	166	66.9	66.9	66.9	66.9	O80504	O80504	1445	CPN10-2	10 kDa chaperonin 2, chloroplastic
305955715179443	303397922515869	304738273620605	305271053314209		anchored component of membrane [GO:0031225];anchored component of plasma membrane [GO:0046658];plasmodesma [GO:0009506]	electron transfer activity [GO:0009055];metal ion binding [GO:0046872]	9	0	258.88	33228000000	151	30.2	30.2	30.2	30.2	O80517	O80517	1447	At2g44790	Uclacyanin-2
257202548980713	252216243743896	255581531524658	256542797088623	lipid catabolic process [GO:0016042]	chloroplast stroma [GO:0009570];extracellular region [GO:0005576]	hydrolase activity, acting on ester bonds [GO:0016788]	8	0	13.602	1035400000	25	10.5	13.8	14.6	11.4	O80522	O80522	1448	At1g09390	GDSL esterase/lipase At1g09390
307570037841797	306656856536865	307032222747803	307398090362549	acetyl-CoA biosynthetic process [GO:0006085];lipid metabolic process [GO:0006629]	citrate lyase complex [GO:0009346];cytosol [GO:0005829];extracellular region [GO:0005576]	ATP binding [GO:0005524];ATP citrate synthase activity [GO:0003878]	37	0	323.31	49422000000	523	62.3	56.4	56.4	48.8	O80526	O80526	1449	ACLA-3	ATP-citrate synthase alpha chain protein 3
29055793762207	289796199798584	288971214294434	284919776916504		secretory vesicle [GO:0099503]	alcohol dehydrogenase (NAD+) activity [GO:0004022];oxidoreductase activity [GO:0016491];oxidoreductase activity, acting on the CH-OH group of donors, NAD or NADP as acceptor [GO:0016616]	16	0	74.708	8303500000	122	30.4	30.4	33.5	26.7	O80532;Q5PP57	O80532	1450	At1g09490	At1g09490/F14J9_15
260751667022705	263729515075684	258038558959961	259283180236816			alcohol dehydrogenase (NAD+) activity [GO:0004022];oxidoreductase activity [GO:0016491];oxidoreductase activity, acting on the CH-OH group of donors, NAD or NADP as acceptor [GO:0016616]	5	0	4.7664	510090000	20	10.5	12.6	12.6	9.2	O80533	O80533	1451	At1g09500	At1g09500/F14J9_16
245829639434814	244046401977539	245950832366943	NaN	methylation [GO:0032259]	mitochondrion [GO:0005739]	methyltransferase activity [GO:0008168]	5	0	6.7843	846070000	25	2.3	5.4	9.9	0	O80543	O80543	1452	At1g22800	Putative methyltransferase At1g22800, mitochondrial
271582698822021	258354740142822	NaN	29640962600708	negative regulation of transcription, DNA-templated [GO:0045892];regulation of translation [GO:0006417];response to absence of light [GO:0009646];response to carbon starvation [GO:0090549]	cytosol [GO:0005829];nucleus [GO:0005634]	ribosome binding [GO:0043022]	9	0	7.3512	5024300000	25	4	1.4	0	2.5	O80548	O80548	1453	MRF2	MA3 DOMAIN-CONTAINING TRANSLATION REGULATORY FACTOR 2
25197717666626	252309589385986	25376070022583	NaN	methylation [GO:0032259]	cytosol [GO:0005829]	thiol S-methyltransferase activity [GO:0018708]	4	0	6.8148	662670000	24	9.7	9.7	9.7	7.9	O80562	O80562	1454	HOL2	Probable thiol methyltransferase 1
25747631072998	264536094665527	247347965240479	241835899353027	RNA processing [GO:0006396]	nucleus [GO:0005634];ribonucleoprotein complex [GO:1990904]	mRNA binding [GO:0003729]	14	0	31.021	4260600000	59	7.7	7.7	3.3	4.4	O80567	O80567	1455	LARP6B	La-related protein 6B
259207305908203	254255352020264	262283935546875	257783622741699	inositol trisphosphate metabolic process [GO:0032957];myo-inositol hexakisphosphate biosynthetic process [GO:0010264]	cytosol [GO:0005829]	ATP binding [GO:0005524];inositol tetrakisphosphate 1-kinase activity [GO:0047325];inositol-1,3,4-trisphosphate 5-kinase activity [GO:0052726];inositol-1,3,4-trisphosphate 6-kinase activity [GO:0052725];magnesium ion binding [GO:0000287]	14	0	53.717	2922000000	53	13.5	5.9	7.8	7	O80568	O80568	1456	ITPK4	Inositol 1,3,4-trisphosphate 5/6-kinase 4
308709278106689	309910488128662	308423614501953	308737163543701	diaminopimelate biosynthetic process [GO:0019877];lysine biosynthetic process via diaminopimelate [GO:0009089]	chloroplast [GO:0009507];chloroplast stroma [GO:0009570];cytosol [GO:0005829]	4-hydroxy-tetrahydrodipicolinate reductase [GO:0008839];NADPH binding [GO:0070402]	19	0	258.41	25912000000	222	51.6	52.7	64	57.6	O80574	O80574	1457	DAPB1	4-hydroxy-tetrahydrodipicolinate reductase 1, chloroplastic
270874996185303	274133682250977	26974760055542	26908618927002	riboflavin biosynthetic process [GO:0009231]	chloroplast [GO:0009507];chloroplast stroma [GO:0009570];riboflavin synthase complex [GO:0009349]	6,7-dimethyl-8-ribityllumazine synthase activity [GO:0000906]	7	0	36.357	4081800000	87	23.3	20.3	23.3	18.5	O80575	O80575	1458	At2g44050	6,7-dimethyl-8-ribityllumazine synthase, chloroplastic
200247230529785	249275512695313	250067157745361	247419090270996	response to cadmium ion [GO:0046686];response to desiccation [GO:0009269]	cytosol [GO:0005829];Golgi apparatus [GO:0005794];plasma membrane [GO:0005886];plasmodesma [GO:0009506]		42	0	323.31	77352000000	362	26.2	18.8	2.2	6.8	O80576	O80576	1459	late embryogenesis abundant 26	At2g44060
322191352844238	321902809143066	322306900024414	322056846618652	methionine biosynthetic process [GO:0009086];one-carbon metabolic process [GO:0006730];tetrahydrofolate interconversion [GO:0035999]	cytosol [GO:0005829]	FAD binding [GO:0071949];methylenetetrahydrofolate reductase (NAD(P)H) activity [GO:0004489]	59	0	323.31	126060000000	1024	85.4	76.6	82.3	76.3	O80585	O80585	1460	MTHFR2	Methylenetetrahydrofolate reductase 2
NaN	NaN	214206485748291	229386196136475	mRNA splicing, via spliceosome [GO:0000398];positive regulation of transcription, DNA-templated [GO:0045893];regulation of circadian rhythm [GO:0042752];regulation of photoperiodism, flowering [GO:2000028];response to abscisic acid [GO:0009737];response to mannitol [GO:0010555];response to salt stress [GO:0009651];rhythmic process [GO:0048511];RNA splicing [GO:0008380];vegetative to reproductive …	mitochondrion [GO:0005739];nuclear speck [GO:0016607];nucleolus [GO:0005730];nucleus [GO:0005634];spliceosomal complex [GO:0005681]	pre-mRNA binding [GO:0036002]	10	0	24.575	1555300000	39	0	0	1.6	1.8	O80653	O80653	1464	SKIP	SNW/SKI-interacting protein
32252254486084	323553161621094	319165573120117	318534088134766	carbohydrate metabolic process [GO:0005975];lignin biosynthetic process [GO:0009809]		beta-glucosidase activity [GO:0008422];coniferin beta-glucosidase activity [GO:0047782];scopolin beta-glucosidase activity [GO:0102483]	39	0	323.31	17436000000	167	64.5	60.7	61	64.5	O80690	O80690	1467	BGLU46	Beta-glucosidase 46
281567287445068	277489356994629	28179162979126	27298677444458	defense response to bacterium [GO:0042742];plant-type hypersensitive response [GO:0009626]		oxidoreductase activity [GO:0016491]	18	0	82.607	15653000000	171	32.3	26.5	34.6	26.1	O80713	O80713	1469	SDR3a	Short-chain dehydrogenase reductase 3a
291802310943604	292156982421875	290690727233887	291931457519531	cell wall organization [GO:0071555]	extracellular region [GO:0005576];plant-type cell wall [GO:0009505]	carboxylic ester hydrolase activity [GO:0052689];pectin acetylesterase activity [GO:0052793]	22	0	285.02	12753000000	257	52.2	57.2	47.4	43.3	O80731	O80731	1471	PAE3	Pectin acetylesterase 3
248618793487549	238088226318359	218829708099365	248980445861816		cytosol [GO:0005829]		16	0	39.305	2638900000	81	7.5	5.1	6.5	6.4	O80734	O80734	1472	At2g46900	Expressed protein
248346557617188	261646900177002	252355690002441	255768089294434			carbohydrate binding [GO:0030246]	3	0.0084881	1.5389	882000000	9	2.3	2.3	2.3	2.3	O80735	O80735	1473	JAL16	Jacalin-related lectin 16
26563720703125	263593921661377	264659729003906	267910404205322	dephosphorylation [GO:0016311]	cytoplasm [GO:0005737];cytosol [GO:0005829]	transferase activity, transferring glycosyl groups [GO:0016757]	21	0	86.786	2471900000	45	2.2	4.6	2.2	2.2	O80738	O80738	1474	TPS10	Probable alpha,alpha-trehalose-phosphate synthase [UDP-forming] 10
308898315429688	30989221572876	309946269989014	310882205963135	cell redox homeostasis [GO:0045454];pollen tube growth [GO:0009860];pollen tube guidance [GO:0010183];regulation of pollen tube growth [GO:0080092];response to cadmium ion [GO:0046686]	cytosol [GO:0005829];nucleus [GO:0005634]	protein-disulfide reductase activity [GO:0047134]	56	0	323.31	58835000000	746	55.5	54	55.9	53.5	O80763	O80763	1475	At1g60420	Probable nucleoredoxin 1
NaN	241606178283691	241813163757324	247006530761719	oxidation-reduction process [GO:0055114]	cytosol [GO:0005829];mitochondrial matrix [GO:0005759];mitochondrion [GO:0005739];nucleus [GO:0005634];respirasome [GO:0070469]	acyl binding [GO:0000035];acyl carrier activity [GO:0000036];cobalt ion binding [GO:0050897];metal ion binding [GO:0046872]	2	0	5.5189	437620000	11	0	14.3	14.3	14.3	O80800	O80800	1478	MTACP2	Acyl carrier protein 2, mitochondrial
257869358062744	255228290557861	259244956970215	255779609680176	double fertilization forming a zygote and endosperm [GO:0009567]	cytoplasm [GO:0005737];nucleus [GO:0005634]	transferase activity, transferring acyl groups other than amino-acyl groups [GO:0016747]	12	0	12.226	1219200000	47	12.2	9.1	11.6	7.1	O80816	O80816	1479	GLAUCE	HXXXD-type acyl-transferase family protein
2535302734375	253465156555176	254865570068359	252976455688477		nucleus [GO:0005634]	AT DNA binding [GO:0003680]	3	0	24.407	1106000000	17	12.4	12.4	12.4	12.4	O80834	O80834	1480	AHL9	AT-hook motif nuclear-localized protein 9
317180423736572	318150520324707	317621231079102	317961807250977	GDP-mannose biosynthetic process [GO:0009298];L-ascorbic acid biosynthetic process [GO:0019853];mannose metabolic process [GO:0006013];protein N-linked glycosylation [GO:0006487];protein targeting to ER [GO:0045047]	cytosol [GO:0005829]	phosphomannomutase activity [GO:0004615]	32	0	323.31	72066000000	616	78	76.4	77.6	78	O80840	O80840	1481	PMM	Phosphomannomutase
288512954711914	301630306243896	302753086090088	299919948577881	SRP-dependent cotranslational protein targeting to membrane [GO:0006614]	chloroplast stroma [GO:0009570];chloroplast thylakoid membrane [GO:0009535]	GTP binding [GO:0005525];metal ion binding [GO:0046872]	22	0	150.93	17841000000	208	53.8	46.7	49.7	49.7	O80842	O80842	1482	CPFTSY	Cell division protein FtsY homolog, chloroplastic
222793197631836	229995174407959	236957244873047	245286827087402	tRNA methylation [GO:0030488]	nucleus [GO:0005634];tRNA (m1A) methyltransferase complex [GO:0031515]	translation initiation factor activity [GO:0003743]	16	0	100.3	4415000000	62	3.6	5.2	10.1	11.2	O80846	O80846	1483	At2g45730	tRNA (adenine(58)-N(1))-methyltransferase non-catalytic subunit TRM6
34359733581543	343494873046875	344114761352539	343531074523926	defense response [GO:0006952];defense response to bacterium [GO:0042742];glutathione metabolic process [GO:0006749];response to cadmium ion [GO:0046686];response to zinc ion [GO:0010043];toxin catabolic process [GO:0009407]	apoplast [GO:0048046];chloroplast [GO:0009507];chloroplast stroma [GO:0009570];cytoplasm [GO:0005737];cytosol [GO:0005829];peroxisome [GO:0005777];plasma membrane [GO:0005886];plasmodesma [GO:0009506];thylakoid [GO:0009579];vacuole [GO:0005773]	copper ion binding [GO:0005507];glutathione binding [GO:0043295];glutathione peroxidase activity [GO:0004602];glutathione transferase activity [GO:0004364]	35	0	323.31	399280000000	964	80	65.1	80	80	O80852	O80852	1484	GSTF9	Glutathione S-transferase F9
237383041381836	231334056854248	219168872833252	NaN		chloroplast [GO:0009507];peroxisome [GO:0005777];plasma membrane [GO:0005886]		10	0	202.44	3279900000	45	5.5	12.2	5.5	0	O80858	O80858	1485	At2g30930	Expressed protein
289195709228516	286732711791992	292260971069336	290123329162598	response to zinc ion [GO:0010043]	chloroplast [GO:0009507];cytosol [GO:0005829];endoplasmic reticulum [GO:0005783]	hydrolase activity [GO:0016787];transferase activity, transferring acyl groups other than amino-acyl groups [GO:0016747]	18	0	72.341	9237300000	134	46.4	31	45.6	55.6	O80889;A0A1P8AZM5	O80889	1486	At2g32520	Alpha/beta-Hydrolases superfamily protein
27057653427124	269757442474365	270358009338379	269899940490723	spliceosomal complex assembly [GO:0000245]	catalytic step 2 spliceosome [GO:0071013];U2 snRNP [GO:0005686];U2-type prespliceosome [GO:0071004]	nucleic acid binding [GO:0003676];zinc ion binding [GO:0008270]	12	0	76.852	3345800000	73	19.9	19.9	12.6	24.2	O80897	O80897	1487	At2g32600	At2g32600/T26B15.16
282064361572266	288609447479248	28894868850708	306287975311279	signal transduction [GO:0007165]		ATP binding [GO:0005524];protein serine/threonine kinase activity [GO:0004674]	2	0.007276	1.5743	12588000000	23	2.1	2.1	2.1	4.2	O80902	O80902	1488	CIPK22	CBL-interacting serine/threonine-protein kinase 22
276687812805176	27746696472168	278199462890625	280010986328125	protein transport to vacuole involved in ubiquitin-dependent protein catabolic process via the multivesicular body sorting pathway [GO:0043328]	cytoplasm [GO:0005737];early endosome [GO:0005769];early endosome membrane [GO:0031901];multivesicular body [GO:0005771];plasma membrane [GO:0005886]	ubiquitin binding [GO:0043130]	10	0	90.949	3882400000	90	15.2	15.2	15.4	11.6	O80910	O80910	1489	TOL6	TOM1-like protein 6
310740585327148	307558116912842	310525188446045	314413433074951	hydrogen peroxide catabolic process [GO:0042744];response to oxidative stress [GO:0006979]	extracellular region [GO:0005576];vacuole [GO:0005773]	heme binding [GO:0020037];metal ion binding [GO:0046872];peroxidase activity [GO:0004601]	15	0	182.51	98816000000	77	2	4.6	2	5.2	O80912	O80912	1490	PER23	Peroxidase 23
230570869445801	253268375396729	257877082824707	251296310424805	vesicle-mediated transport [GO:0016192]	cytosol [GO:0005829];endoplasmic reticulum [GO:0005783];Golgi apparatus [GO:0005794];nucleus [GO:0005634]	GTPase activator activity [GO:0005096];metal ion binding [GO:0046872]	18	0	181.4	3218100000	55	14.7	21.9	16.9	10.1	O80925	O80925	1492	AGD7	ADP-ribosylation factor GTPase-activating protein AGD7
NaN	260267333984375	NaN	260888557434082	cytoplasmic translation [GO:0002181]	cytosolic large ribosomal subunit [GO:0022625];endoplasmic reticulum [GO:0005783]	structural constituent of ribosome [GO:0003735]	12	0	10.927	2277600000	17	6.2	15.9	6.2	15.9	O80929	O80929	1493	RPL36A	60S ribosomal protein L36-1
331557655334473	340681610107422	339587821960449	338236389160156	defense response to bacterium [GO:0042742]	apoplast [GO:0048046];chloroplast [GO:0009507];chloroplast stroma [GO:0009570];endoplasmic reticulum [GO:0005783];thylakoid [GO:0009579]	copper ion binding [GO:0005507]	38	0	323.31	174840000000	711	70.2	70.2	69.8	69.5	O80934	O80934	1494	At2g37660	Uncharacterized protein At2g37660, chloroplastic
246267833709717	NaN	NaN	246043338775635	defense response [GO:0006952];defense response to bacterium [GO:0042742];defense response to oomycetes [GO:0002229];response to salicylic acid [GO:0009751]	endoplasmic reticulum [GO:0005783];integral component of membrane [GO:0016021];plasma membrane [GO:0005886]	ATP binding [GO:0005524];carbohydrate binding [GO:0030246];transmembrane receptor protein serine/threonine kinase activity [GO:0004675]	6	0	5.134	953190000	14	4.9	0	0	3	O80939	O80939	1495	LECRK41	L-type lectin-domain containing receptor kinase IV.1
NaN	241175136566162	NaN	242914409637451	carbohydrate metabolic process [GO:0005975]	chloroplast [GO:0009507];Golgi apparatus [GO:0005794];integral component of membrane [GO:0016021]	acetyltransferase activity [GO:0016407]	1	0.001487	2.2814	142880000	1	0	2.7	0	2.7	O80940	O80940	1496	TBL15	Protein trichome birefringence-like 15
297299919128418	296428394317627	295035667419434	29432788848877	oxidation-reduction process [GO:0055114];response to cadmium ion [GO:0046686];response to cold [GO:0009409];response to salt stress [GO:0009651];response to toxic substance [GO:0009636];response to water deprivation [GO:0009414]	cytosol [GO:0005829];endoplasmic reticulum [GO:0005783]	alcohol dehydrogenase (NADP+) activity [GO:0008106];alditol:NADP+ 1-oxidoreductase activity [GO:0004032];aldo-keto reductase (NADP) activity [GO:0004033];NADP+ binding [GO:0070401];oxidoreductase activity [GO:0016491];steroid dehydrogenase activity [GO:0016229]	28	0	148.96	21806000000	332	59.2	55	54	53.7	O80944	O80944	1497	AKR4C8	Aldo-keto reductase family 4 member C8
222193946838379	223311500549316	21173225402832	209800148010254			carbohydrate binding [GO:0030246]	68	0	323.31	130810000000	572	12	7	6.6	4.6	O80950	O80950	1498	JAL22	Jacalin-related lectin 22
237581672668457	241908416748047	NaN	NaN	Golgi to vacuole transport [GO:0006896];protein targeting to vacuole [GO:0006623];ubiquitin-dependent protein catabolic process [GO:0006511]	clathrin-coated vesicle membrane [GO:0030665];endosome [GO:0005768];Golgi apparatus [GO:0005794];Golgi cis cisterna [GO:0000137];Golgi membrane [GO:0000139];Golgi transport complex [GO:0017119];integral component of membrane [GO:0016021];late endosome membrane [GO:0031902];membrane [GO:0016020];mitochondrion [GO:0005739];trans-Golgi network [GO:0005802]	calcium ion binding [GO:0005509];ubiquitin protein ligase activity [GO:0061630]	31	0	20.024	754870000	16	18.3	19.4	20.7	20.7	O80977	O80977	1500	VSR3	Vacuolar-sorting receptor 3
335089988708496	334611206054688	334206657409668	332843017578125	glycine decarboxylation via glycine cleavage system [GO:0019464]	apoplast [GO:0048046];chloroplast [GO:0009507];chloroplast envelope [GO:0009941];cytosol [GO:0005829];glycine cleavage complex [GO:0005960];mitochondrion [GO:0005739];vacuole [GO:0005773]	ATP binding [GO:0005524];glycine binding [GO:0016594];glycine dehydrogenase (decarboxylating) activity [GO:0004375];pyridoxal phosphate binding [GO:0030170]	91	0	323.31	224090000000	1273	65.6	65.7	63.3	66.3	O80988	O80988	1501	GLDP2	Glycine dehydrogenase (decarboxylating) 2, mitochondrial
252106685638428	NaN	27160099029541	273133716583252	iron-sulfur cluster assembly [GO:0016226]	CIA complex [GO:0097361];nucleus [GO:0005634]		14	0	43.29	5562300000	49	7.1	0	7.7	7.7	O80990	O80990	1502	CIA1	Protein CIA1
NaN	243366069793701	NaN	252389240264893	regulation of seed germination [GO:0010029]	ubiquitin ligase complex [GO:0000151]	protein heterodimerization activity [GO:0046982];ubiquitin binding [GO:0043130];ubiquitin-protein transferase activity [GO:0004842];zinc ion binding [GO:0008270]	5	0	4.4788	672270000	12	0	8.4	0	5.2	O80996	O80996	1504	BRIZ2	BRAP2 RING ZnF UBP domain-containing protein 2
31492618560791	314934768676758	316630992889404	316327018737793	isopentenyl diphosphate biosynthetic process, methylerythritol 4-phosphate pathway [GO:0019288];terpenoid biosynthetic process [GO:0016114]	chloroplast [GO:0009507];chloroplast stroma [GO:0009570]	4-(cytidine 5'-diphospho)-2-C-methyl-D-erythritol kinase activity [GO:0050515];ATP binding [GO:0005524]	28	0	221.35	34986000000	378	41.5	41.5	41.8	41.8	O81014	O81014	1509	ISPE	4-diphosphocytidyl-2-C-methyl-D-erythritol kinase, chloroplastic
274533252716064	275555953979492	27492130279541	270400924682617	phosphatidylethanolamine biosynthetic process [GO:0006646];phospholipid biosynthetic process [GO:0008654]	plasma membrane [GO:0005886]	ATP binding [GO:0005524];ethanolamine kinase activity [GO:0004305]	20	0	42.362	5493500000	148	27	19.8	21.7	10.7	O81024	O81024	1510	EMB1187	Probable ethanolamine kinase
259796085357666	244868316650391	259465923309326	262895774841309	ketone body biosynthetic process [GO:0046951];leucine catabolic process [GO:0006552];lipid metabolic process [GO:0006629]	mitochondrial matrix [GO:0005759];mitochondrion [GO:0005739]	hydroxymethylglutaryl-CoA lyase activity [GO:0004419];metal ion binding [GO:0046872]	12	0	50.874	2427800000	79	8.5	4.9	8.5	8.5	O81027	O81027	1511	HMGCL	Hydroxymethylglutaryl-CoA lyase, mitochondrial
241236839294434	242754020690918	241282539367676	243807334899902		integral component of membrane [GO:0016021]	ATP binding [GO:0005524];protein serine/threonine kinase activity [GO:0004674]	3	0.0047136	1.8645	154380000	2	0.8	0.8	0.8	0.8	O81069	O81069	1515	At2g28990	Probable leucine-rich repeat receptor-like protein kinase At2g28990
303979511260986	303082370758057	302916469573975	302161617279053	proteasomal protein catabolic process [GO:0010498];proteasomal ubiquitin-independent protein catabolic process [GO:0010499];proteasome-mediated ubiquitin-dependent protein catabolic process [GO:0043161];response to zinc ion [GO:0010043]	cytoplasm [GO:0005737];cytosol [GO:0005829];nucleus [GO:0005634];plastid [GO:0009536];proteasome complex [GO:0000502];proteasome core complex [GO:0005839];proteasome core complex, alpha-subunit complex [GO:0019773];vacuolar membrane [GO:0005774]	endopeptidase activity [GO:0004175];threonine-type endopeptidase activity [GO:0004298]	27	0	300.79	46955000000	307	69.5	71.1	70.7	53.3	O81146	O81146	1519	PAA1	Proteasome subunit alpha type-6-A
282781257629395	2850559425354	28215259552002	281269645690918	proteasomal protein catabolic process [GO:0010498];proteasomal ubiquitin-independent protein catabolic process [GO:0010499];proteasome-mediated ubiquitin-dependent protein catabolic process [GO:0043161]	cytoplasm [GO:0005737];cytosol [GO:0005829];cytosolic ribosome [GO:0022626];mitochondrion [GO:0005739];nucleus [GO:0005634];polysomal ribosome [GO:0042788];proteasome complex [GO:0000502];proteasome core complex [GO:0005839];proteasome core complex, alpha-subunit complex [GO:0019773]	endopeptidase activity [GO:0004175];structural constituent of ribosome [GO:0003735];threonine-type endopeptidase activity [GO:0004298]	25	0	98.474	12378000000	126	58.5	52.8	69.1	53.3	O81147	O81147	1520	PAA2	Proteasome subunit alpha type-6-B
297674446105957	298657760620117	298383846282959	298367900848389	proteasomal protein catabolic process [GO:0010498];proteasomal ubiquitin-independent protein catabolic process [GO:0010499];proteasome-mediated ubiquitin-dependent protein catabolic process [GO:0043161];response to cadmium ion [GO:0046686]	cytoplasm [GO:0005737];cytosol [GO:0005829];cytosolic ribosome [GO:0022626];mitochondrion [GO:0005739];nucleus [GO:0005634];proteasome complex [GO:0000502];proteasome core complex [GO:0005839];proteasome core complex, alpha-subunit complex [GO:0019773];vacuole [GO:0005773]	endopeptidase activity [GO:0004175];threonine-type endopeptidase activity [GO:0004298]	24	0	323.31	33467000000	324	53.2	56.8	47.2	54	O81148	O81148	1521	PAC1	Proteasome subunit alpha type-4-A
283160934448242	285748119354248	286549224853516	286119289398193	proteasomal protein catabolic process [GO:0010498];proteasomal ubiquitin-independent protein catabolic process [GO:0010499];proteasome-mediated ubiquitin-dependent protein catabolic process [GO:0043161];response to cadmium ion [GO:0046686]	cytoplasm [GO:0005737];cytosol [GO:0005829];cytosolic ribosome [GO:0022626];nucleus [GO:0005634];plasma membrane [GO:0005886];polysomal ribosome [GO:0042788];proteasome complex [GO:0000502];proteasome core complex [GO:0005839];proteasome core complex, alpha-subunit complex [GO:0019773];vacuolar membrane [GO:0005774]	endopeptidase activity [GO:0004175];ribonuclease activity [GO:0004540];structural constituent of ribosome [GO:0003735];threonine-type endopeptidase activity [GO:0004298]	15	0	323.31	13753000000	194	49.4	49.4	49.4	49.4	O81149	O81149	1522	PAE1	Proteasome subunit alpha type-5-A
314825553894043	316696605682373	316194248199463	315851306915283	defense response to bacterium [GO:0042742];embryo development ending in seed dormancy [GO:0009793];response to zinc ion [GO:0010043]	cytosol [GO:0005829];mitochondrial matrix [GO:0005759];mitochondrion [GO:0005739]	copper ion binding [GO:0005507];manganese ion binding [GO:0030145];metal ion binding [GO:0046872];superoxide dismutase activity [GO:0004784]	22	0	323.31	44159000000	337	73.2	74.9	73.2	73.6	O81235	O81235	1524	MSD1	Superoxide dismutase [Mn] 1, mitochondrial
255065174102783	253920497894287	255320167541504	255277881622314	protein import into chloroplast stroma [GO:0045037];protein targeting to chloroplast [GO:0045036]	chloroplast [GO:0009507];chloroplast envelope [GO:0009941];chloroplast outer membrane [GO:0009707];cytosol [GO:0005829];integral component of membrane [GO:0016021];plastid [GO:0009536];TOC-TIC supercomplex I [GO:0061927]	chaperone binding [GO:0051087];G protein-coupled receptor activity [GO:0004930];GTP binding [GO:0005525];GTPase activity [GO:0003924];metal ion binding [GO:0046872];ribosomal small subunit binding [GO:0043024];transmembrane signaling receptor activity [GO:0004888]	10	0	16.709	1089700000	36	3	3.1	2.3	2	O81283	O81283	1525	TOC159	Translocase of chloroplast 159, chloroplastic
250117568969727	248289051055908	248899478912354	246854400634766		vacuolar membrane [GO:0005774];vacuole [GO:0005773]		3	0	15.386	843840000	21	14.4	14.4	14.4	15.6	O81296	O81296	1526	At4g02370	AT4g02370 protein
27326717376709	275876350402832	273085193634033	274430046081543		peroxisome [GO:0005777]	hydrolase activity [GO:0016787]	16	0	71.618	5820800000	118	19.1	27.5	26.5	14.8	O81299	O81299	1527	At4g02340	AT4g02340 protein
NaN	NaN	249653434753418	247990703582764	embryo development ending in seed dormancy [GO:0009793]			6	0	8.6655	486580000	16	0	0	1.9	1.9	O81325	O81325	1528	F6N15.2	ARM repeat superfamily protein
253728199005127	NaN	237236957550049	254672794342041	cell wall organization [GO:0071555];cellulose catabolic process [GO:0030245]	extracellular region [GO:0005576]	cellulase activity [GO:0008810]	3	0	7.1676	966440000	19	2.3	0	1.7	2.3	O81416;O49296	O81416	1529	At4g02290	Endoglucanase 17
302656192779541	303913078308105	303759632110596	304003963470459	photoinhibition [GO:0010205];response to abscisic acid [GO:0009737];response to cold [GO:0009409]	chloroplast [GO:0009507];chloroplast stroma [GO:0009570];chloroplast thylakoid [GO:0009534];chloroplast thylakoid membrane [GO:0009535];cytosol [GO:0005829];nucleus [GO:0005634];plastoglobule [GO:0010287];stromule [GO:0010319];thylakoid [GO:0009579];thylakoid lumen [GO:0031977]		20	0	193.81	17966000000	241	52.2	45.9	59.7	59.7	O81439	O81439	1530	PAP1	Probable plastid-lipid-associated protein 1, chloroplastic
260482864379883	256747074127197	259951801300049	254024963378906	chromatin organization [GO:0006325];regulation of transcription, DNA-templated [GO:0006355]	cytosol [GO:0005829];nucleus [GO:0005634]	metal ion binding [GO:0046872];methylated histone binding [GO:0035064]	7	0	9.0397	2094900000	47	17.3	12.5	16.1	12.9	O81488	O81488	1531	AL4	PHD finger protein ALFIN-LIKE 4
248925437927246	252570266723633	243111209869385	255211219787598		anchored component of membrane [GO:0031225];anchored component of plasma membrane [GO:0046658]	electron transfer activity [GO:0009055]	2	0	8.5995	541910000	13	11.2	11.2	19.8	11.2	O81500	O81500	1534	At5g26330	At5g26330
245922355651855	24613073348999	214863529205322	NaN		cytoplasm [GO:0005737];cytosol [GO:0005829];microtubule [GO:0005874];plasma membrane [GO:0005886]		30	0	164.54	9982900000	152	1.8	1.1	2	0	O81629	O81629	1535	KLCR1	Protein KINESIN LIGHT CHAIN-RELATED 1
329162368774414	328837089538574	328973159790039	329111022949219	actin filament bundle assembly [GO:0051017];actin filament capping [GO:0051693];actin filament severing [GO:0051014];actin polymerization or depolymerization [GO:0008154]	actin cytoskeleton [GO:0015629];cytoplasm [GO:0005737];cytosol [GO:0005829]	actin filament binding [GO:0051015]	100	0	323.31	182370000000	1550	68.5	68.9	66.8	68.9	O81644	O81644	1537	VLN2	Villin-2
324079360961914	323182106018066	324277229309082	323933296203613	actin filament bundle assembly [GO:0051017];actin filament capping [GO:0051693];actin filament severing [GO:0051014];actin polymerization or depolymerization [GO:0008154]	actin cytoskeleton [GO:0015629];actin filament [GO:0005884];cytoplasm [GO:0005737];cytosol [GO:0005829]	actin filament binding [GO:0051015]	84	0	323.31	89045000000	1042	61.7	62.7	62.5	65.2	O81645	O81645	1538	VLN3	Villin-3
275622367858887	279612426757813	281488971710205	27934103012085	response to abscisic acid [GO:0009737]	plasma membrane [GO:0005886];vacuole [GO:0005773]	magnesium-dependent protein serine/threonine phosphatase activity [GO:0004724];metal ion binding [GO:0046872];protein serine/threonine phosphatase activity [GO:0004722]	24	0	108.31	8167600000	136	34.1	42.8	33.8	29	O81716	O81716	1539	PPC4-2	Probable protein phosphatase 2C 21
267814426422119	265331611633301	269644412994385	267244243621826	methylation [GO:0032259];peptidyl-diphthamide biosynthetic process from peptidyl-histidine [GO:0017183]		diphthine synthase activity [GO:0004164]	8	0	75.479	2802000000	92	21.7	17	22	20.2	O81769	O81769	1541	At4g31790	Probable diphthine methyl ester synthase
NaN	239452095031738	24022590637207	238885536193848	response to oomycetes [GO:0002239]	plasma membrane [GO:0005886]	FAD binding [GO:0071949];monooxygenase activity [GO:0004497]	7	0	33.551	603660000	27	0	2.5	2.5	2.5	O81816	O81816	1542	MO2	Monooxygenase 2
297322902679443	292536544799805	288214683532715	288811321258545	auxin homeostasis [GO:0010252];camalexin biosynthetic process [GO:0010120];positive regulation of camalexin biosynthetic process [GO:1901183];response to auxin [GO:0009733]	cytoplasm [GO:0005737]	acid-amino acid ligase activity [GO:0016881];indole-3-acetic acid amido synthetase activity [GO:0010279]	24	0	88.532	3195700000	56	37.4	29.9	32.7	33.3	O81829	O81829	1543	GH3.5	Indole-3-acetic acid-amido synthetase GH3.5
292515563964844	29172384262085	290481719970703	294619750976563	aspartate family amino acid biosynthetic process [GO:0009067];homoserine biosynthetic process [GO:0009090];lysine biosynthetic process via diaminopimelate [GO:0009089];methionine biosynthetic process [GO:0009086];threonine biosynthetic process [GO:0009088]	chloroplast [GO:0009507];chloroplast stroma [GO:0009570]	aspartate kinase activity [GO:0004072];ATP binding [GO:0005524];homoserine dehydrogenase activity [GO:0004412];NADP binding [GO:0050661]	51	0	150.42	15502000000	267	31.6	31.9	28.2	27.6	O81852	O81852	1544	AKHSDH2	Bifunctional aspartokinase/homoserine dehydrogenase 2, chloroplastic
282410907745361	283464660644531	285979347229004	284642753601074	chitin catabolic process [GO:0006032];polysaccharide catabolic process [GO:0000272];response to abscisic acid [GO:0009737];response to jasmonic acid [GO:0009753];response to salt stress [GO:0009651]	cell wall [GO:0005618];extracellular region [GO:0005576];secretory vesicle [GO:0099503]	chitin binding [GO:0008061];chitinase activity [GO:0004568];endochitinase activity [GO:0008843];exochitinase activity [GO:0035885]	21	0	323.31	35606000000	251	33.5	30.9	31.1	30.9	O81862	O81862	1545	ChiC	Class V chitinase
273242301940918	274395217895508	274566192626953	277154178619385		chloroplast thylakoid lumen [GO:0009543]	peptidyl-prolyl cis-trans isomerase activity [GO:0003755]	4	0	22.769	2265700000	38	21	21	17.5	17.5	O81864	O81864	1546	FKBP17-1	Peptidyl-prolyl cis-trans isomerase FKBP17-1, chloroplastic
255107479095459	258326282501221	256880588531494	256673622131348	response to insect [GO:0009625]		carbohydrate binding [GO:0030246];proteoglycan binding [GO:0043394]	5	0	47.59	680960000	34	15.9	17.9	18.7	18.7	O81865	O81865	1547	PP2A1	Protein PHLOEM PROTEIN 2-LIKE A1
295914211273193	296583824157715	294956226348877	292304096221924	galactose metabolic process [GO:0006012];L-ascorbic acid biosynthetic process [GO:0019853]	cytosol [GO:0005829]	L-galactose dehydrogenase activity [GO:0010349];oxidoreductase activity [GO:0016491]	14	0	119.72	11268000000	194	42.6	45.1	42	44.5	O81884	O81884	1548	LGALDH	L-galactose dehydrogenase
240248756408691	241353969573975	NaN	244344081878662		extracellular space [GO:0005615]		4	0	3.6762	404440000	5	6.7	11	4.3	11	O81888	O81888	1549	T16L1.210	AT4g33720
NaN	NaN	24338716506958	232724151611328	protein phosphorylation [GO:0006468];recognition of pollen [GO:0048544]	integral component of membrane [GO:0016021];plasma membrane [GO:0005886];plasmodesma [GO:0009506];vacuole [GO:0005773]	ATP binding [GO:0005524];carbohydrate binding [GO:0030246];protein serine/threonine kinase activity [GO:0004674];transmembrane receptor protein serine/threonine kinase activity [GO:0004675];ubiquitin protein ligase binding [GO:0031625]	5	0	10.476	268040000	12	0.9	0.9	3.2	2.2	O81905	O81905	1550	SD18	Receptor-like serine/threonine-protein kinase SD1-8
303778247833252	30445198059082	300852470397949	302486419677734	cellular copper ion homeostasis [GO:0006878];copper ion transport [GO:0006825];response to cadmium ion [GO:0046686]	chloroplast [GO:0009507];cytosol [GO:0005829]	copper chaperone activity [GO:0016531];protein domain specific binding [GO:0019904]	28	0	323.31	48826000000	376	95.9	93.4	95.9	93.4	O82089	O82089	1552	CCH	Copper transport protein CCH
226279182434082	227461605072021	227407569885254	234909381866455	defense response to insect [GO:0002213];response to copper ion [GO:0046688];response to insect [GO:0009625];response to jasmonic acid [GO:0009753];response to oxidative stress [GO:0006979];response to wounding [GO:0009611]	cytosolic ribosome [GO:0022626];vacuole [GO:0005773]	acid phosphatase activity [GO:0003993];nutrient reservoir activity [GO:0045735]	6	0	3.1264	259390000	9	12.8	12.8	12.8	12.5	O82122	O82122	1553	VSP2	Vegetative storage protein 2
268646697998047	270176525115967	270908336639404	273322772979736	cytidine to uridine editing [GO:0016554];mitochondrial mRNA modification [GO:0080156];mRNA processing [GO:0006397]	endoplasmic reticulum [GO:0005783];mitochondrion [GO:0005739]	protein dimerization activity [GO:0046983];protein homodimerization activity [GO:0042803]	6	0	14.931	2416400000	25	9.9	13.4	9.9	9.9	O82169	O82169	1554	MORF6	Multiple organellar RNA editing factor 6, mitochondrial
282550735473633	283429107666016	278832607269287	276037826538086	glycine decarboxylation via glycine cleavage system [GO:0019464]	glycine cleavage complex [GO:0005960];mitochondrion [GO:0005739]	ATP binding [GO:0005524]	11	0	131.9	15577000000	128	39.1	26.3	19.2	19.2	O82179	O82179	1555	GDH2	Glycine cleavage system H protein 2, mitochondrial
NaN	NaN	27058479309082	246428985595703	malate metabolic process [GO:0006108];pyruvate metabolic process [GO:0006090]	chloroplast [GO:0009507];cytosol [GO:0005829];mitochondrion [GO:0005739]	malate dehydrogenase (decarboxylating) (NAD+) activity [GO:0004471];malate dehydrogenase (decarboxylating) (NADP+) activity [GO:0004473];malic enzyme activity [GO:0004470];metal ion binding [GO:0046872];NAD binding [GO:0051287];oxaloacetate decarboxylase activity [GO:0008948]	15	0	6.3178	6009400000	27	6.7	6.7	13.1	10	O82191	O82191	1556	NADP-ME1	NADP-dependent malic enzyme 1
254859733581543	256895790100098	257306308746338	25131477355957	inositol catabolic process [GO:0019310];L-ascorbic acid biosynthetic process [GO:0019853]	cytoplasm [GO:0005737]	inositol oxygenase activity [GO:0050113];iron ion binding [GO:0005506]	4	0.00019161	2.7928	415210000	12	12.3	9.5	6.6	9.5	O82200	O82200	1557	MIOX2	Inositol oxygenase 2
NaN	227799263000488	NaN	230457859039307				2	0	3.7361	104170000	4	0	4.2	0	4.2	O82202	O82202	1559	At2g19780	Leucine-rich repeat (LRR) family protein
267930278778076	265446434020996	269865264892578	265269222259521	adaxial/abaxial pattern specification [GO:0009955];leaf morphogenesis [GO:0009965];translation [GO:0006412]	cell wall [GO:0005618];chloroplast [GO:0009507];cytoplasm [GO:0005737];cytosolic large ribosomal subunit [GO:0022625];cytosolic ribosome [GO:0022626];mitochondrion [GO:0005739];nucleolus [GO:0005730];nucleoplasm [GO:0005654];nucleus [GO:0005634];plasma membrane [GO:0005886];plasmodesma [GO:0009506]	structural constituent of ribosome [GO:0003735]	27	0	323.31	78731000000	248	23.8	17.5	35	22.4	O82204	O82204	1560	RPL28A	60S ribosomal protein L28-1
275125427246094	278729095458984	277989082336426	279762897491455	protein import into chloroplast stroma [GO:0045037]	chloroplast [GO:0009507];chloroplast envelope [GO:0009941];chloroplast stroma [GO:0009570];chloroplast thylakoid membrane [GO:0009535];vacuole [GO:0005773]	DNA binding [GO:0003677]	8	0	35.214	2186900000	41	33	31.9	25.3	31.9	O82230	O82230	1562	STIC2	Nucleoid-associated protein At2g24020, chloroplastic
257252559661865	256037673950195	257354927062988	257804660797119		cytosol [GO:0005829];eukaryotic translation initiation factor 4F complex [GO:0016281]	mRNA binding [GO:0003729];translation initiation factor activity [GO:0003743]	20	0	32.371	2306600000	53	10	5.9	5.9	5	O82233	O82233	1563	EIF(ISO)4G2	Eukaryotic translation initiation factor isoform 4G-2
287855949401855	287087574005127	288121318817139	286958427429199	chloroplast organization [GO:0009658];leaf development [GO:0048366];ribosome disassembly [GO:0032790]	chloroplast [GO:0009507];vacuole [GO:0005773]	ribosome binding [GO:0043022];translation initiation factor activity [GO:0003743]	15	0	46.452	3551900000	87	34.9	37.8	29.5	32.1	O82234	O82234	1564	IF3-2	Translation initiation factor IF3-2, chloroplastic
307400493621826	309459381103516	306248817443848	304881706237793		cytosol [GO:0005829];Golgi apparatus [GO:0005794];plasma membrane [GO:0005886];vacuole [GO:0005773]	hydrolase activity [GO:0016787]	15	0	234.31	39211000000	267	77.8	77.8	70.4	77.8	O82240	O82240	1565	At2g47710	Adenine nucleotide alpha hydrolases-like superfamily protein
318924026489258	320322303771973	319884777069092	320004463195801	chloroplast organization [GO:0009658];photosystem II repair [GO:0010206];protein catabolic process [GO:0030163];proteolysis [GO:0006508]	chloroplast [GO:0009507];chloroplast envelope [GO:0009941];chloroplast stroma [GO:0009570];chloroplast stromal thylakoid [GO:0009533];chloroplast thylakoid membrane [GO:0009535];cytosol [GO:0005829]	serine-type endopeptidase activity [GO:0004252]	33	0	323.31	54115000000	458	45.6	52.9	50.7	47.8	O82261	O82261	1566	DEGP2	Protease Do-like 2, chloroplastic
277460556030273	27815128326416	275699329376221	276080894470215				22	0	98.497	8912400000	129	19.7	19.5	19.5	23.5	O82263	O82263	1567	At2g47960	At2g47960/T9J23.10
288529930114746	289876651763916	290957202911377	290470809936523	proteasome-mediated ubiquitin-dependent protein catabolic process [GO:0043161];ubiquitin-dependent protein catabolic process [GO:0006511]	cytosol [GO:0005829];nucleus [GO:0005634]	ubiquitin binding [GO:0043130];ubiquitin protein ligase binding [GO:0031625]	16	0	136.6	11834000000	189	34.9	27.4	37.8	34.6	O82264	O82264	1568	At2g47970	NPL4-like protein 2
264730834960938	270513401031494	26678955078125	271033954620361	cell division [GO:0051301];meiotic sister chromatid cohesion, centromeric [GO:0051754];monopolar spindle attachment to meiosis I kinetochore [GO:0051455];sister chromatid cohesion [GO:0007062]	chromatin [GO:0000785];chromosome [GO:0005694];cohesin complex [GO:0008278];nucleus [GO:0005634]	chromatin binding [GO:0003682]	6	0	8.7245	4693100000	37	0.9	0.9	2.2	2.2	O82265	O82265	1569	SCC3	Sister-chromatid cohesion protein 3
299663677215576	29079740524292	296900253295898	302088565826416	phosphorylation [GO:0016310]	chloroplast [GO:0009507]		19	0	163.7	9811700000	153	49.9	44.2	46.3	44.7	O82290	O82290	1571	SKL2	Probable inactive shikimate kinase like 2, chloroplastic
326813125610352	32729190826416	328178558349609	326165161132813		chloroplast [GO:0009507];chloroplast thylakoid [GO:0009534];chloroplast thylakoid membrane [GO:0009535];endoplasmic reticulum [GO:0005783];plastid [GO:0009536];plastoglobule [GO:0010287];thylakoid [GO:0009579]		23	0	323.31	97402000000	404	54.8	54	54.8	54.8	O82291	O82291	1572	PAP3	Probable plastid-lipid-associated protein 3, chloroplastic
330541038513184	330106201171875	329480628967285	330077171325684		chloroplast [GO:0009507];chloroplast stroma [GO:0009570];cytoplasm [GO:0005737];endoplasmic reticulum [GO:0005783];nucleus [GO:0005634];ribonucleoprotein complex [GO:1990904];thylakoid [GO:0009579]	mRNA binding [GO:0003729]	25	0	323.31	78537000000	376	59.4	59.4	59.4	59.4	O82299	O82299	1573	At2g35410	Putative chloroplast RNA binding protein
259199810028076	262852268218994	256913909912109	25700891494751			3'-5' exonuclease activity [GO:0008408];RNA binding [GO:0003723]	10	0	14.741	2271300000	47	10.3	11.4	24	10	O82306	O82306	1574	At2g25910	3'-5' exonuclease domain-containing protein / K homology domain-containing protein / KH domain-containing protein
298057670593262	296363201141357	295441608428955	28557933807373		chloroplast [GO:0009507];vacuole [GO:0005773]		16	0	89.101	6170300000	102	27.2	26.3	30.5	29.6	O82314	O82314	1575	At2g25830	Probable transcriptional regulatory protein At2g25830
273650283813477	271995716094971	272434539794922	279383716583252	response to desiccation [GO:0009269]	cytosol [GO:0005829];plasma membrane [GO:0005886]		10	0	64.711	4139400000	58	7.2	7.2	7.2	7.2	O82355	O82355	1577	At2g46140	Desiccation-related protein At2g46140
250379161834717	252867603302002	251232891082764	250340595245361	pantothenate biosynthetic process [GO:0015940]	mitochondrion [GO:0005739]	3-methyl-2-oxobutanoate hydroxymethyltransferase activity [GO:0003864];magnesium ion binding [GO:0000287]	5	0	3.9632	565210000	8	11	14.1	14.1	14.1	O82357	O82357	1578	KPHMT1	3-methyl-2-oxobutanoate hydroxymethyltransferase 1, mitochondrial
NaN	248404769897461	NaN	249191627502441		intracellular membrane-bounded organelle [GO:0043231]	daphnetin 3-O-glucosyltransferase activity [GO:0102360];flavonol 3-O-glucosyltransferase activity [GO:0047893];flavonol 7-O-beta-glucosyltransferase activity [GO:0033836];myricetin 3-O-glucosyltransferase activity [GO:0102425];quercetin 3'-O-glucosyltransferase activity [GO:0080045];quercetin 7-O-glucosyltransferase activity [GO:0080044];UDP-glucosyltransferase activity [GO:0035251];UDP-glycosylt…	30	0	181.75	11509000000	136	0	2.7	0	4	O82381	O82381	1579	UGT71C1	Flavonol 3-O-glucosyltransferase UGT71C1
23913969039917	252344722747803	240882892608643	228796653747559		intracellular membrane-bounded organelle [GO:0043231]	daphnetin 3-O-glucosyltransferase activity [GO:0102360];flavonol 3-O-glucosyltransferase activity [GO:0047893];myricetin 3-O-glucosyltransferase activity [GO:0102425];quercetin 3-O-glucosyltransferase activity [GO:0080043];UDP-glycosyltransferase activity [GO:0008194]	13	0	16.853	1432200000	34	5.6	5.6	4.9	3.4	O82383	O82383	1581	UGT71D1	UDP-glycosyltransferase 71D1
234822235107422	235908088684082	241721878051758	229921875	response to vitamin B1 [GO:0010266];thiamine biosynthetic process [GO:0009228];thiamine diphosphate biosynthetic process [GO:0009229]	chloroplast [GO:0009507];chloroplast stroma [GO:0009570];plastid [GO:0009536]	4 iron, 4 sulfur cluster binding [GO:0051539];carbon-carbon lyase activity [GO:0016830];iron-sulfur cluster binding [GO:0051536];metal ion binding [GO:0046872];protein domain specific binding [GO:0019904]	43	0	323.31	25733000000	331	6.4	6.4	11.2	5.9	O82392	O82392	1582	THIC	Phosphomethylpyrimidine synthase, chloroplastic
30968635559082	311640491485596	313636932373047	313091049194336	glyoxylate cycle [GO:0006097];malate metabolic process [GO:0006108];regulation of fatty acid beta-oxidation [GO:0031998];regulation of photorespiration [GO:0080093];tricarboxylic acid cycle [GO:0006099]	chloroplast [GO:0009507];cytoplasm [GO:0005737];peroxisome [GO:0005777]	L-malate dehydrogenase activity [GO:0030060]	27	0	323.31	47767000000	496	60.5	68.4	52.5	56.8	O82399	O82399	1583	PMDH1	Malate dehydrogenase 1, peroxisomal
281060943603516	283161792755127	285889949798584	28424783706665	histidyl-tRNA aminoacylation [GO:0006427]	chloroplast [GO:0009507];mitochondrion [GO:0005739]	ATP binding [GO:0005524];histidine-tRNA ligase activity [GO:0004821]	18	0	23.989	5906700000	111	23.5	19.5	31.9	28.6	O82413	O82413	1584	At3g46100	Histidine--tRNA ligase, chloroplastic/mitochondrial
286198883056641	289640827178955	286513004302979	285562915802002	glutaminyl-tRNA aminoacylation [GO:0006425];glutamyl-tRNA aminoacylation [GO:0006424]	cytosol [GO:0005829];plastid [GO:0009536]	ATP binding [GO:0005524];glutamate-tRNA ligase activity [GO:0004818];glutamine-tRNA ligase activity [GO:0004819]	62	0	323.31	31309000000	394	33	29.6	32.1	25.2	O82462	O82462	1585	At5g26710	Glutamate--tRNA ligase, cytoplasmic
NaN	243817234039307	237928295135498	238969841003418		cytoplasm [GO:0005737];cytosol [GO:0005829];mitochondrion [GO:0005739];plastid [GO:0009536]	aldehyde-lyase activity [GO:0016832]	9	0	55.066	3386700000	52	0	3.4	7.5	3.4	O82487	O82487	1587	T12H20.10	Phosphoenolpyruvate carboxylase family protein
272095527648926	271493816375732	272665119171143	273495903015137		chloroplast [GO:0009507];cytosol [GO:0005829]	ribosome binding [GO:0043022];translation initiation factor activity [GO:0003743]	7	0	28.209	1792900000	48	34.8	46.1	47.5	34.8	O82499	O82499	1590	At4g11175	Translation initiation factor IF-1, chloroplastic
295316295623779	29626012802124	297176418304443	29815616607666	chloroplast fission [GO:0010020];organelle fission [GO:0048285]	chloroplast [GO:0009507];chloroplast stroma [GO:0009570];chloroplast thylakoid [GO:0009534];chloroplast thylakoid membrane [GO:0009535];cytoplasm [GO:0005737];endoplasmic reticulum [GO:0005783]	GTP binding [GO:0005525];GTPase activity [GO:0003924];protein self-association [GO:0043621]	19	0	304.54	15932000000	205	34.5	43.9	34.7	42.1	O82533	O82533	1592	FTSZ2-1	Cell division protein FtsZ homolog 2-1, chloroplastic
252375030517578	264507179260254	255963077545166	252825965881348	phosphate-containing compound metabolic process [GO:0006796]	cytosol [GO:0005829];nucleoplasm [GO:0005654]	inorganic diphosphatase activity [GO:0004427];magnesium ion binding [GO:0000287]	17	0	16.971	2907400000	35	22.7	13.4	37.5	18.5	O82597	O82597	1593	PPA5	Soluble inorganic pyrophosphatase 5
252408905029297	253239898681641	254694232940674	255892658233643	positive regulation of DNA repair [GO:0045739]	BRCA1-A complex [GO:0070531];BRISC complex [GO:0070552]		6	0	3.3492	1195600000	23	9.8	6.8	6.8	9.5	O82638	O82638	1594	At4g32960	At4g32960
299215297698975	300344619750977	299614086151123	299192581176758	defense response [GO:0006952];intracellular signal transduction [GO:0035556];negative regulation of defense response [GO:0031348];protein dephosphorylation [GO:0006470]	cytoplasm [GO:0005737];nucleus [GO:0005634];plasma membrane [GO:0005886]	kinase binding [GO:0019900];MAP kinase tyrosine phosphatase activity [GO:0033550];protein tyrosine phosphatase activity [GO:0004725]	27	0	280.14	24100000000	367	57.9	62.1	59.1	61.2	O82656	O82656	1596	PTP1	Protein-tyrosine-phosphatase PTP1
335452423095703	335832939147949	335908966064453	334647750854492	response to cadmium ion [GO:0046686];succinyl-CoA metabolic process [GO:0006104];tricarboxylic acid cycle [GO:0006099]	mitochondrion [GO:0005739];succinate-CoA ligase complex [GO:0042709]	ATP binding [GO:0005524];copper ion binding [GO:0005507];magnesium ion binding [GO:0000287];succinate-CoA ligase (ADP-forming) activity [GO:0004775];succinate-CoA ligase (GDP-forming) activity [GO:0004776]	82	0	323.31	254700000000	1506	86.5	86.5	86.7	85.5	O82662	O82662	1597	At2g20420	Succinate--CoA ligase [ADP-forming] subunit beta, mitochondrial
314039554595947	313848915100098	313758068084717	312512397766113	mitochondrial electron transport, succinate to ubiquinone [GO:0006121];tricarboxylic acid cycle [GO:0006099]	cell wall [GO:0005618];mitochondrial respiratory chain complex II, succinate dehydrogenase complex (ubiquinone) [GO:0005749];mitochondrion [GO:0005739];plastid [GO:0009536];respiratory chain complex II [GO:0045273]	ATP binding [GO:0005524];cobalt ion binding [GO:0050897];electron transfer activity [GO:0009055];flavin adenine dinucleotide binding [GO:0050660];oxidoreductase activity [GO:0016491];succinate dehydrogenase (ubiquinone) activity [GO:0008177];succinate dehydrogenase activity [GO:0000104]	49	0	323.31	118870000000	847	55.4	48.3	53.3	53.3	O82663	O82663	1598	SDH1-1	Succinate dehydrogenase [ubiquinone] flavoprotein subunit 1, mitochondrial
260620460510254	263817405700684	264100074768066	262974185943604	pollen tube growth [GO:0009860];root hair cell tip growth [GO:0048768]	cytoplasm [GO:0005737];cytosol [GO:0005829];nucleus [GO:0005634]	metal ion binding [GO:0046872];protein serine/threonine phosphatase activity [GO:0004722]	12	0	19.177	1880800000	44	9.6	14.8	23.5	28.4	O82734	O82734	1599	TOPP8	Serine/threonine-protein phosphatase PP1 isozyme 8
308364295959473	309423770904541	309324836730957	308673973083496	regulation of gene expression [GO:0010468]	cytoplasm [GO:0005737];cytosol [GO:0005829];vacuole [GO:0005773]	mRNA binding [GO:0003729]	24	0	186.76	39649000000	360	36.7	34.7	35.1	35.1	O82762	O82762	1600	At2g25970	F17H15.1/F17H15.1
[truncated: 3,275 more rows]
