# Supplementary material for: Proteome Dynamics of Persulfidation in Leaf Tissue under Light/Dark Conditions and Carbon Deprivation
Source: Antioxidants (Basel). 2023 Mar 23;12(4):789. doi: 10.3390/antiox12040789 (PMC10135009; doi:10.3390/antiox12040789)
Supplement: Supplementary file 1 [file antioxidants-12-00789-s001.zip › Dataset S2.xlsx]

## Sheet: S2_EN_2 REPLICAS
Dataset 2. Identified proteins in the sample set 2 (S2) in at least two independent replicas
LFQ intensity S21	LFQ intensity S22	LFQ intensity S23	LFQ intensity S24	Gene ontology (biological process)	Gene ontology (cellular component)	Gene ontology (molecular function)	Peptides	Q-value	Score	MS/MS count	Sequence coverage S21 [%]	Sequence coverage S22 [%]	Sequence coverage S23 [%]	Sequence coverage S24 [%]	Protein IDs	Majority protein IDs	id	Gene name	Protein name
#!{Type}E	E	E	E	C	C	C	N	N	N	N	N	N	N	N	T	T	T	T	T
#!{C:Group1}LFQ intensity S2	LFQ intensity S2	LFQ intensity S2	LFQ intensity S2
295186519622803	293222961425781	293593845367432	294403743743896	photosynthesis [GO:0015979]	extrinsic component of membrane [GO:0019898];photosystem II oxygen evolving complex [GO:0009654]	calcium ion binding [GO:0005509]	17	0	66.223	100	29.5	34.6	37.8	30.8	A0A178U9N5	A0A178U9N5	1	PPD5	PsbP domain protein (Mog1/PsbP/DUF1795-like photosystem II reaction center PsbP family protein)
271085891723633	273815422058105	274559936523438	270831432342529	cell wall modification [GO:0042545];pectin catabolic process [GO:0045490]		aspartyl esterase activity [GO:0045330];enzyme inhibitor activity [GO:0004857];pectinesterase activity [GO:0030599]	9	0	106.78	60	9	12.8	7.5	12.8	A0A178UA07	A0A178UA07	2	At5g09760	Plant invertase/pectin methylesterase inhibitor superfamily
253499946594238	249516258239746	254901428222656	247865123748779				9	0	31.697	50	41	32.2	30.6	33.9	A0A178UE66	A0A178UE66	3	PBS2	Cysteine and histidine-rich domain-containing protein RAR1
223939094543457	207980422973633	225147514343262	209358901977539		cytosol [GO:0005829]	5-diphosphoinositol pentakisphosphate 3-kinase activity [GO:0102092];ATP binding [GO:0005524];diphosphoinositol-pentakisphosphate kinase activity [GO:0033857];inositol heptakisphosphate kinase activity [GO:0000829];inositol hexakisphosphate 1-kinase activity [GO:0052723];inositol hexakisphosphate 3-kinase activity [GO:0052724];inositol hexakisphosphate 5-kinase activity [GO:0000832]	38	0	74.976	143	1	2.3	1.7	1.9	A0A178VEL3	A0A178VEL3	5	AtVIP1	Inositol hexakisphosphate and diphosphoinositol-pentakisphosphate kinase
245940017700195	24296350479126	242020225524902	243484077453613			FMN binding [GO:0010181];oxidoreductase activity [GO:0016491]	4	0.0086572	1.5291	6	3.6	3.6	3.6	3.6	A0A178VMD8	A0A178VMD8	6	HAOX2	Aldolase-type TIM barrel family protein
259458560943604	249771862030029	248455104827881	253193798065186			UDP-glycosyltransferase activity [GO:0008194]	3	0	3.7199	11	3.7	3.7	3.7	3.7	A0A178VRK6	A0A178VRK6	8	At2g30150	UDP-Glycosyltransferase superfamily protein
24988151550293	255627899169922	25820140838623	258894824981689	protein initiator methionine removal [GO:0070084]	cytoplasm [GO:0005737]	metal ion binding [GO:0046872];metalloaminopeptidase activity [GO:0070006]	9	0	4.8987	9	24.3	19	19.9	19.9	A0A178VUM7	A0A178VUM7	9	MAP2A	Methionine aminopeptidase 2
258137722015381	254817314147949	26007999420166	257823677062988	RNA metabolic process [GO:0016070]		RNA binding [GO:0003723];sequence-specific DNA binding [GO:0043565];single-stranded DNA binding [GO:0003697]	9	0	14.904	60	3.6	7.8	11.3	7.8	A0A178W0K0	A0A178W0K0	13	At2g37020	Translin family protein
246778812408447	262931270599365	266840496063232	26114221572876		small-subunit processome [GO:0032040]		5	0.0013038	2.3067	4	0.9	1.1	2	1.1	A0A178W3G2	A0A178W3G2	14	At1g69070	Nucleolar-like protein
227834281921387	23053279876709	228964099884033	226778602600098				14	0	60.791	61	2.8	5.3	2.8	7.5	A0A1I9LLC0	A0A1I9LLC0	17	CID4	CTC-interacting domain 4
NaN	23552038192749	NaN	232295074462891	microtubule nucleation [GO:0007020]	cytoplasm [GO:0005737];microtubule [GO:0005874];microtubule organizing center [GO:0005815];spindle pole [GO:0000922]	gamma-tubulin binding [GO:0043015]	3	0.0033021	2.0431	12	0	1.1	0	1.1	A0A1I9LLT8	A0A1I9LLT8	20	GCP4	Gamma-tubulin complex component
272579975128174	2740576171875	273968086242676	273019943237305			aspartic-type endopeptidase activity [GO:0004190]	7	0	26.925	74	6.8	3.7	5.9	6.6	A0A1I9LM46	A0A1I9LM46	22	At3g51330	Eukaryotic aspartyl protease family protein
307896270751953	305182209014893	301765270233154	306552295684814	carbohydrate metabolic process [GO:0005975]	integral component of membrane [GO:0016021]	beta-galactosidase activity [GO:0004565]	39	0	279.18	242	32.3	24.1	29.7	35	A0A1I9LM56	A0A1I9LM56	23	BGAL2	Beta-galactosidase
288863468170166	289699115753174	288503131866455	290151271820068			RNA binding [GO:0003723]	21	0	120.53	294	22.2	21.7	21.7	24.2	A0A1I9LM90	A0A1I9LM90	25	FLK	RNA-binding KH domain-containing protein
24275899887085	240665283203125	246547451019287	245559043884277	phloem development [GO:0010088]			6	0	11.152	14	1.5	1.5	3.3	1.5	A0A1I9LMF2	A0A1I9LMF2	27	SEOa	Sieve element occlusion protein
234977741241455	NaN	NaN	236464729309082		integral component of membrane [GO:0016021]		1	0.00094429	2.5477	2	20.8	0	0	20.8	A0A1I9LMI8	A0A1I9LMI8	29	At3g23450	Transmembrane protein
253308086395264	250583763122559	253612174987793	25751594543457	autophagy [GO:0006914];protein transport [GO:0015031]	cytoplasm [GO:0005737]	cysteine-type peptidase activity [GO:0008234]	10	0	60.132	50	9.5	7.7	12.8	9.5	A0A1I9LMQ9	A0A1I9LMQ9	32	At3g59950	Cysteine protease
241842727661133	244148693084717	25480806350708	246034278869629	de-etiolation [GO:0009704];response to far red light [GO:0010218];seed germination [GO:0009845]	integral component of membrane [GO:0016021];perinuclear region of cytoplasm [GO:0048471]	hydrolase activity, acting on carbon-nitrogen (but not peptide) bonds [GO:0016810]	3	0.0054093	1.7957	5	2.4	4.8	2.4	2.4	A0A1I9LN01	A0A1I9LN01	33	LAF3	Protein LONG AFTER FAR-RED 3
291514873504639	294755859375	300177040100098	29093053817749			RNA binding [GO:0003723]	11	0	34.628	54	19.6	21.3	16.1	20.8	A0A1I9LN63	A0A1I9LN63	34	At3g16230	Putative eukaryotic LigT
227589817047119	NaN	233941440582275	NaN	nucleotide-sugar metabolic process [GO:0009225]		dTDP-glucose 4,6-dehydratase activity [GO:0008460]	52	0	102.06	64	21.9	21.6	14.5	17.7	A0A1I9LN83	A0A1I9LN83	36	RHM3	Rhamnose biosynthesis 3
292506771087646	293190689086914	29418342590332	295339336395264				15	0	80.458	134	36.1	48.4	50.7	48.1	A0A1I9LNQ7	A0A1I9LNQ7	38	At3g02510	Regulator of chromosome condensation (RCC1) family protein
29568754196167	293943576812744	297516193389893	295621452331543				20	0	131.46	240	45	51.7	51.7	49.5	A0A1I9LNT2	A0A1I9LNT2	39	SDR1	NAD(P)-binding Rossmann-fold superfamily protein
29519983291626	298421058654785	297422370910645	296950969696045				8	0	62.724	165	27.4	27.4	34.4	34.4	A0A1I9LNZ1	A0A1I9LNZ1	40	At3g07470	Uncharacterized protein
336848907470703	336012306213379	33596794128418	335903396606445				22	0	43.56	43	0.5	1.6	1	1	A0A1I9LP28	A0A1I9LP28	41	At3g06530	ARM repeat superfamily protein
275027141571045	274493961334229	273615188598633	272118759155273	calcium-mediated signaling [GO:0019722]		calcium ion binding [GO:0005509]	8	0	76.319	90	30.4	26.2	35.5	28	A0A1I9LPJ2	A0A1I9LPJ2	42	CAM7	Calmodulin
NaN	242458305358887	243829116821289	NaN				10	0	12.992	13	0	1.5	3.3	0	A0A1I9LPW3	A0A1I9LPW3	44	At3g04490	Exportin-4 protein
263834552764893	272839202880859	269845714569092	267809429168701				27	0	159.12	85	1.1	0.5	1.5	1.1	A0A1I9LPZ1	A0A1I9LPZ1	45	At3g50370	Uncharacterized protein
338745422363281	323123550415039	323580703735352	31892765045166	cellular response to DNA damage stimulus [GO:0006974]		ATP binding [GO:0005524];protein serine/threonine kinase activity [GO:0004674]	6	0	3.4473	5	1.5	1.2	1.2	1.6	A0A1I9LQ79	A0A1I9LQ79	49	ATM	Serine/Threonine-kinase ATM-like protein
371548347473145	371557769775391	371034889221191	377739295959473	carbon utilization [GO:0015976]		carbonate dehydratase activity [GO:0004089];zinc ion binding [GO:0008270]	58	0	323.31	2321	99.6	92.7	99.6	99.6	A0A1I9LQB3	A0A1I9LQB3	50	CA1	Carbonic anhydrase
286221599578857	282494792938232	281818675994873	271877307891846			ATP binding [GO:0005524];helicase activity [GO:0004386]	4	0	3.2308	58	1.1	1.6	1.1	1.1	A0A1I9LQH7	A0A1I9LQH7	52	PIE1	SNF2 domain-containing protein / helicase domain-containing protein
252406711578369	25111795425415	252805442810059	252965602874756				5	0	4.1228	19	15.8	10	5.4	5.4	A0A1I9LQU5	A0A1I9LQU5	56	FIB4	Plastid-lipid associated protein PAP / fibrillin family protein
27292459487915	270956707000732	272770175933838	275181083679199			peptidyl-prolyl cis-trans isomerase activity [GO:0003755]	9	0	24.962	51	19.2	17	27.3	26.2	A0A1I9LRJ6	A0A1I9LRJ6	61	At3g60370	Peptidylprolyl isomerase
262739105224609	260024089813232	263341197967529	262790222167969	cell wall modification [GO:0042545];pectin catabolic process [GO:0045490]	integral component of membrane [GO:0016021]	aspartyl esterase activity [GO:0045330];enzyme inhibitor activity [GO:0004857];pectinesterase activity [GO:0030599]	3	0	5.0873	13	3.9	3.9	5.8	3.9	A0A1I9LRM8	A0A1I9LRM8	62	At3g49220	Pectinesterase
253668632507324	256146755218506	25557804107666	259264430999756	nuclear export [GO:0051168]	nucleus [GO:0005634]		14	0	18.154	62	0.5	0.5	0.5	0.5	A0A1I9LRW7	A0A1I9LRW7	63	HST	ARM repeat superfamily protein
NaN	251595020294189	240053882598877	NaN	NAD metabolic process [GO:0019674];NADP biosynthetic process [GO:0006741]	integral component of membrane [GO:0016021]	NAD+ kinase activity [GO:0003951]	12	0	18.96	34	0	2	2.5	0	A0A1I9LRY1	A0A1I9LRY1	64	NADK1	NAD kinase 1
219681415557861	NaN	217240905761719	219647979736328			nucleic acid binding [GO:0003676]	11	0	38.539	49	2.2	0	2.2	2.2	A0A1I9LSC2	A0A1I9LSC2	66	At3g07030	Alba DNA/RNA-binding protein
236600341796875	272448139190674	220759735107422	211704769134521			zinc ion binding [GO:0008270]	143	0	323.31	593	0.8	0.5	0.4	0.5	A0A1I9LSK3	A0A1I9LSK3	67	BIG	Auxin transport protein (BIG)
250056037902832	249916591644287	252713108062744	251567287445068	pectin catabolic process [GO:0045490]		metal ion binding [GO:0046872];pectate lyase activity [GO:0030570]	3	0	6.5644	6	8.1	5.5	5.5	10.7	A0A1I9LSL6	A0A1I9LSL6	68	At3g07010	Pectate lyase
293453025817871	294852561950684	293897094726563	294094486236572		extracellular region [GO:0005576]		21	0	172.86	191	37.4	44.1	58.4	52.1	A0A1I9LT21	A0A1I9LT21	70	EXLA1	Expansin-like A1
272337970733643	280782642364502	NaN	NaN			hydrolase activity [GO:0016787]	6	0	22.168	20	1.3	1.3	0	0	A0A1I9LT44	A0A1I9LT44	71	At3g23540	Alpha/beta-Hydrolases superfamily protein
270063514709473	267125339508057	268830871582031	269220695495605				10	0	7.6887	44	6.9	11.8	7.6	11.6	A0A1I9LT48	A0A1I9LT48	72	CHUP1	Hydroxyproline-rich glycoprotein family protein
248647155761719	249142875671387	244746322631836	248923110961914			ligase activity [GO:0016874]	2	0	3.5848	7	3.4	3.4	3.4	3.4	A0A1I9LTH3	A0A1I9LTH3	75	At3g10250	Histidine-tRNA ligase
273836860656738	270019588470459	275706558227539	273756732940674	metabolic process [GO:0008152]	membrane [GO:0016020]	calcium ion binding [GO:0005509];mannosyl-oligosaccharide 1,2-alpha-mannosidase activity [GO:0004571]	12	0	40.694	93	10.6	14	13.8	15.5	A0A1P8AM79	A0A1P8AM79	78	MNS3	alpha-1,2-Mannosidase
290315475463867	285280570983887	28037633895874	28403039932251	protein retention in Golgi apparatus [GO:0045053];protein targeting to vacuole [GO:0006623]	extrinsic component of membrane [GO:0019898]		6	0	4.3005	33	0.6	0.2	0.7	0.7	A0A1P8AMQ1	A0A1P8AMQ1	79	At1g48090	Calcium-dependent lipid-binding family protein
257554969787598	219730224609375	218590469360352	228119602203369		integral component of membrane [GO:0016021]	oxidoreductase activity, acting on the aldehyde or oxo group of donors, disulfide as acceptor [GO:0016624]	20	0	194.94	58	6.3	5.2	5.2	3.2	A0A1P8AMS1	A0A1P8AMS1	80	At1g21400	Thiamin diphosphate-binding fold (THDP-binding) superfamily protein
245367069244385	241352386474609	NaN	250096664428711	protein transport [GO:0015031]			2	0.00019257	2.8778	2	7.1	11.1	0	7.1	A0A1P8ANA1	A0A1P8ANA1	83	At1g25420	Regulator of Vps4 activity in the MVB pathway protein
282174797058105	278814544677734	27770393371582	278341255187988				8	0	5.5928	39	5.9	9.3	7.4	13.6	A0A1P8ANB4	A0A1P8ANB4	84	SKIP16	SKP1/ASK-interacting protein 16
266581268310547	270267543792725	26979564666748	268548374176025	plant-type cell wall organization [GO:0009664]	cell wall [GO:0005618];extracellular region [GO:0005576];membrane [GO:0016020]		5	0	14.659	32	15	9.3	15	9.3	A0A1P8APG3	A0A1P8APG3	87	EXPA11	Expansin
311407775878906	310005474090576	308824157714844	309137058258057		extracellular space [GO:0005615]		36	0	323.31	524	56.7	56.5	61	58.4	A0A1P8API2	A0A1P8API2	89	SERPIN1	Serine protease inhibitor (SERPIN) family protein
33403751373291	339456748962402	33368278503418	33990406036377	glucose metabolic process [GO:0006006]	integral component of membrane [GO:0016021]	NAD binding [GO:0051287];NADP binding [GO:0050661];oxidoreductase activity, acting on the aldehyde or oxo group of donors, NAD or NADP as acceptor [GO:0016620]	59	0	323.31	584	73.9	74.4	68.3	72.3	A0A1P8APR6	A0A1P8APR6	91	GAPA-2	Glyceraldehyde-3-phosphate dehydrogenase
24521032333374	244220752716064	244485931396484	245876064300537			acyl-CoA hydrolase activity [GO:0047617]	5	0	4.3916	38	13.4	13.4	13.4	13.4	A0A1P8APX5	A0A1P8APX5	96	At1g04290	Thioesterase superfamily protein
246918964385986	246334495544434	236924285888672	245736923217773	regulation of transcription, DNA-templated [GO:0006355]		transcription coregulator activity [GO:0003712]	4	0.0032919	2.0073	15	0.9	0.9	0.4	0.9	A0A1P8AQ03;REV__Q7XJE6	A0A1P8AQ03	98	NRB4	Mediator of RNA polymerase II transcription subunit 15a-like protein
253851852416992	247209854125977	252853507995605	242011260986328			calcium ion binding [GO:0005509]	35	0	211.45	151	3.8	3.6	4.5	1.9	A0A1P8AQ08	A0A1P8AQ08	99	At1g21630	Calcium-binding EF hand family protein
245762901306152	2535205078125	250741863250732	251532917022705				3	0	38.687	23	10.8	7	7	10.8	A0A1P8AQ22	A0A1P8AQ22	100	VAD1	GRAM domain family protein
273191547393799	271413135528564	272014427185059	273333873748779	NAD metabolic process [GO:0019674];NADP biosynthetic process [GO:0006741]		NAD+ kinase activity [GO:0003951]	9	0	22.982	105	28.1	18.1	18.1	18.1	A0A1P8AQ52	A0A1P8AQ52	101	NADK3	NAD(H) kinase 3
237036647796631	242740516662598	241990299224854	256720371246338	mRNA processing [GO:0006397]	nucleus [GO:0005634]	5'-3' exoribonuclease activity [GO:0004534];nucleic acid binding [GO:0003676];zinc ion binding [GO:0008270]	17	0	59.782	78	2	1.6	1.2	6	A0A1P8AQR8	A0A1P8AQR8	103	XRN4	5'-3' exoribonuclease
285169811248779	286846179962158	290277042388916	287336006164551			ADP binding [GO:0043531]	3	0.0060987	1.7106	45	2.1	2.1	2.1	2.1	A0A1P8AQY6	A0A1P8AQY6	104	RFL1	RPS5-like 1
274786167144775	261454601287842	270814170837402	266750564575195				20	0	51.871	57	1.4	4	1.4	1.4	A0A1P8AQY7	A0A1P8AQY7	105	GC5	Golgin Putative 5
NaN	239072895050049	NaN	232314872741699	biosynthetic process [GO:0009058]		catalytic activity [GO:0003824]	2	0	4.3897	9	0	7.6	0	4.1	A0A1P8ARL5	A0A1P8ARL5	111	At1g03210	Phenazine biosynthesis PhzC/PhzF protein
228159713745117	229350814819336	231876583099365	22937650680542			metal ion binding [GO:0046872]	2	0.0052337	1.8084	2	5.7	5.7	5.7	5.7	A0A1P8ARX2	A0A1P8ARX2	113	TAF15	TBP-associated factor 15
256398391723633	259610214233398	NaN	25842924118042				16	0	12.797	38	0.5	0.3	0	0.5	A0A1P8AT16	A0A1P8AT16	117	SPI	BEACH-DOMAIN HOMOLOG A1
24575309753418	250087261199951	247929286956787	250469341278076	regulation of translational initiation [GO:0006446];translational initiation [GO:0006413]	eukaryotic translation initiation factor 2B complex [GO:0005851]	translation initiation factor activity [GO:0003743]	4	0	4.2758	15	2	2	2	2	A0A1P8AT59	A0A1P8AT59	118	At1g53900	Eukaryotic translation initiation factor 2B (eIF-2B) family protein
229606857299805	248223552703857	250198383331299	2452587890625	positive regulation of kinase activity [GO:0033674];regulation of translation [GO:0006417]		protein kinase binding [GO:0019901];protein kinase regulator activity [GO:0019887];ribosome binding [GO:0043022]	105	0	323.31	475	2.1	0.2	0.2	1.9	A0A1P8AT97	A0A1P8AT97	119	ILA	ILITYHIA
NaN	28850700378418	286876583099365	285169811248779	microtubule-based movement [GO:0007018]		ATP binding [GO:0005524];microtubule binding [GO:0008017];microtubule motor activity [GO:0003777]	6	0	6.1011	19	0	0.9	0.9	2.2	A0A1P8ATA6	A0A1P8ATA6	120	At1g63640	p-loop nucleoside triphosphate hydrolases superfamily protein with CH (Calponin Homology) domain-containing protein
347258338928223	351227035522461	351134986877441	350204811096191	rRNA processing [GO:0006364]	cytosol [GO:0005829]	catalytic activity [GO:0003824];RNA binding [GO:0003723]	65	0	323.31	1574	76	77	77	77	A0A1P8ATL2	A0A1P8ATL2	123	CRB	Chloroplast RNA binding protein
307262287139893	308732032775879	309007396697998	309682922363281		cytosol [GO:0005829]	serine-type endopeptidase activity [GO:0004252];serine-type exopeptidase activity [GO:0070008]	55	0	323.31	695	51.3	45.9	41.1	49.6	A0A1P8ATN7	A0A1P8ATN7	124	At1g50380	Prolyl oligopeptidase family protein
267850646972656	270907325744629	271560535430908	271978874206543			RNA binding [GO:0003723]	9	0	27.628	68	11.6	17.6	22.3	21.9	A0A1P8ATW8	A0A1P8ATW8	125	At1g53120	RNA-binding S4 domain-containing protein
278196411132813	274652099609375	286853866577148	288339443206787	retrograde transport, endosome to Golgi [GO:0042147]	cytosol [GO:0005829];GARP complex [GO:0000938]		30	0	127.39	108	2.9	2.8	1.6	2.9	A0A1P8ATX5	A0A1P8ATX5	126	HIT1	Membrane trafficking VPS53 family protein
292450637817383	293912258148193	293912868499756	293131122589111			thiosulfate sulfurtransferase activity [GO:0004792]	18	0	118.19	195	50	64.3	47	60.5	A0A1P8AU99	A0A1P8AU99	128	RDH2	Rhodanese homologue 2
283717308044434	285967979431152	285999565124512	285503940582275				6	0	11.346	35	1.3	1.3	1.3	1.3	A0A1P8AUF8	A0A1P8AUF8	131	At1g23180	ARM repeat superfamily protein
281223316192627	278888454437256	279866333007813	278429012298584	leucine biosynthetic process [GO:0009098]		3-isopropylmalate dehydrogenase activity [GO:0003862];magnesium ion binding [GO:0000287];NAD binding [GO:0051287]	31	0	145.97	106	38.9	36.3	37.5	43.2	A0A1P8AUM8	A0A1P8AUM8	135	IMD3	3-isopropylmalate dehydrogenase
231395397186279	232282161712646	227513999938965	231788578033447				12	0	37.023	23	0.9	0.9	0.9	0.9	A0A1P8AUP4	A0A1P8AUP4	136	At1g27430	GYF domain-containing protein
239079322814941	23854907989502	NaN	240203876495361	protein folding [GO:0006457]		ATP binding [GO:0005524]	2	0.003647	1.9513	6	8.5	8.5	0	8.5	A0A1P8AUX7	A0A1P8AUX7	138	CPN10	Chaperonin 10
269929122924805	NaN	276365089416504	285558528900146	nucleus organization [GO:0006997]	nucleus [GO:0005634]		2	0.0065989	1.6286	12	1.9	0	0.8	0.8	A0A1P8AUZ9	A0A1P8AUZ9	140	LINC2	Nuclear matrix constituent protein-like protein
291557159423828	292043857574463	29110258102417	291493072509766	lipid metabolic process [GO:0006629]		aspartic-type endopeptidase activity [GO:0004190]	31	0	323.31	428	22.8	23.4	32.5	34.8	A0A1P8AV08	A0A1P8AV08	141	APA1	Aspartic proteinase A1
254775981903076	259253101348877	255166816711426	265137481689453		ribosome [GO:0005840]	rRNA binding [GO:0019843];structural constituent of ribosome [GO:0003735];translation elongation factor activity [GO:0003746]	3	0	6.2972	11	13	10.4	10.4	7.4	A0A1P8AV66	A0A1P8AV66	142	At1g64510	Translation elongation factor EF1B/ribosomal protein S6 family protein
225985298156738	234473323822021	255165920257568	267841911315918	intracellular protein transport [GO:0006886];vesicle-mediated transport [GO:0016192]	COPI-coated vesicle membrane [GO:0030663];Golgi membrane [GO:0000139];membrane coat [GO:0030117]	structural molecule activity [GO:0005198]	58	0	323.31	343	4.3	2	0.9	4	A0A1P8AV73	A0A1P8AV73	143	At1g52360	Coatomer subunit beta'
292625522613525	296797790527344	297079029083252	298102779388428	endonucleolytic cleavage of tricistronic rRNA transcript (SSU-rRNA, 5.8S rRNA, LSU-rRNA) [GO:0000479];maturation of SSU-rRNA from tricistronic rRNA transcript (SSU-rRNA, 5.8S rRNA, LSU-rRNA) [GO:0000462]	90S preribosome [GO:0030686];nucleus [GO:0005634]	GTP binding [GO:0005525];GTPase activity [GO:0003924];U3 snoRNA binding [GO:0034511]	7	0	4.122	34	1.5	2.4	2.4	1.5	A0A1P8AVE9	A0A1P8AVE9	145	At1g06720	p-loop containing nucleoside triphosphate hydrolases superfamily protein
260648651123047	260239868164063	262235221862793	256458683013916				7	0.0020348	2.1783	9	2.1	4.2	2.1	2.1	A0A1P8AW11	A0A1P8AW11	149	ATG18H	Autophagy 18h-like protein
244665641784668	241771411895752	NaN	254096336364746	ribosomal large subunit biogenesis [GO:0042273]	nucleolus [GO:0005730];preribosome, large subunit precursor [GO:0030687]		9	0	11.382	23	1.7	1.7	0	1.9	A0A1P8AW47	A0A1P8AW47	150	At1g29320	Transducin/WD40 repeat-like superfamily protein
NaN	241597709655762	242807216644287	239144248962402	microtubule severing [GO:0051013]	cytoplasm [GO:0005737];katanin complex [GO:0008352];microtubule [GO:0005874]	microtubule binding [GO:0008017]	2	0.0022157	2.1462	6	0	1	1	1	A0A1P8AW69	A0A1P8AW69	151	At1g11160	Katanin p80 WD40 repeat-containing subunit B1 homolog
275596866607666	268524570465088	252760772705078	269584789276123	phosphatidylinositol phosphorylation [GO:0046854];phosphatidylinositol-mediated signaling [GO:0048015]		kinase activity [GO:0016301]	25	0	61.416	88	0.9	1.7	3.4	0.8	A0A1P8AWA3	A0A1P8AWA3	153	ATPI4K ALPHA	Phosphatidylinositol 3-and 4-kinase family protein
253742790222168	258967990875244	258247604370117	263760871887207		chloroplast [GO:0009507]	ATP binding [GO:0005524];hydrolase activity [GO:0016787]	7	0	4.8324	21	5.4	8.8	8.8	4.3	A0A1P8AWP1	A0A1P8AWP1	157	At1g73170	p-loop containing nucleoside triphosphate hydrolases superfamily protein
NaN	257207508087158	25385217666626	254387607574463				7	0	4.8432	8	3.8	14.9	3.8	11.5	A0A1P8AWP9	A0A1P8AWP9	158	At1g31500	DNAse I-like superfamily protein
255379810333252	250207271575928	253366069793701	253327560424805				5	0	8.1764	27	3.3	3.3	11.1	11.1	A0A1P8AWV1	A0A1P8AWV1	162	YUP8H12R.14	Nitrobindin heme-binding domain protein
336782913208008	336321182250977	337188606262207	33594123840332				48	0	323.31	964	70.4	71.2	73	72.2	A0A1P8AWX3;O48705	A0A1P8AWX3	163	At1g33590	Leucine-rich repeat (LRR) family protein
264800968170166	261925163269043	261661281585693	264540958404541			sirohydrochlorin cobaltochelatase activity [GO:0016852]	5	0	16.361	28	25.5	25.5	19.4	25.5	A0A1P8AWY5	A0A1P8AWY5	164	SIRB	Sirohydrochlorin ferrochelatase B
280215225219727	281946029663086	27408597946167	276977653503418		chloroplast [GO:0009507]		6	0	23.932	39	26.8	17.9	26.8	17.9	A0A1P8AX61	A0A1P8AX61	166	At2g01755	Uncharacterized protein
266093578338623	272083435058594	269414539337158	267394390106201	DNA repair [GO:0006281]		class I DNA-(apurinic or apyrimidinic site) endonuclease activity [GO:0140078];DNA binding [GO:0003677];endonuclease activity [GO:0004519];metal ion binding [GO:0046872]	5	0	8.3443	33	7	3.6	5.9	7	A0A1P8AX84	A0A1P8AX84	167	ARP	DNA-(apurinic or apyrimidinic site) lyase
22240104675293	NaN	222023963928223	226554756164551	proteasome assembly [GO:0043248]		molecular adaptor activity [GO:0060090]	62	0	289.7	243	1	0	2.2	1.1	A0A1P8AX98	A0A1P8AX98	168	At2g26780	ARM repeat superfamily protein
2497727394104	246221523284912	250558547973633	251547985076904				4	0.00038234	2.7554	17	5.7	8.6	5.7	5.7	A0A1P8AXA5	A0A1P8AXA5	169	MEE18	Maternal effect embryo arrest 18
258395404815674	246656284332275	259422817230225	262494144439697			ATP binding [GO:0005524];helicase activity [GO:0004386];nucleic acid binding [GO:0003676]	9	0	24.185	57	4	1.1	3	4.3	A0A1P8AXM2	A0A1P8AXM2	170	At2g35920	RNA helicase family protein
294718704223633	295366401672363	296340351104736	296195392608643	NAD biosynthetic process [GO:0009435]		nicotinate phosphoribosyltransferase activity [GO:0004516];nicotinate-nucleotide diphosphorylase (carboxylating) activity [GO:0004514]	29	0	133.78	285	38.8	46.3	41.2	46.7	A0A1P8AXW4	A0A1P8AXW4	172	NAPRT2	Nicotinate phosphoribosyltransferase
NaN	218658199310303	200896472930908	221779766082764	translation [GO:0006412]	ribosome [GO:0005840]	structural constituent of ribosome [GO:0003735]	38	0	263.13	301	0	7.8	6.9	11.1	A0A1P8AY36	A0A1P8AY36	174	At2g34480	Ribosomal protein L18ae/LX family protein
239431533813477	240395908355713	244366970062256	239001197814941				3	0	3.2767	17	3.1	4.5	4.5	6.3	A0A1P8AY74	A0A1P8AY74	175	Basic Proline-rich Protein 1	Flocculation FLO11-like protein
233994998931885	233713245391846	NaN	NaN	regulation of transcription, DNA-templated [GO:0006355]		histone binding [GO:0042393]	3	0	4.3345	9	7.8	3.9	3.9	3.9	A0A1P8AYM4	A0A1P8AYM4	178	AL6	Alfin-like 6
28716890335083	287901096343994	299600276947021	286400318145752				12	0	62.508	85	30.3	38.2	38.2	37.5	A0A1P8AYM6	A0A1P8AYM6	179	At2g29320	NAD(P)-binding Rossmann-fold superfamily protein
257444000244141	256101760864258	2619873046875	261039352416992	intracellular protein transport [GO:0006886];vesicle-mediated transport [GO:0016192]	clathrin adaptor complex [GO:0030131]		8	0	33.699	32	2.3	4.4	6.5	4.4	A0A1P8AYQ6	A0A1P8AYQ6	180	At2g20790	Clathrin adaptor complexes medium subunit family protein
NaN	260490970611572	261579608917236	261388359069824	protein secretion [GO:0009306]	integral component of plasma membrane [GO:0005887]		1	0.004717	1.8704	2	0	0.4	0.4	0.4	A0A1P8AYW3	A0A1P8AYW3	181	emb2410	Embryo defective 2410
31380407333374	31370153427124	311384601593018	313352737426758	protoporphyrinogen IX biosynthetic process [GO:0006782];uroporphyrinogen III biosynthetic process [GO:0006780]		uroporphyrinogen-III synthase activity [GO:0004852]	24	0	233.65	251	52.5	52.5	52.5	53.2	A0A1P8AZK1	A0A1P8AZK1	185	HEMD	Uroporphyrinogen-III synthase
249725933074951	252520885467529	248503837585449	250447273254395		integral component of membrane [GO:0016021]		5	0	5.2472	7	11.6	12.2	4.8	7.5	A0A1P8AZP4	A0A1P8AZP4	186	TBL45	TRICHOME BIREFRINGENCE-LIKE 45
28439323425293	281197624206543	28220573425293	NaN		nucleus [GO:0005634]	DNA-binding transcription factor activity [GO:0003700];sequence-specific DNA binding [GO:0043565]	1	0.00038256	2.7661	6	6	6	6	0	A0A1P8AZP8	A0A1P8AZP8	188	WRKY55	WRKY DNA-binding protein 55
NaN	247852649688721	NaN	241858596801758			DNA binding [GO:0003677];metal ion binding [GO:0046872]	9	0	7.7672	32	0	0.6	0	0.6	A0A1P8B1D0	A0A1P8B1D0	195	NERD	GW repeat-and PHD finger-containing protein NERD
276561508178711	277875576019287	283126792907715	281669597625732			ureidoglycolate hydrolase activity [GO:0004848]	6	0	46.578	55	27.7	23.8	23.8	23.8	A0A1P8B223	A0A1P8B223	200	At2g35820	Ureidoglycolate hydrolase
318753280639648	303506851196289	304289207458496	306121921539307			peptidyl-prolyl cis-trans isomerase activity [GO:0003755]	16	0	215.21	217	49.7	47.9	49.7	49.7	A0A1P8B252	A0A1P8B252	201	At2g43560	Peptidylprolyl isomerase
278228054046631	277297477722168	224475326538086	NaN				29	0	16.624	16	32.1	34.5	34.5	31.8	A0A1P8B345	A0A1P8B345	209	UXS6	UDP-XYL synthase 6
254339942932129	25472339630127	257272052764893	259902305603027	intracellular protein transport [GO:0006886];vesicle-mediated transport [GO:0016192]	clathrin adaptor complex [GO:0030131]		40	0	27.726	54	10.6	4.9	8.1	6	A0A1P8B3B6	A0A1P8B3B6	210	At4g23460	Beta-adaptin-like protein
267197322845459	26720645904541	269992713928223	268633689880371	signal transduction [GO:0007165]		ADP binding [GO:0043531]	23	0	19.189	61	8.7	9.3	10	9.6	A0A1P8B3F3	A0A1P8B3F3	212	RPP5	Disease resistance protein (TIR-NBS-LRR class) family
258753490447998	262727546691895	258183631896973	258966369628906	response to abscisic acid [GO:0009737]			4	0	3.9966	8	3.1	3.1	3.1	3.1	A0A1P8B3K6	A0A1P8B3K6	213	At4g25580	CAP160 protein
2674560546875	266616649627686	267636985778809	265575847625732		endoplasmic reticulum membrane [GO:0005789];integral component of membrane [GO:0016021]	flavin adenine dinucleotide binding [GO:0050660];FMN binding [GO:0010181];NADP binding [GO:0050661];NADPH-hemoprotein reductase activity [GO:0003958]	18	0	24.915	74	8.5	9.6	11.6	16	A0A1P8B3S1	A0A1P8B3S1	215	ATR2	NADPH--cytochrome P450 reductase
302809600830078	302202033996582	301128444671631	303400039672852	carbohydrate metabolic process [GO:0005975]		hydrolase activity, hydrolyzing O-glycosyl compounds [GO:0004553]	21	0	323.31	588	46	36.2	42.2	41.3	A0A1P8B3U2	A0A1P8B3U2	216	At4g16260	Glycosyl hydrolase superfamily protein
246973152160645	246869373321533	246426773071289	NaN				5	0	5.8976	26	10.6	4.5	10.6	0	A0A1P8B3Z7	A0A1P8B3Z7	217	RRP41L	3'-5'-exoribonuclease family protein
254006080627441	251219062805176	252643489837646	250438938140869				3	0	5.007	20	8	5.6	8	5.3	A0A1P8B441	A0A1P8B441	219	At4g15450	Senescence/dehydration-associated protein-like protein
316553993225098	315862503051758	316818981170654	318203506469727	protein import [GO:0017038];protein targeting [GO:0006605]	membrane [GO:0016020]	ATP binding [GO:0005524]	88	0	323.31	867	54.6	57.1	56.7	53.8	A0A1P8B485	A0A1P8B485	222	AGY1	Protein translocase subunit SecA
253881454467773	249026527404785	239393920898438	244925899505615	transcription, DNA-templated [GO:0006351]		chromatin binding [GO:0003682]	6	0.0052365	1.8158	21	6.1	5.9	4.1	1.4	A0A1P8B497	A0A1P8B497	223	At4g11560	Bromo-adjacent homology (BAH) domain-containing protein
26029390335083	254529342651367	255126190185547	255185127258301		90S preribosome [GO:0030686];nucleolus [GO:0005730];small-subunit processome [GO:0032040]		7	0.0057627	1.7656	14	0.9	0.9	0.3	0.3	A0A1P8B4E4	A0A1P8B4E4	224	At4g30990	ARM repeat superfamily protein
NaN	249195709228516	251248664855957	25965763092041			ATP binding [GO:0005524];hydrolase activity [GO:0016787];protein kinase activity [GO:0004672]	3	0.0043628	1.8973	5	0	1.2	1.2	1.2	A0A1P8B5B9	A0A1P8B5B9	229	At4g31230	Kinase with adenine nucleotide alpha hydrolases-like domain-containing protein
NaN	NaN	257834434509277	258792572021484			hydrolase activity [GO:0016787]	3	0	23.399	22	0	0	6	6	A0A1P8B5J8	A0A1P8B5J8	231	At4g03610	Metallo-hydrolase/oxidoreductase superfamily protein
NaN	293632335662842	28653829574585	290517292022705				7	0	32.23	14	0	5.2	5.2	5.2	A0A1P8B5Y3	A0A1P8B5Y3	233	SEN1	Rhodanese/Cell cycle control phosphatase superfamily protein
24909122467041	249320201873779	250325469970703	247753505706787			peptidyl-prolyl cis-trans isomerase activity [GO:0003755]	2	0.00057252	2.7189	10	8.1	14.3	14.3	14.3	A0A1P8B637	A0A1P8B637	234	At4g26555	Peptidylprolyl isomerase
263782043457031	263386154174805	266666851043701	266285362243652	cell wall organization [GO:0071555]	cell wall [GO:0005618];extracellular region [GO:0005576];integral component of membrane [GO:0016021]	hydrolase activity [GO:0016787]	6	0	22.917	60	11.8	8.1	11.8	11.8	A0A1P8B651	A0A1P8B651	235	PAE8	Pectin acetylesterase
317028102874756	31622875213623	315304126739502	317120265960693		cytoplasm [GO:0005737]	metal ion binding [GO:0046872];metalloaminopeptidase activity [GO:0070006]	49	0	323.31	746	67.9	53.8	62.4	59.2	A0A1P8B667	A0A1P8B667	236	APP1	Aminopeptidase P1
NaN	NaN	251844997406006	252109661102295	dTMP biosynthetic process [GO:0006231];methylation [GO:0032259];one-carbon metabolic process [GO:0006730];tetrahydrofolate biosynthetic process [GO:0046654]		dihydrofolate reductase activity [GO:0004146];thymidylate synthase activity [GO:0004799]	11	0	24.872	25	1.9	1.9	5.4	3.7	A0A1P8B676	A0A1P8B676	237	THY-2	Bifunctional dihydrofolate reductase-thymidylate synthase
253123321533203	242786674499512	244205341339111	245725936889648	deoxyribonucleoside triphosphate catabolic process [GO:0009204];nucleotide metabolic process [GO:0009117]	cytoplasm [GO:0005737]	dTTP diphosphatase activity [GO:0036218];metal ion binding [GO:0046872];NADH pyrophosphatase activity [GO:0035529];nucleotide binding [GO:0000166]	2	0.00094447	2.5479	13	5.5	5.5	5.5	5.5	A0A1P8B687	A0A1P8B687	238	At4g13720	Inosine triphosphate pyrophosphatase
NaN	250199222564697	NaN	250668983459473			ATP binding [GO:0005524];protein kinase activity [GO:0004672]	7	0.0036463	1.9459	4	1.4	5.6	2.9	5.6	A0A1P8B6A6	A0A1P8B6A6	239	At4g10730	Protein kinase superfamily protein
242419815063477	NaN	232012310028076	NaN	CTP biosynthetic process [GO:0006241];'de novo' CTP biosynthetic process [GO:0044210];glutamine metabolic process [GO:0006541];pyrimidine nucleobase biosynthetic process [GO:0019856]		ATP binding [GO:0005524];CTP synthase activity [GO:0003883];identical protein binding [GO:0042802]	15	0	29.353	68	9.9	2.4	5.7	0	A0A1P8B6F9	A0A1P8B6F9	240	At4g02120	CTP synthase
280887641906738	27482084274292	274379348754883	275757141113281	defense response [GO:0006952]	extracellular region [GO:0005576]	kinase activity [GO:0016301]	7	0	17.229	24	22.2	22.2	17.7	22.2	A0A1P8B6P8	A0A1P8B6P8	243	At4g18253	Receptor Serine/Threonine kinase-like protein
254919776916504	236843166351318	25826847076416	253839664459229				12	0	24.613	48	2	2.5	3.1	1.8	A0A1P8B770	A0A1P8B770	246	G2484-1	G2484-1 protein
243948631286621	23360782623291	237110385894775	23617956161499			oxidoreductase activity [GO:0016491]	2	0.00019283	2.9064	11	6.2	2.2	6.2	6.2	A0A1P8B7E6	A0A1P8B7E6	248	At4g32360	Pyridine nucleotide-disulfide oxidoreductase family protein
249606246948242	249923934936523	NaN	252019481658936	ER-associated misfolded protein catabolic process [GO:0071712];ubiquitin-dependent ERAD pathway [GO:0030433]	VCP-NPL4-UFD1 AAA ATPase complex [GO:0034098]	polyubiquitin modification-dependent protein binding [GO:0031593]	11	0	51.34	35	1.3	1.3	0	1.3	A0A1P8B7F5	A0A1P8B7F5	249	At4g15420	Ubiquitin fusion degradation UFD1 family protein
246442184448242	242699222564697	243297824859619	25281852722168	polysaccharide catabolic process [GO:0000272]		amylopectin maltohydrolase activity [GO:0102229];beta-amylase activity [GO:0016161]	8	0	12.938	24	4.9	1.8	4.9	4.9	A0A1P8B7H0	A0A1P8B7H0	251	BAM5	Beta-amylase
290811634063721	291031703948975	291861953735352	290717334747314				15	0	59.973	111	28.6	25.5	32.7	31.1	A0A1P8B7H4	A0A1P8B7H4	252	At4g20750	NAD(P)-binding Rossmann-fold superfamily protein
273752574920654	273881282806396	277515563964844	262643489837646			RNA binding [GO:0003723]	1	0.0095137	1.4976	40	1.2	1.2	1.2	1.2	A0A1P8B7L2	A0A1P8B7L2	253	At4g29750	CRS1 / YhbY (CRM) domain-containing protein
260889358520508	262360248565674	261851978302002	264082736968994			metal ion binding [GO:0046872];oxidoreductase activity [GO:0016491]	3	0	3.8097	27	8.5	3	3	3	A0A1P8B7P9	A0A1P8B7P9	256	At4g16765	2-oxoglutarate (2OG) and Fe(II)-dependent oxygenase superfamily protein
286555023193359	275919208526611	283185081481934	282392711639404	RNA processing [GO:0006396]		RNA binding [GO:0003723];RNA methyltransferase activity [GO:0008173]	12	0	8.1502	39	1.1	0.5	1.1	1.1	A0A1P8B7Z4	A0A1P8B7Z4	259	At4g17610	tRNA/rRNA methyltransferase (SpoU) family protein
263391761779785	263208255767822	264448547363281	266551265716553	xylan catabolic process [GO:0045493]	cell wall [GO:0005618]	endo-1,4-beta-xylanase activity [GO:0031176]	8	0	12.76	30	9	6	13.5	16.7	A0A1P8B8F8	A0A1P8B8F8	261	XYN5	Endo-1,4-beta-xylanase 5
235702209472656	238131351470947	NaN	234641342163086		integral component of membrane [GO:0016021]	ATP binding [GO:0005524];protein kinase activity [GO:0004672]	3	0.0014859	2.2704	6	2.8	1.1	0	1.1	A0A1P8B8L9	A0A1P8B8L9	263	EMB1290	Cysteine-rich receptor-like protein kinase 17
314917106628418	316718559265137	316479167938232	316515140533447				82	0	323.31	798	47	43.9	47	48.4	A0A1P8B8R9	A0A1P8B8R9	265	At4g16660	Heat shock protein 70 (Hsp 70) family protein
289707622528076	28701208114624	288311367034912	28811824798584				11	0	66.625	104	14.8	19.5	16.9	20.7	A0A1P8B9A7	A0A1P8B9A7	267	CYL1	Alpha-N-acetylglucosaminidase family / NAGLU family
252909851074219	258565006256104	260980434417725	258622817993164				12	0	3.8657	26	5.2	6.8	2.5	3.6	A0A1P8B9J5	A0A1P8B9J5	270	MFC19.17	RNI-like superfamily protein
315904502868652	314312152862549	313420734405518	315595588684082	carboxylic acid metabolic process [GO:0019752]		transferase activity, transferring acyl groups, acyl groups converted into alkyl on transfer [GO:0046912]	49	0	323.31	374	69.5	58.4	59.7	59.6	A0A1P8B9L6	A0A1P8B9L6	271	MAM1	Methylthioalkylmalate synthase 1
297007789611816	293173446655273	306402206420898	307585144042969			peptidyl-prolyl cis-trans isomerase activity [GO:0003755]	16	0	253.23	152	47.9	48.6	49.7	49.7	A0A1P8B9P2	A0A1P8B9P2	272	At5g35100	Cyclophilin-like peptidyl-prolyl cis-trans isomerase family protein
NaN	21950309753418	217741851806641	NaN	negative regulation of translation [GO:0017148];nuclear-transcribed mRNA poly(A) tail shortening [GO:0000289];regulation of transcription, DNA-templated [GO:0006355]	CCR4-NOT core complex [GO:0030015];host cell nucleus [GO:0042025];nucleus [GO:0005634];P-body [GO:0000932]	poly(A)-specific ribonuclease activity [GO:0004535]	13	0	81.647	57	0	1.2	1.2	0	A0A1P8B9R0	A0A1P8B9R0	273	MRG7.19	Transcription regulator NOT2/NOT3/NOT5 family protein
304718894958496	305886192321777	304017181396484	304233207702637	glucan catabolic process [GO:0009251]		beta-glucosidase activity [GO:0008422]	27	0	240.32	273	36.2	36.5	38.9	38.9	A0A1P8B9U3	A0A1P8B9U3	274	At5g04885	Glycosyl hydrolase family protein
23580493927002	23859655380249	238398056030273	239450302124023				3	0.00057307	2.74	8	1.7	1.7	1.7	1.7	A0A1P8BA79	A0A1P8BA79	276	TAF5	TBP-associated factor 5
253623561859131	252395439147949	254671230316162	252222518920898	proteasome regulatory particle assembly [GO:0070682]	cytoplasm [GO:0005737];nucleus [GO:0005634];proteasome complex [GO:0000502]		7	0	70.19	37	12.5	7.4	5.1	5.1	A0A1P8BA81	A0A1P8BA81	277	MTI20.21	26S proteasome regulatory subunit
307211017608643	306632270812988	301645889282227	300498600006104				17	0	176	142	42.5	53.3	40.5	46.7	A0A1P8BAQ0	A0A1P8BAQ0	279	MNC6.3	Tetratricopeptide repeat (TPR)-like superfamily protein
271017932891846	270053882598877	269178657531738	268792343139648			heme binding [GO:0020037];metal ion binding [GO:0046872]	8	0	8.2796	39	21.4	30.4	21.4	26.8	A0A1P8BAR6	A0A1P8BAR6	280	RLF	Reduced lateral root formation
309810085296631	308872909545898	310417251586914	310312442779541	carbohydrate metabolic process [GO:0005975]		carbohydrate binding [GO:0030246];hydrolase activity, hydrolyzing O-glycosyl compounds [GO:0004553]	61	0	301.97	588	30.4	28.5	25.4	29.7	A0A1P8BAU5	A0A1P8BAU5	282	RSW3	Glycosyl hydrolases family 31 protein
240665283203125	240491809844971	NaN	242042636871338				1	0	3.9268	12	3.6	3.6	3.6	3.6	A0A1P8BAY4	A0A1P8BAY4	283	RUG3	Regulator of chromosome condensation (RCC1) family protein
307624015808105	30802318572998	3074831199646	3059450340271	L-methionine salvage from methylthioadenosine [GO:0019509];L-methionine salvage from S-adenosylmethionine [GO:0019284]	cytoplasm [GO:0005737]	2,3-diketo-5-methylthiopentyl-1-phosphate enolase activity [GO:0043715];2-hydroxy-3-keto-5-methylthiopentenyl-1-phosphate phosphatase activity [GO:0043716];acireductone synthase activity [GO:0043874];magnesium ion binding [GO:0000287];methylthioribulose 1-phosphate dehydratase activity [GO:0046570];zinc ion binding [GO:0008270]	39	0	323.31	552	50.7	49.1	47.2	44.2	A0A1P8BAY5	A0A1P8BAY5	284	DEP1	Probable bifunctional methylthioribulose-1-phosphate dehydratase/enolase-phosphatase E1
309165573120117	307349739074707	307382793426514	311546039581299			catalytic activity [GO:0003824]	28	0	296.3	293	45	46.3	54.5	53.7	A0A1P8BB43	A0A1P8BB43	285	MDJ22.4	Phosphoglycerate/bisphosphoglycerate mutase family protein
250368690490723	267513637542725	266090774536133	261085891723633			RNA binding [GO:0003723]	13	0	26.302	53	1.7	13.3	8.6	9.8	A0A1P8BBW1	A0A1P8BBW1	292	At5g15270	RNA-binding KH domain-containing protein
245681343078613	272293109893799	250288848876953	274128036499023	intracellular protein transport [GO:0006886]	nucleus [GO:0005634]	Ran GTPase binding [GO:0008536]	21	0	49.863	89	2.8	1	2.8	1	A0A1P8BC62	A0A1P8BC62	294	At5g06120	ARM repeat superfamily protein
261527118682861	258343410491943	257593879699707	256638641357422	pentose-phosphate shunt, non-oxidative branch [GO:0009052]		ribose-5-phosphate isomerase activity [GO:0004751];transferase activity [GO:0016740]	4	0	25.575	26	11.3	11.3	11.3	11.3	A0A1P8BDP5	A0A1P8BDP5	299	MFC16.20	NagB/RpiA/CoA transferase-like superfamily protein
272255458831787	273263740539551	273839340209961	27109188079834	chloroplast accumulation movement [GO:0009904];microtubule-based movement [GO:0007018]		ATP binding [GO:0005524];microtubule binding [GO:0008017];microtubule motor activity [GO:0003777]	35	0	42.543	87	14.7	17.2	16.4	17.5	A0A1P8BDP7	A0A1P8BDP7	300	KAC2	Kinesin like protein for actin based chloroplast movement 2
263439273834229	264468269348145	263890476226807	264526977539063	galactose metabolic process [GO:0006012]	integral component of membrane [GO:0016021]	UDP-glucose 4-epimerase activity [GO:0003978]	5	0.00075945	2.6097	8	2.4	2.4	2.4	2.4	A0A1P8BDS3	A0A1P8BDS3	301	DUR	NAD(P)-binding Rossmann-fold superfamily protein
279640560150146	28643648147583	284941158294678	283199310302734		anaphase-promoting complex [GO:0005680];integral component of membrane [GO:0016021]	ligase activity [GO:0016874]	8	0	5.7995	33	2.3	2.3	1.5	1.9	A0A1P8BDT7	A0A1P8BDT7	303	EMB2771	E3 ubiquitin ligase
256828174591064	270233745574951	257349510192871	252335224151611				23	0	34.147	69	3.1	1	3.4	1.2	A0A1P8BDV1	A0A1P8BDV1	304	MQJ2.5	Tetratricopeptide repeat (TPR)-like superfamily protein
227633647918701	NaN	222995262145996	NaN	protein targeting to peroxisome [GO:0006625]	peroxisomal membrane [GO:0005778]	ATP binding [GO:0005524];ATPase activity [GO:0016887]	5	0	3.5945	19	0.8	0.8	0.8	0	A0A1P8BDY2	A0A1P8BDY2	305	PEX1	Peroxisome 1
261002712249756	25825366973877	NaN	26366662979126		integral component of membrane [GO:0016021]		12	0	20.156	39	1.5	1.5	0	2.5	A0A1P8BE11	A0A1P8BE11	306	At5g52580	RabGAP/TBC domain-containing protein
24888879776001	248616905212402	248614540100098	247429885864258			nucleic acid binding [GO:0003676]	4	0	4.3746	5	1.2	1.2	1.2	1.2	A0A1P8BE91	A0A1P8BE91	307	SDN3	Small RNA degrading nuclease 3
269616832733154	271139621734619	267615451812744	26930778503418				12	0	29.729	73	9.8	8.6	9.1	13.6	A0A1P8BEF2	A0A1P8BEF2	308	At5g67385	Phototropic-responsive NPH3 family protein
24582103729248	257346153259277	25847806930542	258012676239014			transferase activity [GO:0016740]	9	0	7.5419	13	1.7	2.7	2.7	2.7	A0A1P8BER5	A0A1P8BER5	311	MKP11.12	Protein prenylyltransferase superfamily protein
286913909912109	297757568359375	286990242004395	289641933441162		chloroplast [GO:0009507]	isomerase activity [GO:0016853]	13	0	23.986	82	30.5	32	30.5	28.7	A0A1P8BEU1	A0A1P8BEU1	313	At5g27390	Tagatose-6-phosphate ketose/aldose isomerase, putative (Mog1/PsbP/DUF1795-like photosystem II reaction center PsbP family protein)
253122634887695	256101760864258	258368721008301	251264839172363			peptide-methionine (S)-S-oxide reductase activity [GO:0008113]	8	0	45.428	21	24	26.6	36.7	30.1	A0A1P8BF28	A0A1P8BF28	314	PMSR1	Peptidemethionine sulfoxide reductase 1
299673290252686	301451587677002	300589179992676	302176647186279			ATP binding [GO:0005524]	102	0	323.31	289	77.1	75.5	76.2	72.2	A0A1P8BF32	A0A1P8BF32	315	BIP2	Heat shock protein 70 (Hsp 70) family protein
280088119506836	263543224334717	257040348052979	257757034301758				15	0	26.442	50	0.9	2.1	2.6	2.8	A0A1P8BF80	A0A1P8BF80	316	MPO12.6	Tudor/PWWP/MBT superfamily protein
296682415008545	29851921081543	299134216308594	300049076080322			GTP binding [GO:0005525];GTPase activity [GO:0003924];metal ion binding [GO:0046872];translation elongation factor activity [GO:0003746];translation initiation factor activity [GO:0003743]	5	0	5.2597	15	1.4	1.4	1.4	2.8	A0A1P8BFE6	A0A1P8BFE6	318	At5g10630	Translation elongation factor EF1A/initiation factor IF2gamma family protein
257821674346924	259806976318359	266210079193115	255121669769287	mannose metabolic process [GO:0006013]		alpha-mannosidase activity [GO:0004559];carbohydrate binding [GO:0030246];metal ion binding [GO:0046872]	2	0	7.6747	42	2.5	1.6	1.6	1.6	A0A1P8BFL6	A0A1P8BFL6	320	At5g66150	Alpha-mannosidase
340568199157715	339711723327637	338959083557129	340860710144043				42	0	323.31	765	69.2	69.2	69.2	69.2	A0A1P8BG37	A0A1P8BG37	324	HCF136	Photosystem II stability/assembly factor, chloroplast (HCF136)
315235118865967	315552215576172	316055393218994	315778579711914	carbohydrate metabolic process [GO:0005975]		intramolecular transferase activity, phosphotransferases [GO:0016868]	44	0	323.31	605	69.9	70.1	71.2	69.9	A0A1P8BGJ0	A0A1P8BGJ0	327	At5g17530	Phosphoglucosamine mutase family protein
248242511749268	263089351654053	2585910987854	265988922119141	signal transduction [GO:0007165]		ADP binding [GO:0043531]	12	0	10.69	32	4.6	2.2	1.1	2.2	A0A1P8BGN6	A0A1P8BGN6	328	At5g45210	Disease resistance protein (TIR-NBS-LRR class) family
25199254989624	25091157913208	2531565284729	253265285491943	microtubule-based movement [GO:0007018]	microtubule [GO:0005874]	ATP binding [GO:0005524];microtubule binding [GO:0008017];microtubule motor activity [GO:0003777]	4	0.006758	1.6032	6	2.4	1.1	1.1	1.1	A0A1P8BGR0	A0A1P8BGR0	329	At5g06670	Kinesin-like protein
262749938964844	258379783630371	256560287475586	257666339874268				3	0	3.2153	8	5.5	9.1	9.1	9.1	A0A1P8BGX1	A0A1P8BGX1	330	At5g27710	T-box protein
248363418579102	247491912841797	240563106536865	244637603759766		nuclear pore [GO:0005643]		20	0	36.305	67	1.1	1.1	1.1	1.1	A0A1P8BGZ1	A0A1P8BGZ1	331	EMB3142	Nuclear pore complex protein (DUF3414)
NaN	239345417022705	244790191650391	238234729766846			electron transfer activity [GO:0009055]	4	0	3.5323	11	0	2.5	6.9	4.4	A0A1P8BGZ7	A0A1P8BGZ7	332	ENODL1	Early nodulin-like protein 1
277763061523438	263997116088867	264675445556641	26533130645752				2	0	5.5088	5	8	8	8	8	A0A1R7T377	A0A1R7T377	337	At5g27560	DUF1995 domain protein, putative (DUF1995)
274554443359375	274977741241455	277118129730225	27615966796875		mitochondrial matrix [GO:0005759]	electron transfer activity [GO:0009055]	13	0	88.754	112	23.4	36.5	29.1	34.4	A0A1R7T3K7	A0A1R7T3K7	339	ETFBETA	Electron transfer flavoprotein subunit beta
NaN	NaN	243498268127441	247265033721924		apoplast [GO:0048046]		2	0	6.5675	14	0	0	4.4	4.4	A0A2H1ZE31	A0A2H1ZE31	340	ESB1	Dirigent protein
369545860290527	36828800201416	369734191894531	36810001373291	glycine catabolic process [GO:0006546]	mitochondrion [GO:0005739]	aminomethyltransferase activity [GO:0004047];transaminase activity [GO:0008483]	70	0	323.31	2772	87.7	87.7	83	87.7	A0A2H1ZEA9	A0A2H1ZEA9	341	At1g11860	Aminomethyltransferase
NaN	258655891418457	250728778839111	259864177703857	translation [GO:0006412]	mitochondrion [GO:0005739];ribosome [GO:0005840]	RNA binding [GO:0003723];structural constituent of ribosome [GO:0003735]	16	0	92.14	66	0	1.3	3.4	1.3	A0A2P2CLF3	A0A2P2CLF3	347	rps3	Ribosomal protein S3
319640274047852	320518379211426	320857543945313	321365356445313	ATP synthesis coupled proton transport [GO:0015986]	mitochondrion [GO:0005739];proton-transporting ATP synthase complex, catalytic core F(1) [GO:0045261]	ATP binding [GO:0005524];proton-transporting ATP synthase activity, rotational mechanism [GO:0046933]	45	0	323.31	790	46.2	53.1	49.1	49.1	A0A2P2CLF9	A0A2P2CLF9	350	atp1	ATP synthase subunit alpha
259306221008301	250883693695068	249818954467773	254492530822754	regulation of RNA splicing [GO:0043484]	nucleoplasm [GO:0005654];ribonucleoprotein complex [GO:1990904];ribosome [GO:0005840]	RNA binding [GO:0003723]	5	0	11.084	17	15.4	20.6	11.4	11.4	A0JQ00	A0JQ00	353	At5g02740	At5g02740
287522258758545	289946403503418	290594596862793	29175931930542		cell wall [GO:0005618];vacuole [GO:0005773]		6	0	276.22	135	35.1	44	44	40	A0JQ12	A0JQ12	354	At1g76020	At1g76020
305769577026367	307367477416992	307237071990967	307192268371582	D-ribose catabolic process [GO:0019303];nucleoside metabolic process [GO:0009116]	chloroplast [GO:0009507];chloroplast nucleoid [GO:0042644];chloroplast stroma [GO:0009570];nucleus [GO:0005634];plastid nucleoid [GO:0042646]	ATP binding [GO:0005524];metal ion binding [GO:0046872];ribokinase activity [GO:0004747]	23	0	308	304	45.6	43.5	51.2	55.1	A1A6H3	A1A6H3	355	RBSK	Ribokinase
242636318206787	NaN	NaN	248034114837646		chloroplast stroma [GO:0009570]	ATP binding [GO:0005524];ATPase activity [GO:0016887]	5	0	5.257	19	4.6	1.5	1.5	6.6	A1L4Y1	A1L4Y1	357	GET3B	ATPase GET3B
314403533935547	315010929107666	314217166900635	314368839263916	cellular response to oxidative stress [GO:0034599];response to high light intensity [GO:0009644]	cytoplasm [GO:0005737];cytosol [GO:0005829];plastid [GO:0009536]	AU-rich element binding [GO:0017091];NADPH:quinone reductase activity [GO:0003960]	32	0	318.16	453	39.7	51.5	61.3	61.3	A1L4Y4	A1L4Y4	358	At5g61510	At5g61510
282834796905518	282126178741455	281485576629639	280149421691895	heat acclimation [GO:0010286];negative regulation of gene silencing [GO:0060969];regulation of cellular response to heat [GO:1900034];regulation of mitotic chromosome decondensation [GO:1901651];response to heat [GO:0009408]	chromocenter [GO:0010369];nucleolus [GO:0005730]		22	0	96.737	151	22.4	24.7	21.9	30	A2RVJ8	A2RVJ8	359	HIT4	Protein HEAT INTOLERANT 4
244380950927734	245013637542725	253094902038574	252086601257324	RNA processing [GO:0006396]	cytoplasm [GO:0005737];nuclear exosome (RNase complex) [GO:0000176];plastid [GO:0009536]	RNA binding [GO:0003723]	6	0	7.9096	22	5.2	9.4	4.2	9.4	A2RVT9	A2RVT9	362	At5g38890	AT5G38890 protein
290162715911865	289725437164307	289577045440674	289118232727051				16	0	102.01	191	32.3	30.3	34.9	29.7	A2RVV4	A2RVV4	363	MRI1.6	At5g57700
266161060333252	268580417633057	270359058380127	268763103485107	one-carbon metabolic process [GO:0006730];photorespiration [GO:0009853];tetrahydrofolate interconversion [GO:0035999]	cytosol [GO:0005829];mitochondrion [GO:0005739]	methenyltetrahydrofolate cyclohydrolase activity [GO:0004477];methylenetetrahydrofolate dehydrogenase (NADP+) activity [GO:0004488]	9	0	11.112	58	20.5	20.2	22.4	17.9	A2RVV7	A2RVV7	364	FOLD1	Bifunctional protein FolD 1, mitochondrial
256355819702148	259569511413574	254305858612061	258698081970215				4	0	33.963	10	11.9	9.5	9.5	9.5	A2RVW1	A2RVW1	365	At4g33480	At4g33480
281280975341797	280740833282471	281353073120117	280956211090088	histone H3-R17 methylation [GO:0034971];histone H3-R2 methylation [GO:0034970];histone H3-R26 methylation [GO:0034972];peptidyl-arginine methylation, to asymmetrical-dimethyl arginine [GO:0019919];regulation of flower development [GO:0009909];vegetative to reproductive phase transition of meristem [GO:0010228]	chloroplast [GO:0009507];cytoplasm [GO:0005737];nucleus [GO:0005634]	[myelin basic protein]-arginine N-methyltransferase activity [GO:0016277];histone-arginine N-methyltransferase activity [GO:0008469];protein heterodimerization activity [GO:0046982];protein homodimerization activity [GO:0042803];protein-arginine omega-N asymmetric methyltransferase activity [GO:0035242];protein-arginine omega-N monomethyltransferase activity [GO:0035241]	25	0	65.746	153	26.9	26.7	20.8	26.7	A3KPF2	A3KPF2	366	PRMT14	Probable histone-arginine methyltransferase 1.4
24495885848999	NaN	249517593383789	NaN		spliceosomal complex [GO:0005681]		11	0	24.361	21	4.2	0	2.6	0	A3KPF3	A3KPF3	367	At3g02710	ARM repeat superfamily protein
280680980682373	276873912811279	265692520141602	266044178009033		chloroplast [GO:0009507]		1	0.010011	1.4614	20	1.4	1.4	1.4	1.4	A3KPF8	A3KPF8	368	At1g79080	Pentatricopeptide repeat-containing protein At1g79080, chloroplastic
266856536865234	243268375396729	247416515350342	242399444580078	mRNA splicing, via spliceosome [GO:0000398]	catalytic step 2 spliceosome [GO:0071013];extracellular region [GO:0005576]		9	0	13.471	49	4	2.1	2.1	2.1	A4FVN8	A4FVN8	369	At1g10580	At1g10580
248669338226318	249014091491699	243362674713135	NaN	phosphatidylethanolamine biosynthetic process [GO:0006646];protein autoprocessing [GO:0016540]	cytosol [GO:0005829];endoplasmic reticulum [GO:0005783];endoplasmic reticulum membrane [GO:0005789]	calcium ion binding [GO:0005509];phosphatidylserine decarboxylase activity [GO:0004609]	9	0	4.3225	21	6.8	6.8	6.8	0	A4GNA8	A4GNA8	370	PSD3	Phosphatidylserine decarboxylase proenzyme 3
2802907371521	285957317352295	284800052642822	280147819519043	proteolysis [GO:0006508]	vacuole [GO:0005773]	carboxypeptidase activity [GO:0004180];dipeptidyl-peptidase activity [GO:0008239];serine-type peptidase activity [GO:0008236]	21	0	22.423	14	24.7	18.5	25.5	25.9	A4VCL8	A4VCL8	372	At4g36190	At4g36190
319710025787354	318229732513428	31720287322998	317251319885254	carbohydrate metabolic process [GO:0005975]	cytosol [GO:0005829];secretory vesicle [GO:0099503];vacuole [GO:0005773]	beta-N-acetylhexosaminidase activity [GO:0004563];hexosaminidase activity [GO:0015929];N-acetyl-beta-D-galactosaminidase activity [GO:0102148]	31	0	292.57	386	45.1	43.6	44	37.7	A7WM73	A7WM73	373	HEXO1	Beta-hexosaminidase 1
245230083465576	241842727661133	246886978149414	243043117523193			RNA binding [GO:0003723]	9	0	119.07	41	9.6	9.6	11.1	9.6	A8MQ78	A8MQ78	375	ALY4	ALWAYS EARLY 4
254380302429199	262392711639404	266378231048584	258384113311768		integral component of membrane [GO:0016021];nucleus [GO:0005634];plasma membrane [GO:0005886]	ATP binding [GO:0005524];protein kinase activity [GO:0004672]	8	0	8.4883	39	4.3	7.5	6.1	6	A8MQH3	A8MQH3	378	SRF6	STRUBBELIG-receptor family 6
256714706420898	255918636322021	253525562286377	255617408752441				3	0	72.752	37	13	13	13	13	A8MQJ8	A8MQJ8	380	At2g37680	Glucose-induced degradation-like protein
268960819244385	271661472320557	268818035125732	26871265411377		nascent polypeptide-associated complex [GO:0005854]		11	0	139.01	81	22.7	23.7	35.1	23.7	A8MQP6	A8MQP6	381	At4g10480	Nascent polypeptide-associated complex (NAC), alpha subunit family protein
312460956573486	312989826202393	312246379852295	312833366394043			methylmalonate-semialdehyde dehydrogenase (acylating) activity [GO:0004491]	39	0	323.31	602	49.4	46.4	40.4	53.2	A8MQR6	A8MQR6	382	ALDH6B2	Aldehyde dehydrogenase 6B2
272309589385986	273805522918701	270827369689941	263546752929688			RNA binding [GO:0003723]	15	0	113.17	80	12.1	17.7	7.7	4.9	A8MR27	A8MR27	385	PTB3	Polypyrimidine tract-binding protein 3
267788143157959	262315826416016	269434661865234	273428249359131				6	0	48.615	42	19.8	19.8	19.8	18	A8MR72	A8MR72	386	At2g26210	Ankyrin repeat family protein
274338035583496	278912220001221	277332439422607	277607841491699			translation initiation factor activity [GO:0003743]	39	0	244.99	203	10.1	11	8.2	9.2	A8MR97	A8MR97	387	EIF4G	Eukaryotic translation initiation factor 4G
251626167297363	252787742614746	257413940429688	250807456970215	nucleosome assembly [GO:0006334]	nucleus [GO:0005634]		37	0	323.31	236	13.7	15.8	17.4	14.2	A8MRK6	A8MRK6	389	NAP1:2	Nucleosome assembly protein 12
227512989044189	233219604492188	240473518371582	237110385894775	cellular glucose homeostasis [GO:0001678];glycolytic process [GO:0006096]		ATP binding [GO:0005524];glucose binding [GO:0005536];hexokinase activity [GO:0004396]	6	0	4.0839	21	13.5	9.9	9.9	10.7	A8MRW9	A8MRW9	391	HXK2	Phosphotransferase
283176898956299	280972805023193	279587001800537	274722003936768	glucosinolate biosynthetic process [GO:0019761]		8-methylthiopropyl glucosinolate S-oxygenase activity [GO:0080107];flavin adenine dinucleotide binding [GO:0050660];N,N-dimethylaniline monooxygenase activity [GO:0004499];NADP binding [GO:0050661]	32	0	159.83	223	22.7	19	18.1	12.6	A8MRX0	A8MRX0	392	FMOGS-OX5	Flavin-containing monooxygenase FMO GS-OX5
23721923828125	241979808807373	248068084716797	NaN				2	0.0013052	2.3186	9	3.4	3.8	3.8	0	A8MS42	A8MS42	395	At4g38670	Pathogenesis-related thaumatin superfamily protein
281914520263672	283294143676758	282798099517822	281512203216553	acetyl-CoA biosynthetic process from pyruvate [GO:0006086];cell redox homeostasis [GO:0045454];oxidation-reduction process [GO:0055114];response to arsenic-containing substance [GO:0046685]	chloroplast envelope [GO:0009941];chloroplast stroma [GO:0009570];cytosol [GO:0005829];nucleolus [GO:0005730]	dihydrolipoyl dehydrogenase activity [GO:0004148];flavin adenine dinucleotide binding [GO:0050660]	44	0	323.31	272	37.6	43.3	41.6	35.6	A8MS68	A8MS68	396	LPD1	Dihydrolipoyl dehydrogenase 1, chloroplastic
216922149658203	232133407592773	218247375488281	220445690155029	chromatin maintenance [GO:0070827];embryo development ending in seed dormancy [GO:0009793];mRNA transcription by RNA polymerase II [GO:0042789];nucleosome organization [GO:0034728];positive regulation of transcription elongation from RNA polymerase II promoter [GO:0032968];regulation of mRNA processing [GO:0050684];transcription elongation from RNA polymerase II promoter [GO:0006368]	cytosol [GO:0005829];plasmodesma [GO:0009506];transcription elongation factor complex [GO:0008023];transcriptionally active chromatin [GO:0035327]	histone binding [GO:0042393];nucleosome binding [GO:0031491];translation elongation factor activity [GO:0003746]	42	0	189.62	199	2.1	1.4	1.9	1.9	A8MS85	A8MS85	397	SPT6	Transcription elongation factor SPT6 homolog
NaN	NaN	237355194091797	240530815124512	alanyl-tRNA aminoacylation [GO:0006419]		alanine-tRNA ligase activity [GO:0004813];ATP binding [GO:0005524];nucleic acid binding [GO:0003676]	3	0.0062645	1.6809	8	0	0	5.9	2.3	A8MSD3	A8MSD3	398	At3g16565	Threonyl and alanyl tRNA synthetase second additional domain-containing protein
265940589904785	272510604858398	273372211456299	268731441497803		mitochondrial matrix [GO:0005759]		6	0	5.2785	31	18.8	21.3	9.7	17.4	A8MSD8	A8MSD8	399	At2g41600	Mitochondrial glycoprotein family protein
252150096893311	257994899749756	254571685791016	259657402038574	cell surface pattern recognition receptor signaling pathway [GO:0002752];cellular response to chitin [GO:0071323];cellular response to molecule of bacterial origin [GO:0071219];defense response to bacterium [GO:0042742];defense response to fungus, incompatible interaction [GO:0009817];detection of molecule of fungal origin [GO:0032491];detection of peptidoglycan [GO:0032499];innate immune respons…	integral component of membrane [GO:0016021];plasma membrane [GO:0005886]	ATP binding [GO:0005524];chitin binding [GO:0008061];chitosan binding [GO:2001080];identical protein binding [GO:0042802];kinase activity [GO:0016301];protein homodimerization activity [GO:0042803];protein kinase activity [GO:0004672];protein self-association [GO:0043621];protein serine/threonine kinase activity [GO:0004674];transmembrane receptor protein kinase activity [GO:0019199]	1	0	3.5337	17	1.8	1.8	1.8	1.8	A8R7E6	A8R7E6	401	CERK1	Chitin elicitor receptor kinase 1
263787174224854	NaN	238115692138672	265218257904053	intracellular protein transport [GO:0006886];retrograde transport, endosome to Golgi [GO:0042147]	cytosol [GO:0005829];Golgi apparatus [GO:0005794];intracellular membrane-bounded organelle [GO:0043231];late endosome [GO:0005770];late endosome membrane [GO:0031902];membrane [GO:0016020];multivesicular body [GO:0005771];retromer complex [GO:0030904];retromer, cargo-selective complex [GO:0030906]		21	0	46.485	69	1	0	1.8	1	A8R7K9	A8R7K9	402	VPS35C	Vacuolar protein sorting-associated protein 35C
258865795135498	27176549911499	252851734161377	25235969543457	exonucleolytic trimming to generate mature 3'-end of 5.8S rRNA from tricistronic rRNA transcript (SSU-rRNA, 5.8S rRNA, LSU-rRNA) [GO:0000467];gene silencing by RNA-directed DNA methylation [GO:0080188];histone mRNA catabolic process [GO:0071044];nuclear polyadenylation-dependent antisense transcript catabolic process [GO:0071040];nuclear polyadenylation-dependent CUT catabolic process [GO:0071039…	cytoplasm [GO:0005737];cytosol [GO:0005829];nuclear exosome (RNase complex) [GO:0000176];nucleolus [GO:0005730];nucleus [GO:0005634]	3'-5'-exoribonuclease activity [GO:0000175];nucleotide binding [GO:0000166];single-stranded RNA binding [GO:0003727]	11	0	24.471	33	4.3	1.1	1.7	2.9	A9LLI7	A9LLI7	403	RRP6L2	Protein RRP6-like 2
268424205780029	267323398590088	268314685821533	268063659667969	endoplasmic reticulum to Golgi vesicle-mediated transport [GO:0006888];Golgi vesicle docking [GO:0048211];intracellular protein transport [GO:0006886];membrane fusion [GO:0061025];post-embryonic development [GO:0009791];protein exit from endoplasmic reticulum [GO:0032527];transcytosis [GO:0045056];vesicle fusion with Golgi apparatus [GO:0048280]	cytosol [GO:0005829];endoplasmic reticulum [GO:0005783];ER to Golgi transport vesicle membrane [GO:0012507];Golgi apparatus [GO:0005794];Golgi membrane [GO:0000139];Golgi stack [GO:0005795]		35	0	319.31	166	7.8	7.8	7.1	6.5	B0F9L4	B0F9L4	404	GC6	Golgin candidate 6
NaN	249057769775391	253987827301025	255904083251953	fumarate metabolic process [GO:0006106];tricarboxylic acid cycle [GO:0006099]	tricarboxylic acid cycle enzyme complex [GO:0045239]	fumarate hydratase activity [GO:0004333]	22	0.0029406	2.0677	10	51.1	61.2	47	52.4	B3H477	B3H477	405	FUM2	FUMARASE 2
30085880279541	299914531707764	299028244018555	299453105926514				12	0	131.46	136	48.6	48.6	44.4	40.2	B3H4M0	B3H4M0	408	PIFI	Post-illumination chlorophyll fluorescence increase
300382614135742	299550457000732	299212474822998	299826412200928			translation initiation factor activity [GO:0003743]	26	0	150.49	259	47.5	45.7	43	47.1	B3H5L3	B3H5L3	411	At1g73180	Eukaryotic translation initiation factor eIF2A family protein
323433456420898	324939079284668	325937919616699	324995956420898	branched-chain amino acid biosynthetic process [GO:0009082]		L-isoleucine transaminase activity [GO:0052656];L-leucine transaminase activity [GO:0052654];L-valine transaminase activity [GO:0052655]	33	0	323.31	550	51.8	51.8	55.2	55.2	B3H658	B3H658	414	BCAT3	Branched-chain-amino-acid aminotransferase
229858436584473	22689338684082	228510799407959	226083545684814	nucleosome assembly [GO:0006334]	nucleus [GO:0005634]		31	0	303.56	176	10	6.7	10	6.7	B3H684	B3H684	415	NAP1:1	Nucleosome assembly protein11
249134674072266	249103126525879	247230186462402	245550842285156		integral component of membrane [GO:0016021]		7	0	4.5756	13	3	1.2	1.2	1.2	B3H797	B3H797	419	At4g36210	Transmembrane/coiled-coil protein (DUF726)
239700050354004	NaN	244109935760498	245320167541504		cytosol [GO:0005829];plasmodesma [GO:0009506];plastid [GO:0009536]	acylglycerol lipase activity [GO:0047372]	5	0	11.948	12	3	0	3	3	B3H7N1	B3H7N1	423	At5g16120	Alpha/beta-Hydrolases superfamily protein
276333255767822	274420566558838	275454692840576	276264495849609	pectin catabolic process [GO:0045490]		metal ion binding [GO:0046872];pectate lyase activity [GO:0030570]	11	0	25.571	63	28.7	24.2	30.5	14.5	B3LF89	B3LF89	424	At3g55140	Pectate lyase
300226078033447	301475868225098	300188980102539	302493209838867	cysteinyl-tRNA aminoacylation [GO:0006423];response to cadmium ion [GO:0046686]	cytoplasm [GO:0005737];cytosol [GO:0005829]	ATP binding [GO:0005524];cysteine-tRNA ligase activity [GO:0004817];metal ion binding [GO:0046872]	39	0	310.29	407	46.4	38.7	30.1	33.9	B3LFA4	B3LFA4	425	At5g38830	Cysteine--tRNA ligase 2, cytoplasmic
NaN	NaN	247967948913574	24876802444458	positive regulation of shoot apical meristem development [GO:1902185]	nucleus [GO:0005634]	ATP binding [GO:0005524];DNA binding [GO:0003677];DNA-dependent ATPase activity [GO:0008094];helicase activity [GO:0004386]	4	0	6.5487	13	0	0	0.4	0.4	B5BT18	B5BT18	426	BTAF1	TATA-binding protein-associated factor BTAF1
282865676879883	279179229736328	281707382202148	285560359954834	embryo development ending in seed dormancy [GO:0009793];plastid transcription [GO:0042793]	chloroplast [GO:0009507];cytosol [GO:0005829]	GTP binding [GO:0005525]	17	0	32.714	102	17.9	13.3	14.2	15.2	B5X565	B5X565	430	emb2738	At3g12080
282110862731934	281570167541504	281903228759766	282439975738525				9	0	52.442	67	54.9	54.9	54.9	61.7	B6EUA5	B6EUA5	432	At1g12250	Pentapeptide repeat-containing protein
239999809265137	2362477684021	NaN	237987728118896	mRNA cis splicing, via spliceosome [GO:0045292];mRNA splicing, via spliceosome [GO:0000398]	cytosol [GO:0005829];mediator complex [GO:0016592];U1 snRNP [GO:0005685];U2-type prespliceosome [GO:0071004]	RNA binding [GO:0003723]	11	0	29.998	53	1	0.9	0	1	B6EUA9	B6EUA9	433	PRP40A	Pre-mRNA-processing protein 40A
310288105010986	307827701568604	308513259887695	306495876312256		cytosol [GO:0005829];plasma membrane [GO:0005886];vacuole [GO:0005773]	hydrolase activity, acting on carbon-nitrogen (but not peptide) bonds, in linear amides [GO:0016811]	31	0	323.31	405	62.2	54.6	59.1	59.1	B9DFI3	B9DFI3	435	At4g37550	AT4G37550 protein
235445098876953	233661308288574	236126804351807	243228549957275	ATP synthesis coupled electron transport [GO:0042773]	membrane [GO:0016020]	electron transfer activity [GO:0009055];iron-sulfur cluster binding [GO:0051536];NADH dehydrogenase (ubiquinone) activity [GO:0008137]	29	0	213.99	88	3.5	4.4	3.4	7.2	B9DFQ9	B9DFQ9	437	EMB1467	AT5G37510 protein
27482084274292	272661552429199	27279411315918	275798187255859	cell wall organization [GO:0071555]	extracellular region [GO:0005576];plant-type cell wall [GO:0009505]	carboxylic ester hydrolase activity [GO:0052689];pectin acetylesterase activity [GO:0052793]	7	0	54.698	36	16.4	13.7	23.3	18.8	B9DFR3	B9DFR3	438	PAE9	Pectin acetylesterase 9
305362148284912	30588529586792	306138610839844	305809154510498	cysteine biosynthetic process [GO:0019344];cysteine biosynthetic process from serine [GO:0006535];double fertilization forming a zygote and endosperm [GO:0009567];pollen tube development [GO:0048868];pollen tube growth [GO:0009860]	chloroplast [GO:0009507];chloroplast stroma [GO:0009570];cytosol [GO:0005829];mitochondrion [GO:0005739]	ATP binding [GO:0005524];cysteine synthase activity [GO:0004124];lyase activity [GO:0016829];zinc ion binding [GO:0008270]	41	0	323.31	496	71.6	63.3	66.1	65.6	B9DFR6	B9DFR6	439	OASC	Cysteine synthase
233493537902832	238962440490723	231983394622803	NaN	developmental process [GO:0032502];late endosome to vacuole transport [GO:0045324];protein maturation [GO:0051604];protein transport [GO:0015031];seedling development [GO:0090351];vesicle-mediated transport [GO:0016192]	cytosol [GO:0005829];Golgi apparatus [GO:0005794];membrane [GO:0016020];multivesicular body membrane [GO:0032585];retromer complex [GO:0030904]	phosphatidylinositol binding [GO:0035091];phospholipid binding [GO:0005543];protein heterodimerization activity [GO:0046982]	9	0	16.378	25	2.1	1.7	1.4	0	B9DFS6	B9DFS6	440	SNX2B	Sorting nexin 2B
261762657165527	264117851257324	26570858001709	266805667877197			GTP binding [GO:0005525];hydrolase activity [GO:0016787]	2	0.0098522	1.4802	16	1.7	1.7	1.7	1.7	B9DFZ2	B9DFZ2	441	MCK7.24	AT5G58370 protein
308225936889648	309947605133057	30745189666748	310263061523438	ribosomal small subunit assembly [GO:0000028];translation [GO:0006412]	cytosolic small ribosomal subunit [GO:0022627]	structural constituent of ribosome [GO:0003735]	24	0	323.31	791	46.3	46.9	50.3	41.5	B9DG17	B9DG17	442	P40	40S ribosomal protein SA
280556907653809	283432064056396	281930522918701	28209135055542			transferase activity, transferring acyl groups [GO:0016746]	9	0	22.653	43	25.1	26.6	25.1	16.7	B9DG63	B9DG63	443	At4g28030	AT4G28030 protein
327338638305664	327124366760254	326669769287109	328102149963379	acetate metabolic process [GO:0006083];acetyl-CoA biosynthetic process from acetate [GO:0019427];fatty acid metabolic process [GO:0006631]	chloroplast [GO:0009507];chloroplast stroma [GO:0009570];cytosol [GO:0005829];glyoxysome [GO:0009514]	acetate-CoA ligase activity [GO:0003987];AMP binding [GO:0016208];ATP binding [GO:0005524]	59	0	323.31	890	53	48.9	55.3	48.9	B9DGD6	B9DGD6	444	ACS	Acetyl-coenzyme A synthetase, chloroplastic/glyoxysomal
251222629547119	242437973022461	243957138061523	24865047454834				4	0	5.3129	6	9.5	9.5	12.3	11.5	B9DGS8	B9DGS8	445	At1g14820	AT1G14820 protein
332168121337891	332079696655273	332513809204102	333040237426758	microtubule-based process [GO:0007017]	cytoplasm [GO:0005737];microtubule [GO:0005874]	GTP binding [GO:0005525];GTPase activity [GO:0003924];structural constituent of cytoskeleton [GO:0005200]	53	0	323.31	1476	66.9	62.7	66.7	66.2	B9DGT7	B9DGT7	446	TUBA2	Tubulin alpha-2 chain
264051609039307	268485221862793	274835453033447	274100551605225	thiamine diphosphate biosynthetic process [GO:0009229];thiamine metabolic process [GO:0006772]	cytosol [GO:0005829]	ATP binding [GO:0005524];kinase activity [GO:0016301];thiamine binding [GO:0030975];thiamine diphosphokinase activity [GO:0004788]	10	0	83.605	78	19.1	13.9	13.5	18.4	B9DGU7	B9DGU7	447	TPK1	Thiamine pyrophosphokinase 1
314939060211182	314001922607422	314222183227539	315018978118896	methylglyoxal catabolic process to D-lactate via S-lactoyl-glutathione [GO:0019243];response to cadmium ion [GO:0046686]	chloroplast [GO:0009507];cytosol [GO:0005829];extracellular region [GO:0005576]	lactoylglutathione lyase activity [GO:0004462];metal ion binding [GO:0046872]	24	0	323.31	417	64.3	62.1	67.2	63.4	B9DH52	B9DH52	448	At1g08110	Lactoylglutathione lyase
25044059753418	25095027923584	253277626037598	247734413146973	coenzyme A biosynthetic process [GO:0015937]	cytosol [GO:0005829];nucleus [GO:0005634]	pantothenate kinase activity [GO:0004594]	15	0	10.11	15	29.1	18.6	16.3	26.3	B9DH75	B9DH75	449	At2g17320	AT2G17320 protein
244294357299805	247241630554199	243875865936279	245264148712158	endoplasmic reticulum membrane organization [GO:0090158];endoplasmic reticulum-plasma membrane tethering [GO:0061817];intracellular transport [GO:0046907];viral process [GO:0016032]	endoplasmic reticulum membrane [GO:0005789];extracellular region [GO:0005576];integral component of membrane [GO:0016021];plasma membrane [GO:0005886]		2	0.0048886	1.8544	16	2.3	4.7	2.3	2.3	B9DHD7	B9DHD7	451	PVA22	Vesicle-associated protein 2-2
314283218383789	312775840759277	314515972137451	315164375305176	microtubule-based process [GO:0007017]	cytoplasm [GO:0005737];microtubule [GO:0005874]	GTP binding [GO:0005525];GTPase activity [GO:0003924];structural constituent of cytoskeleton [GO:0005200]	45	0	323.31	551	66.4	65.8	65.8	65.8	B9DHQ0	B9DHQ0	453	TUBA5	Tubulin alpha-5 chain
260307159423828	264093589782715	267491912841797	26440013885498		integral component of membrane [GO:0016021];plasma membrane [GO:0005886]	ATP binding [GO:0005524];protein serine/threonine kinase activity [GO:0004674]	9	0	15.894	49	1.7	3.9	5.2	4.1	C0LGD7	C0LGD7	454	At1g06840	Probable LRR receptor-like serine/threonine-protein kinase At1g06840
281208000183105	280146217346191	274922065734863	27365779876709		integral component of membrane [GO:0016021];membrane [GO:0016020];plasma membrane [GO:0005886]	ATP binding [GO:0005524];protein serine/threonine kinase activity [GO:0004674]	4	0.00094056	2.4799	26	2.9	2.9	2.9	2.9	C0LGE4	C0LGE4	455	At1g12460	Probable LRR receptor-like serine/threonine-protein kinase At1g12460
260680065155029	264603748321533	260119285583496	260303592681885	protein autophosphorylation [GO:0046777]	integral component of membrane [GO:0016021];plasma membrane [GO:0005886]	ATP binding [GO:0005524];protein serine/threonine kinase activity [GO:0004674]	8	0	8.9923	25	4.1	3.1	3	4.3	C0LGG8	C0LGG8	456	At1g53430	Probable LRR receptor-like serine/threonine-protein kinase At1g53430
257732906341553	257972640991211	26466625213623	264726810455322	protein autophosphorylation [GO:0046777]	integral component of membrane [GO:0016021];plasma membrane [GO:0005886]	ATP binding [GO:0005524];protein serine/threonine kinase activity [GO:0004674]	6	0	14.433	32	1.6	0.9	3.4	0.9	C0LGH3	C0LGH3	457	At1g56140	Probable LRR receptor-like serine/threonine-protein kinase At1g56140
277309150695801	274993724822998	277491283416748	27665397644043	jasmonic acid and ethylene-dependent systemic resistance [GO:0009861];protein autophosphorylation [GO:0046777];regulation of innate immune response [GO:0045088]	cytosol [GO:0005829];integral component of membrane [GO:0016021];plasma membrane [GO:0005886];plasmodesma [GO:0009506]	ATP binding [GO:0005524];protein serine/threonine kinase activity [GO:0004674]	16	0	35.216	70	14.4	12.2	10.6	12.8	C0LGN2	C0LGN2	459	LRR-RLK	Probable leucine-rich repeat receptor-like serine/threonine-protein kinase At3g14840
275018043518066	275074100494385	276049137115479	273964824676514	actin filament bundle assembly [GO:0051017]		actin filament binding [GO:0051015]	10	0	8.5699	56	7.1	8.5	8.5	13.3	C0Z268	C0Z268	461	FIM1	AT4G26700 protein
272055511474609	273323631286621	268723220825195	272779941558838		chloroplast [GO:0009507]	ferredoxin-NADP+ reductase activity [GO:0004324]	44	0	11.126	32	89.4	87.5	89.4	89.4	C0Z2A8	C0Z2A8	464	FNR2	Ferredoxin--NADP reductase, chloroplastic
282111797332764	278809280395508	280877017974854	281300621032715		cytosol [GO:0005829];extracellular region [GO:0005576];plasma membrane [GO:0005886]	hydrolase activity [GO:0016787]	10	0	38.334	85	22.7	18.6	37.6	27.3	C0Z2J1	C0Z2J1	465	At1g11360	AT1G11360 protein
245718994140625	248615016937256	249308471679688	247318477630615		nucleus [GO:0005634]	DNA binding [GO:0003677]	3	0.0048913	1.8599	17	7.5	7.5	7.5	7.5	C0Z2P1	C0Z2P1	466	At1g74840	AT1G74840 protein
278847179412842	276485595703125	282601089477539	282496147155762	chaperone cofactor-dependent protein refolding [GO:0051085];protein folding [GO:0006457];protein refolding [GO:0042026]	chloroplast [GO:0009507];chloroplast stroma [GO:0009570];cytosol [GO:0005829];cytosolic ribosome [GO:0022626];mitochondrion [GO:0005739];plastid [GO:0009536]	ATP binding [GO:0005524]	79	0	323.31	343	49.6	50.3	58.8	57	C0Z361	C0Z361	468	CPN60B3	Chaperonin 60 subunit beta 3, chloroplastic
231445426940918	224078464508057	219332981109619	233413677215576		cytosol [GO:0005829]	metal ion binding [GO:0046872];metalloendopeptidase activity [GO:0004222]	39	0	226.35	149	1.7	2.2	0.9	3	F4HNU6	F4HNU6	519	At1g06900	Nardilysin-like
NaN	249142875671387	254936580657959	NaN			ATP binding [GO:0005524];protein kinase activity [GO:0004672]	10	0	30.593	36	0	1	2.4	0	F4HPS0	F4HPS0	522	ATMAP4K ALPHA1	Protein kinase superfamily protein
269344959259033	269194583892822	234927730560303	233498935699463	peptidyl-serine phosphorylation [GO:0018105];peptidyl-threonine phosphorylation [GO:0018107]	cytoplasm [GO:0005737];cytosol [GO:0005829];plasma membrane [GO:0005886]	ATP binding [GO:0005524];protein serine/threonine kinase activity [GO:0004674]	14	0	49.915	36	1.1	1.1	2.1	2.1	F4HQ88	F4HQ88	525	At1g73460	Protein kinase superfamily protein
256606311798096	258708419799805	262087535858154	259261035919189	flower development [GO:0009908];histone methylation [GO:0016571];negative regulation of flower development [GO:0009910];transcription elongation from RNA polymerase II promoter [GO:0006368]	Cdc73/Paf1 complex [GO:0016593];nucleus [GO:0005634];transcriptionally active chromatin [GO:0035327]	chromatin binding [GO:0003682];RNA polymerase II complex binding [GO:0000993]	7	0	6.3469	20	2	2	2	2	F4HQA1	F4HQA1	526	VIP2	Protein PAF1 homolog
273421478271484	277114849090576	27534008026123	275539131164551			hydrolase activity [GO:0016787]	8	0	12.366	42	11.9	12.2	14.4	19.6	F4HQA8	F4HQA8	527	FHY1	Haloacid dehalogenase-like hydrolase (HAD) superfamily protein
310101871490479	310120525360107	309092063903809	309528255462646		cell wall [GO:0005618];cytosol [GO:0005829];mitochondrion [GO:0005739];nucleus [GO:0005634];plasma membrane [GO:0005886];plasmodesma [GO:0009506]	ATP binding [GO:0005524]	116	0	323.31	732	84.8	84	79.5	85.6	F4HQD4	F4HQD4	528	HSP70-15	Heat shock 70 kDa protein 15
303965225219727	311807403564453	304787521362305	294465579986572	chloroplast rRNA processing [GO:1901259];regulation of RNA metabolic process [GO:0051252]	chloroplast [GO:0009507];chloroplast envelope [GO:0009941];chloroplast stroma [GO:0009570];chloroplast thylakoid membrane [GO:0009535];nucleus [GO:0005634];plastid [GO:0009536];ribonucleoprotein complex [GO:1990904]	mRNA binding [GO:0003729];RNA binding [GO:0003723]	25	0	150.77	293	52.4	52.4	46.3	47.6	F4HQH8	F4HQH8	530	At1g01080	RNA-binding (RRM/RBD/RNP motifs) family protein
341626396179199	342179107666016	34277458190918	342591896057129			nucleotide binding [GO:0000166];oxidoreductase activity, acting on the aldehyde or oxo group of donors, NAD or NADP as acceptor [GO:0016620]	70	0	323.31	1302	88.4	88.4	88.4	88.4	F4HQT1	F4HQT1	531	GAPC2	Glyceraldehyde-3-phosphate dehydrogenase C2
220744075775146	NaN	224227809906006	NaN				12	0	25.408	62	1.9	0	1.9	0	F4HQZ1	F4HQZ1	532	At1g19880	Regulator of chromosome condensation (RCC1) family protein
299367713928223	299314270019531	2967116355896	298798046112061				23	0	160.2	179	34.9	38.1	39.1	45	F4HR91	F4HR91	533	At1g33610	Leucine-rich repeat (LRR) family protein
2181005859375	220223541259766	22553092956543	NaN				3	0	9.5236	16	4	4	4	0	F4HRG2	F4HRG2	535	At1g53345	DHHA1 domain protein
273874702453613	266632957458496	258092155456543	274551296234131	carbohydrate metabolic process [GO:0005975];ethylene biosynthetic process [GO:0009693];regulation of ethylene biosynthetic process [GO:0010364];regulation of leaf senescence [GO:1900055];starch metabolic process [GO:0005982];trehalose metabolic process [GO:0005991]	cytosol [GO:0005829]		24	0	65.442	66	0.4	0.4	1.1	1	F4HRS2	F4HRS2	537	SWEETIE	Protein SWEETIE
273716068267822	250930137634277	275161552429199	276992225646973	nucleus organization [GO:0006997];regulation of nucleus size [GO:0097298]	cytoplasmic chromatin [GO:0000789];cytosol [GO:0005829];mitochondrion [GO:0005739];nuclear envelope [GO:0005635];nuclear lamina [GO:0005652];nuclear membrane [GO:0031965];nuclear periphery [GO:0034399];nucleoplasm [GO:0005654];nucleus [GO:0005634]		30	0	110.28	97	1.3	2.5	1.3	2.4	F4HRT5	F4HRT5	538	CRWN1	Protein CROWDED NUCLEI 1
305700950622559	305862045288086	306028442382813	30521312713623	carbohydrate metabolic process [GO:0005975];glycerol-3-phosphate metabolic process [GO:0006072]		glycerol kinase activity [GO:0004370]	47	0	323.31	625	67.8	59.8	58.3	61.8	F4HS76	F4HS76	539	NHO1	Actin-like ATPase superfamily protein
297059764862061	296965236663818	298075180053711	298173408508301		cytoplasm [GO:0005737];cytosol [GO:0005829];extracellular region [GO:0005576];nucleus [GO:0005634]		49	0	161.2	282	20.8	21.5	19.8	19.1	F4HS99	F4HS99	540	At1g01320	Tetratricopeptide repeat (TPR)-like superfamily protein
NaN	NaN	235827922821045	238392276763916		mitochondrion [GO:0005739]	GTP binding [GO:0005525]	2	0	3.839	2	0	0	2	2	F4HSD4	F4HSD4	541	ATOBGM	Probable GTP-binding protein OBGM, mitochondrial
232295818328857	228181571960449	NaN	NaN	tRNA pseudouridine synthesis [GO:0031119]		pseudouridine synthase activity [GO:0009982];RNA binding [GO:0003723]	8	0	17.903	30	3.4	3.4	0	0	F4HSS8	F4HSS8	543	At1g20410	Pseudouridine synthase family protein
251888046264648	249771862030029	250976810455322	250206432342529	negative regulation of defense response to bacterium, incompatible interaction [GO:1902478]		GTP binding [GO:0005525]	5	0	14.688	24	7.3	7.3	7.3	7	F4HT21	F4HT21	545	IAN9	Immune-associated nucleotide-binding protein 9
NaN	NaN	249897556304932	252052345275879	DNA replication initiation [GO:0006270]	alpha DNA polymerase:primase complex [GO:0005658];mitochondrion [GO:0005739]	DNA binding [GO:0003677]	14	0	30.691	36	2.6	4.4	1.3	5.5	F4HTP2	F4HTP2	546	POLA2	DNA polymerase alpha subunit B
239250621795654	238489055633545	242873592376709	244381580352783				3	0	5.6952	16	4.4	1.5	1.5	1.5	F4HTR6	F4HTR6	548	At1g67800	Copine (Calcium-dependent phospholipid-binding protein) family
294040355682373	295884037017822	308052425384521	309109230041504		chloroplast [GO:0009507];chloroplast thylakoid [GO:0009534];mitochondrion [GO:0005739]	peptidyl-prolyl cis-trans isomerase activity [GO:0003755]	19	0	261.34	180	37.9	42.9	40.7	44.5	F4HTT6	F4HTT6	549	CYP26-2	Peptidyl-prolyl cis-trans isomerase CYP26-2, chloroplastic
243069553375244	246368827819824	249425277709961	25157190322876	endoplasmic reticulum to Golgi vesicle-mediated transport [GO:0006888]	cytoplasm [GO:0005737];mitochondrion [GO:0005739];nucleus [GO:0005634];TRAPP complex [GO:0030008]		4	0	5.8748	12	11.1	11.1	11.1	11.1	F4HTY0	F4HTY0	550	At1g80500	SNARE-like superfamily protein
289892349243164	28994478225708	290092124938965	290765838623047	acyl-CoA metabolic process [GO:0006637];fatty acid catabolic process [GO:0009062]	peroxisome [GO:0005777]	acyl-CoA hydrolase activity [GO:0047617]	20	0	64.273	207	44	39.8	39.8	32.8	F4HU51	F4HU51	551	At1g01710	Acyl-CoA thioesterase II
286465015411377	288465213775635	282129878997803	289872303009033	peptidyl-lysine monomethylation [GO:0018026]		protein-lysine N-methyltransferase activity [GO:0016279]	7	0	12.231	36	1.6	1.6	3.8	1.6	F4HU79	F4HU79	552	At1g01920	SET domain-containing protein
276814384460449	278753719329834	276867904663086	275856323242188	RNA catabolic process [GO:0006401]	extracellular region [GO:0005576];secretory vesicle [GO:0099503]	endoribonuclease activity [GO:0004521];ribonuclease T2 activity [GO:0033897];RNA binding [GO:0003723]	12	0	59.881	120	22.3	18.2	28.7	18.2	F4HUG9	F4HUG9	554	At1g14210	Ribonuclease T2 family protein
243842296600342	242440891265869	241922721862793	248088703155518	fatty acid metabolic process [GO:0006631]	peroxisome [GO:0005777]	ligase activity [GO:0016874]	8	0	7.277	32	3.4	1.4	1.4	3.4	F4HUK6	F4HUK6	555	AAE1	Probable acyl-activating enzyme 1, peroxisomal
314545917510986	31306661605835	298718814849854	314522857666016				10	0	6.5554	19	3.8	2.5	1.6	2.5	F4HV50;REV__F4HV50	F4HV50	557	At1g47900	Filament-like protein (DUF869)
NaN	243389205932617	2428883934021	NaN		plasma membrane [GO:0005886]	mRNA binding [GO:0003729]	14	0	36.352	15	11.9	15.1	18.1	12.8	F4HV67	F4HV67	558	UBP1A	Oligouridylate-binding protein 1A
257632694244385	268384590148926	259891700744629	261594638824463			ATP binding [GO:0005524];helicase activity [GO:0004386];nucleic acid binding [GO:0003676]	50	0	243.24	100	56.5	53.1	56.3	59	F4HV96	F4HV96	559	EIF4A-2	Eif4a-2
264214000701904	267886791229248	262823314666748	270424957275391	detection of redox state [GO:0051776];photosystem stoichiometry adjustment [GO:0080005];protein autophosphorylation [GO:0046777];regulation of gene expression [GO:0010468];regulation of photosynthesis [GO:0010109]	chloroplast [GO:0009507];chloroplast stroma [GO:0009570]	kinase activity [GO:0016301];protein histidine kinase activity [GO:0004673];protein self-association [GO:0043621];quinone binding [GO:0048038]	7	0	36.094	33	11.3	13.7	13.7	13.7	F4HVG8	F4HVG8	560	CSK	Chloroplast sensor kinase, chloroplastic
200364418029785	20127420425415	216708984375	208011245727539	regulation of translation [GO:0006417]	CCR4-NOT core complex [GO:0030015]		73	0	323.31	340	1	0.4	1.1	0.9	F4HVV7;REV__F4JCM5	F4HVV7	561	At1g02080	Transcription regulator
264426879882813	26533576965332	244806213378906	268826198577881		cytosol [GO:0005829]	mRNA binding [GO:0003729]	11	0	21.479	30	2.5	2.5	3.7	2.5	F4HWB0	F4HWB0	563	At1g14710	Hydroxyproline-rich glycoprotein family protein
282598838806152	284252243041992	284027557373047	28344518661499		integral component of membrane [GO:0016021];plasma membrane [GO:0005886];vacuole [GO:0005773]	mRNA binding [GO:0003729]	17	0	26.125	118	7.8	9	6.3	7.2	F4HWC3	F4HWC3	564	At1g20970	Calponin-like domain protein
297496242523193	299144191741943	299968509674072	299485168457031	tRNA aminoacylation for protein translation [GO:0006418]	cytosol [GO:0005829]	ATP binding [GO:0005524];tyrosine-tRNA ligase activity [GO:0004831]	39	0	113.02	286	30.6	27	23.3	24.2	F4HWL4	F4HWL4	566	At1g28350	Tyrosine--tRNA ligase 2, cytoplasmic
250183525085449	2519140625	243798751831055	250745544433594			mRNA binding [GO:0003729]	7	0	15.692	17	1.6	1.6	1.6	1.6	F4HWS5	F4HWS5	567	ECT7	Evolutionarily conserved C-terminal region 7
298488655090332	298667335510254	297386817932129	297529602050781	endosome to plasma membrane protein transport [GO:0099638];multivesicular body organization [GO:0036257];protein transport to vacuole involved in ubiquitin-dependent protein catabolic process via the multivesicular body sorting pathway [GO:0043328];vacuole organization [GO:0007033]	cytoplasm [GO:0005737];cytosol [GO:0005829];late endosome [GO:0005770];multivesicular body [GO:0005771];plasmodesma [GO:0009506]	protein self-association [GO:0043621];ubiquitin binding [GO:0043130]	46	0	280.6	370	28	22.1	29	26.2	F4HXZ1	F4HXZ1	569	BRO1	Vacuolar-sorting protein BRO1
NaN	260956707000732	2536305809021	267507266998291	embryo development ending in seed dormancy [GO:0009793];protein import [GO:0017038];protein targeting [GO:0006605]	chloroplast envelope [GO:0009941];membrane [GO:0016020];plastid [GO:0009536]	ATP binding [GO:0005524];metal ion binding [GO:0046872]	6	0.0013079	2.3436	21	0	0.7	0.7	1.7	F4HY36	F4HY36	570	SECA2	Protein translocase subunit SecA
285170936584473	287682495117188	286506156921387	288661136627197				15	0	77.768	50	0.7	0.7	0.7	1.5	F4HYA7	F4HYA7	571	At1g35220	FAM91 carboxy-terminus protein
313753414154053	313925361633301	31538158416748	313637981414795	D-cysteine catabolic process [GO:0019447];ethylene biosynthetic process [GO:0009693];response to cadmium ion [GO:0046686]	chloroplast [GO:0009507];cytosol [GO:0005829];mitochondrion [GO:0005739];nucleus [GO:0005634]	cobalt ion binding [GO:0050897];D-cysteine desulfhydrase activity [GO:0019148];hydrolase activity [GO:0016787]	30	0	323.31	444	58.9	59.9	59.1	58.9	F4HYF3	F4HYF3	573	DCD	Bifunctional D-cysteine desulfhydrase/1-aminocyclopropane-1-carboxylate deaminase, mitochondrial
272463550567627	270758190155029	281323699951172	280755138397217			ATP binding [GO:0005524]	20	0	8.4414	32	6	2.2	2.5	2.5	F4HZ82	F4HZ82	575	At1g02890	AAA-type ATPase family protein
295647277832031	298321781158447	300614948272705	30066764831543		chloroplast [GO:0009507];chloroplast envelope [GO:0009941];chloroplast stroma [GO:0009570];extracellular region [GO:0005576];mitochondrion [GO:0005739];plastid stroma [GO:0009532];thylakoid [GO:0009579]	serine-type endopeptidase activity [GO:0004252]	18	0	298.47	187	34.1	41.1	31.6	30.5	F4HZE0	F4HZE0	577	At1g09130	ATP-dependent Clp protease proteolytic subunit
242792339324951	254492530822754	NaN	247076721191406	protein stabilization [GO:0050821];proteolysis [GO:0006508]	mitochondrion [GO:0005739];nucleus [GO:0005634]	aminopeptidase activity [GO:0004177];manganese ion binding [GO:0030145];metallopeptidase activity [GO:0008237];peptidase activity [GO:0008233]	6	0	15.601	39	7.1	6.3	2.2	6.3	F4HZG9	F4HZG9	578	ICP55	Intermediate cleaving peptidase 55, mitochondrial
244399337768555	246684989929199	245994033813477	208184700012207		vacuole [GO:0005773]		13	0	22.572	45	2.5	1.4	1.4	0.8	F4HZS8	F4HZS8	580	At1g22060	Sporulation-specific protein
252337417602539	253676643371582	256178722381592	252542533874512		host cell nucleus [GO:0042025];nucleus [GO:0005634]	zinc ion binding [GO:0008270]	6	0	13.975	48	7.9	6.1	7.9	6.2	F4I045	F4I045	582	At1g48950	C3HC zinc finger-like protein
261218090057373	NaN	252038536071777	268269920349121	2-oxoglutarate metabolic process [GO:0006103];aspartate metabolic process [GO:0006531];biosynthetic process [GO:0009058];cellular amino acid metabolic process [GO:0006520];glutamate metabolic process [GO:0006536]	cytoplasm [GO:0005737];cytosol [GO:0005829];nucleus [GO:0005634]	L-aspartate:2-oxoglutarate aminotransferase activity [GO:0004069];pyridoxal phosphate binding [GO:0030170]	19	0	101.64	88	6.4	2.2	11.4	11.4	F4I0D4;P46646	F4I0D4	583	ASP4	Aspartate aminotransferase;Aspartate aminotransferase, cytoplasmic isozyme 2
265959091186523	28583517074585	270466651916504	276728324890137				9	0	5.2429	39	4.7	7.3	7.6	4.7	F4I0I6	F4I0I6	584	At1g69030	BSD domain-containing protein
NaN	255670909881592	265574531555176	248525772094727	chloroplast organization [GO:0009658];etioplast organization [GO:0009662];plastid transcription [GO:0042793];regulation of transcription, DNA-templated [GO:0006355]	chloroplast nucleoid [GO:0042644];cytoplasm [GO:0005737];plastid-encoded plastid RNA polymerase complex [GO:0000427]	carbohydrate kinase activity [GO:0019200]	3	0	3.3802	13	2	4.7	2.8	3.3	F4I0K2	F4I0K2	585	FLN2	Fructokinase-like 2, chloroplastic
261166019439697	262018165588379	258523387908936	257204627990723				3	0	10.351	22	11.3	24.7	11.3	24.7	F4I0N7	F4I0N7	586	GASA1	GAST1 protein homolog 1
289422931671143	288441886901855	292937526702881	291211700439453	leucyl-tRNA aminoacylation [GO:0006429]	chloroplast [GO:0009507];cytosol [GO:0005829];plasmodesma [GO:0009506]	aminoacyl-tRNA editing activity [GO:0002161];ATP binding [GO:0005524];leucine-tRNA ligase activity [GO:0004823]	109	0	323.31	845	22.8	21.6	29.9	25.8	F4I116	F4I116	588	At1g09620	Leucine--tRNA ligase, cytoplasmic
256497383117676	26390869140625	261886177062988	264366970062256		nucleus [GO:0005634]	mRNA binding [GO:0003729]	18	0	237.15	142	7.1	8.8	7.3	9.5	F4I1G1	F4I1G1	589	At1g29350	RNA polymerase II degradation factor-like protein (DUF1296)
254206295013428	27358922958374	270043182373047	27289119720459	histone acetylation [GO:0016573];regulation of DNA demethylation [GO:1901535];regulation of DNA methylation [GO:0044030]			16	0	41.514	64	2.3	1.5	1.5	1.5	F4I1S8	F4I1S8	591	ELP2	Elongator protein 2
314514999389648	315250988006592	315931243896484	316235733032227		chloroplast [GO:0009507];cytoplasm [GO:0005737];cytosol [GO:0005829];mitochondrion [GO:0005739]	endopeptidase activity [GO:0004175];oligopeptidase activity [GO:0070012];serine-type endopeptidase activity [GO:0004252];serine-type exopeptidase activity [GO:0070008]	53	0	323.31	848	49.8	46	46.2	43.4	F4I2A0	F4I2A0	593	At1g76140	Prolyl oligopeptidase family protein
225823097229004	NaN	238776435852051	NaN	embryo development ending in seed dormancy [GO:0009793];mRNA cis splicing, via spliceosome [GO:0045292];regulation of gene expression [GO:0010468]	cytoplasm [GO:0005737];nuclear speck [GO:0016607];nucleus [GO:0005634];spliceosomal complex [GO:0005681]		9	0	8.7913	16	1.5	0	1.3	0	F4I2J8	F4I2J8	595	CTN	Cactin
NaN	NaN	24309663772583	242717037200928	pseudouridine synthesis [GO:0001522];tRNA processing [GO:0008033]		pseudouridine synthase activity [GO:0009982];RNA binding [GO:0003723];tRNA pseudouridine synthase activity [GO:0106029]	4	0	3.1533	10	0	0	7	3.2	F4I2L0	F4I2L0	596	At1g09800	tRNA pseudouridine synthase
263569774627686	259230442047119	255943145751953	257201232910156		cytosol [GO:0005829]	hydrolase activity [GO:0016787]	9	0	6.0555	20	26	18.3	7.7	19.9	F4I353	F4I353	600	At1g29840	Alpha/beta-Hydrolases superfamily protein
24197904586792	221279239654541	NaN	234354267120361	cellular response to heat [GO:0034605];mRNA processing [GO:0006397]	cytoplasmic stress granule [GO:0010494];cytosol [GO:0005829];nucleus [GO:0005634]	mRNA binding [GO:0003729];poly(A) binding [GO:0008143]	14	0	323.31	88	7.9	6.7	8.1	10.8	F4I3B3	F4I3B3	603	RBP47A	Polyadenylate-binding protein RBP47A
295652713775635	295737819671631	295073337554932	296346759796143	response to oxidative stress [GO:0006979]	mitochondrion [GO:0005739];nucleus [GO:0005634];peroxisome [GO:0005777]	oxidoreductase activity [GO:0016491];zinc ion binding [GO:0008270]	31	0	107.99	265	29.3	31.1	31.7	30.7	F4I3C3	F4I3C3	604	NQR	ARP protein (REF)
317987308502197	31897424697876	318228969573975	319003429412842		chloroplast [GO:0009507];chloroplast stroma [GO:0009570];cytoplasm [GO:0005737];nucleus [GO:0005634]	ATP binding [GO:0005524];ATPase activity [GO:0016887];GTP binding [GO:0005525];ribosomal large subunit binding [GO:0043023];ribosome binding [GO:0043022]	30	0	323.31	480	64.6	76.5	68.9	70.8	F4I3J0	F4I3J0	605	At1g56050	Obg-like ATPase 1
347035751342773	346594352722168	346581077575684	347749977111816	response to cadmium ion [GO:0046686]	apoplast [GO:0048046];chloroplast [GO:0009507];chloroplast envelope [GO:0009941];chloroplast stroma [GO:0009570];cytosol [GO:0005829];nucleus [GO:0005634];plasma membrane [GO:0005886];vacuole [GO:0005773]	metallopeptidase activity [GO:0008237];zinc ion binding [GO:0008270]	119	0	323.31	2778	76.4	76.9	80.9	82.1	F4I3R1	F4I3R1	608	At1g63770	Peptidase M1 family protein
310243911743164	311904296875	309391574859619	312638282775879		mitochondrion [GO:0005739];plasma membrane [GO:0005886]	GTP binding [GO:0005525];GTPase activity [GO:0003924];translation initiation factor activity [GO:0003743]	44	0	323.31	285	11.7	11.1	20.5	12.8	F4I420	F4I420	609	At1g76810	Eukaryotic translation initiation factor 2 (eIF-2) family protein
252790565490723	25663402557373	258317832946777	255592632293701			Hsp90 protein binding [GO:0051879]	8	0	11.221	30	10.6	13.9	17.2	11.1	F4I456	F4I456	610	TPR2	Tetratricopeptide repeat (TPR)-like superfamily protein
264636516571045	264046745300293	261758079528809	253174476623535			ATP binding [GO:0005524];protein serine/threonine kinase activity [GO:0004674];protein-containing complex binding [GO:0044877]	14	0	28.246	33	0.7	0.7	0.7	1.4	F4I4X6	F4I4X6	613	TOR	Serine/threonine-protein kinase TOR
273461265563965	26726634979248	262361164093018	264512825012207	ubiquitin-dependent protein catabolic process [GO:0006511]	cytosol [GO:0005829];plasma membrane [GO:0005886]	ATP binding [GO:0005524];ubiquitin-protein transferase activity [GO:0004842]	8	0	26.836	28	26.3	26.3	40.5	40.5	F4I5B8	F4I5B8	616	UBC28	Ubiquitin-conjugating enzyme 28
283679466247559	283085613250732	284781150817871	282539920806885	DNA repair [GO:0006281];mRNA splicing, via spliceosome [GO:0000398]	Prp19 complex [GO:0000974]	ubiquitin protein ligase activity [GO:0061630]	28	0	91.359	175	26.2	34	22	37.1	F4I5P3	F4I5P3	617	MAC3A	MOS4-associated complex 3A
25844841003418	25702953338623	264213676452637	NaN		nucleus [GO:0005634];vacuolar membrane [GO:0005774];vacuole [GO:0005773]		3	0	42.027	8	22.6	16.1	16.1	0	F4I600	F4I600	618	At1g16820	Vacuolar ATP synthase catalytic subunit-related / V-ATPase-related / vacuolar proton pump-like protein
25141918182373	254700450897217	252275123596191	256331462860107	regulation of phosphoprotein phosphatase activity [GO:0043666]	vacuolar membrane [GO:0005774]	protein phosphatase binding [GO:0019903];protein phosphatase regulator activity [GO:0019888]	35	0	205.66	167	0.7	4.2	1.7	4.2	F4I6B2	F4I6B2	619	At1g30470	SIT4 phosphatase-associated family protein
23192211151123	229998264312744	239100379943848	264681816101074	CTP biosynthetic process [GO:0006241];'de novo' CTP biosynthetic process [GO:0044210];glutamine metabolic process [GO:0006541];pyrimidine nucleobase biosynthetic process [GO:0019856]	cytosol [GO:0005829]	ATP binding [GO:0005524];CTP synthase activity [GO:0003883];identical protein binding [GO:0042802]	24	0	78.977	91	4.3	4.3	9.2	2	F4I6G9	F4I6G9	620	At1g30820	CTP synthase
334166450500488	33457088470459	334984550476074	335413246154785	biosynthetic process [GO:0009058];cellular response to hypoxia [GO:0071456];L-alanine catabolic process, by transamination [GO:0019481];response to cadmium ion [GO:0046686];response to hypoxia [GO:0001666]	mitochondrion [GO:0005739];nucleus [GO:0005634]	ATP binding [GO:0005524];L-alanine:2-oxoglutarate aminotransferase activity [GO:0004021];pyridoxal phosphate binding [GO:0030170]	48	0	323.31	1108	51	53.2	57.5	57.5	F4I7I0	F4I7I0	623	ALAAT1	Alanine aminotransferase 1, mitochondrial
308755493164063	30776273727417	308953323364258	307738399505615	iron ion homeostasis [GO:0055072];iron ion transport [GO:0006826]	apoplast [GO:0048046];cell wall [GO:0005618];plasma membrane [GO:0005886];plasmodesma [GO:0009506];secretory vesicle [GO:0099503]	copper ion binding [GO:0005507];ferroxidase activity [GO:0004322]	20	0	222.07	272	30.6	31.2	23.1	24.9	F4I7X1	F4I7X1	624	SKS6	SKU5-similar 6
245014247894287	NaN	238260955810547	241042957305908	cell wall organization [GO:0071555]	extracellular region [GO:0005576];plant-type cell wall [GO:0009505]	carboxylic ester hydrolase activity [GO:0052689];pectin acetylesterase activity [GO:0052793]	5	0	5.8026	14	5.2	0	2.5	3.2	F4I839	F4I839	625	PAE2	Pectin acetylesterase 2
27259973526001	274025936126709	26929988861084	255522727966309	reciprocal meiotic recombination [GO:0007131]	chloroplast [GO:0009507];microtubule associated complex [GO:0005875]		30	0	67.882	95	5.5	4.4	5.9	2.7	F4I8B9	F4I8B9	626	At1g65010	Putative WEB family protein At1g65010, chloroplastic
317908706665039	316770324707031	315708637237549	316341304779053		chloroplast [GO:0009507];chloroplast stroma [GO:0009570]	glyoxylate reductase (NADP) activity [GO:0030267];NAD binding [GO:0051287];NADP binding [GO:0050661];oxidoreductase activity, acting on the CH-OH group of donors, NAD or NADP as acceptor [GO:0016616]	31	0	323.31	396	70.1	76.8	64	76.8	F4I907	F4I907	628	GLYR2	Glyoxylate/succinic semialdehyde reductase 2, chloroplastic
266356105804443	266687145233154	266867237091064	267367324829102	regulation of transcription, DNA-templated [GO:0006355]	nucleus [GO:0005634]	transcription corepressor activity [GO:0003714]	7	0	6.5559	8	0.8	0.8	0.8	0.8	F4I962	F4I962	629	SNL3	SIN3-like 3
266868572235107	268709125518799	265448207855225	247016048431396				21	0	150.97	72	1.3	1.3	1.3	2.3	F4I983	F4I983	630	At1g24300	GYF domain-containing protein
239320201873779	237406749725342	241768360137939	NaN				5	0	5.4639	3	0.9	0.9	0.9	0	F4I9A2	F4I9A2	631	TNO1	TGN-related, localized SYP41 interacting protein
275395641326904	278358726501465	278105392456055	277259197235107	mRNA processing [GO:0006397];mRNA transport [GO:0051028];nuclear-transcribed mRNA catabolic process, nonsense-mediated decay [GO:0000184];positive regulation of gene expression [GO:0010628];regulation of alternative mRNA splicing, via spliceosome [GO:0000381];regulation of translation [GO:0006417];RNA splicing [GO:0008380]	cytoplasm [GO:0005737];cytosol [GO:0005829];exon-exon junction complex [GO:0035145];nuclear body [GO:0016604];nuclear speck [GO:0016607];nucleolus [GO:0005730];nucleoplasm [GO:0005654];nucleus [GO:0005634]	mRNA binding [GO:0003729]	6	0	34.505	86	23.3	23.3	28.2	28.7	F4I9J7	F4I9J7	632	Y14	RNA-binding protein Y14
236141414642334	239765739440918	242560920715332	NaN		chloroplast [GO:0009507]	ATP binding [GO:0005524];RNA binding [GO:0003723];RNA helicase activity [GO:0003724]	3	0.0025778	2.0958	3	0.7	0.7	0.7	0	F4I9Q5	F4I9Q5	633	At1g58060	DExH-box ATP-dependent RNA helicase DExH7, chloroplastic
NaN	258803100585938	NaN	261633853912354		mitochondrion [GO:0005739]		5	0	3.7604	11	0	0.3	0	0.3	F4I9T0	F4I9T0	634	BCHB	BEACH domain-containing protein B
245786533355713	258415813446045	249086647033691	252378673553467	phosphatidylinositol dephosphorylation [GO:0046856]		hydrolase activity [GO:0016787]	3	0.0020325	2.1656	7	1.7	2.9	1.7	1.5	F4IA20	F4IA20	636	At1g71710	DNAse I-like superfamily protein
253522529602051	24566801071167	245669174194336	253888664245605	adenine salvage [GO:0006168];GMP salvage [GO:0032263];guanine metabolic process [GO:0046098];guanine salvage [GO:0006178];hypoxanthine metabolic process [GO:0046100];IMP salvage [GO:0032264];purine ribonucleoside salvage [GO:0006166];seed germination [GO:0009845]	cytosol [GO:0005829]	guanine phosphoribosyltransferase activity [GO:0052657];hypoxanthine phosphoribosyltransferase activity [GO:0004422];magnesium ion binding [GO:0000287];nucleotide binding [GO:0000166]	3	0	11.851	18	19.2	7.6	19.2	13.6	F4IA25	F4IA25	637	HGPT	Hypoxanthine phosphoribosyltransferase
NaN	254925289154053	255552005767822	249341354370117	methylation [GO:0032259]		methyltransferase activity [GO:0008168]	6	0	50.453	10	0	12.9	12.9	9.9	F4IA48	F4IA48	638	At1g78150	N-lysine methyltransferase
243287563323975	244471416473389	245348682403564	245160503387451	starch biosynthetic process [GO:0019252]	chloroplast [GO:0009507]	glycogen (starch) synthase activity [GO:0004373];starch binding [GO:2001070];starch synthase activity [GO:0009011]	4	0	4.4516	7	2.7	1.7	1.7	1.7	F4IAG1	F4IAG1	641	SS3	Starch synthase 3
293414478302002	29090051651001	29717658996582	297312545776367	amine metabolic process [GO:0009308]	nucleus [GO:0005634]	copper ion binding [GO:0005507];primary amine oxidase activity [GO:0008131];quinone binding [GO:0048038]	21	0	89.202	160	27	25.3	26.6	24.8	F4IAX0	F4IAX0	644	At1g31690	Amine oxidase
288133869171143	293341960906982	292796993255615	293582954406738		integral component of membrane [GO:0016021];nucleus [GO:0005634]	ATP binding [GO:0005524];protein kinase activity [GO:0004672]	16	0	53.876	115	12.4	12.3	13.6	14.4	F4IB63	F4IB63	646	At1g51805	Leucine-rich repeat protein kinase family protein
238411502838135	NaN	26146333694458	NaN			kinase activity [GO:0016301]	10	0	43.209	39	3.4	0	8.2	0	F4IB68	F4IB68	647	At1g51840	Kinase-like protein
277652168273926	27532299041748	281308975219727	282288970947266		chloroplast [GO:0009507];cytoplasm [GO:0005737]	intramolecular transferase activity, phosphotransferases [GO:0016868]	16	0	32.761	121	28	15.5	16.6	24.5	F4IBB2	F4IBB2	650	At1g58280	Phosphoglycerate mutase-like protein 2
270129718780518	272798538208008	271075916290283	268926124572754	oxidation-reduction process [GO:0055114]	nucleus [GO:0005634]		8	0	5.7288	25	7.7	7.7	9.7	12	F4IBH8	F4IBH8	651	At1g65560	Zinc-binding dehydrogenase family protein
321162567138672	320401916503906	321989402770996	320073165893555			gamma-glutamyl-peptidase activity [GO:0034722]	25	0	323.31	471	67.3	58.3	64.9	64.9	F4IBT7	F4IBT7	652	GGH2	Folate gamma-glutamyl hydrolase
301134662628174	299728164672852	300613670349121	299122791290283	carbohydrate metabolic process [GO:0005975];pentose-phosphate shunt, non-oxidative branch [GO:0009052]	chloroplast [GO:0009507];chloroplast envelope [GO:0009941];chloroplast stroma [GO:0009570];extracellular region [GO:0005576]	sedoheptulose-7-phosphate:D-glyceraldehyde-3-phosphate glyceronetransferase activity [GO:0004801];zinc ion binding [GO:0008270]	22	0	240.92	257	32.1	34.4	33.7	32.1	F4IC59	F4IC59	653	At1g12230	Aldolase superfamily protein
NaN	242728424072266	238480453491211	242828426361084	microtubule-based movement [GO:0007018];regulation of microtubule-based process [GO:0032886];root development [GO:0048364]	microtubule [GO:0005874];preprophase band [GO:0009574]	ATP binding [GO:0005524];microtubule binding [GO:0008017];microtubule motor activity [GO:0003777]	5	0	8.442	10	0	1	2.7	1	F4IC87	F4IC87	654	ARK3	Kinesin-like protein
289140205383301	283016891479492	283123321533203	288309555053711		endosome [GO:0005768];Golgi apparatus [GO:0005794];integral component of membrane [GO:0016021];membrane [GO:0016020];plasma membrane [GO:0005886];trans-Golgi network [GO:0005802];vacuole [GO:0005773]		9	0	24.981	103	11.6	11.6	10	11.6	F4ICJ5	F4ICJ5	655	At1g25570	Di-glucose binding protein with Leucine-rich repeat domain-containing protein
177557735443115	175826263427734	187590618133545	178619956970215	defense response to fungus [GO:0050832];photomorphogenesis [GO:0009640]	chloroplast thylakoid membrane [GO:0009535];endoplasmic reticulum lumen [GO:0005788];nuclear envelope [GO:0005635];peroxisome [GO:0005777];secretory vesicle [GO:0099503];vacuole [GO:0005773]	calcium ion binding [GO:0005509]	21	0	118.8	56	3.6	3.6	5	3.6	F4ICX9	F4ICX9	656	TSA1	TSK-associating protein 1
NaN	263157386779785	NaN	273756732940674			transferase activity, transferring acyl groups other than amino-acyl groups [GO:0016747]	4	0	24.133	7	0	5.1	0	5.1	F4IDH0	F4IDH0	658	YUP8H12R.39	HXXXD-type acyl-transferase family protein
266314525604248	26903112411499	250857391357422	258961982727051		nucleus [GO:0005634]	chromatin binding [GO:0003682]	13	0	21.155	39	1.3	1.3	1	2.3	F4IDJ0	F4IDJ0	659	YUP8H12R.24	Binding protein
NaN	NaN	24375638961792	24909351348877	heat acclimation [GO:0010286];multicellular organism development [GO:0007275];nucleosome assembly [GO:0006334];nucleosome positioning [GO:0016584];positive regulation of cellular response to heat [GO:1900036];regulation of gene expression, epigenetic [GO:0040029];regulation of transcription, DNA-templated [GO:0006355];response to heat [GO:0009408]	cytosol [GO:0005829];nucleus [GO:0005634]	chromatin DNA binding [GO:0031490];histone binding [GO:0042393];metal ion binding [GO:0046872];promoter-specific chromatin binding [GO:1990841]	6	0.0059203	1.7121	7	0	0	1.3	1.3	F4IF36	F4IF36	666	FGT1	Protein FORGETTER 1
227489471435547	23070104598999	231415824890137	249229774475098	biosynthetic process [GO:0009058];regulation of L-ascorbic acid biosynthetic process [GO:2000082]		nucleotidyltransferase activity [GO:0016779]	18	0	56.238	76	11.6	11.6	12.6	15.3	F4IFA4	F4IFA4	667	At2g04650	ADP-glucose pyrophosphorylase family protein
292915592193604	294181823730469	2864626121521	290343322753906				7	0	46.751	63	47.3	38.9	38.9	38.9	F4IFA9	F4IFA9	668	At2g04690	Pyridoxamine 5'-phosphate oxidase family protein
283760452270508	281179809570313	283058700561523	279981422424316	embryo development ending in seed dormancy [GO:0009793];threonyl-tRNA aminoacylation [GO:0006435];tRNA aminoacylation for protein translation [GO:0006418]	chloroplast [GO:0009507];chloroplast stroma [GO:0009570];mitochondrion [GO:0005739]	aminoacyl-tRNA ligase activity [GO:0004812];ATP binding [GO:0005524];metal ion binding [GO:0046872];threonine-tRNA ligase activity [GO:0004829]	18	0	35.493	81	14.3	14	19.2	21.4	F4IFC5	F4IFC5	669	EMB2761	Threonine--tRNA ligase, chloroplastic/mitochondrial 2
255723915100098	257904453277588	255727386474609	258195323944092		nucleus [GO:0005634]	transaminase activity [GO:0008483]	5	0	9.7231	23	3.1	4.6	5.2	7.3	F4IFD0	F4IFD0	670	At2g04865	Protein MAIN-LIKE 2
218642730712891	227946739196777	NaN	NaN			GTP binding [GO:0005525];GTPase activity [GO:0003924]	60	0	270.04	311	1.3	1.3	0	0	F4IFG1	F4IFG1	671	DRP3B	Dynamin related protein
272229690551758	265081520080566	2651930809021	26616527557373		cytoplasm [GO:0005737]	aminopeptidase activity [GO:0004177]	29	0	34.355	28	57.8	48.6	56.5	52	F4IFH2	F4IFH2	672	PIP	Proline iminopeptidase
241213932037354	240283355712891	240614280700684	241385250091553	endocytic recycling [GO:0032456];endocytosis [GO:0006897];endoplasmic reticulum organization [GO:0007029];endoplasmic reticulum-plasma membrane tethering [GO:0061817];plasma membrane repair [GO:0001778];protein targeting to membrane [GO:0006612];response to cold [GO:0009409];response to mechanical stimulus [GO:0009612];transport of virus in host, cell to cell [GO:0046740]	cortical endoplasmic reticulum [GO:0032541];cytoplasmic side of plasma membrane [GO:0009898];endoplasmic reticulum [GO:0005783];endoplasmic reticulum-plasma membrane contact site [GO:0140268];endosome [GO:0005768];plasma membrane [GO:0005886];plasmodesma [GO:0009506];vacuole [GO:0005773]	phosphatidylinositol phosphate binding [GO:1901981]	4	0	3.2295	9	1.2	1.2	1.2	1.2	F4IFM6	F4IFM6	673	SYTA	Synaptotagmin A
315501384735107	320098876953125	310587882995605	310283489227295		extracellular region [GO:0005576]	serine-type endopeptidase activity [GO:0004252]	40	0	227.41	294	37.4	42.3	43	44.1	F4IG09	F4IG09	674	SBT4.1	Subtilisin-like protease SBT4.1
204534225463867	217263374328613	207270030975342	201967658996582				77	0	323.31	381	0.3	2	0.3	0.3	F4IG73	F4IG73	675	BCHC2	BEACH domain-containing protein C2
285593585968018	287806606292725	287547130584717	289938583374023	mRNA transport [GO:0051028];nuclear pore distribution [GO:0031081];protein import into nucleus [GO:0006606];regulation of transcription, DNA-templated [GO:0006355];RNA export from nucleus [GO:0006405];transcription-dependent tethering of RNA polymerase II gene DNA at nuclear periphery [GO:0000972]	membrane [GO:0016020];nuclear pore outer ring [GO:0031080]	structural constituent of nuclear pore [GO:0017056]	16	0	16.196	31	1.1	0.5	0.5	0.5	F4IGA5	F4IGA5	676	NUP133	Nuclear pore complex protein NUP133
NaN	209776401519775	216421375274658	NaN		ribosome [GO:0005840]		19	0	200.18	61	0	12.1	12.1	0	F4IHJ8	F4IHJ8	679	At2g21580	40S ribosomal protein S25
257123241424561	259978084564209	257719058990479	257494983673096	rRNA processing [GO:0006364]	nucleolus [GO:0005730]		8	0	5.5013	26	3	2.1	1.1	2.1	F4IHU8	F4IHU8	681	At2g34357	ARM repeat superfamily protein
291751003265381	290423393249512	291837139129639	290955696105957			ATP binding [GO:0005524];protein kinase activity [GO:0004672]	41	0	209.26	297	22.6	23.4	19.8	24.7	F4II29	F4II29	682	CTEXP	Kinase family with ARM repeat domain-containing protein
231438102722168	232807922363281	NaN	233649291992188			UDP-glycosyltransferase activity [GO:0008194]	38	0	29.378	54	14.8	10.1	13.6	12.3	F4IIG3	F4IIG3	685	UGT73B5	Glycosyltransferase
260785503387451	258343906402588	282175254821777	246767520904541	anisotropic cell growth [GO:0051211];anther dehiscence [GO:0009901];cellulose biosynthetic process [GO:0030244];cellulose microfibril organization [GO:0010215];cortical microtubule organization [GO:0043622];gynoecium development [GO:0048467];plant-type primary cell wall biogenesis [GO:0009833];pollen tube development [GO:0048868];pollen wall assembly [GO:0010208];protein localization to cortical …	cellulose synthase complex [GO:0010330];cortical microtubule [GO:0055028];cytoplasm [GO:0005737];cytoplasmic side of plasma membrane [GO:0009898];cytosol [GO:0005829];Golgi apparatus [GO:0005794];microtubule minus-end [GO:0036449];plasma membrane [GO:0005886];plasmodesma [GO:0009506]	microtubule binding [GO:0008017]	73	0	323.31	363	0.9	1	0.6	1.9	F4IIM1	F4IIM1	686	CSI1	Protein CELLULOSE SYNTHASE INTERACTIVE 1
263175525665283	259084358215332	26099588394165	25602294921875	regulation of phosphoprotein phosphatase activity [GO:0043666]		protein phosphatase binding [GO:0019903];protein phosphatase regulator activity [GO:0019888]	14	0	55.077	41	1.3	2.8	1.3	2.8	F4IIN7	F4IIN7	687	At2g28360	SIT4 phosphatase-associated family protein
305511474609375	307244396209717	306483020782471	308448314666748	carbohydrate metabolic process [GO:0005975]		beta-galactosidase activity [GO:0004565];carbohydrate binding [GO:0030246]	43	0	323.31	354	36.1	33.3	33.7	38.2	F4IIQ3	F4IIQ3	688	BGAL8	Beta-galactosidase
275644187927246	2765478515625	272143783569336	277881813049316	cell cycle [GO:0007049];cell division [GO:0051301];lateral root morphogenesis [GO:0010102];response to auxin [GO:0009733]	cortical microtubule [GO:0055028];phragmoplast [GO:0009524];plasma membrane [GO:0005886];plasmodesma [GO:0009506];preprophase band [GO:0009574]		23	0	33.241	92	7.1	7.2	4.1	5.5	F4IIU4	F4IIU4	689	AIR9	187-kDa microtubule-associated protein AIR9
316188125610352	320014228820801	319809398651123	318752918243408			serine-type carboxypeptidase activity [GO:0004185]	21	0	323.31	462	42	49.5	43.6	43.6	F4IKK4	F4IKK4	691	SNG1	Sinapoylglucose 1
246003684997559	245514507293701	24657527923584	247060928344727				6	0	6.709	5	21.5	21.5	16.9	16.2	F4IKL8	F4IKL8	692	At2g29310	NAD(P)-binding Rossmann-fold superfamily protein
304905624389648	307735252380371	306394462585449	308969192504883		cytosol [GO:0005829];peroxisome [GO:0005777]	oxidoreductase activity [GO:0016491]	18	0	323.31	194	44	48.5	57.3	57.3	F4IKM1	F4IKM1	693	At2g29340	Tropinone reductase homolog At2g29340
232453956604004	210916500091553	NaN	NaN		cytosol [GO:0005829];mitochondrion [GO:0005739];nucleus [GO:0005634];plasma membrane [GO:0005886]		33	0	277.68	160	1.3	0.8	0	0	F4IL68	F4IL68	695	At2g07360	SH3 domain-containing protein
236223201751709	246263370513916	242392883300781	243695278167725	mRNA processing [GO:0006397]	nucleus [GO:0005634]	RNA binding [GO:0003723]	13	0	83.393	63	2	4	4	4	F4ILE0	F4ILE0	697	At2g16940	Splicing factor, CC1-like protein
213602466583252	22490104675293	226614685058594	NaN	anther wall tapetum development [GO:0048658];cellular response to reactive oxygen species [GO:0034614];chloroplast disassembly [GO:1904821];protein ubiquitination [GO:0016567];root development [GO:0048364]	cytoplasm [GO:0005737]	ubiquitin protein ligase activity [GO:0061630]	14	0	52.761	37	1.3	1.3	1.3	0	F4ILG6	F4ILG6	698	PUB4	RING-type E3 ubiquitin transferase
287042789459229	282321033477783	289121932983398	290141696929932	microtubule-based movement [GO:0007018]		ATP binding [GO:0005524];microtubule binding [GO:0008017];microtubule motor activity [GO:0003777]	7	0	5.0343	41	1.3	2	2	2	F4ILV6	F4ILV6	699	At2g36200	P-loop containing nucleoside triphosphate hydrolases superfamily protein
265204486846924	266548538208008	263629913330078	268793506622314	biosynthetic process [GO:0009058]		transferase activity [GO:0016740]	9	0	18.388	83	12.7	15.2	11.1	12.7	F4IM97	F4IM97	700	At2g01220	Nucleotidylyl transferase superfamily protein
250409717559814	248203125	249265556335449	327421798706055		mitochondrion [GO:0005739]	magnesium ion binding [GO:0000287]	7	0	47.088	8	34.5	34.5	34.5	37.9	F4INE2	F4INE2	703	At2g07732	Ribulose bisphosphate carboxylase large chain, catalytic domain-containing protein
NaN	NaN	24875207901001	247556743621826	DNA replication initiation [GO:0006270]	MCM complex [GO:0042555];nucleus [GO:0005634]	ATP binding [GO:0005524];DNA helicase activity [GO:0003678];DNA replication origin binding [GO:0003688]	8	0	16.108	25	0	0	1.5	1.5	F4INF9	F4INF9	704	MCM5	DNA helicase
256597061157227	259501361846924	253900489807129	256379337310791			ribonuclease activity [GO:0004540];RNA binding [GO:0003723]	10	0	32.112	47	1	1.9	1	1	F4INI6	F4INI6	705	EMB2763	Ribonuclease II family protein
299338207244873	299377536773682	297942676544189	299550457000732	post-embryonic root development [GO:0048528]	cytoplasm [GO:0005737];cytosol [GO:0005829];nucleus [GO:0005634];plasma membrane [GO:0005886]	calcium ion binding [GO:0005509]	22	0	279.58	238	56.9	59.4	54	56.9	F4IP55	F4IP55	706	GRF9	General regulatory factor 9
NaN	249072437286377	251090087890625	249955883026123	endoplasmic reticulum to Golgi vesicle-mediated transport [GO:0006888];protein exit from endoplasmic reticulum [GO:0032527];protein maturation [GO:0051604];vesicle docking involved in exocytosis [GO:0006904]	cytoplasm [GO:0005737]		5	0	21.874	6	0	0.9	0.9	0.9	F4IP68	F4IP68	707	MAG2-interacting protein 3	Vesicle docking protein
232662792205811	23294319152832	237154445648193	224845848083496			RNA binding [GO:0003723]	8	0	10.657	46	3.6	3.6	3.6	1.6	F4IP94	F4IP94	708	ML2	MEI2-like 2
270668163299561	272166004180908	272570991516113	271068935394287	phosphatidylinositol biosynthetic process [GO:0006661];pollen development [GO:0009555];vacuole organization [GO:0007033]	mitochondrion [GO:0005739];PAS complex [GO:0070772];vacuolar membrane [GO:0005774]		18	0	91.864	116	0.9	2	3.5	2.4	F4IPA6	F4IPA6	709	At2g01690	ARM repeat superfamily protein
227946949005127	NaN	NaN	277459907531738			GTP binding [GO:0005525];GTPase activity [GO:0003924];translation elongation factor activity [GO:0003746]	27	0	166.26	146	5.8	0	2.1	3.3	F4IPW4	F4IPW4	711	EMB2785	Elongation factor family protein
301196632385254	301062450408936	301573791503906	302731990814209	cristae formation [GO:0042407];cysteinyl-tRNA aminoacylation [GO:0006423];polar nucleus fusion [GO:0010197];regulation of programmed cell death [GO:0043067]	chloroplast [GO:0009507];chloroplast stroma [GO:0009570];cytoplasm [GO:0005737];cytosol [GO:0005829];mitochondrion [GO:0005739]	ATP binding [GO:0005524];cysteine-tRNA ligase activity [GO:0004817];metal ion binding [GO:0046872]	31	0	188.02	270	41.2	39.4	44.2	46.4	F4IPY2	F4IPY2	712	SYCO	Cysteine--tRNA ligase, chloroplastic/mitochondrial
279244499206543	278228054046631	27820068359375	279672470092773	hydrogen peroxide catabolic process [GO:0042744];response to oxidative stress [GO:0006979]	extracellular region [GO:0005576]	heme binding [GO:0020037];metal ion binding [GO:0046872];peroxidase activity [GO:0004601]	20	0	139.72	133	27.7	25.7	29.7	29.7	F4IQ05	F4IQ05	713	At2g37130	Peroxidase
26950159072876	273754234313965	277825679779053	278305625915527	miRNA loading onto RISC involved in gene silencing by miRNA [GO:0035280];protein import into nucleus [GO:0006606]	cytoplasm [GO:0005737];cytosol [GO:0005829];nuclear envelope [GO:0005635];nucleus [GO:0005634]	Ran GTPase binding [GO:0008536]	39	0	164.32	261	8.1	8.5	5.7	6.7	F4IRR2	F4IRR2	718	SAD2	Importin beta-like SAD2
NaN	240228443145752	238185081481934	NaN	red or far-red light signaling pathway [GO:0010017]	endoplasmic reticulum [GO:0005783];Golgi apparatus [GO:0005794];plasma membrane [GO:0005886];vacuole [GO:0005773]	heme binding [GO:0020037]	9	0	13.385	28	0	3.7	3.7	0	F4IRX7	F4IRX7	719	SOUL-1	SOUL heme-binding family protein
NaN	265142593383789	256424026489258	257769832611084	regulation of transcription, DNA-templated [GO:0006355];response to salt stress [GO:0009651];sodium ion homeostasis [GO:0055078]	cytosol [GO:0005829];nucleus [GO:0005634]	calcium ion binding [GO:0005509];nuclear receptor transcription coactivator activity [GO:0030374]	15	0	10.856	31	0	3.7	1.9	2.3	F4IS91	F4IS91	720	RSA1	Protein SHORT ROOT IN SALT MEDIUM 1
253689632415771	253917541503906	253038597106934	255005435943604			ATP binding [GO:0005524];protein kinase activity [GO:0004672]	2	0.0088246	1.5239	3	1.5	1.5	1.5	1.5	F4ISN4	F4ISN4	721	At2g25750	Protein kinase family protein
281376056671143	277553825378418	276445083618164	271052951812744	methylation [GO:0032259]		methyltransferase activity [GO:0008168]	10	0	21.374	47	12.5	12.7	15.8	11.4	F4IST0	F4IST0	722	At2g32160	S-adenosyl-L-methionine-dependent methyltransferases superfamily protein
2619215965271	266932525634766	266522579193115	269540481567383	methylation [GO:0032259]		S-adenosylmethionine-dependent methyltransferase activity [GO:0008757]	9	0	33.734	33	9.5	8.6	8.9	14.2	F4IST2	F4IST2	723	At2g32170	S-adenosyl-L-methionine-dependent methyltransferases superfamily protein
29755350112915	298544807434082	298977851867676	297188835144043	defense response to fungus, incompatible interaction [GO:0009817];response to abscisic acid [GO:0009737];response to cadmium ion [GO:0046686]	endoplasmic reticulum [GO:0005783];membrane [GO:0016020];plasma membrane [GO:0005886]		119	0	323.31	759	27.2	26.6	26.4	23.3	F4ISU2	F4ISU2	724	At2g32240	Early endosome antigen
237447853088379	235481624603271	244365711212158	240272407531738			pyridoxal phosphate binding [GO:0030170];transaminase activity [GO:0008483]	11	0	15.858	27	2.4	3.2	4.7	2.4	F4ISY3	F4ISY3	725	AGT3	Alanine:glyoxylate aminotransferase 3
301797332763672	300045051574707	300824584960938	301680603027344		chloroplast [GO:0009507];chloroplast stroma [GO:0009570];cytosol [GO:0005829]		17	0	289.55	228	37.4	47.8	41.2	44.3	F4IT21	F4IT21	726	At2g43945	Uncharacterized protein
NaN	232332878112793	235749626159668	237000713348389			ubiquitin-like modifier activating enzyme activity [GO:0008641]	6	0	4.333	6	0	2.4	2.4	2.4	F4ITQ5	F4ITQ5	728	AXL	AXR1-like protein
2685768699646	266302032470703	269660930633545	268469696044922			ATP binding [GO:0005524];metal ion binding [GO:0046872];phosphoprotein phosphatase activity [GO:0004721];protein kinase activity [GO:0004672]	2	0.0020336	2.1708	3	1.9	1.9	1.9	1.9	F4IUD7	F4IUD7	729	At2g20050	Protein phosphatase 2C and cyclic nucleotide-binding/kinase domain-containing protein
268246879577637	267058277130127	267497024536133	26799711227417				4	0	44.104	40	16.6	11.5	16.6	16.6	F4IUJ0	F4IUJ0	731	At2g26340	Uncharacterized protein
200180797576904	203109683990479	203581008911133	214109020233154	defense response to bacterium [GO:0042742];jasmonic acid mediated signaling pathway [GO:0009867];long-day photoperiodism [GO:0048571];nuclear-transcribed mRNA catabolic process, nonsense-mediated decay [GO:0000184];response to wounding [GO:0009611];salicylic acid mediated signaling pathway [GO:0009863]	cytoplasm [GO:0005737];exon-exon junction complex [GO:0035145];nucleolus [GO:0005730];perinuclear region of cytoplasm [GO:0048471];polysome [GO:0005844]	mRNA binding [GO:0003729]	22	0	45.534	66	1	2.1	2.1	2.8	F4IUX6	F4IUX6	732	UPF2	Regulator of nonsense transcripts UPF2
291470527648926	301054954528809	29720874786377	300986099243164				21	0	127.47	168	32.8	41.6	37.4	44.2	F4IV18	F4IV18	733	At2g44760	Dihydroorotate dehydrogenase (DUF3598)
230833301544189	235527420043945	NaN	NaN	chromatin organization [GO:0006325]	nucleus [GO:0005634];plasmodesma [GO:0009506]	ATP binding [GO:0005524];DNA binding [GO:0003677];helicase activity [GO:0004386]	3	0.0011265	2.42	8	0.7	0.7	0	0	F4IV99	F4IV99	734	CHR5	Protein CHROMATIN REMODELING 5
24903112411499	251830978393555	254485282897949	252706356048584	amyloplast organization [GO:0009660];cell division [GO:0051301];embryo development ending in seed dormancy [GO:0009793];embryonic axis specification [GO:0000578];endocytosis [GO:0006897];endosome organization [GO:0007032];late endosome to vacuole transport [GO:0045324];negative gravitropism [GO:0009959];phototropism [GO:0009638];protein targeting to vacuole [GO:0006623];receptor-mediated endocyto…	endoplasmic reticulum [GO:0005783];endosome membrane [GO:0010008];Golgi apparatus [GO:0005794];intracellular membrane-bounded organelle [GO:0043231];late endosome [GO:0005770];late endosome membrane [GO:0031902];peroxisome [GO:0005777];trans-Golgi network [GO:0005802];vacuolar membrane [GO:0005774];vacuole [GO:0005773]		12	0	18.097	58	0.5	0.5	0.5	0.5	F4IVL6	F4IVL6	735	GRV2	DnaJ homolog subfamily C GRV2
225100250244141	226294536590576	NaN	225842380523682		commitment complex [GO:0000243];nuclear speck [GO:0016607];U2AF [GO:0089701];U2-type prespliceosome [GO:0071004]	poly-pyrimidine tract binding [GO:0008187];pre-mRNA 3'-splice site binding [GO:0030628]	1	0	3.296	21	1.1	1.1	0	1.1	F4IVU7	F4IVU7	736	At2g33435	RNA-binding (RRM/RBD/RNP motifs) family protein
294793109893799	296995220184326	308016242980957	290657901763916	pentose-phosphate shunt [GO:0006098];reductive pentose-phosphate cycle [GO:0019253];response to cadmium ion [GO:0046686]	chloroplast [GO:0009507];chloroplast stroma [GO:0009570];chloroplast thylakoid membrane [GO:0009535];cytosol [GO:0005829];plastid [GO:0009536]	metal ion binding [GO:0046872];transketolase activity [GO:0004802]	63	0	323.31	366	35.2	29.4	36.3	36.8	F4IW47	F4IW47	739	TKL-2	Transketolase-2, chloroplastic
NaN	245047607421875	245047607421875	243488140106201	tRNA processing [GO:0008033];tRNA splicing, via endonucleolytic cleavage and ligation [GO:0006388]		NAD+ ADP-ribosyltransferase activity [GO:0003950];tRNA 2'-phosphotransferase activity [GO:0000215]	7	0	26.85	20	3.5	8.3	7.3	8.3	F4IW51	F4IW51	740	emb1067	RNA 2'-phosphotransferase, Tpt1 / KptA family
249801540374756	248781127929688	251438655853271	252888736724854		Golgi apparatus [GO:0005794];integral component of membrane [GO:0016021]	O-acetyltransferase activity [GO:0016413]	4	0	5.6533	24	2.5	5.9	7.3	13.2	F4IWA8	F4IWA8	741	TBL41	Protein trichome birefringence-like 41
332099609375	332831993103027	332026519775391	33219856262207	tricarboxylic acid cycle [GO:0006099]	cytosol [GO:0005829];mitochondrion [GO:0005739];oxoglutarate dehydrogenase complex [GO:0045252]	cobalt ion binding [GO:0050897];oxoglutarate dehydrogenase (succinyl-transferring) activity [GO:0004591];thiamine pyrophosphate binding [GO:0030976];zinc ion binding [GO:0008270]	110	0	323.31	2173	63.6	61.2	63.2	64.8	F4IWV2	F4IWV2	743	At3g55410	2-oxoglutarate dehydrogenase, E1 component
271318302154541	27607666015625	277095794677734	279407253265381				32	0	60.29	109	2.6	2.6	1.2	1.9	F4IX23	F4IX23	745	At3g62010	Metal ion-binding protein
231894397735596	239382247924805	214783267974854	224586887359619	defense response to bacterium [GO:0042742];endocytosis [GO:0006897];immune response [GO:0006955];innate immune response [GO:0045087];protein transport [GO:0015031];regulation of ARF protein signal transduction [GO:0032012];vesicle-mediated transport [GO:0016192];viral process [GO:0016032]	cytosol [GO:0005829];early endosome [GO:0005769];early endosome membrane [GO:0031901];trans-Golgi network [GO:0005802]	ARF guanyl-nucleotide exchange factor activity [GO:0005086]	122	0	323.31	685	4.4	5.5	3.9	2	F4IXW2	F4IXW2	748	BIG5	Brefeldin A-inhibited guanine nucleotide-exchange protein 5
252550830841064	265724353790283	261834774017334	261711578369141				12	0	150.32	80	21.1	16.5	23.7	10	F4IY75	F4IY75	749	At3g56130	Biotin/lipoyl attachment domain-containing protein
29974458694458	299436340332031	300145168304443	29908561706543	histidyl-tRNA aminoacylation [GO:0006427];mitochondrial translation [GO:0032543]	cytoplasm [GO:0005737];cytosol [GO:0005829];mitochondrion [GO:0005739]	ATP binding [GO:0005524];histidine-tRNA ligase activity [GO:0004821]	73	0	323.31	540	27.5	28.4	40.5	36.2	F4IYF8	F4IYF8	750	At3g02760	Histidine--tRNA ligase, cytoplasmic
256685791015625	255969905853271	253381061553955	256635112762451		chloroplast [GO:0009507]	ATP binding [GO:0005524];D-alanine-D-alanine ligase activity [GO:0008716];metal ion binding [GO:0046872]	7	0	3.7216	12	2.1	3.6	2.1	3	F4IYI8	F4IYI8	751	At3g08840	D-alanine-D-alanine ligase family
280023880004883	28871618270874	285254459381104	284342803955078	protein import into nucleus [GO:0006606]	cytoplasm [GO:0005737];cytosol [GO:0005829];nucleus [GO:0005634]	nuclear import signal receptor activity [GO:0061608];nuclear localization sequence binding [GO:0008139];Ran GTPase binding [GO:0008536]	41	0	323.31	311	13.3	15.8	14	15.3	F4IYK3	F4IYK3	752	At3g08943	ARM repeat superfamily protein
253594760894775	272665119171143	258464202880859	264691753387451	7-methylguanosine mRNA capping [GO:0006370];DNA recombination [GO:0006310];DNA repair [GO:0006281]	host cell nucleus [GO:0042025];plasmodesma [GO:0009506]	ATP binding [GO:0005524];DNA ligase (ATP) activity [GO:0003910];GTP binding [GO:0005525];mRNA guanylyltransferase activity [GO:0004484];polynucleotide 5'-phosphatase activity [GO:0004651];protein tyrosine phosphatase activity [GO:0004725];protein tyrosine/serine/threonine phosphatase activity [GO:0008138]	6	0.0011253	2.4081	22	3.3	1.6	3.3	2.8	F4IYM6	F4IYM6	754	At3g09100	mRNA capping enzyme family protein
278024272918701	277502155303955	277635726928711	277742958068848				22	0	48.169	144	16.1	14.7	16.6	16.4	F4IYR7;Q9SRD0	F4IYR7	755	At3g15410	Leucine-rich repeat (LRR) family protein
250419731140137	249770545959473	NaN	262833557128906				5	0	7.9091	27	11.6	4.5	0	5.1	F4IZI7	F4IZI7	757	AtATG18a	Transducin/WD40 repeat-like superfamily protein
260296630859375	259739055633545	NaN	261404361724854	embryo sac development [GO:0009553];mRNA transport [GO:0051028];pollen development [GO:0009555];pollen germination [GO:0009846];pollen tube growth [GO:0009860];regulation of protein export from nucleus [GO:0046825];ribosomal large subunit export from nucleus [GO:0000055];ribosomal small subunit export from nucleus [GO:0000056]	cytoplasm [GO:0005737];nuclear membrane [GO:0031965];nuclear pore [GO:0005643];nucleus [GO:0005634];plasmodesma [GO:0009506]	nuclear export signal receptor activity [GO:0005049];Ran GTPase binding [GO:0008536]	23	0	19.224	30	6.7	5.7	4.7	4.9	F4IZR5	F4IZR5	758	XPO1B	Protein EXPORTIN 1B
19997278213501	199676151275635	197167415618896	NaN	double fertilization forming a zygote and endosperm [GO:0009567];mRNA splice site selection [GO:0006376]	cytosol [GO:0005829];U1 snRNP [GO:0005685]	mRNA binding [GO:0003729]	16	0	31.466	57	2	2	2	2.2	F4IZU3	F4IZU3	759	UNE6	LUC7 related protein
263608169555664	260283145904541	265859184265137	264281578063965		chloroplast [GO:0009507]		6	0	72.807	21	19.5	12.2	5.3	24	F4IZV9	F4IZV9	760	At3g09250	Nuclear transport factor 2 (NTF2) family protein
236546897888184	23182409286499	240487651824951	240305271148682	cell cycle [GO:0007049];cell division [GO:0051301];cytoplasmic mRNA processing body assembly [GO:0033962];deadenylation-dependent decapping of nuclear-transcribed mRNA [GO:0000290];mRNA processing [GO:0006397];stem cell population maintenance [GO:0019827]	endoplasmic reticulum [GO:0005783];nucleus [GO:0005634];P-body [GO:0000932]	RNA binding [GO:0003723]	5	0	4.1249	20	1.2	2.6	1.2	1.2	F4J077	F4J077	761	PAT1H1	Protein PAT1 homolog 1
239097633361816	219682121276855	209267997741699	221495132446289	autophagosome assembly [GO:0000045];pollen development [GO:0009555]	autophagosome membrane [GO:0000421];cytosol [GO:0005829];integral component of membrane [GO:0016021];plasma membrane [GO:0005886]		52	0	310.16	225	3.2	1.4	0.4	2	F4J0P2	F4J0P2	763	At3g50590	Transducin/WD40 repeat-like superfamily protein
301841163635254	303085613250732	299450302124023	301975345611572	starch catabolic process [GO:0005983]	chloroplast [GO:0009507];chloroplast starch grain [GO:0009569];chloroplast stroma [GO:0009570];starch grain [GO:0043036]	carbohydrate phosphatase activity [GO:0019203];protein tyrosine/serine/threonine phosphatase activity [GO:0008138]	25	0	102.74	199	30.1	25.7	27.6	23.4	F4J117	F4J117	765	LSF1	Phosphoglucan phosphatase LSF1, chloroplastic
258496208190918	264009990692139	266519832611084	260959720611572	transcription, DNA-templated [GO:0006351]	cytosol [GO:0005829];nucleus [GO:0005634]	transcription corepressor activity [GO:0003714]	11	0	12.1	55	3.3	4.9	5.1	5.1	F4J153	F4J153	767	At3g03570	Signal transducer, putative (DUF3550/UPF0682)
317846450805664	313363380432129	319024295806885	310333480834961	cell division [GO:0051301];chloroplast fission [GO:0010020];regulation of division septum assembly [GO:0032955]	chloroplast inner membrane [GO:0009706]		27	0	323.31	356	53.8	64.9	53.8	54.8	F4J1U2	F4J1U2	768	At3g29185	Glutamate NMDA receptor subunit epsilon-1, putative (DUF3598)
321676712036133	312890110015869	32372932434082	322044334411621	carbohydrate metabolic process [GO:0005975];response to bacterium [GO:0009617]	anchored component of plasma membrane [GO:0046658];apoplast [GO:0048046];cell wall [GO:0005618];endoplasmic reticulum [GO:0005783];secretory vesicle [GO:0099503]	cellulase activity [GO:0008810];glucan endo-1,3-beta-D-glucosidase activity [GO:0042973]	20	0	323.31	259	70.4	77.7	68	78	F4J270	F4J270	769	BG3	Probable glucan endo-1,3-beta-glucosidase BG3
260834064483643	263859577178955	266106262207031	264265441894531	folic acid-containing compound biosynthetic process [GO:0009396];one-carbon metabolic process [GO:0006730];photorespiration [GO:0009853];seedling development [GO:0090351];tetrahydrofolylpolyglutamate biosynthetic process [GO:0046901]	cytoplasm [GO:0005737];cytosol [GO:0005829];mitochondrial inner membrane [GO:0005743];mitochondrial matrix [GO:0005759];mitochondrion [GO:0005739]	ATP binding [GO:0005524];metal ion binding [GO:0046872];tetrahydrofolylpolyglutamate synthase activity [GO:0004326]	6	0	8.9907	36	8.5	5.6	6.6	7	F4J2K2	F4J2K2	770	FPGS2	Folylpolyglutamate synthase
27513973236084	27946928024292	275189342498779	27928409576416	mature ribosome assembly [GO:0042256]	cytosol [GO:0005829];ribonucleoprotein complex [GO:1990904];ribosome [GO:0005840]	GTP binding [GO:0005525];GTPase activity [GO:0003924];ribosome binding [GO:0043022];translation elongation factor activity [GO:0003746]	26	0	87.747	167	11.9	11.9	9.2	13.5	F4J2T9	F4J2T9	771	At3g22980	Ribosomal protein S5/Elongation factor G/III/V family protein
258127689361572	236280078887939	228295059204102	233691959381104	nucleotide metabolic process [GO:0009117]		guanylate kinase activity [GO:0004385]	8	0	21.727	36	4.9	5.1	4.9	4.9	F4J3E9	F4J3E9	775	AGK2	Guanylate kinase
282680759429932	282335681915283	284309768676758	285818672180176	carbohydrate metabolic process [GO:0005975]	vacuolar membrane [GO:0005774]	lyase activity [GO:0016829];polygalacturonase activity [GO:0004650]	10	0	60.305	133	21.2	16.7	18.2	18.2	F4J3I0	F4J3I0	776	At3g57790	Pectin lyase-like superfamily protein
290764560699463	290355377197266	288719711303711	290383930206299	peptidyl-diphthamide biosynthetic process from peptidyl-histidine [GO:0017183]		diphthine-ammonia ligase activity [GO:0017178]	21	0	131.6	170	18.8	23.1	18.7	18.9	F4J3Q1	F4J3Q1	778	At3g04480	Endoribonuclease
260108394622803	256831665039063	259897556304932	258726043701172			serine-type carboxypeptidase activity [GO:0004185]	8	0	17.296	20	14.2	10.9	14.5	14.5	F4J3S3	F4J3S3	779	SCPL7	Serine carboxypeptidase-like 7
29771354675293	303321285247803	295766506195068	296464328765869	tryptophanyl-tRNA aminoacylation [GO:0006436]		ATP binding [GO:0005524];transferase activity [GO:0016740];tryptophan-tRNA ligase activity [GO:0004830]	23	0	65.668	128	22.6	26.4	26.1	28.6	F4J4T3	F4J4T3	783	At3g04600	Nucleotidylyl transferase superfamily protein
244798812866211	NaN	NaN	2460178565979			kinase activity [GO:0016301];polysaccharide binding [GO:0030247]	1	0	27.733	6	7.3	0	0	7.3	F4J551	F4J551	785	At3g17350	Wall-associated receptor kinase carboxy-terminal protein
252333030700684	248296318054199	256719570159912	24856761932373			metal ion binding [GO:0046872];RNA binding [GO:0003723]	5	0	5.5136	16	1.1	1.1	1.1	1.9	F4J5A7	F4J5A7	786	At3g23900	RNA recognition motif (RRM)-containing protein
NaN	NaN	259337539672852	254682426452637	regulation of phosphoprotein phosphatase activity [GO:0043666]		protein phosphatase binding [GO:0019903];protein phosphatase regulator activity [GO:0019888]	30	0	248.97	150	0	0	4.7	3	F4J5I0	F4J5I0	787	At3g45190	SIT4 phosphatase-associated family protein
252135639190674	255287418365479	NaN	25147518157959	clathrin coat assembly [GO:0048268];clathrin-dependent endocytosis [GO:0072583];intracellular protein transport [GO:0006886]	clathrin coat of coated pit [GO:0030132];clathrin coat of trans-Golgi network vesicle [GO:0030130];clathrin vesicle coat [GO:0030125];cytosol [GO:0005829];plasma membrane [GO:0005886]	clathrin heavy chain binding [GO:0032050];structural molecule activity [GO:0005198]	6	0	36.01	19	3.1	3.1	0	3.1	F4J5M9	F4J5M9	788	At3g51890	Clathrin light chain 3
293854351043701	292234306335449	294476623535156	293380069732666	intracellular distribution of mitochondria [GO:0048312];positive regulation of mitochondrial fusion [GO:0010636]	cytosol [GO:0005829];plasma membrane [GO:0005886]	RNA binding [GO:0003723]	79	0	323.31	717	26.8	20.9	22.7	22.6	F4J5R9	F4J5R9	790	NOXY38	Clustered mitochondria protein homolog
283827381134033	282737312316895	285328559875488	282528209686279		cytosol [GO:0005829];mitochondrion [GO:0005739]	ATP binding [GO:0005524];transferase activity, transferring acyl groups [GO:0016746]	45	0	323.31	439	22.7	16.5	20.2	19.4	F4J5T2	F4J5T2	791	LTA3	Dihydrolipoamide acetyltransferase component of pyruvate dehydrogenase complex
288619804382324	29026912689209	286869564056396	290133457183838	formation of cytoplasmic translation initiation complex [GO:0001732]	cytosol [GO:0005829];eukaryotic 43S preinitiation complex [GO:0016282];eukaryotic 48S preinitiation complex [GO:0033290];eukaryotic translation initiation factor 3 complex [GO:0005852];plasma membrane [GO:0005886]	mRNA binding [GO:0003729];translation initiation factor activity [GO:0003743]	23	0	198.61	185	19.9	27.7	24.9	36.1	F4J6A1	F4J6A1	792	EIF3G1	Eukaryotic translation initiation factor 3 subunit G
29376293182373	293640689849854	295533638000488	291708335876465	chromatin silencing [GO:0006342];embryo development ending in seed dormancy [GO:0009793];leaf development [GO:0048366];regulation of flower development [GO:0009909];shoot apical meristem development [GO:1902182]	cytosol [GO:0005829]	DNA binding [GO:0003677]	35	0	76.659	285	34.5	34	31.8	36.9	F4J6A8	F4J6A8	793	At3g11450	DnaJ and Myb-like DNA-binding domain-containing protein
278774223327637	28076379776001	277700157165527	256026630401611	intracellular signal transduction [GO:0035556];peptidyl-serine phosphorylation [GO:0018105];protein autophosphorylation [GO:0046777];regulation of growth [GO:0040008]	cytosol [GO:0005829];plasma membrane [GO:0005886];root hair [GO:0035618]	ATP binding [GO:0005524];kinase activity [GO:0016301];metal ion binding [GO:0046872];protein serine/threonine kinase activity [GO:0004674]	15	0	21.801	40	1.1	1.1	1.1	1.9	F4J6F6	F4J6F6	794	IREH1	Probable serine/threonine protein kinase IREH1
NaN	240576324462891	242005271911621	236669826507568	ubiquinone biosynthetic process [GO:0006744]	extrinsic component of mitochondrial inner membrane [GO:0031314];mitochondrion [GO:0005739]	FAD binding [GO:0071949];oxidoreductase activity [GO:0016491];oxidoreductase activity, acting on paired donors, with incorporation or reduction of molecular oxygen, NAD(P)H as one donor, and incorporation of one atom of oxygen [GO:0016709];oxidoreductase activity, acting on paired donors, with incorporation or reduction of molecular oxygen, reduced flavin or flavoprotein as one donor, and incorpo…	9	0	34.26	31	0	7.3	5.5	2.6	F4J6I6	F4J6I6	795	COQ6	Ubiquinone biosynthesis monooxygenase COQ6, mitochondrial
277051029205322	276706733703613	275214824676514	271647090911865	protein import into nucleus [GO:0006606]	cytosol [GO:0005829];nuclear envelope [GO:0005635]	Ran GTPase binding [GO:0008536]	44	0	323.31	315	11.6	12.6	7.6	7.8	F4J738;REV__Q9M0M4	F4J738	796	At3g59020	Importin beta-like SAD2 homolog
266308975219727	273759212493896	27636302947998	275803928375244	actin cytoskeleton organization [GO:0030036];actin filament capping [GO:0051693];actin filament organization [GO:0007015];barbed-end actin filament capping [GO:0051016]	F-actin capping protein complex [GO:0008290];nucleus [GO:0005634]	actin filament binding [GO:0051015]	6	0	9.6136	44	5.2	14.9	9.9	14.9	F4J7C4	F4J7C4	797	CPA	Subunits of heterodimeric actin filament capping protein Capz superfamily
281064453125	278687362670898	280418701171875	280288639068604	protein deubiquitination [GO:0016579];ubiquitin-dependent protein catabolic process [GO:0006511]		thiol-dependent ubiquitinyl hydrolase activity [GO:0036459]	99	0	253.81	310	34.2	35.9	34.1	33.9	F4J7I2	F4J7I2	798	UBP13	Ubiquitin-specific protease 13
22285737991333	235581245422363	240852928161621	237526664733887	endocytosis [GO:0006897];pollen development [GO:0009555]	cell plate [GO:0009504];cytoplasm [GO:0005737];cytoskeleton [GO:0005856];cytosol [GO:0005829];nucleus [GO:0005634];phragmoplast [GO:0009524];plasma membrane [GO:0005886];plasmodesma [GO:0009506]	identical protein binding [GO:0042802]	52	0	323.31	245	2.6	1.4	3.4	4	F4J8D3	F4J8D3	800	TPLATE	Protein TPLATE
270212574005127	268006992340088	266947135925293	272085304260254	embryo development ending in seed dormancy [GO:0009793];mRNA methylation [GO:0080009];mRNA processing [GO:0006397];RNA splicing [GO:0008380]	nuclear speck [GO:0016607];nucleoplasm [GO:0005654]		10	0	51.353	24	0.4	0.4	0.4	0.4	F4J8G7	F4J8G7	801	VIR	Protein virilizer homolog
267254638671875	269715843200684	266235218048096	270671234130859			hydrolase activity [GO:0016787]	8	0	71.901	64	33.2	23.1	28.1	37.2	F4J8J7	F4J8J7	802	At3g11930	Adenine nucleotide alpha hydrolases-like superfamily protein
268417015075684	NaN	271830978393555	271976051330566	embryo sac development [GO:0009553];mRNA processing [GO:0006397];rRNA processing [GO:0006364]	nucleolus [GO:0005730];plasma membrane [GO:0005886];small-subunit processome [GO:0032040]	RNA binding [GO:0003723]	21	0	52.757	63	1.4	0.4	1.4	1.4	F4J8K6	F4J8K6	803	RRP5	rRNA biogenesis protein RRP5
NaN	2760964012146	278647861480713	274997520446777	intracellular signal transduction [GO:0035556];protein phosphorylation [GO:0006468];regulation of gene expression [GO:0010468];regulation of mRNA processing [GO:0050684];response to oxidative stress [GO:0006979];spliceosomal complex assembly [GO:0000245]	cytoplasm [GO:0005737];nucleus [GO:0005634]	ATP binding [GO:0005524];MAP kinase activity [GO:0004707];protein kinase activity [GO:0004672]	4	0	4.6183	21	0	1.7	1.7	1.7	F4J982	F4J982	806	SRPK4	Ser/arg-rich protein kinase 4
296433048248291	295852737426758	296067142486572	29682861328125	glutamine biosynthetic process [GO:0006542];lateral root formation [GO:0010311];polyamine catabolic process [GO:0006598];response to abscisic acid [GO:0009737];response to bacterium [GO:0009617];root cap development [GO:0048829]	cytosol [GO:0005829]	gamma-tubulin binding [GO:0043015];hydrolase activity [GO:0016787];protein self-association [GO:0043621];transcription factor binding [GO:0008134]	53	0	323.31	434	25.9	30.3	31.3	22.5	F4J9A0	F4J9A0	807	NodGS	Nodulin/glutamine synthase-like protein
241442165374756	243005466461182	240019588470459	253869609832764		cytosol [GO:0005829]		51	0	257.23	195	7.1	6.1	6.1	9.2	F4J9K9	F4J9K9	809	At3g05900	Neurofilament protein-like protein
260973796844482	271341819763184	267418823242188	276374092102051			metal ion binding [GO:0046872];oxidoreductase activity [GO:0016491]	12	0	24.859	52	13.3	21.2	20.9	32	F4J9Y8	F4J9Y8	811	At3g19000	2-oxoglutarate (2OG) and Fe(II)-dependent oxygenase superfamily protein
24958589553833	243351097106934	248081836700439	251301803588867			aspartic-type endopeptidase activity [GO:0004190]	2	0	5.9005	4	4.6	4.6	2	6.6	F4JA44	F4JA44	812	At3g25700	Eukaryotic aspartyl protease family protein
261875972747803	260386505126953	264043006896973	25449348449707	carbohydrate metabolic process [GO:0005975]		hydrolase activity, hydrolyzing O-glycosyl compounds [GO:0004553]	16	0	13.528	32	22.7	19.1	20.6	19.4	F4JAB3	F4JAB3	814	At3g47010	Glycosyl hydrolase family protein
275841979980469	275874214172363	273149280548096	269974422454834				8	0	16.5	24	3	3.2	7	4.7	F4JAE0	F4JAE0	815	At3g53390	Transducin/WD40 repeat-like superfamily protein
242945289611816	241113986968994	239809379577637	242798004150391	peptidyl-proline hydroxylation to 4-hydroxy-L-proline [GO:0018401];root hair cell development [GO:0080147]	endoplasmic reticulum [GO:0005783];endoplasmic reticulum membrane [GO:0005789];endosome [GO:0005768];Golgi apparatus [GO:0005794];Golgi cis cisterna [GO:0000137];Golgi membrane [GO:0000139];integral component of membrane [GO:0016021];trans-Golgi network [GO:0005802]	iron ion binding [GO:0005506];L-ascorbic acid binding [GO:0031418];procollagen-proline 4-dioxygenase activity [GO:0004656]	6	0	11.465	11	9.4	5.7	5.7	7.4	F4JAU3	F4JAU3	816	P4H2	Prolyl 4-hydroxylase 2
250627059936523	25294038772583	255276393890381	252671375274658	signal transduction [GO:0007165]	cytosol [GO:0005829];nucleus [GO:0005634];protein phosphatase type 2A complex [GO:0000159]	protein phosphatase regulator activity [GO:0019888]	9	0	6.4985	19	4.7	3.2	4.7	4.7	F4JBC4	F4JBC4	818	At3g26020	Serine/threonine protein phosphatase 2A regulatory subunit
29754919052124	297803783416748	297668762207031	297885551452637		chloroplast [GO:0009507]		12	0	134.06	179	44.7	42.3	39.2	42.3	F4JBU0	F4JBU0	820	At3g60440	Phosphoglycerate mutase family protein
NaN	24650203704834	254728050231934	NaN			3-hydroxyisobutyryl-CoA hydrolase activity [GO:0003860];peptidase activity [GO:0008233]	6	0	13.29	18	4	13.1	2.6	4	F4JBV0	F4JBV0	821	At3g60510	ATP-dependent caseinolytic (Clp) protease/crotonase family protein
247683010101318	246360530853271	233811302185059	211546821594238	DNA repair [GO:0006281];proteasomal ubiquitin-independent protein catabolic process [GO:0010499]	cytosol [GO:0005829];nucleus [GO:0005634];proteasome complex [GO:0000502]	lysine-acetylated histone binding [GO:0070577];peptidase activator activity [GO:0016504];proteasome binding [GO:0070628]	59	0	199.89	263	1.2	1.1	2.9	1	F4JC97	F4JC97	822	PA200	Proteasome activator subunit 4
271381931304932	261596946716309	263857936859131	275990352630615			ATP binding [GO:0005524];hydrolase activity [GO:0016787]	29	0	67.805	86	1.5	2.6	2.6	1.5	F4JCC9	F4JCC9	823	At3g19740	P-loop containing nucleoside triphosphate hydrolases superfamily protein
23611780166626	NaN	251506977081299	NaN	endosomal transport [GO:0016197]			9	0	17.529	30	0.9	0	1.5	0	F4JCE9	F4JCE9	824	At3g19870	AP-5 complex subunit beta-like protein
277302665710449	277420768737793	279865798950195	278499546051025	arabinogalactan protein metabolic process [GO:0010405];carbohydrate metabolic process [GO:0005975]	cell wall [GO:0005618]	hydrolase activity, hydrolyzing O-glycosyl compounds [GO:0004553];polysaccharide binding [GO:0030247];raffinose alpha-galactosidase activity [GO:0052692]	12	0	20.702	98	12.2	9.6	9	10.5	F4JCI4	F4JCI4	825	At3g26380	Alpha-galactosidase
228648014068604	226770858764648	241033363342285	232989387512207				18	0	43.523	64	0.7	1.6	1.2	2.1	F4JCM5	F4JCM5	826	At3g33530	Transducin family protein / WD-40 repeat family protein
NaN	NaN	293336639404297	292843837738037	protein deubiquitination [GO:0016579]		thiol-dependent ubiquitinyl hydrolase activity [GO:0036459]	3	0.0033009	2.0412	3	0	0	0.6	0.6	F4JCR1	F4JCR1	827	At3g47890	Ubiquitin carboxyl-terminal hydrolase-related protein
252449951171875	24547513961792	240539093017578	NaN	miRNA mediated inhibition of translation [GO:0035278]	nucleus [GO:0005634];P-body [GO:0000932]	chromatin binding [GO:0003682]	7	0	11.504	17	1.8	1	2	0	F4JCS8	F4JCS8	829	SUO	Protein SUO
25015079498291	250410957336426	241064548492432	24457010269165	isopentenyl diphosphate biosynthetic process, mevalonate pathway [GO:0019287];sterol biosynthetic process [GO:0016126]	cytosol [GO:0005829];peroxisome [GO:0005777]	ATP binding [GO:0005524];diphosphomevalonate decarboxylase activity [GO:0004163]	23	0	38.264	52	24.6	30.1	21.2	19.3	F4JCU3	F4JCU3	830	MVD2	Diphosphomevalonate decarboxylase MVD2, peroxisomal
266419620513916	265462188720703	261172962188721	26445707321167		secretory vesicle [GO:0099503];vacuole [GO:0005773]		5	0	6.5578	26	11.4	12.5	7.7	15.5	F4JEG0	F4JEG0	835	At3g07460	Uncharacterized protein
291035957336426	29341552734375	294032440185547	291613006591797			hydrolase activity [GO:0016787]	16	0	196.04	158	52	56.3	55.9	64.5	F4JEJ3	F4JEJ3	836	At3g13800	Metallo-hydrolase/oxidoreductase superfamily protein
31988037109375	319851894378662	320861320495605	321423606872559			ATP binding [GO:0005524];helicase activity [GO:0004386];translation initiation factor activity [GO:0003743]	52	0	323.31	1226	61.2	61.4	60.9	65.1	F4JEL5	F4JEL5	837	EIF4A1	Eukaryotic translation initiation factor 4A1
25009880065918	255867481231689	257355442047119	257330112457275				10	0	39.892	51	3.8	8	10.8	7.3	F4JET6	F4JET6	838	JMJD5	2-oxoglutarate (2OG) and Fe(II)-dependent oxygenase superfamily protein
235588245391846	229360885620117	NaN	236120052337646	activation of GTPase activity [GO:0090630];intracellular protein transport [GO:0006886]	cytosol [GO:0005829]	GTPase activator activity [GO:0005096];Rab GTPase binding [GO:0017137]	18	0	48.433	52	2.8	2.9	1.1	7.3	F4JF82	F4JF82	840	At3g55020	Ypt/Rab-GAP domain of gyp1p superfamily protein
242915821075439	243118133544922	239702682495117	24611499786377			oxidoreductase activity [GO:0016491]	3	0.00094697	2.5849	2	9	5	9	9	F4JFB9	F4JFB9	842	SDRd	NAD(P)-binding Rossmann-fold superfamily protein
289626216888428	289369678497314	277446441650391	27815616607666	protein folding [GO:0006457]	cell wall [GO:0005618];chloroplast stroma [GO:0009570];cytosol [GO:0005829];mitochondrion [GO:0005739]	ATP binding [GO:0005524];unfolded protein binding [GO:0051082]	76	0	323.31	437	23.8	17.6	19.4	21.3	F4JFN3	F4JFN3	845	HSP90-6	Heat shock protein 90-6, mitochondrial
NaN	259090766906738	261999664306641	268058738708496	regulation of RNA metabolic process [GO:0051252]	nucleus [GO:0005634];ribonucleoprotein complex [GO:1990904]	mRNA binding [GO:0003729];RNA binding [GO:0003723]	7	0	20.697	17	0	1.6	1.6	1.6	F4JFN7	F4JFN7	846	At3g07810	RNA-binding (RRM/RBD/RNP motifs) family protein
257487316131592	259917449951172	253191719055176	260403232574463	xylan catabolic process [GO:0045493]		endo-1,4-beta-xylanase activity [GO:0031176]	5	0	3.2637	27	1.2	1.2	1.2	1.2	F4JG10	F4JG10	849	XYN3	Endo-1,4-beta-xylanase 3
246095848083496	248616905212402	25318000793457	253147201538086		integral component of membrane [GO:0016021]	ATP binding [GO:0005524];protein kinase activity [GO:0004672]	4	0	9.1341	16	7	8.4	1.6	4.4	F4JGE0	F4JGE0	851	CRK40	Cysteine-rich RLK (RECEPTOR-like protein kinase) 40
28304084777832	283045635223389	281426773071289	281553287506104	embryo development ending in seed dormancy [GO:0009793];fructose 6-phosphate metabolic process [GO:0006002];photosynthesis [GO:0015979];response to glucose [GO:0009749]	cytosol [GO:0005829]	6-phosphofructokinase activity [GO:0003872];ATP binding [GO:0005524];diphosphate-fructose-6-phosphate 1-phosphotransferase activity [GO:0047334];metal ion binding [GO:0046872];phosphofructokinase activity [GO:0008443]	30	0	46.116	92	22	26	24.3	32.2	F4JGR5	F4JGR5	853	PFP-BETA2	Pyrophosphate--fructose 6-phosphate 1-phosphotransferase subunit beta 2
263214797973633	26175142288208	262250118255615	261013927459717	acyl-CoA metabolic process [GO:0006637];fatty acid catabolic process [GO:0009062]		acyl-CoA hydrolase activity [GO:0047617]	6	0	11.131	53	10.2	15.5	6.6	10.2	F4JHC9	F4JHC9	855	At4g00520	Acyl-CoA thioesterase family protein
24781867980957	249191627502441	246883792877197	251057758331299				4	0	4.121	18	4.8	4.8	7.9	4.8	F4JHD7	F4JHD7	856	At4g00560	NAD(P)-binding Rossmann-fold superfamily protein
257780113220215	247440662384033	285138988494873	281365795135498	acceptance of pollen [GO:0060321];exocytosis [GO:0006887];Golgi to plasma membrane transport [GO:0006893];pollen germination [GO:0009846];pollen tube growth [GO:0009860];vesicle docking involved in exocytosis [GO:0006904]	cell wall [GO:0005618];cytoskeleton [GO:0005856];cytosol [GO:0005829];exocyst [GO:0000145];extracellular exosome [GO:0070062];membrane [GO:0016020];phragmoplast [GO:0009524];plasma membrane [GO:0005886];plasmodesma [GO:0009506]		27	0	79.407	94	2.2	1.8	2.2	2.2	F4JHH5	F4JHH5	857	SEC15B	Exocyst complex component SEC15B
312562561035156	312872505187988	311739082336426	312503929138184				28	0	323.31	509	55.4	55.4	55.4	55.4	F4JHJ0	F4JHJ0	859	At4g02450	HSP20-like chaperones superfamily protein
276255435943604	279384269714355	278150672912598	275692806243896	biosynthetic process [GO:0009058]	cytosol [GO:0005829]	catalytic activity [GO:0003824]	12	0	48.673	103	15.7	12.8	13.7	20.1	F4JHW1	F4JHW1	861	At4g02860	Phenazine biosynthesis PhzC/PhzF protein
303199081420898	303673439025879	304213161468506	304957180023193		chloroplast [GO:0009507]	catalytic activity [GO:0003824]	40	0	287.22	360	42.3	32.9	41.7	29.5	F4JI63	F4JI63	864	At4g03200	Catalytics
261353378295898	25971715927124	260065441131592	262738208770752	DNA catabolic process [GO:0006308];RNA phosphodiester bond hydrolysis, endonucleolytic [GO:0090502]		endonuclease activity [GO:0004519];endoribonuclease activity [GO:0004521];metal ion binding [GO:0046872];nucleic acid binding [GO:0003676];single-stranded DNA endodeoxyribonuclease activity [GO:0000014]	5	0	4.6509	19	9.7	7	7	7	F4JJL0	F4JJL0	869	ENDO4	Endonuclease 4
253598785400391	256193580627441	257975368499756	258979530334473	DNA catabolic process [GO:0006308];RNA phosphodiester bond hydrolysis, endonucleolytic [GO:0090502]		endonuclease activity [GO:0004519];endoribonuclease activity [GO:0004521];metal ion binding [GO:0046872];nucleic acid binding [GO:0003676];single-stranded DNA endodeoxyribonuclease activity [GO:0000014];T/G mismatch-specific endonuclease activity [GO:0043765]	12	0	52.349	49	6.4	8.8	8.8	8.8	F4JJL3	F4JJL3	870	ENDO5	Endonuclease 5
236116676330566	236832466125488	237987728118896	235878353118896				4	0	7.1951	15	30.6	25.5	19.4	30.6	F4JJL6	F4JJL6	871	At4g21620	Glycine-rich protein
269630069732666	270579624176025	271717872619629	27210018157959	intracellular protein transport [GO:0006886]			17	0	133.83	94	19.6	20.7	17.1	25.5	F4JJR0	F4JJR0	873	VPS26B	Vacuolar protein sorting 26B
297351989746094	297621154785156	299729537963867	298511772155762	tRNA aminoacylation for protein translation [GO:0006418]	chloroplast [GO:0009507];cytosol [GO:0005829];mitochondrion [GO:0005739]	aspartate-tRNA ligase activity [GO:0004815];ATP binding [GO:0005524];DNA binding [GO:0003677];metal ion binding [GO:0046872]	28	0	84.518	248	27.7	24.5	38.6	38.6	F4JJT9	F4JJT9	874	At4g33760	Aspartate--tRNA ligase, chloroplastic/mitochondrial
28745735168457	288986511230469	284136905670166	276382369995117		chloroplast [GO:0009507];chloroplast stroma [GO:0009570]		11	0	24.381	51	24.9	29.2	25.4	27.2	F4JJY7	F4JJY7	875	At4g34090	Cyclin delta-3
273692798614502	272409076690674	264130783081055	268965454101563		cytosol [GO:0005829]	2,3-bisphosphoglycerate-independent phosphoglycerate mutase activity [GO:0046537];metal ion binding [GO:0046872]	18	0	102.27	144	16.1	11.6	9.8	17.5	F4JK17	F4JK17	876	At4g09520	Cofactor-independent phosphoglycerate mutase
316570625305176	309423065185547	309646472930908	315332927703857	cell cycle [GO:0007049];multicellular organism development [GO:0007275];response to abscisic acid [GO:0009737]	cytoplasm [GO:0005737];plasma membrane [GO:0005886]		85	0	323.31	559	27.4	32.8	31.1	33.5	F4JKH6	F4JKH6	879	TSS	Protein TSS
305398235321045	305590114593506	307906379699707	305654716491699		chloroplast [GO:0009507];chloroplast stroma [GO:0009570];cytosol [GO:0005829]		21	0	209.43	234	54.7	52.2	50.2	50.2	F4JKZ9	F4JKZ9	880	At4g16060	Uncharacterized protein
298286266326904	297037181854248	298653926849365	297453022003174	NLS-bearing protein import into nucleus [GO:0006607]	cytosol [GO:0005829];host cell nucleus [GO:0042025];nuclear envelope [GO:0005635];nucleolus [GO:0005730];nucleus [GO:0005634];plasmodesma [GO:0009506]	nuclear import signal receptor activity [GO:0061608];nuclear localization sequence binding [GO:0008139]	41	0	323.31	428	48.6	55.5	49.3	48.4	F4JL11	F4JL11	881	IMPA2	Importin subunit alpha-2
NaN	242639179229736	2509450340271	256046161651611	chromatin organization [GO:0006325];flower development [GO:0009908];negative regulation of histone acetylation [GO:0035067];negative regulation of long-day photoperiodism, flowering [GO:0048579];post-embryonic development [GO:0009791];regulation of photoperiodism, flowering [GO:2000028];regulation of transcription, DNA-templated [GO:0006355];seed germination [GO:0009845]	nucleus [GO:0005634]	chromatin binding [GO:0003682];metal ion binding [GO:0046872];methylated histone binding [GO:0035064];transcription regulatory region sequence-specific DNA binding [GO:0000976]	3	0	5.59	17	0	9	14.1	14.1	F4JL28	F4JL28	882	EBS	Chromatin remodeling protein EBS
247575073242188	247354164123535	250844821929932	245861759185791				6	0	5.7697	42	9.6	7.8	3	5.5	F4JL78	F4JL78	883	At4g28300	Formin-like protein (DUF1421)
314960041046143	314901332855225	314222183227539	315504589080811	isoleucyl-tRNA aminoacylation [GO:0006428];response to cadmium ion [GO:0046686]	cytosol [GO:0005829]	aminoacyl-tRNA editing activity [GO:0002161];ATP binding [GO:0005524];isoleucine-tRNA ligase activity [GO:0004822];tRNA binding [GO:0000049]	109	0	323.31	1054	39.5	45	44.5	44	F4JLM5	F4JLM5	885	At4g10320	Isoleucine--tRNA ligase, cytoplasmic
319426555633545	317902870178223	319250736236572	318439331054688	cell redox homeostasis [GO:0045454];oxidation-reduction process [GO:0055114];response to arsenic-containing substance [GO:0046685]	chloroplast [GO:0009507];chloroplast envelope [GO:0009941];chloroplast stroma [GO:0009570];cytosol [GO:0005829]	dihydrolipoyl dehydrogenase activity [GO:0004148];flavin adenine dinucleotide binding [GO:0050660]	50	0	323.31	1028	58.2	69.8	68.3	58.4	F4JLP5	F4JLP5	886	LPD2	Dihydrolipoyl dehydrogenase 2, chloroplastic
25685733795166	257380466461182	28091136932373	280861835479736		cytosol [GO:0005829];endoplasmic reticulum [GO:0005783];integral component of membrane [GO:0016021];plasma membrane [GO:0005886]		3	0	7.2705	13	2.6	2.6	1.3	1.3	F4JLQ2	F4JLQ2	887	At4g16180	Transmembrane protein
272323322296143	270926494598389	270852718353271	26957483291626		peroxisome [GO:0005777]	dioxygenase activity [GO:0051213];metal ion binding [GO:0046872]	7	0	46.529	58	15.9	17.3	20.6	20.6	F4JLS2	F4JLS2	888	At4g16330	2-oxoglutarate (2OG) and Fe(II)-dependent oxygenase superfamily protein
NaN	247258796691895	247380981445313	24526237487793		chloroplast [GO:0009507];cytosol [GO:0005829]	kinase activity [GO:0016301];phosphotransferase activity, alcohol group as acceptor [GO:0016773]	27	0	6.8381	15	52.7	44.1	49.8	43	F4JM15	F4JM15	889	At4g28706	PfkB-like carbohydrate kinase family protein
277004814147949	277354412078857	275822620391846	277812557220459			dioxygenase activity [GO:0051213]	7	0	26.402	79	17.8	17.8	20.9	20.9	F4JML2	F4JML2	892	At4g16770	2-oxoglutarate (2OG) and Fe(II)-dependent oxygenase superfamily protein
NaN	247329349517822	248427810668945	NaN	branched-chain amino acid catabolic process [GO:0009083];fatty acid beta-oxidation [GO:0006635]	cytosol [GO:0005829];mitochondrion [GO:0005739]	enoyl-CoA hydratase activity [GO:0004300];methylglutaconyl-CoA hydratase activity [GO:0004490];peptidase activity [GO:0008233]	4	0.00019231	2.8441	5	3.3	8.6	8.6	0	F4JML5	F4JML5	893	At4g16800	Probable enoyl-CoA hydratase 2, mitochondrial
309625797271729	309917907714844	309137783050537	309894256591797	defense response to bacterium, incompatible interaction [GO:0009816];post-embryonic development [GO:0009791];protein folding [GO:0006457];protein targeting to chloroplast [GO:0045036];response to cadmium ion [GO:0046686];vegetative to reproductive phase transition of meristem [GO:0010228]	chloroplast [GO:0009507];cytoplasm [GO:0005737];integral component of chloroplast outer membrane [GO:0031359];nucleus [GO:0005634];plasma membrane [GO:0005886]		27	0	323.31	394	63.4	63.4	71.7	75.1	F4JN13	F4JN13	895	AKR2	Ankyrin repeat-containing protein 2
290131053924561	291109046936035	290908336639404	291762409210205		cytosol [GO:0005829]	endoribonuclease activity [GO:0004521]	20	0	323.31	257	37.3	34.7	44.9	41.4	F4JNE1	F4JNE1	898	At4g17100	Poly(U)-specific endoribonuclease-B protein
240554828643799	240384197235107	243291664123535	245251617431641		integral component of membrane [GO:0016021]	ATP binding [GO:0005524];protein kinase activity [GO:0004672]	3	0	6.1666	14	1.7	1.7	1.7	1.7	F4JNH2	F4JNH2	900	CRK18	Cysteine-rich RLK (RECEPTOR-like protein kinase) 18
253295078277588	254727420806885	NaN	NaN				5	0.0098418	1.4718	8	3.9	3.9	0	0	F4JP95	F4JP95	903	At4g17650	Polyketide cyclase / dehydrase and lipid transport protein
255075454711914	257860870361328	256076946258545	256421279907227		integral component of membrane [GO:0016021]		8	0	61.781	39	1.8	8.4	8.9	8.9	F4JPQ4	F4JPQ4	906	AP22.38	G-protein coupled receptor
216071128845215	219381904602051	216242637634277	NaN	RNA processing [GO:0006396]		RNA binding [GO:0003723]	24	0	74.176	99	1.3	1.3	2.2	0	F4JQ75	F4JQ75	908	EMB140	EMBRYO DEFECTIVE 140
310652885437012	311718235015869	310970401763916	312744216918945	carbohydrate metabolic process [GO:0005975]	chloroplast [GO:0009507];cytosol [GO:0005829];plasma membrane [GO:0005886]	kinase activity [GO:0016301];phosphotransferase activity, alcohol group as acceptor [GO:0016773]	37	0	323.31	487	56.8	59.1	60.6	53	F4JQ90	F4JQ90	909	At4g30310	FGGY family of carbohydrate kinase
279235439300537	284256248474121	282102508544922	280637340545654	photosynthesis [GO:0015979]	chloroplast [GO:0009507];plasma membrane [GO:0005886]		24	0	105.39	151	28.4	24.9	21.5	26.9	F4JQE2	F4JQE2	910	PDE327	FAD/NAD(P)-binding oxidoreductase family protein
290806560516357	294572067260742	293057594299316	293919639587402	lipid metabolic process [GO:0006629]	plasma membrane [GO:0005886]	phosphoric diester hydrolase activity [GO:0008081]	13	0	113.28	158	22.1	23.8	23.8	23.8	F4JQJ7	F4JQJ7	911	At4g36945	PLC-like phosphodiesterases superfamily protein
263007030487061	256305923461914	255225601196289	253923435211182	activation of GTPase activity [GO:0090630];negative regulation of Rho protein signal transduction [GO:0035024];pollen germination [GO:0009846];pollen tube adhesion [GO:0009865];pollen tube development [GO:0048868];pollen tube growth [GO:0009860];positive regulation of GTPase activity [GO:0043547];regulation of growth [GO:0040008];signal transduction [GO:0007165]	apical part of cell [GO:0045177];apical plasma membrane [GO:0016324];cell cortex [GO:0005938];exocytic vesicle [GO:0070382];pollen tube [GO:0090406]	GTPase activator activity [GO:0005096];Rho GTPase binding [GO:0017048]	2	0.0095154	1.4989	8	1.7	1.7	1.7	1.7	F4JQZ3	F4JQZ3	913	REN1	Rho GTPase-activating protein REN1
330586776733398	329903907775879	328365211486816	331366729736328	mitochondrial respiratory chain complex I assembly [GO:0032981];NADH dehydrogenase complex assembly [GO:0010257]	chloroplast [GO:0009507];chloroplast stroma [GO:0009570];cytosol [GO:0005829];vacuole [GO:0005773]	unfolded protein binding [GO:0051082]	51	0	323.31	662	53	56.3	55.7	53	F4JRN8	F4JRN8	915	At4g18810	NAD(P)-binding Rossmann-fold superfamily protein
NaN	259792156219482	NaN	258457984924316	Golgi organization [GO:0007030];intra-Golgi vesicle-mediated transport [GO:0006891];protein transport [GO:0015031];regulation of exocyst localization [GO:0060178]	cytoplasmic vesicle [GO:0031410];Golgi membrane [GO:0000139];Golgi transport complex [GO:0017119];vacuole [GO:0005773]	protein homodimerization activity [GO:0042803]	24	0	182.34	88	0	1.1	0	1.1	F4JRR1	F4JRR1	916	COG2	Conserved oligomeric Golgi complex subunit 2
261372356414795	261581153869629	256197490692139	258627319335938		integral component of membrane [GO:0016021]	ATP binding [GO:0005524];ATPase activity [GO:0016887];ATPase-coupled transmembrane transporter activity [GO:0042626]	6	0	7.5798	25	4.6	4.6	6.2	4.6	F4JSM3	F4JSM3	920	ABCB28	Non-intrinsic ABC protein 8
276016578674316	NaN	264146747589111	272771949768066	protein transport [GO:0015031];regulation of ARF protein signal transduction [GO:0032012]	chloroplast [GO:0009507];cytosol [GO:0005829];membrane [GO:0016020];trans-Golgi network [GO:0005802]	ARF guanyl-nucleotide exchange factor activity [GO:0005086]	25	0	37.132	57	0.5	0.5	1.6	0.5	F4JSZ5	F4JSZ5	921	BIG1	Brefeldin A-inhibited guanine nucleotide-exchange protein 1
NaN	240826148986816	NaN	243579006195068			dioxygenase activity [GO:0051213]	1	0.0047127	1.8636	10	0	2.5	0	2.5	F4JT13	F4JT13	922	At4g13400	2-oxoglutarate (2OG) and Fe(II)-dependent oxygenase superfamily protein
288628673553467	289400539398193	288015022277832	286132984161377	mRNA cis splicing, via spliceosome [GO:0045292];regulation of alternative mRNA splicing, via spliceosome [GO:0000381]	nuclear speck [GO:0016607];nucleolus [GO:0005730];nucleus [GO:0005634]	RNA binding [GO:0003723]	4	0	29.369	22	1.6	1.6	1.6	1.6	F4JT92	F4JT92	924	At4g19610	Nucleotide/nucleic acid binding protein
278440380096436	279915084838867	280083847045898	279374732971191	dephosphorylation [GO:0016311];glycerol biosynthetic process [GO:0006114];riboflavin biosynthetic process [GO:0009231]	mitochondrion [GO:0005739]	glycerol-1-phosphatase activity [GO:0000121];glycerol-3-phosphatase activity [GO:0043136];magnesium ion binding [GO:0000287];phosphatase activity [GO:0016791]	23	0	172.78	128	23.2	21.1	22.8	21.5	F4JTE7	F4JTE7	926	GPP1	(DL)-glycerol-3-phosphatase 1, mitochondrial
251437873840332	26606819152832	255645923614502	255755405426025	mitotic sister chromatid cohesion [GO:0007064]			15	0	39.815	56	3.2	3.2	3	3	F4JTF2	F4JTF2	927	At4g31880	Transcriptional regulator
24450984954834	22601095199585	231718673706055	22148551940918		vacuole [GO:0005773]		26	0	134.19	121	4.3	3.5	4.6	2.7	F4JTI1	F4JTI1	928	PHOX4	Protein PHOX4
215672760009766	22088451385498	223999423980713	224724388122559	protein transport [GO:0015031]	cytoplasm [GO:0005737];cytosol [GO:0005829];endosome membrane [GO:0010008]	phosphatidylinositol binding [GO:0035091]	10	0	21.103	24	3.6	3.6	4.3	4.3	F4JTJ2	F4JTJ2	929	EREL1	PX domain-containing protein EREL1
240293483734131	239748249053955	242201480865479	243680629730225	synaptonemal complex assembly [GO:0007130]	chromosome [GO:0005694];nucleus [GO:0005634]		5	0	3.8705	10	0.9	2.6	0.9	0.9	F4JTJ9	F4JTJ9	930	ASY2	Meiosis-specific protein ASY2
326439437866211	325211715698242	324650917053223	32542179107666	cellular amino acid metabolic process [GO:0006520];response to zinc ion [GO:0010043]	endoplasmic reticulum [GO:0005783];Golgi apparatus [GO:0005794];plasma membrane [GO:0005886];secretory vesicle [GO:0099503];vacuole [GO:0005773]	aminoacylase activity [GO:0004046];metallopeptidase activity [GO:0008237]	43	0	323.31	864	81.5	76.9	79.7	70	F4JTK8	F4JTK8	931	AQI	Peptidase M20/M25/M40 family protein
249351711273193	NaN	242515468597412	NaN				5	0	3.6033	25	6.9	0	2.9	2.9	F4JTM0	F4JTM0	932	At4g38260	Transport/golgi organization-like protein (DUF833)
NaN	239489555358887	233761024475098	223182144165039	cellular response to hypoxia [GO:0071456];chloroplast organization [GO:0009658]	cytosol [GO:0005829]	ATP binding [GO:0005524];protein kinase activity [GO:0004672];protein serine/threonine kinase activity [GO:0004674];protein serine/threonine/tyrosine kinase activity [GO:0004712]	22	0	58.915	73	0	2.3	4.2	1.9	F4JTP5	F4JTP5	934	STY46	Serine/threonine-protein kinase STY46
292676296234131	293247661590576	295010070800781	293549995422363	COPII-coated vesicle cargo loading [GO:0090110];intracellular protein transport [GO:0006886]	COPII vesicle coat [GO:0030127];cytosol [GO:0005829];endoplasmic reticulum exit site [GO:0070971];endoplasmic reticulum membrane [GO:0005789];Golgi membrane [GO:0000139]	GTPase activator activity [GO:0005096];zinc ion binding [GO:0008270]	43	0	323.31	358	23.5	28.1	24.8	24.1	F4JUM1	F4JUM1	938	At4g14160	Protein transport protein SEC23
234429092407227	239558887481689	233578338623047	238550033569336		cytoplasm [GO:0005737]	translation elongation factor activity [GO:0003746]	3	0.0020333	2.17	12	3.4	3.4	3.4	3.4	F4JUX3	F4JUX3	940	At4g26310	Elongation factor P (EF-P) family protein
328760414123535	32897533416748	327609939575195	328738098144531	proteolysis [GO:0006508]	chloroplast [GO:0009507];cytoplasm [GO:0005737];cytosol [GO:0005829];cytosolic ribosome [GO:0022626];vacuolar membrane [GO:0005774];vacuole [GO:0005773]	aminopeptidase activity [GO:0004177];serine-type endopeptidase activity [GO:0004252];tripeptidyl-peptidase activity [GO:0008240]	158	0	323.31	1794	61.4	54	51.6	56.3	F4JVN6	F4JVN6	942	TPP2	Tripeptidyl-peptidase 2
224536247253418	NaN	NaN	267971153259277	L-lysine catabolic process [GO:0019477];response to karrikin [GO:0080167]	cytoplasm [GO:0005737];cytosol [GO:0005829]	saccharopine dehydrogenase (NADP+, L-lysine-forming) activity [GO:0047130];saccharopine dehydrogenase activity [GO:0004753]	62	0	253.6	288	2.8	0	0	2.3	F4JVY8	F4JVY8	943	LKR	Lysine-ketoglutarate reductase/saccharopine dehydrogenase bifunctional enzyme
273509387969971	273477325439453	273557357788086	273244018554688	cinnamic acid biosynthetic process [GO:0009800];L-phenylalanine catabolic process [GO:0006559]	cytoplasm [GO:0005737]	phenylalanine ammonia-lyase activity [GO:0045548]	22	0	42.237	67	18.9	19.1	19.8	15.5	F4JW69	F4JW69	944	PAL3	Phenylalanine ammonia-lyase
214036407470703	216371040344238	NaN	215654640197754		CCR4-NOT complex [GO:0030014]		20	0	127.61	99	3.9	3.9	3.6	3.9	F4JWN4	F4JWN4	945	At5g18420	CCR4-NOT transcription complex subunit
245893802642822	248429718017578	215740852355957	NaN	intracellular protein transport [GO:0006886];vesicle-mediated transport [GO:0016192]	AP-4 adaptor complex [GO:0030124];clathrin adaptor complex [GO:0030131]	clathrin binding [GO:0030276]	30	0	164.79	149	1.3	2.1	2.6	0.8	F4JXV9	F4JXV9	953	At5g11490	Beta-adaptin-like protein
23608512878418	234445533752441	NaN	NaN		integral component of membrane [GO:0016021]		4	0	3.2632	9	1.1	1.1	0	0	F4JXY5	F4JXY5	955	At5g11700	Ephrin type-B receptor
277569732666016	273545589447021	279361267089844	278644332885742	embryo development ending in seed dormancy [GO:0009793];folic acid-containing compound biosynthetic process [GO:0009396];one-carbon metabolic process [GO:0006730];tetrahydrofolate biosynthetic process [GO:0046654]	cytoplasm [GO:0005737];cytosol [GO:0005829];mitochondrial matrix [GO:0005759];mitochondrion [GO:0005739]	ATP binding [GO:0005524];dihydrofolate synthase activity [GO:0008841];metal ion binding [GO:0046872];tetrahydrofolylpolyglutamate synthase activity [GO:0004326]	10	0	34.945	59	16.4	12.3	16	13	F4JYE9	F4JYE9	959	DHFS	Dihydrofolate synthetase
243687305450439	225007915496826	NaN	NaN	mitotic sister chromatid cohesion [GO:0007064]			54	0	181.32	229	1.1	1.6	0	0	F4JYL8	F4JYL8	960	At5g47690	Binding protein
246354999542236	243201713562012	238614540100098	244218826293945	N-glycan processing [GO:0006491];protein deglycosylation [GO:0006517]	cytoplasm [GO:0005737];cytosol [GO:0005829];vacuole [GO:0005773]	mannosyl-glycoprotein endo-beta-N-acetylglucosaminidase activity [GO:0033925]	12	0	15.384	46	4.4	1.8	1.8	1.8	F4JZC2	F4JZC2	963	ENGASE1	Cytosolic endo-beta-N-acetylglucosaminidase 1
255952262878418	25169017791748	252017993927002	237169094085693	mRNA splicing, via spliceosome [GO:0000398];spliceosomal complex assembly [GO:0000245]	catalytic step 2 spliceosome [GO:0071013];plastid [GO:0009536];post-mRNA release spliceosomal complex [GO:0071014];Prp19 complex [GO:0000974];U2-type catalytic step 2 spliceosome [GO:0071007]		7	0	19.622	20	1.3	1.3	1.3	3.4	F4JZX8	F4JZX8	965	At5g41770	Crooked neck protein, putative / cell cycle protein
254812068939209	232912311553955	249104042053223	233315601348877	abscisic acid-activated signaling pathway [GO:0009738];cellular response to abscisic acid stimulus [GO:0071215];positive regulation of abscisic acid-activated signaling pathway [GO:0009789];regulation of protein import into nucleus [GO:0042306];response to abscisic acid [GO:0009737];response to osmotic stress [GO:0006970]	cytoskeleton [GO:0005856];cytosol [GO:0005829];plasma membrane [GO:0005886];plastid [GO:0009536];vacuolar membrane [GO:0005774];vacuole [GO:0005773]	actin binding [GO:0003779]	65	0	316.69	214	2.4	2.2	5.7	2.4	F4JZY1	F4JZY1	966	CIP1	COP1-interactive protein 1
312889003753662	313961658477783	314934768676758	314344997406006		cytoplasm [GO:0005737];cytosol [GO:0005829];mitochondrion [GO:0005739];nucleus [GO:0005634];plastid [GO:0009536]	hydrolase activity [GO:0016787]	36	0	283.32	581	66.5	67	73.5	71.8	F4K000	F4K000	968	MJC20.7	Metal-dependent protein hydrolase
28547492980957	286559467315674	28942684173584	289887752532959	carbohydrate metabolic process [GO:0005975]		hydrolase activity, hydrolyzing O-glycosyl compounds [GO:0004553]	10	0	72.001	54	17.7	17.3	13.9	18.7	F4K020	F4K020	969	BG_PPAP	Beta-1,3-glucanase
284005584716797	280137176513672	283845520019531	28254487991333	tryptophan metabolic process [GO:0006568]		indole-3-glycerol-phosphate synthase activity [GO:0004425]	14	0	66.626	124	31.9	30.2	31.9	32.4	F4K083	F4K083	970	MIF21.11	Aldolase-type TIM barrel family protein
271948852539063	275451736450195	278193988800049	277320156097412	cell plate assembly [GO:0000919];cytokinesis by cell plate formation [GO:0000911];early endosome to Golgi transport [GO:0034498];intra-Golgi vesicle-mediated transport [GO:0006891]	cytosol [GO:0005829];early endosome [GO:0005769];trans-Golgi network [GO:0005802];TRAPPII protein complex [GO:1990071]		39	0	176.52	288	9.4	5.4	8.3	8.7	F4K0C4	F4K0C4	971	TRS130	Trafficking protein particle complex II-specific subunit 130 homolog
256234378814697	257529735565186	25442720413208	259979591369629	regulation of translational fidelity [GO:0006450]	cytoplasm [GO:0005737]	double-stranded RNA binding [GO:0003725];nucleotidyltransferase activity [GO:0016779];tRNA binding [GO:0000049]	3	0	7.388	9	12.5	10.1	12.5	12.5	F4K0E6	F4K0E6	972	MUP24.1	DHBP synthase RibB-like alpha/beta domain-containing protein
307700634002686	30803165435791	306900424957275	307285003662109	isopentenyl diphosphate biosynthetic process, methylerythritol 4-phosphate pathway [GO:0019288];response to bacterium [GO:0009617];systemic acquired resistance, salicylic acid mediated signaling pathway [GO:0009862];terpenoid biosynthetic process [GO:0016114]	chloroplast [GO:0009507];chloroplast envelope [GO:0009941];chloroplast stroma [GO:0009570];plastid [GO:0009536]	4 iron, 4 sulfur cluster binding [GO:0051539];4-hydroxy-3-methylbut-2-en-1-yl diphosphate synthase activity [GO:0046429];iron ion binding [GO:0005506]	48	0	323.31	525	51.6	57.2	48.7	47.1	F4K0E8	F4K0E8	973	ISPG	4-hydroxy-3-methylbut-2-en-1-yl diphosphate synthase (ferredoxin), chloroplastic
287598628997803	284646263122559	283788166046143	279232044219971		chloroplast [GO:0009507]	nucleoside-triphosphate diphosphatase activity [GO:0047429]	10	0	49.93	78	40.1	27.1	36.7	36.7	F4K0M7	F4K0M7	974	At5g66550	Maf-like protein
252482204437256	254035358428955	25595682144165	25054573059082	methylation [GO:0032259];vesicle-mediated transport [GO:0016192]	integral component of membrane [GO:0016021]	methyltransferase activity [GO:0008168];nucleic acid binding [GO:0003676]	11	0	45.82	64	4.1	6.5	4.5	1.6	F4K0R0	F4K0R0	975	MOP10.11	Transducin family protein / WD-40 repeat family protein
264925289154053	269681816101074	265800342559814	257147903442383		chloroplast [GO:0009507];chloroplast envelope [GO:0009941];chloroplast stroma [GO:0009570]	hydrolase activity [GO:0016787]	11	0	19.485	61	11	9.7	8.1	7.5	F4K1G7	F4K1G7	979	MEE13.8	P-loop containing nucleoside triphosphate hydrolases superfamily protein
290348567962646	291561737060547	291293506622314	291233196258545			oxidoreductase activity [GO:0016491]	22	0	85.722	223	35.3	42.4	37.2	42.4	F4K1P8	F4K1P8	980	MJE7.7	FAD-dependent oxidoreductase family protein
265489253997803	264983997344971	265310211181641	267972393035889	histone modification [GO:0016570];transcription elongation from RNA polymerase II promoter [GO:0006368]	Cdc73/Paf1 complex [GO:0016593]		5	0	23.954	13	3.7	3.7	3.7	3.7	F4K204	F4K204	982	VIP4	Leo1-like family protein
245275497436523	272633819580078	27306173324585	2745041847229				9	0	14.649	32	1.5	2.5	2.5	2.5	F4K250	F4K250	983	MUD21.5	Ran-binding protein in the microtubule-organising centre protein
NaN	244871387481689	238097057342529	239571285247803	autophagosome assembly [GO:0000045];protein transport [GO:0015031]	autophagosome [GO:0005776];cytoplasmic vesicle [GO:0031410];phagophore assembly site [GO:0000407]		3	0.0032937	2.0212	3	0	4.2	4.2	4.2	F4K265	F4K265	984	ATG101	Autophagy-related protein 101
298410720825195	299618225097656	299692535400391	298192920684814	folic acid-containing compound biosynthetic process [GO:0009396];lignin biosynthetic process [GO:0009809];one-carbon metabolic process [GO:0006730];quiescent center organization [GO:1904961];root development [GO:0048364];root hair elongation [GO:0048767];root meristem growth [GO:0010449];tetrahydrofolylpolyglutamate biosynthetic process [GO:0046901]	chloroplast [GO:0009507];cytoplasm [GO:0005737];cytosol [GO:0005829];mitochondrion [GO:0005739]	ATP binding [GO:0005524];metal ion binding [GO:0046872];tetrahydrofolylpolyglutamate synthase activity [GO:0004326]	34	0	305.1	383	40.6	40.1	36.6	40.8	F4K2A1;REV__Q9MB58	F4K2A1	985	FPGS1	Folylpolyglutamate synthase
323129501342773	322153511047363	322206077575684	321783676147461		chloroplast [GO:0009507];cytosol [GO:0005829];plastid [GO:0009536]	serine-type peptidase activity [GO:0008236]	62	0	323.31	860	56.4	57.3	57.7	55.1	F4K2Y3	F4K2Y3	987	MAB16.20	Alpha/beta-Hydrolases superfamily protein
278616561889648	28103645324707	279924259185791	281488475799561			nucleoside-triphosphate diphosphatase activity [GO:0047429]	16	0	32.916	97	43.2	59.7	52.9	51.5	F4K331	F4K331	988	MJB21.15	Maf-like protein
302399082183838	303131122589111	301410217285156	302653942108154		chloroplast [GO:0009507];chloroplast stroma [GO:0009570]	5'-nucleotidase activity [GO:0008253];metal ion binding [GO:0046872]	35	0	240.76	320	36.1	37.4	28.8	32.1	F4K3A9	F4K3A9	989	At5g48960	HAD-superfamily hydrolase, subfamily IG, 5'-nucleotidase
247000179290771	NaN	26848165512085	NaN			ATP binding [GO:0005524];ligase activity [GO:0016874];protein kinase activity [GO:0004672]	36	0	84.788	119	0.6	0	1	0	F4K3Z6	F4K3Z6	991	KEG	Protein kinasesubiquitin-protein ligase
273427410125732	273110332489014	270876007080078	273395156860352	protein stabilization [GO:0050821];response to cold [GO:0009409];rRNA processing [GO:0006364]	chloroplast [GO:0009507];ribonucleoprotein complex [GO:1990904]	GTP binding [GO:0005525];GTPase activity [GO:0003924];translation elongation factor activity [GO:0003746]	19	0	69.388	57	25.3	18.2	7	21.3	F4K410	F4K410	992	SVR3	Putative elongation factor TypA-like SVR3, chloroplastic
24531005859375	246758365631104	247834167480469	245862331390381				2	0	4.056	46	10.3	10.3	10.3	10.3	F4K464	F4K464	994	At5g20190	Tetratricopeptide repeat (TPR)-like superfamily protein
227159671783447	NaN	NaN	235045795440674	cellular response to hypoxia [GO:0071456];response to cold [GO:0009409];response to karrikin [GO:0080167];response to oxidative stress [GO:0006979]	chloroplast [GO:0009507];cytosol [GO:0005829];plasmodesma [GO:0009506]	catalytic activity [GO:0003824];mRNA binding [GO:0003729]	55	0	282.51	314	3.7	0	0	0.8	F4K470	F4K470	996	DIN10	Raffinose synthase family protein
268702068328857	27390344619751	274634170532227	286782169342041	DNA repair [GO:0006281]	plasmodesma [GO:0009506]	DNA polymerase binding [GO:0070182]	4	0	3.6628	17	1.2	1.6	1.2	2.6	F4K4R1	F4K4R1	1001	At5g49110	Fanconi anemia group I-like protein
245880641937256	24593318939209	245969619750977	243288230895996	regulation of double-strand break repair [GO:2000779]	mitochondrion [GO:0005739];nucleus [GO:0005634];plastid [GO:0009536]	histone binding [GO:0042393]	14	0	27.127	56	3	7.6	1.9	3.2	F4K4Y5	F4K4Y5	1002	MDF20.10	DEK domain-containing chromatin associated protein
308512516021729	307589912414551	308794975280762	308290367126465	protein catabolic process [GO:0030163];proteolysis [GO:0006508]	cell wall [GO:0005618]	aspartic-type endopeptidase activity [GO:0004190]	27	0	78.707	304	40.4	38.2	35.4	35.4	F4K5B9	F4K5B9	1004	MOJ9.20	Eukaryotic aspartyl protease family protein
284551296234131	289521598815918	296767044067383	27169017791748	actin filament organization [GO:0007015];actin filament-based movement [GO:0030048];cell division [GO:0051301];fruit development [GO:0010154];Golgi localization [GO:0051645];gynoecium development [GO:0048467];leaf pavement cell development [GO:0090436];mitochondrion localization [GO:0051646];peroxisome localization [GO:0060151];post-embryonic development [GO:0009791];root hair cell tip growth [GO…	actin cytoskeleton [GO:0015629];cytoplasm [GO:0005737];myosin complex [GO:0016459];plasmodesma [GO:0009506];root hair tip [GO:0035619];transport vesicle [GO:0030133];vesicle [GO:0031982]	actin filament binding [GO:0051015];actin-dependent ATPase activity [GO:0030898];ATP binding [GO:0005524];calmodulin binding [GO:0005516];microfilament motor activity [GO:0000146];motor activity [GO:0003774]	65	0	205.6	223	0.7	0.7	1.4	2.4	F4K5J1	F4K5J1	1005	XI-K	Myosin-17
256170330047607	257263221740723	259194355010986	252380123138428	cysteine biosynthetic process from serine [GO:0006535];cysteine homeostasis [GO:0080145];response to oxidative stress [GO:0006979];stress response to cadmium ion [GO:1990170]	cytoplasm [GO:0005737]	cystathionine gamma-lyase activity [GO:0004123];cysteine synthase activity [GO:0004124];L-cysteine desulfhydrase activity [GO:0080146];L-cystine L-cysteine-lyase (deaminating) [GO:0044540];pyridoxal phosphate binding [GO:0030170]	9	0.0022144	2.14	8	24.8	20.1	22.3	22.3	F4K5T2	F4K5T2	1008	DES1	Bifunctional cystathionine gamma-lyase/cysteine synthase
250246639251709	240446853637695	246450996398926	240604400634766				2	0.0064251	1.6469	12	0.9	0.9	0.9	0.9	F4K5Y6	F4K5Y6	1010	MNL12.14	COP1-interacting protein-like protein
253167572021484	241586933135986	244775371551514	237668857574463		mitochondrion [GO:0005739];plastid [GO:0009536]	copper ion binding [GO:0005507];oxidoreductase activity [GO:0016491]	13	0	64.283	51	3.1	2.2	2.5	7.2	F4K658	F4K658	1012	At5g49555	FAD/NAD(P)-binding oxidoreductase family protein
290003471374512	291448669433594	289758815765381	292105293273926			hydrolase activity [GO:0016787]	22	0	101.23	163	16.7	15.9	24.9	20.2	F4K6N3	F4K6N3	1014	At5g07360	Amidase family protein
27961519241333	27908390045166	282044315338135	282594795227051		cell wall [GO:0005618];extracellular region [GO:0005576];plasmodesma [GO:0009506]	copper ion binding [GO:0005507];oxidoreductase activity [GO:0016491]	16	0	94.314	126	21.6	21.3	16.2	22.1	F4K6Z5	F4K6Z5	1015	At5g21105	Plant L-ascorbate oxidase
NaN	236389827728271	24485912322998	NaN			RNA binding [GO:0003723]	12	0	33.021	39	0	2.4	6.5	0	F4K703	F4K703	1016	LARP1a	LA RNA-binding protein
254393310546875	248010444641113	NaN	251660690307617	actin filament organization [GO:0007015];actin filament-based movement [GO:0030048];Golgi localization [GO:0051645];gynoecium development [GO:0048467];leaf pavement cell development [GO:0090436];mitochondrion localization [GO:0051646];peroxisome localization [GO:0060151];root hair elongation [GO:0048767];trichome morphogenesis [GO:0010090]	cytosol [GO:0005829];myosin complex [GO:0016459];peroxisome [GO:0005777]	actin binding [GO:0003779];ATP binding [GO:0005524];GTP-dependent protein binding [GO:0030742];motor activity [GO:0003774];Rab GTPase binding [GO:0017137]	31	0	101.76	89	0.6	1.2	0	0.6	F4K7C5	F4K7C5	1018	MYA2	Myosin 2
251243934631348	251125907897949	251012134552002	253682975769043			kinase activity [GO:0016301];phosphotransferase activity, alcohol group as acceptor [GO:0016773]	3	0	6.9459	9	6.6	6.6	6.6	8.2	F4K7C7	F4K7C7	1019	At5g43910	PfkB-like carbohydrate kinase family protein
260860023498535	260396747589111	251381721496582	236913642883301			tRNA methyltransferase activity [GO:0008175]	2	0	3.0251	11	13.1	13.1	13.1	13.1	F4K7Z6	F4K7Z6	1020	At5g01230	S-adenosyl-L-methionine-dependent methyltransferases superfamily protein
248992900848389	247610130310059	25884204864502	251347312927246	dephosphorylation of RNA polymerase II C-terminal domain [GO:0070940];developmental growth [GO:0048589];response to auxin [GO:0009733];response to osmotic stress [GO:0006970]		phosphatase activity [GO:0016791];RNA binding [GO:0003723];RNA polymerase II CTD heptapeptide repeat phosphatase activity [GO:0008420]	7	0	6.8518	19	1.9	1.9	1.2	1.9	F4K802	F4K802	1021	CPL2	Carboxyl-terminal domain (Ctd) phosphatase-like 2
29237174987793	285141620635986	288255367279053	283802623748779	exocytosis [GO:0006887];protein transport [GO:0015031]	cytosol [GO:0005829];exocyst [GO:0000145];plasma membrane [GO:0005886]		13	0	19.333	39	2.8	2.8	2.8	2.8	F4K8Y6	F4K8Y6	1023	EXO70F1	Exocyst subunit Exo70 family protein
247289962768555	241387577056885	NaN	24750675201416		plasmodesma [GO:0009506]		4	0	4.2855	8	6.9	2.2	0	7.3	F4K940	F4K940	1024	MIK19.5	Uncharacterized protein
262541275024414	265513916015625	267790641784668	267537879943848	protein phosphorylation [GO:0006468]	integral component of membrane [GO:0016021];plasma membrane [GO:0005886]	ATP binding [GO:0005524];transmembrane receptor protein serine/threonine kinase activity [GO:0004675]	6	0	16.801	29	3.3	4	4.2	2.7	F4K946	F4K946	1025	At5g56890	Protein kinase superfamily protein
250792007446289	243183097839355	247201499938965	249723300933838		cytoplasm [GO:0005737];cytosol [GO:0005829];nucleus [GO:0005634]	zinc ion binding [GO:0008270]	17	0	130.29	84	10.3	5.5	7.7	6.9	F4K9W6	F4K9W6	1027	MQJ16.2	ZPR1 zinc-finger domain protein
348367691040039	346841049194336	346402740478516	34629077911377	carbon fixation [GO:0015977];photorespiration [GO:0009853];photosynthesis [GO:0015979]	chloroplast [GO:0009507]	monooxygenase activity [GO:0004497];ribulose-bisphosphate carboxylase activity [GO:0016984]	26	0	323.31	378	67.2	67.2	67.2	67.2	F4KA76	F4KA76	1031	RBCS3B	Ribulose bisphosphate carboxylase small chain
258047428131104	259175243377686	258265800476074	257334518432617	methylation [GO:0032259]		methyltransferase activity [GO:0008168]	4	0	5.5611	22	13.5	6.3	11.7	8.1	F4KAB4	F4KAB4	1032	At5g44600	S-adenosyl-L-methionine-dependent methyltransferases superfamily protein
323896408081055	323780822753906	313606090545654	312622623443604	DNA replication initiation [GO:0006270];DNA unwinding involved in DNA replication [GO:0006268];double-strand break repair via break-induced replication [GO:0000727];mitotic DNA replication [GO:1902969];pre-replicative complex assembly involved in nuclear cell cycle DNA replication [GO:0006267]	MCM complex [GO:0042555];nucleus [GO:0005634];THO complex [GO:0000347]	ATP binding [GO:0005524];DNA helicase activity [GO:0003678];DNA replication origin binding [GO:0003688];metal ion binding [GO:0046872];single-stranded DNA binding [GO:0003697]	14	0	19.514	48	1.4	2.5	2.5	2.5	F4KAB8	F4KAB8	1033	MCM6	DNA replication licensing factor MCM6
25653133392334	NaN	255734901428223	254724941253662			syntaxin binding [GO:0019905]	4	0.0034722	1.9861	8	2.2	0	2.2	2.2	F4KAG0	F4KAG0	1034	At5g50840	Alpha-taxilin-like protein
24267993927002	245317192077637	249896678924561	249767932891846		chloroplast [GO:0009507]		2	0	5.7179	14	10.3	10.3	10.3	10.3	F4KAK0	F4KAK0	1035	MUL3.12	Tautomerase/MIF superfamily protein
25561653137207	265897808074951	277371826171875	275740528106689	cell morphogenesis [GO:0000902]	cell cortex [GO:0005938];plasma membrane [GO:0005886];site of polarized growth [GO:0030427]		16	0	30.506	57	0.9	0.9	0.5	0.5	F4KB73	F4KB73	1036	At5g15680	ARM repeat superfamily protein
27105396270752	275069561004639	280297050476074	279921569824219	fatty acid metabolic process [GO:0006631]	peroxisome [GO:0005777]	ligase activity [GO:0016874]	29	0	142.02	157	14.4	13.3	15.5	17.3	F4KBF3	F4KBF3	1037	AAE17	Probable acyl-activating enzyme 17, peroxisomal
287032566070557	276929874420166	290218391418457	286306552886963	tetrahydrobiopterin biosynthetic process [GO:0006729]		4-alpha-hydroxytetrahydrobiopterin dehydratase activity [GO:0008124]	10	0	135.17	103	27.5	41.5	35.2	43.5	F4KBV0	F4KBV0	1039	MWD22.5	Transcriptional coactivator/pterin dehydratase
271503505706787	NaN	281942272186279	NaN	defense response to fungus [GO:0050832];protein ubiquitination [GO:0016567];regulation of lipid catabolic process [GO:0050994];regulation of seed germination [GO:0010029];response to abscisic acid [GO:0009737];ubiquitin-dependent protein catabolic process [GO:0006511];ubiquitin-dependent protein catabolic process via the N-end rule pathway [GO:0071596]	cytoplasm [GO:0005737];ubiquitin ligase complex [GO:0000151]	ubiquitin protein ligase activity [GO:0061630];ubiquitin-protein transferase activity [GO:0004842];zinc ion binding [GO:0008270]	14	0	11.326	41	2.1	2.1	2.1	2.1	F4KCC2	F4KCC2	1041	PRT6	E3 ubiquitin-protein ligase PRT6
NaN	247770595550537	NaN	246581268310547		U5 snRNP [GO:0005682]		2	0	7.6761	11	0	3.7	0	3.7	F4KCL2	F4KCL2	1043	At5g09390	CD2-binding protein-like protein
240317058563232	243420448303223	242021713256836	240852127075195		plasma membrane [GO:0005886]		1	0.0071073	1.5844	10	2.9	2.9	2.9	2.9	F4KCX6	F4KCX6	1045	MQM1.23	Uncharacterized protein
247527694702148	248408622741699	252932319641113	24718843460083		apoplast [GO:0048046];cell wall [GO:0005618]	manganese ion binding [GO:0030145];nutrient reservoir activity [GO:0045735]	3	0	8.2068	38	8	8	8	8	F4KD16	F4KD16	1046	At5g39160	Germin-like protein
273169136047363	275148010253906	2762477684021	273919830322266			hydrolase activity [GO:0016787]	11	0	44.196	92	24.9	25.2	25.2	31.1	F4KDK1	F4KDK1	1047	MCK7.7	Calcineurin-like metallo-phosphoesterase superfamily protein
305524291992188	309216728210449	305116386413574	307826156616211	embryo development ending in seed dormancy [GO:0009793];tRNA aminoacylation for protein translation [GO:0006418];valyl-tRNA aminoacylation [GO:0006438]	chloroplast [GO:0009507];chloroplast stroma [GO:0009570];cytosol [GO:0005829];mitochondrion [GO:0005739]	aminoacyl-tRNA editing activity [GO:0002161];ATP binding [GO:0005524];valine-tRNA ligase activity [GO:0004832]	59	0	179.82	464	38.8	42.7	37.9	39	F4KE63	F4KE63	1048	EMB2247	Valine--tRNA ligase, chloroplastic/mitochondrial 2
NaN	259922218322754	NaN	259106330871582	regulation of protein serine/threonine phosphatase activity [GO:0080163];regulation of signal transduction [GO:0009966]	nucleus [GO:0005634];plastid [GO:0009536]	protein phosphatase inhibitor activity [GO:0004864]	4	0	7.2208	14	0	7.8	0	7.8	F4KEU1	F4KEU1	1050	I-2	Phosphoprotein phosphatase inhibitor
NaN	23881664276123	235908088684082	237375831604004	intracellular signal transduction [GO:0035556];peptidyl-serine phosphorylation [GO:0018105]	cytosol [GO:0005829]	ATP binding [GO:0005524];kinase activity [GO:0016301];protein serine/threonine kinase activity [GO:0004674]	10	0	81.702	32	0	3.3	4.7	4.7	F4KFD4	F4KFD4	1052	MYH9.10	Non-specific serine/threonine protein kinase
277397613525391	278434391021729	279107933044434	279007530212402	thiamine biosynthetic process [GO:0009228]	cytosol [GO:0005829];mitochondrion [GO:0005739]	thiaminase activity [GO:0050334];thiamine phosphate phosphatase activity [GO:0042131]	19	0	47.515	138	20.1	17.8	12.2	18.8	F4KFT7	F4KFT7	1053	TH2	Bifunctional TH2 protein, mitochondrial
299132785797119	300896739959717	300053081512451	299546298980713			serine-type endopeptidase activity [GO:0004252]	23	0	122.51	187	42.9	48.2	48.6	42.9	F4KFV6	F4KFV6	1054	DEG8	Trypsin family protein with PDZ domain-containing protein
287694797515869	289601936340332	290337009429932	291870212554932		nucleolus [GO:0005730];plastid [GO:0009536]	GTP binding [GO:0005525];GTPase activity [GO:0003924]	58	0	257.86	401	19.9	22.2	21.9	22	F4KG14	F4KG14	1056	MCL19.12	Guanylate-binding family protein
278625431060791	279822330474854	280132923126221	280509243011475	fructose 1,6-bisphosphate metabolic process [GO:0030388];gluconeogenesis [GO:0006094];glycolytic process [GO:0006096]	cytosol [GO:0005829]	fructose-bisphosphate aldolase activity [GO:0004332]	21	0	27.497	84	23.2	38.4	30.3	29.8	F4KGQ0	F4KGQ0	1059	FBA4	Fructose-bisphosphate aldolase 4, cytosolic
308269157409668	309492816925049	308166542053223	308975696563721	lytic vacuole organization [GO:0080171]	chloroplast [GO:0009507];cytosol [GO:0005829];plasma membrane [GO:0005886]	kinase activity [GO:0016301]	189	0	323.31	1399	24.9	29.2	21.5	25.8	F4KHD5	F4KHD5	1060	MPO12.160	A-kinase anchor-like protein
29358377456665	291334972381592	290200653076172	290493927001953		chloroplast thylakoid lumen [GO:0009543];thylakoid lumen [GO:0031977]	endopeptidase activity [GO:0004175];serine-type peptidase activity [GO:0008236]	24	0	88.135	124	39.5	34.6	33.3	37.4	F4KHG6	F4KHG6	1061	CTPA1	Carboxyl-terminal-processing peptidase 1, chloroplastic
228201656341553	233853492736816	NaN	NaN			serine-type endopeptidase activity [GO:0004252]	19	0	70.618	108	1.4	1.4	0	0	F4KHS1	F4KHS1	1063	SBT4.12	Subtilase 4.12
248452243804932	249932155609131	277584342956543	27794454574585	D-serine biosynthetic process [GO:0070179];L-serine biosynthetic process [GO:0006564]		phosphatase activity [GO:0016791];phosphoserine phosphatase activity [GO:0004647]	21	0	79.614	75	4.6	5.5	4.2	4.2	F4KI56	F4KI56	1064	IPSP	Metal-independent phosphoserine phosphatase
236449337005615	256666297912598	228764457702637	23266565322876	pollen development [GO:0009555]	plasma membrane [GO:0005886];plastid [GO:0009536]		55	0	317.84	281	0.8	1.5	1.6	1.4	F4KIH8	F4KIH8	1066	MXC17.10	Transducin/WD40 repeat-like superfamily protein
NaN	246214828491211	259745845794678	NaN	methylation [GO:0032259];oxidation-reduction process [GO:0055114];siroheme biosynthetic process [GO:0019354]		methyltransferase activity [GO:0008168]	3	0	10.733	12	0	10	3.4	0	F4KIS7	F4KIS7	1067	UPM1	Urophorphyrin methylase 1
256087112426758	253572635650635	275960521697998	251938514709473	autophagosome assembly [GO:0000045];autophagy of mitochondrion [GO:0000422];autophagy of nucleus [GO:0044804];autophagy of peroxisome [GO:0030242];defense response to bacterium, incompatible interaction [GO:0009816];defense response to fungus [GO:0050832];leaf senescence [GO:0010150];protein transport [GO:0015031]	extrinsic component of membrane [GO:0019898];phagophore assembly site [GO:0000407]		9	0	7.8369	14	1.6	1.1	0.5	0.6	F8S296	F8S296	1070	ATG2	Autophagy-related protein 2
386975746154785	386445045471191	38684211730957	387030982971191	photorespiration [GO:0009853];reductive pentose-phosphate cycle [GO:0019253];response to abscisic acid [GO:0009737];response to cadmium ion [GO:0046686]	apoplast [GO:0048046];cell wall [GO:0005618];chloroplast [GO:0009507];chloroplast envelope [GO:0009941];chloroplast stroma [GO:0009570];chloroplast thylakoid membrane [GO:0009535];cytosolic ribosome [GO:0022626];plastid [GO:0009536];plastoglobule [GO:0010287];thylakoid [GO:0009579]	magnesium ion binding [GO:0000287];monooxygenase activity [GO:0004497];ribulose-bisphosphate carboxylase activity [GO:0016984]	97	0	323.31	9549	76.6	77.7	77.7	76.6	O03042;REV__Q9FRK9	O03042	1072	rbcL	Ribulose bisphosphate carboxylase large chain
258335208892822	267663555145264	268871612548828	244419612884521	defense response to fungus [GO:0050832];response to desiccation [GO:0009269];response to high light intensity [GO:0009644];response to wounding [GO:0009611]	cytosol [GO:0005829]		8	0	20.277	21	29.1	7.3	7.3	24.5	O03983	O03983	1073	LEA14	Probable desiccation-related protein LEA14
NaN	24854528427124	225934314727783	216858577728271	cellular response to heat [GO:0034605];protein folding [GO:0006457];protein stabilization [GO:0050821]	apoplast [GO:0048046];cell surface [GO:0009986];cell wall [GO:0005618];chloroplast stroma [GO:0009570];cytoplasm [GO:0005737];cytosol [GO:0005829];Golgi apparatus [GO:0005794];nucleus [GO:0005634];perinuclear region of cytoplasm [GO:0048471];plasma membrane [GO:0005886];plastid [GO:0009536];protein-containing complex [GO:0032991];vacuolar membrane [GO:0005774]	ATP binding [GO:0005524];unfolded protein binding [GO:0051082]	114	0	106.75	94	56.8	64.4	62.1	58.2	O03986	O03986	1074	HSP90-4	Heat shock protein 90-4
256351947784424	241369609832764	25476146697998	245232486724854	embryo sac development [GO:0009553];glucose mediated signaling pathway [GO:0010255];pollen development [GO:0009555];positive regulation of RNA polymerase II transcription preinitiation complex assembly [GO:0045899];proteasomal protein catabolic process [GO:0010498];regulation of transcription by RNA polymerase II [GO:0006357]	cytosol [GO:0005829];extracellular region [GO:0005576];nucleus [GO:0005634];plasma membrane [GO:0005886];proteasome complex [GO:0000502];proteasome regulatory particle, base subcomplex [GO:0008540];protein-containing complex [GO:0032991]	ATP binding [GO:0005524];hydrolase activity [GO:0016787]	37	0	27.211	23	8	9.5	6.9	6.4	O04019	O04019	1075	RPT5B	26S proteasome regulatory subunit 6A homolog B
268657302856445	265155696868896	265290546417236	271052951812744	cellular response to hypoxia [GO:0071456];protein targeting to vacuole [GO:0006623]	endoplasmic reticulum [GO:0005783];endoplasmic reticulum membrane [GO:0005789];extracellular region [GO:0005576];integral component of membrane [GO:0016021];plasma membrane [GO:0005886];protein storage vacuole [GO:0000326];protein storage vacuole membrane [GO:0032586]		10	0	27.361	33	11.7	10.5	13	16	O04023	O04023	1076	SRC2	Protein SRC2 homolog
240125675201416	245192928314209	231034965515137	235085735321045			phosphatase activity [GO:0016791]	5	0	24.859	15	5.7	5.7	7.1	12.8	O04035	O04035	1077	At1g08940	Phosphoglycerate mutase-like protein AT74H
270925483703613	270534133911133	285376415252686	283774108886719	response to karrikin [GO:0080167]	chloroplast [GO:0009507];chloroplast stroma [GO:0009570]	2 iron, 2 sulfur cluster binding [GO:0051537];electron transfer activity [GO:0009055];metal ion binding [GO:0046872]	4	0	99.936	46	57.4	57.4	57.4	57.4	O04090	O04090	1078	FD1	Ferredoxin-1, chloroplastic
31090051651001	31141996383667	310519351959229	310508346557617	cellular amino acid metabolic process [GO:0006520];L-serine biosynthetic process [GO:0006564]	chloroplast [GO:0009507];chloroplast stroma [GO:0009570];cytosol [GO:0005829];nucleus [GO:0005634]	NAD binding [GO:0051287];phosphoglycerate dehydrogenase activity [GO:0004617]	46	0	323.31	523	46	51.3	49.2	54.6	O04130	O04130	1079	PGDH2	D-3-phosphoglycerate dehydrogenase 2, chloroplastic
274066543579102	273968086242676	270705051422119	272326984405518	cyclic nucleotide metabolic process [GO:0009187];tRNA splicing, via endonucleolytic cleavage and ligation [GO:0006388]	cytoplasm [GO:0005737];cytosol [GO:0005829]	2',3'-cyclic-nucleotide 3'-phosphodiesterase activity [GO:0004113]	12	0	63.714	73	44.8	44.8	29.8	33.7	O04147	O04147	1080	At4g18930	Cyclic phosphodiesterase
317378768920898	316192073822021	313907947540283	315095634460449	endoplasmic reticulum unfolded protein response [GO:0030968];protein folding [GO:0006457];response to cadmium ion [GO:0046686];response to endoplasmic reticulum stress [GO:0034976];response to oxidative stress [GO:0006979]	endoplasmic reticulum [GO:0005783];endoplasmic reticulum lumen [GO:0005788];endoplasmic reticulum membrane [GO:0005789];mitochondrion [GO:0005739];nucleus [GO:0005634];plasmodesma [GO:0009506];secretory vesicle [GO:0099503];vacuolar membrane [GO:0005774]	calcium ion binding [GO:0005509];carbohydrate binding [GO:0030246];unfolded protein binding [GO:0051082]	60	0	323.31	612	63.3	68.9	70.6	71.1	O04151	O04151	1081	CRT1	Calreticulin-1
323681755065918	322140502929688	322131233215332	322148323059082	anthocyanin-containing compound metabolic process [GO:0046283];defense response to bacterium [GO:0042742];endoplasmic reticulum unfolded protein response [GO:0030968];innate immune response-activating signal transduction [GO:0002758];plant-type hypersensitive response [GO:0009626];protein folding [GO:0006457]	endoplasmic reticulum [GO:0005783];endoplasmic reticulum lumen [GO:0005788];endoplasmic reticulum membrane [GO:0005789];extracellular region [GO:0005576]	calcium ion binding [GO:0005509];carbohydrate binding [GO:0030246];unfolded protein binding [GO:0051082]	46	0	323.31	499	61.6	63.2	64.9	64.9	O04153	O04153	1082	CRT3	Calreticulin-3
292577514648438	294330272674561	293423385620117	295569305419922	amylopectin biosynthetic process [GO:0010021];starch biosynthetic process [GO:0019252];starch catabolic process [GO:0005983]	chloroplast [GO:0009507];chloroplast isoamylase complex [GO:0010368]	isoamylase activity [GO:0019156]	17	0	45.334	81	12.3	16.6	10.1	15.2	O04196	O04196	1084	ISA1	Isoamylase 1, chloroplastic
273424015045166	277221450805664	277991561889648	274528541564941	anther dehiscence [GO:0009901];defense response [GO:0006952];defense response to bacterium [GO:0042742];defense response to fungus [GO:0050832];extracellular ATP signaling [GO:0106167];jasmonic acid and ethylene-dependent systemic resistance [GO:0009861];jasmonic acid mediated signaling pathway [GO:0009867];negative regulation of defense response [GO:0031348];protein ubiquitination [GO:0016567];r…			12	0	20.518	56	10.8	15	11.5	16.6	O04197	O04197	1085	COI1	Coronatine-insensitive protein 1
282960529327393	283128528594971	282402725219727	281609649658203	embryo development ending in seed dormancy [GO:0009793];formation of cytoplasmic translation initiation complex [GO:0001732];pollen germination [GO:0009846];response to sucrose [GO:0009744];translational initiation [GO:0006413]	cytoplasm [GO:0005737];cytosol [GO:0005829];eukaryotic 43S preinitiation complex [GO:0016282];eukaryotic 48S preinitiation complex [GO:0033290];eukaryotic translation initiation factor 3 complex, eIF3m [GO:0071541];Golgi apparatus [GO:0005794];nucleus [GO:0005634]	translation initiation factor activity [GO:0003743];translation initiation factor binding [GO:0031369]	18	0	323.31	175	9.6	9.6	9.6	9.6	O04202	O04202	1086	TIF3F1	Eukaryotic translation initiation factor 3 subunit F
258839244842529	260794658660889	257021331787109	25441707611084	defense response [GO:0006952];NLS-bearing protein import into nucleus [GO:0006607]	cytosol [GO:0005829];host cell nucleus [GO:0042025];nucleus [GO:0005634]	nuclear import signal receptor activity [GO:0061608];nuclear localization sequence binding [GO:0008139]	23	0	80.634	66	16	11.9	11.9	11.9	O04294	O04294	1089	IMPA3	Importin subunit alpha-3
312627658843994	311514625549316	313247451782227	313141384124756	response to cold [GO:0009409];response to jasmonic acid [GO:0009753];response to wounding [GO:0009611];vegetative to reproductive phase transition of meristem [GO:0010228]	chloroplast [GO:0009507];cytosol [GO:0005829];nucleus [GO:0005634];plasmodesma [GO:0009506];vacuole [GO:0005773]	carbohydrate binding [GO:0030246]	44	0	323.31	657	77.6	80.5	83.8	74.9	O04309	O04309	1091	JAL35	Jacalin-related lectin 35
265103569030762	26549337387085	266901912689209	264696102142334	response to cold [GO:0009409]	cytosol [GO:0005829];nucleus [GO:0005634];plasmodesma [GO:0009506]	carbohydrate binding [GO:0030246];copper ion binding [GO:0005507]	54	0	323.31	593	12.6	15.6	17	21.4	O04310	O04310	1092	JAL34	Jacalin-related lectin 34
NaN	2105735206604	NaN	227977256774902	response to cold [GO:0009409];response to zinc ion [GO:0010043]	nucleus [GO:0005634];plasmodesma [GO:0009506]	carbohydrate binding [GO:0030246]	40	0	323.31	407	0	9	0	10.3	O04311	O04311	1093	JAL33	Jacalin-related lectin 33
283375606536865	261885414123535	261510848999023	285511283874512		cytosol [GO:0005829]	carbohydrate binding [GO:0030246];copper ion binding [GO:0005507]	30	0	279.61	138	15.9	22	9.8	13.5	O04313	O04313	1094	PBP2	PYK10-binding protein 2
276967716217041	277733535766602	275191593170166	28325216293335	protein folding [GO:0006457];regulation of hydrolase activity [GO:0051336]	cytosol [GO:0005829];nucleus [GO:0005634];plasmodesma [GO:0009506]	carbohydrate binding [GO:0030246];copper ion binding [GO:0005507];enzyme regulator activity [GO:0030234]	44	0	323.31	759	49.7	45	28.9	38.3	O04314	O04314	1095	PBP1	PYK10-binding protein 1
310715026855469	309485855102539	308576412200928	310139827728271	glucosinolate catabolic process [GO:0019762];nitrile biosynthetic process [GO:0080028]	cytosol [GO:0005829];nucleus [GO:0005634];plasmodesma [GO:0009506]	carbohydrate binding [GO:0030246];enzyme regulator activity [GO:0030234]	68	0	323.31	981	30.2	27.5	27.8	29.7	O04316	O04316	1096	NSP4	Nitrile-specifier protein 4
284109859466553	283975830078125	289133358001709	297725048065186	glucosinolate catabolic process [GO:0019762];nitrile biosynthetic process [GO:0080028]	chloroplast [GO:0009507];cytosol [GO:0005829];nucleus [GO:0005634]	carbohydrate binding [GO:0030246];enzyme regulator activity [GO:0030234]	31	0	277.51	125	12	15	9.4	12	O04318	O04318	1097	NSP3	Nitrile-specifier protein 3
28962703704834	291030197143555	290646858215332	290299949645996	auxin metabolic process [GO:0009850];response to wounding [GO:0009611]	endoplasmic reticulum [GO:0005783];endoplasmic reticulum lumen [GO:0005788];nucleus [GO:0005634];plasma membrane [GO:0005886]	hydrolase activity [GO:0016787];IAA-Ala conjugate hydrolase activity [GO:0010179];metal ion binding [GO:0046872]	28	0	312.95	277	27.7	30	36.6	29.5	O04373	O04373	1098	ILL4	IAA-amino acid hydrolase ILR1-like 4
268842506408691	267242946624756	266360263824463	265984668731689	brassinosteroid mediated signaling pathway [GO:0009742];megasporogenesis [GO:0009554];meiotic sister chromatid cohesion [GO:0051177];microsporogenesis [GO:0009556];protein dephosphorylation [GO:0006470];regulation of protein autophosphorylation [GO:0031952]	cytoplasm [GO:0005737];cytosol [GO:0005829];nucleus [GO:0005634];protein phosphatase type 2A complex [GO:0000159]	protein phosphatase activator activity [GO:0072542]	11	0	11.399	56	6	9.6	9.4	6	O04376	O04376	1099	B'BETA	Serine/threonine protein phosphatase 2A 57 kDa regulatory subunit B' beta isoform
29122652053833	293305683135986	293410015106201	294530506134033	adaxial/abaxial pattern specification [GO:0009955];adventitious root development [GO:0048830];auxin metabolic process [GO:0009850];cell differentiation [GO:0030154];defense response to virus [GO:0051607];gene silencing by miRNA [GO:0035195];innate immune response [GO:0045087];leaf morphogenesis [GO:0009965];leaf proximal/distal pattern formation [GO:0010589];leaf vascular tissue pattern formation…	cytoplasm [GO:0005737];cytosol [GO:0005829];nucleus [GO:0005634]	endoribonuclease activity [GO:0004521];metal ion binding [GO:0046872];miRNA binding [GO:0035198];mRNA binding [GO:0003729]	37	0	111.99	279	20.8	18.2	20.4	23.7	O04379	O04379	1100	2001-08-01	Protein argonaute 1
279956111907959	284748706817627	284607639312744	286082668304443	peroxisome organization [GO:0007031];purine nucleobase metabolic process [GO:0006144];urate catabolic process [GO:0019628]	cytosol [GO:0005829];peroxisome [GO:0005777]	urate oxidase activity [GO:0004846]	29	0	211.36	266	43.4	44.7	39.2	47.2	O04420	O04420	1101	At2g26230	Uricase
301278018951416	301831684112549	302158145904541	301363849639893	protein folding [GO:0006457]	chaperonin-containing T-complex [GO:0005832];cytosol [GO:0005829];nucleus [GO:0005634];plasma membrane [GO:0005886];plasmodesma [GO:0009506]	ATP binding [GO:0005524];unfolded protein binding [GO:0051082]	60	0	323.31	473	41.5	39.3	38.5	34.6	O04450	O04450	1103	CCT5	T-complex protein 1 subunit epsilon
2646706199646	265708293914795	267766819000244	267034549713135	protein deubiquitination [GO:0016579];shoot system morphogenesis [GO:0010016];ubiquitin-dependent protein catabolic process [GO:0006511]	cytoplasm [GO:0005737];nucleus [GO:0005634]	thiol-dependent ubiquitin-specific protease activity [GO:0004843]	12	0	16.07	80	9.4	5.8	13.9	11.8	O04482	O04482	1104	UCH2	Ubiquitin carboxyl-terminal hydrolase 2
323612899780273	324607048034668	323874359130859	324362144470215		cytosol [GO:0005829];extracellular region [GO:0005576];plasma membrane [GO:0005886];plasmodesma [GO:0009506];vacuole [GO:0005773]	translation elongation factor activity [GO:0003746]	55	0	323.31	880	68.6	66.7	66.4	68.4	O04487	O04487	1106	At1g09640	Probable elongation factor 1-gamma 1
239805030822754	236732521057129	23260835647583	232569541931152	leaf proximal/distal pattern formation [GO:0010589];leaf vascular tissue pattern formation [GO:0010305];mRNA cleavage involved in gene silencing by miRNA [GO:0035279];pre-miRNA processing [GO:0031054];primary miRNA processing [GO:0031053];production of miRNAs involved in gene silencing by miRNA [GO:0035196];production of siRNA involved in RNA interference [GO:0030422];production of ta-siRNAs invo…	nuclear dicing body [GO:0010445];nuclear speck [GO:0016607];nucleus [GO:0005634]	double-stranded RNA binding [GO:0003725];identical protein binding [GO:0042802];miRNA binding [GO:0035198];ribonuclease III activity [GO:0004525]	2	0	5.1712	10	13.1	13.1	13.1	13.1	O04492	O04492	1107	DRB1	Double-stranded RNA-binding protein 1
336123695373535	336321182250977	336742973327637	337159996032715	protein catabolic process [GO:0030163];proteolysis [GO:0006508];regulation of programmed cell death [GO:0043067];systemic acquired resistance [GO:0009627]	apoplast [GO:0048046];cell wall [GO:0005618];secretory vesicle [GO:0099503]	aspartic-type endopeptidase activity [GO:0004190];nucleotide binding [GO:0000166]	20	0	323.31	481	28.7	36.3	30.7	36.3	O04496	O04496	1108	AED3	Aspartyl protease AED3
341469497680664	342034683227539	34242748260498	342558898925781	cellular carbohydrate metabolic process [GO:0044262];glucose catabolic process [GO:0006007];glycolytic process [GO:0006096];pollen development [GO:0009555];response to cadmium ion [GO:0046686];response to cold [GO:0009409];stomatal movement [GO:0010118]	chloroplast [GO:0009507];cytosol [GO:0005829];extracellular region [GO:0005576];mitochondrial envelope [GO:0005740];plasma membrane [GO:0005886];plasmodesma [GO:0009506]	2,3-bisphosphoglycerate-independent phosphoglycerate mutase activity [GO:0046537];manganese ion binding [GO:0030145]	86	0	323.31	2488	90.8	97.7	91.4	96.8	O04499	O04499	1109	PGM1	2,3-bisphosphoglycerate-independent phosphoglycerate mutase 1
277129287719727	280990867614746	277838802337646	277940826416016		cytosol [GO:0005829]		12	0	37.106	64	25	26.9	32.8	27.9	O04551	O04551	1111	At1g27020	Plant/protein
251178703308105	249065570831299	NaN	253868293762207	ribosomal large subunit assembly [GO:0000027];translation [GO:0006412]	chloroplast [GO:0009507];chloroplast envelope [GO:0009941];chloroplast stroma [GO:0009570];cytosol [GO:0005829];cytosolic ribosome [GO:0022626]	RNA binding [GO:0003723];rRNA binding [GO:0019843];structural constituent of ribosome [GO:0003735]	4	0.00094162	2.4944	8	6.5	6.5	0	3.1	O04603	O04603	1112	RPL5	50S ribosomal protein L5, chloroplastic
277784385681152	276427879333496	278551330566406	27825174331665		Golgi apparatus [GO:0005794];integral component of membrane [GO:0016021]	O-acetyltransferase activity [GO:0016413]	12	0	61.226	65	21.5	21.9	15.6	15.6	O04621	O04621	1113	TBL26	Protein trichome birefringence-like 26
311892509460449	311761112213135	312116432189941	311698532104492	threonyl-tRNA aminoacylation [GO:0006435];tRNA aminoacylation for protein translation [GO:0006418]	cell wall [GO:0005618];chloroplast [GO:0009507];cytosol [GO:0005829];mitochondrion [GO:0005739];plasma membrane [GO:0005886];plastid [GO:0009536]	aminoacyl-tRNA ligase activity [GO:0004812];ATP binding [GO:0005524];metal ion binding [GO:0046872];threonine-tRNA ligase activity [GO:0004829]	82	0	323.31	813	60.5	59.8	62.9	63.5	O04630	O04630	1114	THRRS	Threonine--tRNA ligase, mitochondrial 1
271320266723633	269513816833496	26666820526123	272048988342285	negative regulation of defense response to virus [GO:0050687];response to virus [GO:0009615]	cytoplasm [GO:0005737];cytosol [GO:0005829];eukaryotic translation initiation factor 4F complex [GO:0016281];mRNA cap binding complex [GO:0005845];nucleus [GO:0005634];plastid [GO:0009536]	RNA 7-methylguanosine cap binding [GO:0000340];translation initiation factor activity [GO:0003743]	13	0	30.516	83	36.9	31.3	20.7	37.4	O04663	O04663	1116	EIF(ISO)4E	Eukaryotic translation initiation factor isoform 4E
27137020111084	276369247436523	27181583404541	274227809906006	one-carbon metabolic process [GO:0006730]	chloroplast stroma [GO:0009570];endoplasmic reticulum [GO:0005783]	carbonate dehydratase activity [GO:0004089];hydro-lyase activity [GO:0016836];zinc ion binding [GO:0008270]	9	0	18.158	50	17.6	19.4	18	16.2	O04846	O04846	1118	ACA1	Alpha carbonic anhydrase 1, chloroplastic
298964862823486	301076164245605	302048988342285	301687793731689	'de novo' pyrimidine nucleobase biosynthetic process [GO:0006207];'de novo' UMP biosynthetic process [GO:0044205];pyrimidine nucleotide biosynthetic process [GO:0006221]	chloroplast [GO:0009507];cytoplasm [GO:0005737];cytosol [GO:0005829];mitochondrion [GO:0005739]	dihydroorotase activity [GO:0004151];metal ion binding [GO:0046872]	24	0	206.8	300	48.8	44.3	54.4	45.1	O04904	O04904	1119	PYR4	Dihydroorotase, mitochondrial
28944751739502	290284938812256	291200828552246	291796627044678	CDP biosynthetic process [GO:0046705];'de novo' pyrimidine nucleobase biosynthetic process [GO:0006207];purine nucleotide metabolic process [GO:0006163];pyrimidine nucleotide biosynthetic process [GO:0006221];pyrimidine ribonucleoside monophosphate metabolic process [GO:0009173];UDP biosynthetic process [GO:0006225]	cytoplasm [GO:0005737];cytosol [GO:0005829];nucleus [GO:0005634];plastid [GO:0009536]	ATP binding [GO:0005524];cytidylate kinase activity [GO:0004127];UMP kinase activity [GO:0033862];uridylate kinase activity [GO:0009041]	25	0	129.22	243	52	51.5	57.4	32.7	O04905	O04905	1120	UMK3	UMP-CMP kinase 3
286715850830078	286351261138916	285904941558838	286461582183838	response to oxidative stress [GO:0006979]	cytosol [GO:0005829];nucleus [GO:0005634];peroxisome [GO:0005777];plasma membrane [GO:0005886]	glutathione peroxidase activity [GO:0004602];peroxidase activity [GO:0004601]	31	0	229.77	265	62.7	63.3	65.1	50.9	O04922	O04922	1121	GPX2	Probable glutathione peroxidase 2
318831443786621	320067481994629	319369125366211	319458332061768	fatty acid biosynthetic process [GO:0006633];malonyl-CoA biosynthetic process [GO:2001295]	chloroplast [GO:0009507]	acetyl-CoA carboxylase activity [GO:0003989];ATP binding [GO:0005524];biotin carboxylase activity [GO:0004075];metal ion binding [GO:0046872]	53	0	323.31	991	63.9	74.7	71.1	73.6	O04983	O04983	1123	CAC2	Biotin carboxylase, chloroplastic
334541511535645	335886650085449	335270576477051	336259269714355		anchored component of membrane [GO:0031225];anchored component of plasma membrane [GO:0046658];apoplast [GO:0048046];cytosol [GO:0005829];plasma membrane [GO:0005886];secretory vesicle [GO:0099503]		33	0	323.31	811	50.2	50.2	50.2	50.2	O22126	O22126	1125	FLA8	Fasciclin-like arabinogalactan protein 8
265275802612305	264455642700195	256905651092529	2592333984375	cell wall modification [GO:0042545];defense response to Gram-negative bacterium [GO:0050829];pectin catabolic process [GO:0045490];response to bacterium [GO:0009617];response to fungus [GO:0009620]	cell wall [GO:0005618];extracellular region [GO:0005576]	aspartyl esterase activity [GO:0045330];pectinesterase activity [GO:0030599];pectinesterase inhibitor activity [GO:0046910]	26	0	323.31	183	5.5	7.2	10.4	4.1	O22149	O22149	1127	PME17	Probable pectinesterase/pectinesterase inhibitor 17
303388366699219	305978813171387	310260429382324	298195667266846		chloroplast [GO:0009507];chloroplast thylakoid [GO:0009534];chloroplast thylakoid lumen [GO:0009543];chloroplast thylakoid membrane [GO:0009535];cytosol [GO:0005829];thylakoid [GO:0009579];thylakoid lumen [GO:0031977]		14	0	323.31	209	55.8	54.5	55.8	55.8	O22160	O22160	1128	At2g44920	Thylakoid lumenal 15 kDa protein 1, chloroplastic
322152633666992	322292861938477	320984230041504	321294593811035	regulation of translation [GO:0006417];response to cadmium ion [GO:0046686];viral process [GO:0016032]	cytoplasm [GO:0005737];cytosol [GO:0005829];nucleus [GO:0005634];ribonucleoprotein complex [GO:1990904];vacuole [GO:0005773]	mRNA 3'-UTR binding [GO:0003730];mRNA binding [GO:0003729];poly(A) binding [GO:0008143];poly(U) RNA binding [GO:0008266];RNA binding [GO:0003723]	65	0	323.31	939	50.2	47.1	45.9	45.9	O22173	O22173	1129	PAB4	Polyadenylate-binding protein 4
261626739501953	258335933685303	256287593841553	25828275680542	protein autophosphorylation [GO:0046777]	integral component of membrane [GO:0016021];plasma membrane [GO:0005886];plasmodesma [GO:0009506];vacuole [GO:0005773]	ATP binding [GO:0005524];protein kinase activity [GO:0004672];protein serine/threonine kinase activity [GO:0004674]	5	0.00057176	2.6999	37	3.4	4.6	5.6	4.6	O22187	O22187	1130	At2g23200	Probable receptor-like protein kinase At2g23200
260105419158936	256771831512451	25989408493042	258957366943359	coumarin biosynthetic process [GO:0009805];flavonoid biosynthetic process [GO:0009813];lignin biosynthetic process [GO:0009809];phenylpropanoid biosynthetic process [GO:0009699]	cytosol [GO:0005829];endoplasmic reticulum [GO:0005783];integral component of membrane [GO:0016021];intracellular membrane-bounded organelle [GO:0043231];membrane [GO:0016020];mitochondrion [GO:0005739];plasma membrane [GO:0005886]	heme binding [GO:0020037];identical protein binding [GO:0042802];iron ion binding [GO:0005506];monooxygenase activity [GO:0004497];oxidoreductase activity, acting on paired donors, with incorporation or reduction of molecular oxygen, NAD(P)H as one donor, and incorporation of one atom of oxygen [GO:0016709];p-coumarate 3-hydroxylase activity [GO:0046409]	7	0	7.6626	40	3	3	3	3	O22203	O22203	1131	CYP98A3	Cytochrome P450 98A3
209619045257568	21021879196167	213643684387207	NaN	cell fate determination [GO:0001709];cell-cell signaling [GO:0007267];embryo sac development [GO:0009553];embryo sac egg cell differentiation [GO:0009560];mRNA splicing, via spliceosome [GO:0000398]	nuclear speck [GO:0016607];spliceosomal complex [GO:0005681];U4/U6 x U5 tri-snRNP complex [GO:0046540]	U4 snRNA binding [GO:0030621];U6 snRNA binding [GO:0017070]	12	0	22.902	34	2.5	2.5	2.5	3.2	O22212	O22212	1133	LIS	U4/U6 small nuclear ribonucleoprotein PRP4-like protein
NaN	NaN	24146858215332	235478076934814	carbohydrate metabolic process [GO:0005975];glycerol-3-phosphate catabolic process [GO:0046168];glycerol-3-phosphate metabolic process [GO:0006072];NADH oxidation [GO:0006116]	cytosol [GO:0005829];glycerol-3-phosphate dehydrogenase complex [GO:0009331]	glycerol-3-phosphate dehydrogenase [NAD+] activity [GO:0004367];NAD binding [GO:0051287]	9	0	13.17	37	0	0	3.7	3.7	O22216	O22216	1134	GPDHC1	Glycerol-3-phosphate dehydrogenase [NAD(+)] GPDHC1, cytosolic
324473419189453	324846229553223	325192985534668	325346145629883	cell redox homeostasis [GO:0045454];hydrogen peroxide catabolic process [GO:0042744];positive regulation of catalytic activity [GO:0043085];regulation of chlorophyll biosynthetic process [GO:0010380];regulation of starch biosynthetic process [GO:0010581];removal of superoxide radicals [GO:0019430]	chloroplast [GO:0009507];chloroplast stroma [GO:0009570];cytosol [GO:0005829]	enzyme activator activity [GO:0008047];identical protein binding [GO:0042802];oxidoreductase activity, acting on a sulfur group of donors, disulfide as acceptor [GO:0016671];thioredoxin-disulfide reductase activity [GO:0004791]	33	0	323.31	459	45.9	46.3	48.4	48.4	O22229	O22229	1136	NTRC	NADPH-dependent thioredoxin reductase 3
255477504730225	275747756958008	NaN	276214275360107	defense response [GO:0006952];L-phenylalanine biosynthetic process [GO:0009094];response to karrikin [GO:0080167]	chloroplast [GO:0009507];chloroplast stroma [GO:0009570];cytoplasm [GO:0005737]	arogenate dehydratase activity [GO:0047769];prephenate dehydratase activity [GO:0004664]	14	0	160.12	39	8.5	12	3.1	8	O22241	O22241	1137	ADT4	Arogenate dehydratase 4, chloroplastic
322006645202637	322608032226563	321516456604004	322382850646973	cell redox homeostasis [GO:0045454];double fertilization forming a zygote and endosperm [GO:0009567];embryo development ending in seed dormancy [GO:0009793];embryo sac development [GO:0009553];pollen tube development [GO:0048868];response to cadmium ion [GO:0046686];response to endoplasmic reticulum stress [GO:0034976]	cytosol [GO:0005829];endoplasmic reticulum [GO:0005783];plant-type cell wall [GO:0009505];secretory vesicle [GO:0099503];vacuolar membrane [GO:0005774]	protein disulfide isomerase activity [GO:0003756]	57	0	323.31	829	85.6	86.1	86.1	86.1	O22263	O22263	1138	PDIL2-1	Protein disulfide-isomerase like 2-1
290475215911865	289497680664063	284768028259277	281751708984375	protein heterotrimerization [GO:0070208];protein import into chloroplast thylakoid membrane [GO:0045038];response to high light intensity [GO:0009644]	chloroplast [GO:0009507];chloroplast envelope [GO:0009941];chloroplast stroma [GO:0009570];chloroplast thylakoid membrane [GO:0009535];cytosol [GO:0005829];protein-containing complex [GO:0032991];signal recognition particle, chloroplast targeting [GO:0080085];signal recognition particle, endoplasmic reticulum targeting [GO:0005786]	disordered domain specific binding [GO:0097718];identical protein binding [GO:0042802];metal ion binding [GO:0046872];protein domain specific binding [GO:0019904];protein-macromolecule adaptor activity [GO:0030674]	12	0	27.03	89	23.9	22.3	22.8	30.6	O22265	O22265	1139	CAO	Signal recognition particle 43 kDa protein, chloroplastic
29853364944458	300402240753174	3014430809021	299759635925293	cellulose biosynthetic process [GO:0030244];defense response to bacterium [GO:0042742];GDP-mannose biosynthetic process [GO:0009298];L-ascorbic acid biosynthetic process [GO:0019853];response to ammonium ion [GO:0060359];response to heat [GO:0009408];response to jasmonic acid [GO:0009753];response to ozone [GO:0010193];response to salt stress [GO:0009651]	cytosol [GO:0005829];nucleus [GO:0005634]	GTP binding [GO:0005525];mannose-1-phosphate guanylyltransferase activity [GO:0004475]	34	0	179.85	336	38.8	47.4	31.6	44.6	O22287	O22287	1141	CYT1	Mannose-1-phosphate guanylyltransferase 1
248517665863037	NaN	240878849029541	24937686920166	mRNA cis splicing, via spliceosome [GO:0045292];regulation of alternative mRNA splicing, via spliceosome [GO:0000381]	interchromatin granule [GO:0035061];nuclear speck [GO:0016607];nucleus [GO:0005634];spliceosomal complex [GO:0005681]	mRNA binding [GO:0003729];RNA binding [GO:0003723]	18	0	45.224	77	5	0	4	2.6	O22315	O22315	1142	SR34	Serine/arginine-rich-splicing factor SR34
272936000823975	269691696166992	263661804199219	271137638092041	DNA replication [GO:0006260];embryo development ending in seed dormancy [GO:0009793];flower development [GO:0009908];heterochromatin assembly [GO:0031507];heterochromatin organization [GO:0070828];leaf development [GO:0048366];multicellular organism development [GO:0007275];pollen development [GO:0009555];positive regulation of cell cycle [GO:0045787];regulation of flower development [GO:0009909]…	chromatin silencing complex [GO:0005677];Cul4-RING E3 ubiquitin ligase complex [GO:0080008];nucleus [GO:0005634]		16	0	39.428	103	15.6	14.6	12.5	14.9	O22467	O22467	1144	MSI1	Histone-binding protein MSI1
275425930023193	275715236663818	279160442352295	274315738677979	chromatin organization [GO:0006325]	Cul4-RING E3 ubiquitin ligase complex [GO:0080008];cytosol [GO:0005829];nucleus [GO:0005634]		14	0	41.851	138	14.7	15.2	17.3	23.4	O22468	O22468	1145	MSI2	WD-40 repeat-containing protein MSI2
278712062835693	277284526824951	278659076690674	281549434661865	anther wall tapetum cell differentiation [GO:0048657];brassinosteroid homeostasis [GO:0010268];brassinosteroid mediated signaling pathway [GO:0009742];detection of brassinosteroid stimulus [GO:0009729];hormone-mediated signaling pathway [GO:0009755];leaf development [GO:0048366];microtubule bundle formation [GO:0001578];negative regulation of cell death [GO:0060548];pollen exine formation [GO:001…	endosome [GO:0005768];endosome membrane [GO:0010008];integral component of membrane [GO:0016021];plasma membrane [GO:0005886]	ATP binding [GO:0005524];identical protein binding [GO:0042802];protein heterodimerization activity [GO:0046982];protein homodimerization activity [GO:0042803];protein kinase activity [GO:0004672];protein serine/threonine kinase activity [GO:0004674];steroid binding [GO:0005496];transmembrane receptor protein tyrosine kinase activity [GO:0004714]	4	0.0018549	2.2324	21	1.8	1.2	1.8	1.8	O22476	O22476	1147	BRI1	Protein BRASSINOSTEROID INSENSITIVE 1
258801002502441	265633125305176	263203773498535	259178657531738	chloroplast organization [GO:0009658]	cytosol [GO:0005829]	ATP binding [GO:0005524];protein kinase activity [GO:0004672];protein serine/threonine kinase activity [GO:0004674];protein serine/threonine/tyrosine kinase activity [GO:0004712]	17	0	34.219	87	5.5	13.6	9.2	9.3	O22558	O22558	1148	STY8	Serine/threonine-protein kinase STY8
313133277893066	31286865234375	313085613250732	313693733215332	cell differentiation [GO:0030154];chromatin organization [GO:0006325];DNA repair [GO:0006281];flower development [GO:0009908];response to UV-B [GO:0010224]	Cul4-RING E3 ubiquitin ligase complex [GO:0080008];cytoplasm [GO:0005737];cytosol [GO:0005829];mitochondrion [GO:0005739];nucleolus [GO:0005730];nucleus [GO:0005634]	metal ion binding [GO:0046872]	41	0	323.31	650	60.7	63.9	51.5	61.7	O22607	O22607	1149	MSI4	WD-40 repeat-containing protein MSI4
279342708587646	276274929046631	285211067199707	286442680358887	photosystem II repair [GO:0010206];protein catabolic process [GO:0030163]	chloroplast [GO:0009507];chloroplast thylakoid [GO:0009534];chloroplast thylakoid membrane [GO:0009535];cytosol [GO:0005829];nucleus [GO:0005634];thylakoid [GO:0009579];thylakoid lumen [GO:0031977]	identical protein binding [GO:0042802];serine-type endopeptidase activity [GO:0004252];serine-type peptidase activity [GO:0008236]	16	0	57.619	110	26.4	27.8	34.6	33.5	O22609	O22609	1150	DEGP1	Protease Do-like 1, chloroplastic
275739097595215	27698694229126	275786666870117	275429630279541	cysteine biosynthetic process from serine [GO:0006535];photosynthesis [GO:0015979];photosynthetic acclimation [GO:0009643];regulation of hydrogen peroxide metabolic process [GO:0010310];regulation of superoxide metabolic process [GO:0090322]	chloroplast [GO:0009507];chloroplast thylakoid lumen [GO:0009543];cytoplasm [GO:0005737];thylakoid lumen [GO:0031977]	cysteine synthase activity [GO:0004124];pyridoxal phosphate binding [GO:0030170]	12	0	45.156	90	20.3	18.6	21	23.5	O22682	O22682	1151	CS26	S-sulfo-L-cysteine synthase (O-acetyl-L-serine-dependent), chloroplastic
30004638671875	299377536773682	300559482574463	299615459442139	cyanate catabolic process [GO:0009440];response to salt stress [GO:0009651]	cytosol [GO:0005829]	cyanate hydratase activity [GO:0008824];DNA binding [GO:0003677];identical protein binding [GO:0042802]	14	0	282.35	204	54.8	66.7	44	55.4	O22683	O22683	1152	CYN	Cyanate hydratase
262429256439209	266364402770996	268782997131348	264949398040771		chloroplast envelope [GO:0009941];plasma membrane [GO:0005886]	oxidoreductase activity [GO:0016491]	18	0	28.035	34	28.7	29.3	35.4	29.3	O22707	O22707	1153	At1g60690	Probable aldo-keto reductase 3
247628879547119	252403087615967	245925769805908	NaN		mitochondrion [GO:0005739]		11	0	9.2641	22	1.8	1.8	1.8	0	O22714	O22714	1154	At1g60770	Pentatricopeptide repeat-containing protein At1g60770
251102027893066	260126094818115	254132232666016	255888080596924	intracellular protein transport [GO:0006886];vesicle-mediated transport [GO:0016192]	clathrin adaptor complex [GO:0030131];clathrin-coated vesicle membrane [GO:0030665];cytoplasmic vesicle [GO:0031410];cytosol [GO:0005829];early endosome membrane [GO:0031901];Golgi apparatus [GO:0005794];intracellular membrane-bounded organelle [GO:0043231];nucleus [GO:0005634]		28	0	186.95	174	1.4	1.4	1.4	6.1	O22715;Q9SAC9	O22715	1155	AP1M2	AP-1 complex subunit mu-2
271380939483643	264499931335449	263238868713379	26269868850708	auxin biosynthetic process [GO:0009851];tryptophan biosynthetic process [GO:0000162]	chloroplast [GO:0009507];cytoplasm [GO:0005737];cytosol [GO:0005829]	indole-3-glycerol-phosphate lyase activity [GO:0033984];tryptophan synthase activity [GO:0004834]	8	0	19.509	31	22.2	33.1	24.4	20.7	O22765	O22765	1157	TRPA1	Tryptophan synthase alpha chain
267785625457764	267993412017822	26737377166748	268090667724609	mitochondrial electron transport, NADH to ubiquinone [GO:0006120];respiratory electron transport chain [GO:0022904];response to oxidative stress [GO:0006979]	cytosol [GO:0005829];mitochondrial respiratory chain complex I [GO:0005747];mitochondrion [GO:0005739]	2 iron, 2 sulfur cluster binding [GO:0051537];NADH dehydrogenase (ubiquinone) activity [GO:0008137];zinc ion binding [GO:0008270]	9	0	34.92	94	11.8	16.9	16.5	16.5	O22769	O22769	1159	At4g02580	NADH dehydrogenase [ubiquinone] flavoprotein 2, mitochondrial
255522422790527	255804653167725	256097259521484	256035404205322	photosystem II repair [GO:0010206]	chloroplast [GO:0009507];chloroplast envelope [GO:0009941];chloroplast stroma [GO:0009570];chloroplast thylakoid [GO:0009534];chloroplast thylakoid lumen [GO:0009543];chloroplast thylakoid membrane [GO:0009535];cytosol [GO:0005829];thylakoid [GO:0009579];thylakoid lumen [GO:0031977]		3	0	17.897	27	19.9	11.1	19.9	19.9	O22773	O22773	1160	At4g02530	Thylakoid lumenal 16.5 kDa protein, chloroplastic
24348611831665	243683967590332	245840549468994	239175243377686	plasmodesmata-mediated intercellular transport [GO:0010497];transport of virus in multicellular host [GO:0046739]	integral component of membrane [GO:0016021];plasma membrane [GO:0005886];plasmodesma [GO:0009506]		2	0	15.287	5	8.2	8.2	3.6	8.2	O22784	O22784	1161	PDLP3	Plasmodesmata-located protein 3
292641429901123	29341236114502	292539482116699	292522792816162	defense response to bacterium [GO:0042742];DNA repair [GO:0006281];generation of catalytic spliceosome for first transesterification step [GO:0000349];innate immune response [GO:0045087];protein K63-linked ubiquitination [GO:0070534]	catalytic step 2 spliceosome [GO:0071013];cell wall [GO:0005618];Cul4-RING E3 ubiquitin ligase complex [GO:0080008];endoplasmic reticulum [GO:0005783];nucleus [GO:0005634];Prp19 complex [GO:0000974];U2-type catalytic step 1 spliceosome [GO:0071006]	ubiquitin protein ligase activity [GO:0061630];ubiquitin-protein transferase activity [GO:0004842]	30	0	323.31	292	35.4	44	30.7	27.2	O22785	O22785	1162	PRP19B	Pre-mRNA-processing factor 19 homolog 2
24708251953125	25564884185791	253346996307373	255365886688232	regulation of RNA metabolic process [GO:0051252]	endoplasmic reticulum [GO:0005783];nucleus [GO:0005634];ribonucleoprotein complex [GO:1990904]	mRNA binding [GO:0003729];RNA binding [GO:0003723]	11	0	68.336	67	8.7	8.7	5	5	O22791	O22791	1163	At2g33410	Putative RNA-binding protein
239064655303955	241819229125977	238153839111328	238723926544189	cytidine to uridine editing [GO:0016554];endonucleolytic cleavage of tetracistronic rRNA transcript (SSU-rRNA, LSU-rRNA, 4.5S-rRNA, 5S-rRNA) [GO:0002103];mitochondrial mRNA modification [GO:0080156];mRNA processing [GO:0006397];plastid organization [GO:0009657]	chloroplast [GO:0009507];endoplasmic reticulum [GO:0005783];mitochondrion [GO:0005739]	protein dimerization activity [GO:0046983];protein homodimerization activity [GO:0042803]	4	0	13.939	10	15.5	15.5	8.7	8.7	O22793	O22793	1164	MORF2	Multiple organellar RNA editing factor 2, chloroplastic
265405101776123	261443710327148	262121543884277	261446056365967	ceramide transport [GO:0035627];intermembrane lipid transfer [GO:0120009]	cytosol [GO:0005829];membrane [GO:0016020];plasma membrane [GO:0005886]	ceramide 1-phosphate binding [GO:1902387];ceramide 1-phosphate transfer activity [GO:1902388];lipid binding [GO:0008289]	17	0	76.951	93	26.7	37.1	8.4	29.2	O22797	O22797	1165	GLTP1	Glycolipid transfer protein 1
291140365600586	292436122894287	296191539764404	294651126861572	cellular response to hypoxia [GO:0071456];response to abscisic acid [GO:0009737];response to cadmium ion [GO:0046686];response to heat [GO:0009408];response to water deprivation [GO:0009414]		oxidoreductase activity [GO:0016491];oxidoreductase activity, acting on the CH-OH group of donors, NAD or NADP as acceptor [GO:0016616]	18	0	81.043	219	29.9	33	21.2	20.9	O22809	O22809	1166	CRL1	NAD(P)-binding Rossmann-fold superfamily protein
274056797027588	271592330932617	271476345062256	269492683410645			oxidoreductase activity [GO:0016491];oxidoreductase activity, acting on the CH-OH group of donors, NAD or NADP as acceptor [GO:0016616]	16	0	14.465	58	34	37.1	22.7	28	O22810	O22810	1167	CRL2	At2g33600
287227306365967	287990951538086	287117481231689	288684711456299	benzoate metabolic process [GO:0018874];para-aminobenzoic acid metabolic process [GO:0046482];positive regulation of seed germination [GO:0010030];salicylic acid metabolic process [GO:0009696]	cytosol [GO:0005829];intracellular membrane-bounded organelle [GO:0043231]	benzoic acid glucosyltransferase activity [GO:0052641];nicotinate-O-glucosyltransferase activity [GO:0090704];quercetin 3-O-glucosyltransferase activity [GO:0080043];quercetin 7-O-glucosyltransferase activity [GO:0080044];salicylic acid glucosyltransferase (ester-forming) activity [GO:0052639];salicylic acid glucosyltransferase (glucoside-forming) activity [GO:0052640];UDP-glucose:4-aminobenzoate…	24	0	323.31	278	31	26.9	29	27.8	O22822	O22822	1169	UGT74F2	UDP-glycosyltransferase 74F2
265345268249512	265173416137695	267676181793213	271654758453369	maturation of SSU-rRNA [GO:0030490];mRNA splicing, via spliceosome [GO:0000398]	nucleolus [GO:0005730];P-body [GO:0000932];small nucleolar ribonucleoprotein complex [GO:0005732];spliceosomal complex [GO:0005681];U4/U6 x U5 tri-snRNP complex [GO:0046540];U6 snRNP [GO:0005688]	RNA binding [GO:0003723]	6	0	10.398	42	41.8	45.1	20.9	20.9	O22823	O22823	1170	LSM6B	Sm-like protein LSM36B
282342987060547	285098285675049	28414981842041	286083011627197	Mo-molybdopterin cofactor biosynthetic process [GO:0006777]	cytosol [GO:0005829];molybdopterin synthase complex [GO:0019008]	molybdopterin synthase activity [GO:0030366]	13	0	50.886	151	32.8	47.5	32.3	52.5	O22827	O22827	1172	MOCS2	Molybdopterin synthase catalytic subunit
293728313446045	29377368927002	294636325836182	295005893707275	defense response [GO:0006952];fatty acid biosynthetic process [GO:0006633];fatty acid metabolic process [GO:0006631]	chloroplast stroma [GO:0009570]	acyl-[acyl-carrier-protein] desaturase activity [GO:0045300];metal ion binding [GO:0046872];stearoyl-[acp] desaturase activity [GO:0102786];stearoyl-CoA 9-desaturase activity [GO:0004768]	25	0	121.5	189	45.4	43.6	49.4	49.4	O22832;Q84VY3	O22832	1173	FAB2	Stearoyl-[acyl-carrier-protein] 9-desaturase 7, chloroplastic
261568431854248	264466857910156	266408596038818	267239036560059	cell wall macromolecule catabolic process [GO:0016998];chitin catabolic process [GO:0006032];defense response [GO:0006952];polysaccharide catabolic process [GO:0000272]	apoplast [GO:0048046];secretory vesicle [GO:0099503]	chitin binding [GO:0008061];chitinase activity [GO:0004568]	7	0	102.35	40	15.2	5.7	20.1	13.8	O22841	O22841	1174	At2g43620	Endochitinase At2g43620
256508617401123	196881828308105	255657558441162	NaN	cell wall macromolecule catabolic process [GO:0016998];chitin catabolic process [GO:0006032];defense response [GO:0006952];polysaccharide catabolic process [GO:0000272]	plasma membrane [GO:0005886]	chitin binding [GO:0008061];chitinase activity [GO:0004568]	16	0	67.746	106	3.2	9.6	3.2	0	O22842	O22842	1175	At2g43610	Endochitinase At2g43610
28173885345459	275694255828857	27126916885376	281748371124268	plant-type cell wall organization [GO:0009664];syncytium formation [GO:0006949]	cell wall [GO:0005618];extracellular region [GO:0005576];membrane [GO:0016020]		3	0	16.361	26	12.6	9.1	9.1	12.6	O22874	O22874	1179	EXPA8	Expansin-A8
328049736022949	328157005310059	327856178283691	327024612426758	chlorophyll biosynthetic process [GO:0015995];protoporphyrinogen IX biosynthetic process [GO:0006782]	chloroplast [GO:0009507];chloroplast envelope [GO:0009941];chloroplast stroma [GO:0009570];Golgi apparatus [GO:0005794]	uroporphyrinogen decarboxylase activity [GO:0004853]	34	0	323.31	658	68.5	68.5	68.5	66	O22886	O22886	1180	HEME2	Uroporphyrinogen decarboxylase 2, chloroplastic
250429763793945	247011280059814	255347499847412	254610137939453	mRNA processing [GO:0006397];RNA splicing [GO:0008380]	chloroplast envelope [GO:0009941];spliceosomal complex [GO:0005681]	ATP binding [GO:0005524];RNA binding [GO:0003723];RNA helicase activity [GO:0003724]	29	0	21.472	20	10.2	10	12.1	13	O22899	O22899	1182	At2g47250	Probable pre-mRNA-splicing factor ATP-dependent RNA helicase DEAH3
269832668304443	266061134338379	267813167572021	267961254119873		nucleus [GO:0005634]	ATP binding [GO:0005524];RNA binding [GO:0003723];RNA helicase activity [GO:0003724]	13	0	12.002	59	8.9	12.4	11.3	10.9	O22907	O22907	1183	RH24	DEAD-box ATP-dependent RNA helicase 24
NaN	249930419921875	254448699951172	251640377044678	negative regulation of reductive pentose-phosphate cycle [GO:0080153];reductive pentose-phosphate cycle [GO:0019253];response to sucrose [GO:0009744]	chloroplast [GO:0009507];chloroplast envelope [GO:0009941];chloroplast stroma [GO:0009570];cytosol [GO:0005829];protein-containing complex [GO:0032991]	copper ion binding [GO:0005507];nickel cation binding [GO:0016151]	2	0	19.487	13	0	31.5	24.2	7.3	O22914	O22914	1184	CP12-1	Calvin cycle protein CP12-1, chloroplastic
26707935333252	268553123474121	268486423492432	267995891571045	cis assembly of pre-catalytic spliceosome [GO:0000354];mRNA splicing, via spliceosome [GO:0000398]	Cajal body [GO:0015030];cytoplasm [GO:0005737];nucleoplasm [GO:0005654];spliceosomal complex [GO:0005681];U2 snRNP [GO:0005686]	RNA binding [GO:0003723]	6	0	16.743	45	15.5	15.5	12.1	15.5	O22922	O22922	1185	U2B''	U2 small nuclear ribonucleoprotein B''
287527694702148	288043670654297	281181774139404	285360851287842	peptide catabolic process [GO:0043171];proteolysis involved in cellular protein catabolic process [GO:0051603]	cytosol [GO:0005829];mitochondrion [GO:0005739];peroxisome [GO:0005777]	metal ion binding [GO:0046872];metalloendopeptidase activity [GO:0004222]	57	0	286.2	413	17.6	19.8	10	15.7	O22941;A0A1I9LPB3	O22941	1187	PXM16	Insulin-degrading enzyme-like 1, peroxisomal
247535343170166	242627010345459	242008266448975	237640533447266	cellular protein modification process [GO:0006464];defense response [GO:0006952];positive regulation of camalexin biosynthetic process [GO:1901183]	cytosol [GO:0005829];nucleus [GO:0005634]	protein-N-terminal asparagine amidohydrolase activity [GO:0008418];protein-N-terminal glutamine amidohydrolase activity [GO:0070773]	3	0	3.2061	4	11.3	17.6	7.2	11.3	O22944	O22944	1188	NTAQ1	Protein N-terminal glutamine amidohydrolase
295935249328613	296196956634521	294825458526611	296337413787842	regulation of programmed cell death [GO:0043067]	cytosol [GO:0005829];endoplasmic reticulum [GO:0005783];nucleus [GO:0005634];plasmodesma [GO:0009506]	mRNA binding [GO:0003729];RNA binding [GO:0003723]	38	0	314.62	363	36.2	37.1	31.5	38.5	O22957	O22957	1189	At2g34040	Apoptosis inhibitory protein 5 (API5)
NaN	NaN	232245121002197	244096336364746	mitochondrial proton-transporting ATP synthase complex assembly [GO:0033615]	mitochondrion [GO:0005739]		4	0	9.1138	25	0	0	3.2	7.3	O22958	O22958	1190	At2g34050	ATP synthase F1 complex assembly factor
259378662109375	266477355957031	262768936157227	263876190185547		Golgi apparatus [GO:0005794];integral component of membrane [GO:0016021]	O-acetyltransferase activity [GO:0016413]	8	0	50.464	49	12.7	6.5	14.8	14.8	O22960	O22960	1191	TBL37	Protein trichome birefringence-like 37
254885196685791	NaN	252280254364014	247200450897217	rRNA processing [GO:0006364]	cytosol [GO:0005829];endoplasmic reticulum [GO:0005783];nucleus [GO:0005634]	nucleic acid binding [GO:0003676]	11	0	10.815	5	40	31.5	36.9	36.2	O22969	O22969	1192	At2g34160	Uncharacterized protein At2g34160
278974685668945	279005241394043	279375305175781	281595211029053		nucleus [GO:0005634]		9	0	33.53	41	12.1	12.1	12.1	12.1	O22978	O22978	1194	T19F6.7	T19F6.7 protein
297360553741455	295150833129883	295956077575684	296175270080566	defense response [GO:0006952]	anchored component of membrane [GO:0031225];anchored component of plasma membrane [GO:0046658];mitochondrion [GO:0005739];plasma membrane [GO:0005886];plasmodesma [GO:0009506]	chitin binding [GO:0008061]	12	0	67.24	106	28.3	22.6	24.3	24.3	O23006	O23006	1195	LYM2	LysM domain-containing GPI-anchored protein 2
29396053314209	294754123687744	295272178649902	295364933013916	oxidation-reduction process [GO:0055114];potassium ion transport [GO:0006813];regulation of ion transmembrane transport [GO:0034765]	extracellular region [GO:0005576];plasma membrane [GO:0005886];plasmodesma [GO:0009506]	aldo-keto reductase (NADP) activity [GO:0004033];voltage-gated ion channel activity [GO:0005244]	25	0	88.432	225	44.2	48.8	46.6	48.8	O23016	O23016	1196	KAB1	Probable voltage-gated potassium channel subunit beta
299256381988525	300133190155029	298386688232422	29866527557373	protein modification by small protein conjugation [GO:0032446];protein ufmylation [GO:0071569]	cytoplasm [GO:0005737];cytosol [GO:0005829]	ATP binding [GO:0005524];metal ion binding [GO:0046872];UFM1 activating enzyme activity [GO:0071566]	24	0	323.31	294	49.9	45.9	41.8	45	O23034	O23034	1197	At1g05350	Ubiquitin-like modifier-activating enzyme 5
260420570373535	266073837280273	260146961212158	266240787506104	hydrogen peroxide catabolic process [GO:0042744];hyperosmotic salinity response [GO:0042538];response to cold [GO:0009409];response to desiccation [GO:0009269];response to oxidative stress [GO:0006979]	endoplasmic reticulum [GO:0005783];extracellular region [GO:0005576];plant-type cell wall [GO:0009505];plasmodesma [GO:0009506]	heme binding [GO:0020037];metal ion binding [GO:0046872];peroxidase activity [GO:0004601]	13	0	240.17	81	18.1	19.3	5.5	23	O23044;Q43872;P0DI10	O23044	1198	PER3	Peroxidase 3
278882637023926	282410449981689	283283023834229	283751754760742	embryo development ending in seed dormancy [GO:0009793];translation [GO:0006412]	chloroplast [GO:0009507];chloroplast envelope [GO:0009941];chloroplast stroma [GO:0009570];extracellular region [GO:0005576];ribosome [GO:0005840]	rRNA binding [GO:0019843];structural constituent of ribosome [GO:0003735]	13	0	53.646	119	27.8	38.1	31.4	37.2	O23049	O23049	1199	RPL6	50S ribosomal protein L6, chloroplastic
250542831420898	255183925628662	25328857421875	2461745262146	regulation of cell cycle [GO:0051726]	nucleus [GO:0005634]		7	0	10.28	12	9.2	5	5	7	O23126	O23126	1200	At1g22970	At1g22970/F19G10_8
279666423797607	276991577148438	276887245178223	276560821533203	gibberellic acid homeostasis [GO:0010336];mitochondrial electron transport, cytochrome c to oxygen [GO:0006123];mitochondrial electron transport, ubiquinol to cytochrome c [GO:0006122]	cytosol [GO:0005829];mitochondrial intermembrane space [GO:0005758];mitochondrion [GO:0005739];nucleus [GO:0005634];respirasome [GO:0070469];vacuolar membrane [GO:0005774]	copper ion binding [GO:0005507];electron transfer activity [GO:0009055];heme binding [GO:0020037]	8	0	23.85	79	52.6	52.6	52.6	42.1	O23138	O23138	1201	CYTC-1	Cytochrome c-1
27202657699585	252689933776855	257730884552002	240974807739258	endocytosis [GO:0006897];intracellular protein transport [GO:0006886];vesicle-mediated transport [GO:0016192]	clathrin adaptor complex [GO:0030131];clathrin-coated pit [GO:0005905];cytoplasmic vesicle [GO:0031410];Golgi apparatus [GO:0005794];intracellular membrane-bounded organelle [GO:0043231]	lipid binding [GO:0008289]	25	0	52.875	71	3.9	6.2	6.2	8.4	O23140	O23140	1202	AP2M	AP-2 complex subunit mu
29579008102417	296679706573486	297652339935303	296326675415039	regulation of proton transport [GO:0010155]	cytosol [GO:0005829];endoplasmic reticulum [GO:0005783];endoplasmic reticulum membrane [GO:0005789];integral component of membrane [GO:0016021];plasma membrane [GO:0005886];plasmodesma [GO:0009506]	mRNA binding [GO:0003729]	41	0	100.32	289	44.6	36.3	39.1	36.6	O23144	O23144	1204	PPI1	Proton pump-interactor 1
269225234985352	269386520385742	271569213867188	267719058990479		cytosol [GO:0005829];vacuolar membrane [GO:0005774]		17	0	116.69	91	1.2	1.2	1.2	1.2	O23167	O23167	1205	C7A10.170	At4g37190
256198616027832	284158267974854	249368782043457	NaN	defense response [GO:0006952];lateral root formation [GO:0010311];lipid catabolic process [GO:0016042]	cytoplasm [GO:0005737]	acylglycerol lipase activity [GO:0047372];phospholipase activity [GO:0004620]	24	0	166.03	132	5.3	2.9	14	5.1	O23179	O23179	1207	PLP1	Patatin-like protein 1
25004789352417	252415809631348	258295593261719	252573509216309	oxidation-reduction process [GO:0055114]	plasma membrane [GO:0005886]	FMN binding [GO:0010181];NAD(P)H dehydrogenase (quinone) activity [GO:0003955]	5	0	25.462	38	5.9	5.9	13.9	5.9	O23207	O23207	1209	At4g36750	Probable NAD(P)H dehydrogenase (quinone) FQR1-like 2
250104351043701	247010765075684	246816387176514	24652229309082	defense response to bacterium [GO:0042742];mRNA splicing, via spliceosome [GO:0000398]	commitment complex [GO:0000243];nuclear speck [GO:0016607];nucleus [GO:0005634];U2AF [GO:0089701];U2-type prespliceosome [GO:0071004]	poly-pyrimidine tract binding [GO:0008187];pre-mRNA 3'-splice site binding [GO:0030628]	10	0	59.436	41	3	1.7	1.7	1.7	O23212	O23212	1210	U2AF65A	Splicing factor U2af large subunit A
195151462554932	18896167755127	195062408447266	183990364074707	hydrogen peroxide catabolic process [GO:0042744];response to oxidative stress [GO:0006979]	cell wall [GO:0005618];extracellular region [GO:0005576]	heme binding [GO:0020037];metal ion binding [GO:0046872];peroxidase activity [GO:0004601]	12	0	59.351	47	9.1	4.5	4.5	9.1	O23237;Q9SLH7	O23237	1211	PER49	Peroxidase 49
285901012420654	287905139923096	2869504737854	28678352355957	nitrogen compound metabolic process [GO:0006807];photorespiration [GO:0009853]	mitochondrion [GO:0005739];plasma membrane [GO:0005886]	(R)-2-hydroxyglutarate dehydrogenase activity [GO:0051990];2-hydroxyglutarate dehydrogenase activity [GO:0047545];FAD binding [GO:0071949]	21	0	73.937	165	22	18.8	32	14	O23240	O23240	1212	D2HGDH	D-2-hydroxyglutarate dehydrogenase, mitochondrial
265849151611328	25802770614624	262307224273682	254336128234863	response to virus [GO:0009615]	cytoplasm [GO:0005737];cytoplasmic stress granule [GO:0010494];cytosol [GO:0005829];eukaryotic translation initiation factor 4F complex [GO:0016281];mRNA cap binding complex [GO:0005845];nucleolus [GO:0005730];nucleus [GO:0005634];P-body [GO:0000932]	RNA 7-methylguanosine cap binding [GO:0000340];translation initiation factor activity [GO:0003743]	7	0	10.855	43	17.4	20.4	10.2	14.9	O23252	O23252	1213	EIF4E1	Eukaryotic translation initiation factor 4E-1
331217651367188	331655616760254	331407318115234	331771354675293	cellular response to tetrahydrofolate [GO:1904482];circadian rhythm [GO:0007623];folic acid metabolic process [GO:0046655];glycine biosynthetic process from serine [GO:0019264];glycine metabolic process [GO:0006544];L-serine catabolic process [GO:0006565];one-carbon metabolic process [GO:0006730];response to cadmium ion [GO:0046686];tetrahydrofolate interconversion [GO:0035999];tetrahydrofolate m…	cytosol [GO:0005829];plasma membrane [GO:0005886];plasmodesma [GO:0009506]	amino acid binding [GO:0016597];cobalt ion binding [GO:0050897];glycine hydroxymethyltransferase activity [GO:0004372];pyridoxal phosphate binding [GO:0030170];serine binding [GO:0070905];zinc ion binding [GO:0008270]	68	0	323.31	1350	79.6	85.8	94.5	81.1	O23254	O23254	1214	SHM4	Serine hydroxymethyltransferase 4
346843147277832	346908836364746	346601791381836	347174301147461	DNA methylation-dependent heterochromatin assembly [GO:0006346];embryo development ending in seed dormancy [GO:0009793];one-carbon metabolic process [GO:0006730];posttranscriptional gene silencing [GO:0016441];S-adenosylmethionine cycle [GO:0033353]	cytosol [GO:0005829];plasma membrane [GO:0005886];plasmodesma [GO:0009506];vacuolar membrane [GO:0005774];vacuole [GO:0005773]	adenosylhomocysteinase activity [GO:0004013];copper ion binding [GO:0005507]	71	0	323.31	2264	82.1	76.7	76.7	77.3	O23255	O23255	1215	SAHH1	Adenosylhomocysteinase 1
314094276428223	314627552032471	314413433074951	314572849273682	cellular response to selenium ion [GO:0071291];response to cadmium ion [GO:0046686];response to hydrogen peroxide [GO:0042542];sulfate assimilation [GO:0000103]	cytosol [GO:0005829];plasmodesma [GO:0009506]	selenium binding [GO:0008430]	47	0	323.31	642	66.1	67.1	77.8	75.3	O23264	O23264	1216	SBP1	Selenium-binding protein 1
NaN	247536354064941	249052715301514	NaN	defense response [GO:0006952]	cytosol [GO:0005829]		19	0	68.416	81	23.8	24.5	24.5	13.9	O23267	O23267	1217	dl3070w	AT4g14060/dl3070w
183959445953369	183854064941406	182192058563232	184103031158447	translation [GO:0006412]	cytosol [GO:0005829];cytosolic large ribosomal subunit [GO:0022625]	structural constituent of ribosome [GO:0003735]	20	0	74.046	120	8.6	8.6	8.6	8.6	O23290	O23290	1218	RPL36AA	60S ribosomal protein L36a
255379219055176	252415447235107	244203414916992	246909370422363	fatty acid beta-oxidation [GO:0006635];fatty acid catabolic process [GO:0009062];indolebutyric acid metabolic process [GO:0080024];response to indolebutyric acid [GO:0080026];root hair elongation [GO:0048767]	peroxisome [GO:0005777]	dodecenoyl-CoA delta-isomerase activity [GO:0004165];enoyl-CoA hydratase activity [GO:0004300]	6	0	4.419	23	7.9	3.3	4.6	4.6	O23299	O23299	1219	ECI2	Enoyl-CoA delta isomerase 2, peroxisomal
278559646606445	275258922576904	275050640106201	27577299118042	positive regulation of transcription, DNA-templated [GO:0045893]	cytosol [GO:0005829];nucleus [GO:0005634]	DNA-binding transcription factor activity [GO:0003700];protein heterodimerization activity [GO:0046982];sequence-specific DNA binding [GO:0043565]	7	0	11.64	46	28.6	26.7	28.6	22.4	O23310	O23310	1221	NFYB3	Nuclear transcription factor Y subunit B-3
258805904388428	261069736480713	259783000946045	256244697570801	response to high light intensity [GO:0009644]	chloroplast [GO:0009507]	2 iron, 2 sulfur cluster binding [GO:0051537];electron transfer activity [GO:0009055];metal ion binding [GO:0046872]	4	0	95.109	12	24	24	24	20.8	O23344	O23344	1222	FDC1	Ferredoxin C 1, chloroplastic
259396381378174	259538249969482	255357875823975	256084842681885	carotenoid biosynthetic process [GO:0016117];oxidation-reduction process [GO:0055114]	chloroplast [GO:0009507];chloroplast envelope [GO:0009941];chloroplast membrane [GO:0031969];chloroplast stroma [GO:0009570];cytosol [GO:0005829]	heme binding [GO:0020037];iron ion binding [GO:0005506];monooxygenase activity [GO:0004497];oxidoreductase activity, acting on paired donors, with incorporation or reduction of molecular oxygen [GO:0016705]	7	0	6.6711	12	4.7	2.1	4.7	6.7	O23365	O23365	1223	CYP97B3	Cytochrome P450 97B3, chloroplastic
280460910797119	300605945587158	301232452392578	296427707672119			transferase activity, transferring acyl groups other than amino-acyl groups [GO:0016747]	41	0	323.31	353	5.2	2.7	2.7	2.7	O23392	O23392	1224	dl3740c	HSR201-like protein
266196098327637	267758026123047	271309471130371	267141075134277		intracellular membrane-bounded organelle [GO:0043231]	cinnamate beta-D-glucosyltransferase activity [GO:0050412];quercetin 3-O-glucosyltransferase activity [GO:0080043];quercetin 7-O-glucosyltransferase activity [GO:0080044];sinapate 1-glucosyltransferase activity [GO:0050284];UDP-glycosyltransferase activity [GO:0008194]	9	0	10.855	60	8.6	14.4	18.8	14.4	O23401	O23401	1226	UGT84A3	UDP-glycosyltransferase 84A3
246267833709717	247330379486084	254518337249756	255166206359863		intracellular membrane-bounded organelle [GO:0043231]	cinnamate beta-D-glucosyltransferase activity [GO:0050412];quercetin 3-O-glucosyltransferase activity [GO:0080043];quercetin 7-O-glucosyltransferase activity [GO:0080044];sinapate 1-glucosyltransferase activity [GO:0050284];UDP-glycosyltransferase activity [GO:0008194]	11	0	57.879	69	4.6	4.6	6.1	4.6	O23402	O23402	1227	UGT84A4	UDP-glycosyltransferase 84A4
305298080444336	301252174377441	303083457946777	303049774169922	photosystem I assembly [GO:0048564]	chloroplast [GO:0009507];chloroplast stroma [GO:0009570];chloroplast thylakoid lumen [GO:0009543];chloroplast thylakoid membrane [GO:0009535];extrinsic component of membrane [GO:0019898];photosystem II oxygen evolving complex [GO:0009654];thylakoid [GO:0009579];thylakoid lumen [GO:0031977]	calcium ion binding [GO:0005509]	17	0	89.298	115	42.9	46.3	50.2	46.3	O23403	O23403	1228	PPD1	PsbP domain-containing protein 1, chloroplastic
343321151733398	345253105163574	343749008178711	34401782989502	photosynthesis [GO:0015979];pyruvate metabolic process [GO:0006090]	chloroplast [GO:0009507];chloroplast stroma [GO:0009570];cytosol [GO:0005829];nucleus [GO:0005634]	ATP binding [GO:0005524];kinase activity [GO:0016301];metal ion binding [GO:0046872];pyruvate, phosphate dikinase activity [GO:0050242]	114	0	323.31	1763	75.6	75.1	74.9	72.2	O23404	O23404	1229	PPDK	Pyruvate, phosphate dikinase 1, chloroplastic
271369228363037	276630229949951	271685390472412	267564640045166	response to toxic substance [GO:0009636]	intracellular membrane-bounded organelle [GO:0043231]	quercetin 3-O-glucosyltransferase activity [GO:0080043];quercetin 7-O-glucosyltransferase activity [GO:0080044];UDP-glycosyltransferase activity [GO:0008194]	22	0	170.24	165	16.9	20.9	8.6	11	O23406	O23406	1230	UGT75D1	UDP-glycosyltransferase 75D1
217648639678955	218962631225586	241835899353027	21751932144165	galactose metabolic process [GO:0006012]	cytosol [GO:0005829];integral component of membrane [GO:0016021];plasmodesma [GO:0009506]	ATP binding [GO:0005524];galactose binding [GO:0005534];L-arabinokinase activity [GO:0009702]	40	0	235.05	174	1	2.8	4.4	1.7	O23461	O23461	1231	ARA1	L-arabinokinase
257423973083496	253867969512939	254151592254639	NaN	cellular response to cold [GO:0070417];positive regulation of transcription by RNA polymerase II [GO:0045944];regulation of transcription, DNA-templated [GO:0006355];response to cold [GO:0009409]	nucleus [GO:0005634]	calmodulin binding [GO:0005516];DNA-binding transcription factor activity [GO:0003700];sequence-specific DNA binding [GO:0043565]	8	0	17.024	28	1.2	1.2	1.2	0	O23463	O23463	1232	CAMTA5	Calmodulin-binding transcription activator 5
250299797058105	NaN	249469051361084	245874347686768	chlorophyll a catabolic process [GO:0033310];demethylation [GO:0070988];jasmonic acid metabolic process [GO:0009694];leaf senescence [GO:0010150];salicylic acid metabolic process [GO:0009696]	cytosol [GO:0005829]	carboxylic ester hydrolase activity [GO:0052689];hydrolase activity [GO:0016787];hydrolase activity, acting on ester bonds [GO:0016788];methyl indole-3-acetate esterase activity [GO:0080030];methyl jasmonate esterase activity [GO:0080032];methyl salicylate esterase activity [GO:0080031];pheophoridase activity [GO:0035560];protein homodimerization activity [GO:0042803]	6	0	5.2085	7	3.1	0	3.1	2.7	O23512	O23512	1233	PPD	Probable pheophorbidase
241221828460693	235726528167725	231244106292725	NaN	sexual reproduction [GO:0019953]	extracellular region [GO:0005576]		3	0	5.3123	12	4	9.2	9.2	0	O23547	O23547	1235	EXLB1	Expansin-like B1
325774078369141	315047416687012	316544609069824	327245216369629	maltose biosynthetic process [GO:0000024];response to cold [GO:0009409];starch catabolic process [GO:0005983]	chloroplast stroma [GO:0009570];cytosol [GO:0005829]	amylopectin maltohydrolase activity [GO:0102229];beta-amylase activity [GO:0016161]	51	0	323.31	421	67.5	70.6	61.7	63	O23553	O23553	1236	BAM3	Beta-amylase 3, chloroplastic
285631103515625	28703125	286510601043701	287094821929932	carbohydrate metabolic process [GO:0005975];carboxylic acid metabolic process [GO:0019752];response to abscisic acid [GO:0009737]	cytosol [GO:0005829];plasma membrane [GO:0005886]	L-lactate dehydrogenase activity [GO:0004459]	17	0	61.23	177	17.8	32	41.6	26.1	O23569	O23569	1237	dl4665w	L-lactate dehydrogenase
282542171478271	280140895843506	294078483581543	291865978240967		chloroplast thylakoid lumen [GO:0009543];mitochondrion [GO:0005739];thylakoid [GO:0009579];thylakoid lumen [GO:0031977]	endopeptidase activity [GO:0004175];serine-type peptidase activity [GO:0008236]	17	0	81.731	99	19.8	23.1	25.8	28.2	O23614	O23614	1239	CTPA2	Carboxyl-terminal-processing peptidase 2, chloroplastic
333015747070313	33314868927002	332845764160156	33344799041748	diadenosine tetraphosphate biosynthetic process [GO:0015966];glycyl-tRNA aminoacylation [GO:0006426];mitochondrial glycyl-tRNA aminoacylation [GO:0070150];response to cadmium ion [GO:0046686]	chloroplast [GO:0009507];cytoplasm [GO:0005737];cytosol [GO:0005829];endosome [GO:0005768];Golgi apparatus [GO:0005794];mitochondrion [GO:0005739];nucleus [GO:0005634];trans-Golgi network [GO:0005802]	ATP binding [GO:0005524];glycine-tRNA ligase activity [GO:0004820];protein dimerization activity [GO:0046983];transferase activity [GO:0016740]	96	0	323.31	1647	72.3	66.8	70.2	70.4	O23627;Q9FXG2	O23627	1242	At1g29880	Glycine--tRNA ligase, mitochondrial 1
251426982879639	258389873504639	257286071777344	255234565734863	nucleosome assembly [GO:0006334]	chloroplast stroma [GO:0009570];chloroplast thylakoid [GO:0009534];cytosol [GO:0005829];nucleolus [GO:0005730];nucleosome [GO:0000786]	DNA binding [GO:0003677];protein heterodimerization activity [GO:0046982]	22	0	4.9846	30	66.7	73.3	79.3	80	O23629	O23629	1243	H2B	Histone H2B.6
292248096466064	293712539672852	292173633575439	29268030166626	amylopectin biosynthetic process [GO:0010021];carbohydrate metabolic process [GO:0005975];cellular response to fructose stimulus [GO:0071332];cellular response to glucose stimulus [GO:0071333];cellular response to light stimulus [GO:0071482];cellular response to sucrose stimulus [GO:0071329];glycogen biosynthetic process [GO:0005978];starch biosynthetic process [GO:0019252];starch metabolic proce…	amyloplast [GO:0009501];chloroplast [GO:0009507];chloroplast stroma [GO:0009570];cytoplasm [GO:0005737]	1,4-alpha-glucan branching enzyme activity (using a glucosylated glycogenin as primer for glycogen synthesis) [GO:0102752];1,4-alpha-glucan branching enzyme activity [GO:0003844];cation binding [GO:0043169];hydrolase activity, hydrolyzing O-glycosyl compounds [GO:0004553]	28	0	127.52	219	30.8	27.6	28.2	33.7	O23647	O23647	1244	SBE2.1	1,4-alpha-glucan-branching enzyme 2-1, chloroplastic/amyloplastic
27102294921875	26552095413208	268797016143799	266901912689209	homoserine biosynthetic process [GO:0009090];lysine biosynthetic process via diaminopimelate [GO:0009089];threonine biosynthetic process [GO:0009088]	chloroplast stroma [GO:0009570];cytoplasm [GO:0005737]	aspartate kinase activity [GO:0004072];ATP binding [GO:0005524]	14	0	35.4	66	10.1	8.1	6.8	8.8	O23653	O23653	1245	AK2	Aspartokinase 2, chloroplastic
328892860412598	328484916687012	328926010131836	329186553955078	ATP metabolic process [GO:0046034];Golgi organization [GO:0007030];pollen development [GO:0009555]	cell wall [GO:0005618];chloroplast [GO:0009507];chloroplast envelope [GO:0009941];cytosol [GO:0005829];Golgi apparatus [GO:0005794];mitochondrion [GO:0005739];plant-type vacuole [GO:0000325];plasma membrane [GO:0005886];plasmodesma [GO:0009506];proton-transporting V-type ATPase, V1 domain [GO:0033180];vacuolar membrane [GO:0005774];vacuole [GO:0005773]	ATP binding [GO:0005524];protease binding [GO:0002020];proton-transporting ATPase activity, rotational mechanism [GO:0046961]	82	0	323.31	1582	69.7	74.3	74.5	72.1	O23654	O23654	1246	VHA-A	V-type proton ATPase catalytic subunit A
220340595245361	225196304321289	227314224243164	NaN	intracellular protein transport [GO:0006886];Rab protein signal transduction [GO:0032482]	endomembrane system [GO:0012505];Golgi apparatus [GO:0005794];nucleus [GO:0005634];plasma membrane [GO:0005886]	GTP binding [GO:0005525];GTPase activity [GO:0003924]	12	0	78.136	61	9	9	11.3	0	O23657;O49841	O23657	1247	RABC1	Ras-related protein RABC1
283444766998291	281611557006836	275723915100098	274882278442383		chloroplast [GO:0009507]	oxidoreductase activity [GO:0016491]	15	0	26.335	73	16.2	13.1	13.4	15.9	O23673	O23673	1248	At1g02020	Nitroreductase family protein
283499698638916	283315086364746	283247871398926	284214172363281	embryo development ending in seed dormancy [GO:0009793];mRNA processing [GO:0006397];mRNA transport [GO:0051028];nuclear-transcribed mRNA catabolic process, nonsense-mediated decay [GO:0000184];pollen tube guidance [GO:0010183];positive regulation of gene expression [GO:0010628];regulation of translation [GO:0006417];RNA splicing [GO:0008380]	exon-exon junction complex [GO:0035145];nuclear speck [GO:0016607];nucleolus [GO:0005730];nucleoplasm [GO:0005654];P-body [GO:0000932]	RNA binding [GO:0003723]	15	0	120.52	150	42	61.3	51.3	42	O23676	O23676	1249	MAGO	Protein mago nashi homolog
283681144714355	280367431640625	282090892791748	283119430541992		chloroplast [GO:0009507];chloroplast stroma [GO:0009570]	DNA-directed 5'-3' RNA polymerase activity [GO:0003899]	7	0	51.957	53	23.3	32	16.5	24.8	O23684	O23684	1250	At2g41950	At2g41950/T6D20.26
303827800750732	306395320892334	304103374481201	305219688415527	proteasomal protein catabolic process [GO:0010498];proteasomal ubiquitin-independent protein catabolic process [GO:0010499];proteasome-mediated ubiquitin-dependent protein catabolic process [GO:0043161];response to zinc ion [GO:0010043]	cytoplasm [GO:0005737];cytosol [GO:0005829];cytosolic ribosome [GO:0022626];nucleus [GO:0005634];proteasome complex [GO:0000502];proteasome core complex [GO:0005839];proteasome core complex, alpha-subunit complex [GO:0019773]	endopeptidase activity [GO:0004175];threonine-type endopeptidase activity [GO:0004298]	28	0	323.31	485	73.6	89.4	80.9	73.6	O23708	O23708	1252	PAB1	Proteasome subunit alpha type-2-A
290172538757324	291839027404785	289370536804199	29130578994751	proteasomal protein catabolic process [GO:0010498];proteasomal ubiquitin-independent protein catabolic process [GO:0010499];proteasome-mediated ubiquitin-dependent protein catabolic process [GO:0043161]	cytoplasm [GO:0005737];cytosol [GO:0005829];nucleus [GO:0005634];proteasome complex [GO:0000502];proteasome core complex [GO:0005839];proteasome core complex, beta-subunit complex [GO:0019774]	endopeptidase activity [GO:0004175];threonine-type endopeptidase activity [GO:0004298]	24	0	180.41	233	23.8	25.3	30	26	O23710	O23710	1253	PBB1	Proteasome subunit beta type-7-A
256026916503906	262195587158203	250428085327148	260255928039551	proteasomal protein catabolic process [GO:0010498];proteasomal ubiquitin-independent protein catabolic process [GO:0010499];proteasome-mediated ubiquitin-dependent protein catabolic process [GO:0043161]	cytoplasm [GO:0005737];cytosol [GO:0005829];nucleus [GO:0005634];plasma membrane [GO:0005886];plasmodesma [GO:0009506];proteasome complex [GO:0000502];proteasome core complex [GO:0005839];proteasome core complex, alpha-subunit complex [GO:0019773]	endopeptidase activity [GO:0004175];threonine-type endopeptidase activity [GO:0004298]	19	0	39.941	40	49.8	47.7	44	43.3	O23712	O23712	1254	PAF2	Proteasome subunit alpha type-1-B
251456546783447	NaN	NaN	255577735900879	proteasomal protein catabolic process [GO:0010498];proteasomal ubiquitin-independent protein catabolic process [GO:0010499];proteasome-mediated ubiquitin-dependent protein catabolic process [GO:0043161]	apoplast [GO:0048046];cytoplasm [GO:0005737];cytosol [GO:0005829];nucleus [GO:0005634];plasma membrane [GO:0005886];proteasome complex [GO:0000502];proteasome core complex [GO:0005839];proteasome core complex, beta-subunit complex [GO:0019774];secretory vesicle [GO:0099503];vacuolar membrane [GO:0005774];vacuole [GO:0005773]	endopeptidase activity [GO:0004175];threonine-type endopeptidase activity [GO:0004298]	13	0	6.4133	21	21.6	14.2	7.4	21.6	O23714	O23714	1255	PBD1	Proteasome subunit beta type-2-A
302046642303467	301715259552002	299969844818115	301190452575684	proteasomal protein catabolic process [GO:0010498];proteasomal ubiquitin-independent protein catabolic process [GO:0010499];proteasome-mediated ubiquitin-dependent protein catabolic process [GO:0043161];response to cadmium ion [GO:0046686];response to cold [GO:0009409]	apoplast [GO:0048046];cytoplasm [GO:0005737];cytosol [GO:0005829];nucleus [GO:0005634];peroxisome [GO:0005777];proteasome complex [GO:0000502];proteasome core complex [GO:0005839];proteasome core complex, alpha-subunit complex [GO:0019773];vacuolar membrane [GO:0005774];vacuole [GO:0005773]	endopeptidase activity [GO:0004175];threonine-type endopeptidase activity [GO:0004298]	32	0	310.18	393	63.1	65.5	58.2	61.8	O23715	O23715	1256	PAG1	Proteasome subunit alpha type-3
296989917755127	293928642272949	29383810043335	29356050491333	proteasomal protein catabolic process [GO:0010498];proteasomal ubiquitin-independent protein catabolic process [GO:0010499];proteasome-mediated ubiquitin-dependent protein catabolic process [GO:0043161]	cytoplasm [GO:0005737];nucleus [GO:0005634];proteasome core complex [GO:0005839];proteasome core complex, beta-subunit complex [GO:0019774]	endopeptidase activity [GO:0004175];threonine-type endopeptidase activity [GO:0004298]	21	0	323.31	258	61.3	68.2	50.7	68.2	O23717	O23717	1257	PBE1	Proteasome subunit beta type-5-A
30878547668457	307969150543213	306932029724121	307670669555664	isopentenyl diphosphate biosynthetic process, mevalonate pathway [GO:0019287];sterol biosynthetic process [GO:0016126]	cytosol [GO:0005829];peroxisome [GO:0005777]	ATP binding [GO:0005524];diphosphomevalonate decarboxylase activity [GO:0004163];identical protein binding [GO:0042802]	37	0	323.31	489	53.2	58.3	46.6	62.6	O23722	O23722	1258	MVD1	Diphosphomevalonate decarboxylase MVD1, peroxisomal
24807201385498	NaN	241841201782227	242042636871338	innate immune response [GO:0045087];leaf morphogenesis [GO:0009965];proteasome-mediated ubiquitin-dependent protein catabolic process [GO:0043161]	cytosol [GO:0005829];plasma membrane [GO:0005886];proteasome complex [GO:0000502];proteasome regulatory particle [GO:0005838]		19	0	86.775	128	7.8	0	8.8	3.6	O24412	O24412	1259	RPN8A	26S proteasome non-ATPase regulatory subunit 7 homolog A
303721256256104	303756523132324	303484725952148	305527954101563	cellular response to abscisic acid stimulus [GO:0071215];gibberellin mediated signaling pathway [GO:0010476];positive regulation of protein phosphorylation [GO:0001934];positive regulation of signal transduction [GO:0009967];regulation of translation [GO:0006417];rescue of stalled ribosome [GO:0072344];response to cadmium ion [GO:0046686];response to gibberellin [GO:0009739];response to glucose […	chloroplast [GO:0009507];cytoplasm [GO:0005737];cytosol [GO:0005829];cytosolic ribosome [GO:0022626];cytosolic small ribosomal subunit [GO:0022627];nucleus [GO:0005634];polysomal ribosome [GO:0042788]	enzyme binding [GO:0019899];MAP-kinase scaffold activity [GO:0005078];protein kinase C binding [GO:0005080];ribosome binding [GO:0043022];structural constituent of ribosome [GO:0003735]	48	0	323.31	648	44.3	57.5	56.6	60.9	O24456	O24456	1261	RACK1A	Receptor for activated C kinase 1A
307464714050293	309090633392334	308637828826904	309317092895508	acetyl-CoA biosynthetic process from pyruvate [GO:0006086];glycolytic process [GO:0006096]	chloroplast [GO:0009507];chloroplast envelope [GO:0009941];chloroplast stroma [GO:0009570];plastid [GO:0009536]	pyruvate dehydrogenase (acetyl-transferring) activity [GO:0004739]	55	0	323.31	704	68.7	65.9	61	63.1	O24457	O24457	1262	PDH-E1 ALPHA	Pyruvate dehydrogenase E1 component subunit alpha-3, chloroplastic
NaN	20080436706543	NaN	199351711273193	intracellular protein transport [GO:0006886];protein secretion [GO:0009306];Rab protein signal transduction [GO:0032482];regulation of exocytosis [GO:0017157];vesicle docking involved in exocytosis [GO:0006904]	cytosol [GO:0005829];endomembrane system [GO:0012505];Golgi membrane [GO:0000139];plasma membrane [GO:0005886]	GTP binding [GO:0005525];GTPase activity [GO:0003924]	9	0	5.2145	20	7.9	5.6	6	13.4	O24466	O24466	1263	RABE1A	Ras-related protein RABE1a
312353496551514	312945537567139	312841644287109	310726547241211	methylglyoxal catabolic process to D-lactate via S-lactoyl-glutathione [GO:0019243]	cytosol [GO:0005829];secretory vesicle [GO:0099503]	hydroxyacylglutathione hydrolase activity [GO:0004416];metal ion binding [GO:0046872]	27	0	323.31	440	78.3	85.3	85.3	85.3	O24496	O24496	1264	GLX2-2	Hydroxyacylglutathione hydrolase cytoplasmic
NaN	NaN	227566223144531	22348949432373	cellular response to hypoxia [GO:0071456];oxygen transport [GO:0015671];response to hypoxia [GO:0001666]	cell wall [GO:0005618];cytosol [GO:0005829];plasma membrane [GO:0005886];plasmodesma [GO:0009506]	heme binding [GO:0020037];metal ion binding [GO:0046872];oxygen binding [GO:0019825]	6	0	9.5619	34	0	0	5	5	O24520	O24520	1265	AHB1	Non-symbiotic hemoglobin 1
293890514373779	290567760467529	294913082122803	293665714263916	fatty acid metabolic process [GO:0006631];triglyceride biosynthetic process [GO:0019432]	cytosol [GO:0005829]	heme binding [GO:0020037];metal ion binding [GO:0046872];oxygen binding [GO:0019825];oxygen carrier activity [GO:0005344]	16	0	54.252	149	81.6	64.6	67.1	67.7	O24521	O24521	1266	AHB2	Non-symbiotic hemoglobin 2
249618167877197	248985996246338	255383358001709	245585327148438	cell wall macromolecule catabolic process [GO:0016998];chitin catabolic process [GO:0006032];defense response [GO:0006952];polysaccharide catabolic process [GO:0000272];response to fungus [GO:0009620]		chitin binding [GO:0008061];chitinase activity [GO:0004568]	3	0	3.0266	6	6.8	8.7	9.4	3	O24598	O24598	1267	At2g43580	Endochitinase At2g43580
295223617553711	296799125671387	276409282684326	297838172912598	cell wall macromolecule catabolic process [GO:0016998];chitin catabolic process [GO:0006032];leaf senescence [GO:0010150];polysaccharide catabolic process [GO:0000272];response to amitrole [GO:0072722];response to silver ion [GO:0010272];response to virus [GO:0009615];systemic acquired resistance [GO:0009627]	apoplast [GO:0048046];secretory vesicle [GO:0099503]	chitin binding [GO:0008061];chitinase activity [GO:0004568]	16	0	272.73	168	52	63.5	55.6	52.7	O24603	O24603	1268	CHI	Endochitinase CHI
281119251251221	279006958007813	278771286010742	278286266326904	proteasomal protein catabolic process [GO:0010498];proteasomal ubiquitin-independent protein catabolic process [GO:0010499];proteasome-mediated ubiquitin-dependent protein catabolic process [GO:0043161]	cytoplasm [GO:0005737];nucleus [GO:0005634];proteasome core complex [GO:0005839];proteasome core complex, beta-subunit complex [GO:0019774]	endopeptidase activity [GO:0004175];threonine-type endopeptidase activity [GO:0004298]	20	0	104.82	142	36.2	30.7	23.6	30.7	O24633	O24633	1270	PBD2	Proteasome subunit beta type-2-B
319938507080078	320337066650391	318859462738037	319560852050781	protein transport [GO:0015031];small GTPase mediated signal transduction [GO:0007264];vesicle-mediated transport [GO:0016192]	apoplast [GO:0048046];cytoplasm [GO:0005737];cytosol [GO:0005829];plasmodesma [GO:0009506]	GTPase activator activity [GO:0005096];Rab GDP-dissociation inhibitor activity [GO:0005093];Rab GTPase binding [GO:0017137]	56	0	323.31	868	75.5	69.1	66.9	71.8	O24653	O24653	1271	GDI2	Guanosine nucleotide diphosphate dissociation inhibitor 2
294071807861328	292998790740967	293327674865723	294350566864014	cell wall macromolecule catabolic process [GO:0016998];chitin catabolic process [GO:0006032];defense response [GO:0006952];polysaccharide catabolic process [GO:0000272]	secretory vesicle [GO:0099503]	chitin binding [GO:0008061];chitinase activity [GO:0004568]	8	0	323.31	204	36.7	38.6	22.3	38.6	O24658	O24658	1272	At2g43590	Endochitinase At2g43590
219191799163818	NaN	212404537200928	NaN	translation [GO:0006412]	cytosol [GO:0005829];cytosolic ribosome [GO:0022626];cytosolic small ribosomal subunit [GO:0022627];nucleolus [GO:0005730];plasma membrane [GO:0005886];plasmodesma [GO:0009506];polysomal ribosome [GO:0042788]	mRNA binding [GO:0003729];structural constituent of ribosome [GO:0003735]	44	0	248.56	140	8.4	0	5.6	7.2	O48549	O48549	1276	RPS6A	40S ribosomal protein S6-1
284503002166748	284927043914795	28539083480835	286008434295654	cellular response to hypoxia [GO:0071456]		hydrolase activity [GO:0016787]	14	0	31.931	91	47.1	43.1	47.1	40	O48587	O48587	1277	T19K24.16	At5g44730
313286552429199	311736106872559	310585956573486	311782493591309		cytosol [GO:0005829]	catalytic activity [GO:0003824];molybdenum ion binding [GO:0030151];pyridoxal phosphate binding [GO:0030170]	31	0	322.4	378	75.3	77.6	65.9	67.5	O48588	O48588	1278	T19K24.17	Molybdenum cofactor sulfurase family protein
324586296081543	325767974853516	325511703491211	325089988708496	asparaginyl-tRNA aminoacylation [GO:0006421];plant ovule development [GO:0048481]	chloroplast [GO:0009507];chloroplast stroma [GO:0009570];mitochondrion [GO:0005739]	asparagine-tRNA ligase activity [GO:0004816];ATP binding [GO:0005524];DNA binding [GO:0003677]	37	0	323.31	487	40.4	43.6	40	42.7	O48593	O48593	1279	SYNO	Asparagine--tRNA ligase, chloroplastic/mitochondrial
304932384490967	304645080566406	302681865692139	302972354888916	response to cadmium ion [GO:0046686];response to oxidative stress [GO:0006979]	chloroplast [GO:0009507];cytosol [GO:0005829];mitochondrion [GO:0005739];plasma membrane [GO:0005886]	glutathione peroxidase activity [GO:0004602];peroxidase activity [GO:0004601];phospholipid-hydroperoxide glutathione peroxidase activity [GO:0047066]	31	0	257.24	404	51.7	68.5	67.2	65.5	O48646	O48646	1280	GPX6	Probable phospholipid hydroperoxide glutathione peroxidase 6, mitochondrial
306995868682861	306112251281738	304855823516846	306451263427734	polyamine biosynthetic process [GO:0006596];spermidine biosynthetic process [GO:0008295]	cytosol [GO:0005829];mitochondrion [GO:0005739];plasma membrane [GO:0005886]	spermidine synthase activity [GO:0004766]	23	0	323.31	347	52.4	70	54.1	59.4	O48661	O48661	1281	SPDSYN2	Spermidine synthase 2
308553409576416	309379653930664	308047046661377	309678802490234	defense response by callose deposition in cell wall [GO:0052544];defense response to bacterium [GO:0042742];glucosinolate biosynthetic process [GO:0019761]	cytosol [GO:0005829];intracellular membrane-bounded organelle [GO:0043231];nucleus [GO:0005634]	quercetin 3-O-glucosyltransferase activity [GO:0080043];quercetin 7-O-glucosyltransferase activity [GO:0080044];thiohydroximate beta-D-glucosyltransferase activity [GO:0047251];UDP-glucose: 4-methylthiobutylhydroximate S-glucosyltransferase activity [GO:0102659];UDP-glucose: 6-methylthiohexylhydroximate S-glucosyltransferase activity [GO:0103100];UDP-glucose: 9-methylthiononylhydroximate S-glucos…	35	0	295.8	483	43.9	50	46.5	45.9	O48676	O48676	1282	UGT74B1	UDP-glycosyltransferase 74B1
263597946166992	255921211242676	257237205505371	260512561798096	cell wall modification [GO:0042545];pectin catabolic process [GO:0045490];response to bacterium [GO:0009617]	cell wall [GO:0005618];extracellular region [GO:0005576]	aspartyl esterase activity [GO:0045330];pectinesterase activity [GO:0030599];pectinesterase inhibitor activity [GO:0046910]	5	0	10.406	27	9	9	7.1	9	O48711	O48711	1284	PME12	Probable pectinesterase/pectinesterase inhibitor 12
287895183563232	290306797027588	289606075286865	290586605072021	chloroplast accumulation movement [GO:0009904];chloroplast avoidance movement [GO:0009903]	cytosol [GO:0005829];peroxisome [GO:0005777];plasma membrane [GO:0005886]		25	0	62.364	151	15.9	13	16	18.2	O48724	O48724	1286	WEB1	Protein WEAK CHLOROPLAST MOVEMENT UNDER BLUE LIGHT 1
256715240478516	25417896270752	247684516906738	252792339324951	ubiquitin-dependent protein catabolic process [GO:0006511]	cytoplasm [GO:0005737];nucleus [GO:0005634];proteasome regulatory particle, lid subcomplex [GO:0008541]	endopeptidase activator activity [GO:0061133];proteasome binding [GO:0070628];ubiquitin binding [GO:0043130]	8	0	25.24	33	10	6.7	6.7	10	O48726	O48726	1287	RPN13	26S proteasome regulatory subunit RPN13
297964363098145	299055519104004	293631286621094	296716194152832	cell redox homeostasis [GO:0045454];glycerol ether metabolic process [GO:0006662];negative regulation of catalytic activity [GO:0043086];positive regulation of catalytic activity [GO:0043085];regulation of carbohydrate metabolic process [GO:0006109];response to cold [GO:0009409]	apoplast [GO:0048046];chloroplast [GO:0009507];chloroplast envelope [GO:0009941];chloroplast stroma [GO:0009570];cytoplasm [GO:0005737];extracellular region [GO:0005576];stromule [GO:0010319];thylakoid [GO:0009579]	enzyme activator activity [GO:0008047];enzyme inhibitor activity [GO:0004857];oxidoreductase activity, acting on a sulfur group of donors, disulfide as acceptor [GO:0016671];protein disulfide oxidoreductase activity [GO:0015035];protein-disulfide reductase activity [GO:0047134]	13	0	228.03	144	39.7	39.7	39.7	39.7	O48737	O48737	1288	At1g03680	Thioredoxin M1, chloroplastic
316734142303467	316562957763672	316533946990967	308382339477539	chlorophyll biosynthetic process [GO:0015995];photosynthesis [GO:0015979]	chloroplast [GO:0009507];chloroplast envelope [GO:0009941];chloroplast membrane [GO:0031969];chloroplast thylakoid [GO:0009534];chloroplast thylakoid membrane [GO:0009535];extracellular region [GO:0005576]	NADPH dehydrogenase activity [GO:0003959];protochlorophyllide reductase activity [GO:0016630]	43	0	323.31	515	61.6	60.8	62.3	60.8	O48741	O48741	1289	PORC	Protochlorophyllide reductase C, chloroplastic
NaN	222661933898926	229242458343506	NaN	cytokinesis by cell plate formation [GO:0000911];microtubule nucleation [GO:0007020];microtubule organizing center organization [GO:0031023];mitotic cell cycle [GO:0000278];spindle assembly [GO:0051225]	microtubule [GO:0005874]		2	0.0057595	1.7565	1	0	3.7	3.7	0	O48767	O48767	1290	AUG2	AUGMIN subunit 2
298508186340332	299652671813965	299891548156738	299558773040771	cell redox homeostasis [GO:0045454];response to endoplasmic reticulum stress [GO:0034976]	endoplasmic reticulum [GO:0005783];endoplasmic reticulum lumen [GO:0005788];Golgi apparatus [GO:0005794];plasma membrane [GO:0005886];vacuole [GO:0005773]	protein disulfide isomerase activity [GO:0003756]	26	0	193.07	359	41.4	43.6	42	38.9	O48773	O48773	1291	PDIL2-3	Protein disulfide-isomerase 2-3
25183780670166	254695472717285	257548599243164	255456886291504	carbohydrate metabolic process [GO:0005975]		beta-glucosidase activity [GO:0008422];scopolin beta-glucosidase activity [GO:0102483]	6	0	11.725	31	8	5.9	5.7	3.3	O48779	O48779	1292	BGLU33	Beta-glucosidase 33
280484313964844	275890655517578	278260841369629	278386993408203	carotenoid biosynthetic process [GO:0016117];cellular response to UV-C [GO:0071494];chloroplast-nucleus signaling pathway [GO:0010019];flavonoid biosynthetic process [GO:0009813];heme oxidation [GO:0006788];photosynthesis [GO:0015979];phytochromobilin biosynthetic process [GO:0010024];regulation of meristem growth [GO:0010075];regulation of stomatal movement [GO:0010119]	chloroplast [GO:0009507]	heme binding [GO:0020037];heme oxygenase (decyclizing) activity [GO:0004392];metal ion binding [GO:0046872]	17	0	30.639	94	40.4	35.5	33.7	24.8	O48782	O48782	1293	HO1	Heme oxygenase 1, chloroplastic
286498622894287	286593189239502	291466884613037	285224552154541		integral component of membrane [GO:0016021];peroxisome [GO:0005777];plasma membrane [GO:0005886]	ATP binding [GO:0005524];protein kinase activity [GO:0004672]	15	0	107.66	85	15.2	16.9	16.9	19.1	O48788	O48788	1294	At2g26730	Probable inactive receptor kinase At2g26730
306742992401123	305942363739014	306868724822998	30703800201416		cytosol [GO:0005829];nucleus [GO:0005634]		48	0	323.31	479	49.5	57	52.2	50.7	O48802	O48802	1295	CLMP1	Protein CLMP1
2558669090271	249634056091309	NaN	NaN	plant-type cell wall organization [GO:0009664];syncytium formation [GO:0006949]	cytosol [GO:0005829];extracellular region [GO:0005576];membrane [GO:0016020];plant-type cell wall [GO:0009505];plasmodesma [GO:0009506]		2	0.0014848	2.2519	5	3.5	3.5	0	0	O48818	O48818	1296	EXPA4	Expansin-A4
321209602355957	321668930053711	320442352294922	322435150146484	circadian rhythm [GO:0007623];response to abscisic acid [GO:0009737];response to cold [GO:0009409];response to high light intensity [GO:0009644];response to salt stress [GO:0009651];response to water deprivation [GO:0009414]	chloroplast [GO:0009507];plasma membrane [GO:0005886]		43	0	323.31	672	68.6	76.8	75.9	76.5	O48832	O48832	1297	ERD7	Protein EARLY-RESPONSIVE TO DEHYDRATION 7, chloroplastic
265933475494385	246920547485352	26712797164917	269077033996582	proteasome-mediated ubiquitin-dependent protein catabolic process [GO:0043161];regulation of protein catabolic process [GO:0042176]	cytosol [GO:0005829];endoplasmic reticulum [GO:0005783];nucleus [GO:0005634];proteasome complex [GO:0000502];proteasome regulatory particle, base subcomplex [GO:0008540];proteasome storage granule [GO:0034515]	enzyme regulator activity [GO:0030234]	61	0	323.31	411	10.5	6.7	7.8	8.2	O48844	O48844	1298	RPN2A	26S proteasome non-ATPase regulatory subunit 1 homolog A
312237167358398	31256706237793	314934768676758	312145404815674	cellular response to phosphate starvation [GO:0016036];glycolipid biosynthetic process [GO:0009247];sulfolipid biosynthetic process [GO:0046506]	chloroplast [GO:0009507];plasma membrane [GO:0005886]	sulfotransferase activity [GO:0008146];UDPsulfoquinovose synthase activity [GO:0046507];zinc ion binding [GO:0008270]	31	0	323.31	439	38.2	58.5	55.3	52.2	O48917	O48917	1300	SQD1	UDP-sulfoquinovose synthase, chloroplastic
307410144805908	303978481292725	305264530181885	304642162322998	chloroplast accumulation movement [GO:0009904];chloroplast avoidance movement [GO:0009903];circadian rhythm [GO:0007623];negative regulation of anion channel activity by blue light [GO:0010362];phototropism [GO:0009638];protein autophosphorylation [GO:0046777];protein phosphorylation [GO:0006468];protein-chromophore linkage [GO:0018298];regulation of proton transport [GO:0010155];regulation of st…	cell surface [GO:0009986];cytoplasm [GO:0005737];cytoplasmic side of plasma membrane [GO:0009898];nucleus [GO:0005634];plasma membrane [GO:0005886];vacuole [GO:0005773]	ATP binding [GO:0005524];blue light photoreceptor activity [GO:0009882];FMN binding [GO:0010181];identical protein binding [GO:0042802];kinase activity [GO:0016301];mRNA binding [GO:0003729];protein kinase activity [GO:0004672];protein serine/threonine kinase activity [GO:0004674]	37	0	234.17	230	31.1	29.9	24.8	30.6	O48963	O48963	1302	PHOT1	Phototropin-1
292428855895996	290234527587891	291391925811768	288930473327637	cell wall modification [GO:0042545];defense response to Gram-negative bacterium [GO:0050829];pectin catabolic process [GO:0045490];response to fungus [GO:0009620];response to nematode [GO:0009624]	apoplast [GO:0048046];cell wall [GO:0005618];cytoplasm [GO:0005737];cytosol [GO:0005829];plasma membrane [GO:0005886]	aspartyl esterase activity [GO:0045330];pectinesterase activity [GO:0030599];pectinesterase inhibitor activity [GO:0046910]	22	0	297.2	221	17.2	26	23.5	22.3	O49006	O49006	1303	PME3	Pectinesterase/pectinesterase inhibitor 3
156077060699463	197118282318115	275810394287109	240352344512939	formation of cytoplasmic translation initiation complex [GO:0001732];translational initiation [GO:0006413]	cytosol [GO:0005829];eukaryotic 43S preinitiation complex [GO:0016282];eukaryotic 48S preinitiation complex [GO:0033290];eukaryotic translation initiation factor 3 complex [GO:0005852];nucleus [GO:0005634]	mRNA binding [GO:0003729];translation initiation factor activity [GO:0003743];translation initiation factor binding [GO:0031369]	83	0	323.31	526	1.1	5.8	3	0.8	O49160	O49160	1305	TIF3C1	Eukaryotic translation initiation factor 3 subunit C
261337909698486	26091682434082	263087787628174	264252796173096	defense response [GO:0006952];response to jasmonic acid [GO:0009753]	vacuole [GO:0005773]	acid phosphatase activity [GO:0003993];nutrient reservoir activity [GO:0045735];transcription factor binding [GO:0008134]	9	0	88.954	61	14.8	12.2	8.5	10.7	O49195	O49195	1306	VSP1	Vegetative storage protein 1
267491912841797	NaN	264282875061035	269779281616211	cysteine biosynthetic process [GO:0019344];hydrogen sulfide biosynthetic process [GO:0070814];sulfate assimilation [GO:0000103]	chloroplast [GO:0009507];plastid [GO:0009536]	adenylylsulfate kinase activity [GO:0004020];ATP binding [GO:0005524]	11	0	36.295	24	15	5.1	5.1	8.9	O49196	O49196	1307	APK2	Adenylyl-sulfate kinase 2, chloroplastic
333484992980957	333565216064453	333708801269531	333461227416992	CTP biosynthetic process [GO:0006241];GTP biosynthetic process [GO:0006183];purine nucleotide metabolic process [GO:0006163];pyrimidine nucleotide metabolic process [GO:0006220];response to oxidative stress [GO:0006979];UTP biosynthetic process [GO:0006228]	chloroplast thylakoid lumen [GO:0009543];cytosol [GO:0005829];mitochondrial inner membrane [GO:0005743];mitochondrial intermembrane space [GO:0005758];mitochondrion [GO:0005739];plastid [GO:0009536]	ATP binding [GO:0005524];cobalt ion binding [GO:0050897];nucleoside diphosphate kinase activity [GO:0004550];zinc ion binding [GO:0008270]	24	0	323.31	669	48.7	48.7	48.7	48.7	O49203	O49203	1308	NDPK3	Nucleoside diphosphate kinase III, chloroplastic/mitochondrial
217340507507324	215203247070313	225130157470703	NaN	'de novo' GDP-L-fucose biosynthetic process [GO:0042351];L-fucose biosynthetic process [GO:0006005]		GDP-L-fucose synthase activity [GO:0050577];isomerase activity [GO:0016853]	23	0	60.457	78	28.2	23.5	23.8	19.8	O49213	O49213	1309	GER1	GDP-L-fucose synthase 1
235067596435547	223849811553955	NaN	217209644317627		cytosol [GO:0005829]	amino acid binding [GO:0016597]	20	0	89.116	72	7.7	4	0	2.9	O49285	O49285	1310	ACR3	ACT domain-containing protein ACR3
265286827087402	26796745300293	26192253112793	265293521881104	rRNA processing [GO:0006364]	nucleolus [GO:0005730]	ATP binding [GO:0005524];RNA binding [GO:0003723];RNA helicase activity [GO:0003724]	14	0	12.117	25	1.4	2.6	3.9	1.4	O49289	O49289	1311	RH29	Putative DEAD-box ATP-dependent RNA helicase 29
303247451782227	301504955291748	302230854034424	302187042236328		chloroplast [GO:0009507];chloroplast stroma [GO:0009570]	carboxyvinyl-carboxyphosphonate phosphorylmutase activity [GO:0008807]	18	0	252.79	203	45.4	51	49.3	49.3	O49290	O49290	1312	At1g77060	Carboxyvinyl-carboxyphosphonate phosphorylmutase, chloroplastic
303997859954834	294718704223633	302430896759033	302917575836182	photosynthesis [GO:0015979]	chloroplast [GO:0009507];chloroplast stroma [GO:0009570];chloroplast thylakoid [GO:0009534];chloroplast thylakoid lumen [GO:0009543];cytosol [GO:0005829];extrinsic component of membrane [GO:0019898];mitochondrion [GO:0005739];photosystem II oxygen evolving complex [GO:0009654];thylakoid [GO:0009579];thylakoid lumen [GO:0031977]	calcium ion binding [GO:0005509]	12	0	66.397	128	38.1	38.8	44.6	32.3	O49292	O49292	1313	PPD4	PsbP domain-containing protein 4, chloroplastic
320759086608887	321585235595703	321387062072754	320219459533691	carbohydrate metabolic process [GO:0005975];glucose metabolic process [GO:0006006];response to cadmium ion [GO:0046686]	cytoplasm [GO:0005737];cytosol [GO:0005829];nucleus [GO:0005634];plasma membrane [GO:0005886]	magnesium ion binding [GO:0000287];phosphoglucomutase activity [GO:0004614]	86	0	323.31	1160	62.6	62.4	65.5	55.6	O49299	O49299	1314	At1g23190	Probable phosphoglucomutase, cytoplasmic 1
279198551177979	281533966064453	277989082336426	281591854095459	abscisic acid-activated signaling pathway [GO:0009738];positive regulation of abscisic acid-activated signaling pathway [GO:0009789];positive regulation of GTPase activity [GO:0043547]	cytosol [GO:0005829];nucleus [GO:0005634];plasma membrane [GO:0005886]	GTPase activator activity [GO:0005096];metal ion binding [GO:0046872];phospholipid binding [GO:0005543]	10	0	29.115	82	31.5	35.2	41.8	35.8	O49303	O49303	1315	CAR8	Protein C2-DOMAIN ABA-RELATED 8
321880416870117	32308292388916	323329811096191	323832168579102	defense response [GO:0006952]	cytosol [GO:0005829];nucleus [GO:0005634]		25	0	198.22	349	73.8	84.4	84.4	84.4	O49304	O49304	1316	At1g23130	At1g23130/T26J12_10
264496307373047	NaN	NaN	266965732574463	membrane fusion [GO:0061025];protein transport [GO:0015031];response to abscisic acid [GO:0009737];response to salt stress [GO:0009651];stomatal movement [GO:0010118];vesicle-mediated transport [GO:0016192]	integral component of membrane [GO:0016021];late endosome membrane [GO:0031902];plasma membrane [GO:0005886];vacuolar membrane [GO:0005774];vacuole [GO:0005773]		6	0	26.196	23	16.4	0	0	9.1	O49377	O49377	1320	VAMP711	Vesicle-associated membrane protein 711
244184761047363	245641269683838	242394332885742	240313682556152	chloroplast RNA modification [GO:1900865];cytidine to uridine editing [GO:0016554];mitochondrial mRNA modification [GO:0080156];mitochondrial RNA modification [GO:1900864];mRNA processing [GO:0006397]	chloroplast [GO:0009507];mitochondrion [GO:0005739]	protein dimerization activity [GO:0046983]	2	0	24.541	15	3.1	3.1	3.1	3.1	O49429	O49429	1321	MORF1	Multiple organellar RNA editing factor 1, mitochondrial
314087696075439	31482795715332	314746971130371	314342021942139		cytosol [GO:0005829];plasma membrane [GO:0005886]	mRNA binding [GO:0003729]	19	0	323.31	307	85.6	85.6	73.2	80.4	O49453	O49453	1323	At4g28440	Uncharacterized protein At4g28440
295748844146729	295028095245361	294307174682617	297300720214844	lignin biosynthetic process [GO:0009809]	cytosol [GO:0005829]	cinnamyl-alcohol dehydrogenase activity [GO:0045551];oxidoreductase activity, acting on the CH-OH group of donors, NAD or NADP as acceptor [GO:0016616];sinapyl alcohol dehydrogenase activity [GO:0052747];zinc ion binding [GO:0008270]	39	0	323.31	463	43.7	34.7	26.3	32.2	O49482	O49482	1325	CAD5	Cinnamyl alcohol dehydrogenase 5
332587013244629	332659797668457	331372108459473	331994514465332	cellular amino acid metabolic process [GO:0006520];embryo development ending in seed dormancy [GO:0009793];L-serine biosynthetic process [GO:0006564];megagametogenesis [GO:0009561];pollen development [GO:0009555];sulfur amino acid metabolic process [GO:0000096]	chloroplast [GO:0009507];chloroplast stroma [GO:0009570];mitochondrion [GO:0005739];plasma membrane [GO:0005886];plastid [GO:0009536]	ATP binding [GO:0005524];NAD binding [GO:0051287];phosphoglycerate dehydrogenase activity [GO:0004617]	57	0	323.31	1312	64	62.9	64	61.5	O49485	O49485	1326	PGDH1	D-3-phosphoglycerate dehydrogenase 1, chloroplastic
316218280792236	317758827209473	315791625976563	317676181793213	coumarin biosynthetic process [GO:0009805];lignin biosynthetic process [GO:0009809];methylation [GO:0032259];response to cadmium ion [GO:0046686]	cytosol [GO:0005829];plasma membrane [GO:0005886]	caffeoyl-CoA O-methyltransferase activity [GO:0042409];metal ion binding [GO:0046872];S-adenosylmethionine-dependent methyltransferase activity [GO:0008757]	38	0	323.31	1093	83.8	82.2	82.2	82.6	O49499	O49499	1327	CCOAOMT1	Caffeoyl-CoA O-methyltransferase 1
244211750030518	246568183898926	NaN	253182754516602	intracellular protein transport [GO:0006886];Rab protein signal transduction [GO:0032482]	cytosol [GO:0005829];endomembrane system [GO:0012505];endosome [GO:0005768];plasma membrane [GO:0005886]	GTP binding [GO:0005525];GTPase activity [GO:0003924]	5	0	5.507	20	5.1	5.1	8.3	8.8	O49513	O49513	1329	RABA1E	Ras-related protein RABA1e
29503604888916	295208644866943	296692562103271	298455352783203	[2Fe-2S] cluster assembly [GO:0044571];iron-sulfur cluster assembly [GO:0016226]	cytosol [GO:0005829];mitochondrion [GO:0005739];plastid [GO:0009536]	ATP binding [GO:0005524];cysteine desulfurase activity [GO:0031071];iron-sulfur cluster binding [GO:0051536];pyridoxal phosphate binding [GO:0030170];zinc ion binding [GO:0008270]	38	0	323.31	374	40.2	48.3	49	51	O49543	O49543	1331	NIFS1	Cysteine desulfurase, mitochondrial
253301239013672	249963226318359	250526256561279	252523059844971	cell differentiation [GO:0030154];floral organ development [GO:0048437];gametophyte development [GO:0048229];hormone-mediated signaling pathway [GO:0009755];regulation of meristem growth [GO:0010075];regulation of meristem structural organization [GO:0009934]	integral component of membrane [GO:0016021];plasma membrane [GO:0005886]	ATP binding [GO:0005524];identical protein binding [GO:0042802];protein self-association [GO:0043621];protein serine/threonine kinase activity [GO:0004674];receptor serine/threonine kinase binding [GO:0033612]	5	0.00094073	2.4805	11	0.7	0.7	0.7	0.7	O49545	O49545	1332	BAM1	Leucine-rich repeat receptor-like serine/threonine-protein kinase BAM1
257846660614014	257853393554688	262475147247314	245263557434082	embryo development ending in seed dormancy [GO:0009793];nucleotide-excision repair [GO:0006289];proteasome-mediated ubiquitin-dependent protein catabolic process [GO:0043161];protein ubiquitination [GO:0016567];red, far-red light phototransduction [GO:0009585]	cullin-RING ubiquitin ligase complex [GO:0031461];cytosol [GO:0005829];nucleus [GO:0005634]	damaged DNA binding [GO:0003684]	31	0	20.035	82	9.2	7.8	11.3	5.3	O49552	O49552	1333	DDB1B	DNA damage-binding protein 1b
245660457611084	NaN	243607158660889	236875247955322	mRNA splicing, via spliceosome [GO:0000398]	cytosol [GO:0005829];spliceosomal complex [GO:0005681]		5	0	15.801	29	21.4	0	18.6	11	O49553	O49553	1334	At4g21110	AT4g21110/F7J7_50
313650493621826	313004016876221	310556907653809	31303617477417		chloroplast [GO:0009507];chloroplast stroma [GO:0009570]	ATP binding [GO:0005524];phosphoprotein phosphatase activity [GO:0004721];phosphotransferase activity, phosphate group as acceptor [GO:0016776];protein kinase activity [GO:0004672];protein serine/threonine kinase activity [GO:0004674]	38	0	323.31	376	77.7	83.9	75.9	63	O49562	O49562	1335	RP1	Pyruvate, phosphate dikinase regulatory protein 1, chloroplastic
247275428771973	250389633178711	252097015380859	252412910461426	chromatin assembly or disassembly [GO:0006333]	chromatin [GO:0000785];cytosol [GO:0005829];nucleus [GO:0005634]	chromatin binding [GO:0003682];DNA binding [GO:0003677];DNA-binding transcription factor activity [GO:0003700];structural constituent of chromatin [GO:0030527]	5	0	10.987	19	24.3	18.1	14.6	24.3	O49596	O49596	1337	HMGB2	High mobility group B protein 2
264095363616943	260625190734863	259377536773682	258194351196289	negative regulation of catalytic activity [GO:0043086];response to karrikin [GO:0080167]	vacuole [GO:0005773]	enzyme inhibitor activity [GO:0004857]	5	0	9.5103	16	13.9	30	8.9	20	O49603	O49603	1338	C/VIF2	Cell wall / vacuolar inhibitor of fructosidase 2
299899654388428	301213932037354	29946704864502	299371929168701	plant-type cell wall modification [GO:0009827]	plasma membrane [GO:0005886]	serine-type endopeptidase activity [GO:0004252];serine-type peptidase activity [GO:0008236]	24	0	144.92	181	24.3	28.3	30	28.3	O49607	O49607	1339	SBT1.6	Subtilisin-like protease SBT1.6
263224601745605	265292491912842	250413055419922	254723091125488	cellular iron ion homeostasis [GO:0006879];iron-sulfur cluster assembly [GO:0016226]	cytoplasm [GO:0005737];cytosol [GO:0005829];mitochondrial matrix [GO:0005759];mitochondrion [GO:0005739]	2 iron, 2 sulfur cluster binding [GO:0051537];4 iron, 4 sulfur cluster binding [GO:0051539];ferrous iron binding [GO:0008198];structural molecule activity [GO:0005198]	8	0	48.586	34	28.7	16.8	22.2	22.2	O49627	O49627	1341	ISU1	Iron-sulfur cluster assembly protein 1
274082736968994	276090068817139	275103569030762	272434539794922		chloroplast [GO:0009507];chloroplast thylakoid [GO:0009534];chloroplast thylakoid membrane [GO:0009535];cytosol [GO:0005829];mitochondrion [GO:0005739];plastoglobule [GO:0010287];thylakoid [GO:0009579];thylakoid lumen [GO:0031977]		12	0	102.2	103	37.4	20	26.5	18.7	O49629	O49629	1342	PAP2	Probable plastid-lipid-associated protein 2, chloroplastic
280527400970459	278329181671143	28033805847168	275577163696289	tRNA threonylcarbamoyladenosine modification [GO:0002949]	cytosol [GO:0005829];EKC/KEOPS complex [GO:0000408];nucleus [GO:0005634]	metal ion binding [GO:0046872];N(6)-L-threonylcarbamoyladenine synthase activity [GO:0061711]	10	0	70.028	94	11.6	16.4	16.4	24.4	O49653	O49653	1343	GCP2	Probable tRNA N6-adenosine threonylcarbamoyltransferase
306855373382568	307328720092773	301285400390625	301200332641602	carotene catabolic process [GO:0016121]	chloroplast [GO:0009507];chloroplast stroma [GO:0009570];cytosol [GO:0005829];plastoglobule [GO:0010287]	carotenoid dioxygenase activity [GO:0010436];metal ion binding [GO:0046872]	34	0	155.45	293	41.5	52.3	52.3	54.6	O49675	O49675	1345	CCD4	Probable carotenoid cleavage dioxygenase 4, chloroplastic
295109024047852	296442852020264	29615406036377	29512882232666	abscisic acid-activated signaling pathway [GO:0009738];positive regulation of response to water deprivation [GO:1902584];regulation of protein serine/threonine phosphatase activity [GO:0080163]	cytoplasm [GO:0005737];cytosol [GO:0005829];nucleus [GO:0005634];plasma membrane [GO:0005886]	abscisic acid binding [GO:0010427];identical protein binding [GO:0042802];protein homodimerization activity [GO:0042803];protein phosphatase inhibitor activity [GO:0004864];signaling receptor activity [GO:0038023]	19	0	166.08	300	64.9	63.4	62.8	69.6	O49686	O49686	1346	PYR1	Abscisic acid receptor PYR1
368296279907227	36816333770752	368520126342773	368442001342773	DNA methylation-dependent heterochromatin assembly [GO:0006346];methionine biosynthetic process [GO:0009086];methylation [GO:0032259];positive regulation of histone H3-K9 methylation [GO:0051574];response to cadmium ion [GO:0046686];response to zinc ion [GO:0010043]	apoplast [GO:0048046];chloroplast [GO:0009507];chloroplast stroma [GO:0009570];cytosol [GO:0005829];extracellular region [GO:0005576];peroxisome [GO:0005777];plasma membrane [GO:0005886];plasmodesma [GO:0009506];vacuolar membrane [GO:0005774]	5-methyltetrahydropteroyltriglutamate-homocysteine S-methyltransferase activity [GO:0003871];copper ion binding [GO:0005507];methionine synthase activity [GO:0008705];zinc ion binding [GO:0008270]	122	0	323.31	5957	88.2	88.9	88.9	87.3	O50008	O50008	1348	MS1	5-methyltetrahydropteroyltriglutamate--homocysteine methyltransferase 1
304236221313477	304716968536377	302879104614258	304018211364746	arginine biosynthetic process via ornithine [GO:0042450];citrulline biosynthetic process [GO:0019240]	chloroplast [GO:0009507];chloroplast stroma [GO:0009570];intracellular membrane-bounded organelle [GO:0043231]	amino acid binding [GO:0016597];ornithine carbamoyltransferase activity [GO:0004585]	26	0	155.18	389	53.3	42.4	47.5	45.3	O50039	O50039	1349	OTC	Ornithine carbamoyltransferase, chloroplastic
304774990081787	303121376037598	3060133934021	30512674331665	formation of translation preinitiation complex [GO:0001731];positive regulation of translational fidelity [GO:0045903]	cytoplasm [GO:0005737];cytosol [GO:0005829];eukaryotic translation initiation factor 2 complex [GO:0005850];extracellular region [GO:0005576]	GTP binding [GO:0005525];GTPase activity [GO:0003924];translation initiation factor activity [GO:0003743]	34	0	233.13	448	51.4	44.5	42.2	48	O64490	O64490	1351	EIF2 GAMMA	Eukaryotic translation initiation factor 2 gamma subunit
301890735626221	30161828994751	299453105926514	302221641540527	defense response [GO:0006952];positive regulation of programmed cell death [GO:0043068];protein autoprocessing [GO:0016540]	cytoplasm [GO:0005737];cytosol [GO:0005829];mitochondrion [GO:0005739];plasma membrane [GO:0005886];plasmodesma [GO:0009506]	cysteine-type endopeptidase activity [GO:0004197];cysteine-type peptidase activity [GO:0008234];identical protein binding [GO:0042802]	46	0	323.31	508	34.4	31.6	34	27.3	O64517	O64517	1352	AMC4	Metacaspase-4
317066440582275	318891792297363	319276180267334	318465518951416	embryo development ending in seed dormancy [GO:0009793];transsulfuration [GO:0019346]	chloroplast [GO:0009507];cytosol [GO:0005829];mitochondrion [GO:0005739]	3-mercaptopyruvate sulfurtransferase activity [GO:0016784];sulfurtransferase activity [GO:0016783];thiosulfate sulfurtransferase activity [GO:0004792]	31	0	323.31	646	70.7	72.3	63.9	72	O64530	O64530	1354	STR1	Thiosulfate/3-mercaptopyruvate sulfurtransferase 1, mitochondrial
282463550567627	281580295562744	279637794494629	28157787322998	catabolic process [GO:0009056]		hydrolase activity [GO:0016787];methyl indole-3-acetate esterase activity [GO:0080030]	12	0	59.719	61	25.2	30.1	26.4	31.6	O64640	O64640	1356	CXE8	Probable carboxylesterase 8
220761051177979	NaN	NaN	220509910583496	response to abscisic acid [GO:0009737];response to salt stress [GO:0009651]	cytosol [GO:0005829];nucleolus [GO:0005730]		6	0	9.8419	27	11.2	0	0	10.5	O64644	O64644	1358	At2g45640	Histone deacetylase complex subunit SAP18
NaN	250459766387939	249882392883301	249073829650879	acetyl-CoA biosynthetic process from pyruvate [GO:0006086];glycolytic process [GO:0006096];pollen tube development [GO:0048868]	chloroplast envelope [GO:0009941];endoplasmic reticulum [GO:0005783]	pyruvate dehydrogenase (acetyl-transferring) activity [GO:0004739];zinc ion binding [GO:0008270]	16	0	29.051	24	17	19.2	11.1	17.7	O64688	O64688	1360	E1-BETA-2	Pyruvate dehydrogenase E1 component subunit beta-3, chloroplastic
NaN	18968599319458	253683300018311	NaN	cytoplasmic microtubule organization [GO:0031122]	endoplasmic reticulum [GO:0005783];nucleus [GO:0005634]	ATP binding [GO:0005524];ATPase activity [GO:0016887];hydrolase activity [GO:0016787];microtubule-severing ATPase activity [GO:0008568]	27	0	130.24	160	0	2.3	3.1	0	O64691;B9DGC0	O64691	1361	CCP1	AT2G34560 protein
275572052001953	275566921234131	276707420349121	2737451171875		anchored component of membrane [GO:0031225];endoplasmic reticulum [GO:0005783];plant-type cell wall [GO:0009505];plasma membrane [GO:0005886]		14	0	76.986	64	24.4	20.7	23.4	24.4	O64696	O64696	1362	At2g34510	Uncharacterized protein At2g34510
265311698913574	266163864135742	269553775787354	267855644226074	nitrogen compound metabolic process [GO:0006807];positive regulation of catalytic activity [GO:0043085]		GTP binding [GO:0005525];GTPase activity [GO:0003924];nickel cation binding [GO:0016151]	21	0	225.69	125	16.7	16	23.6	26.9	O64700	O64700	1363	UREG	Urease accessory protein G
286444053649902	283114242553711	28572790145874	284071407318115	cellular response to light stimulus [GO:0071482];peptidyl-threonine dephosphorylation [GO:0035970];thylakoid membrane organization [GO:0010027]	chloroplast [GO:0009507];chloroplast stroma [GO:0009570]	metal ion binding [GO:0046872];phosphoprotein phosphatase activity [GO:0004721]	8	0	51.298	74	25.2	28.2	25.2	25.2	O64730	O64730	1365	At2g30170	Probable protein phosphatase 2C 26
28770866394043	28649040222168	285026760101318	286875915527344	regulation of flower development [GO:0009909]	cytoplasm [GO:0005737];cytosol [GO:0005829];intracellular membrane-bounded organelle [GO:0043231];nucleus [GO:0005634]	UDP-glycosyltransferase activity [GO:0008194]	23	0	103.21	251	32.1	31.2	33.2	36.9	O64733	O64733	1366	UGT87A2	UDP-glycosyltransferase 87A2
277668609619141	263554668426514	282749767303467	281254386901855	COPII-coated vesicle budding [GO:0090114];mRNA transport [GO:0051028];protein transport [GO:0015031]	COPII vesicle coat [GO:0030127];cytosol [GO:0005829];endoplasmic reticulum [GO:0005783];Golgi membrane [GO:0000139];nuclear envelope [GO:0005635];nuclear pore [GO:0005643];nuclear pore outer ring [GO:0031080];nucleolus [GO:0005730]	structural molecule activity [GO:0005198]	29	0	323.31	271	45	23.5	35.1	37.4	O64740	O64740	1367	SEC13B	Protein transport protein SEC13 homolog B
269750881195068	272314167022705	277397613525391	274473476409912	embryo development ending in seed dormancy [GO:0009793];polar nucleus fusion [GO:0010197]	cell wall [GO:0005618];extracellular region [GO:0005576];plasmodesma [GO:0009506]	cinnamyl-alcohol dehydrogenase activity [GO:0045551];coniferyl-alcohol dehydrogenase activity [GO:0050268];FAD binding [GO:0071949];sinapyl alcohol dehydrogenase activity [GO:0052747]	23	0	97.973	164	14.5	20.3	17.3	19.9	O64743	O64743	1368	MEE23	Berberine bridge enzyme-like 15
299691162109375	297381992340088	298939437866211	297655181884766	response to jasmonic acid [GO:0009753];response to wounding [GO:0009611]	cell wall [GO:0005618];extracellular region [GO:0005576]	FAD binding [GO:0071949];oxidoreductase activity [GO:0016491]	28	0	65.878	236	39.1	35	35.7	44.3	O64745	O64745	1369	At2g34810	Berberine bridge enzyme-like 16
27582836151123	275260429382324	275489253997803	279161014556885	defense response to fungus [GO:0050832];response to oomycetes [GO:0002239]	cell wall [GO:0005618]		19	0	94.03	121	15.4	15.4	12.7	15.5	O64757	O64757	1370	At2g34930	Disease resistance family protein / LRR family protein
230955657958984	NaN	NaN	210650005340576		cytosol [GO:0005829];eukaryotic translation initiation factor 2B complex [GO:0005851]	guanyl-nucleotide exchange factor activity [GO:0005085];nucleotidyltransferase activity [GO:0016779];translation initiation factor activity [GO:0003743];translation initiation factor binding [GO:0031369]	24	0	96.425	90	5.5	0	0	1.6	O64760	O64760	1371	At2g34970	At2g34970
277018699645996	28091287612915	27897180557251	278705596923828		cytosol [GO:0005829];endoplasmic reticulum [GO:0005783];mitochondrial matrix [GO:0005759];mitochondrion [GO:0005739]	oxidoreductase activity, acting on a sulfur group of donors, disulfide as acceptor [GO:0016671]	10	0	17.724	113	34	31.4	26.3	33	O64764	O64764	1372	At2g35010	Thioredoxin O1, mitochondrial
264718742370605	265793151855469	270588932037354	267551898956299	embryo development ending in seed dormancy [GO:0009793];embryo sac development [GO:0009553];pollen development [GO:0009555];UDP-glucose metabolic process [GO:0006011];UDP-N-acetylgalactosamine metabolic process [GO:0019276];UDP-N-acetylglucosamine biosynthetic process [GO:0006048];UDP-N-acetylglucosamine metabolic process [GO:0006047]	cytoplasm [GO:0005737]	UDP-N-acetylgalactosamine diphosphorylase activity [GO:0052630];UDP-N-acetylglucosamine diphosphorylase activity [GO:0003977];uridylyltransferase activity [GO:0070569];UTP:glucose-1-phosphate uridylyltransferase activity [GO:0003983]	18	0	33.271	42	25.7	31.5	26.9	28.1	O64765	O64765	1373	GLCNAC1PUT2	UDP-N-acetylglucosamine diphosphorylase 2
322285118103027	322923622131348	322917022705078	323312454223633	purine nucleotide biosynthetic process [GO:0006164]		IMP cyclohydrolase activity [GO:0003937];phosphoribosylaminoimidazolecarboxamide formyltransferase activity [GO:0004643]	56	0	323.31	1128	75.6	83.9	79.6	78.2	O64767	O64767	1374	At2g35040	AICARFT/IMPCHase bienzyme family protein
273947658538818	270241146087646	270443725585938	272151203155518	signal transduction [GO:0007165]	cytoplasm [GO:0005737]	ATP binding [GO:0005524];protein kinase activity [GO:0004672];protein serine/threonine/tyrosine kinase activity [GO:0004712]	21	0	23.64	88	9	7	8	10.3	O64768	O64768	1375	At2g35050	Kinase superfamily with octicosapeptide/Phox/Bem1p domain-containing protein
264232292175293	265121955871582	266290912628174	257621288299561	secondary metabolic process [GO:0019748]	extracellular region [GO:0005576]	serine-type carboxypeptidase activity [GO:0004185];transferase activity, transferring acyl groups other than amino-acyl groups [GO:0016747]	13	0	23.529	25	16.9	11.9	5.7	24.5	O64810	O64810	1377	SCPL10	Serine carboxypeptidase-like 10
255201930999756	256113014221191	254532794952393	256166114807129	secondary metabolic process [GO:0019748]	extracellular region [GO:0005576]	serine-type carboxypeptidase activity [GO:0004185];sinapoylglucose-sinapoylglucose O-sinapoyltransferase activity [GO:0047158];transferase activity, transferring acyl groups other than amino-acyl groups [GO:0016747]	6	0	7.21	25	16.7	14	15.1	13.7	O64811	O64811	1378	SCPL9	Serine carboxypeptidase-like 9
NaN	255659885406494	243769645690918	249885864257813	cellular response to abscisic acid stimulus [GO:0071215];chloroplast-nucleus signaling pathway [GO:0010019];negative regulation of seed germination [GO:0010187];peptidyl-serine phosphorylation [GO:0018105];peptidyl-threonine phosphorylation [GO:0018107];regulation of cell cycle [GO:0051726];regulation of growth [GO:0040008];regulation of photoperiodism, flowering [GO:2000028]	chloroplast [GO:0009507];cytosol [GO:0005829];nucleus [GO:0005634];protein kinase CK2 complex [GO:0005956]	ATP binding [GO:0005524];kinase activity [GO:0016301];protein serine/threonine kinase activity [GO:0004674]	13	0	4.6855	15	3	12.5	13	13.4	O64816	O64816	1379	CKA4	Casein kinase II subunit alpha-4, chloroplastic
228518810272217	233679962158203	239123249053955	228040828704834				1	0.00019139	2.7833	4	2.7	2.7	2.7	2.7	O64856	O64856	1382	At2g44210	At2g44210/F4I1.2
232708492279053	24111795425415	NaN	236969966888428	lipid transport [GO:0006869]	anchored component of membrane [GO:0031225];cytosol [GO:0005829];integral component of membrane [GO:0016021];plasma membrane [GO:0005886]	lipid binding [GO:0008289]	1	0.002037	2.1922	14	5.4	5.4	0	5.4	O64865	O64865	1385	AtXYP10	At2g44300
250926094055176	251764945983887	258965682983398	24933910369873		cytosol [GO:0005829]	calcium ion binding [GO:0005509]	3	0	5.444	16	7.7	7	7.7	7.7	O64866	O64866	1386	At2g44310	Calcium-binding EF-hand family protein
285286903381348	287271537780762	285069179534912	283908367156982	carbohydrate metabolic process [GO:0005975];defense response by callose deposition in cell wall [GO:0052544];defense response to bacterium [GO:0042742];defense response to fungus, incompatible interaction [GO:0009817];glucosinolate catabolic process [GO:0019762];glucosinolate metabolic process [GO:0019760];indole glucosinolate catabolic process [GO:0042344];induced systemic resistance [GO:0009682…	chloroplast envelope [GO:0009941];membrane [GO:0016020];peroxisome [GO:0005777]	beta-glucosidase activity [GO:0008422];scopolin beta-glucosidase activity [GO:0102483];thioglucosidase activity [GO:0019137]	23	0	116.61	176	20.9	16.8	20.4	23.4	O64883	O64883	1388	BGLU26	Beta-glucosidase 26, peroxisomal
322318344116211	322904930114746	321924285888672	322233428955078	auxin-activated signaling pathway [GO:0009734];CTP biosynthetic process [GO:0006241];GTP biosynthetic process [GO:0006183];purine nucleotide metabolic process [GO:0006163];pyrimidine nucleotide metabolic process [GO:0006220];red, far-red light phototransduction [GO:0009585];response to hydrogen peroxide [GO:0042542];response to UV [GO:0009411];UTP biosynthetic process [GO:0006228]	chloroplast [GO:0009507];chloroplast envelope [GO:0009941];chloroplast stroma [GO:0009570];cytoplasm [GO:0005737];nucleus [GO:0005634];plastid [GO:0009536];thylakoid [GO:0009579]	ATP binding [GO:0005524];metal ion binding [GO:0046872];nucleoside diphosphate kinase activity [GO:0004550]	23	0	226.03	331	45	45	45	45	O64903	O64903	1390	NDPK2	Nucleoside diphosphate kinase II, chloroplastic
299864444732666	300451812744141	301163196563721	301898994445801	protein modification by small protein conjugation [GO:0032446];protein neddylation [GO:0045116]	cytoplasm [GO:0005737];cytosol [GO:0005829];nucleus [GO:0005634]	ATP binding [GO:0005524];NEDD8 activating enzyme activity [GO:0019781];protein heterodimerization activity [GO:0046982]	32	0	136.56	402	48.5	42.1	41.4	39	O65041	O65041	1392	ECR1	NEDD8-activating enzyme E1 catalytic subunit
213468399047852	NaN	238227939605713	23361988067627	fatty acid beta-oxidation [GO:0006635];fatty acid beta-oxidation using acyl-CoA oxidase [GO:0033540];lipid homeostasis [GO:0055088];long-chain fatty acid metabolic process [GO:0001676]	peroxisome [GO:0005777]	acyl-CoA oxidase activity [GO:0003997];FAD binding [GO:0071949];fatty acid binding [GO:0005504];flavin adenine dinucleotide binding [GO:0050660]	28	0	63.177	92	1	0	1.3	2.3	O65201	O65201	1393	ACX2	Acyl-coenzyme A oxidase 2, peroxisomal
307904052734375	307083301544189	306045246124268	306149139404297	fatty acid beta-oxidation [GO:0006635];fatty acid beta-oxidation using acyl-CoA oxidase [GO:0033540];jasmonic acid biosynthetic process [GO:0009695];lipid homeostasis [GO:0055088];long-chain fatty acid metabolic process [GO:0001676];response to cadmium ion [GO:0046686];response to fungus [GO:0009620];response to wounding [GO:0009611]	cytosol [GO:0005829];peroxisome [GO:0005777];plasmodesma [GO:0009506]	acyl-CoA oxidase activity [GO:0003997];FAD binding [GO:0071949];fatty acid binding [GO:0005504];flavin adenine dinucleotide binding [GO:0050660]	48	0	323.31	613	35.5	41.1	41.4	42.9	O65202	O65202	1394	ACX1	Peroxisomal acyl-coenzyme A oxidase 1
302023315429688	3059592628479	297725353240967	303624401092529	polysaccharide catabolic process [GO:0000272]	chloroplast [GO:0009507];chloroplast stroma [GO:0009570]	amylopectin maltohydrolase activity [GO:0102229];beta-amylase activity [GO:0016161]	33	0	323.31	358	47.4	44.6	44.8	48.7	O65258	O65258	1395	BAM2	Beta-amylase 2, chloroplastic
297730865478516	299084186553955	299704875946045	297803478240967	one-carbon metabolic process [GO:0006730];photorespiration [GO:0009853];tetrahydrofolate interconversion [GO:0035999]	chloroplast [GO:0009507];cytosol [GO:0005829]	methenyltetrahydrofolate cyclohydrolase activity [GO:0004477];methylenetetrahydrofolate dehydrogenase (NADP+) activity [GO:0004488]	20	0	186.33	308	51.7	52.2	52.5	45.3	O65271	O65271	1396	FOLD4	Bifunctional protein FolD 4, chloroplastic
338479156494141	338843994140625	337384185791016	337957534790039	chaperone cofactor-dependent protein refolding [GO:0051085];negative regulation of abscisic acid-activated signaling pathway [GO:0009788];positive regulation of superoxide dismutase activity [GO:1901671];protein heterotetramerization [GO:0051290];response to cadmium ion [GO:0046686];response to cold [GO:0009409]	apoplast [GO:0048046];chloroplast [GO:0009507];chloroplast envelope [GO:0009941];chloroplast stroma [GO:0009570];chloroplast thylakoid membrane [GO:0009535];mitochondrial matrix [GO:0005759];mitochondrion [GO:0005739];plastid [GO:0009536];thylakoid [GO:0009579]	ATP binding [GO:0005524];chaperone binding [GO:0051087];copper ion binding [GO:0005507];metal ion binding [GO:0046872];unfolded protein binding [GO:0051082]	42	0	323.31	927	77.1	77.1	73.1	73.1	O65282;REV__Q9C7N2	O65282	1397	CPN20	20 kDa chaperonin, chloroplastic
319180145263672	319160232543945	318489398956299	318771591186523	mucilage extrusion from seed coat [GO:0080001];mucilage metabolic process involved in seed coat development [GO:0048359];seed coat development [GO:0010214]	apoplast [GO:0048046];cell wall [GO:0005618];extracellular region [GO:0005576];secretory vesicle [GO:0099503]	serine-type endopeptidase activity [GO:0004252]	31	0	323.31	599	44.9	41.5	43.7	46.4	O65351	O65351	1398	SBT1.7	Subtilisin-like protease SBT1.7
281752185821533	287991256713867	287638568878174	28570837020874	cellular response to fatty acid [GO:0071398];defense response [GO:0006952];ethylene biosynthetic process [GO:0009693]	cytosol [GO:0005829]	1-aminocyclopropane-1-carboxylate oxidase activity [GO:0009815];dioxygenase activity [GO:0051213];L-ascorbic acid binding [GO:0031418];metal ion binding [GO:0046872]	5	0	214.63	53	7.5	7.5	9.7	9.7	O65378	O65378	1401	At1g12010	1-aminocyclopropane-1-carboxylate oxidase 3
337498512268066	337356986999512	337018203735352	337395286560059	methylglyoxal catabolic process to D-lactate via S-lactoyl-glutathione [GO:0019243];response to cadmium ion [GO:0046686]	chloroplast envelope [GO:0009941];cytoplasm [GO:0005737];cytosol [GO:0005829];extracellular region [GO:0005576];peroxisome [GO:0005777];plasma membrane [GO:0005886];secretory vesicle [GO:0099503];vacuole [GO:0005773]	dioxygenase activity [GO:0051213];lactoylglutathione lyase activity [GO:0004462];metal ion binding [GO:0046872]	37	0	323.31	902	65	61.8	63.6	65	O65398	O65398	1402	GLX1	Lactoylglutathione lyase GLX1
271101837158203	273516979217529	273537178039551	271985416412354	carbohydrate metabolic process [GO:0005975];defense response [GO:0006952]	anchored component of plasma membrane [GO:0046658];extracellular region [GO:0005576]	glucan endo-1,3-beta-D-glucosidase activity [GO:0042973]	5	0	22.013	32	11.2	11.2	7.6	7.6	O65399	O65399	1403	At1g11820	Glucan endo-1,3-beta-glucosidase 1
264527759552002	26472354888916	265286521911621	255361728668213	anaphase-promoting complex-dependent catabolic process [GO:0031145];cell cycle [GO:0007049];cell division [GO:0051301];embryo development ending in seed dormancy [GO:0009793];plant ovule development [GO:0048481];positive regulation of mitotic metaphase/anaphase transition [GO:0045842];protein K11-linked ubiquitination [GO:0070979]	anaphase-promoting complex [GO:0005680];nuclear periphery [GO:0034399];nucleus [GO:0005634]		3	0	6.2402	9	2.4	2.4	1.2	1.2	O65418	O65418	1404	APC4	Anaphase-promoting complex subunit 4
314706783294678	314262733459473	315192527770996	31441442489624		cytosol [GO:0005829]	oxidoreductase activity [GO:0016491]	27	0	316.76	500	66.5	63.1	67.7	67.7	O65423	O65423	1406	F18E5.200	AT4g21580/F18E5_200
29239839553833	291285648345947	291226272583008	292077865600586	iron ion homeostasis [GO:0055072];iron ion transport [GO:0006826]	plasma membrane [GO:0005886];plasmodesma [GO:0009506]	copper ion binding [GO:0005507];ferroxidase activity [GO:0004322]	13	0	71.558	144	18.1	26.2	19.6	25.5	O65449	O65449	1408	sks4	At4g22010
310355777740479	30926700592041	303947868347168	306239223480225	programmed cell death [GO:0012501];response to salicylic acid [GO:0009751];systemic acquired resistance [GO:0009627]	apoplast [GO:0048046];secretory vesicle [GO:0099503]		7	0	169.8	82	29.4	29.4	32.8	32.8	O65469	O65469	1409	CRK9	Putative cysteine-rich receptor-like protein kinase 9
NaN	255424156188965	247028198242188	254439849853516	programmed cell death involved in cell development [GO:0010623];proteolysis involved in cellular protein catabolic process [GO:0051603]	extracellular space [GO:0005615];lysosome [GO:0005764];nucleus [GO:0005634];plant-type vacuole [GO:0000325];plasma membrane [GO:0005886]	cysteine-type endopeptidase activity [GO:0004197]	7	0	33.144	29	0	6.8	4.5	6.8	O65493	O65493	1410	XCP1	Cysteine protease XCP1
293067817687988	295721035003662	294874229431152	294956607818604	photosystem II assembly [GO:0010207]	chloroplast [GO:0009507];chloroplast stroma [GO:0009570];chloroplast thylakoid [GO:0009534];chloroplast thylakoid membrane [GO:0009535];photosystem II [GO:0009523];plasma membrane [GO:0005886];thylakoid membrane [GO:0042651]	translation initiation factor activity [GO:0003743]	4	0	7.49	11	2.3	2.3	2.3	2.3	O65502	O65502	1411	HCF244	Protein HIGH CHLOROPHYLL FLUORESCENCE PHENOTYPE 244, chloroplastic
268501930236816	264442844390869	26580753326416	263550968170166	signal transduction [GO:0007165]	integral component of membrane [GO:0016021]	ADP binding [GO:0043531]	2	0.0062724	1.6946	11	1.4	1.4	1.4	1.4	O65507	O65507	1412	At4g36150	Disease resistance protein (TIR-NBS-LRR class) family
320041046142578	319982967376709	319827442169189	319552192687988	actin filament capping [GO:0051693];actin filament depolymerization [GO:0030042];actin filament organization [GO:0007015];actin filament severing [GO:0051014];actin polymerization or depolymerization [GO:0008154];cytoplasmic streaming [GO:0099636];response to abscisic acid [GO:0009737];root hair elongation [GO:0048767]	actin cytoskeleton [GO:0015629];cytoplasm [GO:0005737];cytosol [GO:0005829];plasma membrane [GO:0005886]	actin filament binding [GO:0051015]	87	0	323.31	1043	46.5	55.3	52.3	52.8	O65570	O65570	1414	VLN4	Villin-4
NaN	231086883544922	NaN	237726364135742	carotene catabolic process [GO:0016121];carotenoid catabolic process [GO:0016118];xanthophyll catabolic process [GO:0016124]	chloroplast [GO:0009507];chloroplast stroma [GO:0009570];cytoplasm [GO:0005737];cytosol [GO:0005829];Golgi apparatus [GO:0005794];plasma membrane [GO:0005886];plasmodesma [GO:0009506];vacuolar membrane [GO:0005774];vacuole [GO:0005773]	9-cis-epoxycarotenoid dioxygenase activity [GO:0045549];carotenoid dioxygenase activity [GO:0010436];metal ion binding [GO:0046872]	2	0.00094251	2.5206	7	0	1.3	0	2.2	O65572	O65572	1415	CCD1	Carotenoid 9,10(9',10')-cleavage dioxygenase 1
342367057800293	342482032775879	341768226623535	342668876647949	fructose 1,6-bisphosphate metabolic process [GO:0030388];gluconeogenesis [GO:0006094];glycolytic process [GO:0006096]	cytosol [GO:0005829]	fructose-bisphosphate aldolase activity [GO:0004332]	49	0	323.31	1159	83.8	89.7	76.5	85.5	O65581	O65581	1416	FBA5	Fructose-bisphosphate aldolase 5, cytosolic
296018180847168	2969557762146	29852725982666	297691173553467	cold acclimation [GO:0009631];DNA duplex unwinding [GO:0032508];response to cold [GO:0009409];response to salt stress [GO:0009651];response to water deprivation [GO:0009414];RNA secondary structure unwinding [GO:0010501]	cytoplasm [GO:0005737];nucleus [GO:0005634];plasma membrane [GO:0005886]	double-stranded DNA binding [GO:0003690];mRNA binding [GO:0003729];nucleic acid binding [GO:0003676];RNA binding [GO:0003723];single-stranded DNA binding [GO:0003697];zinc ion binding [GO:0008270]	20	0	323.31	353	61.5	58.2	67.2	67.2	O65639;A0A1P8B8F3	O65639	1420	CSP1;CSDP1	Cold shock protein 1;Cold shock domain protein 1
273024311065674	26645263671875	273608493804932	267364730834961	positive regulation of leaf senescence [GO:1900057];response to hydroperoxide [GO:0033194]		pinoresinol reductase activity [GO:0010283]	9	0	11.361	38	7.8	14.4	15	11.4	O65679	O65679	1423	PLR3	Probable pinoresinol-lariciresinol reductase 3
246915225982666	NaN	NaN	25082088470459	ribosome biogenesis [GO:0042254];rRNA processing [GO:0006364]	chloroplast [GO:0009507]	ribosomal small subunit binding [GO:0043024]	3	0.00019223	2.8374	19	7.4	4.2	4.2	7.4	O65693	O65693	1424	At4g34730	Probable ribosome-binding factor A, chloroplastic
343858680725098	344532318115234	344631309509277	344835777282715	cellular response to unfolded protein [GO:0034620];chaperone cofactor-dependent protein refolding [GO:0051085];protein refolding [GO:0042026];response to cadmium ion [GO:0046686];response to heat [GO:0009408];response to karrikin [GO:0080167];response to unfolded protein [GO:0006986];response to virus [GO:0009615]	apoplast [GO:0048046];cell wall [GO:0005618];chloroplast [GO:0009507];cytoplasm [GO:0005737];cytosol [GO:0005829];cytosolic ribosome [GO:0022626];Golgi apparatus [GO:0005794];nuclear matrix [GO:0016363];plasma membrane [GO:0005886];plasmodesma [GO:0009506];vacuolar membrane [GO:0005774];vacuole [GO:0005773]	ATP binding [GO:0005524];ATPase activity [GO:0016887];heat shock protein binding [GO:0031072];misfolded protein binding [GO:0051787];protease binding [GO:0002020];protein folding chaperone [GO:0044183];unfolded protein binding [GO:0051082]	85	0	323.31	1322	81.7	77.5	77.5	77.2	O65719	O65719	1425	HSP70-3	Heat shock 70 kDa protein 3
289976844787598	287313365936279	286864223480225	286713829040527	cytidine catabolic process [GO:0006216];cytidine deamination [GO:0009972]	cytosol [GO:0005829];mitochondrion [GO:0005739]	cytidine deaminase activity [GO:0004126];deoxycytidine deaminase activity [GO:0047844];protein homodimerization activity [GO:0042803];zinc ion binding [GO:0008270]	23	0	285.25	222	42.9	34.6	41.2	36.9	O65896	O65896	1426	CDA1	Cytidine deaminase 1
319856643676758	319626140594482	318538188934326	319028968811035	actin cytoskeleton organization [GO:0030036];actin polymerization or depolymerization [GO:0008154];cell morphogenesis [GO:0000902];establishment or maintenance of cell polarity [GO:0007163];regulation of adenylate cyclase activity [GO:0045761];unidimensional cell growth [GO:0009826]	cortical actin cytoskeleton [GO:0030864];cytosol [GO:0005829]	actin binding [GO:0003779];adenylate cyclase binding [GO:0008179]	64	0	323.31	802	69.1	63	67	62.6	O65902	O65902	1427	CAP1	Cyclase-associated protein 1
34225902557373	34029354095459	342084197998047	340935668945313	cellular response to light intensity [GO:0071484];cellular response to oxidative stress [GO:0034599];cellular response to ozone [GO:0071457];cellular response to salt stress [GO:0071472];cellular response to sucrose stimulus [GO:0071329];cellular response to UV-B [GO:0071493];gene silencing by miRNA [GO:0035195];removal of superoxide radicals [GO:0019430];response to copper ion [GO:0046688];respo…	apoplast [GO:0048046];chloroplast [GO:0009507];chloroplast stroma [GO:0009570];extracellular region [GO:0005576];extracellular space [GO:0005615];thylakoid [GO:0009579]	copper ion binding [GO:0005507];superoxide dismutase activity [GO:0004784]	11	0	323.31	532	69.9	69.9	69.9	69.9	O78310	O78310	1428	CSD2	Superoxide dismutase [Cu-Zn] 2, chloroplastic
262893486022949	266963081359863	26581901550293	263898029327393	cell cycle [GO:0007049];cell division [GO:0051301];maintenance of root meristem identity [GO:0010078];positive regulation of transcription by RNA polymerase II [GO:0045944];protein phosphorylation [GO:0006468];regulation of cyclin-dependent protein serine/threonine kinase activity [GO:0000079]	cytoplasm [GO:0005737];cytosol [GO:0005829];nucleus [GO:0005634];transcription factor TFIIK complex [GO:0070985]	ATP binding [GO:0005524];cyclin-dependent protein serine/threonine kinase activity [GO:0004693];protein serine/threonine kinase activity [GO:0004674];RNA polymerase II CTD heptapeptide repeat kinase activity [GO:0008353]	10	0	35.888	65	7.3	5.6	12.3	4.4	O80345	O80345	1429	CDKF-1	Cyclin-dependent kinase F-1
269723510742188	277327919006348	275420036315918	270006694793701	anthocyanin-containing compound biosynthetic process [GO:0009718];chlorophyll biosynthetic process [GO:0015995];positive regulation of transcription, DNA-templated [GO:0045893];response to light stimulus [GO:0009416]	nucleus [GO:0005634];plasma membrane [GO:0005886]		10	0	14.275	25	3	4.3	4.3	3.2	O80386	O80386	1430	CIP7	COP1-interacting protein 7
320347595214844	320365600585938	320152473449707	319807033538818	cellular amino acid metabolic process [GO:0006520];pyridoxal phosphate biosynthetic process [GO:0042823];pyridoxine biosynthetic process [GO:0008615]	chloroplast [GO:0009507];cytosol [GO:0005829];endoplasmic reticulum [GO:0005783]	amine-lyase activity [GO:0016843];protein heterodimerization activity [GO:0046982];pyridoxal 5'-phosphate synthase (glutamine hydrolysing) activity [GO:0036381]	26	0	323.31	394	51.5	51.5	50.8	51.5	O80448	O80448	1433	PDX11	Pyridoxal 5'-phosphate synthase subunit PDX1.1
235362339019775	236728191375732	NaN	NaN	AMP metabolic process [GO:0046033];embryo development ending in seed dormancy [GO:0009793];IMP biosynthetic process [GO:0006188];IMP salvage [GO:0032264];response to abscisic acid [GO:0009737]	cytosol [GO:0005829];endoplasmic reticulum [GO:0005783];integral component of mitochondrial outer membrane [GO:0031307];intracellular membrane-bounded organelle [GO:0043231];nucleus [GO:0005634]	AMP deaminase activity [GO:0003876];ATP binding [GO:0005524];metal ion binding [GO:0046872];protein histidine kinase binding [GO:0043424]	7	0	9.5857	17	1.1	1.1	0	0	O80452	O80452	1435	AMPD	AMP deaminase
242143783569336	236168365478516	243405513763428	246130180358887				2	0.0014886	2.293	7	2.1	2.1	2.1	2.1	O80456	O80456	1436	At2g23390	Acyl-CoA
32696647644043	326402435302734	32588062286377	326613578796387	jasmonic acid metabolic process [GO:0009694];nicotinate metabolic process [GO:1901847];salicylic acid metabolic process [GO:0009696]	cytosol [GO:0005829];vacuole [GO:0005773]	carboxylic ester hydrolase activity [GO:0052689];hydrolase activity [GO:0016787];hydrolase activity, acting on ester bonds [GO:0016788];methyl indole-3-acetate esterase activity [GO:0080030];methyl jasmonate esterase activity [GO:0080032];methyl salicylate esterase activity [GO:0080031]	20	0	323.31	470	59.7	68.4	70	59.7	O80476	O80476	1440	MES2	Methylesterase 2
294589290618896	294358310699463	294122772216797	294121570587158	jasmonic acid metabolic process [GO:0009694];salicylic acid metabolic process [GO:0009696]	vacuole [GO:0005773]	hydrolase activity [GO:0016787];hydrolase activity, acting on ester bonds [GO:0016788];methyl indole-3-acetate esterase activity [GO:0080030];methyl jasmonate esterase activity [GO:0080032];methyl salicylate esterase activity [GO:0080031]	16	0	88.513	182	46.8	33.5	41.4	46.8	O80477	O80477	1441	MES3	Methylesterase 3
290241146087646	290413475036621	292040576934814	290915660858154	host response to induction by symbiont of tumor, nodule or growth in host [GO:0080034];NLS-bearing protein import into nucleus [GO:0006607];symbiont intracellular protein transport in host [GO:0030581]	cytosol [GO:0005829];host cell nucleus [GO:0042025];nuclear envelope [GO:0005635];nucleus [GO:0005634]	nuclear import signal receptor activity [GO:0061608];nuclear localization sequence binding [GO:0008139]	34	0	323.31	288	25.5	27	31	31.4	O80480	O80480	1442	IMPA4	Importin subunit alpha-4
241912937164307	234115753173828	241212348937988	NaN		plasma membrane [GO:0005886]	magnesium-dependent protein serine/threonine phosphatase activity [GO:0004724];metal ion binding [GO:0046872];protein serine/threonine phosphatase activity [GO:0004722]	4	0	28.06	8	6.5	4.2	2.3	0	O80492	O80492	1443	At1g09160	Probable protein phosphatase 2C 5
265078639984131	266711463928223	268086986541748	268462524414063	exocytosis [GO:0006887];intracellular protein transport [GO:0006886];intra-Golgi vesicle-mediated transport [GO:0006891];plant-type cell wall cellulose biosynthetic process [GO:0052324];Rab protein signal transduction [GO:0032482];regulation of cell growth [GO:0001558];retrograde transport, endosome to Golgi [GO:0042147];retrograde vesicle-mediated transport, Golgi to endoplasmic reticulum [GO:00…	cytosol [GO:0005829];endomembrane system [GO:0012505];endosome [GO:0005768];Golgi apparatus [GO:0005794];Golgi membrane [GO:0000139];membrane [GO:0016020];plasma membrane [GO:0005886];plasmodesma [GO:0009506];trans-Golgi network [GO:0005802];vacuolar membrane [GO:0005774]	GTP binding [GO:0005525];GTPase activity [GO:0003924]	6	0	19.962	38	11.1	5.3	11.1	11.1	O80501	O80501	1444	RABH1B	Ras-related protein RABH1b
308511772155762	308206920623779	307807388305664	308190174102783	chaperone cofactor-dependent protein refolding [GO:0051085];protein folding [GO:0006457]	chloroplast [GO:0009507];chloroplast envelope [GO:0009941];chloroplast stroma [GO:0009570];cytosol [GO:0005829];mitochondrial matrix [GO:0005759];plastid [GO:0009536]	chaperone binding [GO:0051087];metal ion binding [GO:0046872];protein domain specific binding [GO:0019904];unfolded protein binding [GO:0051082]	13	0	323.31	166	56.1	66.9	66.9	64	O80504	O80504	1445	CPN10-2	10 kDa chaperonin 2, chloroplastic
276470508575439	273088665008545	271328105926514	266759986877441		anchored component of membrane [GO:0031225];anchored component of plasma membrane [GO:0046658];plasmodesma [GO:0009506]	electron transfer activity [GO:0009055];metal ion binding [GO:0046872]	9	0	258.88	151	28.2	20.3	19.8	20.3	O80517	O80517	1447	At2g44790	Uclacyanin-2
251208400726318	252631301879883	25250825881958	257595653533936	lipid catabolic process [GO:0016042]	chloroplast stroma [GO:0009570];extracellular region [GO:0005576]	hydrolase activity, acting on ester bonds [GO:0016788]	8	0	13.602	25	15.9	10.3	10.5	11.4	O80522	O80522	1448	At1g09390	GDSL esterase/lipase At1g09390
305886192321777	305646553039551	306066436767578	305973491668701	acetyl-CoA biosynthetic process [GO:0006085];lipid metabolic process [GO:0006629]	citrate lyase complex [GO:0009346];cytosol [GO:0005829];extracellular region [GO:0005576]	ATP binding [GO:0005524];ATP citrate synthase activity [GO:0003878]	37	0	323.31	523	57.3	57.8	58.3	53.5	O80526	O80526	1449	ACLA-3	ATP-citrate synthase alpha chain protein 3
290520915985107	289962043762207	291272106170654	290505104064941		secretory vesicle [GO:0099503]	alcohol dehydrogenase (NAD+) activity [GO:0004022];oxidoreductase activity [GO:0016491];oxidoreductase activity, acting on the CH-OH group of donors, NAD or NADP as acceptor [GO:0016616]	16	0	74.708	122	23	30.4	30.4	30.4	O80532;Q5PP57	O80532	1450	At1g09490	At1g09490/F14J9_15
245152683258057	242664222717285	NaN	NaN			alcohol dehydrogenase (NAD+) activity [GO:0004022];oxidoreductase activity [GO:0016491];oxidoreductase activity, acting on the CH-OH group of donors, NAD or NADP as acceptor [GO:0016616]	5	0	4.7664	20	3.4	2.2	0	0	O80533	O80533	1451	At1g09500	At1g09500/F14J9_16
251656475067139	249590320587158	247384605407715	251930618286133	methylation [GO:0032259]	mitochondrion [GO:0005739]	methyltransferase activity [GO:0008168]	5	0	6.7843	25	2.3	2.3	2.3	5.1	O80543	O80543	1452	At1g22800	Putative methyltransferase At1g22800, mitochondrial
300603370666504	266394805908203	NaN	247540950775146	negative regulation of transcription, DNA-templated [GO:0045892];regulation of translation [GO:0006417];response to absence of light [GO:0009646];response to carbon starvation [GO:0090549]	cytosol [GO:0005829];nucleus [GO:0005634]	ribosome binding [GO:0043022]	9	0	7.3512	25	2	1.4	0	4.9	O80548	O80548	1453	MRF2	MA3 DOMAIN-CONTAINING TRANSLATION REGULATORY FACTOR 2
251811275482178	254376182556152	255326404571533	250872764587402	methylation [GO:0032259]	cytosol [GO:0005829]	thiol S-methyltransferase activity [GO:0018708]	4	0	6.8148	24	9.7	9.7	9.7	9.7	O80562	O80562	1454	HOL2	Probable thiol methyltransferase 1
266994876861572	259665985107422	260197734832764	262994117736816	RNA processing [GO:0006396]	nucleus [GO:0005634];ribonucleoprotein complex [GO:1990904]	mRNA binding [GO:0003729]	14	0	31.021	59	12.3	12.1	9.4	8.4	O80567	O80567	1455	LARP6B	La-related protein 6B
262021713256836	266183490753174	265484561920166	262415084838867	inositol trisphosphate metabolic process [GO:0032957];myo-inositol hexakisphosphate biosynthetic process [GO:0010264]	cytosol [GO:0005829]	ATP binding [GO:0005524];inositol tetrakisphosphate 1-kinase activity [GO:0047325];inositol-1,3,4-trisphosphate 5-kinase activity [GO:0052726];inositol-1,3,4-trisphosphate 6-kinase activity [GO:0052725];magnesium ion binding [GO:0000287]	14	0	53.717	53	11.5	7.6	11.1	9	O80568	O80568	1456	ITPK4	Inositol 1,3,4-trisphosphate 5/6-kinase 4
304826030731201	305629272460938	304887447357178	305609245300293	diaminopimelate biosynthetic process [GO:0019877];lysine biosynthetic process via diaminopimelate [GO:0009089]	chloroplast [GO:0009507];chloroplast stroma [GO:0009570];cytosol [GO:0005829]	4-hydroxy-tetrahydrodipicolinate reductase [GO:0008839];NADPH binding [GO:0070402]	19	0	258.41	222	51	55.6	41.8	58.2	O80574	O80574	1457	DAPB1	4-hydroxy-tetrahydrodipicolinate reductase 1, chloroplastic
269098777770996	270359058380127	265906372070313	270350666046143	riboflavin biosynthetic process [GO:0009231]	chloroplast [GO:0009507];chloroplast stroma [GO:0009570];riboflavin synthase complex [GO:0009349]	6,7-dimethyl-8-ribityllumazine synthase activity [GO:0000906]	7	0	36.357	87	13.7	15.4	18.5	23.3	O80575	O80575	1458	At2g44050	6,7-dimethyl-8-ribityllumazine synthase, chloroplastic
246210346221924	206866264343262	NaN	248224048614502	response to cadmium ion [GO:0046686];response to desiccation [GO:0009269]	cytosol [GO:0005829];Golgi apparatus [GO:0005794];plasma membrane [GO:0005886];plasmodesma [GO:0009506]		42	0	323.31	362	6.8	4.6	0	2.2	O80576	O80576	1459	late embryogenesis abundant 26	At2g44060
322608604431152	32193603515625	321802673339844	323032913208008	methionine biosynthetic process [GO:0009086];one-carbon metabolic process [GO:0006730];tetrahydrofolate interconversion [GO:0035999]	cytosol [GO:0005829]	FAD binding [GO:0071949];methylenetetrahydrofolate reductase (NAD(P)H) activity [GO:0004489]	59	0	323.31	1024	82.8	76.6	72.9	79.3	O80585	O80585	1460	MTHFR2	Methylenetetrahydrofolate reductase 2
NaN	247543487548828	28161060333252	267083301544189	carbohydrate metabolic process [GO:0005975];lignin biosynthetic process [GO:0009809]		beta-glucosidase activity [GO:0008422];coniferin beta-glucosidase activity [GO:0047782];scopolin beta-glucosidase activity [GO:0102483]	39	0	323.31	167	0	1.4	2.1	3.5	O80690	O80690	1467	BGLU46	Beta-glucosidase 46
288827667236328	293039989471436	290922470092773	289826679229736	defense response to bacterium [GO:0042742];plant-type hypersensitive response [GO:0009626]		oxidoreductase activity [GO:0016491]	18	0	82.607	171	37.4	42.8	45.9	33.9	O80713	O80713	1469	SDR3a	Short-chain dehydrogenase reductase 3a
297451095581055	296650581359863	296038341522217	297144680023193	cell wall organization [GO:0071555]	extracellular region [GO:0005576];plant-type cell wall [GO:0009505]	carboxylic ester hydrolase activity [GO:0052689];pectin acetylesterase activity [GO:0052793]	22	0	285.02	257	53.6	52.4	52.2	52.9	O80731	O80731	1471	PAE3	Pectin acetylesterase 3
241008529663086	246728191375732	244555072784424	253755397796631		cytosol [GO:0005829]		16	0	39.305	81	8.5	6.4	7.5	11.8	O80734	O80734	1472	At2g46900	Expressed protein
255312728881836	257731647491455	25860294342041	262471160888672			carbohydrate binding [GO:0030246]	3	0.0084881	1.5389	9	2.3	2.3	2.3	2.3	O80735	O80735	1473	JAL16	Jacalin-related lectin 16
NaN	NaN	217852840423584	263603649139404	dephosphorylation [GO:0016311]	cytoplasm [GO:0005737];cytosol [GO:0005829]	transferase activity, transferring glycosyl groups [GO:0016757]	21	0	86.786	45	0	0	0.9	2.2	O80738	O80738	1474	TPS10	Probable alpha,alpha-trehalose-phosphate synthase [UDP-forming] 10
30893669128418	309122085571289	309211044311523	309339618682861	cell redox homeostasis [GO:0045454];pollen tube growth [GO:0009860];pollen tube guidance [GO:0010183];regulation of pollen tube growth [GO:0080092];response to cadmium ion [GO:0046686]	cytosol [GO:0005829];nucleus [GO:0005634]	protein-disulfide reductase activity [GO:0047134]	56	0	323.31	746	59.9	56.1	57.1	51.2	O80763	O80763	1475	At1g60420	Probable nucleoredoxin 1
244207897186279	244035358428955	NaN	239707946777344	oxidation-reduction process [GO:0055114]	cytosol [GO:0005829];mitochondrial matrix [GO:0005759];mitochondrion [GO:0005739];nucleus [GO:0005634];respirasome [GO:0070469]	acyl binding [GO:0000035];acyl carrier activity [GO:0000036];cobalt ion binding [GO:0050897];metal ion binding [GO:0046872]	2	0	5.5189	11	14.3	14.3	0	14.3	O80800	O80800	1478	MTACP2	Acyl carrier protein 2, mitochondrial
264898052215576	262319297790527	263715572357178	266204490661621	double fertilization forming a zygote and endosperm [GO:0009567]	cytoplasm [GO:0005737];nucleus [GO:0005634]	transferase activity, transferring acyl groups other than amino-acyl groups [GO:0016747]	12	0	12.226	47	16.4	16.7	16.4	16	O80816	O80816	1479	GLAUCE	HXXXD-type acyl-transferase family protein
24966796875	256960678100586	256034851074219	253823184967041		nucleus [GO:0005634]	AT DNA binding [GO:0003680]	3	0	24.407	17	6.9	12.4	12.4	4	O80834	O80834	1480	AHL9	AT-hook motif nuclear-localized protein 9
320323295593262	319662647247314	319786930084229	319762706756592	GDP-mannose biosynthetic process [GO:0009298];L-ascorbic acid biosynthetic process [GO:0019853];mannose metabolic process [GO:0006013];protein N-linked glycosylation [GO:0006487];protein targeting to ER [GO:0045047]	cytosol [GO:0005829]	phosphomannomutase activity [GO:0004615]	32	0	323.31	616	76.8	76.8	77.2	76.8	O80840	O80840	1481	PMM	Phosphomannomutase
303628578186035	306273193359375	306799297332764	302925262451172	SRP-dependent cotranslational protein targeting to membrane [GO:0006614]	chloroplast stroma [GO:0009570];chloroplast thylakoid membrane [GO:0009535]	GTP binding [GO:0005525];metal ion binding [GO:0046872]	22	0	150.93	208	54.4	50	49.5	50	O80842	O80842	1482	CPFTSY	Cell division protein FtsY homolog, chloroplastic
245487499237061	252369556427002	253434009552002	210482654571533	tRNA methylation [GO:0030488]	nucleus [GO:0005634];tRNA (m1A) methyltransferase complex [GO:0031515]	translation initiation factor activity [GO:0003743]	16	0	100.3	62	10.1	13	2.9	3.6	O80846	O80846	1483	At2g45730	tRNA (adenine(58)-N(1))-methyltransferase non-catalytic subunit TRM6
349073715209961	348363914489746	348758239746094	347686538696289	defense response [GO:0006952];defense response to bacterium [GO:0042742];glutathione metabolic process [GO:0006749];response to cadmium ion [GO:0046686];response to zinc ion [GO:0010043];toxin catabolic process [GO:0009407]	apoplast [GO:0048046];chloroplast [GO:0009507];chloroplast stroma [GO:0009570];cytoplasm [GO:0005737];cytosol [GO:0005829];peroxisome [GO:0005777];plasma membrane [GO:0005886];plasmodesma [GO:0009506];thylakoid [GO:0009579];vacuole [GO:0005773]	copper ion binding [GO:0005507];glutathione binding [GO:0043295];glutathione peroxidase activity [GO:0004602];glutathione transferase activity [GO:0004364]	35	0	323.31	964	77.7	80	65.1	80	O80852	O80852	1484	GSTF9	Glutathione S-transferase F9
23608850479126	229283008575439	NaN	251016941070557		chloroplast [GO:0009507];peroxisome [GO:0005777];plasma membrane [GO:0005886]		10	0	202.44	45	19.5	8.5	0	32.3	O80858	O80858	1485	At2g30930	Expressed protein
28600736618042	283557777404785	286592845916748	285285415649414	response to zinc ion [GO:0010043]	chloroplast [GO:0009507];cytosol [GO:0005829];endoplasmic reticulum [GO:0005783]	hydrolase activity [GO:0016787];transferase activity, transferring acyl groups other than amino-acyl groups [GO:0016747]	18	0	72.341	134	41.4	45.2	41.8	40.2	O80889;A0A1P8AZM5	O80889	1486	At2g32520	Alpha/beta-Hydrolases superfamily protein
268870449066162	271782608032227	268926124572754	268825035095215	spliceosomal complex assembly [GO:0000245]	catalytic step 2 spliceosome [GO:0071013];U2 snRNP [GO:0005686];U2-type prespliceosome [GO:0071004]	nucleic acid binding [GO:0003676];zinc ion binding [GO:0008270]	12	0	76.852	73	26.4	22.7	17	26.4	O80897	O80897	1487	At2g32600	At2g32600/T26B15.16
274742126464844	287539482116699	294386692047119	291113777160645	signal transduction [GO:0007165]		ATP binding [GO:0005524];protein serine/threonine kinase activity [GO:0004674]	2	0.007276	1.5743	23	4.2	2.1	2.1	2.1	O80902	O80902	1488	CIPK22	CBL-interacting serine/threonine-protein kinase 22
271141624450684	26973445892334	27202751159668	27178071975708	protein transport to vacuole involved in ubiquitin-dependent protein catabolic process via the multivesicular body sorting pathway [GO:0043328]	cytoplasm [GO:0005737];early endosome [GO:0005769];early endosome membrane [GO:0031901];multivesicular body [GO:0005771];plasma membrane [GO:0005886]	ubiquitin binding [GO:0043130]	10	0	90.949	90	14.9	11.5	9.5	9.8	O80910	O80910	1489	TOL6	TOM1-like protein 6
311649494171143	311444301605225	313035621643066	312916469573975	hydrogen peroxide catabolic process [GO:0042744];response to oxidative stress [GO:0006979]	extracellular region [GO:0005576];vacuole [GO:0005773]	heme binding [GO:0020037];metal ion binding [GO:0046872];peroxidase activity [GO:0004601]	15	0	182.51	77	2	9.2	5.2	6.3	O80912	O80912	1490	PER23	Peroxidase 23
247921829223633	248971691131592	246158828735352	2341969871521	vesicle-mediated transport [GO:0016192]	cytosol [GO:0005829];endoplasmic reticulum [GO:0005783];Golgi apparatus [GO:0005794];nucleus [GO:0005634]	GTPase activator activity [GO:0005096];metal ion binding [GO:0046872]	18	0	181.4	55	16.7	16.9	9.4	16.2	O80925	O80925	1492	AGD7	ADP-ribosylation factor GTPase-activating protein AGD7
336846809387207	335030860900879	334095802307129	333587493896484	defense response to bacterium [GO:0042742]	apoplast [GO:0048046];chloroplast [GO:0009507];chloroplast stroma [GO:0009570];endoplasmic reticulum [GO:0005783];thylakoid [GO:0009579]	copper ion binding [GO:0005507]	38	0	323.31	711	69.2	70.2	68.9	69.8	O80934	O80934	1494	At2g37660	Uncharacterized protein At2g37660, chloroplastic
271684436798096	270432262420654	256740322113037	261519565582275	defense response [GO:0006952];defense response to bacterium [GO:0042742];defense response to oomycetes [GO:0002229];response to salicylic acid [GO:0009751]	endoplasmic reticulum [GO:0005783];integral component of membrane [GO:0016021];plasma membrane [GO:0005886]	ATP binding [GO:0005524];carbohydrate binding [GO:0030246];transmembrane receptor protein serine/threonine kinase activity [GO:0004675]	6	0	5.134	14	7.4	7.1	7.1	5.9	O80939	O80939	1495	LECRK41	L-type lectin-domain containing receptor kinase IV.1
243134746551514	NaN	244751262664795	NaN	carbohydrate metabolic process [GO:0005975]	chloroplast [GO:0009507];Golgi apparatus [GO:0005794];integral component of membrane [GO:0016021]	acetyltransferase activity [GO:0016407]	1	0.001487	2.2814	1	2.7	0	2.7	0	O80940	O80940	1496	TBL15	Protein trichome birefringence-like 15
294527168273926	296639232635498	296424961090088	295887088775635	oxidation-reduction process [GO:0055114];response to cadmium ion [GO:0046686];response to cold [GO:0009409];response to salt stress [GO:0009651];response to toxic substance [GO:0009636];response to water deprivation [GO:0009414]	cytosol [GO:0005829];endoplasmic reticulum [GO:0005783]	alcohol dehydrogenase (NADP+) activity [GO:0008106];alditol:NADP+ 1-oxidoreductase activity [GO:0004032];aldo-keto reductase (NADP) activity [GO:0004033];NADP+ binding [GO:0070401];oxidoreductase activity [GO:0016491];steroid dehydrogenase activity [GO:0016229]	28	0	148.96	332	55	59.2	53.4	54.7	O80944	O80944	1497	AKR4C8	Aldo-keto reductase family 4 member C8
224775123596191	221085929870605	NaN	221510925292969			carbohydrate binding [GO:0030246]	68	0	323.31	572	2	12.2	0	12.4	O80950	O80950	1498	JAL22	Jacalin-related lectin 22
33913761138916	338711471557617	338061676025391	338323402404785	glycine decarboxylation via glycine cleavage system [GO:0019464]	apoplast [GO:0048046];chloroplast [GO:0009507];chloroplast envelope [GO:0009941];cytosol [GO:0005829];glycine cleavage complex [GO:0005960];mitochondrion [GO:0005739];vacuole [GO:0005773]	ATP binding [GO:0005524];glycine binding [GO:0016594];glycine dehydrogenase (decarboxylating) activity [GO:0004375];pyridoxal phosphate binding [GO:0030170]	91	0	323.31	1273	66.6	62.8	66	66.3	O80988	O80988	1501	GLDP2	Glycine dehydrogenase (decarboxylating) 2, mitochondrial
258411026000977	240135040283203	272626647949219	269048347473145	iron-sulfur cluster assembly [GO:0016226]	CIA complex [GO:0097361];nucleus [GO:0005634]		14	0	43.29	49	3.1	4	3.1	4.5	O80990	O80990	1502	CIA1	Protein CIA1
NaN	251005706787109	NaN	250971183776855	regulation of seed germination [GO:0010029]	ubiquitin ligase complex [GO:0000151]	protein heterodimerization activity [GO:0046982];ubiquitin binding [GO:0043130];ubiquitin-protein transferase activity [GO:0004842];zinc ion binding [GO:0008270]	5	0	4.4788	12	0	5.2	0	8.8	O80996	O80996	1504	BRIZ2	BRAP2 RING ZnF UBP domain-containing protein 2
313063907623291	313937644958496	312208385467529	313387832641602	isopentenyl diphosphate biosynthetic process, methylerythritol 4-phosphate pathway [GO:0019288];terpenoid biosynthetic process [GO:0016114]	chloroplast [GO:0009507];chloroplast stroma [GO:0009570]	4-(cytidine 5'-diphospho)-2-C-methyl-D-erythritol kinase activity [GO:0050515];ATP binding [GO:0005524]	28	0	221.35	378	41.5	41.5	41.3	36.8	O81014	O81014	1509	ISPE	4-diphosphocytidyl-2-C-methyl-D-erythritol kinase, chloroplastic
272449951171875	272607822418213	271927223205566	26726634979248	phosphatidylethanolamine biosynthetic process [GO:0006646];phospholipid biosynthetic process [GO:0008654]	plasma membrane [GO:0005886]	ATP binding [GO:0005524];ethanolamine kinase activity [GO:0004305]	20	0	42.362	148	14.7	20.9	21.1	17.1	O81024	O81024	1510	EMB1187	Probable ethanolamine kinase
25588436126709	263674144744873	246310653686523	262957916259766	ketone body biosynthetic process [GO:0046951];leucine catabolic process [GO:0006552];lipid metabolic process [GO:0006629]	mitochondrial matrix [GO:0005759];mitochondrion [GO:0005739]	hydroxymethylglutaryl-CoA lyase activity [GO:0004419];metal ion binding [GO:0046872]	12	0	50.874	79	3.4	6.2	6.4	6.4	O81027	O81027	1511	HMGCL	Hydroxymethylglutaryl-CoA lyase, mitochondrial
212702503204346	NaN	NaN	213224010467529	transcription, DNA-templated [GO:0006351]	host cell nucleus [GO:0042025];RNA polymerase I complex [GO:0005736];RNA polymerase II, core complex [GO:0005665];RNA polymerase III complex [GO:0005666];RNA polymerase IV complex [GO:0000418]	DNA binding [GO:0003677];DNA-directed 5'-3' RNA polymerase activity [GO:0003899]	3	0	6.0968	15	4.9	0	0	4.9	O81098	O81098	1516	NRPB5A	DNA-directed RNA polymerases II and IV subunit 5A
NaN	230642929077148	NaN	231991348266602	mRNA cis splicing, via spliceosome [GO:0045292];mRNA splicing, via spliceosome [GO:0000398];regulation of alternative mRNA splicing, via spliceosome [GO:0000381];RNA splicing [GO:0008380]	cytoplasm [GO:0005737];nuclear speck [GO:0016607];nucleolus [GO:0005730];nucleus [GO:0005634];plasma membrane [GO:0005886];spliceosomal complex [GO:0005681]	mRNA binding [GO:0003729];RNA binding [GO:0003723];zinc ion binding [GO:0008270]	6	0	11.983	25	3.5	10.5	6.5	10.5	O81126	O81126	1517	RSZ22	Serine/arginine-rich splicing factor RSZ22
297865467071533	297184429168701	300499897003174	298551044464111	proteasomal protein catabolic process [GO:0010498];proteasomal ubiquitin-independent protein catabolic process [GO:0010499];proteasome-mediated ubiquitin-dependent protein catabolic process [GO:0043161];response to zinc ion [GO:0010043]	cytoplasm [GO:0005737];cytosol [GO:0005829];nucleus [GO:0005634];plastid [GO:0009536];proteasome complex [GO:0000502];proteasome core complex [GO:0005839];proteasome core complex, alpha-subunit complex [GO:0019773];vacuolar membrane [GO:0005774]	endopeptidase activity [GO:0004175];threonine-type endopeptidase activity [GO:0004298]	27	0	300.79	307	47.6	55.3	50.4	58.1	O81146	O81146	1519	PAA1	Proteasome subunit alpha type-6-A
281908416748047	282266025543213	281845169067383	283264598846436	proteasomal protein catabolic process [GO:0010498];proteasomal ubiquitin-independent protein catabolic process [GO:0010499];proteasome-mediated ubiquitin-dependent protein catabolic process [GO:0043161]	cytoplasm [GO:0005737];cytosol [GO:0005829];cytosolic ribosome [GO:0022626];mitochondrion [GO:0005739];nucleus [GO:0005634];polysomal ribosome [GO:0042788];proteasome complex [GO:0000502];proteasome core complex [GO:0005839];proteasome core complex, alpha-subunit complex [GO:0019773]	endopeptidase activity [GO:0004175];structural constituent of ribosome [GO:0003735];threonine-type endopeptidase activity [GO:0004298]	25	0	98.474	126	39.8	49.2	50.4	46.3	O81147	O81147	1520	PAA2	Proteasome subunit alpha type-6-B
292051544189453	293674049377441	293053684234619	293486824035645	proteasomal protein catabolic process [GO:0010498];proteasomal ubiquitin-independent protein catabolic process [GO:0010499];proteasome-mediated ubiquitin-dependent protein catabolic process [GO:0043161];response to cadmium ion [GO:0046686]	cytoplasm [GO:0005737];cytosol [GO:0005829];cytosolic ribosome [GO:0022626];mitochondrion [GO:0005739];nucleus [GO:0005634];proteasome complex [GO:0000502];proteasome core complex [GO:0005839];proteasome core complex, alpha-subunit complex [GO:0019773];vacuole [GO:0005773]	endopeptidase activity [GO:0004175];threonine-type endopeptidase activity [GO:0004298]	24	0	323.31	324	58	51.6	50	43.2	O81148	O81148	1521	PAC1	Proteasome subunit alpha type-4-A
281880130767822	279331455230713	27936014175415	280887126922607	proteasomal protein catabolic process [GO:0010498];proteasomal ubiquitin-independent protein catabolic process [GO:0010499];proteasome-mediated ubiquitin-dependent protein catabolic process [GO:0043161];response to cadmium ion [GO:0046686]	cytoplasm [GO:0005737];cytosol [GO:0005829];cytosolic ribosome [GO:0022626];nucleus [GO:0005634];plasma membrane [GO:0005886];polysomal ribosome [GO:0042788];proteasome complex [GO:0000502];proteasome core complex [GO:0005839];proteasome core complex, alpha-subunit complex [GO:0019773];vacuolar membrane [GO:0005774]	endopeptidase activity [GO:0004175];ribonuclease activity [GO:0004540];structural constituent of ribosome [GO:0003735];threonine-type endopeptidase activity [GO:0004298]	15	0	323.31	194	38.8	48.9	40.5	45.1	O81149	O81149	1522	PAE1	Proteasome subunit alpha type-5-A
309152755737305	30970006942749	309572620391846	308480453491211	defense response to bacterium [GO:0042742];embryo development ending in seed dormancy [GO:0009793];response to zinc ion [GO:0010043]	cytosol [GO:0005829];mitochondrial matrix [GO:0005759];mitochondrion [GO:0005739]	copper ion binding [GO:0005507];manganese ion binding [GO:0030145];metal ion binding [GO:0046872];superoxide dismutase activity [GO:0004784]	22	0	323.31	337	66.2	73.6	56.7	74.9	O81235	O81235	1524	MSD1	Superoxide dismutase [Mn] 1, mitochondrial
257660274505615	260228023529053	264548473358154	26350399017334	protein import into chloroplast stroma [GO:0045037];protein targeting to chloroplast [GO:0045036]	chloroplast [GO:0009507];chloroplast envelope [GO:0009941];chloroplast outer membrane [GO:0009707];cytosol [GO:0005829];integral component of membrane [GO:0016021];plastid [GO:0009536];TOC-TIC supercomplex I [GO:0061927]	chaperone binding [GO:0051087];G protein-coupled receptor activity [GO:0004930];GTP binding [GO:0005525];GTPase activity [GO:0003924];metal ion binding [GO:0046872];ribosomal small subunit binding [GO:0043024];transmembrane signaling receptor activity [GO:0004888]	10	0	16.709	36	4.4	4.3	4	5	O81283	O81283	1525	TOC159	Translocase of chloroplast 159, chloroplastic
NaN	242352027893066	237492942810059	NaN		vacuolar membrane [GO:0005774];vacuole [GO:0005773]		3	0	15.386	21	6.6	14.4	14.4	6.6	O81296	O81296	1526	At4g02370	AT4g02370 protein
273118133544922	278778896331787	274953365325928	276280498504639		peroxisome [GO:0005777]	hydrolase activity [GO:0016787]	16	0	71.618	118	24.7	23.1	17.6	24.7	O81299	O81299	1527	At4g02340	AT4g02340 protein
NaN	24720775604248	NaN	24063570022583	embryo development ending in seed dormancy [GO:0009793]			6	0	8.6655	16	0	1.9	0	2.5	O81325	O81325	1528	F6N15.2	ARM repeat superfamily protein
248855323791504	255142440795898	24865140914917	NaN	cell wall organization [GO:0071555];cellulose catabolic process [GO:0030245]	extracellular region [GO:0005576]	cellulase activity [GO:0008810]	3	0	7.1676	19	2.3	2.3	2.3	0	O81416;O49296	O81416	1529	At4g02290	Endoglucanase 17
301550884246826	302903289794922	299736385345459	303653621673584	photoinhibition [GO:0010205];response to abscisic acid [GO:0009737];response to cold [GO:0009409]	chloroplast [GO:0009507];chloroplast stroma [GO:0009570];chloroplast thylakoid [GO:0009534];chloroplast thylakoid membrane [GO:0009535];cytosol [GO:0005829];nucleus [GO:0005634];plastoglobule [GO:0010287];stromule [GO:0010319];thylakoid [GO:0009579];thylakoid lumen [GO:0031977]		20	0	193.81	241	51.6	49.1	50.9	44.3	O81439	O81439	1530	PAP1	Probable plastid-lipid-associated protein 1, chloroplastic
249797172546387	253672962188721	258300189971924	259662246704102	chromatin organization [GO:0006325];regulation of transcription, DNA-templated [GO:0006355]	cytosol [GO:0005829];nucleus [GO:0005634]	metal ion binding [GO:0046872];methylated histone binding [GO:0035064]	7	0	9.0397	47	14.5	8.6	16.1	20	O81488	O81488	1531	AL4	PHD finger protein ALFIN-LIKE 4
253087959289551	256647872924805	248954582214355	252739105224609		anchored component of membrane [GO:0031225];anchored component of plasma membrane [GO:0046658]	electron transfer activity [GO:0009055]	2	0	8.5995	13	8.6	11.2	11.2	19.8	O81500	O81500	1534	At5g26330	At5g26330
329828453063965	328808288574219	328455238342285	328818893432617	actin filament bundle assembly [GO:0051017];actin filament capping [GO:0051693];actin filament severing [GO:0051014];actin polymerization or depolymerization [GO:0008154]	actin cytoskeleton [GO:0015629];cytoplasm [GO:0005737];cytosol [GO:0005829]	actin filament binding [GO:0051015]	100	0	323.31	1550	65.3	65.6	61.9	65.5	O81644	O81644	1537	VLN2	Villin-2
319028606414795	31995906829834	319509506225586	320079154968262	actin filament bundle assembly [GO:0051017];actin filament capping [GO:0051693];actin filament severing [GO:0051014];actin polymerization or depolymerization [GO:0008154]	actin cytoskeleton [GO:0015629];actin filament [GO:0005884];cytoplasm [GO:0005737];cytosol [GO:0005829]	actin filament binding [GO:0051015]	84	0	323.31	1042	61.1	62.7	59.9	61.2	O81645	O81645	1538	VLN3	Villin-3
276174392700195	273643608093262	272534065246582	27213451385498	response to abscisic acid [GO:0009737]	plasma membrane [GO:0005886];vacuole [GO:0005773]	magnesium-dependent protein serine/threonine phosphatase activity [GO:0004724];metal ion binding [GO:0046872];protein serine/threonine phosphatase activity [GO:0004722]	24	0	108.31	136	22.5	15.5	15.2	13.2	O81716	O81716	1539	PPC4-2	Probable protein phosphatase 2C 21
250329246520996	251525955200195	252910537719727	251502342224121	carbohydrate metabolic process [GO:0005975]	cell wall [GO:0005618]	lyase activity [GO:0016829];polygalacturonase activity [GO:0004650]	3	0	88.977	11	1.6	1.6	1.6	1.6	O81746	O81746	1540	At4g23500	Pectin lyase-like superfamily protein
267021331787109	264464797973633	265544986724854	267544269561768	methylation [GO:0032259];peptidyl-diphthamide biosynthetic process from peptidyl-histidine [GO:0017183]		diphthine synthase activity [GO:0004164]	8	0	75.479	92	30	30	18.8	21.7	O81769	O81769	1541	At4g31790	Probable diphthine methyl ester synthase
252976818084717	267551898956299	229382247924805	267236423492432	auxin homeostasis [GO:0010252];camalexin biosynthetic process [GO:0010120];positive regulation of camalexin biosynthetic process [GO:1901183];response to auxin [GO:0009733]	cytoplasm [GO:0005737]	acid-amino acid ligase activity [GO:0016881];indole-3-acetic acid amido synthetase activity [GO:0010279]	24	0	88.532	56	1.5	1.5	4.9	1.5	O81829	O81829	1543	GH3.5	Indole-3-acetic acid-amido synthetase GH3.5
290358257293701	287873401641846	290969772338867	290554046630859	aspartate family amino acid biosynthetic process [GO:0009067];homoserine biosynthetic process [GO:0009090];lysine biosynthetic process via diaminopimelate [GO:0009089];methionine biosynthetic process [GO:0009086];threonine biosynthetic process [GO:0009088]	chloroplast [GO:0009507];chloroplast stroma [GO:0009570]	aspartate kinase activity [GO:0004072];ATP binding [GO:0005524];homoserine dehydrogenase activity [GO:0004412];NADP binding [GO:0050661]	51	0	150.42	267	30	25.1	27.5	28.5	O81852	O81852	1544	AKHSDH2	Bifunctional aspartokinase/homoserine dehydrogenase 2, chloroplastic
284087600708008	282715072631836	281551837921143	282961406707764	chitin catabolic process [GO:0006032];polysaccharide catabolic process [GO:0000272];response to abscisic acid [GO:0009737];response to jasmonic acid [GO:0009753];response to salt stress [GO:0009651]	cell wall [GO:0005618];extracellular region [GO:0005576];secretory vesicle [GO:0099503]	chitin binding [GO:0008061];chitinase activity [GO:0004568];endochitinase activity [GO:0008843];exochitinase activity [GO:0035885]	21	0	323.31	251	23.5	30.9	30.9	21.1	O81862	O81862	1545	ChiC	Class V chitinase
272835674285889	272153053283691	274618587493896	272723979949951		chloroplast thylakoid lumen [GO:0009543]	peptidyl-prolyl cis-trans isomerase activity [GO:0003755]	4	0	22.769	38	17.5	17.5	17.5	17.5	O81864	O81864	1546	FKBP17-1	Peptidyl-prolyl cis-trans isomerase FKBP17-1, chloroplastic
250356121063232	257970180511475	253832416534424	252229881286621	response to insect [GO:0009625]		carbohydrate binding [GO:0030246];proteoglycan binding [GO:0043394]	5	0	47.59	34	5.3	15.9	5.3	12.6	O81865	O81865	1547	PP2A1	Protein PHLOEM PROTEIN 2-LIKE A1
298097267150879	300437469482422	295304584503174	297127799987793	galactose metabolic process [GO:0006012];L-ascorbic acid biosynthetic process [GO:0019853]	cytosol [GO:0005829]	L-galactose dehydrogenase activity [GO:0010349];oxidoreductase activity [GO:0016491]	14	0	119.72	194	41.4	44.5	44.5	36.4	O81884	O81884	1548	LGALDH	L-galactose dehydrogenase
249350814819336	253669967651367	252024707794189	250791606903076	protein phosphorylation [GO:0006468];recognition of pollen [GO:0048544]	integral component of membrane [GO:0016021];plasma membrane [GO:0005886];plasmodesma [GO:0009506];vacuole [GO:0005773]	ATP binding [GO:0005524];carbohydrate binding [GO:0030246];protein serine/threonine kinase activity [GO:0004674];transmembrane receptor protein serine/threonine kinase activity [GO:0004675];ubiquitin protein ligase binding [GO:0031625]	5	0	10.476	12	2.8	4.1	4.1	2.8	O81905	O81905	1550	SD18	Receptor-like serine/threonine-protein kinase SD1-8
295237083435059	296803150177002	295030937194824	29594165802002	cellular copper ion homeostasis [GO:0006878];copper ion transport [GO:0006825];response to cadmium ion [GO:0046686]	chloroplast [GO:0009507];cytosol [GO:0005829]	copper chaperone activity [GO:0016531];protein domain specific binding [GO:0019904]	28	0	323.31	376	86	92.6	90.1	91.7	O82089	O82089	1552	CCH	Copper transport protein CCH
NaN	NaN	250027313232422	244458179473877	defense response to insect [GO:0002213];response to copper ion [GO:0046688];response to insect [GO:0009625];response to jasmonic acid [GO:0009753];response to oxidative stress [GO:0006979];response to wounding [GO:0009611]	cytosolic ribosome [GO:0022626];vacuole [GO:0005773]	acid phosphatase activity [GO:0003993];nutrient reservoir activity [GO:0045735]	6	0	3.1264	9	12.5	12.5	12.8	12.5	O82122	O82122	1553	VSP2	Vegetative storage protein 2
257785892486572	NaN	263066253662109	264043006896973	cytidine to uridine editing [GO:0016554];mitochondrial mRNA modification [GO:0080156];mRNA processing [GO:0006397]	endoplasmic reticulum [GO:0005783];mitochondrion [GO:0005739]	protein dimerization activity [GO:0046983];protein homodimerization activity [GO:0042803]	6	0	14.931	25	9.9	0	9.9	3.4	O82169	O82169	1554	MORF6	Multiple organellar RNA editing factor 6, mitochondrial
276308975219727	295858287811279	283535919189453	284416198730469	glycine decarboxylation via glycine cleavage system [GO:0019464]	glycine cleavage complex [GO:0005960];mitochondrion [GO:0005739]	ATP binding [GO:0005524]	11	0	131.9	128	15.4	17.3	11.5	24.4	O82179	O82179	1555	GDH2	Glycine cleavage system H protein 2, mitochondrial
248386039733887	245080299377441	244676837921143	269567089080811	malate metabolic process [GO:0006108];pyruvate metabolic process [GO:0006090]	chloroplast [GO:0009507];cytosol [GO:0005829];mitochondrion [GO:0005739]	malate dehydrogenase (decarboxylating) (NAD+) activity [GO:0004471];malate dehydrogenase (decarboxylating) (NADP+) activity [GO:0004473];malic enzyme activity [GO:0004470];metal ion binding [GO:0046872];NAD binding [GO:0051287];oxaloacetate decarboxylase activity [GO:0008948]	15	0	6.3178	27	7.9	7.9	9.8	9	O82191	O82191	1556	NADP-ME1	NADP-dependent malic enzyme 1
228345489501953	235842838287354	225514736175537	232540740966797				2	0	3.7361	4	4.2	4.2	4.2	4.2	O82202	O82202	1559	At2g19780	Leucine-rich repeat (LRR) family protein
263902778625488	252981357574463	262406539916992	258197269439697	adaxial/abaxial pattern specification [GO:0009955];leaf morphogenesis [GO:0009965];translation [GO:0006412]	cell wall [GO:0005618];chloroplast [GO:0009507];cytoplasm [GO:0005737];cytosolic large ribosomal subunit [GO:0022625];cytosolic ribosome [GO:0022626];mitochondrion [GO:0005739];nucleolus [GO:0005730];nucleoplasm [GO:0005654];nucleus [GO:0005634];plasma membrane [GO:0005886];plasmodesma [GO:0009506]	structural constituent of ribosome [GO:0003735]	27	0	323.31	248	9.1	15.4	23.8	15.4	O82204	O82204	1560	RPL28A	60S ribosomal protein L28-1
265976142883301	268624248504639	26680700302124	268111515045166	protein import into chloroplast stroma [GO:0045037]	chloroplast [GO:0009507];chloroplast envelope [GO:0009941];chloroplast stroma [GO:0009570];chloroplast thylakoid membrane [GO:0009535];vacuole [GO:0005773]	DNA binding [GO:0003677]	8	0	35.214	41	19.2	25.3	17.6	25.8	O82230	O82230	1562	STIC2	Nucleoid-associated protein At2g24020, chloroplastic
261679458618164	253493881225586	254230365753174	251522083282471		cytosol [GO:0005829];eukaryotic translation initiation factor 4F complex [GO:0016281]	mRNA binding [GO:0003729];translation initiation factor activity [GO:0003743]	20	0	32.371	53	8.6	5.9	3.2	7.2	O82233	O82233	1563	EIF(ISO)4G2	Eukaryotic translation initiation factor isoform 4G-2
274460067749023	27832555770874	272063884735107	274239025115967	chloroplast organization [GO:0009658];leaf development [GO:0048366];ribosome disassembly [GO:0032790]	chloroplast [GO:0009507];vacuole [GO:0005773]	ribosome binding [GO:0043022];translation initiation factor activity [GO:0003743]	15	0	46.452	87	28.5	24.7	23.7	31.4	O82234	O82234	1564	IF3-2	Translation initiation factor IF3-2, chloroplastic
31133508682251	312420673370361	314038524627686	314628028869629		cytosol [GO:0005829];Golgi apparatus [GO:0005794];plasma membrane [GO:0005886];vacuole [GO:0005773]	hydrolase activity [GO:0016787]	15	0	234.31	267	68.5	77.8	77.8	77.8	O82240	O82240	1565	At2g47710	Adenine nucleotide alpha hydrolases-like superfamily protein
318933429718018	318748893737793	31827787399292	319326248168945	chloroplast organization [GO:0009658];photosystem II repair [GO:0010206];protein catabolic process [GO:0030163];proteolysis [GO:0006508]	chloroplast [GO:0009507];chloroplast envelope [GO:0009941];chloroplast stroma [GO:0009570];chloroplast stromal thylakoid [GO:0009533];chloroplast thylakoid membrane [GO:0009535];cytosol [GO:0005829]	serine-type endopeptidase activity [GO:0004252]	33	0	323.31	458	41.8	44.2	44.6	49.9	O82261	O82261	1566	DEGP2	Protease Do-like 2, chloroplastic
2757737159729	271543159484863	276288833618164	27329029083252				22	0	98.497	129	16.7	12	23.3	11.5	O82263	O82263	1567	At2g47960	At2g47960/T9J23.10
28826416015625	291086387634277	290742378234863	290378170013428	proteasome-mediated ubiquitin-dependent protein catabolic process [GO:0043161];ubiquitin-dependent protein catabolic process [GO:0006511]	cytosol [GO:0005829];nucleus [GO:0005634]	ubiquitin binding [GO:0043130];ubiquitin protein ligase binding [GO:0031625]	16	0	136.6	189	34.9	24.7	28.6	22.8	O82264	O82264	1568	At2g47970	NPL4-like protein 2
260807266235352	261926097869873	260235214233398	268052577972412	cell division [GO:0051301];meiotic sister chromatid cohesion, centromeric [GO:0051754];monopolar spindle attachment to meiosis I kinetochore [GO:0051455];sister chromatid cohesion [GO:0007062]	chromatin [GO:0000785];chromosome [GO:0005694];cohesin complex [GO:0008278];nucleus [GO:0005634]	chromatin binding [GO:0003682]	6	0	8.7245	37	0.9	0.9	0.9	0.9	O82265	O82265	1569	SCC3	Sister-chromatid cohesion protein 3
297941589355469	292731761932373	284379348754883	291917362213135	phosphorylation [GO:0016310]	chloroplast [GO:0009507]		19	0	163.7	153	21.2	34.1	37.2	31.8	O82290	O82290	1571	SKL2	Probable inactive shikimate kinase like 2, chloroplastic
328646697998047	327595252990723	328619728088379	328014717102051		chloroplast [GO:0009507];chloroplast thylakoid [GO:0009534];chloroplast thylakoid membrane [GO:0009535];endoplasmic reticulum [GO:0005783];plastid [GO:0009536];plastoglobule [GO:0010287];thylakoid [GO:0009579]		23	0	323.31	404	54.8	54.8	50.8	54.8	O82291	O82291	1572	PAP3	Probable plastid-lipid-associated protein 3, chloroplastic
324295959472656	324797401428223	325870780944824	32412914276123		chloroplast [GO:0009507];chloroplast stroma [GO:0009570];cytoplasm [GO:0005737];endoplasmic reticulum [GO:0005783];nucleus [GO:0005634];ribonucleoprotein complex [GO:1990904];thylakoid [GO:0009579]	mRNA binding [GO:0003729]	25	0	323.31	376	57.8	57.8	53.2	57.8	O82299	O82299	1573	At2g35410	Putative chloroplast RNA binding protein
264152393341064	265588397979736	268085765838623	262131004333496			3'-5' exonuclease activity [GO:0008408];RNA binding [GO:0003723]	10	0	14.741	47	15.2	7.3	6.2	10	O82306	O82306	1574	At2g25910	3'-5' exonuclease domain-containing protein / K homology domain-containing protein / KH domain-containing protein
291001148223877	280481204986572	276226139068604	286252994537354		chloroplast [GO:0009507];vacuole [GO:0005773]		16	0	89.101	102	24.2	27.2	24.2	24.2	O82314	O82314	1575	At2g25830	Probable transcriptional regulatory protein At2g25830
234190540313721	NaN	282127113342285	269503803253174	response to desiccation [GO:0009269]	cytosol [GO:0005829];plasma membrane [GO:0005886]		10	0	64.711	58	13.3	0	7.2	7.2	O82355	O82355	1577	At2g46140	Desiccation-related protein At2g46140
253357563018799	25155029296875	251765689849854	249960632324219	pantothenate biosynthetic process [GO:0015940]	mitochondrion [GO:0005739]	3-methyl-2-oxobutanoate hydroxymethyltransferase activity [GO:0003864];magnesium ion binding [GO:0000287]	5	0	3.9632	8	8.4	5.2	9.5	14.1	O82357	O82357	1578	KPHMT1	3-methyl-2-oxobutanoate hydroxymethyltransferase 1, mitochondrial
255533275604248	225855922698975	245176734924316	NaN		intracellular membrane-bounded organelle [GO:0043231]	daphnetin 3-O-glucosyltransferase activity [GO:0102360];flavonol 3-O-glucosyltransferase activity [GO:0047893];flavonol 7-O-beta-glucosyltransferase activity [GO:0033836];myricetin 3-O-glucosyltransferase activity [GO:0102425];quercetin 3'-O-glucosyltransferase activity [GO:0080045];quercetin 7-O-glucosyltransferase activity [GO:0080044];UDP-glucosyltransferase activity [GO:0035251];UDP-glycosylt…	30	0	181.75	136	2.7	3.3	4	0	O82381	O82381	1579	UGT71C1	Flavonol 3-O-glucosyltransferase UGT71C1
NaN	NaN	238208465576172	238646697998047		intracellular membrane-bounded organelle [GO:0043231]	daphnetin 3-O-glucosyltransferase activity [GO:0102360];flavonol 3-O-glucosyltransferase activity [GO:0047893];myricetin 3-O-glucosyltransferase activity [GO:0102425];quercetin 3-O-glucosyltransferase activity [GO:0080043];UDP-glycosyltransferase activity [GO:0008194]	13	0	16.853	34	0	0	4.9	2.4	O82383	O82383	1581	UGT71D1	UDP-glycosyltransferase 71D1
29931568145752	320878410339355	315669689178467	310428352355957	response to vitamin B1 [GO:0010266];thiamine biosynthetic process [GO:0009228];thiamine diphosphate biosynthetic process [GO:0009229]	chloroplast [GO:0009507];chloroplast stroma [GO:0009570];plastid [GO:0009536]	4 iron, 4 sulfur cluster binding [GO:0051539];carbon-carbon lyase activity [GO:0016830];iron-sulfur cluster binding [GO:0051536];metal ion binding [GO:0046872];protein domain specific binding [GO:0019904]	43	0	323.31	331	42.9	45.7	40.5	41.6	O82392	O82392	1582	THIC	Phosphomethylpyrimidine synthase, chloroplastic
305889759063721	307061901092529	307139110565186	307804260253906	glyoxylate cycle [GO:0006097];malate metabolic process [GO:0006108];regulation of fatty acid beta-oxidation [GO:0031998];regulation of photorespiration [GO:0080093];tricarboxylic acid cycle [GO:0006099]	chloroplast [GO:0009507];cytoplasm [GO:0005737];peroxisome [GO:0005777]	L-malate dehydrogenase activity [GO:0030060]	27	0	323.31	496	55.1	57.1	62.1	55.1	O82399	O82399	1583	PMDH1	Malate dehydrogenase 1, peroxisomal
284849281311035	281381931304932	281385822296143	279157028198242	histidyl-tRNA aminoacylation [GO:0006427]	chloroplast [GO:0009507];mitochondrion [GO:0005739]	ATP binding [GO:0005524];histidine-tRNA ligase activity [GO:0004821]	18	0	23.989	111	13.6	18.3	16	19.8	O82413	O82413	1584	At3g46100	Histidine--tRNA ligase, chloroplastic/mitochondrial
290944881439209	290405902862549	290108127593994	292004146575928	glutaminyl-tRNA aminoacylation [GO:0006425];glutamyl-tRNA aminoacylation [GO:0006424]	cytosol [GO:0005829];plastid [GO:0009536]	ATP binding [GO:0005524];glutamate-tRNA ligase activity [GO:0004818];glutamine-tRNA ligase activity [GO:0004819]	62	0	323.31	394	36.7	33.8	29.1	33.7	O82462	O82462	1585	At5g26710	Glutamate--tRNA ligase, cytoplasmic
241731796264648	246670913696289	245559616088867	247552165985107		cytoplasm [GO:0005737];cytosol [GO:0005829];mitochondrion [GO:0005739];plastid [GO:0009536]	aldehyde-lyase activity [GO:0016832]	9	0	55.066	52	8.1	7.5	7.5	12.3	O82487	O82487	1587	T12H20.10	Phosphoenolpyruvate carboxylase family protein
268786506652832	271642284393311	268233528137207	270562076568604		chloroplast [GO:0009507];cytosol [GO:0005829]	ribosome binding [GO:0043022];translation initiation factor activity [GO:0003743]	7	0	28.209	48	34.8	22.7	34	46.1	O82499	O82499	1590	At4g11175	Translation initiation factor IF-1, chloroplastic
297267322540283	299708995819092	299776020050049	300685596466064	chloroplast fission [GO:0010020];organelle fission [GO:0048285]	chloroplast [GO:0009507];chloroplast stroma [GO:0009570];chloroplast thylakoid [GO:0009534];chloroplast thylakoid membrane [GO:0009535];cytoplasm [GO:0005737];endoplasmic reticulum [GO:0005783]	GTP binding [GO:0005525];GTPase activity [GO:0003924];protein self-association [GO:0043621]	19	0	304.54	205	41.4	42.1	46.2	41.4	O82533	O82533	1592	FTSZ2-1	Cell division protein FtsZ homolog 2-1, chloroplastic
266972351074219	257689056396484	256270618438721	262420902252197	phosphate-containing compound metabolic process [GO:0006796]	cytosol [GO:0005829];nucleoplasm [GO:0005654]	inorganic diphosphatase activity [GO:0004427];magnesium ion binding [GO:0000287]	17	0	16.971	35	25	20.8	19	22.7	O82597	O82597	1593	PPA5	Soluble inorganic pyrophosphatase 5
256733322143555	259180030822754	256927471160889	256554546356201	positive regulation of DNA repair [GO:0045739]	BRCA1-A complex [GO:0070531];BRISC complex [GO:0070552]		6	0	3.3492	23	9.8	12.5	9.8	12.9	O82638	O82638	1594	At4g32960	At4g32960
299273357391357	299359302520752	299099922180176	300296001434326	defense response [GO:0006952];intracellular signal transduction [GO:0035556];negative regulation of defense response [GO:0031348];protein dephosphorylation [GO:0006470]	cytoplasm [GO:0005737];nucleus [GO:0005634];plasma membrane [GO:0005886]	kinase binding [GO:0019900];MAP kinase tyrosine phosphatase activity [GO:0033550];protein tyrosine phosphatase activity [GO:0004725]	27	0	280.14	367	58.5	53.2	48.2	59.4	O82656	O82656	1596	PTP1	Protein-tyrosine-phosphatase PTP1
333736038208008	334954795837402	33456600189209	335043869018555	response to cadmium ion [GO:0046686];succinyl-CoA metabolic process [GO:0006104];tricarboxylic acid cycle [GO:0006099]	mitochondrion [GO:0005739];succinate-CoA ligase complex [GO:0042709]	ATP binding [GO:0005524];copper ion binding [GO:0005507];magnesium ion binding [GO:0000287];succinate-CoA ligase (ADP-forming) activity [GO:0004775];succinate-CoA ligase (GDP-forming) activity [GO:0004776]	82	0	323.31	1506	86.5	85.5	86.2	86.5	O82662	O82662	1597	At2g20420	Succinate--CoA ligase [ADP-forming] subunit beta, mitochondrial
314969081878662	315330142974854	315058307647705	314848613739014	mitochondrial electron transport, succinate to ubiquinone [GO:0006121];tricarboxylic acid cycle [GO:0006099]	cell wall [GO:0005618];mitochondrial respiratory chain complex II, succinate dehydrogenase complex (ubiquinone) [GO:0005749];mitochondrion [GO:0005739];plastid [GO:0009536];respiratory chain complex II [GO:0045273]	ATP binding [GO:0005524];cobalt ion binding [GO:0050897];electron transfer activity [GO:0009055];flavin adenine dinucleotide binding [GO:0050660];oxidoreductase activity [GO:0016491];succinate dehydrogenase (ubiquinone) activity [GO:0008177];succinate dehydrogenase activity [GO:0000104]	49	0	323.31	847	59.8	47.5	57.1	54.1	O82663	O82663	1598	SDH1-1	Succinate dehydrogenase [ubiquinone] flavoprotein subunit 1, mitochondrial
267093830108643	267636985778809	265427112579346	268370151519775	pollen tube growth [GO:0009860];root hair cell tip growth [GO:0048768]	cytoplasm [GO:0005737];cytosol [GO:0005829];nucleus [GO:0005634]	metal ion binding [GO:0046872];protein serine/threonine phosphatase activity [GO:0004722]	12	0	19.177	44	16.7	27.2	17.6	12.3	O82734	O82734	1599	TOPP8	Serine/threonine-protein phosphatase PP1 isozyme 8
309716529846191	310448551177979	308742294311523	310100536346436	regulation of gene expression [GO:0010468]	cytoplasm [GO:0005737];cytosol [GO:0005829];vacuole [GO:0005773]	mRNA binding [GO:0003729]	24	0	186.76	360	32.4	36.7	36.7	37.5	O82762	O82762	1600	At2g25970	F17H15.1/F17H15.1
302408180236816	30257661819458	302749767303467	302055969238281	histidine biosynthetic process [GO:0000105]	chloroplast [GO:0009507];chloroplast stroma [GO:0009570];cytosol [GO:0005829]	ATP binding [GO:0005524];phosphoribosyl-AMP cyclohydrolase activity [GO:0004635];phosphoribosyl-ATP diphosphatase activity [GO:0004636]	25	0	103.6	207	50.9	50.9	34.5	55.9	O82768	O82768	1601	HISN2	Histidine biosynthesis bifunctional protein hisIE, chloroplastic
25099609375	251350440979004	252146377563477	NaN	carbohydrate metabolic process [GO:0005975];glucosinolate catabolic process [GO:0019762];response to salt stress [GO:0009651]	endoplasmic reticulum [GO:0005783]	beta-glucosidase activity [GO:0008422]	23	0	48.717	94	6.6	2.3	4	2.3	O82772	O82772	1602	BGLU25	Probable inactive beta-glucosidase 25
282002735137939	285790634155273	280130252838135	284746398925781	histidine biosynthetic process [GO:0000105];tryptophan biosynthetic process [GO:0000162]	chloroplast [GO:0009507];cytoplasm [GO:0005737]	1-(5-phosphoribosyl)-5-[(5-phosphoribosylamino)methylideneamino]imidazole-4-carboxamide isomerase activity [GO:0003949]	15	0	57.869	115	20.1	31.6	29.3	19.4	O82782	O82782	1603	HISN3	1-(5-phosphoribosyl)-5-[(5-phosphoribosylamino)methylideneamino] imidazole-4-carboxamide isomerase, chloroplastic
309459381103516	309187622070313	308514003753662	306955280303955	methylation [GO:0032259];SNARE complex assembly [GO:0035493]	chloroplast [GO:0009507];chloroplast stroma [GO:0009570];cytosol [GO:0005829];endosome [GO:0005768];lytic vacuole [GO:0000323]	methyltransferase activity [GO:0008168];SNARE binding [GO:0000149]	28	0	168.1	320	70.5	59.3	66.4	67.2	O82790	O82790	1604	At2g45990	AT2G45990 protein
285739097595215	284830837249756	283842220306396	284078693389893	dephosphorylation [GO:0016311];embryo development ending in seed dormancy [GO:0009793];L-serine biosynthetic process [GO:0006564];L-serine metabolic process [GO:0006563];pollen development [GO:0009555];root development [GO:0048364];sulfur amino acid metabolic process [GO:0000096]	chloroplast [GO:0009507];cytoplasm [GO:0005737];plastid [GO:0009536]	calcium ion binding [GO:0005509];magnesium ion binding [GO:0000287];phosphatase activity [GO:0016791];phosphoserine phosphatase activity [GO:0004647]	14	0	40.134	167	33.6	34.9	28.8	42	O82796	O82796	1605	PSP	Phosphoserine phosphatase, chloroplastic
273896064758301	279027671813965	279444732666016	280244846343994				9	0	58.514	56	27.5	33.3	35.3	34.3	O82808	O82808	1606	At2g25950	At2g25950
322852668762207	322432327270508	322428894042969	323538970947266	aromatic amino acid family biosynthetic process [GO:0009073];chorismate biosynthetic process [GO:0009423]	chloroplast [GO:0009507];chloroplast stroma [GO:0009570]	3-phosphoshikimate 1-carboxyvinyltransferase activity [GO:0003866]	38	0	323.31	841	50.2	48.5	55.2	44.8	P05466	P05466	1608	At2g45300	3-phosphoshikimate 1-carboxyvinyltransferase, chloroplastic
28055534362793	280300750732422	269947471618652	275259685516357	cellular response to hypoxia [GO:0071456];formaldehyde catabolic process [GO:0046294];positive regulation of cellular response to hypoxia [GO:1900039];response to abscisic acid [GO:0009737];response to cadmium ion [GO:0046686];response to caffeine [GO:0031000];response to cold [GO:0009409];response to estradiol [GO:0032355];response to flooding [GO:0009413];response to hydrogen peroxide [GO:00425…	cytosol [GO:0005829];plasma membrane [GO:0005886]	alcohol dehydrogenase (NAD+) activity [GO:0004022];alcohol dehydrogenase activity, zinc-dependent [GO:0004024];nucleotide binding [GO:0000166];protein homodimerization activity [GO:0042803];S-(hydroxymethyl)glutathione dehydrogenase activity [GO:0051903];zinc ion binding [GO:0008270]	25	0	106.72	117	24.3	18.7	10.3	16.1	P06525	P06525	1609	ADH1	Alcohol dehydrogenase class-P
281399974822998	284508514404297	287390842437744	287872161865234	ATP synthesis coupled proton transport [GO:0015986]	chloroplast [GO:0009507];chloroplast envelope [GO:0009941];chloroplast thylakoid [GO:0009534];chloroplast thylakoid membrane [GO:0009535];plastid [GO:0009536];proton-transporting ATP synthase complex, catalytic core F(1) [GO:0045261];thylakoid [GO:0009579]	ATP binding [GO:0005524];proton-transporting ATP synthase activity, rotational mechanism [GO:0046933]	11	0	145.3	133	74.2	74.2	68.2	87.9	P09468	P09468	1610	atpE	ATP synthase epsilon chain, chloroplastic
265695266723633	263932437896729	263646621704102	265432720184326				9	0	18.939	71	17.6	15	17.6	14.2	P0C895	P0C895	1611	At2g30105	LRR repeats and ubiquitin-like domain-containing protein At2g30105
NaN	237222366333008	238835296630859	236786327362061		mitochondrion [GO:0005739]		19	0	45.838	84	0	2.1	3.8	2.1	P0C896	P0C896	1612	At3g02650	Pentatricopeptide repeat-containing protein At3g02650, mitochondrial
297636203765869	299543533325195	301142120361328	299179801940918	developmental growth [GO:0048589];root hair elongation [GO:0048767]	cell wall [GO:0005618];cytoplasm [GO:0005737];cytoskeleton [GO:0005856];cytosol [GO:0005829];endoplasmic reticulum [GO:0005783];plasma membrane [GO:0005886];plasmodesma [GO:0009506]	ATP binding [GO:0005524];structural constituent of cytoskeleton [GO:0005200]	46	0	323.31	340	69.5	65.5	63.7	70	P0CJ46	P0CJ46	1614	ACT1	Actin-1
306431503295898	305635643005371	305781269073486	305691890716553	fatty acid beta-oxidation [GO:0006635];fatty acid beta-oxidation using acyl-CoA oxidase [GO:0033540];lipid homeostasis [GO:0055088];medium-chain fatty acid metabolic process [GO:0051791]	extracellular region [GO:0005576];peroxisome [GO:0005777]	acyl-CoA oxidase activity [GO:0003997];FAD binding [GO:0071949];fatty acid binding [GO:0005504];flavin adenine dinucleotide binding [GO:0050660]	48	0	323.31	610	48.9	42.5	38.5	43.9	P0CZ23	P0CZ23	1615	ACX3	Acyl-coenzyme A oxidase 3, peroxisomal
3135373878479	318292636871338	NaN	NaN		nucleus [GO:0005634]	DNA binding [GO:0003677]	1	0.0052403	1.8238	15	2	2	0	0	P0DH85	P0DH85	1616	REM10	B3 domain-containing protein REM10
238509082794189	NaN	232035312652588	NaN	calcium-mediated signaling [GO:0019722]	cytoplasm [GO:0005737];plasma membrane [GO:0005886]	calcium ion binding [GO:0005509]	8	0	3.5258	4	43.6	28.9	51	31.5	P0DH95	P0DH95	1617	CAM1	Calmodulin-1
361352233886719	36126708984375	360857543945313	36062744140625	translation [GO:0006412];translational elongation [GO:0006414]	mitochondrion [GO:0005739];plasma membrane [GO:0005886];plasmodesma [GO:0009506]	GTP binding [GO:0005525];GTPase activity [GO:0003924];translation elongation factor activity [GO:0003746]	73	0	323.31	3511	73.5	78	78.6	78.6	P0DH99;Q6NLF6	P0DH99	1618	A1	Elongation factor 1-alpha 1
261299247741699	26536958694458	25852933883667	265800342559814				10	0	17.831	24	13.6	1.6	5.5	1.6	P0DI06	P0DI06	1619	At1g25211	F-box/kelch-repeat protein At1g25211
269645519256592	265120754241943	268173866271973	272140083312988	histidine biosynthetic process [GO:0000105]	chloroplast stroma [GO:0009570]	histidinol-phosphate transaminase activity [GO:0004400];pyridoxal phosphate binding [GO:0030170]	10	0	8.5709	31	12.2	10.1	10.1	10.3	P0DI07	P0DI07	1620	HISN6B	Histidinol-phosphate aminotransferase 2, chloroplastic
219367523193359	NaN	208323669433594	NaN	terpenoid biosynthetic process [GO:0016114]	chloroplast [GO:0009507]	1,8-cineole synthase activity [GO:0102313];magnesium ion binding [GO:0000287];terpene synthase activity [GO:0010333]	46	0	323.31	268	4.5	0	1.3	0	P0DI76	P0DI76	1621	TPS27	1,8-cineole synthase 1, chloroplastic
347304954528809	346209678649902	350325164794922	347979774475098	dephosphorylation [GO:0016311];photorespiration [GO:0009853]	chloroplast [GO:0009507]	phosphatase activity [GO:0016791];phosphoglycolate phosphatase activity [GO:0008967]	40	0	323.31	1286	61.6	64.1	64.1	64.1	P0DKC4	P0DKC4	1624	PGLP1B	Phosphoglycolate phosphatase 1B, chloroplastic
299056968688965	310664443969727	311129684448242	310696487426758			oxidoreductase activity [GO:0016491]	15	0	166.86	231	56	63.5	63.5	63.5	P0DKI3	P0DKI3	1625	At1g07440	Tropinone reductase homolog At1g07440
286671237945557	288199768066406	290972537994385	289120788574219	microgametogenesis [GO:0055046];mRNA splicing, via spliceosome [GO:0000398];plant ovule development [GO:0048481];pollen development [GO:0009555];pollen germination [GO:0009846]	nucleus [GO:0005634]	nucleic acid binding [GO:0003676]	52	0	323.31	358	11	14.7	19.3	17.5	P0DKL6	P0DKL6	1626	SAP130B	Spliceosome-associated protein 130 B
262678871154785	NaN	25455883026123	256200847625732		nucleoplasm [GO:0005654];nucleus [GO:0005634]	dioxygenase activity [GO:0051213];iron ion binding [GO:0005506];L-ascorbic acid binding [GO:0031418];oxidoreductase activity, acting on paired donors, with incorporation or reduction of molecular oxygen [GO:0016705]	4	0	3.4003	6	2.8	0	2.8	2.8	P0DO23	P0DO23	1627	CP2	2-oxoglutarate and iron-dependent oxygenase domain-containing protein CP2
359742126464844	359070358276367	359672927856445	360267601013184	chloroplast ribulose bisphosphate carboxylase complex assembly [GO:0110102];photorespiration [GO:0009853];photosynthesis [GO:0015979];reductive pentose-phosphate cycle [GO:0019253];response to blue light [GO:0009637];response to cold [GO:0009409];response to far red light [GO:0010218];response to red light [GO:0010114]	apoplast [GO:0048046];chloroplast [GO:0009507];chloroplast envelope [GO:0009941];chloroplast membrane [GO:0031969];chloroplast stroma [GO:0009570];chloroplast thylakoid membrane [GO:0009535];cytosolic ribosome [GO:0022626];mitochondrion [GO:0005739];thylakoid [GO:0009579];thylakoid lumen [GO:0031977]	copper ion binding [GO:0005507];monooxygenase activity [GO:0004497];ribulose-bisphosphate carboxylase activity [GO:0016984]	28	0	323.31	1020	64.4	64.4	64.4	64.4	P10795	P10795	1628	RBCS-1A	Ribulose bisphosphate carboxylase small chain 1A, chloroplastic
370762672424316	369063415527344	369757690429688	368625602722168	photorespiration [GO:0009853];reductive pentose-phosphate cycle [GO:0019253];response to blue light [GO:0009637];response to far red light [GO:0010218];response to red light [GO:0010114]	apoplast [GO:0048046];chloroplast [GO:0009507];chloroplast envelope [GO:0009941];chloroplast membrane [GO:0031969];chloroplast stroma [GO:0009570];plastid [GO:0009536];thylakoid [GO:0009579]	monooxygenase activity [GO:0004497];protein domain specific binding [GO:0019904];ribulose-bisphosphate carboxylase activity [GO:0016984]	32	0	323.31	1901	68.5	68.5	68.5	68.5	P10796	P10796	1629	RBCS-1B	Ribulose bisphosphate carboxylase small chain 1B, chloroplastic
372849388122559	372920722961426	37363655090332	372331008911133	defense response to bacterium [GO:0042742];leaf senescence [GO:0010150];response to cold [GO:0009409];response to jasmonic acid [GO:0009753];response to light stimulus [GO:0009416]	apoplast [GO:0048046];cell wall [GO:0005618];chloroplast [GO:0009507];chloroplast envelope [GO:0009941];chloroplast stroma [GO:0009570];chloroplast thylakoid membrane [GO:0009535];Golgi apparatus [GO:0005794];nucleus [GO:0005634];plastoglobule [GO:0010287];stromule [GO:0010319];thylakoid [GO:0009579]	ADP binding [GO:0043531];ATP binding [GO:0005524];enzyme regulator activity [GO:0030234];ribulose-1,5-bisphosphate carboxylase/oxygenase activator activity [GO:0046863]	61	0	323.31	3789	85.7	85.7	85.7	85.7	P10896	P10896	1630	RCA	Ribulose bisphosphate carboxylase/oxygenase activase, chloroplastic
324059066772461	324536094665527	323203392028809	324333801269531	nitrate assimilation [GO:0042128];nitric oxide biosynthetic process [GO:0006809];response to herbicide [GO:0009635];response to light stimulus [GO:0009416];response to symbiotic fungus [GO:0009610]	cytosol [GO:0005829];nucleus [GO:0005634];plasma membrane [GO:0005886];vacuole [GO:0005773]	FAD binding [GO:0071949];heme binding [GO:0020037];molybdenum ion binding [GO:0030151];molybdopterin cofactor binding [GO:0043546];nitrate reductase (NADH) activity [GO:0009703];nitrate reductase (NADPH) activity [GO:0050464];nitrate reductase activity [GO:0008940]	89	0	323.31	930	62.5	73.5	61.8	64.2	P11035	P11035	1631	NIA2	Nitrate reductase [NADH] 2
267358283996582	262837085723877	263002853393555	265919208526611	microtubule cytoskeleton organization [GO:0000226];microtubule-based process [GO:0007017];mitotic cell cycle [GO:0000278]	cytoplasm [GO:0005737];cytosol [GO:0005829];microtubule [GO:0005874];nucleus [GO:0005634];plasma membrane [GO:0005886]	GTP binding [GO:0005525];GTPase activity [GO:0003924];structural constituent of cytoskeleton [GO:0005200]	22	0	52.869	56	35.3	36.7	33.6	36.7	P11139	P11139	1632	TUBA1	Tubulin alpha-1 chain
284756832122803	284168739318848	283938255310059	28549072265625		chloroplast [GO:0009507];chloroplast thylakoid membrane [GO:0009535];mitochondrion [GO:0005739];thylakoid [GO:0009579];thylakoid lumen [GO:0031977]	copper ion binding [GO:0005507];electron transfer activity [GO:0009055]	6	0	205.98	75	42.1	42.1	18.1	18.1	P11490	P11490	1633	PETE	Plastocyanin minor isoform, chloroplastic
325256118774414	3255078125	324981689453125	324395866394043	actin filament bundle assembly [GO:0051017];actin filament capping [GO:0051693];ATP metabolic process [GO:0046034];glucose mediated signaling pathway [GO:0010255];negative regulation of actin filament depolymerization [GO:0030835];proton transmembrane transport [GO:1902600];regulation of transcription by RNA polymerase II [GO:0006357];response to cadmium ion [GO:0046686]	Golgi apparatus [GO:0005794];mitochondrion [GO:0005739];nucleus [GO:0005634];plasma membrane [GO:0005886];plasmodesma [GO:0009506];protein-containing complex [GO:0032991];proton-transporting V-type ATPase, V1 domain [GO:0033180];vacuolar membrane [GO:0005774];vacuole [GO:0005773]	actin filament binding [GO:0051015];ATP binding [GO:0005524];hydrolase activity [GO:0016787]	48	0	323.31	1421	75.9	75.7	76.3	71.2	P11574	P11574	1634	VHA-B1	V-type proton ATPase subunit B1
25582103729248	25888578414917	257262954711914	252075805664063	nitrate assimilation [GO:0042128];nitric oxide biosynthetic process [GO:0006809];response to herbicide [GO:0009635];response to light stimulus [GO:0009416]	cytosol [GO:0005829]	FAD binding [GO:0071949];heme binding [GO:0020037];molybdenum ion binding [GO:0030151];molybdopterin cofactor binding [GO:0043546];nitrate reductase (NADH) activity [GO:0009703];nitrate reductase (NADPH) activity [GO:0050464];nitrate reductase activity [GO:0008940]	37	0	142.28	166	9.7	8.2	8.2	7	P11832	P11832	1636	NIA1	Nitrate reductase [NADH] 1
288981037139893	NaN	244788951873779	NaN	microtubule cytoskeleton organization [GO:0000226];microtubule-based process [GO:0007017];mitotic cell cycle [GO:0000278];response to light stimulus [GO:0009416];unidimensional cell growth [GO:0009826]	cytoplasm [GO:0005737];microtubule [GO:0005874];vacuole [GO:0005773]	GTP binding [GO:0005525];GTPase activity [GO:0003924];structural constituent of cytoskeleton [GO:0005200]	39	0	323.31	82	36.9	36.2	37.4	36.2	P12411	P12411	1637	TUBB1	Tubulin beta-1 chain
225808620452881	20974702835083	218916721343994	204380683898926	auxin polar transport [GO:0009926];flavonoid biosynthetic process [GO:0009813];regulation of anthocyanin biosynthetic process [GO:0031540];response to auxin [GO:0009733];response to gravity [GO:0009629];response to jasmonic acid [GO:0009753];response to oxidative stress [GO:0006979];response to UV-B [GO:0010224];response to wounding [GO:0009611]	endoplasmic reticulum [GO:0005783];nucleus [GO:0005634];plant-type vacuole membrane [GO:0009705]	naringenin-chalcone synthase activity [GO:0016210]	44	0	323.31	492	9.6	4.6	4.3	4.6	P13114;Q9FJF8	P13114	1638	CHS	Chalcone synthase
319524440765381	318798637390137	319298763275146	320192642211914	indoleacetic acid biosynthetic process [GO:0009684];response to oxidative stress [GO:0006979];tryptophan biosynthetic process [GO:0000162]	chloroplast [GO:0009507];chloroplast stroma [GO:0009570];cytoplasm [GO:0005737];plasma membrane [GO:0005886]	protein domain specific binding [GO:0019904];tryptophan synthase activity [GO:0004834]	39	0	323.31	616	71.3	64.3	71.9	65.3	P14671	P14671	1639	TSB1	Tryptophan synthase beta chain 1, chloroplastic
322496604919434	3230029296875	322184448242188	32244140625	chlorophyll biosynthetic process [GO:0015995];photosynthesis [GO:0015979]	cell wall [GO:0005618];chloroplast [GO:0009507];chloroplast stroma [GO:0009570];cytosol [GO:0005829];magnesium chelatase complex [GO:0010007]	ATP binding [GO:0005524];ATPase activity [GO:0016887];magnesium chelatase activity [GO:0016851]	37	0	188.24	439	55.7	50.2	56.6	52.6	P16127	P16127	1642	CHLI1	Magnesium-chelatase subunit ChlI-1, chloroplastic
232642765045166	230561122894287	230179958343506	231934146881104	plastid translation [GO:0032544]	chloroplast [GO:0009507];chloroplast envelope [GO:0009941];chloroplast stroma [GO:0009570];chloroplast thylakoid [GO:0009534];cytosolic small ribosomal subunit [GO:0022627];mitochondrion [GO:0005739];plastid small ribosomal subunit [GO:0000312]	rRNA binding [GO:0019843];structural constituent of ribosome [GO:0003735]	3	0.00057056	2.6483	5	6	12.8	6	6	P16180	P16180	1643	RPS17	30S ribosomal protein S17, chloroplastic
NaN	208009662628174	207397480010986	NaN	translation [GO:0006412]	cell wall [GO:0005618];cytosol [GO:0005829];cytosolic ribosome [GO:0022626];cytosolic small ribosomal subunit [GO:0022627];plasmodesma [GO:0009506]	mRNA binding [GO:0003729];rRNA binding [GO:0019843];structural constituent of ribosome [GO:0003735]	33	0	214.12	177	0	14.4	6.9	0	P16181	P16181	1644	RPS11A	40S ribosomal protein S11-1
310722713470459	311245403289795	305439758300781	308908462524414	photosynthetic acclimation [GO:0009643];photosynthetic electron transport chain [GO:0009767]	chloroplast [GO:0009507]	2 iron, 2 sulfur cluster binding [GO:0051537];electron transfer activity [GO:0009055];metal ion binding [GO:0046872]	6	0	323.31	137	60.8	57.4	60.8	60.8	P16972	P16972	1645	FD2	Ferredoxin-2, chloroplastic
190257778167725	223760509490967	227535839080811	22091423034668	ribosomal large subunit assembly [GO:0000027];translation [GO:0006412]	cell wall [GO:0005618];cytosol [GO:0005829];cytosolic large ribosomal subunit [GO:0022625];cytosolic ribosome [GO:0022626];nucleolus [GO:0005730];nucleus [GO:0005634];plasma membrane [GO:0005886];plasmodesma [GO:0009506];polysomal ribosome [GO:0042788];vacuolar membrane [GO:0005774];vacuole [GO:0005773]	mRNA binding [GO:0003729];RNA binding [GO:0003723];structural constituent of ribosome [GO:0003735]	93	0	323.31	919	8.5	12.3	11.3	6.7	P17094	P17094	1646	ARP1	60S ribosomal protein L3-1
297830047607422	297170372009277	297458782196045	29749080657959	one-carbon metabolic process [GO:0006730];S-adenosylmethionine biosynthetic process [GO:0006556]	cell wall [GO:0005618];cytosol [GO:0005829];extracellular exosome [GO:0070062];nucleolus [GO:0005730];plasmodesma [GO:0009506]	ATP binding [GO:0005524];copper ion binding [GO:0005507];methionine adenosyltransferase activity [GO:0004478]	61	0	323.31	544	85.2	75.1	81.4	82.7	P17562	P17562	1647	SAM2	S-adenosylmethionine synthase 2
293777618408203	293735790252686	291960582733154	292972793579102	isoleucine biosynthetic process [GO:0009097];response to herbicide [GO:0009635];valine biosynthetic process [GO:0009099]	acetolactate synthase complex [GO:0005948];chloroplast [GO:0009507];chloroplast stroma [GO:0009570]	acetolactate synthase activity [GO:0003984];flavin adenine dinucleotide binding [GO:0050660];magnesium ion binding [GO:0000287];thiamine pyrophosphate binding [GO:0030976]	35	0	323.31	324	32.8	26	24.8	26.7	P17597	P17597	1648	ALS	Acetolactate synthase, chloroplastic
328147087097168	328451690673828	329511070251465	328479347229004	chloroplast organization [GO:0009658];leaf development [GO:0048366];translational elongation [GO:0006414]	apoplast [GO:0048046];chloroplast [GO:0009507];chloroplast envelope [GO:0009941];chloroplast nucleoid [GO:0042644];chloroplast stroma [GO:0009570];chloroplast thylakoid [GO:0009534];chloroplast thylakoid membrane [GO:0009535];nucleolus [GO:0005730];nucleus [GO:0005634];plastid [GO:0009536]	GTP binding [GO:0005525];GTPase activity [GO:0003924];translation elongation factor activity [GO:0003746]	44	0	323.31	725	65.5	62.8	63.4	52.3	P17745	P17745	1649	TUFA	Elongation factor Tu, chloroplastic
294816036224365	301280479431152	272931613922119	260583553314209	transcription by RNA polymerase II [GO:0006366]	plasmodesma [GO:0009506];RNA polymerase II, core complex [GO:0005665];vacuole [GO:0005773]	DNA binding [GO:0003677];DNA-directed 5'-3' RNA polymerase activity [GO:0003899];metal ion binding [GO:0046872]	49	0	100.46	172	1.6	1.6	1.1	1.6	P18616	P18616	1650	NRPB1	DNA-directed RNA polymerase II subunit RPB1
273015575408936	27665599822998	273929653167725	276527366638184	cell wall macromolecule catabolic process [GO:0016998];chitin catabolic process [GO:0006032];defense response to fungus [GO:0050832];killing of cells of other organism [GO:0031640];plant-type hypersensitive response [GO:0009626];polysaccharide catabolic process [GO:0000272];response to cadmium ion [GO:0046686]	cytosol [GO:0005829];secretory vesicle [GO:0099503];vacuolar membrane [GO:0005774];vacuole [GO:0005773]	chitin binding [GO:0008061];chitinase activity [GO:0004568]	19	0	323.31	252	12.2	29.3	14	22.1	P19171	P19171	1651	CHI-B	Basic endochitinase B
374726638793945	37478630065918	374734230041504	374189529418945	ATP synthesis coupled proton transport [GO:0015986];defense response to fungus, incompatible interaction [GO:0009817];response to cold [GO:0009409]	cell wall [GO:0005618];chloroplast [GO:0009507];chloroplast ATP synthase complex [GO:0009544];chloroplast stroma [GO:0009570];chloroplast thylakoid [GO:0009534];chloroplast thylakoid membrane [GO:0009535];plastid [GO:0009536];plastoglobule [GO:0010287];proton-transporting ATP synthase complex, catalytic core F(1) [GO:0045261];stromule [GO:0010319];thylakoid [GO:0009579];thylakoid lumen [GO:003197…	ATP binding [GO:0005524];proton-transporting ATP synthase activity, rotational mechanism [GO:0046933];zinc ion binding [GO:0008270]	68	0	323.31	3959	98.6	98.6	98.6	98.6	P19366	P19366	1653	atpB	ATP synthase subunit beta, chloroplastic
309051933288574	306602535247803	306378917694092	306281890869141	carbohydrate metabolic process [GO:0005975];citrate metabolic process [GO:0006101];response to cadmium ion [GO:0046686];tricarboxylic acid cycle [GO:0006099]	cell wall [GO:0005618];chloroplast [GO:0009507];cytosol [GO:0005829];mitochondrial matrix [GO:0005759];mitochondrion [GO:0005739]	ATP binding [GO:0005524];citrate (Si)-synthase activity [GO:0004108];zinc ion binding [GO:0008270]	42	0	323.31	711	51.5	50.6	50.4	48.7	P20115	P20115	1655	CSY4	Citrate synthase 4, mitochondrial
294363288879395	296245498657227	296508884429932	293955211639404	cell wall pectin metabolic process [GO:0052546];cell wall thickening [GO:0052386];phosphate-containing compound metabolic process [GO:0006796]	cytosol [GO:0005829];nucleoplasm [GO:0005654]	inorganic diphosphatase activity [GO:0004427];magnesium ion binding [GO:0000287]	22	0	100.97	182	67.4	63.8	65.6	60.6	P21216	P21216	1657	PPA2	Soluble inorganic pyrophosphatase 2
330021095275879	320932998657227	323764266967773	321332015991211	chlorophyll biosynthetic process [GO:0015995];photosynthesis [GO:0015979];response to ethylene [GO:0009723]	chloroplast [GO:0009507];chloroplast envelope [GO:0009941];chloroplast outer membrane [GO:0009707];chloroplast thylakoid [GO:0009534];chloroplast thylakoid membrane [GO:0009535];cytosol [GO:0005829]	protein domain specific binding [GO:0019904];protochlorophyllide reductase activity [GO:0016630]	44	0	323.31	624	60.6	61.6	70.3	66.1	P21218	P21218	1658	PORB	Protochlorophyllide reductase B, chloroplastic
339787788391113	340039520263672	339629249572754	339839668273926	chloroplast organization [GO:0009658];embryo development ending in seed dormancy [GO:0009793];protein folding [GO:0006457];protein refolding [GO:0042026]	apoplast [GO:0048046];chloroplast [GO:0009507];chloroplast envelope [GO:0009941];chloroplast stroma [GO:0009570];cytosolic ribosome [GO:0022626];mitochondrion [GO:0005739];peroxisome [GO:0005777];thylakoid [GO:0009579]	ATP binding [GO:0005524]	64	0	323.31	1711	69.8	72.7	69.1	70.1	P21238	P21238	1659	CPN60A1	Chaperonin 60 subunit alpha 1, chloroplastic
351328506469727	35004581451416	349886283874512	350799255371094	cell death [GO:0008219];chaperone cofactor-dependent protein refolding [GO:0051085];protein folding [GO:0006457];protein refolding [GO:0042026];response to cold [GO:0009409];systemic acquired resistance [GO:0009627]	apoplast [GO:0048046];chloroplast [GO:0009507];chloroplast envelope [GO:0009941];chloroplast stroma [GO:0009570];cytosolic ribosome [GO:0022626];nucleus [GO:0005634];plasma membrane [GO:0005886];stromule [GO:0010319]	ATP binding [GO:0005524];protein domain specific binding [GO:0019904]	102	0	323.31	2387	82.8	84	89.2	90	P21240	P21240	1660	CPN60B1	Chaperonin 60 subunit beta 1, chloroplastic
[truncated: 3,153 more rows]
