# Supplementary material for: Proteome Dynamics of Persulfidation in Leaf Tissue under Light/Dark Conditions and Carbon Deprivation
Source: Antioxidants (Basel). 2023 Mar 23;12(4):789. doi: 10.3390/antiox12040789 (PMC10135009; doi:10.3390/antiox12040789)
Supplement: Supplementary file 1 [file antioxidants-12-00789-s001.zip › Dataset S3.xlsx]

## Sheet: S3_EN_2 REPLICAS
				Dataset 3. Identified proteins in the sample set 3 (S3) in at least two independent replicas
LFQ intensity S31	LFQ intensity S32	LFQ intensity S33	LFQ intensity S34	Gene ontology (biological process)	Gene ontology (cellular component)	Gene ontology (molecular function)	Peptides	Q-value	Score	MS/MS count	Sequence coverage S31 [%]	Sequence coverage S32 [%]	Sequence coverage S33 [%]	Sequence coverage S34 [%]	Sequence coverage S41 [%]	Sequence coverage S42 [%]	Sequence coverage S43 [%]	Sequence coverage S44 [%]	Protein IDs	Majority protein IDs	id	Gene name	Protein name	Carbamidomethyl (C) site positions	Carbamyl (K) site positions	CianoBiotin(C) site positions	Deamidation (N) site positions	MethylTio(C) site positions	MSBT(C) site positions	Oxidation (M) site positions	Sulfide(C) site positions
#!{Type}E	E	E	E	C	C	C	N	N	N	N	N	N	N	N	N	N	N	N	T	T	T	T	T	M	M	M	M	M	M	M	M
#!{C:Group1}LFQ intensity S3	LFQ intensity S3	LFQ intensity S3	LFQ intensity S3
290758190155029	289784202575684	291041202545166	290995388031006	photosynthesis [GO:0015979]	extrinsic component of membrane [GO:0019898];photosystem II oxygen evolving complex [GO:0009654]	calcium ion binding [GO:0005509]	17	0	66.223	100	24.8	32.1	29.2	23.8	36.5	33.7	34.9	39.4	A0A178U9N5	A0A178U9N5	1	PPD5	PsbP domain protein (Mog1/PsbP/DUF1795-like photosystem II reaction center PsbP family protein)		136;195;205;247;253;279;283
274648208618164	273786525726318	274546604156494	27739953994751	cell wall modification [GO:0042545];pectin catabolic process [GO:0045490]		aspartyl esterase activity [GO:0045330];enzyme inhibitor activity [GO:0004857];pectinesterase activity [GO:0030599]	9	0	106.78	60	13.7	20.1	18	17	17	15.4	22.5	15.3	A0A178UA07	A0A178UA07	2	At5g09760	Plant invertase/pectin methylesterase inhibitor superfamily	84;142;270;389	271;446;535
267616710662842	254651012420654	262776222229004	259536914825439				9	0	31.697	50	43.7	33.3	47	36.1	39.3	30.1	42.1	38.3	A0A178UE66	A0A178UE66	3	PBS2	Cysteine and histidine-rich domain-containing protein RAR1	6;7;23;61;135	8;37;58
211260967254639	218269481658936	215598754882813	224476852416992		cytosol [GO:0005829]	5-diphosphoinositol pentakisphosphate 3-kinase activity [GO:0102092];ATP binding [GO:0005524];diphosphoinositol-pentakisphosphate kinase activity [GO:0033857];inositol heptakisphosphate kinase activity [GO:0000829];inositol hexakisphosphate 1-kinase activity [GO:0052723];inositol hexakisphosphate 3-kinase activity [GO:0052724];inositol hexakisphosphate 5-kinase activity [GO:0000832]	38	0	74.976	143	2.1	2.1	4.4	1	1.9	2.5	1.3	1	A0A178VEL3	A0A178VEL3	5	AtVIP1	Inositol hexakisphosphate and diphosphoinositol-pentakisphosphate kinase	248;282;337;706	59;361
NaN	24169132232666	229638805389404	NaN			FMN binding [GO:0010181];oxidoreductase activity [GO:0016491]	4	0.0086572	1.5291	6	0	2.2	3.2	0	3.6	3.6	11.9	5.8	A0A178VMD8	A0A178VMD8	6	HAOX2	Aldolase-type TIM barrel family protein
254892234802246	257843418121338	248512897491455	249354858398438			UDP-glycosyltransferase activity [GO:0008194]	3	0	3.7199	11	3.7	3.7	7	5	5	5	5.3	5	A0A178VRK6	A0A178VRK6	8	At2g30150	UDP-Glycosyltransferase superfamily protein	425;431
253362331390381	251070137023926	250140590667725	25443416595459	protein initiator methionine removal [GO:0070084]	cytoplasm [GO:0005737]	metal ion binding [GO:0046872];metalloaminopeptidase activity [GO:0070006]	9	0	4.8987	9	15.9	21.2	19.9	15.9	19.9	19.9	23.1	23.1	A0A178VUM7	A0A178VUM7	9	MAP2A	Methionine aminopeptidase 2	223	6;132;185;243			40		91
2623317527771	249383163452148	264403781890869	264235019683838	RNA metabolic process [GO:0016070]		RNA binding [GO:0003723];sequence-specific DNA binding [GO:0043565];single-stranded DNA binding [GO:0003697]	9	0	14.904	60	14.6	7.8	11	11	14.6	17.8	12.3	10.7	A0A178W0K0	A0A178W0K0	13	At2g37020	Translin family protein	159;242	245
260417652130127	270386295318604	259688415527344	255711193084717		small-subunit processome [GO:0032040]		5	0.0013038	2.3067	4	1.1	0.9	1.1	2	1.1	2	1.1	1.1	A0A178W3G2	A0A178W3G2	14	At1g69070	Nucleolar-like protein
228021697998047	234352989196777	225984153747559	232262916564941				14	0	60.791	61	7.8	7.8	6.6	9.6	2.8	2.8	5.3	2.8	A0A1I9LLC0	A0A1I9LLC0	17	CID4	CTC-interacting domain 4		217;236;400;414;431
243109130859375	234694862365723	242755451202393	241931743621826	microtubule nucleation [GO:0007020]	cytoplasm [GO:0005737];microtubule [GO:0005874];microtubule organizing center [GO:0005815];spindle pole [GO:0000922]	gamma-tubulin binding [GO:0043015]	3	0.0033021	2.0431	12	1.1	1.1	1.1	1.1	1.1	1.1	1.1	1.1	A0A1I9LLT8	A0A1I9LLT8	20	GCP4	Gamma-tubulin complex component		373
274296588897705	27176456451416	272127113342285	273271446228027			aspartic-type endopeptidase activity [GO:0004190]	7	0	26.925	74	8.8	5.9	5.9	6.8	9	5.9	9	5.9	A0A1I9LM46	A0A1I9LM46	22	At3g51330	Eukaryotic aspartyl protease family protein	271	356
301202812194824	301028709411621	288437385559082	297602443695068	carbohydrate metabolic process [GO:0005975]	integral component of membrane [GO:0016021]	beta-galactosidase activity [GO:0004565]	39	0	279.18	242	24.3	33.8	27.4	33.2	37.3	31.5	35	33.9	A0A1I9LM56	A0A1I9LM56	23	BGAL2	Beta-galactosidase	397;426;461;723;734;738	204;212;213;219;388;414;421;423;470;479;633;669;697;732;733		703			631;695
288426609039307	288150367736816	288782405853271	289389877319336			RNA binding [GO:0003723]	21	0	120.53	294	25.1	22.2	21.7	23	21.7	23	23	21.7	A0A1I9LM90	A0A1I9LM90	25	FLK	RNA-binding KH domain-containing protein	284	197;270;344
NaN	267989711761475	NaN	247636489868164	transcription, DNA-templated [GO:0006351]	host cell nucleus [GO:0042025]	DNA binding [GO:0003677];DNA-directed 5'-3' RNA polymerase activity [GO:0003899];zinc ion binding [GO:0008270]	14	0	65.473	19	0	0.9	0	1.2	0	0	0	1.1	A0A1I9LME9	A0A1I9LME9	26	NRPA1	DNA-directed RNA polymerase subunit	847;902
231783866882324	239534931182861	23679386138916	244458808898926	phloem development [GO:0010088]			6	0	11.152	14	2.7	1.5	2.7	1.5	0	1.2	1.5	1.2	A0A1I9LMF2	A0A1I9LMF2	27	SEOa	Sieve element occlusion protein
242499580383301	24237174987793	NaN	249387187957764		integral component of membrane [GO:0016021]		1	0.00094429	2.5477	2	20.8	20.8	0	20.8	20.8	0	20.8	20.8	A0A1I9LMI8	A0A1I9LMI8	29	At3g23450	Transmembrane protein		176
252318382263184	245860614776611	246566543579102	250370788574219	autophagy [GO:0006914];protein transport [GO:0015031]	cytoplasm [GO:0005737]	cysteine-type peptidase activity [GO:0008234]	10	0	60.132	50	10.5	3.6	3.6	3.6	12.8	14.6	12.8	12.8	A0A1I9LMQ9	A0A1I9LMQ9	32	At3g59950	Cysteine protease	205;306;327	294
258593235015869	244819774627686	246858139038086	247189483642578	de-etiolation [GO:0009704];response to far red light [GO:0010218];seed germination [GO:0009845]	integral component of membrane [GO:0016021];perinuclear region of cytoplasm [GO:0048471]	hydrolase activity, acting on carbon-nitrogen (but not peptide) bonds [GO:0016810]	3	0.0054093	1.7957	5	2.4	2.4	4.8	4.8	7.5	4.8	4.8	4.8	A0A1I9LN01	A0A1I9LN01	33	LAF3	Protein LONG AFTER FAR-RED 3
28867057800293	294020843505859	290862598419189	291033210754395			RNA binding [GO:0003723]	11	0	34.628	54	19.6	17.1	20.8	11.5	16.4	20.5	20.8	16.4	A0A1I9LN63	A0A1I9LN63	34	At3g16230	Putative eukaryotic LigT	397;398
234041862487793	232475261688232	239676322937012	23360782623291	nucleotide-sugar metabolic process [GO:0009225]		dTDP-glucose 4,6-dehydratase activity [GO:0008460]	52	0	102.06	64	13.5	15.1	14.1	14.5	18.7	18	24.7	20.7	A0A1I9LN83	A0A1I9LN83	36	RHM3	Rhamnose biosynthesis 3	47;121;231;402;471;532	10;37;43;51;57;122;201;299;301;317;400;404;518;553;626;641;644;653;665		109;110;190;196			171;538
28998815536499	289729270935059	291277523040771	290957202911377				15	0	80.458	134	45.1	27.8	58.5	61.2	35.5	42.4	62.4	57.3	A0A1I9LNQ7	A0A1I9LNQ7	38	At3g02510	Regulator of chromosome condensation (RCC1) family protein	45;65;88;251;319	19;86;91;315
297522583007813	298562774658203	297912120819092	297615451812744				20	0	131.46	240	53.8	33.6	51.7	44.6	53.5	52	52.3	50.5	A0A1I9LNT2	A0A1I9LNT2	39	SDR1	NAD(P)-binding Rossmann-fold superfamily protein	54;163;175;278;317	82;83;172;183;267;268		259			197
295972766876221	297126979827881	29761022567749	295943965911865				8	0	62.724	165	34.4	34.4	34.4	34.4	34.4	34.4	34.4	34.4	A0A1I9LNZ1	A0A1I9LNZ1	40	At3g07470	Uncharacterized protein	69
334914245605469	339601669311523	334841194152832	334684219360352				22	0	43.56	43	0.5	0.5	1	0.5	0.5	0.5	0.5	1	A0A1I9LP28	A0A1I9LP28	41	At3g06530	ARM repeat superfamily protein	183;955;1753
279480991363525	276256828308105	277956314086914	283030834197998	calcium-mediated signaling [GO:0019722]		calcium ion binding [GO:0005509]	8	0	76.319	90	35.5	33.6	35.5	35.5	31.8	33.6	31.8	33.6	A0A1I9LPJ2	A0A1I9LPJ2	42	CAM7	Calmodulin		78;87;95		98			77
NaN	237154445648193	240932140350342	249714088439941				10	0	12.992	13	0	1.5	1.5	3.3	1.7	1.5	3.3	0	A0A1I9LPW3	A0A1I9LPW3	44	At3g04490	Exportin-4 protein
266265888214111	257266597747803	264003143310547	264498672485352				27	0	159.12	85	1.1	1.1	1.1	2.9	1.7	1.5	1.1	1.5	A0A1I9LPZ1	A0A1I9LPZ1	45	At3g50370	Uncharacterized protein		804;1476;1478		87
21915246963501	NaN	217272109985352	200293140411377			serine-type endopeptidase activity [GO:0004252]	45	0	291.84	257	1.1	0	2.2	2.3	1.1	0.8	2.1	2.1	A0A1I9LPZ9	A0A1I9LPZ9	47	DEG7	DegP protease 7	25;402;720;892;900;945;947	48;164;248;256;258;427;853;932;1028;1035;1061		813;1026			557
NaN	328095245361328	328306999206543	NaN	cellular response to DNA damage stimulus [GO:0006974]		ATP binding [GO:0005524];protein serine/threonine kinase activity [GO:0004674]	6	0	3.4473	5	0.7	1.6	1.6	0.7	1.6	1.6	1.6	1.6	A0A1I9LQ79	A0A1I9LQ79	49	ATM	Serine/Threonine-kinase ATM-like protein	1507	51;53;68;913
371981163024902	372795028686523	370910263061523	371340370178223	carbon utilization [GO:0015976]		carbonate dehydratase activity [GO:0004089];zinc ion binding [GO:0008270]	58	0	323.31	2321	92.7	100	99.6	99.6	99.6	99.6	99.6	98.5	A0A1I9LQB3	A0A1I9LQB3	50	CA1	Carbonic anhydrase	90;96;153;180;200;203	14;15;20;24;30;46;47;56;61;63;64;66;79;84;123;125;141;157;178;184;186;227;233		70;113;116;144;167;168;214	96	96;153;200;203	1;86;117;160
274524631500244	284028377532959	279123363494873	285080146789551			ATP binding [GO:0005524];helicase activity [GO:0004386]	4	0	3.2308	58	1.1	1.1	1.6	1.1	1.1	1.1	1.1	0.6	A0A1I9LQH7	A0A1I9LQH7	52	PIE1	SNF2 domain-containing protein / helicase domain-containing protein		111;114					113	1019;1021
NaN	24986026763916	248136253356934	NaN				5	0	4.1228	19	0	5.4	10	0	15.8	11.3	5.4	5.4	A0A1I9LQU5	A0A1I9LQU5	56	FIB4	Plastid-lipid associated protein PAP / fibrillin family protein		90
NaN	NaN	222785263061523	241353969573975				26	0	323.31	208	0	0	5.3	5.3	0	5.3	0	0	A0A1I9LRA3	A0A1I9LRA3	59	At3g20370	TRAF-like family protein	190	48;56;69;78;142;146;177;181		232;247			70;164;198;265
274339637756348	273178615570068	274419765472412	274028377532959			peptidyl-prolyl cis-trans isomerase activity [GO:0003755]	9	0	24.962	51	21	12.9	24.7	28.4	31	26.2	27.3	22.5	A0A1I9LRJ6	A0A1I9LRJ6	61	At3g60370	Peptidylprolyl isomerase		114
263243675231934	259951362609863	264998588562012	264822845458984	cell wall modification [GO:0042545];pectin catabolic process [GO:0045490]	integral component of membrane [GO:0016021]	aspartyl esterase activity [GO:0045330];enzyme inhibitor activity [GO:0004857];pectinesterase activity [GO:0030599]	3	0	5.0873	13	3.9	2.3	5.8	5.8	5.8	5.8	5.8	5.8	A0A1I9LRM8	A0A1I9LRM8	62	At3g49220	Pectinesterase		513
247787628173828	256850929260254	251336326599121	257815933227539	nuclear export [GO:0051168]	nucleus [GO:0005634]		14	0	18.154	62	0.5	1.5	0.5	0.5	0.5	0.5	1.3	0.5	A0A1I9LRW7	A0A1I9LRW7	63	HST	ARM repeat superfamily protein
NaN	NaN	217832469940186	21869966506958			nucleic acid binding [GO:0003676]	11	0	38.539	49	0	0	6.2	6.2	6.2	6.2	3.9	3.9	A0A1I9LSC2	A0A1I9LSC2	66	At3g07030	Alba DNA/RNA-binding protein		9;11;26;59
222228488922119	234676208496094	220262775421143	239601383209229			zinc ion binding [GO:0008270]	143	0	323.31	593	0.8	0.7	0.5	1.8	0.2	0.5	0.5	0.6	A0A1I9LSK3	A0A1I9LSK3	67	BIG	Auxin transport protein (BIG)	9;202;462;603;748;806;878;1310;1390;1627;1629;2172;2396;2915;3284;3467;3470;3477;3493;3496;4112;4333;4334;4773;4835	207;414;2141;2143;2144;2148;3133;3157;3158;3169;3541;3590;3676;3697;4124;4482;4616;5000;5033
253799743652344	256907768249512	252589321136475	251237239837646	pectin catabolic process [GO:0045490]		metal ion binding [GO:0046872];pectate lyase activity [GO:0030570]	3	0	6.5644	6	2.6	10.7	2.6	10.7	10.7	10.7	10.7	5.2	A0A1I9LSL6	A0A1I9LSL6	68	At3g07010	Pectate lyase	57
299450302124023	299135646820068	299178371429443	30085880279541		extracellular region [GO:0005576]		21	0	172.86	191	58.4	52.1	54.6	54.6	54.2	43.7	55.9	58.4	A0A1I9LT21	A0A1I9LT21	70	EXLA1	Expansin-like A1	45;48;53;59;115;229;232	54;57;62;91;98;102;120;131;132;178					122
265754241943359	27146276473999	268046436309814	268153114318848				10	0	7.6887	44	10.6	10.7	10.3	11.6	7	6.9	8.3	7.2	A0A1I9LT48	A0A1I9LT48	72	CHUP1	Hydroxyproline-rich glycoprotein family protein
241941528320313	246343364715576	243351097106934	244314136505127			ligase activity [GO:0016874]	2	0	3.5848	7	3.4	3.4	3.4	3.4	3.4	3.4	3.4	3.4	A0A1I9LTH3	A0A1I9LTH3	75	At3g10250	Histidine-tRNA ligase
269557113647461	269950714111328	272071342468262	273299694061279	metabolic process [GO:0008152]	membrane [GO:0016020]	calcium ion binding [GO:0005509];mannosyl-oligosaccharide 1,2-alpha-mannosidase activity [GO:0004571]	12	0	40.694	93	10.6	8.9	12.6	12.7	13.8	14.3	10.9	14	A0A1P8AM79	A0A1P8AM79	78	MNS3	alpha-1,2-Mannosidase
286109790802002	287837543487549	27960578918457	279011573791504	protein retention in Golgi apparatus [GO:0045053];protein targeting to vacuole [GO:0006623]	extrinsic component of membrane [GO:0019898]		6	0	4.3005	33	0.7	0.7	0.7	0.5	0.8	0.5	0.7	0.7	A0A1P8AMQ1	A0A1P8AMQ1	79	At1g48090	Calcium-dependent lipid-binding family protein
23476053237915	253668632507324	246045589447021	245440979003906		integral component of membrane [GO:0016021]	oxidoreductase activity, acting on the aldehyde or oxo group of donors, disulfide as acceptor [GO:0016624]	20	0	194.94	58	16.8	3.2	19.1	17.2	13.7	12.6	7.4	7.4	A0A1P8AMS1	A0A1P8AMS1	80	At1g21400	Thiamin diphosphate-binding fold (THDP-binding) superfamily protein	258	146;180;367;468;479;482;508
247291011810303	242929153442383	248320007324219	245766353607178	protein transport [GO:0015031]			2	0.00019257	2.8778	2	7.1	11.1	7.1	7.1	7.1	7.1	7.1	7.1	A0A1P8ANA1	A0A1P8ANA1	83	At1g25420	Regulator of Vps4 activity in the MVB pathway protein
274098930358887	2775417137146	275128440856934	275778026580811				8	0	5.5928	39	8.2	7.4	7.2	9	9	7.2	9	7.2	A0A1P8ANB4	A0A1P8ANB4	84	SKIP16	SKP1/ASK-interacting protein 16	92;235
235000877380371	NaN	233862705230713	238490962982178		integral component of membrane [GO:0016021]	ATP binding [GO:0005524];protein kinase activity [GO:0004672]	3	0	4.0417	18	1.9	1.9	1.9	1.9	1.9	1.9	1	1.9	A0A1P8ANE5	A0A1P8ANE5	85	At1g56145	Leucine-rich repeat transmembrane protein kinase
264262886047363	267192096710205	265402889251709	262861442565918	plant-type cell wall organization [GO:0009664]	cell wall [GO:0005618];extracellular region [GO:0005576];membrane [GO:0016020]		5	0	14.659	32	10.9	20.2	10.9	18.7	10.9	24.4	15	17.6	A0A1P8APG3	A0A1P8APG3	87	EXPA11	Expansin		77					70
307624015808105	309093494415283	307768230438232	307745475769043		extracellular space [GO:0005615]		36	0	323.31	524	64.1	60.5	59.8	56.9	64.6	66.5	61	56.2	A0A1P8API2	A0A1P8API2	89	SERPIN1	Serine protease inhibitor (SERPIN) family protein	348;357	134;138;146;207;225;234;235;236;258;303;306;308;345;355		123;174;290			42;231
NaN	242242774963379	236170597076416	NaN				5	0	6.4111	5	0	3.3	3	0	0	7.3	3	0	A0A1P8APQ0	A0A1P8APQ0	90	CW7	CW7
32958194732666	327765884399414	330398979187012	33132682800293	glucose metabolic process [GO:0006006]	integral component of membrane [GO:0016021]	NAD binding [GO:0051287];NADP binding [GO:0050661];oxidoreductase activity, acting on the aldehyde or oxo group of donors, NAD or NADP as acceptor [GO:0016620]	59	0	323.31	584	73.9	72.3	73.9	72.3	74.4	74.4	74.4	73.9	A0A1P8APR6	A0A1P8APR6	91	GAPA-2	Glyceraldehyde-3-phosphate dehydrogenase	258;262;382;393	129;145;152;165;177;180;215;222;223;231;273;278;320;330;332;356;357;373;376;441		112;139;310;328;334;344;364;421;438;439		382	281;406;408;412
254737949371338	257170677185059	NaN	255635757446289	protein transport [GO:0015031]	integral component of Golgi membrane [GO:0030173]		2	0.0032961	2.0256	4	7.5	19.4	0	11.8	0	0	0	11.8	A0A1P8APW7	A0A1P8APW7	94	At1g29060	Target SNARE coiled-coil domain protein		52		53;54
243726539611816	243510398864746	244171237945557	244471416473389			acyl-CoA hydrolase activity [GO:0047617]	5	0	4.3916	38	13.4	7.1	13.4	13.4	13.4	13.4	13.4	13.4	A0A1P8APX5	A0A1P8APX5	96	At1g04290	Thioesterase superfamily protein		8
245017280578613	246458148956299	233714580535889	245634288787842	regulation of transcription, DNA-templated [GO:0006355]		transcription coregulator activity [GO:0003712]	4	0.0032919	2.0073	15	0.9	1.3	1.3	0.9	0.9	0.9	0	1.3	A0A1P8AQ03;REV__Q7XJE6	A0A1P8AQ03	98	NRB4	Mediator of RNA polymerase II transcription subunit 15a-like protein
245280857086182	223751754760742	248817100524902	252533893585205			calcium ion binding [GO:0005509]	35	0	211.45	151	7.5	0.7	6.6	4.3	2.3	5.8	6.7	4.3	A0A1P8AQ08	A0A1P8AQ08	99	At1g21630	Calcium-binding EF hand family protein		442;588;628;662;677;728;840;849;857;860
249122791290283	23029146194458	250163135528564	246240520477295				3	0	38.687	23	10.8	7.4	7.4	10.8	10.8	10.8	10.8	10.8	A0A1P8AQ22	A0A1P8AQ22	100	VAD1	GRAM domain family protein		68
271640377044678	272984161376953	273547267913818	271899929046631	NAD metabolic process [GO:0019674];NADP biosynthetic process [GO:0006741]		NAD+ kinase activity [GO:0003951]	9	0	22.982	105	25.7	18.1	25.7	25.7	24.6	19	22.2	18.1	A0A1P8AQ52	A0A1P8AQ52	101	NADK3	NAD(H) kinase 3	50;181;206	5;154;202
254569492340088	247362937927246	251278610229492	255179424285889	mRNA processing [GO:0006397]	nucleus [GO:0005634]	5'-3' exoribonuclease activity [GO:0004534];nucleic acid binding [GO:0003676];zinc ion binding [GO:0008270]	17	0	59.782	78	5.6	3.1	3.5	5.7	1.2	1.2	3.5	5.6	A0A1P8AQR8	A0A1P8AQR8	103	XRN4	5'-3' exoribonuclease	620;633	39;66;380;387
288871898651123	285660171508789	286555366516113	285781993865967			ADP binding [GO:0043531]	3	0.0060987	1.7106	45	2.1	2.1	2.1	2.1	2.5	2.5	2.1	2.1	A0A1P8AQY6	A0A1P8AQY6	104	RFL1	RPS5-like 1
260821285247803	258927516937256	267216892242432	257008113861084				20	0	51.871	57	4	4	1.4	4	1.4	1.4	1.4	1.4	A0A1P8AQY7	A0A1P8AQY7	105	GC5	Golgin Putative 5	609;689	254;658
244927730560303	237285823822021	245918350219727	246655731201172				3	0	3.2783	5	1.3	2.5	1.3	1.3	0	0	1.3	1.3	A0A1P8ARG8	A0A1P8ARG8	110	At1g18950	DDT domain superfamily
228865089416504	NaN	231182441711426	233957138061523	biosynthetic process [GO:0009058]		catalytic activity [GO:0003824]	2	0	4.3897	9	4.1	0	4.1	4.1	0	4.1	7.6	4.1	A0A1P8ARL5	A0A1P8ARL5	111	At1g03210	Phenazine biosynthesis PhzC/PhzF protein	273
231136417388916	229645862579346	231603870391846	232302856445313			metal ion binding [GO:0046872]	2	0.0052337	1.8084	2	5.7	5.7	5.7	5.7	5.7	0	5.7	5.7	A0A1P8ARX2	A0A1P8ARX2	113	TAF15	TBP-associated factor 15	133;136	195
NaN	243916549682617	243829116821289	NaN	DNA recombination [GO:0006310];double-strand break repair via nonhomologous end joining [GO:0006303];telomere maintenance [GO:0000723]	Ku70:Ku80 complex [GO:0043564]	ATP binding [GO:0005524];damaged DNA binding [GO:0003684];DNA helicase activity [GO:0003678];telomeric DNA binding [GO:0042162]	9	0	38.351	37	0	1.4	4.7	0	1.2	0	1.2	0	A0A1P8ASX4	A0A1P8ASX4	116	KU80	ATP-dependent DNA helicase 2 subunit KU80	612
273875541687012	260498447418213	272022838592529	268154335021973				16	0	12.797	38	0.3	0.8	0.5	0.2	0.5	0.5	0.5	0.2	A0A1P8AT16	A0A1P8AT16	117	SPI	BEACH-DOMAIN HOMOLOG A1		2;1348
24841438293457	24637767791748	NaN	242704925537109	regulation of translational initiation [GO:0006446];translational initiation [GO:0006413]	eukaryotic translation initiation factor 2B complex [GO:0005851]	translation initiation factor activity [GO:0003743]	4	0	4.2758	15	2	2	0	2	2	2	2	2	A0A1P8AT59	A0A1P8AT59	118	At1g53900	Eukaryotic translation initiation factor 2B (eIF-2B) family protein
246503677368164	240989265441895	243040332794189	241714248657227	positive regulation of kinase activity [GO:0033674];regulation of translation [GO:0006417]		protein kinase binding [GO:0019901];protein kinase regulator activity [GO:0019887];ribosome binding [GO:0043022]	105	0	323.31	475	0.2	1	1	1	1	1	1.4	1.6	A0A1P8AT97	A0A1P8AT97	119	ILA	ILITYHIA	383;1026;1130;1376;1458;1460;1997;2028;2275;2505;2633	435;853;902;966;1302;1342;1350;1518;1556;1567;1679;1930;1933;2247;2281;2392;2435;2450;2555;2594;2652
NaN	284796962738037	NaN	286639728546143	microtubule-based movement [GO:0007018]		ATP binding [GO:0005524];microtubule binding [GO:0008017];microtubule motor activity [GO:0003777]	6	0	6.1011	19	1.2	0.9	1.2	2.2	0.9	0.9	2.2	2.2	A0A1P8ATA6	A0A1P8ATA6	120	At1g63640	p-loop nucleoside triphosphate hydrolases superfamily protein with CH (Calponin Homology) domain-containing protein	68
348819427490234	347976875305176	347545394897461	34814640045166	rRNA processing [GO:0006364]	cytosol [GO:0005829]	catalytic activity [GO:0003824];RNA binding [GO:0003723]	65	0	323.31	1574	77	76	77	77	77	76	77	77	A0A1P8ATL2	A0A1P8ATL2	123	CRB	Chloroplast RNA binding protein	162;177;289	56;76;88;93;109;114;118;124;155;170;185;189;191;231;252;266;278;287;291;306;312;313;314;329;331;337;361;374;375		139;240;264			60;370
310237979888916	307229747772217	309136352539063	31029468536377		cytosol [GO:0005829]	serine-type endopeptidase activity [GO:0004252];serine-type exopeptidase activity [GO:0070008]	55	0	323.31	695	54.8	52.4	47.8	50.6	52.4	49.4	54.9	47.8	A0A1P8ATN7	A0A1P8ATN7	124	At1g50380	Prolyl oligopeptidase family protein	298;382;604;614;620;739	78;126;141;151;205;218;224;327;339;401;493;595;618;678
27461389541626	276180686950684	279598617553711	279621810913086			RNA binding [GO:0003723]	9	0	27.628	68	21.9	16	25.1	25.1	21.3	21.3	20.7	22.9	A0A1P8ATW8	A0A1P8ATW8	125	At1g53120	RNA-binding S4 domain-containing protein		77;80
284137306213379	28403284072876	28414981842041	287978897094727	retrograde transport, endosome to Golgi [GO:0042147]	cytosol [GO:0005829];GARP complex [GO:0000938]		30	0	127.39	108	2.9	4.5	2.9	2.9	2.9	2.9	1.3	1.6	A0A1P8ATX5	A0A1P8ATX5	126	HIT1	Membrane trafficking VPS53 family protein	91;147;222;276;280;391	285;295
292912082672119	292534961700439	292468090057373	292829723358154			thiosulfate sulfurtransferase activity [GO:0004792]	18	0	118.19	195	50.8	50	45.1	64.3	64.3	50.8	63.2	69.5	A0A1P8AU99	A0A1P8AU99	128	RDH2	Rhodanese homologue 2		9;139;158;168;202		70
247284259796143	244600143432617	240585422515869	243642616271973			GTP binding [GO:0005525];hydrolase activity [GO:0016787]	4	0.0031216	2.0528	8	3.2	3.2	9.8	13	0	3.2	0	3.2	A0A1P8AUC4	A0A1P8AUC4	129	AIG1	p-loop containing nucleoside triphosphate hydrolases superfamily protein	223
284421348571777	289058399200439	285324478149414	287275104522705				6	0	11.346	35	1.3	1.3	1.3	1.3	2.7	2.7	2.7	1.3	A0A1P8AUF8	A0A1P8AUF8	131	At1g23180	ARM repeat superfamily protein
285562534332275	286638717651367	284897212982178	284805068969727	leucine biosynthetic process [GO:0009098]		3-isopropylmalate dehydrogenase activity [GO:0003862];magnesium ion binding [GO:0000287];NAD binding [GO:0051287]	31	0	145.97	106	52	48.7	51.8	51.8	51.1	51.6	51.3	48	A0A1P8AUM8	A0A1P8AUM8	135	IMD3	3-isopropylmalate dehydrogenase	244;402	140;178;242;248;363;370;373;385;398;403		209			187;360
237571506500244	NaN	237352085113525	235495719909668	protein folding [GO:0006457]		ATP binding [GO:0005524]	2	0.003647	1.9513	6	8.5	0	8.5	8.5	0	8.5	8.5	8.5	A0A1P8AUX7	A0A1P8AUX7	138	CPN10	Chaperonin 10
NaN	272213115692139	267527694702148	270296001434326	nucleus organization [GO:0006997]	nucleus [GO:0005634]		2	0.0065989	1.6286	12	0	1.9	1.9	1.9	0.8	1.1	0	0	A0A1P8AUZ9	A0A1P8AUZ9	140	LINC2	Nuclear matrix constituent protein-like protein		92;93;420					90
296682910919189	300322303771973	296453323364258	300202236175537	lipid metabolic process [GO:0006629]		aspartic-type endopeptidase activity [GO:0004190]	31	0	323.31	428	39.5	34.8	46	33.1	35.8	29.6	36.6	39.5	A0A1P8AV08	A0A1P8AV08	141	APA1	Aspartic proteinase A1	124;130;422;436;473	135;137;146;149;186;222;258;260		147;166;255;508			220;429
264962825775146	264736557006836	262213478088379	266314525604248		ribosome [GO:0005840]	rRNA binding [GO:0019843];structural constituent of ribosome [GO:0003735];translation elongation factor activity [GO:0003746]	3	0	6.2972	11	13	13	13	10.4	10	10.4	7.4	7.4	A0A1P8AV66	A0A1P8AV66	142	At1g64510	Translation elongation factor EF1B/ribosomal protein S6 family protein
274186859130859	230820465087891	252889804840088	254626388549805	intracellular protein transport [GO:0006886];vesicle-mediated transport [GO:0016192]	COPI-coated vesicle membrane [GO:0030663];Golgi membrane [GO:0000139];membrane coat [GO:0030117]	structural molecule activity [GO:0005198]	58	0	323.31	343	2.7	3.1	0.9	0.9	4	2.2	8.1	3.1	A0A1P8AV73	A0A1P8AV73	143	At1g52360	Coatomer subunit beta'	190;352;403;534;690	69;91;93;168;199;212;313;318;360;411;413;417;422;616;672;721;766;776;780;823;831		492			308;679
293902416229248	286939830780029	290351448059082	296720905303955	endonucleolytic cleavage of tricistronic rRNA transcript (SSU-rRNA, 5.8S rRNA, LSU-rRNA) [GO:0000479];maturation of SSU-rRNA from tricistronic rRNA transcript (SSU-rRNA, 5.8S rRNA, LSU-rRNA) [GO:0000462]	90S preribosome [GO:0030686];nucleus [GO:0005634]	GTP binding [GO:0005525];GTPase activity [GO:0003924];U3 snoRNA binding [GO:0034511]	7	0	4.122	34	1.5	2.4	2.4	1.5	2.4	2.4	2.4	2.4	A0A1P8AVE9	A0A1P8AVE9	145	At1g06720	p-loop containing nucleoside triphosphate hydrolases superfamily protein		549;1104					1101
273228549957275	267486801147461	265647525787354	252513313293457		integral component of membrane [GO:0016021]	ATP binding [GO:0005524];protein kinase activity [GO:0004672]	14	0	54.865	45	1.8	1.8	1.8	1.8	0	0	0	0	A0A1P8AVQ6	A0A1P8AVQ6	147	At1g51850	Leucine-rich repeat protein kinase family protein	317;322;381	60;66;74
258693828582764	257663803100586	257987480163574	NaN				7	0.0020348	2.1783	9	4.2	4.2	4.2	0	5.6	2.1	0	2.1	A0A1P8AW11	A0A1P8AW11	149	ATG18H	Autophagy 18h-like protein				481
239080238342285	241795711517334	240534133911133	239167041778564	microtubule severing [GO:0051013]	cytoplasm [GO:0005737];katanin complex [GO:0008352];microtubule [GO:0005874]	microtubule binding [GO:0008017]	2	0.0022157	2.1462	6	1	1	2.7	2.7	1	1	1	1	A0A1P8AW69	A0A1P8AW69	151	At1g11160	Katanin p80 WD40 repeat-containing subunit B1 homolog
21805814743042	221611557006836	209818954467773	23023099899292				17	0	52.025	64	2.3	1.9	1.9	4	0	4	0	1.9	A0A1P8AW83;Q9LDL7	A0A1P8AW83	152	SCL5	Scarecrow-like 5	442;453;523	217;385;467
267902946472168	273425712585449	268150672912598	255362930297852	phosphatidylinositol phosphorylation [GO:0046854];phosphatidylinositol-mediated signaling [GO:0048015]		kinase activity [GO:0016301]	25	0	61.416	88	0.8	1.6	0.8	1.4	2.4	2.8	1.4	2.4	A0A1P8AWA3	A0A1P8AWA3	153	ATPI4K ALPHA	Phosphatidylinositol 3-and 4-kinase family protein	8;840
254741058349609	252116718292236	258014888763428	258708190917969		chloroplast [GO:0009507]	ATP binding [GO:0005524];hydrolase activity [GO:0016787]	7	0	4.8324	21	8.8	8.8	9.8	8.8	6.1	8.3	6.1	7	A0A1P8AWP1	A0A1P8AWP1	157	At1g73170	p-loop containing nucleoside triphosphate hydrolases superfamily protein
252108535766602	256198883056641	252149353027344	252285766601563				7	0	4.8432	8	18.8	3.8	11.5	8.3	18.8	13.2	11.5	17.7	A0A1P8AWP9	A0A1P8AWP9	158	At1g31500	DNAse I-like superfamily protein	212
253915252685547	253029537200928	246253337860107	248451766967773				5	0	8.1764	27	11.1	3.3	11.1	11.1	11.1	3.3	3.3	3.3	A0A1P8AWV1	A0A1P8AWV1	162	YUP8H12R.14	Nitrobindin heme-binding domain protein		155
333672370910645	334384956359863	3332763671875	334197845458984				48	0	323.31	964	71.4	70.4	70.6	68.9	70.6	68.9	70.6	72	A0A1P8AWX3;O48705	A0A1P8AWX3	163	At1g33590	Leucine-rich repeat (LRR) family protein	96;97;104;389;485;503;505;512	91;92;136;138;256;295;317;385;388;392;439;446;451;466;492;513		100;220;221;269;274			237;258;393;470
25699197769165	25830961227417	258655433654785	261743049621582			sirohydrochlorin cobaltochelatase activity [GO:0016852]	5	0	16.361	28	5.1	20.4	16.7	16.7	25.5	25.5	36.1	30.6	A0A1P8AWY5	A0A1P8AWY5	164	SIRB	Sirohydrochlorin ferrochelatase B	126;190;201;204	132
276246376037598	276342258453369	270320205688477	271939449310303		chloroplast [GO:0009507]		6	0	23.932	39	26.8	26.8	27.9	27.9	26.8	17.9	17.9	22.3	A0A1P8AX61	A0A1P8AX61	166	At2g01755	Uncharacterized protein	126	148;174
267386665344238	264466686248779	266589450836182	262435264587402	DNA repair [GO:0006281]		class I DNA-(apurinic or apyrimidinic site) endonuclease activity [GO:0140078];DNA binding [GO:0003677];endonuclease activity [GO:0004519];metal ion binding [GO:0046872]	5	0	8.3443	33	5.7	7	3.6	5.7	7.9	7.9	7.9	7	A0A1P8AX84	A0A1P8AX84	167	ARP	DNA-(apurinic or apyrimidinic site) lyase
233222370147705	222866973876953	22961498260498	227618637084961	proteasome assembly [GO:0043248]		molecular adaptor activity [GO:0060090]	62	0	289.7	243	0.4	1	1.1	1.1	1.5	2.6	1.5	1.5	A0A1P8AX98	A0A1P8AX98	168	At2g26780	ARM repeat superfamily protein	1131;1143;1188;1199;1556;1741	62;72;165;266;277;522;994;1069;1095;1186;1353;1377
253300552368164	250384616851807	250573024749756	258217716217041				4	0.00038234	2.7554	17	5.7	5.7	5.7	6.1	8	3.8	5.7	6.1	A0A1P8AXA5	A0A1P8AXA5	169	MEE18	Maternal effect embryo arrest 18
257265300750732	254472675323486	257454776763916	253658294677734			ATP binding [GO:0005524];helicase activity [GO:0004386];nucleic acid binding [GO:0003676]	9	0	24.185	57	5.9	4.6	3.2	4.3	6.6	7.9	6.6	2.6	A0A1P8AXM2	A0A1P8AXM2	170	At2g35920	RNA helicase family protein	310;314
297864685058594	298719253540039	297291660308838	298033351898193	NAD biosynthetic process [GO:0009435]		nicotinate phosphoribosyltransferase activity [GO:0004516];nicotinate-nucleotide diphosphorylase (carboxylating) activity [GO:0004514]	29	0	133.78	285	42.5	41.5	51.3	48	41.7	41.9	41.7	49.1	A0A1P8AXW4	A0A1P8AXW4	172	NAPRT2	Nicotinate phosphoribosyltransferase	73;93;102;110;195;248;347;430	4;237;418;431;505
208095474243164	218093528747559	241682147979736	257897243499756	translation [GO:0006412]	ribosome [GO:0005840]	structural constituent of ribosome [GO:0003735]	38	0	263.13	301	6.9	4.1	10.6	10.6	18.4	5.5	10.6	4.1	A0A1P8AY36	A0A1P8AY36	174	At2g34480	Ribosomal protein L18ae/LX family protein	161;175	59;64;69;79;81;94;114;133;166;173;176;181;187;189;203;205;209;212		96;141			131;147;151
238498592376709	237792644500732	23943868637085	240870742797852				3	0	3.2767	17	6.3	3.1	3.1	7.8	7.8	3.1	6.3	6.3	A0A1P8AY74	A0A1P8AY74	175	Basic Proline-rich Protein 1	Flocculation FLO11-like protein
230212707519531	NaN	227308006286621	NaN	regulation of transcription, DNA-templated [GO:0006355]		histone binding [GO:0042393]	3	0	4.3345	9	3.5	3.9	3.5	0	7.5	7.5	11.4	3.9	A0A1P8AYM4	A0A1P8AYM4	178	AL6	Alfin-like 6	41
28383768081665	293095607757568	286730346679688	286320781707764				12	0	62.508	85	33.1	28.7	37.8	37.5	37.5	37.8	37.5	37.5	A0A1P8AYM6	A0A1P8AYM6	179	At2g29320	NAD(P)-binding Rossmann-fold superfamily protein	27;53;164	168;182;195;196
255773277282715	NaN	257903461456299	260527496337891	intracellular protein transport [GO:0006886];vesicle-mediated transport [GO:0016192]	clathrin adaptor complex [GO:0030131]		8	0	33.699	32	10.6	0	4.4	2.3	4.4	2.3	6.5	2.3	A0A1P8AYQ6	A0A1P8AYQ6	180	At2g20790	Clathrin adaptor complexes medium subunit family protein	403;444
261825675964355	NaN	NaN	242519817352295	protein secretion [GO:0009306]	integral component of plasma membrane [GO:0005887]		1	0.004717	1.8704	2	0.4	0	0	0.4	0.4	0	0.4	0.4	A0A1P8AYW3	A0A1P8AYW3	181	emb2410	Embryo defective 2410		50
244829616546631	224960193634033	231195888519287	219256057739258	glutamate metabolic process [GO:0006536]		glutamate decarboxylase activity [GO:0004351];pyridoxal phosphate binding [GO:0030170]	17	0	7.7682	17	14.7	14.7	16.7	13.8	12.5	12.5	12.5	13.9	A0A1P8AZ64	A0A1P8AZ64	183	GAD4	Glutamate decarboxylase	124;152;218	221;283;321		99;135			103;120;139
312046070098877	314666976928711	311339988708496	312514095306396	protoporphyrinogen IX biosynthetic process [GO:0006782];uroporphyrinogen III biosynthetic process [GO:0006780]		uroporphyrinogen-III synthase activity [GO:0004852]	24	0	233.65	251	52.5	52.5	50.8	53.2	52.5	53.2	52.2	43.8	A0A1P8AZK1	A0A1P8AZK1	185	HEMD	Uroporphyrinogen-III synthase	272	75;81;174;178;187;190;201;287		86
249729423522949	2517138671875	251648044586182	249265098571777		integral component of membrane [GO:0016021]		5	0	5.2472	7	12.2	7.5	9.3	12.2	4.5	4.8	11.6	10.9	A0A1P8AZP4	A0A1P8AZP4	186	TBL45	TRICHOME BIREFRINGENCE-LIKE 45	131
NaN	226772575378418	222890930175781	225082836151123		nucleus [GO:0005634]	ATP binding [GO:0005524]	11	0	13.459	40	0.9	1.6	1.6	1.6	0.9	1.6	1.6	2.5	A0A1P8AZP6	A0A1P8AZP6	187	PKL	Chromatin remodeling factor CHD3 (PICKLE)	1131	264;690		687;689
289367713928223	291831226348877	290151538848877	NaN		nucleus [GO:0005634]	DNA-binding transcription factor activity [GO:0003700];sequence-specific DNA binding [GO:0043565]	1	0.00038256	2.7661	6	6	6	6	0	6	6	6	0	A0A1P8AZP8	A0A1P8AZP8	188	WRKY55	WRKY DNA-binding protein 55				137
251871452331543	NaN	243985214233398	241112384796143	methylation [GO:0032259]		methyltransferase activity [GO:0008168]	3	0.0011261	2.4162	10	3.1	0	3.7	3.7	3.7	3.7	3.7	3.1	A0A1P8B0Q8	A0A1P8B0Q8	191	At2g26200	Methyltransferase-like protein
NaN	251765689849854	248372554779053	NaN			calcium ion binding [GO:0005509]	3	0	9.0477	8	0	6.9	13.8	0	0	0	6.9	0	A0A1P8B183	A0A1P8B183	194	TCH3	Calcium-binding EF hand family protein		4
246744365692139	NaN	244651317596436	NaN			DNA binding [GO:0003677];metal ion binding [GO:0046872]	9	0	7.7672	32	0.6	0	1.3	0	0.6	0	1.1	1.1	A0A1P8B1D0	A0A1P8B1D0	195	NERD	GW repeat-and PHD finger-containing protein NERD				1078
27916898727417	279991111755371	28090633392334	280435905456543			ureidoglycolate hydrolase activity [GO:0004848]	6	0	46.578	55	21.3	23.8	23.8	23.8	23.8	21.3	23.8	23.8	A0A1P8B223	A0A1P8B223	200	At2g35820	Ureidoglycolate hydrolase		222
305755157470703	30119909286499	301614685058594	301316089630127			peptidyl-prolyl cis-trans isomerase activity [GO:0003755]	16	0	215.21	217	47.9	47.3	47.3	47.9	49.7	67.1	49.1	49.1	A0A1P8B252	A0A1P8B252	201	At2g43560	Peptidylprolyl isomerase	32;36	38;55;58;106;116;120;133					45;78;115
230912628173828	234499778747559	NaN	NaN			hydrolase activity [GO:0016787]	16	0	82.805	48	4.4	4.9	3.1	0	0	8	8	0	A0A1P8B2T3	A0A1P8B2T3	207	At2g32150	Haloacid dehalogenase-like hydrolase (HAD) superfamily protein	168	95;107;115;193
239869384765625	NaN	244988098144531	NaN		integral component of membrane [GO:0016021]	aspartic-type endopeptidase activity [GO:0004190]	1	0.0013104	2.3751	8	1.7	1.7	1.7	0	1.7	0	0	0	A0A1P8B2Y1	A0A1P8B2Y1	208	SPPL3	SIGNAL PEPTIDE PEPTIDASE-LIKE 3
224394397735596	NaN	225270957946777	22324462890625				29	0	16.624	16	36.4	30.7	35.8	35.8	38.5	35.8	29.4	34.5	A0A1P8B345	A0A1P8B345	209	UXS6	UDP-XYL synthase 6	274	100;104;148;151;165;265;343;351;353					216;324;361
262259311676025	252255268096924	261071739196777	252541103363037	intracellular protein transport [GO:0006886];vesicle-mediated transport [GO:0016192]	clathrin adaptor complex [GO:0030131]		40	0	27.726	54	8.6	9.1	6.8	5.5	10.1	11.4	10.1	10.9	A0A1P8B3B6	A0A1P8B3B6	210	At4g23460	Beta-adaptin-like protein	20;31;37;160;297	25;36;39;218;228;401;445						31
275238018035889	270211505889893	27807165145874	275072593688965	signal transduction [GO:0007165]		ADP binding [GO:0043531]	23	0	19.189	61	9.4	10.8	11.5	13.1	8.2	6.5	7.2	8.9	A0A1P8B3F3	A0A1P8B3F3	212	RPP5	Disease resistance protein (TIR-NBS-LRR class) family	354;584	25;417;623
261682910919189	270563106536865	24381591796875	26191707611084	response to abscisic acid [GO:0009737]			4	0	3.9966	8	3.1	3.1	5.7	3.1	3.1	3.1	3.1	3.1	A0A1P8B3K6	A0A1P8B3K6	213	At4g25580	CAP160 protein		33;37
271253395080566	272817115783691	27503246307373	272717742919922		endoplasmic reticulum membrane [GO:0005789];integral component of membrane [GO:0016021]	flavin adenine dinucleotide binding [GO:0050660];FMN binding [GO:0010181];NADP binding [GO:0050661];NADPH-hemoprotein reductase activity [GO:0003958]	18	0	24.915	74	11.8	7.9	16.1	13.7	12.7	13.4	13.7	8.4	A0A1P8B3S1	A0A1P8B3S1	215	ATR2	NADPH--cytochrome P450 reductase	475;604	191;502;561;593;700		594	588
317581958770752	317658023834229	316046562194824	317295551300049	carbohydrate metabolic process [GO:0005975]		hydrolase activity, hydrolyzing O-glycosyl compounds [GO:0004553]	21	0	323.31	588	55.2	62.9	55.2	59.4	58.4	42.2	47.3	39	A0A1P8B3U2	A0A1P8B3U2	216	At4g16260	Glycosyl hydrolase superfamily protein		118;282;288;297		50;68;69;72;92;234;280;289			1;2;101;276
24909854888916	2527294921875	25498140335083	255280570983887				5	0	5.8976	26	10.1	10.6	22.6	22.6	16.6	17.1	16.1	22.6	A0A1P8B3Z7	A0A1P8B3Z7	217	RRP41L	3'-5'-exoribonuclease family protein		15
251933250427246	246666030883789	253185176849365	250361156463623				3	0	5.007	20	5.3	2.4	8	8	8	8	8	5.6	A0A1P8B441	A0A1P8B441	219	At4g15450	Senescence/dehydration-associated protein-like protein
320147819519043	325547180175781	318941745758057	320496673583984	protein import [GO:0017038];protein targeting [GO:0006605]	membrane [GO:0016020]	ATP binding [GO:0005524]	88	0	323.31	867	61.9	55	59.3	58	57.6	56	53.2	54.8	A0A1P8B485	A0A1P8B485	222	AGY1	Protein translocase subunit SecA	215;444;622;661;861	131;171;228;306;313;316;332;373;387;464;477;538;618;630;663;673;683;686;694;695;768;772;780;790;903;926;933					236;564
243586387634277	26092004776001	2493678855896	242134895324707	transcription, DNA-templated [GO:0006351]		chromatin binding [GO:0003682]	6	0.0052365	1.8158	21	4.1	4.1	4.1	2.7	4.1	4.1	3.3	5.5	A0A1P8B497	A0A1P8B497	223	At4g11560	Bromo-adjacent homology (BAH) domain-containing protein
260719184875488	254020080566406	255416488647461	251825294494629		90S preribosome [GO:0030686];nucleolus [GO:0005730];small-subunit processome [GO:0032040]		7	0.0057627	1.7656	14	0.9	0.3	0.9	0.3	0.3	0.3	0.3	0.3	A0A1P8B4E4	A0A1P8B4E4	224	At4g30990	ARM repeat superfamily protein
NaN	NaN	250243263244629	249668407440186			ATP binding [GO:0005524];hydrolase activity [GO:0016787];protein kinase activity [GO:0004672]	3	0.0043628	1.8973	5	0	0	3	1.8	0	3	1.8	1.8	A0A1P8B5B9	A0A1P8B5B9	229	At4g31230	Kinase with adenine nucleotide alpha hydrolases-like domain-containing protein
NaN	NaN	242841148376465	242050838470459			palmitoyl hydrolase activity [GO:0098599]	2	0.0067712	1.6213	5	0	0	3.2	3.2	3.2	3.2	3.2	0	A0A1P8B5G7	A0A1P8B5G7	230	At4g17480	Alpha/beta-Hydrolases superfamily protein
287610378265381	28669153213501	285597229003906	286905574798584				7	0	32.23	14	5.2	5.2	5.2	5.2	10.4	5.2	10.4	5.2	A0A1P8B5Y3	A0A1P8B5Y3	233	SEN1	Rhodanese/Cell cycle control phosphatase superfamily protein		68;120
243306713104248	242736968994141	NaN	NaN			peptidyl-prolyl cis-trans isomerase activity [GO:0003755]	2	0.00057252	2.7189	10	6.2	6.2	0	0	6.2	14.3	14.3	6.2	A0A1P8B637	A0A1P8B637	234	At4g26555	Peptidylprolyl isomerase
271016941070557	265097217559814	269230899810791	269642200469971	cell wall organization [GO:0071555]	cell wall [GO:0005618];extracellular region [GO:0005576];integral component of membrane [GO:0016021]	hydrolase activity [GO:0016787]	6	0	22.917	60	20.4	15	11.3	20.4	20.4	8.6	20.4	17.1	A0A1P8B651	A0A1P8B651	235	PAE8	Pectin acetylesterase	122;197;246
31808967590332	317728576660156	318157005310059	318895053863525		cytoplasm [GO:0005737]	metal ion binding [GO:0046872];metalloaminopeptidase activity [GO:0070006]	49	0	323.31	746	66.1	61.3	66.1	64.4	67.6	64.6	62.3	65.8	A0A1P8B667	A0A1P8B667	236	APP1	Aminopeptidase P1	428;439;468;521;618	129;132;146;171;178;180;231;272;280;311;323;326;335;375;381;390;460;466;474;503;617;635		241;489			12;153;282;544
250052165985107	261976985931396	NaN	255296649932861	dTMP biosynthetic process [GO:0006231];methylation [GO:0032259];one-carbon metabolic process [GO:0006730];tetrahydrofolate biosynthetic process [GO:0046654]		dihydrofolate reductase activity [GO:0004146];thymidylate synthase activity [GO:0004799]	11	0	24.872	25	7.7	6.8	6.4	5.2	5.6	5.6	5.2	4.2	A0A1P8B676	A0A1P8B676	237	THY-2	Bifunctional dihydrofolate reductase-thymidylate synthase
252094783782959	NaN	252431087493896	NaN			ATP binding [GO:0005524];protein kinase activity [GO:0004672]	7	0.0036463	1.9459	4	5.6	1.4	4.2	1.4	2.9	4.8	1.4	3.9	A0A1P8B6A6	A0A1P8B6A6	239	At4g10730	Protein kinase superfamily protein	63	653
239731616973877	231341743469238	NaN	226448249816895	CTP biosynthetic process [GO:0006241];'de novo' CTP biosynthetic process [GO:0044210];glutamine metabolic process [GO:0006541];pyrimidine nucleobase biosynthetic process [GO:0019856]		ATP binding [GO:0005524];CTP synthase activity [GO:0003883];identical protein binding [GO:0042802]	15	0	29.353	68	2.4	4.7	0	4	10.6	6.2	11.9	8.1	A0A1P8B6F9	A0A1P8B6F9	240	At4g02120	CTP synthase		523
214720916748047	NaN	214621887207031	NaN	regulation of transcription, DNA-templated [GO:0006355]	mediator complex [GO:0016592]		7	0	5.7835	20	1.2	0	1.2	0	0	0	0	0	A0A1P8B6J9	A0A1P8B6J9	242	SFR6	Sensitive to freezing 6	126;131
269285221099854	265630798339844	266463642120361	272874488830566	defense response [GO:0006952]	extracellular region [GO:0005576]	kinase activity [GO:0016301]	7	0	17.229	24	19.3	9.9	15.2	12.8	22.2	18.9	19.3	14.8	A0A1P8B6P8	A0A1P8B6P8	243	At4g18253	Receptor Serine/Threonine kinase-like protein	144;149;196	154;163
257247352600098	256009063720703	261198711395264	255098438262939				12	0	24.613	48	2.5	1.2	3.1	1.8	2.2	2.9	2.5	1.1	A0A1P8B770	A0A1P8B770	246	G2484-1	G2484-1 protein		425;426;1810
236779880523682	22751522064209	NaN	234897136688232			oxidoreductase activity [GO:0016491]	2	0.00019283	2.9064	11	4	6.2	0	2.2	6.2	6.2	6.2	6.2	A0A1P8B7E6	A0A1P8B7E6	248	At4g32360	Pyridine nucleotide-disulfide oxidoreductase family protein		163
252776031494141	239038009643555	NaN	251995906829834	ER-associated misfolded protein catabolic process [GO:0071712];ubiquitin-dependent ERAD pathway [GO:0030433]	VCP-NPL4-UFD1 AAA ATPase complex [GO:0034098]	polyubiquitin modification-dependent protein binding [GO:0031593]	11	0	51.34	35	1.3	2.8	0	1.6	1.3	0	1.2	1.3	A0A1P8B7F5	A0A1P8B7F5	249	At4g15420	Ubiquitin fusion degradation UFD1 family protein	526;545;626	157;162
267899227142334	267210369110107	271210975646973	271055946350098	polysaccharide catabolic process [GO:0000272]		amylopectin maltohydrolase activity [GO:0102229];beta-amylase activity [GO:0016161]	8	0	12.938	24	15.3	12.1	16.6	18.4	11.2	1.8	6.7	4.9	A0A1P8B7H0	A0A1P8B7H0	251	BAM5	Beta-amylase	398	390
287953834533691	290332813262939	289683475494385	2891530418396				15	0	59.973	111	28.3	30.2	30.2	30.2	27.7	28.3	28.3	24.2	A0A1P8B7H4	A0A1P8B7H4	252	At4g20750	NAD(P)-binding Rossmann-fold superfamily protein		243;292
27768440246582	273984394073486	277818183898926	270548629760742			RNA binding [GO:0003723]	1	0.0095137	1.4976	40	1.2	1.2	1.2	1.2	1.2	1.2	1.2	1.2	A0A1P8B7L2	A0A1P8B7L2	253	At4g29750	CRS1 / YhbY (CRM) domain-containing protein
254461326599121	260361785888672	252197799682617	255699329376221			metal ion binding [GO:0046872];oxidoreductase activity [GO:0016491]	3	0	3.8097	27	8.1	3	3	3	8.1	8.1	13.6	8.1	A0A1P8B7P9	A0A1P8B7P9	256	At4g16765	2-oxoglutarate (2OG) and Fe(II)-dependent oxygenase superfamily protein
281887683868408	286480102539063	281459846496582	275692081451416	RNA processing [GO:0006396]		RNA binding [GO:0003723];RNA methyltransferase activity [GO:0008173]	12	0	8.1502	39	1.1	1.1	1.1	1.1	1.1	1.6	1.1	1.1	A0A1P8B7Z4	A0A1P8B7Z4	259	At4g17610	tRNA/rRNA methyltransferase (SpoU) family protein
262110767364502	259310054779053	254792957305908	258474960327148	xylan catabolic process [GO:0045493]	cell wall [GO:0005618]	endo-1,4-beta-xylanase activity [GO:0031176]	8	0	12.76	30	6.2	2.8	4.4	4.4	13.2	16.3	17.4	11.1	A0A1P8B8F8	A0A1P8B8F8	261	XYN5	Endo-1,4-beta-xylanase 5	219
2380784034729	238416290283203	236742210388184	235121955871582		integral component of membrane [GO:0016021]	ATP binding [GO:0005524];protein kinase activity [GO:0004672]	3	0.0014859	2.2704	6	1.1	1.1	1.7	1.1	2.8	1.7	0	1.1	A0A1P8B8L9	A0A1P8B8L9	263	EMB1290	Cysteine-rich receptor-like protein kinase 17	218;221
311877765655518	311014308929443	312791347503662	313557357788086				82	0	323.31	798	45.3	48.8	48.4	46.2	45.3	45	45.6	45.6	A0A1P8B8R9	A0A1P8B8R9	265	At4g16660	Heat shock protein 70 (Hsp 70) family protein	368	68;85;113;124;270;280;307;333;363;380;384;389;407;418;473;478;491;581;646;650;660;667;669;687;700;708;749;774;780;784;790;797;803;807;814;821;827;845;848;851;883		311			293;295
283136310577393	287743911743164	283050422668457	283519916534424				11	0	66.625	104	16.9	10.3	16.9	18.2	19.5	18.2	18.2	16.9	A0A1P8B9A7	A0A1P8B9A7	267	CYL1	Alpha-N-acetylglucosaminidase family / NAGLU family	74;79	254;502
NaN	NaN	251254577636719	249108619689941			transferase activity [GO:0016740]	7	0	5.7353	15	0	0	3.8	3.8	0	0	3.8	0	A0A1P8B9C1	A0A1P8B9C1	268	GSTU9	Glutathione S-transferase tau 9		30;44;108;114
256238555908203	255565166473389	256609039306641	255220203399658				12	0	3.8657	26	7.1	6.4	3.6	6.9	4.4	2.5	4.1	7.2	A0A1P8B9J5	A0A1P8B9J5	270	MFC19.17	RNI-like superfamily protein
319144554138184	318053207397461	318055515289307	318436336517334	carboxylic acid metabolic process [GO:0019752]		transferase activity, transferring acyl groups, acyl groups converted into alkyl on transfer [GO:0046912]	49	0	323.31	374	68	72.1	67	63.1	64.8	69.5	60.1	60.5	A0A1P8B9L6	A0A1P8B9L6	271	MAM1	Methylthioalkylmalate synthase 1	188;258;270;321;368;412	93;106;136;167;171;206;225;229;230;247;271;367;426;443;453;465		348;375			151;224
301180534362793	289003219604492	301881313323975	300481719970703			peptidyl-prolyl cis-trans isomerase activity [GO:0003755]	16	0	253.23	152	49.3	44.8	42.1	51.7	55.2	47.9	53.1	43.4	A0A1P8B9P2	A0A1P8B9P2	272	At5g35100	Cyclophilin-like peptidyl-prolyl cis-trans isomerase family protein	61;79;176;275	122;161;242
299784202575684	299019622802734	299819622039795	299476795196533	glucan catabolic process [GO:0009251]		beta-glucosidase activity [GO:0008422]	27	0	240.32	273	34.8	27.3	33.6	33.3	34.9	32.7	37.2	37.5	A0A1P8B9U3	A0A1P8B9U3	274	At5g04885	Glycosyl hydrolase family protein	201;246;554	51;70;242;248;321;429;493
NaN	NaN	246911506652832	244583892822266	COPII vesicle coating [GO:0048208];protein transport [GO:0015031]	endoplasmic reticulum [GO:0005783];Golgi membrane [GO:0000139]		9	0.00075988	2.6255	14	1.9	0	2.2	2.2	1.2	1.2	2.2	0.9	A0A1P8B9X0	A0A1P8B9X0	275	MNJ7.8	Protein transport protein sec16	840;858
253862380981445	252203330993652	250895824432373	257069091796875	proteasome regulatory particle assembly [GO:0070682]	cytoplasm [GO:0005737];nucleus [GO:0005634];proteasome complex [GO:0000502]		7	0	70.19	37	12.5	12.5	6.2	5.1	15.6	7.4	15.6	7.4	A0A1P8BA81	A0A1P8BA81	277	MTI20.21	26S proteasome regulatory subunit	61;251
287336654663086	301372394561768	307916469573975	301876583099365				17	0	176	142	42.5	45.2	45.2	47.1	45.2	40.5	43.2	40.5	A0A1P8BAQ0	A0A1P8BAQ0	279	MNC6.3	Tetratricopeptide repeat (TPR)-like superfamily protein	12;115;140;243;258	17;133;150;152;201		128
270141429901123	265504531860352	269200267791748	267148933410645			heme binding [GO:0020037];metal ion binding [GO:0046872]	8	0	8.2796	39	21.4	17.5	22.2	26.8	22.6	18.7	23	17.5	A0A1P8BAR6	A0A1P8BAR6	280	RLF	Reduced lateral root formation	242	141
308718814849854	310697765350342	307820682525635	310213508605957	carbohydrate metabolic process [GO:0005975]		carbohydrate binding [GO:0030246];hydrolase activity, hydrolyzing O-glycosyl compounds [GO:0004553]	61	0	301.97	588	31.9	24.9	26.3	32.2	30.9	32	31.4	32.9	A0A1P8BAU5	A0A1P8BAU5	282	RSW3	Glycosyl hydrolases family 31 protein	56;62;73;499;883	63;94;115;149;217;226;269;401;433;459;591;769;864;898;908;946		204
238548126220703	241474800109863	237929286956787	241080513000488				1	0	3.9268	12	3.6	3.6	3.6	3.6	3.6	0	3.6	3.6	A0A1P8BAY4	A0A1P8BAY4	283	RUG3	Regulator of chromosome condensation (RCC1) family protein
31189603805542	308483428955078	311103572845459	309643726348877	L-methionine salvage from methylthioadenosine [GO:0019509];L-methionine salvage from S-adenosylmethionine [GO:0019284]	cytoplasm [GO:0005737]	2,3-diketo-5-methylthiopentyl-1-phosphate enolase activity [GO:0043715];2-hydroxy-3-keto-5-methylthiopentenyl-1-phosphate phosphatase activity [GO:0043716];acireductone synthase activity [GO:0043874];magnesium ion binding [GO:0000287];methylthioribulose 1-phosphate dehydratase activity [GO:0046570];zinc ion binding [GO:0008270]	39	0	323.31	552	54.5	44	55.4	55.3	55.3	56.2	42.8	59.8	A0A1P8BAY5	A0A1P8BAY5	284	DEP1	Probable bifunctional methylthioribulose-1-phosphate dehydratase/enolase-phosphatase E1	32;106;109;236;393	22;209;271;312;328;375;380;410;430;443;456;457					8;362
303333015441895	305792064666748	30468786239624	308514003753662			catalytic activity [GO:0003824]	28	0	296.3	293	47.6	46.9	48.2	57.1	53.7	47.8	51.2	56.7	A0A1P8BB43	A0A1P8BB43	285	MDJ22.4	Phosphoglycerate/bisphosphoglycerate mutase family protein	179;223;242;310;332;455	77;78;140;141;152;313;384		222			121
267002830505371	266056900024414	242545776367188	2675417137146			RNA binding [GO:0003723]	13	0	26.302	53	11.3	13.7	6.6	18.4	6.6	2.6	9.8	6.6	A0A1P8BBW1	A0A1P8BBW1	292	At5g15270	RNA-binding KH domain-containing protein	56;92;160;329			228
263129043579102	24857852935791	271817722320557	237025032043457	intracellular protein transport [GO:0006886]	nucleus [GO:0005634]	Ran GTPase binding [GO:0008536]	21	0	49.863	89	2.8	2.8	1	2.1	1	0	1	2.8	A0A1P8BC62	A0A1P8BC62	294	At5g06120	ARM repeat superfamily protein	1017	298
NaN	246410255432129	NaN	239511814117432			FAD binding [GO:0071949];oxidoreductase activity [GO:0016491]	12	0	11.105	26	1.4	3.4	1.4	2.9	4.3	4.3	4.3	4.3	A0A1P8BCJ3	A0A1P8BCJ3	295	At5g44380	FAD-binding Berberine family protein		244
26331371307373	262699756622314	264145622253418	261724166870117	pentose-phosphate shunt, non-oxidative branch [GO:0009052]		ribose-5-phosphate isomerase activity [GO:0004751];transferase activity [GO:0016740]	4	0	25.575	26	11.3	11.3	16.9	11.3	11.3	8	16.9	11.3	A0A1P8BDP5	A0A1P8BDP5	299	MFC16.20	NagB/RpiA/CoA transferase-like superfamily protein
26952938079834	265190238952637	267724094390869	269991645812988	chloroplast accumulation movement [GO:0009904];microtubule-based movement [GO:0007018]		ATP binding [GO:0005524];microtubule binding [GO:0008017];microtubule motor activity [GO:0003777]	35	0	42.543	87	12.5	11.3	10	10.3	16.7	17.6	17	13.4	A0A1P8BDP7	A0A1P8BDP7	300	KAC2	Kinesin like protein for actin based chloroplast movement 2	163	103;125;501;647;1021;1192
261495742797852	262021541595459	260917835235596	26140495300293	galactose metabolic process [GO:0006012]	integral component of membrane [GO:0016021]	UDP-glucose 4-epimerase activity [GO:0003978]	5	0.00075945	2.6097	8	2.4	2.4	2.4	2.4	2.4	0	2.4	2.4	A0A1P8BDS3	A0A1P8BDS3	301	DUR	NAD(P)-binding Rossmann-fold superfamily protein	277
280590991973877	271543159484863	279203662872314	276116123199463		anaphase-promoting complex [GO:0005680];integral component of membrane [GO:0016021]	ligase activity [GO:0016874]	8	0	5.7995	33	2.5	2.4	2.1	2.1	1.1	1.5	1.5	1.9	A0A1P8BDT7	A0A1P8BDT7	303	EMB2771	E3 ubiquitin ligase	1589			1596
267471446990967	256553726196289	256672534942627	258583736419678				23	0	34.147	69	4.4	4.7	3.1	4.3	4.9	4.5	5.5	4.4	A0A1P8BDV1	A0A1P8BDV1	304	MQJ2.5	Tetratricopeptide repeat (TPR)-like superfamily protein	985	33;322;535;988
220294818878174	NaN	NaN	227654914855957	protein targeting to peroxisome [GO:0006625]	peroxisomal membrane [GO:0005778]	ATP binding [GO:0005524];ATPase activity [GO:0016887]	5	0	3.5945	19	0.8	0	0.8	0.8	0.8	0.8	0.8	0.8	A0A1P8BDY2	A0A1P8BDY2	305	PEX1	Peroxisome 1
236306762695313	254414539337158	285084686279297	259809589385986		integral component of membrane [GO:0016021]		12	0	20.156	39	1	1.5	3.5	1.5	1	1.5	4	2.5	A0A1P8BE11	A0A1P8BE11	306	At5g52580	RabGAP/TBC domain-containing protein
250527076721191	251126308441162	250676784515381	2497434425354			nucleic acid binding [GO:0003676]	4	0	4.3746	5	1.2	1.2	1.2	1.2	1.2	1.2	1.2	1.2	A0A1P8BE91	A0A1P8BE91	307	SDN3	Small RNA degrading nuclease 3		97			80		78
262973136901855	273913288116455	265731582641602	265983257293701				12	0	29.729	73	13.2	10.4	15.9	14.8	17.2	14.5	17.2	15.6	A0A1P8BEF2	A0A1P8BEF2	308	At5g67385	Phototropic-responsive NPH3 family protein
262166557312012	261488571166992	263779735565186	263693618774414			transferase activity [GO:0016740]	9	0	7.5419	13	2.7	2.7	2.7	1.1	2.7	1.1	2.7	2.7	A0A1P8BER5	A0A1P8BER5	311	MKP11.12	Protein prenylyltransferase superfamily protein	514;641	334
27866792678833	282724418640137	27961353302002	280649681091309		chloroplast [GO:0009507]	isomerase activity [GO:0016853]	13	0	23.986	82	30.9	23.5	23.9	23.9	27.2	27.2	30.5	28.7	A0A1P8BEU1	A0A1P8BEU1	313	At5g27390	Tagatose-6-phosphate ketose/aldose isomerase, putative (Mog1/PsbP/DUF1795-like photosystem II reaction center PsbP family protein)		150;159;179;181;256;261
259159069061279	254436054229736	262978553771973	261391677856445			peptide-methionine (S)-S-oxide reductase activity [GO:0008113]	8	0	45.428	21	26.6	24	24	24	30.6	30.6	20.1	30.6	A0A1P8BF28	A0A1P8BF28	314	PMSR1	Peptidemethionine sulfoxide reductase 1	106	167;207		148
297695903778076	296256828308105	297680130004883	298993721008301			ATP binding [GO:0005524]	102	0	323.31	289	71.9	71	71.3	71.3	74.6	74.7	69.8	71.5	A0A1P8BF32	A0A1P8BF32	315	BIP2	Heat shock protein 70 (Hsp 70) family protein	53;640	92;107;113;117;121;124;133;136;142;144;149;163;165;174;175;177;196;224;225;279;282;291;294;298;348;354;355;364;381;387;393;397;448;459;460;494;529;533;536;543;556;566;567;569;571;586;592;594;598;604;606;612;626;632;634		59;67;93;211;342;343;623			159;164;357;446;554;585
260928516387939	247514419555664	259617729187012	259116859436035				15	0	26.442	50	5.3	2.7	3.4	4.6	4.8	2	2.9	2.9	A0A1P8BF80	A0A1P8BF80	316	MPO12.6	Tudor/PWWP/MBT superfamily protein	222;224	626;800
291273593902588	298712062835693	295010643005371	299475402832031			GTP binding [GO:0005525];GTPase activity [GO:0003924];metal ion binding [GO:0046872];translation elongation factor activity [GO:0003746];translation initiation factor activity [GO:0003743]	5	0	5.2597	15	2.8	1.4	2.8	1.4	5.6	2.8	2.8	2.8	A0A1P8BFE6	A0A1P8BFE6	318	At5g10630	Translation elongation factor EF1A/initiation factor IF2gamma family protein	544	207;208
264530124664307	265175228118896	259513149261475	255982685089111	mannose metabolic process [GO:0006013]		alpha-mannosidase activity [GO:0004559];carbohydrate binding [GO:0030246];metal ion binding [GO:0046872]	2	0	7.6747	42	2.5	2.5	1.6	2.5	2.5	1.6	1.6	2.5	A0A1P8BFL6	A0A1P8BFL6	320	At5g66150	Alpha-mannosidase		211
336401138305664	336834259033203	336652183532715	338616600036621				42	0	323.31	765	69.2	68.1	69.2	69.2	70.4	70.4	69.2	69.2	A0A1P8BG37	A0A1P8BG37	324	HCF136	Photosystem II stability/assembly factor, chloroplast (HCF136)		147;176;178;221;243;338;392;405;410;411		171;417			212;225;317
315927238464355	314734878540039	315409317016602	314980506896973	carbohydrate metabolic process [GO:0005975]		intramolecular transferase activity, phosphotransferases [GO:0016868]	44	0	323.31	605	59	69.9	70.1	70.1	72.9	69.9	72.9	68.8	A0A1P8BGJ0	A0A1P8BGJ0	327	At5g17530	Phosphoglucosamine mutase family protein	533	20;144;154;158;169;170;188;201;273;279;355;384;402;416;429;440;456		23;141;225
24650806427002	NaN	NaN	249888896942139	microtubule-based movement [GO:0007018]	microtubule [GO:0005874]	ATP binding [GO:0005524];microtubule binding [GO:0008017];microtubule motor activity [GO:0003777]	4	0.006758	1.6032	6	1.1	0	0	1.1	0	0	0	0	A0A1P8BGR0	A0A1P8BGR0	329	At5g06670	Kinesin-like protein
257485523223877	257937717437744	259078636169434	256262264251709				3	0	3.2153	8	3.5	5.5	3.5	9.1	9.1	9.1	9.1	9.1	A0A1P8BGX1	A0A1P8BGX1	330	At5g27710	T-box protein
241612339019775	NaN	NaN	248582324981689		nuclear pore [GO:0005643]		20	0	36.305	67	1.1	0	0	1.1	0	1.1	1.1	0	A0A1P8BGZ1	A0A1P8BGZ1	331	EMB3142	Nuclear pore complex protein (DUF3414)	191	60
255445995330811	256632671356201	256615295410156	259848537445068			electron transfer activity [GO:0009055]	4	0	3.5323	11	6.9	2.5	10.5	6.1	8	9.4	6.9	10.5	A0A1P8BGZ7	A0A1P8BGZ7	332	ENODL1	Early nodulin-like protein 1	83;117	67
NaN	242140083312988	244451217651367	25039758682251			serine-type endopeptidase activity [GO:0004252]	3	0	5.9862	12	0	2.3	2.3	2.3	2.3	1	3.4	5.3	A0A1P8BHH8	A0A1P8BHH8	336	MFC16.21	Subtilase family protein
262892608642578	266324253082275	264107189178467	268059959411621				2	0	5.5088	5	8	3.2	8	3.2	8	3.2	3.2	8	A0A1R7T377	A0A1R7T377	337	At5g27560	DUF1995 domain protein, putative (DUF1995)
274896831512451	273962364196777	27411994934082	274364280700684		mitochondrial matrix [GO:0005759]	electron transfer activity [GO:0009055]	13	0	88.754	112	34.4	26.6	29.4	34.4	34.4	42.9	41.5	36.9	A0A1R7T3K7	A0A1R7T3K7	339	ETFBETA	Electron transfer flavoprotein subunit beta	70;99	81;133
NaN	24888973236084	238688182830811	246684989929199		apoplast [GO:0048046]		2	0	6.5675	14	0	4.4	4.4	4.4	0	0	4.4	4.4	A0A2H1ZE31	A0A2H1ZE31	340	ESB1	Dirigent protein
367312545776367	365494079589844	367622833251953	367008399963379	glycine catabolic process [GO:0006546]	mitochondrion [GO:0005739]	aminomethyltransferase activity [GO:0004047];transaminase activity [GO:0008483]	70	0	323.31	2772	87.7	87.7	83	87.7	83	87.7	83	83	A0A2H1ZEA9	A0A2H1ZEA9	341	At1g11860	Aminomethyltransferase	90;103;112;166;236;291	53;66;80;108;110;152;169;179;182;184;215;220;263;268;272;314;333;363;377;378;386;391;395;397;403;411;418;421		89;93;163;295;362;375		90;166	67;75;84;102;178;297;382;412
225138359069824	229862251281738	224222679138184	224667263031006	microtubule-based movement [GO:0007018]		ATP binding [GO:0005524];microtubule binding [GO:0008017];microtubule motor activity [GO:0003777]	4	0.00019146	2.7866	7	2	1.3	2	2	2	2	1.3	2	A0A2H1ZEJ0	A0A2H1ZEJ0	345	At3g45850	P-loop containing nucleoside triphosphate hydrolases superfamily protein	766
260919036865234	269668617248535	260473098754883	261618671417236	translation [GO:0006412]	mitochondrion [GO:0005739];ribosome [GO:0005840]	RNA binding [GO:0003723];structural constituent of ribosome [GO:0003735]	16	0	92.14	66	1.3	3.2	1.3	1.3	1.3	5.4	1.3	1.3	A0A2P2CLF3	A0A2P2CLF3	347	rps3	Ribosomal protein S3	109
314951457977295	313599815368652	31603816986084	317455501556396	ATP synthesis coupled proton transport [GO:0015986]	mitochondrion [GO:0005739];proton-transporting ATP synthase complex, catalytic core F(1) [GO:0045261]	ATP binding [GO:0005524];proton-transporting ATP synthase activity, rotational mechanism [GO:0046933]	45	0	323.31	790	49.1	43.2	47.9	41.4	48.1	50.1	46.5	41.8	A0A2P2CLF9	A0A2P2CLF9	350	atp1	ATP synthase subunit alpha	204;390;456	103;120;134;142;153;177;189;387;394;432;469;476;484;492;500		263;473			105;113;148;493
NaN	25696626663208	252151203155518	25068826675415	regulation of RNA splicing [GO:0043484]	nucleoplasm [GO:0005654];ribonucleoprotein complex [GO:1990904];ribosome [GO:0005840]	RNA binding [GO:0003723]	5	0	11.084	17	5.3	15.4	20.6	5.3	6.1	17.1	0	7.9	A0JQ00	A0JQ00	353	At5g02740	At5g02740	85
292272453308105	286966724395752	291126956939697	2904856300354		cell wall [GO:0005618];vacuole [GO:0005773]		6	0	276.22	135	44	44	35.6	44	44	44	44	40	A0JQ12	A0JQ12	354	At1g76020	At1g76020	53	161;162;172
305808238983154	302954845428467	306027565002441	306154403686523	D-ribose catabolic process [GO:0019303];nucleoside metabolic process [GO:0009116]	chloroplast [GO:0009507];chloroplast nucleoid [GO:0042644];chloroplast stroma [GO:0009570];nucleus [GO:0005634];plastid nucleoid [GO:0042646]	ATP binding [GO:0005524];metal ion binding [GO:0046872];ribokinase activity [GO:0004747]	23	0	308	304	55.4	44.9	53.8	52	55.4	55.4	54.6	50.9	A1A6H3	A1A6H3	355	RBSK	Ribokinase	114;146;280;355	98;107;135;221;224;279;286;291;373					265
239399299621582	242012004852295	240260581970215	241957302093506		nucleus [GO:0005634]	AT DNA binding [GO:0003680]	3	0	13.122	6	6.6	4.4	6.6	4.4	6.6	4.4	4.4	4.4	A1L4X7	A1L4X7	356	AHL14	AT-hook motif nuclear-localized protein 14							1
244598274230957	242216243743896	239504699707031	242537860870361		chloroplast stroma [GO:0009570]	ATP binding [GO:0005524];ATPase activity [GO:0016887]	5	0	5.257	19	10.5	8	6.8	6.8	4.9	8.5	4.9	4.9	A1L4Y1	A1L4Y1	357	GET3B	ATPase GET3B
314265747070313	312363185882568	313504753112793	314040050506592	cellular response to oxidative stress [GO:0034599];response to high light intensity [GO:0009644]	cytoplasm [GO:0005737];cytosol [GO:0005829];plastid [GO:0009536]	AU-rich element binding [GO:0017091];NADPH:quinone reductase activity [GO:0003960]	32	0	318.16	453	61.3	48.8	61.3	55.9	58.6	59.1	60.8	56.4	A1L4Y4	A1L4Y4	358	At5g61510	At5g61510	268;310;360	99;109;116;118;264;275;290;301;305;312;380					139;145;162
279542694091797	281476345062256	27881103515625	280190315246582	heat acclimation [GO:0010286];negative regulation of gene silencing [GO:0060969];regulation of cellular response to heat [GO:1900034];regulation of mitotic chromosome decondensation [GO:1901651];response to heat [GO:0009408]	chromocenter [GO:0010369];nucleolus [GO:0005730]		22	0	96.737	151	22.8	20.3	23.7	29.3	26.5	28.8	27.4	27.9	A2RVJ8	A2RVJ8	359	HIT4	Protein HEAT INTOLERANT 4	197	16;91;96;97;112;117;135;144;246;247;288;293;364;382;383
NaN	24334358215332	NaN	250222110748291	RNA processing [GO:0006396]	cytoplasm [GO:0005737];nuclear exosome (RNase complex) [GO:0000176];plastid [GO:0009536]	RNA binding [GO:0003723]	6	0	7.9096	22	0	5.2	0	5.2	5.2	5.2	5.2	5.2	A2RVT9	A2RVT9	362	At5g38890	AT5G38890 protein		61
285075244903564	2847900390625	28561071395874	284485282897949				16	0	102.01	191	37.8	28.2	35.7	38	37.8	38.3	41.8	43.8	A2RVV4	A2RVV4	363	MRI1.6	At5g57700	25	54;97;174;312;325
264834995269775	261373710632324	26469066619873	259867649078369	one-carbon metabolic process [GO:0006730];photorespiration [GO:0009853];tetrahydrofolate interconversion [GO:0035999]	cytosol [GO:0005829];mitochondrion [GO:0005739]	methenyltetrahydrofolate cyclohydrolase activity [GO:0004477];methylenetetrahydrofolate dehydrogenase (NADP+) activity [GO:0004488]	9	0	11.112	58	10.5	8.8	22.4	13.6	24.1	24.1	24.1	21.9	A2RVV7	A2RVV7	364	FOLD1	Bifunctional protein FolD 1, mitochondrial	208
256874446868896	26197624206543	260201549530029	266263103485107				4	0	33.963	10	13.1	17.3	14.9	17.3	9.5	4.2	4.2	9.5	A2RVW1	A2RVW1	365	At4g33480	At4g33480	161;175;179;236
281233196258545	279725704193115	279966888427734	279802742004395	histone H3-R17 methylation [GO:0034971];histone H3-R2 methylation [GO:0034970];histone H3-R26 methylation [GO:0034972];peptidyl-arginine methylation, to asymmetrical-dimethyl arginine [GO:0019919];regulation of flower development [GO:0009909];vegetative to reproductive phase transition of meristem [GO:0010228]	chloroplast [GO:0009507];cytoplasm [GO:0005737];nucleus [GO:0005634]	[myelin basic protein]-arginine N-methyltransferase activity [GO:0016277];histone-arginine N-methyltransferase activity [GO:0008469];protein heterodimerization activity [GO:0046982];protein homodimerization activity [GO:0042803];protein-arginine omega-N asymmetric methyltransferase activity [GO:0035242];protein-arginine omega-N monomethyltransferase activity [GO:0035241]	25	0	65.746	153	33.3	29.9	33.3	27.5	22.5	25.6	25	29.9	A3KPF2	A3KPF2	366	PRMT14	Probable histone-arginine methyltransferase 1.4	75;108;114;385	97;105;115;226;242;244;483		128
235060329437256	252315464019775	NaN	250428085327148		spliceosomal complex [GO:0005681]		11	0	24.361	21	5.9	2.6	0	2.6	4.2	2.6	2.6	4	A3KPF3	A3KPF3	367	At3g02710	ARM repeat superfamily protein
NaN	28653657913208	269626770019531	268799362182617		chloroplast [GO:0009507]		1	0.010011	1.4614	20	0	1.4	1.4	1.4	1.4	1.4	0	1.4	A3KPF8	A3KPF8	368	At1g79080	Pentatricopeptide repeat-containing protein At1g79080, chloroplastic
242725582122803	244129314422607	NaN	247323131561279	mRNA splicing, via spliceosome [GO:0000398]	catalytic step 2 spliceosome [GO:0071013];extracellular region [GO:0005576]		9	0	13.471	49	2.1	2.1	2.1	4	4	2.1	4	4	A4FVN8	A4FVN8	369	At1g10580	At1g10580		327;392;393;434					389
243946018218994	NaN	NaN	239026069641113	phosphatidylethanolamine biosynthetic process [GO:0006646];protein autoprocessing [GO:0016540]	cytosol [GO:0005829];endoplasmic reticulum [GO:0005783];endoplasmic reticulum membrane [GO:0005789]	calcium ion binding [GO:0005509];phosphatidylserine decarboxylase activity [GO:0004609]	9	0	4.3225	21	6.8	0	0	6.8	6.8	6.8	0	6.8	A4GNA8	A4GNA8	370	PSD3	Phosphatidylserine decarboxylase proenzyme 3
NaN	257786884307861	266805667877197	NaN	mRNA export from nucleus [GO:0006406];negative regulation of flower development [GO:0009910];negative regulation of protein sumoylation [GO:0033234];poly(A)+ mRNA export from nucleus [GO:0016973];protein import into nucleus [GO:0006606];regulation of gene silencing [GO:0060968];stamen development [GO:0048443]	cytosol [GO:0005829];mitochondrion [GO:0005739];nuclear envelope [GO:0005635];nuclear membrane [GO:0031965];nuclear pore [GO:0005643];nucleolus [GO:0005730];plasmodesma [GO:0009506]	structural constituent of nuclear pore [GO:0017056]	44	0	108.09	100	0.5	1.2	0.8	0	1.3	0.3	0	0.8	A4GSN8	A4GSN8	371	NUA	Nuclear-pore anchor	1021	141;146;162;187;1172
293324699401855	288193378448486	287668609619141	283154888153076	proteolysis [GO:0006508]	vacuole [GO:0005773]	carboxypeptidase activity [GO:0004180];dipeptidyl-peptidase activity [GO:0008239];serine-type peptidase activity [GO:0008236]	21	0	22.423	14	27	21.4	25.5	25.1	31.3	24.3	30.3	28.2	A4VCL8	A4VCL8	372	At4g36190	At4g36190	195;283;372;430;433;480	107;122;189;241;373;400;416		405
314335060119629	318226680755615	315697326660156	317077960968018	carbohydrate metabolic process [GO:0005975]	cytosol [GO:0005829];secretory vesicle [GO:0099503];vacuole [GO:0005773]	beta-N-acetylhexosaminidase activity [GO:0004563];hexosaminidase activity [GO:0015929];N-acetyl-beta-D-galactosaminidase activity [GO:0102148]	31	0	292.57	386	44.4	39	41.4	34.9	39	43.3	38.1	45.5	A7WM73	A7WM73	373	HEXO1	Beta-hexosaminidase 1	161;295;337;406;511;538	80;182;319;360;408;412		399
205087184906006	214883651733398	NaN	NaN			RNA binding [GO:0003723]	2	0.0023972	2.1339	5	3.2	3.2	0	0	0	3.2	0	0	A8MPR6	A8MPR6	374	ECT6	Evolutionarily conserved C-terminal region 6
237793655395508	NaN	234553813934326	247609100341797			RNA binding [GO:0003723]	9	0	119.07	41	8.9	0	3.2	16.8	5.7	20.7	5.7	9.6	A8MQ78	A8MQ78	375	ALY4	ALWAYS EARLY 4		260
234771671295166	NaN	245887508392334	245681343078613			hydrolase activity [GO:0016787]	12	0	31.139	79	2.4	0	4.8	4.8	2.6	0	0	0	A8MQE3	A8MQE3	377	At5g25770	Alpha/beta-Hydrolases superfamily protein	361	153
26919116973877	254222354888916	270422859191895	271128692626953		integral component of membrane [GO:0016021];nucleus [GO:0005634];plasma membrane [GO:0005886]	ATP binding [GO:0005524];protein kinase activity [GO:0004672]	8	0	8.4883	39	8.6	2.9	4.9	6.4	6.4	4.7	7.1	4	A8MQH3	A8MQH3	378	SRF6	STRUBBELIG-receptor family 6		392;520
255377445220947	253516120910645	253395328521729	254895305633545				3	0	72.752	37	13	13	13	13	20.9	20.9	13	13	A8MQJ8	A8MQJ8	380	At2g37680	Glucose-induced degradation-like protein
274902954101563	279703235626221	274169960021973	281785469055176		nascent polypeptide-associated complex [GO:0005854]		11	0	139.01	81	38.9	30.3	36.5	37.4	30.3	30.3	36.5	23.2	A8MQP6	A8MQP6	381	At4g10480	Nascent polypeptide-associated complex (NAC), alpha subunit family protein		26;72;76;107;121;190;193					125;181
316483459472656	315291557312012	316341743469238	316386680603027			methylmalonate-semialdehyde dehydrogenase (acylating) activity [GO:0004491]	39	0	323.31	602	50.2	42.2	53.6	45.6	45.8	46.6	49.4	48.6	A8MQR6	A8MQR6	382	ALDH6B2	Aldehyde dehydrogenase 6B2	282;312;378	45;52;72;79;83;94;97;295;300;306;309;326;329;345;360;407;475		410			70;86;232;283;492
270972805023193	271030960083008	266169471740723	26666820526123			RNA binding [GO:0003723]	15	0	113.17	80	4.9	8.8	17	13	9.1	7.7	19.5	14.2	A8MR27	A8MR27	385	PTB3	Polypyrimidine tract-binding protein 3	148;243	6;200;316
261946411132813	265788822174072	261934947967529	26246826171875				6	0	48.615	42	13.8	13.8	13.8	13.8	19.8	13.8	19.8	19.8	A8MR72	A8MR72	386	At2g26210	Ankyrin repeat family protein		51;53;100
277470149993896	27202938079834	274150619506836	275544986724854			translation initiation factor activity [GO:0003743]	39	0	244.99	203	9.8	6.8	8.7	9.6	7.3	8.3	9.5	10.7	A8MR97	A8MR97	387	EIF4G	Eukaryotic translation initiation factor 4G	757;909	724;898;1078;1210;1230;1647
235182132720947	221004028320313	22495849609375	245567798614502	nucleosome assembly [GO:0006334]	nucleus [GO:0005634]		37	0	323.31	236	19.3	8.6	6.4	17.2	32.2	28.4	35.1	31.4	A8MRK6	A8MRK6	389	NAP1:2	Nucleosome assembly protein 12	215	5;30;32;71;82;85;93;124;153;156;159;167;182;188;214;219;230;233		99			8;68;192
247982788085938	250811538696289	249242916107178	259672355651855	carbon dioxide transport [GO:0015670];response to salt stress [GO:0009651];response to water deprivation [GO:0009414];water transport [GO:0006833]	anchored component of plasma membrane [GO:0046658];cytosol [GO:0005829];integral component of membrane [GO:0016021];plasma membrane [GO:0005886];vacuole [GO:0005773]	water channel activity [GO:0015250]	6	0	49.27	36	10	3.3	10	12.3	3.3	3.3	3.3	3.3	A8MRW1	A8MRW1	390	PIP1B	Plasma membrane intrinsic protein 1B		4;14
232727012634277	232796592712402	234537506103516	240630760192871	cellular glucose homeostasis [GO:0001678];glycolytic process [GO:0006096]		ATP binding [GO:0005524];glucose binding [GO:0005536];hexokinase activity [GO:0004396]	6	0	4.0839	21	9.2	5.6	12	10.7	13.5	9.9	7.1	10.7	A8MRW9	A8MRW9	391	HXK2	Phosphotransferase
277597045898438	274038124084473	269594745635986	269478206634521	glucosinolate biosynthetic process [GO:0019761]		8-methylthiopropyl glucosinolate S-oxygenase activity [GO:0080107];flavin adenine dinucleotide binding [GO:0050660];N,N-dimethylaniline monooxygenase activity [GO:0004499];NADP binding [GO:0050661]	32	0	159.83	223	19.4	13.5	13.7	14.6	20.9	17.9	26.6	12.2	A8MRX0	A8MRX0	392	FMOGS-OX5	Flavin-containing monooxygenase FMO GS-OX5	169;283	145;190;229;370;378;447		170;413
245540885925293	244627628326416	244576377868652	243195514678955				2	0.0013052	2.3186	9	7.2	7.2	7.2	7.2	3.8	3.8	0	3.8	A8MS42	A8MS42	395	At4g38670	Pathogenesis-related thaumatin superfamily protein	169
28716007232666	287436809539795	288085765838623	288557567596436	acetyl-CoA biosynthetic process from pyruvate [GO:0006086];cell redox homeostasis [GO:0045454];oxidation-reduction process [GO:0055114];response to arsenic-containing substance [GO:0046685]	chloroplast envelope [GO:0009941];chloroplast stroma [GO:0009570];cytosol [GO:0005829];nucleolus [GO:0005730]	dihydrolipoyl dehydrogenase activity [GO:0004148];flavin adenine dinucleotide binding [GO:0050660]	44	0	323.31	272	47.8	42.7	42.5	47.2	50.2	41.9	41.1	40.6	A8MS68	A8MS68	396	LPD1	Dihydrolipoyl dehydrogenase 1, chloroplastic	124;129;400;441	108;111;133;152;178;188;206;208;211;232;239;310;321;329;339;341;344;391;458;463;467;472		363;405;521			449;493
243347682952881	220321769714355	23121883392334	214746685028076	chromatin maintenance [GO:0070827];embryo development ending in seed dormancy [GO:0009793];mRNA transcription by RNA polymerase II [GO:0042789];nucleosome organization [GO:0034728];positive regulation of transcription elongation from RNA polymerase II promoter [GO:0032968];regulation of mRNA processing [GO:0050684];transcription elongation from RNA polymerase II promoter [GO:0006368]	cytosol [GO:0005829];plasmodesma [GO:0009506];transcription elongation factor complex [GO:0008023];transcriptionally active chromatin [GO:0035327]	histone binding [GO:0042393];nucleosome binding [GO:0031491];translation elongation factor activity [GO:0003746]	42	0	189.62	199	0.7	2.5	0.7	1.5	1.9	1.3	3	2.4	A8MS85	A8MS85	397	SPT6	Transcription elongation factor SPT6 homolog	632;1071;1120	257;704
270378952026367	265924911499023	268021793365479	27284538269043		mitochondrial matrix [GO:0005759]		6	0	5.2785	31	17.4	14.5	17.4	22.2	15.5	6.3	9.7	22.2	A8MSD8	A8MSD8	399	At2g41600	Mitochondrial glycoprotein family protein		3;9		176;183	180
25760326385498	251483726501465	256301212310791	256219291687012	cell surface pattern recognition receptor signaling pathway [GO:0002752];cellular response to chitin [GO:0071323];cellular response to molecule of bacterial origin [GO:0071219];defense response to bacterium [GO:0042742];defense response to fungus, incompatible interaction [GO:0009817];detection of molecule of fungal origin [GO:0032491];detection of peptidoglycan [GO:0032499];innate immune respons…	integral component of membrane [GO:0016021];plasma membrane [GO:0005886]	ATP binding [GO:0005524];chitin binding [GO:0008061];chitosan binding [GO:2001080];identical protein binding [GO:0042802];kinase activity [GO:0016301];protein homodimerization activity [GO:0042803];protein kinase activity [GO:0004672];protein self-association [GO:0043621];protein serine/threonine kinase activity [GO:0004674];transmembrane receptor protein kinase activity [GO:0019199]	1	0	3.5337	17	1.8	1.8	1.8	1.8	1.8	1.8	1.8	1.8	A8R7E6	A8R7E6	401	CERK1	Chitin elicitor receptor kinase 1
261561679840088	256052093505859	260422859191895	26387487411499	intracellular protein transport [GO:0006886];retrograde transport, endosome to Golgi [GO:0042147]	cytosol [GO:0005829];Golgi apparatus [GO:0005794];intracellular membrane-bounded organelle [GO:0043231];late endosome [GO:0005770];late endosome membrane [GO:0031902];membrane [GO:0016020];multivesicular body [GO:0005771];retromer complex [GO:0030904];retromer, cargo-selective complex [GO:0030906]		21	0	46.485	69	1	1	1	1	1	1	1	1	A8R7K9	A8R7K9	402	VPS35C	Vacuolar protein sorting-associated protein 35C	131	215;506;514
248099994659424	254735794067383	250841579437256	270204105377197	exonucleolytic trimming to generate mature 3'-end of 5.8S rRNA from tricistronic rRNA transcript (SSU-rRNA, 5.8S rRNA, LSU-rRNA) [GO:0000467];gene silencing by RNA-directed DNA methylation [GO:0080188];histone mRNA catabolic process [GO:0071044];nuclear polyadenylation-dependent antisense transcript catabolic process [GO:0071040];nuclear polyadenylation-dependent CUT catabolic process [GO:0071039…	cytoplasm [GO:0005737];cytosol [GO:0005829];nuclear exosome (RNase complex) [GO:0000176];nucleolus [GO:0005730];nucleus [GO:0005634]	3'-5'-exoribonuclease activity [GO:0000175];nucleotide binding [GO:0000166];single-stranded RNA binding [GO:0003727]	11	0	24.471	33	2.2	2.9	4	2.9	1.1	2.9	2.9	1.7	A9LLI7	A9LLI7	403	RRP6L2	Protein RRP6-like 2
273928852081299	278032283782959	27287712097168	274548950195313	endoplasmic reticulum to Golgi vesicle-mediated transport [GO:0006888];Golgi vesicle docking [GO:0048211];intracellular protein transport [GO:0006886];membrane fusion [GO:0061025];post-embryonic development [GO:0009791];protein exit from endoplasmic reticulum [GO:0032527];transcytosis [GO:0045056];vesicle fusion with Golgi apparatus [GO:0048280]	cytosol [GO:0005829];endoplasmic reticulum [GO:0005783];ER to Golgi transport vesicle membrane [GO:0012507];Golgi apparatus [GO:0005794];Golgi membrane [GO:0000139];Golgi stack [GO:0005795]		35	0	319.31	166	11.8	11.1	14.2	15.3	7.7	6.7	10.5	5.3	B0F9L4	B0F9L4	404	GC6	Golgin candidate 6	344;444;455;456;578	107;362;467;583;694;766;787;790	578	582
296302909851074	299184055328369	296899242401123	297168254852295				12	0	131.46	136	56.5	48.6	56.5	47.2	39.3	47.2	57.5	49.5	B3H4M0	B3H4M0	408	PIFI	Post-illumination chlorophyll fluorescence increase	95;149;164	40;84;125;130		109;136;141
300162448883057	301215171813965	300351181030273	300938339233398			translation initiation factor activity [GO:0003743]	26	0	150.49	259	44.8	45.2	44	45.2	42.1	39.7	44.2	44.8	B3H5L3	B3H5L3	411	At1g73180	Eukaryotic translation initiation factor eIF2A family protein	135;142;305	126;155;159;306;394;410;431;446
327693138122559	325964164733887	327432250976563	327497329711914	branched-chain amino acid biosynthetic process [GO:0009082]		L-isoleucine transaminase activity [GO:0052656];L-leucine transaminase activity [GO:0052654];L-valine transaminase activity [GO:0052655]	33	0	323.31	550	50.9	50.6	50.9	56.7	53.8	50.1	53.3	56.7	B3H658	B3H658	414	BCAT3	Branched-chain-amino-acid aminotransferase	97;164;285;297	96;105;134;138;139;154;185;257;267;275;288;313;323					163;165
21979211807251	207342987060547	222552547454834	23093391418457	nucleosome assembly [GO:0006334]	nucleus [GO:0005634]		31	0	303.56	176	11.4	6.7	8.4	9.7	17.3	25.3	28.1	23.4	B3H684	B3H684	415	NAP1:1	Nucleosome assembly protein11	162;216	5;18;30;71;82;93;120;125;154;163;183;189;220;231;234		99
238161659240723	NaN	240410118103027	241047763824463	methylation [GO:0032259]		methyltransferase activity [GO:0008168]	2	0.0098436	1.4725	2	5.1	0	5.1	5.1	5.1	5.1	5.1	5.1	B3H6G9	B3H6G9	416	At4g02405	S-adenosyl-L-methionine-dependent methyltransferases superfamily protein
249145164489746	252900009155273	249409599304199	249716720581055		integral component of membrane [GO:0016021]		7	0	4.5756	13	1.2	3	3	3	1.2	0	0	3	B3H797	B3H797	419	At4g36210	Transmembrane/coiled-coil protein (DUF726)	54
217197952270508	NaN	NaN	218580989837646	developmental process [GO:0032502];regulation of circadian rhythm [GO:0042752];response to abscisic acid [GO:0009737];response to oxidative stress [GO:0006979];response to water deprivation [GO:0009414];starch metabolic process [GO:0005982]	nucleus [GO:0005634]		2	0	3.0579	9	1.4	0	0	1.4	0	0	0	0	B3H7F6	B3H7F6	420	TIC	Time for coffee
27426944732666	273248310089111	270946655273438	274359512329102	pectin catabolic process [GO:0045490]		metal ion binding [GO:0046872];pectate lyase activity [GO:0030570]	11	0	25.571	63	29.3	13.6	34.7	34.4	31.1	32.6	27.2	26	B3LF89	B3LF89	424	At3g55140	Pectate lyase	11;102;108;191	91;95
302203197479248	30352897644043	302295169830322	302799644470215	cysteinyl-tRNA aminoacylation [GO:0006423];response to cadmium ion [GO:0046686]	cytoplasm [GO:0005737];cytosol [GO:0005829]	ATP binding [GO:0005524];cysteine-tRNA ligase activity [GO:0004817];metal ion binding [GO:0046872]	39	0	310.29	407	41.1	37.2	43.1	45.6	39.9	44.2	32.7	38.7	B3LFA4	B3LFA4	425	At5g38830	Cysteine--tRNA ligase 2, cytoplasmic	34;502	9;61;79;86;129;133;159;356;360;369;397;399;418;471;475;486		87
244957027435303	NaN	245699329376221	247543487548828	positive regulation of shoot apical meristem development [GO:1902185]	nucleus [GO:0005634]	ATP binding [GO:0005524];DNA binding [GO:0003677];DNA-dependent ATPase activity [GO:0008094];helicase activity [GO:0004386]	4	0	6.5487	13	0.4	0	0.4	0.4	0.4	0.4	0	0	B5BT18	B5BT18	426	BTAF1	TATA-binding protein-associated factor BTAF1
297197647094727	291099586486816	295239143371582	29266019821167	embryo development ending in seed dormancy [GO:0009793];plastid transcription [GO:0042793]	chloroplast [GO:0009507];cytosol [GO:0005829]	GTP binding [GO:0005525]	17	0	32.714	102	19	20.7	16.7	17.5	13.9	11.2	12.5	12.7	B5X565	B5X565	430	emb2738	At3g12080		128
267963733673096	268269920349121	266569004058838	267236423492432				9	0	52.442	67	46.1	31.6	37.4	32	61.7	61.7	61.7	54.9	B6EUA5	B6EUA5	432	At1g12250	Pentapeptide repeat-containing protein	196;203	199
308803730010986	308895416259766	309824371337891	310498600006104		cytosol [GO:0005829];plasma membrane [GO:0005886];vacuole [GO:0005773]	hydrolase activity, acting on carbon-nitrogen (but not peptide) bonds, in linear amides [GO:0016811]	31	0	323.31	405	60.4	54.6	62.6	61.1	63.9	60.2	61.1	61.3	B9DFI3	B9DFI3	435	At4g37550	AT4G37550 protein	195;205;212;244;383;384;386	11;15;16;17;67;247;357;369;417;420;430;435;441		240;243;301	244
247305526733398	238642921447754	24783166885376	237908420562744	ATP synthesis coupled electron transport [GO:0042773]	membrane [GO:0016020]	electron transfer activity [GO:0009055];iron-sulfur cluster binding [GO:0051536];NADH dehydrogenase (ubiquinone) activity [GO:0008137]	29	0	213.99	88	3.4	4.7	1.3	3.5	2.1	3	5.1	2.4	B9DFQ9	B9DFQ9	437	EMB1467	AT5G37510 protein	268;335;410;706	84;331;609;667						459
269094200134277	271490898132324	269067859649658	267505989074707	cell wall organization [GO:0071555]	extracellular region [GO:0005576];plant-type cell wall [GO:0009505]	carboxylic ester hydrolase activity [GO:0052689];pectin acetylesterase activity [GO:0052793]	7	0	54.698	36	15.5	16.4	18.2	22.8	18.8	12.2	20.2	29.3	B9DFR3	B9DFR3	438	PAE9	Pectin acetylesterase 9	50;345;349
303401107788086	303702564239502	303852500915527	303367099761963	cysteine biosynthetic process [GO:0019344];cysteine biosynthetic process from serine [GO:0006535];double fertilization forming a zygote and endosperm [GO:0009567];pollen tube development [GO:0048868];pollen tube growth [GO:0009860]	chloroplast [GO:0009507];chloroplast stroma [GO:0009570];cytosol [GO:0005829];mitochondrion [GO:0005739]	ATP binding [GO:0005524];cysteine synthase activity [GO:0004124];lyase activity [GO:0016829];zinc ion binding [GO:0008270]	41	0	323.31	496	62.8	70.7	64.7	60.7	63.7	66.3	62.1	63.5	B9DFR6	B9DFR6	439	OASC	Cysteine synthase	136;150;151	134;154;168;175;218;239;245;263;278;280;302;304;307;325;330;341;369;397					147;161;205;348
236000289916992	237464256286621	236886978149414	NaN	developmental process [GO:0032502];late endosome to vacuole transport [GO:0045324];protein maturation [GO:0051604];protein transport [GO:0015031];seedling development [GO:0090351];vesicle-mediated transport [GO:0016192]	cytosol [GO:0005829];Golgi apparatus [GO:0005794];membrane [GO:0016020];multivesicular body membrane [GO:0032585];retromer complex [GO:0030904]	phosphatidylinositol binding [GO:0035091];phospholipid binding [GO:0005543];protein heterodimerization activity [GO:0046982]	9	0	16.378	25	1.4	1.7	1.4	0	3	1.4	0	0	B9DFS6	B9DFS6	440	SNX2B	Sorting nexin 2B		239
257993659973145	263222541809082	25970552444458	262320957183838			GTP binding [GO:0005525];hydrolase activity [GO:0016787]	2	0.0098522	1.4802	16	1.7	1.7	1.7	1.7	1.7	5.8	1.7	1.7	B9DFZ2	B9DFZ2	441	MCK7.24	AT5G58370 protein
316665744781494	315272922515869	315711345672607	317100563049316	ribosomal small subunit assembly [GO:0000028];translation [GO:0006412]	cytosolic small ribosomal subunit [GO:0022627]	structural constituent of ribosome [GO:0003735]	24	0	323.31	791	57.8	53.7	60.2	60.9	50	56.8	58.5	50.3	B9DG17	B9DG17	442	P40	40S ribosomal protein SA	23;34;152;177	15;32;57;61;93;139;170;172		4;33;47;74;101;114;168			21;22;38;64;116;158
280190849304199	281594734191895	283295860290527	280403537750244			transferase activity, transferring acyl groups [GO:0016746]	9	0	22.653	43	25.1	24.3	29.7	25.1	25.1	22.1	22.1	29.3	B9DG63	B9DG63	443	At4g28030	AT4G28030 protein	162;190	106;173;193
323151931762695	322998580932617	322147445678711	323807182312012	acetate metabolic process [GO:0006083];acetyl-CoA biosynthetic process from acetate [GO:0019427];fatty acid metabolic process [GO:0006631]	chloroplast [GO:0009507];chloroplast stroma [GO:0009570];cytosol [GO:0005829];glyoxysome [GO:0009514]	acetate-CoA ligase activity [GO:0003987];AMP binding [GO:0016208];ATP binding [GO:0005524]	59	0	323.31	890	61	43.7	54.9	55.9	60	56	57.2	58.4	B9DGD6	B9DGD6	444	ACS	Acetyl-coenzyme A synthetase, chloroplastic/glyoxysomal	167;170;208;268;276;438;556;561;598;638	71;115;137;151;173;215;269;280;284;324;444;446;466;586;602;673;700		271			62	268;276
245408515930176	240605220794678	248933773040771	249433326721191				4	0	5.3129	6	21.8	9.5	17.5	12.3	16.7	5.2	4.4	21.8	B9DGS8	B9DGS8	445	At1g14820	AT1G14820 protein
321738204956055	322131805419922	321337547302246	32122444152832	microtubule-based process [GO:0007017]	cytoplasm [GO:0005737];microtubule [GO:0005874]	GTP binding [GO:0005525];GTPase activity [GO:0003924];structural constituent of cytoskeleton [GO:0005200]	53	0	323.31	1476	61.8	63.1	58	61.3	72	63.8	72.2	69.3	B9DGT7	B9DGT7	446	TUBA2	Tubulin alpha-2 chain	4;20;25;118;129;213;305;315;316;347;353;376	60;96;112;124;163;164;166;304;311;326;336;338;352;370;394;401		50;101;102;258;293;356;380	118;347		36;268;301;302;318;377;398;413
269002361297607	270047454833984	272824192047119	271749324798584	thiamine diphosphate biosynthetic process [GO:0009229];thiamine metabolic process [GO:0006772]	cytosol [GO:0005829]	ATP binding [GO:0005524];kinase activity [GO:0016301];thiamine binding [GO:0030975];thiamine diphosphokinase activity [GO:0004788]	10	0	83.605	78	4.5	13.1	19.1	27.7	22.5	24	24	33	B9DGU7	B9DGU7	447	TPK1	Thiamine pyrophosphokinase 1	17	47
31349157333374	313470458984375	312483596801758	312248687744141	methylglyoxal catabolic process to D-lactate via S-lactoyl-glutathione [GO:0019243];response to cadmium ion [GO:0046686]	chloroplast [GO:0009507];cytosol [GO:0005829];extracellular region [GO:0005576]	lactoylglutathione lyase activity [GO:0004462];metal ion binding [GO:0046872]	24	0	323.31	417	65.1	59.6	72.8	72.8	68.5	68.5	63	67.2	B9DH52	B9DH52	448	At1g08110	Lactoylglutathione lyase	186	74;86;89;105;160;184;198;199		164			78;82;101
245845146179199	247602005004883	245126781463623	24583251953125	coenzyme A biosynthetic process [GO:0015937]	cytosol [GO:0005829];nucleus [GO:0005634]	pantothenate kinase activity [GO:0004594]	15	0	10.11	15	17.7	17.5	12.2	21.3	25.2	23.5	33	26	B9DH75	B9DH75	449	At2g17320	AT2G17320 protein	18;328;352	327;332;355
240796890258789	240233535766602	244066543579102	232983798980713	endoplasmic reticulum membrane organization [GO:0090158];endoplasmic reticulum-plasma membrane tethering [GO:0061817];intracellular transport [GO:0046907];viral process [GO:0016032]	endoplasmic reticulum membrane [GO:0005789];extracellular region [GO:0005576];integral component of membrane [GO:0016021];plasma membrane [GO:0005886]		2	0.0048886	1.8544	16	2.3	2.3	2.3	2.3	2.3	2.3	2.3	2.3	B9DHD7	B9DHD7	451	PVA22	Vesicle-associated protein 2-2	82
30380407333374	30274866104126	304115505218506	306435794830322	microtubule-based process [GO:0007017]	cytoplasm [GO:0005737];microtubule [GO:0005874]	GTP binding [GO:0005525];GTPase activity [GO:0003924];structural constituent of cytoskeleton [GO:0005200]	45	0	323.31	551	63.8	58.4	57.8	62.4	73.6	65.8	72.4	70	B9DHQ0	B9DHQ0	453	TUBA5	Tubulin alpha-5 chain	118;129;305;315;316;347;353;376	96;112;124;163;164;166;280;304;311;326;336;338;352;370;394;401;430		101;102;293;356;380;381			268;301;302;318;377;398;413
269282970428467	263729515075684	26846851348877	267417545318604		integral component of membrane [GO:0016021];plasma membrane [GO:0005886]	ATP binding [GO:0005524];protein serine/threonine kinase activity [GO:0004674]	9	0	15.894	49	3.1	2.8	4.9	3.1	4.4	4.1	4.9	4.1	C0LGD7	C0LGD7	454	At1g06840	Probable LRR receptor-like serine/threonine-protein kinase At1g06840		45;483
271671047210693	274797744750977	267554454803467	268700904846191		integral component of membrane [GO:0016021];membrane [GO:0016020];plasma membrane [GO:0005886]	ATP binding [GO:0005524];protein serine/threonine kinase activity [GO:0004674]	4	0.00094056	2.4799	26	1.7	0.8	0.8	0.8	1.7	3.1	3.1	1.7	C0LGE4	C0LGE4	455	At1g12460	Probable LRR receptor-like serine/threonine-protein kinase At1g12460	307	311					305
262862682342529	25945499420166	261861248016357	258659915924072	protein autophosphorylation [GO:0046777]	integral component of membrane [GO:0016021];plasma membrane [GO:0005886]	ATP binding [GO:0005524];protein serine/threonine kinase activity [GO:0004674]	8	0	8.9923	25	4.3	3.1	7	6.1	4.3	3.3	5.3	4.2	C0LGG8	C0LGG8	456	At1g53430	Probable LRR receptor-like serine/threonine-protein kinase At1g53430	401
260388374328613	256909103393555	261758270263672	26318603515625	protein autophosphorylation [GO:0046777]	integral component of membrane [GO:0016021];plasma membrane [GO:0005886]	ATP binding [GO:0005524];protein serine/threonine kinase activity [GO:0004674]	6	0	14.433	32	0.9	4.2	0.9	0.9	0.9	0.9	0.9	2.9	C0LGH3	C0LGH3	457	At1g56140	Probable LRR receptor-like serine/threonine-protein kinase At1g56140	430	290
267956314086914	269249038696289	272480754852295	272628440856934	jasmonic acid and ethylene-dependent systemic resistance [GO:0009861];protein autophosphorylation [GO:0046777];regulation of innate immune response [GO:0045088]	cytosol [GO:0005829];integral component of membrane [GO:0016021];plasma membrane [GO:0005886];plasmodesma [GO:0009506]	ATP binding [GO:0005524];protein serine/threonine kinase activity [GO:0004674]	16	0	35.216	70	7.8	5.5	7.9	9.7	10	7.7	10.7	9.1	C0LGN2	C0LGN2	459	LRR-RLK	Probable leucine-rich repeat receptor-like serine/threonine-protein kinase At3g14840	776	535;572
267799415588379	27043851852417	273776588439941	27887451171875	actin filament bundle assembly [GO:0051017]		actin filament binding [GO:0051015]	10	0	8.5699	56	7.1	9	8.5	10.5	10.5	10.5	10.5	13.1	C0Z268	C0Z268	461	FIM1	AT4G26700 protein	456
260971984863281	274410266876221	26974760055542	268877410888672		chloroplast [GO:0009507]	ferredoxin-NADP+ reductase activity [GO:0004324]	44	0	11.126	32	90.2	89.4	90.2	89.4	89.4	89	89.4	89.4	C0Z2A8	C0Z2A8	464	FNR2	Ferredoxin--NADP reductase, chloroplastic	55;73;78;213	26;29;57;70;87;94;100;124;129;161;163;182;185;204;205;216;220;241;242;245;246		27;48;63;103;167;180;207		213	96;98;108;125;160;186;192;212;218;226
279596405029297	27580753326416	279561538696289	276217060089111		cytosol [GO:0005829];extracellular region [GO:0005576];plasma membrane [GO:0005886]	hydrolase activity [GO:0016787]	10	0	38.334	85	29.3	17.8	24.4	24.4	37.6	29.8	38	38	C0Z2J1	C0Z2J1	465	At1g11360	AT1G11360 protein	145;185;187	6;13;103
225792045593262	249628753662109	222415313720703	NaN		nucleus [GO:0005634]	DNA binding [GO:0003677]	3	0.0048913	1.8599	17	13	7.5	13	0	7.5	7.5	7.5	7.5	C0Z2P1	C0Z2P1	466	At1g74840	AT1G74840 protein
286697959899902	285108089447021	285675048828125	286834812164307	chaperone cofactor-dependent protein refolding [GO:0051085];protein folding [GO:0006457];protein refolding [GO:0042026]	chloroplast [GO:0009507];chloroplast stroma [GO:0009570];cytosol [GO:0005829];cytosolic ribosome [GO:0022626];mitochondrion [GO:0005739];plastid [GO:0009536]	ATP binding [GO:0005524]	79	0	323.31	343	59.8	58.1	58.1	59.6	54.3	65.2	58.1	58.3	C0Z361	C0Z361	468	CPN60B3	Chaperonin 60 subunit beta 3, chloroplastic	262;268;467;555;556;572	66;73;85;94;123;131;173;176;183;184;222;275;276;316;322;327;335;372;377;393;400;412;414;421;440;442;443;454;475;480;496;497;504;508;520;528;537;551		102;513			243;542;569
NaN	224443778991699	243558864593506	219252796173096		cytosol [GO:0005829]	metal ion binding [GO:0046872];metalloendopeptidase activity [GO:0004222]	39	0	226.35	149	0	1.7	3.4	0.9	11.3	6.1	11.6	4.3	F4HNU6	F4HNU6	519	At1g06900	Nardilysin-like	220;227;557;578;718;785;793;863;990	16;232;506;571;678;688;691;784;952;970
264297714233398	241573066711426	269583683013916	NaN			alcohol dehydrogenase (NAD+) activity [GO:0004022];oxidoreductase activity [GO:0016491];oxidoreductase activity, acting on the CH-OH group of donors, NAD or NADP as acceptor [GO:0016616]	10	0	35.441	36	2.8	3.4	2.8	0	0	0	0	0	F4HQ07	F4HQ07	523	At1g66800	NAD(P)-binding Rossmann-fold superfamily protein		234;292;302;313
270463523864746	272209415435791	271153526306152	270692768096924	peptidyl-serine phosphorylation [GO:0018105];peptidyl-threonine phosphorylation [GO:0018107]	cytoplasm [GO:0005737];cytosol [GO:0005829];plasma membrane [GO:0005886]	ATP binding [GO:0005524];protein serine/threonine kinase activity [GO:0004674]	14	0	49.915	36	1.1	1.1	1.1	1.1	1.1	1.1	1.1	1.1	F4HQ88	F4HQ88	525	At1g73460	Protein kinase superfamily protein		287
259066715240479	257639274597168	259905128479004	262160835266113	flower development [GO:0009908];histone methylation [GO:0016571];negative regulation of flower development [GO:0009910];transcription elongation from RNA polymerase II promoter [GO:0006368]	Cdc73/Paf1 complex [GO:0016593];nucleus [GO:0005634];transcriptionally active chromatin [GO:0035327]	chromatin binding [GO:0003682];RNA polymerase II complex binding [GO:0000993]	7	0	6.3469	20	2	2	2	2	4.1	2	2	2	F4HQA1	F4HQA1	526	VIP2	Protein PAF1 homolog
272459030151367	272792339324951	27109884262085	269133071899414			hydrolase activity [GO:0016787]	8	0	12.366	42	14.4	14.1	21.9	15.9	23.3	15.9	23.3	14.4	F4HQA8	F4HQA8	527	FHY1	Haloacid dehalogenase-like hydrolase (HAD) superfamily protein	119;237;247	117
312075176239014	311191673278809	31238712310791	31310079574585		cell wall [GO:0005618];cytosol [GO:0005829];mitochondrion [GO:0005739];nucleus [GO:0005634];plasma membrane [GO:0005886];plasmodesma [GO:0009506]	ATP binding [GO:0005524]	116	0	323.31	732	87.5	84.7	87.8	86.8	86.6	83.9	86	81.9	F4HQD4	F4HQD4	528	HSP70-15	Heat shock 70 kDa protein 15	13;40;140;141;268;287;368;373;377;710;740;781	44;61;68;85;126;131;215;219;245;247;251;259;270;272;273;292;299;320;349;357;385;434;474;519;524;562;571;576;577;580;581;595;601;605;620;623;636;640;679;684;685;695;724;733;735;750;759;771;773;779;787;789;793;800		28;240;364;412;417;554;624;712			57;58;118;120;121;334;347;520;540;566;609;616;633
231802711486816	NaN	241426582336426	NaN	intracellular protein transport [GO:0006886];vesicle-mediated transport [GO:0016192]	COPI-coated vesicle membrane [GO:0030663];Golgi membrane [GO:0000139];membrane coat [GO:0030117]	structural molecule activity [GO:0005198]	41	0	243.76	126	2.4	2.1	2.9	0.9	0.9	0.9	3.5	2.9	F4HQE7	F4HQE7	529	At1g79990	Coatomer subunit beta'	190;351;689;825	168;199;212;359;412;416;658;671;720					678
313123550415039	308263111114502	314491882324219	308440093994141	chloroplast rRNA processing [GO:1901259];regulation of RNA metabolic process [GO:0051252]	chloroplast [GO:0009507];chloroplast envelope [GO:0009941];chloroplast stroma [GO:0009570];chloroplast thylakoid membrane [GO:0009535];nucleus [GO:0005634];plastid [GO:0009536];ribonucleoprotein complex [GO:1990904]	mRNA binding [GO:0003729];RNA binding [GO:0003723]	25	0	150.77	293	47.6	52.4	53.1	52	47.3	47.6	47.6	48.3	F4HQH8	F4HQH8	530	At1g01080	RNA-binding (RRM/RBD/RNP motifs) family protein	108;113	85;92;98;103;104;204;205;214;235		200;274			157;188
338668251037598	339494209289551	339245071411133	339305992126465			nucleotide binding [GO:0000166];oxidoreductase activity, acting on the aldehyde or oxo group of donors, NAD or NADP as acceptor [GO:0016620]	70	0	323.31	1302	88.4	88.4	88.4	88.4	88.4	88.4	88.4	88.4	F4HQT1	F4HQT1	531	GAPC2	Glyceraldehyde-3-phosphate dehydrogenase C2		4;5;59;64;66;69;76;109;111;117;121;122;170;191;195;203;227;235;236;239;245;247;274;282;285;309		11;181;201;266;292			45;48;169;207;246;307
220240459442139	221091041564941	NaN	NaN				12	0	25.408	62	3.9	1.9	0	0	1.9	0	0	1.9	F4HQZ1	F4HQZ1	532	At1g19880	Regulator of chromosome condensation (RCC1) family protein		273;442
297123050689697	296885089874268	291261291503906	290221576690674				23	0	160.2	179	42.5	36.2	42.7	41.2	32.8	36.2	33.1	37.9	F4HR91	F4HR91	533	At1g33610	Leucine-rich repeat (LRR) family protein	68;353;449	128;276;281;356;418;430					201;357
227334098815918	234235496520996	233583698272705	235299339294434				1	0.0013077	2.3395	6	5.9	5.9	5.9	5.9	5.9	5.9	5.9	5.9	F4HRD2	F4HRD2	534	At1g45230	DCL protein (DUF3223)
227313804626465	22266393661499	219873886108398	227884750366211				3	0	9.5236	16	4	4	4	4	4	0	4	4	F4HRG2	F4HRG2	535	At1g53345	DHHA1 domain protein
256113872528076	249715404510498	276982307434082	26978364944458	carbohydrate metabolic process [GO:0005975];ethylene biosynthetic process [GO:0009693];regulation of ethylene biosynthetic process [GO:0010364];regulation of leaf senescence [GO:1900055];starch metabolic process [GO:0005982];trehalose metabolic process [GO:0005991]	cytosol [GO:0005829]		24	0	65.442	66	0.7	0.4	0.4	1.1	1.7	1.4	0.8	0.4	F4HRS2	F4HRS2	537	SWEETIE	Protein SWEETIE	129;630						1040
271600017547607	276643810272217	274532470703125	274306964874268	nucleus organization [GO:0006997];regulation of nucleus size [GO:0097298]	cytoplasmic chromatin [GO:0000789];cytosol [GO:0005829];mitochondrion [GO:0005739];nuclear envelope [GO:0005635];nuclear lamina [GO:0005652];nuclear membrane [GO:0031965];nuclear periphery [GO:0034399];nucleoplasm [GO:0005654];nucleus [GO:0005634]		30	0	110.28	97	1.3	2.2	2.4	2.4	2.5	1.8	1.3	2.5	F4HRT5	F4HRT5	538	CRWN1	Protein CROWDED NUCLEI 1		6;55;114;227;452;457;534;562;564;998					1
30650785446167	304234218597412	305088081359863	304629497528076	carbohydrate metabolic process [GO:0005975];glycerol-3-phosphate metabolic process [GO:0006072]		glycerol kinase activity [GO:0004370]	47	0	323.31	625	58.3	65.8	63.5	64.9	67.8	66	61.2	62.4	F4HS76	F4HS76	539	NHO1	Actin-like ATPase superfamily protein	61;136;239;252;265;375;396;468	3;64;68;81;97;123;160;206;240;271;384;408;413;420;444;449;469		5;418			260;395
298533496856689	298217258453369	298648166656494	302942790985107		cytoplasm [GO:0005737];cytosol [GO:0005829];extracellular region [GO:0005576];nucleus [GO:0005634]		49	0	161.2	282	21	18.9	21.1	23.8	17.8	17.6	21.8	21.8	F4HS99	F4HS99	540	At1g01320	Tetratricopeptide repeat (TPR)-like superfamily protein	62;90;117;120;242;458;557	20;41;132;137;265;409;413;424;434;511;512;530;852;888;1081;1145;1151;1164					710
NaN	228199310302734	NaN	242932662963867	tRNA pseudouridine synthesis [GO:0031119]		pseudouridine synthase activity [GO:0009982];RNA binding [GO:0003723]	8	0	17.903	30	0	3.4	0	7.9	5	0	3.4	1.6	F4HSS8	F4HSS8	543	At1g20410	Pseudouridine synthase family protein		230;356
253642616271973	25902193069458	250129089355469	256232147216797	negative regulation of defense response to bacterium, incompatible interaction [GO:1902478]		GTP binding [GO:0005525]	5	0	14.688	24	7.3	9.6	7	9.4	10.2	10.2	12.6	12.6	F4HT21	F4HT21	545	IAN9	Immune-associated nucleotide-binding protein 9	63
247458114624023	241606178283691	245663356781006	248727684020996	DNA replication initiation [GO:0006270]	alpha DNA polymerase:primase complex [GO:0005658];mitochondrion [GO:0005739]	DNA binding [GO:0003677]	14	0	30.691	36	1.3	1.3	2.6	3.2	2.6	1.9	0	4.4	F4HTP2	F4HTP2	546	POLA2	DNA polymerase alpha subunit B	259;260
239291324615479	237616214752197	239365196228027	240779800415039				3	0	5.6952	16	1.5	1.5	4.4	4.4	1.5	4.4	1.5	4.4	F4HTR6	F4HTR6	548	At1g67800	Copine (Calcium-dependent phospholipid-binding protein) family
304814491271973	290637092590332	303581485748291	303134365081787		chloroplast [GO:0009507];chloroplast thylakoid [GO:0009534];mitochondrion [GO:0005739]	peptidyl-prolyl cis-trans isomerase activity [GO:0003755]	19	0	261.34	180	43.2	43.5	41	40.4	41.3	41.3	35	43.8	F4HTT6	F4HTT6	549	CYP26-2	Peptidyl-prolyl cis-trans isomerase CYP26-2, chloroplastic	187	93;131;143;191;263;283;288					258
252930908203125	250031604766846	251676406860352	242504634857178	endoplasmic reticulum to Golgi vesicle-mediated transport [GO:0006888]	cytoplasm [GO:0005737];mitochondrion [GO:0005739];nucleus [GO:0005634];TRAPP complex [GO:0030008]		4	0	5.8748	12	11.1	11.1	11.1	20	11.1	8.9	11.1	11.1	F4HTY0	F4HTY0	550	At1g80500	SNARE-like superfamily protein	6	126
286811695098877	287285175323486	286609516143799	287020664215088	acyl-CoA metabolic process [GO:0006637];fatty acid catabolic process [GO:0009062]	peroxisome [GO:0005777]	acyl-CoA hydrolase activity [GO:0047617]	20	0	64.273	207	41	31.1	39.8	46.1	39.3	39.6	37.2	32.1	F4HU51	F4HU51	551	At1g01710	Acyl-CoA thioesterase II	111;296	25;26;34;38;400
286251258850098	NaN	28670202255249	273478164672852	peptidyl-lysine monomethylation [GO:0018026]		protein-lysine N-methyltransferase activity [GO:0016279]	7	0	12.231	36	5.2	0	3	3.7	3.8	3.8	3.8	3.8	F4HU79	F4HU79	552	At1g01920	SET domain-containing protein							1
272407264709473	274277439117432	272616786956787	270983848571777	RNA catabolic process [GO:0006401]	extracellular region [GO:0005576];secretory vesicle [GO:0099503]	endoribonuclease activity [GO:0004521];ribonuclease T2 activity [GO:0033897];RNA binding [GO:0003723]	12	0	59.881	120	29.6	14.2	19	14.6	35.2	23.1	32	36	F4HUG9	F4HUG9	554	At1g14210	Ribonuclease T2 family protein	92;124;174;184;211;219	96;144;217;222;224
238763332366943	NaN	240924072265625	NaN	fatty acid metabolic process [GO:0006631]	peroxisome [GO:0005777]	ligase activity [GO:0016874]	8	0	7.277	32	1.4	0	1.4	0	4.7	3.1	3.8	1.6	F4HUK6	F4HUK6	555	AAE1	Probable acyl-activating enzyme 1, peroxisomal	507
308723220825195	NaN	293176250457764	294652690887451				10	0	6.5554	19	1.6	0.9	2.5	2.5	0.8	1.6	1.6	2.5	F4HV50;REV__F4HV50	F4HV50	557	At1g47900	Filament-like protein (DUF869)	815;894	282;293		303			304
239260578155518	255785655975342	NaN	NaN		plasma membrane [GO:0005886]	mRNA binding [GO:0003729]	14	0	36.352	15	16.5	15.8	14.9	14.9	16	16.3	15.6	14.7	F4HV67	F4HV67	558	UBP1A	Oligouridylate-binding protein 1A		99;188		211;214			184;213
252630939483643	268266296386719	257215328216553	265631675720215			ATP binding [GO:0005524];helicase activity [GO:0004386];nucleic acid binding [GO:0003676]	50	0	243.24	100	59	70.5	66.6	64.9	58	63.4	56.5	58.5	F4HV96	F4HV96	559	EIF4A-2	Eif4a-2	69;136;176	56;70;120;132;178;194;227;231;238;248;285;292;370		310			44;122;179;188;217;293;307;384
258561916351318	263085880279541	263340682983398	260444145202637	detection of redox state [GO:0051776];photosystem stoichiometry adjustment [GO:0080005];protein autophosphorylation [GO:0046777];regulation of gene expression [GO:0010468];regulation of photosynthesis [GO:0010109]	chloroplast [GO:0009507];chloroplast stroma [GO:0009570]	kinase activity [GO:0016301];protein histidine kinase activity [GO:0004673];protein self-association [GO:0043621];quinone binding [GO:0048038]	7	0	36.094	33	8.2	13.7	10	12.4	9.7	5.1	11.1	6.5	F4HVG8	F4HVG8	560	CSK	Chloroplast sensor kinase, chloroplastic	121
242548656463623	201417083740234	216000499725342	NaN	regulation of translation [GO:0006417]	CCR4-NOT core complex [GO:0030015]		73	0	323.31	340	0.8	0.4	0.3	0	0.4	0	0	0.6	F4HVV7;REV__F4JCM5	F4HVV7	561	At1g02080	Transcription regulator	47;50;578;645;791;1026;1314;1317;1357	5;583;596;620;696;1036;1046;1155;1302;1358
256021251678467	25329439163208	260362205505371	250871562957764		cytosol [GO:0005829]	mRNA binding [GO:0003729]	11	0	21.479	30	5.5	7.3	5.5	6	4.5	4.5	2.5	2.5	F4HWB0	F4HWB0	563	At1g14710	Hydroxyproline-rich glycoprotein family protein
287152538299561	285928115844727	288926124572754	288110599517822		integral component of membrane [GO:0016021];plasma membrane [GO:0005886];vacuole [GO:0005773]	mRNA binding [GO:0003729]	17	0	26.125	118	7.6	5.6	9.1	10	7.5	7.2	7.3	4.4	F4HWC3	F4HWC3	564	At1g20970	Calponin-like domain protein		812;869
298946533203125	298163032531738	298224716186523	298637542724609	tRNA aminoacylation for protein translation [GO:0006418]	cytosol [GO:0005829]	ATP binding [GO:0005524];tyrosine-tRNA ligase activity [GO:0004831]	39	0	113.02	286	31.8	28.7	29.1	36	29.4	21.5	28.9	25.3	F4HWL4	F4HWL4	566	At1g28350	Tyrosine--tRNA ligase 2, cytoplasmic	39;57;157;219;273;283;417;435;465;597;651;661	52;165;223;313;358;362;459;601;605;677;735;742
258219413757324	255386619567871	254189262390137	NaN			mRNA binding [GO:0003729]	7	0	15.692	17	1.6	1.6	4.1	2.5	0	0	1.6	1.6	F4HWS5	F4HWS5	567	ECT7	Evolutionarily conserved C-terminal region 7		195;439
29330696105957	293012752532959	293632125854492	293001842498779	endosome to plasma membrane protein transport [GO:0099638];multivesicular body organization [GO:0036257];protein transport to vacuole involved in ubiquitin-dependent protein catabolic process via the multivesicular body sorting pathway [GO:0043328];vacuole organization [GO:0007033]	cytoplasm [GO:0005737];cytosol [GO:0005829];late endosome [GO:0005770];multivesicular body [GO:0005771];plasmodesma [GO:0009506]	protein self-association [GO:0043621];ubiquitin binding [GO:0043130]	46	0	280.6	370	32.5	24.6	31.3	28.6	32.5	29.7	27.9	29.3	F4HXZ1	F4HXZ1	569	BRO1	Vacuolar-sorting protein BRO1	700	16;17;51;273;362;376;408;472;498;512;520;587;676		459			384
264423885345459	276172275543213	264622020721436	266261711120605	embryo development ending in seed dormancy [GO:0009793];protein import [GO:0017038];protein targeting [GO:0006605]	chloroplast envelope [GO:0009941];membrane [GO:0016020];plastid [GO:0009536]	ATP binding [GO:0005524];metal ion binding [GO:0046872]	6	0.0013079	2.3436	21	0.8	1.3	0.4	0.4	1.1	1.1	1.1	0	F4HY36	F4HY36	570	SECA2	Protein translocase subunit SecA		464
285710906982422	290807819366455	290113735198975	292952213287354				15	0	77.768	50	5.1	3	3	0.7	2.8	0.7	2.8	0.7	F4HYA7	F4HYA7	571	At1g35220	FAM91 carboxy-terminus protein	838;911	756
NaN	238153839111328	NaN	249859828948975		cytoplasm [GO:0005737];nucleus [GO:0005634];perinuclear region of cytoplasm [GO:0048471]		8	0	21.227	26	0	1.3	0	4.7	1.3	1.3	0	3	F4HYD7	F4HYD7	572	RANBPM	Ran-binding protein M homolog				308
313936100006104	312277965545654	312358627319336	313202323913574	D-cysteine catabolic process [GO:0019447];ethylene biosynthetic process [GO:0009693];response to cadmium ion [GO:0046686]	chloroplast [GO:0009507];cytosol [GO:0005829];mitochondrion [GO:0005739];nucleus [GO:0005634]	cobalt ion binding [GO:0050897];D-cysteine desulfhydrase activity [GO:0019148];hydrolase activity [GO:0016787]	30	0	323.31	444	53.6	56.4	59.6	58.9	61.6	59.4	60.8	59.4	F4HYF3	F4HYF3	573	DCD	Bifunctional D-cysteine desulfhydrase/1-aminocyclopropane-1-carboxylate deaminase, mitochondrial	351	93;145;173;189;191;194;303;305;319;350;356;394;399		73			87;385
277446441650391	265211067199707	273755893707275	281477317810059			ATP binding [GO:0005524]	20	0	8.4414	32	2.6	3.7	3.1	1.1	1.1	1.1	2.5	2.5	F4HZ82	F4HZ82	575	At1g02890	AAA-type ATPase family protein	1157	498;917;992;997;1121
30552978515625	300766086578369	303427619934082	304437160491943		chloroplast [GO:0009507];chloroplast envelope [GO:0009941];chloroplast stroma [GO:0009570];extracellular region [GO:0005576];mitochondrion [GO:0005739];plastid stroma [GO:0009532];thylakoid [GO:0009579]	serine-type endopeptidase activity [GO:0004252]	18	0	298.47	187	42.4	26.2	40.5	36.8	33.5	37.6	34.3	32.2	F4HZE0	F4HZE0	577	At1g09130	ATP-dependent Clp protease proteolytic subunit	203;212	220;254;269;292;294;309;322;327					282
247372226715088	NaN	249626998901367	NaN	protein stabilization [GO:0050821];proteolysis [GO:0006508]	mitochondrion [GO:0005739];nucleus [GO:0005634]	aminopeptidase activity [GO:0004177];manganese ion binding [GO:0030145];metallopeptidase activity [GO:0008237];peptidase activity [GO:0008233]	6	0	15.601	39	6.3	2.2	4.3	6.1	11.4	9.1	12.2	12.2	F4HZG9	F4HZG9	578	ICP55	Intermediate cleaving peptidase 55, mitochondrial
250778160095215	241922721862793	246741142272949	22846363067627		vacuole [GO:0005773]		13	0	22.572	45	0.6	1.2	1.7	1.4	0	1.4	0	0.8	F4HZS8	F4HZS8	580	At1g22060	Sporulation-specific protein		1522
257648639678955	252417278289795	257773094177246	257118263244629		host cell nucleus [GO:0042025];nucleus [GO:0005634]	zinc ion binding [GO:0008270]	6	0	13.975	48	4.4	4.4	6.2	6.1	4.4	4.4	5.9	4.4	F4I045	F4I045	582	At1g48950	C3HC zinc finger-like protein	111;267
247702178955078	263506526947021	255020618438721	240329666137695	2-oxoglutarate metabolic process [GO:0006103];aspartate metabolic process [GO:0006531];biosynthetic process [GO:0009058];cellular amino acid metabolic process [GO:0006520];glutamate metabolic process [GO:0006536]	cytoplasm [GO:0005737];cytosol [GO:0005829];nucleus [GO:0005634]	L-aspartate:2-oxoglutarate aminotransferase activity [GO:0004069];pyridoxal phosphate binding [GO:0030170]	19	0	101.64	88	9.1	13.6	9.1	5.7	7.7	9.1	8.6	8.1	F4I0D4;P46646	F4I0D4	583	ASP4	Aspartate aminotransferase;Aspartate aminotransferase, cytoplasmic isozyme 2	104;267	95;123		73			253
270646591186523	267490634918213	274801597595215	270896224975586				9	0	5.2429	39	5.4	4.7	2.5	7.9	5.4	7.9	7.3	4.4	F4I0I6	F4I0I6	584	At1g69030	BSD domain-containing protein	198	6;89
268891353607178	248022289276123	24801736831665	259624347686768	chloroplast organization [GO:0009658];etioplast organization [GO:0009662];plastid transcription [GO:0042793];regulation of transcription, DNA-templated [GO:0006355]	chloroplast nucleoid [GO:0042644];cytoplasm [GO:0005737];plastid-encoded plastid RNA polymerase complex [GO:0000427]	carbohydrate kinase activity [GO:0019200]	3	0	3.3802	13	4.7	4.7	3.3	4.7	2	1.5	2	2.8	F4I0K2	F4I0K2	585	FLN2	Fructokinase-like 2, chloroplastic		574
268889026641846	271708335876465	265271167755127	271114768981934				3	0	10.351	22	11.3	11.3	11.3	24.7	11.3	24.7	11.3	11.3	F4I0N7	F4I0N7	586	GASA1	GAST1 protein homolog 1	39;43;81;83	36
281155014038086	279759082794189	283585453033447	284949550628662	leucyl-tRNA aminoacylation [GO:0006429]	chloroplast [GO:0009507];cytosol [GO:0005829];plasmodesma [GO:0009506]	aminoacyl-tRNA editing activity [GO:0002161];ATP binding [GO:0005524];leucine-tRNA ligase activity [GO:0004823]	109	0	323.31	845	20.1	14.3	19.7	20	31.1	38.7	27.1	29	F4I116	F4I116	588	At1g09620	Leucine--tRNA ligase, cytoplasmic	36;92;203;252;449;525;549;576;641;705;741;814;838;863;880;999	6;23;98;103;230;234;272;282;289;413;419;447;453;455;460;462;489;494;498;500;515;544;552;676;718;794;812;821;850;901;912;916;922;923;926;927;938;940;993;997;1006;1007;1034		822			165;480;553;773;843;910
245313034057617	261700687408447	270659942626953	272306842803955		nucleus [GO:0005634]	mRNA binding [GO:0003729]	18	0	237.15	142	11.7	7.3	6.3	10.8	4.9	5.3	2.8	2.8	F4I1G1	F4I1G1	589	At1g29350	RNA polymerase II degradation factor-like protein (DUF1296)	46	5;12;122		424;426			48;539
267628116607666	26373815536499	NaN	265427703857422	histone acetylation [GO:0016573];regulation of DNA demethylation [GO:1901535];regulation of DNA methylation [GO:0044030]			16	0	41.514	64	1.5	3.3	0	3.3	2.7	1.5	1.2	1.5	F4I1S8	F4I1S8	591	ELP2	Elongator protein 2	165;170;217;799;827;832	492					798
236112174987793	234324989318848	NaN	234860343933105	embryo development ending in seed dormancy [GO:0009793];mRNA transport [GO:0051028];protein import into nucleus [GO:0006606];RNA export from nucleus [GO:0006405];zygote asymmetric cell division [GO:0010070]	mitochondrion [GO:0005739];nuclear pore central transport channel [GO:0044613];nuclear pore nuclear basket [GO:0044615]	nuclear localization sequence binding [GO:0008139];structural constituent of nuclear pore [GO:0017056]	2	0	3.6518	7	1.8	1.8	0.9	1.8	0.9	0.9	1.8	1.8	F4I1T7	F4I1T7	592	NUP214	Nuclear pore complex protein NUP214
315258922576904	313012752532959	315913867950439	315976600646973		chloroplast [GO:0009507];cytoplasm [GO:0005737];cytosol [GO:0005829];mitochondrion [GO:0005739]	endopeptidase activity [GO:0004175];oligopeptidase activity [GO:0070012];serine-type endopeptidase activity [GO:0004252];serine-type exopeptidase activity [GO:0070008]	53	0	323.31	848	40.9	37.9	42.9	50.3	53.5	51.9	46.7	49.9	F4I2A0	F4I2A0	593	At1g76140	Prolyl oligopeptidase family protein	128;299;329;338;420;430;488;679;743	94;111;119;131;133;140;228;233;307;390;392;399;445;498;523;527;535;536;762		423;425			530
227762756347656	228658962249756	237978839874268	NaN	embryo development ending in seed dormancy [GO:0009793];mRNA cis splicing, via spliceosome [GO:0045292];regulation of gene expression [GO:0010468]	cytoplasm [GO:0005737];nuclear speck [GO:0016607];nucleus [GO:0005634];spliceosomal complex [GO:0005681]		9	0	8.7913	16	1.5	3.1	1.3	0	0	0	0	2.8	F4I2J8	F4I2J8	595	CTN	Cactin
245737495422363	NaN	NaN	247088298797607	pseudouridine synthesis [GO:0001522];tRNA processing [GO:0008033]		pseudouridine synthase activity [GO:0009982];RNA binding [GO:0003723];tRNA pseudouridine synthase activity [GO:0106029]	4	0	3.1533	10	3.2	0	0	3.8	0	3.8	3.2	3.2	F4I2L0	F4I2L0	596	At1g09800	tRNA pseudouridine synthase	115;212
257331409454346	2622727394104	258145790100098	NaN		cytosol [GO:0005829]	hydrolase activity [GO:0016787]	9	0	6.0555	20	26.6	15.1	13.8	2.2	22.4	21.8	25	30.8	F4I353	F4I353	600	At1g29840	Alpha/beta-Hydrolases superfamily protein	242			43	42
NaN	270456237792969	248616905212402	NaN	megagametogenesis [GO:0009561];ribosome biogenesis [GO:0042254];transcription, DNA-templated [GO:0006351]	cytosol [GO:0005829];RNA polymerase I complex [GO:0005736]	DNA binding [GO:0003677];DNA-directed 5'-3' RNA polymerase activity [GO:0003899];metal ion binding [GO:0046872];ribonucleoside binding [GO:0032549]	10	0	10.095	22	0	0.6	1.3	0	0	0	0	1.3	F4I366	F4I366	601	NRPA2	DNA-directed RNA polymerase I subunit 2
225185966491699	254422149658203	252003765106201	246766986846924	cellular response to heat [GO:0034605];mRNA processing [GO:0006397]	cytoplasmic stress granule [GO:0010494];cytosol [GO:0005829];nucleus [GO:0005634]	mRNA binding [GO:0003729];poly(A) binding [GO:0008143]	14	0	323.31	88	12.6	5.8	10.3	10.1	10.1	10.3	10.3	7.9	F4I3B3	F4I3B3	603	RBP47A	Polyadenylate-binding protein RBP47A	157;280;364	154;244;255;293;362;389		276;371;381;383;413			185;275
296793251037598	298723964691162	296782512664795	296450576782227	response to oxidative stress [GO:0006979]	mitochondrion [GO:0005739];nucleus [GO:0005634];peroxisome [GO:0005777]	oxidoreductase activity [GO:0016491];zinc ion binding [GO:0008270]	31	0	107.99	265	36.2	33.6	37.3	33.7	39.9	31.3	35	31.1	F4I3C3	F4I3C3	604	NQR	ARP protein (REF)	23;71;196;242;482;640	237;238;487;489;492;503;508;605;607;614
316103000640869	315525207519531	316452560424805	31750150680542		chloroplast [GO:0009507];chloroplast stroma [GO:0009570];cytoplasm [GO:0005737];nucleus [GO:0005634]	ATP binding [GO:0005524];ATPase activity [GO:0016887];GTP binding [GO:0005525];ribosomal large subunit binding [GO:0043023];ribosome binding [GO:0043022]	30	0	323.31	480	76.5	67.7	70.8	70.8	76.5	76.5	68.9	65.8	F4I3J0	F4I3J0	605	At1g56050	Obg-like ATPase 1	87;158;250	108;114;141;210;212;217;231;273;346;372;405;410		76;168			243;357
251764183044434	249925231933594	254981708526611	252269248962402	biosynthetic process [GO:0009058];cell division [GO:0051301];chloroplast fission [GO:0010020];chloroplast organization [GO:0009658];regulation of cell shape [GO:0008360]	chloroplast [GO:0009507];chloroplast nucleoid [GO:0042644]	acid-amino acid ligase activity [GO:0016881];ATP binding [GO:0005524]	6	0	7.1713	6	6.6	8.9	9.5	6.3	0	0	0	0	F4I3P9	F4I3P9	607	MURE	UDP-N-acetylmuramoyl-L-alanyl-D-glutamate--2,6-diaminopimelate ligase MurE homolog, chloroplastic	242;316;624
346040496826172	346529884338379	346055946350098	346938972473145	response to cadmium ion [GO:0046686]	apoplast [GO:0048046];chloroplast [GO:0009507];chloroplast envelope [GO:0009941];chloroplast stroma [GO:0009570];cytosol [GO:0005829];nucleus [GO:0005634];plasma membrane [GO:0005886];vacuole [GO:0005773]	metallopeptidase activity [GO:0008237];zinc ion binding [GO:0008270]	119	0	323.31	2778	82.8	79.5	76.4	82.6	80.3	81.9	84.7	80	F4I3R1	F4I3R1	608	At1g63770	Peptidase M1 family protein	213;216;280;406;514;895	92;97;102;130;132;138;152;157;161;164;207;223;245;277;278;308;327;443;479;488;498;560;591;619;678;691;698;714;719;750;757;762;831;843;871;872;886;904;910;921		254;256;900;959			234;430;468;486;521;680;730;732;733;780;802;811;930
314726161956787	314503688812256	315307846069336	314191570281982		mitochondrion [GO:0005739];plasma membrane [GO:0005886]	GTP binding [GO:0005525];GTPase activity [GO:0003924];translation initiation factor activity [GO:0003743]	44	0	323.31	285	18.9	15.8	22.6	21.3	21.5	17.5	18.7	14.9	F4I420	F4I420	609	At1g76810	Eukaryotic translation initiation factor 2 (eIF-2) family protein	708;709;724;1200	532;689;720;757;760;766;853;864;882;983;998;1076;1090;1094;1179;1220;1234;1244;1269;1282					1252
26375904083252	262191886901855	265035190582275	263716411590576			Hsp90 protein binding [GO:0051879]	8	0	11.221	30	17.2	11.4	13.9	9.4	17.2	11.4	13.9	6.7	F4I456	F4I456	610	TPR2	Tetratricopeptide repeat (TPR)-like superfamily protein	172
234126091003418	NaN	NaN	236135807037354		plasma membrane [GO:0005886]	S100 protein binding [GO:0044548];tubulin binding [GO:0015631];ubiquitin protein ligase binding [GO:0031625]	2	0	3.8032	9	4.4	0	0	6.1	6.1	4.4	6.1	10.5	F4I4Q9	F4I4Q9	612	At1g30070	SGS domain-containing protein		121
261266212463379	258198490142822	261621170043945	262708301544189			ATP binding [GO:0005524];protein serine/threonine kinase activity [GO:0004674];protein-containing complex binding [GO:0044877]	14	0	28.246	33	0.7	0.7	0.7	0.7	0.7	0.7	0.7	0.7	F4I4X6	F4I4X6	613	TOR	Serine/threonine-protein kinase TOR	49
270728588104248	271811084747314	273971347808838	272836570739746	ubiquitin-dependent protein catabolic process [GO:0006511]	cytosol [GO:0005829];plasma membrane [GO:0005886]	ATP binding [GO:0005524];ubiquitin-protein transferase activity [GO:0004842]	8	0	26.836	28	40.5	40.5	40.5	40.5	40.5	40.5	35.8	40.5	F4I5B8	F4I5B8	616	UBC28	Ubiquitin-conjugating enzyme 28	127;149	8;11;114;186		123			168;189
284226608276367	283618545532227	283462543487549	284799289703369	DNA repair [GO:0006281];mRNA splicing, via spliceosome [GO:0000398]	Prp19 complex [GO:0000974]	ubiquitin protein ligase activity [GO:0061630]	28	0	91.359	175	32.9	22.6	29.4	31.5	28.5	21.4	25.8	17	F4I5P3	F4I5P3	617	MAC3A	MOS4-associated complex 3A	38;112;183;293	166;167;208;222;306;384		151
242930564880371	NaN	245550842285156	246165561676025	regulation of phosphoprotein phosphatase activity [GO:0043666]	vacuolar membrane [GO:0005774]	protein phosphatase binding [GO:0019903];protein phosphatase regulator activity [GO:0019888]	35	0	205.66	167	1.7	0	1.7	1.7	1.7	1.7	1.7	3.2	F4I6B2	F4I6B2	619	At1g30470	SIT4 phosphatase-associated family protein	38;237;496	52;231;243;453;484;594;662;710;714;787;805
263692626953125	231608638763428	2644580078125	225791130065918	CTP biosynthetic process [GO:0006241];'de novo' CTP biosynthetic process [GO:0044210];glutamine metabolic process [GO:0006541];pyrimidine nucleobase biosynthetic process [GO:0019856]	cytosol [GO:0005829]	ATP binding [GO:0005524];CTP synthase activity [GO:0003883];identical protein binding [GO:0042802]	24	0	78.977	91	2	5.7	2	4.3	2	2	6.3	6.8	F4I6G9	F4I6G9	620	At1g30820	CTP synthase	176;291	81;92;100;195;202;227;347
336323318481445	335875473022461	336208038330078	335848617553711	biosynthetic process [GO:0009058];cellular response to hypoxia [GO:0071456];L-alanine catabolic process, by transamination [GO:0019481];response to cadmium ion [GO:0046686];response to hypoxia [GO:0001666]	mitochondrion [GO:0005739];nucleus [GO:0005634]	ATP binding [GO:0005524];L-alanine:2-oxoglutarate aminotransferase activity [GO:0004021];pyridoxal phosphate binding [GO:0030170]	48	0	323.31	1108	58.6	56.2	53.2	51.7	54.9	55.8	51.7	52.1	F4I7I0	F4I7I0	623	ALAAT1	Alanine aminotransferase 1, mitochondrial	135;309;366;451;463;486;514	92;98;160;180;307;310;331;332;337;338;348;368;425;437;445;469;478;487;491					343;373;458;538
304223194122314	30398868560791	306000995635986	306106090545654	iron ion homeostasis [GO:0055072];iron ion transport [GO:0006826]	apoplast [GO:0048046];cell wall [GO:0005618];plasma membrane [GO:0005886];plasmodesma [GO:0009506];secretory vesicle [GO:0099503]	copper ion binding [GO:0005507];ferroxidase activity [GO:0004322]	20	0	222.07	272	24.9	35.8	31.4	29.7	23.1	24.9	29.2	30.4	F4I7X1	F4I7X1	624	SKS6	SKU5-similar 6	104	186;210;284;363;387;526		196;200;361
243551464080811	252960014343262	NaN	250854949951172	cell wall organization [GO:0071555]	extracellular region [GO:0005576];plant-type cell wall [GO:0009505]	carboxylic ester hydrolase activity [GO:0052689];pectin acetylesterase activity [GO:0052793]	5	0	5.8026	14	5.4	8.6	0	8.3	5.6	4.1	5.6	5.6	F4I839	F4I839	625	PAE2	Pectin acetylesterase 2	177;343
272141017913818	273188972473145	242675666809082	275323734283447	reciprocal meiotic recombination [GO:0007131]	chloroplast [GO:0009507];microtubule associated complex [GO:0005875]		30	0	67.882	95	4.6	5.4	2.1	5.1	3.8	4.7	3.3	4.5	F4I8B9	F4I8B9	626	At1g65010	Putative WEB family protein At1g65010, chloroplastic	387	6;209;321;390;550;758;910
311524314880371	318519954681396	309691848754883	307940502166748		chloroplast [GO:0009507];chloroplast stroma [GO:0009570]	glyoxylate reductase (NADP) activity [GO:0030267];NAD binding [GO:0051287];NADP binding [GO:0050661];oxidoreductase activity, acting on the CH-OH group of donors, NAD or NADP as acceptor [GO:0016616]	31	0	323.31	396	79.6	65.9	65.4	72.3	73.2	72.9	72.3	65.4	F4I907	F4I907	628	GLYR2	Glyoxylate/succinic semialdehyde reductase 2, chloroplastic	90;102;123;141	99;101;111;175;190;191;206;211;221;223;290;300;331;334		144;231			219
261455383300781	265625705718994	264797115325928	26342622756958	regulation of transcription, DNA-templated [GO:0006355]	nucleus [GO:0005634]	transcription corepressor activity [GO:0003714]	7	0	6.5559	8	0.8	0.8	0.8	0.8	1.7	0.8	0.8	0.8	F4I962	F4I962	629	SNL3	SIN3-like 3	1276	605						1280
264187984466553	2677077293396	265597743988037	266920547485352				21	0	150.97	72	0.6	1.3	1.3	1.3	1.3	2.1	1.3	1.3	F4I983	F4I983	630	At1g24300	GYF domain-containing protein
278834362030029	277791900634766	277763690948486	278585166931152	mRNA processing [GO:0006397];mRNA transport [GO:0051028];nuclear-transcribed mRNA catabolic process, nonsense-mediated decay [GO:0000184];positive regulation of gene expression [GO:0010628];regulation of alternative mRNA splicing, via spliceosome [GO:0000381];regulation of translation [GO:0006417];RNA splicing [GO:0008380]	cytoplasm [GO:0005737];cytosol [GO:0005829];exon-exon junction complex [GO:0035145];nuclear body [GO:0016604];nuclear speck [GO:0016607];nucleolus [GO:0005730];nucleoplasm [GO:0005654];nucleus [GO:0005634]	mRNA binding [GO:0003729]	6	0	34.505	86	23.8	28.7	28.2	28.7	23.3	23.8	23.8	23.8	F4I9J7	F4I9J7	632	Y14	RNA-binding protein Y14		41;64;145;146		48
235270729064941	242259693145752	NaN	NaN		chloroplast [GO:0009507]	ATP binding [GO:0005524];RNA binding [GO:0003723];RNA helicase activity [GO:0003724]	3	0.0025778	2.0958	3	0.7	0.7	0	0	0	0.7	0	0	F4I9Q5	F4I9Q5	633	At1g58060	DExH-box ATP-dependent RNA helicase DExH7, chloroplastic
NaN	NaN	249105415344238	250332183837891	phosphatidylinositol dephosphorylation [GO:0046856]		hydrolase activity [GO:0016787]	3	0.0020325	2.1656	7	1.7	0	1.7	1.7	3.2	2.9	2.9	1.5	F4IA20	F4IA20	636	At1g71710	DNAse I-like superfamily protein
253178958892822	2522265625	253340511322021	243302612304688	adenine salvage [GO:0006168];GMP salvage [GO:0032263];guanine metabolic process [GO:0046098];guanine salvage [GO:0006178];hypoxanthine metabolic process [GO:0046100];IMP salvage [GO:0032264];purine ribonucleoside salvage [GO:0006166];seed germination [GO:0009845]	cytosol [GO:0005829]	guanine phosphoribosyltransferase activity [GO:0052657];hypoxanthine phosphoribosyltransferase activity [GO:0004422];magnesium ion binding [GO:0000287];nucleotide binding [GO:0000166]	3	0	11.851	18	19.2	19.2	13.1	19.2	19.2	13.1	19.2	5.6	F4IA25	F4IA25	637	HGPT	Hypoxanthine phosphoribosyltransferase
249066486358643	257316398620605	245293388366699	252721309661865	methylation [GO:0032259]		methyltransferase activity [GO:0008168]	6	0	50.453	10	17.2	9.6	11.6	5.6	17.2	17.2	17.2	9.9	F4IA48	F4IA48	638	At1g78150	N-lysine methyltransferase		149;158
245768661499023	240784683227539	NaN	247394390106201	starch biosynthetic process [GO:0019252]	chloroplast [GO:0009507]	glycogen (starch) synthase activity [GO:0004373];starch binding [GO:2001070];starch synthase activity [GO:0009011]	4	0	4.4516	7	2.1	2.1	0.9	2.9	0.9	0	1.7	0.9	F4IAG1	F4IAG1	641	SS3	Starch synthase 3		315;884
291539535522461	290628337860107	288122844696045	289711456298828	amine metabolic process [GO:0009308]	nucleus [GO:0005634]	copper ion binding [GO:0005507];primary amine oxidase activity [GO:0008131];quinone binding [GO:0048038]	21	0	89.202	160	28.1	22.7	27.9	24.7	26.9	26.6	24.4	25.4	F4IAX0	F4IAX0	644	At1g31690	Amine oxidase		497;538;539
292742214202881	294865608215332	294930095672607	295541515350342		integral component of membrane [GO:0016021];nucleus [GO:0005634]	ATP binding [GO:0005524];protein kinase activity [GO:0004672]	16	0	53.876	115	17.1	11.8	17.1	17.1	15.6	15.8	17.1	16.4	F4IB63	F4IB63	646	At1g51805	Leucine-rich repeat protein kinase family protein	153;318;323;383	174;190;314					454
273646945953369	276051959991455	277605934143066	273619365692139		chloroplast [GO:0009507];cytoplasm [GO:0005737]	intramolecular transferase activity, phosphotransferases [GO:0016868]	16	0	32.761	121	16.6	13.4	19.5	24.2	33.8	31.5	24.2	30.9	F4IBB2	F4IBB2	650	At1g58280	Phosphoglycerate mutase-like protein 2	57;175;303	58;217;255
269847888946533	269247894287109	26984354019165	26705696105957	oxidation-reduction process [GO:0055114]	nucleus [GO:0005634]		8	0	5.7288	25	7.7	7.7	9.7	9.7	9.7	9.7	12	12	F4IBH8	F4IBH8	651	At1g65560	Zinc-binding dehydrogenase family protein	55	223					59
319439487457275	316889171600342	320358390808105	320110855102539			gamma-glutamyl-peptidase activity [GO:0034722]	25	0	323.31	471	64.9	52	64.9	64.9	59.2	58.3	64.9	64.6	F4IBT7	F4IBT7	652	GGH2	Folate gamma-glutamyl hydrolase	43;212;243	133;134;138;174;207;259;280;313		247;296			215
304359912872314	304095287322998	303237781524658	302751979827881	carbohydrate metabolic process [GO:0005975];pentose-phosphate shunt, non-oxidative branch [GO:0009052]	chloroplast [GO:0009507];chloroplast envelope [GO:0009941];chloroplast stroma [GO:0009570];extracellular region [GO:0005576]	sedoheptulose-7-phosphate:D-glyceraldehyde-3-phosphate glyceronetransferase activity [GO:0004801];zinc ion binding [GO:0008270]	22	0	240.92	257	36.1	33	35.6	36.1	34.9	34.4	35.8	37.2	F4IC59	F4IC59	653	At1g12230	Aldolase superfamily protein	10;151;163	167;178;223;291;302;316;348;358;364		197			144
244459438323975	NaN	24252197265625	NaN	microtubule-based movement [GO:0007018];regulation of microtubule-based process [GO:0032886];root development [GO:0048364]	microtubule [GO:0005874];preprophase band [GO:0009574]	ATP binding [GO:0005524];microtubule binding [GO:0008017];microtubule motor activity [GO:0003777]	5	0	8.442	10	1	0	1	0	1	1	2.7	1	F4IC87	F4IC87	654	ARK3	Kinesin-like protein		499;502
276454010009766	285397129058838	277365379333496	280951175689697		endosome [GO:0005768];Golgi apparatus [GO:0005794];integral component of membrane [GO:0016021];membrane [GO:0016020];plasma membrane [GO:0005886];trans-Golgi network [GO:0005802];vacuole [GO:0005773]		9	0	24.981	103	11.1	11.6	8.3	10.4	11.1	12.6	11.1	11.6	F4ICJ5	F4ICJ5	655	At1g25570	Di-glucose binding protein with Leucine-rich repeat domain-containing protein		74;245
183874702453613	180848808288574	186045455932617	1958935546875	defense response to fungus [GO:0050832];photomorphogenesis [GO:0009640]	chloroplast thylakoid membrane [GO:0009535];endoplasmic reticulum lumen [GO:0005788];nuclear envelope [GO:0005635];peroxisome [GO:0005777];secretory vesicle [GO:0099503];vacuole [GO:0005773]	calcium ion binding [GO:0005509]	21	0	118.8	56	5.7	5.7	6.9	7.1	5.7	3.6	5.7	5.7	F4ICX9	F4ICX9	656	TSA1	TSK-associating protein 1		132;144;179;257;687;691;708
264340591430664	264511737823486	268958511352539	277183609008789			transferase activity, transferring acyl groups other than amino-acyl groups [GO:0016747]	4	0	24.133	7	1.5	1.5	6.6	6.6	5.1	0	5.1	5.1	F4IDH0	F4IDH0	658	YUP8H12R.39	HXXXD-type acyl-transferase family protein
25198579788208	246034851074219	256710929870605	241393051147461		nucleus [GO:0005634]	chromatin binding [GO:0003682]	13	0	21.155	39	4.5	4.9	4.1	2.8	2.3	2.8	2.3	2.7	F4IDJ0	F4IDJ0	659	YUP8H12R.24	Binding protein		410;452;651
237823677062988	237726364135742	237490901947021	238696670532227	ubiquinone biosynthetic process [GO:0006744]	mitochondrial inner membrane [GO:0005743];mitochondrion [GO:0005739];nucleus [GO:0005634]	lipid binding [GO:0008289]	4	0	4.4961	18	10.6	2.9	2.9	10.6	2.9	0	0	0	F4IE14	F4IE14	663	At1g19140	Ubiquinone biosynthesis protein
250983238220215	237410850524902	250147819519043	NaN	heat acclimation [GO:0010286];multicellular organism development [GO:0007275];nucleosome assembly [GO:0006334];nucleosome positioning [GO:0016584];positive regulation of cellular response to heat [GO:1900036];regulation of gene expression, epigenetic [GO:0040029];regulation of transcription, DNA-templated [GO:0006355];response to heat [GO:0009408]	cytosol [GO:0005829];nucleus [GO:0005634]	chromatin DNA binding [GO:0031490];histone binding [GO:0042393];metal ion binding [GO:0046872];promoter-specific chromatin binding [GO:1990841]	6	0.0059203	1.7121	7	1.3	1.3	4.3	0	0	1.3	1.3	4.3	F4IF36	F4IF36	666	FGT1	Protein FORGETTER 1
222187461853027	228587436676025	22286922454834	237504196166992	biosynthetic process [GO:0009058];regulation of L-ascorbic acid biosynthetic process [GO:2000082]		nucleotidyltransferase activity [GO:0016779]	18	0	56.238	76	11.6	13.5	10.6	19	13.3	13.5	15.3	14.3	F4IFA4	F4IFA4	667	At2g04650	ADP-glucose pyrophosphorylase family protein	48;260;327	17;236;237;285;305					11
291069183349609	296066265106201	289895877838135	291819152832031				7	0	46.751	63	38.9	38.4	38.9	47.3	38.9	41.4	38.9	47.3	F4IFA9	F4IFA9	668	At2g04690	Pyridoxamine 5'-phosphate oxidase family protein	120;129	202
27815372467041	284180011749268	277002830505371	280261211395264	embryo development ending in seed dormancy [GO:0009793];threonyl-tRNA aminoacylation [GO:0006435];tRNA aminoacylation for protein translation [GO:0006418]	chloroplast [GO:0009507];chloroplast stroma [GO:0009570];mitochondrion [GO:0005739]	aminoacyl-tRNA ligase activity [GO:0004812];ATP binding [GO:0005524];metal ion binding [GO:0046872];threonine-tRNA ligase activity [GO:0004829]	18	0	35.493	81	22.2	14.2	25.7	24.3	23.1	21.5	21.8	25.2	F4IFC5	F4IFC5	669	EMB2761	Threonine--tRNA ligase, chloroplastic/mitochondrial 2	568;585
256632137298584	255846862792969	258877639770508	262336311340332		nucleus [GO:0005634]	transaminase activity [GO:0008483]	5	0	9.7231	23	5.8	4.6	2.5	5.2	7.3	7.3	7.3	9	F4IFD0	F4IFD0	670	At2g04865	Protein MAIN-LIKE 2	469
261330642700195	261948471069336	265927772521973	270067806243896		cytoplasm [GO:0005737]	aminopeptidase activity [GO:0004177]	29	0	34.355	28	53.5	53.2	58.1	39.5	45.9	45.3	56.5	51.4	F4IFH2	F4IFH2	672	PIP	Proline iminopeptidase	90;280;281	12;192;211;233;249;264;269		243			1
241127510070801	236298980712891	237374801635742	238060703277588	endocytic recycling [GO:0032456];endocytosis [GO:0006897];endoplasmic reticulum organization [GO:0007029];endoplasmic reticulum-plasma membrane tethering [GO:0061817];plasma membrane repair [GO:0001778];protein targeting to membrane [GO:0006612];response to cold [GO:0009409];response to mechanical stimulus [GO:0009612];transport of virus in host, cell to cell [GO:0046740]	cortical endoplasmic reticulum [GO:0032541];cytoplasmic side of plasma membrane [GO:0009898];endoplasmic reticulum [GO:0005783];endoplasmic reticulum-plasma membrane contact site [GO:0140268];endosome [GO:0005768];plasma membrane [GO:0005886];plasmodesma [GO:0009506];vacuole [GO:0005773]	phosphatidylinositol phosphate binding [GO:1901981]	4	0	3.2295	9	1.2	1.2	1.2	1.2	1.2	1.2	1.2	1.2	F4IFM6	F4IFM6	673	SYTA	Synaptotagmin A
299029693603516	298127899169922	29891077041626	298129577636719		extracellular region [GO:0005576]	serine-type endopeptidase activity [GO:0004252]	40	0	227.41	294	34.5	33.4	28.5	29.7	38.2	38.3	40.3	37.7	F4IG09	F4IG09	674	SBT4.1	Subtilisin-like protease SBT4.1	237;251;554;624;644	178;179;181;183;188;208;211;230;235;258;296;424;458;464;646;673;732;769;772					660
200553665161133	199553203582764	204803009033203	203118553161621				77	0	323.31	381	0.3	0.3	0.3	0.3	0.3	0.6	2.2	2	F4IG73	F4IG73	675	BCHC2	BEACH domain-containing protein C2	280;560;594;635;642;738;843;1272;1449;2791	8;613;814;1013;1036;1257;1868;1872;2208;2346;2481
NaN	NaN	279630069732666	284591636657715	mRNA transport [GO:0051028];nuclear pore distribution [GO:0031081];protein import into nucleus [GO:0006606];regulation of transcription, DNA-templated [GO:0006355];RNA export from nucleus [GO:0006405];transcription-dependent tethering of RNA polymerase II gene DNA at nuclear periphery [GO:0000972]	membrane [GO:0016020];nuclear pore outer ring [GO:0031080]	structural constituent of nuclear pore [GO:0017056]	16	0	16.196	31	1.5	1.5	2.4	0.5	0.5	0.5	1.5	0.5	F4IGA5	F4IGA5	676	NUP133	Nuclear pore complex protein NUP133
207411479949951	218249702453613	211759071350098	206855144500732		ribosome [GO:0005840]		19	0	200.18	61	12.1	19.6	12.1	18.7	12.1	12.1	12.1	12.1	F4IHJ8	F4IHJ8	679	At2g21580	40S ribosomal protein S25		5;7;14;17;33;35;49;56;58;86		72			39;84;91
NaN	237210884094238	233081359863281	238857650756836	ATP-dependent chromatin remodeling [GO:0043044];defense response [GO:0006952];ethylene-activated signaling pathway [GO:0009873];flower development [GO:0009908];organ boundary specification between lateral organs and the meristem [GO:0010199];positive regulation of transcription by RNA polymerase II [GO:0045944];regulation of defense response to fungus [GO:1900150];regulation of ethylene-activated…	cytosol [GO:0005829];nucleus [GO:0005634]	ATP binding [GO:0005524];ATPase activity [GO:0016887];DNA binding [GO:0003677];DNA-dependent ATPase activity [GO:0008094];helicase activity [GO:0004386];histone binding [GO:0042393]	13	0	23.756	31	0	0.4	0.3	0.4	0.3	0	0	0	F4IHS2	F4IHS2	680	SYD	Chromatin structure-remodeling complex protein SYD
258859977722168	244550685882568	257376613616943	252865505218506	rRNA processing [GO:0006364]	nucleolus [GO:0005730]		8	0	5.5013	26	2.1	2	2.1	2.1	2.1	1.1	1.1	1.1	F4IHU8	F4IHU8	681	At2g34357	ARM repeat superfamily protein
28711353302002	288690605163574	286540012359619	286106262207031			ATP binding [GO:0005524];protein kinase activity [GO:0004672]	41	0	209.26	297	16.2	20.3	23.7	17.2	25.1	22.4	21.8	26.2	F4II29	F4II29	682	CTEXP	Kinase family with ARM repeat domain-containing protein	148;156	6;42;242;254;276;301;306;312;372;426;434;446;450		280
247247886657715	245935459136963	246382102966309	252754020690918			UDP-glycosyltransferase activity [GO:0008194]	38	0	29.378	54	20.6	27.3	23.1	28.7	15.8	12.1	12.1	11.9	F4IIG3	F4IIG3	685	UGT73B5	Glycosyltransferase	278	38;49;59;114;269;270;280;407;422;423;434;454;463;470;485;494		481;491			133
28611047744751	NaN	286732711791992	18377592086792	anisotropic cell growth [GO:0051211];anther dehiscence [GO:0009901];cellulose biosynthetic process [GO:0030244];cellulose microfibril organization [GO:0010215];cortical microtubule organization [GO:0043622];gynoecium development [GO:0048467];plant-type primary cell wall biogenesis [GO:0009833];pollen tube development [GO:0048868];pollen wall assembly [GO:0010208];protein localization to cortical …	cellulose synthase complex [GO:0010330];cortical microtubule [GO:0055028];cytoplasm [GO:0005737];cytoplasmic side of plasma membrane [GO:0009898];cytosol [GO:0005829];Golgi apparatus [GO:0005794];microtubule minus-end [GO:0036449];plasma membrane [GO:0005886];plasmodesma [GO:0009506]	microtubule binding [GO:0008017]	73	0	323.31	363	0.6	0	0.6	0.7	0.6	0	0.4	0	F4IIM1	F4IIM1	686	CSI1	Protein CELLULOSE SYNTHASE INTERACTIVE 1	66;563;721;949;968;994;996;1848;1987	186;311;314;698;799;1002;1304;1772;1780
247702178955078	252070980072021	234561328887939	24658073425293	regulation of phosphoprotein phosphatase activity [GO:0043666]		protein phosphatase binding [GO:0019903];protein phosphatase regulator activity [GO:0019888]	14	0	55.077	41	2.8	2.8	1.3	2.8	4.1	1.3	1.3	1.3	F4IIN7	F4IIN7	687	At2g28360	SIT4 phosphatase-associated family protein	407	73;231
303820571899414	301797332763672	30310188293457	303346862792969	carbohydrate metabolic process [GO:0005975]		beta-galactosidase activity [GO:0004565];carbohydrate binding [GO:0030246]	43	0	323.31	354	34.3	33.6	37.5	37	35.3	36.8	35.7	33.3	F4IIQ3	F4IIQ3	688	BGAL8	Beta-galactosidase	371;406;670;674;685;689;819;832	38;40;65;87;98;101;147;156;162;327;487;684;687;691		652;667			291
263453483581543	271640377044678	267783126831055	26792407989502	cell cycle [GO:0007049];cell division [GO:0051301];lateral root morphogenesis [GO:0010102];response to auxin [GO:0009733]	cortical microtubule [GO:0055028];phragmoplast [GO:0009524];plasma membrane [GO:0005886];plasmodesma [GO:0009506];preprophase band [GO:0009574]		23	0	33.241	92	5.1	6.8	5.3	6.5	7.8	7.3	7.2	4.6	F4IIU4	F4IIU4	689	AIR9	187-kDa microtubule-associated protein AIR9	620;961;1343
32481258392334	319744930267334	323374824523926	322536087036133			serine-type carboxypeptidase activity [GO:0004185]	21	0	323.31	462	51.1	42	51.1	51.1	43.6	43.6	43.6	43.6	F4IKK4	F4IKK4	691	SNG1	Sinapoylglucose 1	127;141;151	19;24;32;40;124;143;150;200;203;286		128;130			1;112;123;287
247627868652344	25005687713623	247236423492432	253022899627686				6	0	6.709	5	21.5	20	21.5	21.5	21.5	21.5	21.5	21.5	F4IKL8	F4IKL8	692	At2g29310	NAD(P)-binding Rossmann-fold superfamily protein	173	177
311066818237305	307194709777832	310650310516357	310767364501953		cytosol [GO:0005829];peroxisome [GO:0005777]	oxidoreductase activity [GO:0016491]	18	0	323.31	194	57.3	56	48.5	57.3	57.3	52.8	57.3	52.8	F4IKM1	F4IKM1	693	At2g29340	Tropinone reductase homolog At2g29340	39;65;175	45;55;56;179;207;208		47
NaN	NaN	263374080657959	262975578308105	microtubule-based movement [GO:0007018]	kinesin complex [GO:0005871];microtubule [GO:0005874]	ATP binding [GO:0005524];ATPase activity [GO:0016887];microtubule binding [GO:0008017];microtubule motor activity [GO:0003777]	3	0.0066024	1.6434	2	0	0	1.6	2.6	1.6	1.6	2.7	1.6	F4IL57	F4IL57	694	KIN14I	Kinesin-like protein KIN-14I		87		90;391		86
235799198150635	NaN	236266708374023	NaN	protein maturation by iron-sulfur cluster transfer [GO:0097428]		iron-sulfur cluster binding [GO:0051536];structural molecule activity [GO:0005198]	2	0	8.4005	4	9.1	0	9.1	0	0	9.1	9.1	0	F4ILA9	F4ILA9	696	At2g16710	Iron-sulfur cluster biosynthesis family protein		20
249115028381348	246483402252197	248858108520508	250328826904297	mRNA processing [GO:0006397]	nucleus [GO:0005634]	RNA binding [GO:0003723]	13	0	83.393	63	4	8.2	2	5.5	5.7	5	7.7	5.3	F4ILE0	F4ILE0	697	At2g16940	Splicing factor, CC1-like protein		199;437		383
NaN	22353479385376	223532638549805	NaN	anther wall tapetum development [GO:0048658];cellular response to reactive oxygen species [GO:0034614];chloroplast disassembly [GO:1904821];protein ubiquitination [GO:0016567];root development [GO:0048364]	cytoplasm [GO:0005737]	ubiquitin protein ligase activity [GO:0061630]	14	0	52.761	37	0	1.3	1.3	0	1.3	0	1.3	5.1	F4ILG6	F4ILG6	698	PUB4	RING-type E3 ubiquitin transferase
284157466888428	288930473327637	285119400024414	288086376190186	microtubule-based movement [GO:0007018]		ATP binding [GO:0005524];microtubule binding [GO:0008017];microtubule motor activity [GO:0003777]	7	0	5.0343	41	2	1.9	2	2.6	1.4	2	1.3	2	F4ILV6	F4ILV6	699	At2g36200	P-loop containing nucleoside triphosphate hydrolases superfamily protein	891
265967617034912	266158256530762	266304817199707	265973300933838	biosynthetic process [GO:0009058]		transferase activity [GO:0016740]	9	0	18.388	83	18.6	18.3	15.5	8	15.2	18.6	23.8	10.6	F4IM97	F4IM97	700	At2g01220	Nucleotidylyl transferase superfamily protein	149	268
250236492156982	240774898529053	246072158813477	240472679138184	DNA replication initiation [GO:0006270]	MCM complex [GO:0042555];nucleus [GO:0005634]	ATP binding [GO:0005524];DNA helicase activity [GO:0003678];DNA replication origin binding [GO:0003688]	8	0	16.108	25	1.5	1.8	1.5	1.7	0	0	0	0	F4INF9	F4INF9	704	MCM5	DNA helicase	48;178
NaN	254049987792969	250042324066162	252187461853027			ribonuclease activity [GO:0004540];RNA binding [GO:0003723]	10	0	32.112	47	0	1	1	1	1.9	1.8	1	1.9	F4INI6	F4INI6	705	EMB2763	Ribonuclease II family protein
302002277374268	300497303009033	301653079986572	301317310333252	post-embryonic root development [GO:0048528]	cytoplasm [GO:0005737];cytosol [GO:0005829];nucleus [GO:0005634];plasma membrane [GO:0005886]	calcium ion binding [GO:0005509]	22	0	279.58	238	59.4	61.6	50	59.8	52.5	61.6	54	56.2	F4IP55	F4IP55	706	GRF9	General regulatory factor 9	195	53;72;76;139;153;199					224
251936264038086	251784324645996	NaN	251452655792236	endoplasmic reticulum to Golgi vesicle-mediated transport [GO:0006888];protein exit from endoplasmic reticulum [GO:0032527];protein maturation [GO:0051604];vesicle docking involved in exocytosis [GO:0006904]	cytoplasm [GO:0005737]		5	0	21.874	6	0.9	0.9	0	0.9	0.9	0.9	2	0.9	F4IP68	F4IP68	707	MAG2-interacting protein 3	Vesicle docking protein
NaN	219556045532227	226934280395508	223786449432373			RNA binding [GO:0003723]	8	0	10.657	46	0	1.6	1	2	0	1.6	2.5	2.8	F4IP94	F4IP94	708	ML2	MEI2-like 2				179
268490009307861	NaN	268134784698486	272598838806152	phosphatidylinositol biosynthetic process [GO:0006661];pollen development [GO:0009555];vacuole organization [GO:0007033]	mitochondrion [GO:0005739];PAS complex [GO:0070772];vacuolar membrane [GO:0005774]		18	0	91.864	116	0.9	0	2.6	2.6	0.9	2	2.6	2	F4IPA6	F4IPA6	709	At2g01690	ARM repeat superfamily protein		25;36;56
265860614776611	NaN	232526454925537	NaN	DNA repair [GO:0006281];regulation of transcription, DNA-templated [GO:0006355]	NuA4 histone acetyltransferase complex [GO:0035267];nucleus [GO:0005634];plasmodesma [GO:0009506];SAGA complex [GO:0000124];SAGA-type complex [GO:0070461]	ATP binding [GO:0005524];protein serine/threonine kinase activity [GO:0004674];transcription coregulator activity [GO:0003712]	20	0	27.563	54	0.3	0	0.3	0	0	0	0	0	F4IPJ1	F4IPJ1	710	At2g17930	Phosphatidylinositol 3-and 4-kinase family protein with FAT domain-containing protein
299092769622803	298116111755371	298005599975586	299616832733154	cristae formation [GO:0042407];cysteinyl-tRNA aminoacylation [GO:0006423];polar nucleus fusion [GO:0010197];regulation of programmed cell death [GO:0043067]	chloroplast [GO:0009507];chloroplast stroma [GO:0009570];cytoplasm [GO:0005737];cytosol [GO:0005829];mitochondrion [GO:0005739]	ATP binding [GO:0005524];cysteine-tRNA ligase activity [GO:0004817];metal ion binding [GO:0046872]	31	0	188.02	270	49.7	44.2	48	45.1	42.3	44.6	39.1	43.9	F4IPY2	F4IPY2	712	SYCO	Cysteine--tRNA ligase, chloroplastic/mitochondrial	91;156;168;388	136;142;216;237;238;250;331;501
279273929595947	276913909912109	280440082550049	280656356811523	hydrogen peroxide catabolic process [GO:0042744];response to oxidative stress [GO:0006979]	extracellular region [GO:0005576]	heme binding [GO:0020037];metal ion binding [GO:0046872];peroxidase activity [GO:0004601]	20	0	139.72	133	34.5	23.3	34.8	35.1	31.8	30.1	28	33.8	F4IQ05	F4IQ05	713	At2g37130	Peroxidase	8;41;46;87;93;173;200	10;44;109;198;235
272202033996582	271546039581299	279271659851074	279909133911133	miRNA loading onto RISC involved in gene silencing by miRNA [GO:0035280];protein import into nucleus [GO:0006606]	cytoplasm [GO:0005737];cytosol [GO:0005829];nuclear envelope [GO:0005635];nucleus [GO:0005634]	Ran GTPase binding [GO:0008536]	39	0	164.32	261	8.6	8.5	10.9	13	5.7	9.2	8.3	15.5	F4IRR2	F4IRR2	718	SAD2	Importin beta-like SAD2	51;76;535	23;379;452;504;937		1009			1;395
215646286010742	213983783721924	217529106140137	212697925567627	red or far-red light signaling pathway [GO:0010017]	endoplasmic reticulum [GO:0005783];Golgi apparatus [GO:0005794];plasma membrane [GO:0005886];vacuole [GO:0005773]	heme binding [GO:0020037]	9	0	13.385	28	4.5	4.5	8.5	4.5	0	4.9	0	3.7	F4IRX7	F4IRX7	719	SOUL-1	SOUL heme-binding family protein		50;164;179
262290344238281	265920639038086	266041355133057	26315393447876	regulation of transcription, DNA-templated [GO:0006355];response to salt stress [GO:0009651];sodium ion homeostasis [GO:0055078]	cytosol [GO:0005829];nucleus [GO:0005634]	calcium ion binding [GO:0005509];nuclear receptor transcription coactivator activity [GO:0030374]	15	0	10.856	31	2.3	2	1.7	4.1	2.6	1	1.9	1.6	F4IS91	F4IS91	720	RSA1	Protein SHORT ROOT IN SALT MEDIUM 1	485	486;733
246481761932373	248906440734863	236973152160645	251350040435791			ATP binding [GO:0005524];protein kinase activity [GO:0004672]	2	0.0088246	1.5239	3	1.5	1.5	1.5	1.5	1.5	1.5	1.5	1.5	F4ISN4	F4ISN4	721	At2g25750	Protein kinase family protein							127
270967769622803	26888090133667	273154449462891	27049783706665	methylation [GO:0032259]		methyltransferase activity [GO:0008168]	10	0	21.374	47	15.4	9.1	15.6	11.4	17.6	13.6	15.1	10.2	F4IST0	F4IST0	722	At2g32160	S-adenosyl-L-methionine-dependent methyltransferases superfamily protein	250	37;153;415
268462524414063	266285362243652	26884485244751	268871612548828	methylation [GO:0032259]		S-adenosylmethionine-dependent methyltransferase activity [GO:0008757]	9	0	33.734	33	7.9	5.6	9.8	11.2	8.1	8.4	8.4	11.4	F4IST2	F4IST2	723	At2g32170	S-adenosyl-L-methionine-dependent methyltransferases superfamily protein
301237373352051	302130355834961	302133827209473	302125720977783	defense response to fungus, incompatible interaction [GO:0009817];response to abscisic acid [GO:0009737];response to cadmium ion [GO:0046686]	endoplasmic reticulum [GO:0005783];membrane [GO:0016020];plasma membrane [GO:0005886]		119	0	323.31	759	43.1	32.9	38.1	36.6	32.7	27.5	31.8	30.5	F4ISU2	F4ISU2	724	At2g32240	Early endosome antigen	615	16;53;59;74;94;96;129;135;145;146;150;163;198;199;208;269;333;352;390;427;474;493;553;565;593;621;630;640;655;656;713;715;770;779;789;810;828;837;856;873;875;905;960;973;984;1119;1127;1139;1145;1204;1245;1254;1264;1277
242766094207764	23804594039917	240990867614746	244511108398438			pyridoxal phosphate binding [GO:0030170];transaminase activity [GO:0008483]	11	0	15.858	27	4.7	2.4	3.2	3.2	4.7	4.7	4.9	9.9	F4ISY3	F4ISY3	725	AGT3	Alanine:glyoxylate aminotransferase 3	111;114	236
303459358215332	304901809692383	305589199066162	304893188476563		chloroplast [GO:0009507];chloroplast stroma [GO:0009570];cytosol [GO:0005829]		17	0	289.55	228	48.8	52.2	34.3	46.4	41.2	56.1	41.2	47.1	F4IT21	F4IT21	726	At2g43945	Uncharacterized protein	247;260;273	213;214;232;277;281					270
235318374633789	235928611755371	NaN	NaN			ubiquitin-like modifier activating enzyme activity [GO:0008641]	6	0	4.333	6	2.4	2.4	0	0	2.4	4.8	4.8	2.4	F4ITQ5	F4ITQ5	728	AXL	AXR1-like protein	29;33
266590805053711	274904479980469	272248096466064	273544750213623			ATP binding [GO:0005524];metal ion binding [GO:0046872];phosphoprotein phosphatase activity [GO:0004721];protein kinase activity [GO:0004672]	2	0.0020336	2.1708	3	2.7	1.9	1.9	1.9	2.7	1.9	1.9	1.9	F4IUD7	F4IUD7	729	At2g20050	Protein phosphatase 2C and cyclic nucleotide-binding/kinase domain-containing protein
265111103057861	263502311706543	267215595245361	267528953552246				4	0	44.104	40	16.6	16.6	16.6	16.6	20.2	16.6	20.2	20.2	F4IUJ0	F4IUJ0	731	At2g26340	Uncharacterized protein		222
205984153747559	218717727661133	196037864685059	197760353088379	defense response to bacterium [GO:0042742];jasmonic acid mediated signaling pathway [GO:0009867];long-day photoperiodism [GO:0048571];nuclear-transcribed mRNA catabolic process, nonsense-mediated decay [GO:0000184];response to wounding [GO:0009611];salicylic acid mediated signaling pathway [GO:0009863]	cytoplasm [GO:0005737];exon-exon junction complex [GO:0035145];nucleolus [GO:0005730];perinuclear region of cytoplasm [GO:0048471];polysome [GO:0005844]	mRNA binding [GO:0003729]	22	0	45.534	66	2.1	3.3	1	2.1	2.1	1.7	1.8	1.1	F4IUX6	F4IUX6	732	UPF2	Regulator of nonsense transcripts UPF2	99	293;460;675
302550735473633	295549011230469	297517948150635	299245071411133				21	0	127.47	168	48	34	48	49.4	46.6	36.8	45.4	40	F4IV18	F4IV18	733	At2g44760	Dihydroorotate dehydrogenase (DUF3598)	190;227;306;408	183;215;231;247;483		325			333
238054809570313	233327903747559	NaN	NaN	chromatin organization [GO:0006325]	nucleus [GO:0005634];plasmodesma [GO:0009506]	ATP binding [GO:0005524];DNA binding [GO:0003677];helicase activity [GO:0004386]	3	0.0011265	2.42	8	0.7	0.7	0	0	0	0	1	0	F4IV99	F4IV99	734	CHR5	Protein CHROMATIN REMODELING 5
NaN	256104564666748	256427059173584	255098438262939	amyloplast organization [GO:0009660];cell division [GO:0051301];embryo development ending in seed dormancy [GO:0009793];embryonic axis specification [GO:0000578];endocytosis [GO:0006897];endosome organization [GO:0007032];late endosome to vacuole transport [GO:0045324];negative gravitropism [GO:0009959];phototropism [GO:0009638];protein targeting to vacuole [GO:0006623];receptor-mediated endocyto…	endoplasmic reticulum [GO:0005783];endosome membrane [GO:0010008];Golgi apparatus [GO:0005794];intracellular membrane-bounded organelle [GO:0043231];late endosome [GO:0005770];late endosome membrane [GO:0031902];peroxisome [GO:0005777];trans-Golgi network [GO:0005802];vacuolar membrane [GO:0005774];vacuole [GO:0005773]		12	0	18.097	58	0.5	0.7	0.9	0.7	0.5	0.5	0.5	0	F4IVL6	F4IVL6	735	GRV2	DnaJ homolog subfamily C GRV2	443
230840759277344	202182140350342	229832534790039	228218021392822		commitment complex [GO:0000243];nuclear speck [GO:0016607];U2AF [GO:0089701];U2-type prespliceosome [GO:0071004]	poly-pyrimidine tract binding [GO:0008187];pre-mRNA 3'-splice site binding [GO:0030628]	1	0	3.296	21	1.1	1.1	1.1	1.1	1.1	1.1	1.1	1.1	F4IVU7	F4IVU7	736	At2g33435	RNA-binding (RRM/RBD/RNP motifs) family protein	1292
297009925842285	29508373260498	302376308441162	293034973144531	pentose-phosphate shunt [GO:0006098];reductive pentose-phosphate cycle [GO:0019253];response to cadmium ion [GO:0046686]	chloroplast [GO:0009507];chloroplast stroma [GO:0009570];chloroplast thylakoid membrane [GO:0009535];cytosol [GO:0005829];plastid [GO:0009536]	metal ion binding [GO:0046872];transketolase activity [GO:0004802]	63	0	323.31	366	41.6	32.1	35.5	35.6	37.9	44.4	39.8	40.8	F4IW47	F4IW47	739	TKL-2	Transketolase-2, chloroplastic	110;145;235;245;440;663	98;100;123;127;166;174;209;311;316;321;333;347;370;390;396;397;406;419;474;582;587;600;704;706;721		297;332;335;388;435;442	440	440	113;463;465
243152046203613	25467435836792	243544750213623	240362415313721	tRNA processing [GO:0008033];tRNA splicing, via endonucleolytic cleavage and ligation [GO:0006388]		NAD+ ADP-ribosyltransferase activity [GO:0003950];tRNA 2'-phosphotransferase activity [GO:0000215]	7	0	26.85	20	8.3	3.5	8.3	4.8	8.3	12.8	12.8	8.3	F4IW51	F4IW51	740	emb1067	RNA 2'-phosphotransferase, Tpt1 / KptA family
246784191131592	244635734558105	252843971252441	254301071166992		Golgi apparatus [GO:0005794];integral component of membrane [GO:0016021]	O-acetyltransferase activity [GO:0016413]	4	0	5.6533	24	7	9.8	9.6	13.2	10.7	9.6	10.7	10.7	F4IWA8	F4IWA8	741	TBL41	Protein trichome birefringence-like 41
252461929321289	235945720672607	245123176574707	250023441314697	ubiquitin-dependent protein catabolic process [GO:0006511]		ATP binding [GO:0005524];ubiquitin-protein transferase activity [GO:0004842]	6	0	9.2548	12	7	6.5	13.9	7	7	13.9	7	6.5	F4IWU7	F4IWU7	742	UBC14	Ubiquitin-conjugating enzyme 14	90	12;20
333343124389648	332859573364258	332918663024902	333730850219727	tricarboxylic acid cycle [GO:0006099]	cytosol [GO:0005829];mitochondrion [GO:0005739];oxoglutarate dehydrogenase complex [GO:0045252]	cobalt ion binding [GO:0050897];oxoglutarate dehydrogenase (succinyl-transferring) activity [GO:0004591];thiamine pyrophosphate binding [GO:0030976];zinc ion binding [GO:0008270]	110	0	323.31	2173	63.7	65.6	65.5	64.3	63.5	60.7	62.6	62.8	F4IWV2	F4IWV2	743	At3g55410	2-oxoglutarate dehydrogenase, E1 component	200;216;449;475;495;535;808;851;897;920;926	61;137;215;222;276;353;375;379;513;516;519;530;531;549;562;568;580;594;599;603;613;619;620;803;835;843;849;852;869;879;900;910;911;981;1001;1009;1013		87;384;464;882			119;294;762;786;797;801;840
239121417999268	231921672821045	238756771087646	232194843292236	Golgi to vacuole transport [GO:0006896];intracellular protein transport [GO:0006886];lytic vacuole organization [GO:0080171];regulation of intracellular pH [GO:0051453]	AP-3 adaptor complex [GO:0030123]		12	0	14.616	43	2.1	2.1	2.1	2.1	0	2.1	2.9	2.1	F4IWW1	F4IWW1	744	PAT2	AP-3 complex subunit beta	314
272492523193359	269866333007813	27289119720459	270653781890869				32	0	60.29	109	2.6	1.9	1.9	2.6	3.4	2.5	3.4	2.6	F4IX23	F4IX23	745	At3g62010	Metal ion-binding protein	1244	110;133;764;991					128
22441442489624	NaN	226922149658203	NaN	proteasome assembly [GO:0043248]	plasmodesma [GO:0009506];vacuolar membrane [GO:0005774]		9	0	15.686	31	2.2	0	2.2	0	0	2.2	0	0	F4IXH9	F4IXH9	747	At3g15180	ARM repeat superfamily protein	421	203
221635837554932	223424530029297	218404960632324	235208530426025	defense response to bacterium [GO:0042742];endocytosis [GO:0006897];immune response [GO:0006955];innate immune response [GO:0045087];protein transport [GO:0015031];regulation of ARF protein signal transduction [GO:0032012];vesicle-mediated transport [GO:0016192];viral process [GO:0016032]	cytosol [GO:0005829];early endosome [GO:0005769];early endosome membrane [GO:0031901];trans-Golgi network [GO:0005802]	ARF guanyl-nucleotide exchange factor activity [GO:0005086]	122	0	323.31	685	3.1	2.5	2.6	4.7	7	9	5.6	6.2	F4IXW2	F4IXW2	748	BIG5	Brefeldin A-inhibited guanine nucleotide-exchange protein 5	129;204;449;465;525;690;1112;1253;1651;1692;1715;1716	16;22;28;38;60;70;118;121;191;312;320;321;351;360;454;463;497;538;564;577;580;596;605;667;677;684;771;795;803;812;972;1125;1192;1304;1429;1433;1456;1472;1517;1623;1656;1730;1734		451			1490;1671;1719
267331161499023	266308975219727	271075916290283	270749015808105				12	0	150.32	80	28.7	26.9	30.8	26.5	28.7	27.6	16.8	26.5	F4IY75	F4IY75	749	At3g56130	Biotin/lipoyl attachment domain-containing protein	100;219	120;162;167;172;220					117
293038463592529	294004173278809	294016571044922	29488956451416	histidyl-tRNA aminoacylation [GO:0006427];mitochondrial translation [GO:0032543]	cytoplasm [GO:0005737];cytosol [GO:0005829];mitochondrion [GO:0005739]	ATP binding [GO:0005524];histidine-tRNA ligase activity [GO:0004821]	73	0	323.31	540	30.1	28.9	31.5	31.7	39.5	38.7	35	33.6	F4IYF8	F4IYF8	750	At3g02760	Histidine--tRNA ligase, cytoplasmic	128;135;268;294;317;326;515;623	13;215;221;286;287;301;360;364;380;432;434;457;465;475;496;502;544;598;628;631;645;662;671;778;780;823;856;880		532
246347255706787	244994792938232	244283504486084	249969253540039		chloroplast [GO:0009507]	ATP binding [GO:0005524];D-alanine-D-alanine ligase activity [GO:0008716];metal ion binding [GO:0046872]	7	0	3.7216	12	1.3	2.6	1	1.3	3.1	3.1	4.2	4.2	F4IYI8	F4IYI8	751	At3g08840	D-alanine-D-alanine ligase family	84
280322303771973	281556186676025	277823810577393	286323890686035	protein import into nucleus [GO:0006606]	cytoplasm [GO:0005737];cytosol [GO:0005829];nucleus [GO:0005634]	nuclear import signal receptor activity [GO:0061608];nuclear localization sequence binding [GO:0008139];Ran GTPase binding [GO:0008536]	41	0	323.31	311	13.7	12.4	14.2	17.7	23.3	19.7	24.2	24.8	F4IYK3	F4IYK3	752	At3g08943	ARM repeat superfamily protein	227;231;537;690;717	64;70;75;118;200;224;233;468;557;711;780;783					217;325;370
276405830383301	241933250427246	NaN	NaN	protein import into nucleus [GO:0006606]	cytosol [GO:0005829];nuclear envelope [GO:0005635]	Ran GTPase binding [GO:0008536]	13	0	70.244	50	2	2.2	0	0	1.2	1.2	2	0	F4IYK6	F4IYK6	753	At3g08960	ARM repeat superfamily protein	980	951		561
265998859405518	267338905334473	268943481445313	271406326293945	7-methylguanosine mRNA capping [GO:0006370];DNA recombination [GO:0006310];DNA repair [GO:0006281]	host cell nucleus [GO:0042025];plasmodesma [GO:0009506]	ATP binding [GO:0005524];DNA ligase (ATP) activity [GO:0003910];GTP binding [GO:0005525];mRNA guanylyltransferase activity [GO:0004484];polynucleotide 5'-phosphatase activity [GO:0004651];protein tyrosine phosphatase activity [GO:0004725];protein tyrosine/serine/threonine phosphatase activity [GO:0008138]	6	0.0011253	2.4081	22	1.6	1.6	1.6	1.6	5.5	4.3	1.6	1.6	F4IYM6	F4IYM6	754	At3g09100	mRNA capping enzyme family protein
276943817138672	276826438903809	276937847137451	275252208709717				22	0	48.169	144	16.4	16.1	15.1	15.3	17.8	17.8	15.3	15.3	F4IYR7;Q9SRD0	F4IYR7	755	At3g15410	Leucine-rich repeat (LRR) family protein	75;142;279;438;479	133;308
NaN	249546909332275	NaN	248349437713623				5	0	7.9091	27	0	9.1	0	3	8.1	3	7.6	7.6	F4IZI7	F4IZI7	757	AtATG18a	Transducin/WD40 repeat-like superfamily protein	103
259277763366699	260329246520996	NaN	261086483001709	embryo sac development [GO:0009553];mRNA transport [GO:0051028];pollen development [GO:0009555];pollen germination [GO:0009846];pollen tube growth [GO:0009860];regulation of protein export from nucleus [GO:0046825];ribosomal large subunit export from nucleus [GO:0000055];ribosomal small subunit export from nucleus [GO:0000056]	cytoplasm [GO:0005737];nuclear membrane [GO:0031965];nuclear pore [GO:0005643];nucleus [GO:0005634];plasmodesma [GO:0009506]	nuclear export signal receptor activity [GO:0005049];Ran GTPase binding [GO:0008536]	23	0	19.224	30	2.5	2.5	2.9	3.1	6.7	5	6.4	5	F4IZR5	F4IZR5	758	XPO1B	Protein EXPORTIN 1B	155;158;532	450;668;750
205762557983398	201077632904053	200499286651611	201805896759033	double fertilization forming a zygote and endosperm [GO:0009567];mRNA splice site selection [GO:0006376]	cytosol [GO:0005829];U1 snRNP [GO:0005685]	mRNA binding [GO:0003729]	16	0	31.466	57	2	2	2	2	6.2	4.2	4.2	4.2	F4IZU3	F4IZU3	759	UNE6	LUC7 related protein	33;41;56;270;273	6;26;74;213;215
264325618743896	271735038757324	267220802307129	268227443695068		chloroplast [GO:0009507]		6	0	72.807	21	16.3	15.9	13.4	17.1	17.1	16.7	16.7	14.2	F4IZV9	F4IZV9	760	At3g09250	Nuclear transport factor 2 (NTF2) family protein		100;107
235299339294434	235156898498535	235447463989258	NaN	cell cycle [GO:0007049];cell division [GO:0051301];cytoplasmic mRNA processing body assembly [GO:0033962];deadenylation-dependent decapping of nuclear-transcribed mRNA [GO:0000290];mRNA processing [GO:0006397];stem cell population maintenance [GO:0019827]	endoplasmic reticulum [GO:0005783];nucleus [GO:0005634];P-body [GO:0000932]	RNA binding [GO:0003723]	5	0	4.1249	20	0.9	1.2	0.9	0	1.2	1.2	1.2	2.6	F4J077	F4J077	761	PAT1H1	Protein PAT1 homolog 1		759
213251495361328	222718753814697	236554546356201	219728469848633	autophagosome assembly [GO:0000045];pollen development [GO:0009555]	autophagosome membrane [GO:0000421];cytosol [GO:0005829];integral component of membrane [GO:0016021];plasma membrane [GO:0005886]		52	0	310.16	225	2.2	2	1.4	1.5	0	0.9	0.6	0.9	F4J0P2	F4J0P2	763	At3g50590	Transducin/WD40 repeat-like superfamily protein	84;89;97;450;487;556;1401;1445;1539;1559;1574;1577;1589;1592	104;132;356;412;794;1160;1473;1491;1528;1547					1
2987575340271	300408763885498	29959888458252	299448909759521	starch catabolic process [GO:0005983]	chloroplast [GO:0009507];chloroplast starch grain [GO:0009569];chloroplast stroma [GO:0009570];starch grain [GO:0043036]	carbohydrate phosphatase activity [GO:0019203];protein tyrosine/serine/threonine phosphatase activity [GO:0008138]	25	0	102.74	199	23	22.8	27.2	27.4	26.1	29.6	27.7	23	F4J117	F4J117	765	LSF1	Phosphoglucan phosphatase LSF1, chloroplastic	390;577;583	83;121;122;189;279;484;488;551;557					115
264031295776367	260926895141602	261458492279053	265927772521973	transcription, DNA-templated [GO:0006351]	cytosol [GO:0005829];nucleus [GO:0005634]	transcription corepressor activity [GO:0003714]	11	0	12.1	55	7.6	3.3	5.1	5.1	6.8	6.8	3.6	5.8	F4J153	F4J153	767	At3g03570	Signal transducer, putative (DUF3550/UPF0682)
309416770935059	309295234680176	316380653381348	323866386413574	cell division [GO:0051301];chloroplast fission [GO:0010020];regulation of division septum assembly [GO:0032955]	chloroplast inner membrane [GO:0009706]		27	0	323.31	356	59.8	63.9	59.8	58.1	56.6	60.4	58.8	54	F4J1U2	F4J1U2	768	At3g29185	Glutamate NMDA receptor subunit epsilon-1, putative (DUF3598)	203;206;364	72;89;138;156;266;309;310;320;395		83;85			57;169
299867153167725	300270977020264	309564304351807	310330848693848	carbohydrate metabolic process [GO:0005975];response to bacterium [GO:0009617]	anchored component of plasma membrane [GO:0046658];apoplast [GO:0048046];cell wall [GO:0005618];endoplasmic reticulum [GO:0005783];secretory vesicle [GO:0099503]	cellulase activity [GO:0008810];glucan endo-1,3-beta-D-glucosidase activity [GO:0042973]	20	0	323.31	259	68	71.3	57.2	73	73	73	73	63.3	F4J270	F4J270	769	BG3	Probable glucan endo-1,3-beta-glucosidase BG3		155;292		42;44;45;70;109;285;286;293			211
265820465087891	262756862640381	267002830505371	266825771331787	folic acid-containing compound biosynthetic process [GO:0009396];one-carbon metabolic process [GO:0006730];photorespiration [GO:0009853];seedling development [GO:0090351];tetrahydrofolylpolyglutamate biosynthetic process [GO:0046901]	cytoplasm [GO:0005737];cytosol [GO:0005829];mitochondrial inner membrane [GO:0005743];mitochondrial matrix [GO:0005759];mitochondrion [GO:0005739]	ATP binding [GO:0005524];metal ion binding [GO:0046872];tetrahydrofolylpolyglutamate synthase activity [GO:0004326]	6	0	8.9907	36	10.6	5.6	10.6	10.6	7	7.7	5.4	7.5	F4J2K2	F4J2K2	770	FPGS2	Folylpolyglutamate synthase
278681468963623	276796264648438	276617336273193	277356357574463	mature ribosome assembly [GO:0042256]	cytosol [GO:0005829];ribonucleoprotein complex [GO:1990904];ribosome [GO:0005840]	GTP binding [GO:0005525];GTPase activity [GO:0003924];ribosome binding [GO:0043022];translation elongation factor activity [GO:0003746]	26	0	87.747	167	14.1	11.3	15.6	10	16.3	12.2	14.1	16.2	F4J2T9	F4J2T9	771	At3g22980	Ribosomal protein S5/Elongation factor G/III/V family protein	13;439	366;556			13
233334712982178	227529735565186	229897632598877	229867992401123	nucleotide metabolic process [GO:0009117]		guanylate kinase activity [GO:0004385]	8	0	21.727	36	4.9	4.9	4.9	4.9	4.9	4.9	2.1	2.1	F4J3E9	F4J3E9	775	AGK2	Guanylate kinase	310	280
281937103271484	284228610992432	2814768409729	281693515777588	carbohydrate metabolic process [GO:0005975]	vacuolar membrane [GO:0005774]	lyase activity [GO:0016829];polygalacturonase activity [GO:0004650]	10	0	60.305	133	15.1	16.9	12.2	18	20.2	20.2	12.2	15.9	F4J3I0	F4J3I0	776	At3g57790	Pectin lyase-like superfamily protein	72;239;249;342			426
288163185119629	285446586608887	288010387420654	288114280700684	peptidyl-diphthamide biosynthetic process from peptidyl-histidine [GO:0017183]		diphthine-ammonia ligase activity [GO:0017178]	21	0	131.6	170	15.6	24.2	19.8	13.4	18.8	21.2	19.1	17.8	F4J3Q1	F4J3Q1	778	At3g04480	Endoribonuclease	129;311;312;378;587	163;188;190;518;590		284
265079402923584	262251415252686	263757553100586	266131591796875			serine-type carboxypeptidase activity [GO:0004185]	8	0	17.296	20	8.6	12.4	14.5	15.5	21.1	12.7	19.3	14.5	F4J3S3	F4J3S3	779	SCPL7	Serine carboxypeptidase-like 7	284	98;110
300895462036133	299348049163818	29839075088501	298432292938232	tryptophanyl-tRNA aminoacylation [GO:0006436]		ATP binding [GO:0005524];transferase activity [GO:0016740];tryptophan-tRNA ligase activity [GO:0004830]	23	0	65.668	128	34.6	28.1	28.6	38.3	31.1	26.9	34.1	29.1	F4J4T3	F4J4T3	783	At3g04600	Nucleotidylyl transferase superfamily protein		137;317;362
258123512268066	NaN	259917678833008	259946613311768	intracellular protein transport [GO:0006886]		Ran GTPase binding [GO:0008536]	12	0	15.052	30	0.8	0	0.8	0.8	2	1.4	1.9	2	F4J550	F4J550	784	At3g17340	ARM repeat superfamily protein
NaN	NaN	245798606872559	243615856170654			kinase activity [GO:0016301];polysaccharide binding [GO:0030247]	1	0	27.733	6	0	0	7.3	7.3	0	7.3	0	7.3	F4J551	F4J551	785	At3g17350	Wall-associated receptor kinase carboxy-terminal protein	142;150;157
259942951202393	251548748016357	252602615356445	250969181060791			metal ion binding [GO:0046872];RNA binding [GO:0003723]	5	0	5.5136	16	1.1	1.1	1.9	0.8	0	0.8	1.9	2.8	F4J5A7	F4J5A7	786	At3g23900	RNA recognition motif (RRM)-containing protein		602
239206161499023	259081840515137	264924659729004	251087684631348	regulation of phosphoprotein phosphatase activity [GO:0043666]		protein phosphatase binding [GO:0019903];protein phosphatase regulator activity [GO:0019888]	30	0	248.97	150	1.5	3.4	3.4	3	2.8	0	2.5	3	F4J5I0	F4J5I0	787	At3g45190	SIT4 phosphatase-associated family protein	38;218;407;495	73;412;418;435;452;464;742;753
257374019622803	260469970703125	257238521575928	259223194122314	clathrin coat assembly [GO:0048268];clathrin-dependent endocytosis [GO:0072583];intracellular protein transport [GO:0006886]	clathrin coat of coated pit [GO:0030132];clathrin coat of trans-Golgi network vesicle [GO:0030130];clathrin vesicle coat [GO:0030125];cytosol [GO:0005829];plasma membrane [GO:0005886]	clathrin heavy chain binding [GO:0032050];structural molecule activity [GO:0005198]	6	0	36.01	19	3.1	6.2	10.1	3.1	0	3.1	3.1	0	F4J5M9	F4J5M9	788	At3g51890	Clathrin light chain 3
241542949676514	249845504760742	243607158660889	246818542480469	DNA-dependent DNA replication [GO:0006261]		DNA binding [GO:0003677];DNA-directed DNA polymerase activity [GO:0003887];exonuclease activity [GO:0004527]	3	0	4.185	8	3.6	8.7	6.3	3.6	3.6	3.6	6.3	3.6	F4J5Q3	F4J5Q3	789	At3g52050	5'-3' exonuclease family protein
294093074798584	291924419403076	294213562011719	294289016723633	intracellular distribution of mitochondria [GO:0048312];positive regulation of mitochondrial fusion [GO:0010636]	cytosol [GO:0005829];plasma membrane [GO:0005886]	RNA binding [GO:0003723]	79	0	323.31	717	19.9	16.1	24.2	23.3	31	28.2	33.3	24.5	F4J5R9	F4J5R9	790	NOXY38	Clustered mitochondria protein homolog	245;305;419;617;656;689;700;773;822;865;995;1112	101;113;119;258;387;516;601;615;631;636;649;657;707;713;754;804;879;972;986;987;997;1006;1191;1192;1230;1237;1254;1267;1280;1286		95;96;462;612;741			131;408
284088001251221	279391574859619	285181465148926	285098285675049		cytosol [GO:0005829];mitochondrion [GO:0005739]	ATP binding [GO:0005524];transferase activity, transferring acyl groups [GO:0016746]	45	0	323.31	439	25.9	15.6	19.5	22.2	25.4	25.2	29.2	22.6	F4J5T2	F4J5T2	791	LTA3	Dihydrolipoamide acetyltransferase component of pyruvate dehydrogenase complex		225;257;267;352;387;396;401;406;447;505;525;534;543;590;595;605;610;658;671;677					266;585;678
289942359924316	291691608428955	287223739624023	289519653320313	formation of cytoplasmic translation initiation complex [GO:0001732]	cytosol [GO:0005829];eukaryotic 43S preinitiation complex [GO:0016282];eukaryotic 48S preinitiation complex [GO:0033290];eukaryotic translation initiation factor 3 complex [GO:0005852];plasma membrane [GO:0005886]	mRNA binding [GO:0003729];translation initiation factor activity [GO:0003743]	23	0	198.61	185	31.2	38.9	32.7	36.1	28.3	26.5	18.4	24.9	F4J6A1	F4J6A1	792	EIF3G1	Eukaryotic translation initiation factor 3 subunit G	166	8;11;41;47;54;56;83;147;276;300		38;302			98;257
295052719116211	296359386444092	295969581604004	29520414352417	chromatin silencing [GO:0006342];embryo development ending in seed dormancy [GO:0009793];leaf development [GO:0048366];regulation of flower development [GO:0009909];shoot apical meristem development [GO:1902182]	cytosol [GO:0005829]	DNA binding [GO:0003677]	35	0	76.659	285	39.4	36.9	38.2	35.1	34.3	33.4	36.6	29.7	F4J6A8	F4J6A8	793	At3g11450	DnaJ and Myb-like DNA-binding domain-containing protein	31;56;629	68;69;150;151;159;205;322;462;507;529;604;624;637		627	629		626
242289810180664	279961490631104	246946086883545	NaN	intracellular signal transduction [GO:0035556];peptidyl-serine phosphorylation [GO:0018105];protein autophosphorylation [GO:0046777];regulation of growth [GO:0040008]	cytosol [GO:0005829];plasma membrane [GO:0005886];root hair [GO:0035618]	ATP binding [GO:0005524];kinase activity [GO:0016301];metal ion binding [GO:0046872];protein serine/threonine kinase activity [GO:0004674]	15	0	21.801	40	1.9	1.1	2	0	2	0	2	1.1	F4J6F6	F4J6F6	794	IREH1	Probable serine/threonine protein kinase IREH1	605	531
243030586242676	233659973144531	245200138092041	251308097839355	ubiquinone biosynthetic process [GO:0006744]	extrinsic component of mitochondrial inner membrane [GO:0031314];mitochondrion [GO:0005739]	FAD binding [GO:0071949];oxidoreductase activity [GO:0016491];oxidoreductase activity, acting on paired donors, with incorporation or reduction of molecular oxygen, NAD(P)H as one donor, and incorporation of one atom of oxygen [GO:0016709];oxidoreductase activity, acting on paired donors, with incorporation or reduction of molecular oxygen, reduced flavin or flavoprotein as one donor, and incorpo…	9	0	34.26	31	5.5	2.6	5.5	7.3	5.1	2.6	2.6	5.5	F4J6I6	F4J6I6	795	COQ6	Ubiquinone biosynthesis monooxygenase COQ6, mitochondrial		224;245
262867965698242	272722206115723	268677349090576	26707935333252	protein import into nucleus [GO:0006606]	cytosol [GO:0005829];nuclear envelope [GO:0005635]	Ran GTPase binding [GO:0008536]	44	0	323.31	315	7.9	7.8	5.7	10.7	12.2	15	17.7	10.7	F4J738;REV__Q9M0M4	F4J738	796	At3g59020	Importin beta-like SAD2 homolog	111;444;531;757	64;69;86;375;428;433;446;454;758;930;936					391	757
27170259475708	272753314971924	275231285095215	272922840118408	actin cytoskeleton organization [GO:0030036];actin filament capping [GO:0051693];actin filament organization [GO:0007015];barbed-end actin filament capping [GO:0051016]	F-actin capping protein complex [GO:0008290];nucleus [GO:0005634]	actin filament binding [GO:0051015]	6	0	9.6136	44	7.1	2.9	9.9	7.1	7.1	18.1	18.1	14.4	F4J7C4	F4J7C4	797	CPA	Subunits of heterodimeric actin filament capping protein Capz superfamily	184
281016941070557	282413177490234	278763103485107	27844518661499	protein deubiquitination [GO:0016579];ubiquitin-dependent protein catabolic process [GO:0006511]		thiol-dependent ubiquitinyl hydrolase activity [GO:0036459]	99	0	253.81	310	33.6	26.7	38.3	38.2	36.2	39	36.3	37	F4J7I2	F4J7I2	798	UBP13	Ubiquitin-specific protease 13	288;529;763;772;851	69;181;261;265;290;294;328;362;431;526;534;581;592;600;608;613;629;659;775;821;835;843;857;862;922;936;955;958;986;1036;1037;1094;1108;1111					153;276;728
267763061523438	270571365356445	265559043884277	268818035125732	embryo development ending in seed dormancy [GO:0009793];mRNA methylation [GO:0080009];mRNA processing [GO:0006397];RNA splicing [GO:0008380]	nuclear speck [GO:0016607];nucleoplasm [GO:0005654]		10	0	51.353	24	0.4	0.4	0.4	0.4	0.4	0.4	0.4	0.4	F4J8G7	F4J8G7	801	VIR	Protein virilizer homolog		956
274452171325684	272914943695068	275311088562012	276080894470215			hydrolase activity [GO:0016787]	8	0	71.901	64	33.7	36.7	38.7	38.7	29.6	30.2	19.1	24.6	F4J8J7	F4J8J7	802	At3g11930	Adenine nucleotide alpha hydrolases-like superfamily protein	147	33;109
272089958190918	273023433685303	26583194732666	24503002166748	embryo sac development [GO:0009553];mRNA processing [GO:0006397];rRNA processing [GO:0006364]	nucleolus [GO:0005730];plasma membrane [GO:0005886];small-subunit processome [GO:0032040]	RNA binding [GO:0003723]	21	0	52.757	63	1.4	1.4	2.3	1.8	1.4	1.4	1.4	1.4	F4J8K6	F4J8K6	803	RRP5	rRNA biogenesis protein RRP5
278828525543213	NaN	274846210479736	272685661315918	intracellular signal transduction [GO:0035556];protein phosphorylation [GO:0006468];regulation of gene expression [GO:0010468];regulation of mRNA processing [GO:0050684];response to oxidative stress [GO:0006979];spliceosomal complex assembly [GO:0000245]	cytoplasm [GO:0005737];nucleus [GO:0005634]	ATP binding [GO:0005524];MAP kinase activity [GO:0004707];protein kinase activity [GO:0004672]	4	0	4.6183	21	1.7	0	1.7	3.8	1.7	3.8	1.7	3.8	F4J982	F4J982	806	SRPK4	Ser/arg-rich protein kinase 4
285529613494873	288885250091553	286273193359375	287617359161377	glutamine biosynthetic process [GO:0006542];lateral root formation [GO:0010311];polyamine catabolic process [GO:0006598];response to abscisic acid [GO:0009737];response to bacterium [GO:0009617];root cap development [GO:0048829]	cytosol [GO:0005829]	gamma-tubulin binding [GO:0043015];hydrolase activity [GO:0016787];protein self-association [GO:0043621];transcription factor binding [GO:0008134]	53	0	323.31	434	24.1	23.6	21.2	21.2	28.2	27.8	30.9	34.5	F4J9A0	F4J9A0	807	NodGS	Nodulin/glutamine synthase-like protein	89;516;648;722	7;78;88;109;249;268;328;406;410;634;725;822;828;832;840;846		202
242957916259766	246325073242188	260968780517578	258283252716064		cytosol [GO:0005829]		51	0	257.23	195	7.7	7.1	10.3	5.2	6.1	5.9	2.4	4.5	F4J9K9	F4J9K9	809	At3g05900	Neurofilament protein-like protein	431	15;20;131;211;232;234;287;353;387;447;448;477;506;535;550;559;570;576;585;591;649;650;660
272764854431152	271717872619629	271632690429688	271547985076904			metal ion binding [GO:0046872];oxidoreductase activity [GO:0016491]	12	0	24.859	52	30.6	23.7	33.1	33.1	41.4	34.2	49.6	39.6	F4J9Y8	F4J9Y8	811	At3g19000	2-oxoglutarate (2OG) and Fe(II)-dependent oxygenase superfamily protein	162;210
253172760009766	252532081604004	254204044342041	253358936309814			aspartic-type endopeptidase activity [GO:0004190]	2	0	5.9005	4	6.6	4.6	6.6	6.6	6.6	6.6	6.6	4.6	F4JA44	F4JA44	812	At3g25700	Eukaryotic aspartyl protease family protein	140;145
25704273223877	247707214355469	255786819458008	255794010162354	carbohydrate metabolic process [GO:0005975]		hydrolase activity, hydrolyzing O-glycosyl compounds [GO:0004553]	16	0	13.528	32	18.1	20.6	17.8	20.9	23	21.1	23	22.9	F4JAB3	F4JAB3	814	At3g47010	Glycosyl hydrolase family protein	165	392;398;572		399
273636093139648	273744297027588	267574806213379	255041255950928				8	0	16.5	24	7	6.8	7	9	7	3	7	5.4	F4JAE0	F4JAE0	815	At3g53390	Transducin/WD40 repeat-like superfamily protein	504	218;292
239350814819336	NaN	NaN	246104297637939	peptidyl-proline hydroxylation to 4-hydroxy-L-proline [GO:0018401];root hair cell development [GO:0080147]	endoplasmic reticulum [GO:0005783];endoplasmic reticulum membrane [GO:0005789];endosome [GO:0005768];Golgi apparatus [GO:0005794];Golgi cis cisterna [GO:0000137];Golgi membrane [GO:0000139];integral component of membrane [GO:0016021];trans-Golgi network [GO:0005802]	iron ion binding [GO:0005506];L-ascorbic acid binding [GO:0031418];procollagen-proline 4-dioxygenase activity [GO:0004656]	6	0	11.465	11	5.7	0	0	5.7	9.4	0	9.4	5.7	F4JAU3	F4JAU3	816	P4H2	Prolyl 4-hydroxylase 2	59	98
295573692321777	NaN	NaN	286735420227051	translational elongation [GO:0006414]	cytosol [GO:0005829];ribonucleoprotein complex [GO:1990904];ribosome [GO:0005840]	GTP binding [GO:0005525];GTPase activity [GO:0003924];ribosome binding [GO:0043022];translation elongation factor activity [GO:0003746]	45	0	28.492	18	39	37.6	37.3	35.5	38	39	40.5	37.9	F4JB05	F4JB05	817	MGH6.2	Ribosomal protein S5/Elongation factor G/III/V family protein	110;115;253;426	138;185;293;297;367;460;472;474;556;560;595;605;609;610;638;650;728		75;80;559;635;658		253	139;291;296;459;659;708;736
256752986907959	253659629821777	251919708251953	255055484771729	signal transduction [GO:0007165]	cytosol [GO:0005829];nucleus [GO:0005634];protein phosphatase type 2A complex [GO:0000159]	protein phosphatase regulator activity [GO:0019888]	9	0	6.4985	19	5.3	6.2	7.2	4.7	3.2	7.6	4.7	5.7	F4JBC4	F4JBC4	818	At3g26020	Serine/threonine protein phosphatase 2A regulatory subunit	362
294979076385498	297801284790039	296354370117188	295984668731689		chloroplast [GO:0009507]		12	0	134.06	179	47.4	47.1	47.4	47.4	47.4	41.6	47.4	38.8	F4JBU0	F4JBU0	820	At3g60440	Phosphoglycerate mutase family protein	100;199;246;248;276	30;213
244700450897217	245549087524414	NaN	251008129119873			3-hydroxyisobutyryl-CoA hydrolase activity [GO:0003860];peptidase activity [GO:0008233]	6	0	13.29	18	10.6	6.6	0	10.6	4	2.6	9.2	9.4	F4JBV0	F4JBV0	821	At3g60510	ATP-dependent caseinolytic (Clp) protease/crotonase family protein	211;352
NaN	246105422973633	NaN	254345035552979	DNA repair [GO:0006281];proteasomal ubiquitin-independent protein catabolic process [GO:0010499]	cytosol [GO:0005829];nucleus [GO:0005634];proteasome complex [GO:0000502]	lysine-acetylated histone binding [GO:0070577];peptidase activator activity [GO:0016504];proteasome binding [GO:0070628]	59	0	199.89	263	0	1.1	0.6	0.6	2.1	0.6	2	1.4	F4JC97	F4JC97	822	PA200	Proteasome activator subunit 4	828;1017;1306	656;753;757;812;1005;1167;1170;1189;1386;1388;1512;1599;1606;1688;1711;1767;1772		641			1074
275470142364502	264740428924561	275310344696045	263940467834473			ATP binding [GO:0005524];hydrolase activity [GO:0016787]	29	0	67.805	86	1.5	2.5	1.5	2.2	1.5	1.5	1.5	2.8	F4JCC9	F4JCC9	823	At3g19740	P-loop containing nucleoside triphosphate hydrolases superfamily protein	195	94;664;714;903;975		393
267620525360107	275902080535889	265181674957275	279097633361816	arabinogalactan protein metabolic process [GO:0010405];carbohydrate metabolic process [GO:0005975]	cell wall [GO:0005618]	hydrolase activity, hydrolyzing O-glycosyl compounds [GO:0004553];polysaccharide binding [GO:0030247];raffinose alpha-galactosidase activity [GO:0052692]	12	0	20.702	98	9.3	13.9	7.7	12.2	14.5	12.4	14.5	12.2	F4JCI4	F4JCI4	825	At3g26380	Alpha-galactosidase	340	132;288;478;480;591
244712238311768	224434928894043	246426219940186	222218456268311				18	0	43.523	64	0.9	0.7	0.9	0.7	1.6	0.9	0.7	0	F4JCM5	F4JCM5	826	At3g33530	Transducin family protein / WD-40 repeat family protein	308;599;986;1189;1198	1169
29193286895752	293208332061768	30298656463623	304473667144775	protein deubiquitination [GO:0016579]		thiol-dependent ubiquitinyl hydrolase activity [GO:0036459]	3	0.0033009	2.0412	3	1.4	1.4	0.6	0.6	0.6	0	0	0	F4JCR1	F4JCR1	827	At3g47890	Ubiquitin carboxyl-terminal hydrolase-related protein	561
242015743255615	247736415863037	NaN	240051326751709	protein deubiquitination [GO:0016579]		thiol-dependent ubiquitinyl hydrolase activity [GO:0036459]	5	0	5.2661	9	1.6	1.6	0	0.7	0	0.7	0.7	0.5	F4JCR2	F4JCR2	828	At3g47910	Ubiquitin carboxyl-terminal hydrolase-related protein	601
NaN	248332557678223	236542530059814	247912406921387	miRNA mediated inhibition of translation [GO:0035278]	nucleus [GO:0005634];P-body [GO:0000932]	chromatin binding [GO:0003682]	7	0	11.504	17	0	1	0.9	1	0	0	0	0	F4JCS8	F4JCS8	829	SUO	Protein SUO	1107
250482654571533	238058738708496	237747478485107	249705753326416	isopentenyl diphosphate biosynthetic process, mevalonate pathway [GO:0019287];sterol biosynthetic process [GO:0016126]	cytosol [GO:0005829];peroxisome [GO:0005777]	ATP binding [GO:0005524];diphosphomevalonate decarboxylase activity [GO:0004163]	23	0	38.264	52	21.5	15	24.6	20.5	19.3	13.1	22.7	27.9	F4JCU3	F4JCU3	830	MVD2	Diphosphomevalonate decarboxylase MVD2, peroxisomal	49	26;70;235;240;250;295		68			65;245
309041175842285	308095436096191	30020092010498	302143096923828			phosphatidylinositol binding [GO:0035091]	1	0.0023981	2.1376	7	1.3	1.3	1.3	1.3	1.3	1.3	0	1.3	F4JDV4	F4JDV4	832	At3g48195	Phox (PX) domain-containing protein
255280570983887	260464153289795	255195026397705	259174098968506		secretory vesicle [GO:0099503];vacuole [GO:0005773]		5	0	6.5578	26	7.7	15.5	14.4	14.4	15.5	15.5	8.9	8.9	F4JEG0	F4JEG0	835	At3g07460	Uncharacterized protein		49		54
289755535125732	288063659667969	288827362060547	288351802825928			hydrolase activity [GO:0016787]	16	0	196.04	158	64.5	45.2	63.1	56.3	45.9	55.9	64.2	58.8	F4JEJ3	F4JEJ3	836	At3g13800	Metallo-hydrolase/oxidoreductase superfamily protein	14;59;202	257
323689575195313	323269424438477	32446949005127	324618301391602			ATP binding [GO:0005524];helicase activity [GO:0004386];translation initiation factor activity [GO:0003743]	52	0	323.31	1226	68.3	70.3	78.4	73.5	63.9	69.3	62.4	63.1	F4JEL5	F4JEL5	837	EIF4A1	Eukaryotic translation initiation factor 4A1	69;136	56;70;120;132;168;178;194;227;231;238;248;285;292;370		310			44;122;166;179;188;217;293;307;384
244942989349365	245501003265381	240521697998047	241688270568848				10	0	39.892	51	11.6	7.3	3.8	7.3	7.3	7.3	14.3	7.3	F4JET6	F4JET6	838	JMJD5	2-oxoglutarate (2OG) and Fe(II)-dependent oxygenase superfamily protein		148
226370162963867	234365711212158	23678955078125	22922233581543	activation of GTPase activity [GO:0090630];intracellular protein transport [GO:0006886]	cytosol [GO:0005829]	GTPase activator activity [GO:0005096];Rab GTPase binding [GO:0017137]	18	0	48.433	52	3.2	2.7	1.7	2.6	1.5	0	0	1.7	F4JF82	F4JF82	840	At3g55020	Ypt/Rab-GAP domain of gyp1p superfamily protein		685
24184196472168	242653503417969	NaN	NaN			oxidoreductase activity [GO:0016491]	3	0.00094697	2.5849	2	9	5	0	0	5	9	9	9	F4JFB9	F4JFB9	842	SDRd	NAD(P)-binding Rossmann-fold superfamily protein
272658863067627	302593460083008	289597778320313	269201393127441	protein folding [GO:0006457]	cell wall [GO:0005618];chloroplast stroma [GO:0009570];cytosol [GO:0005829];mitochondrion [GO:0005739]	ATP binding [GO:0005524];unfolded protein binding [GO:0051082]	76	0	323.31	437	14.9	18.5	17.8	12.9	24.7	24.7	22.4	21.2	F4JFN3	F4JFN3	845	HSP90-6	Heat shock protein 90-6, mitochondrial	183;515;636;661	148;161;234;237;240;276;280;313;325;364;377;420;422;450;483;509;512;523;551;576;605;612;620;624;629;630;640;646;679;693;708		128;163			674;724
262822952270508	NaN	264351711273193	262945652008057	regulation of RNA metabolic process [GO:0051252]	nucleus [GO:0005634];ribonucleoprotein complex [GO:1990904]	mRNA binding [GO:0003729];RNA binding [GO:0003723]	7	0	20.697	17	1.6	0	1.6	1.6	1.6	1.6	4.6	1.6	F4JFN7	F4JFN7	846	At3g07810	RNA-binding (RRM/RBD/RNP motifs) family protein				93
258347282409668	259994869232178	259837226867676	259287261962891	xylan catabolic process [GO:0045493]		endo-1,4-beta-xylanase activity [GO:0031176]	5	0	3.2637	27	1.2	1.2	1.2	1.2	1.2	1.2	1.2	1.2	F4JG10	F4JG10	849	XYN3	Endo-1,4-beta-xylanase 3		73
256016731262207	256790637969971	252727012634277	252689228057861		integral component of membrane [GO:0016021]	ATP binding [GO:0005524];protein kinase activity [GO:0004672]	4	0	9.1341	16	8.4	7	4.4	8.4	4.4	1.6	4.4	4.4	F4JGE0	F4JGE0	851	CRK40	Cysteine-rich RLK (RECEPTOR-like protein kinase) 40	81;90;93;105;122
275986099243164	277318210601807	275940589904785	275270118713379	embryo development ending in seed dormancy [GO:0009793];fructose 6-phosphate metabolic process [GO:0006002];photosynthesis [GO:0015979];response to glucose [GO:0009749]	cytosol [GO:0005829]	6-phosphofructokinase activity [GO:0003872];ATP binding [GO:0005524];diphosphate-fructose-6-phosphate 1-phosphotransferase activity [GO:0047334];metal ion binding [GO:0046872];phosphofructokinase activity [GO:0008443]	30	0	46.116	92	15.6	20.6	20.6	25.1	28.1	27.2	33.9	35.9	F4JGR5	F4JGR5	853	PFP-BETA2	Pyrophosphate--fructose 6-phosphate 1-phosphotransferase subunit beta 2	168;208;226;249	268;410;508;514;515;526;527		160			166;255;260;411;415;517
NaN	240916004180908	228450222015381	212135925292969		cytosol [GO:0005829]		33	0	46.216	126	0	1.9	1.2	1.1	1.1	0	0	0	F4JH69	F4JH69	854	UNH	Vps51/Vps67 family (Components of vesicular transport) protein	195;226	11;171;181;197;263					8
257414455413818	257762050628662	258497409820557	258145294189453	acyl-CoA metabolic process [GO:0006637];fatty acid catabolic process [GO:0009062]		acyl-CoA hydrolase activity [GO:0047617]	6	0	11.131	53	15.5	6.6	12.5	10.2	13.2	13.2	12.5	12.5	F4JHC9	F4JHC9	855	At4g00520	Acyl-CoA thioesterase family protein
251201667785645	250677604675293	25090633392334	249992065429688				4	0	4.121	18	4.8	4.8	4.8	4.8	7.9	7.9	4.8	7.9	F4JHD7	F4JHD7	856	At4g00560	NAD(P)-binding Rossmann-fold superfamily protein
285660171508789	254790496826172	NaN	254037971496582	acceptance of pollen [GO:0060321];exocytosis [GO:0006887];Golgi to plasma membrane transport [GO:0006893];pollen germination [GO:0009846];pollen tube growth [GO:0009860];vesicle docking involved in exocytosis [GO:0006904]	cell wall [GO:0005618];cytoskeleton [GO:0005856];cytosol [GO:0005829];exocyst [GO:0000145];extracellular exosome [GO:0070062];membrane [GO:0016020];phragmoplast [GO:0009524];plasma membrane [GO:0005886];plasmodesma [GO:0009506]		27	0	79.407	94	2.2	0.9	0	2.2	0	0	2.2	0	F4JHH5	F4JHH5	857	SEC15B	Exocyst complex component SEC15B	35;364;549;663	9;442;750
313406944274902	312961959838867	313899745941162	313375606536865				28	0	323.31	509	55.4	55.4	55.4	49.6	55.4	54.6	54.6	48.8	F4JHJ0	F4JHJ0	859	At4g02450	HSP20-like chaperones superfamily protein	77	8;26;29;43;54;60;67;81;89;94;95;101;213;218;226;237;240		48
NaN	212512435913086	NaN	251633853912354	intracellular protein transport [GO:0006886];pollen development [GO:0009555];vesicle-mediated transport [GO:0016192]			9	0	12.428	27	0	0.7	0	1.5	0	0	0	0	F4JHM9	F4JHM9	860	SETH5	Transducin family protein / WD-40 repeat family protein		1398
279048347473145	277543621063232	277224712371826	279420127868652	biosynthetic process [GO:0009058]	cytosol [GO:0005829]	catalytic activity [GO:0003824]	12	0	48.673	103	8.9	15	13.1	16	23	20.1	16	16	F4JHW1	F4JHW1	861	At4g02860	Phenazine biosynthesis PhzC/PhzF protein		27;202;292;294;302
302358055114746	30257884979248	303401107788086	30394172668457		chloroplast [GO:0009507]	catalytic activity [GO:0003824]	40	0	287.22	360	38.9	33.5	35.3	40.7	42.5	44.9	40.5	41.8	F4JI63	F4JI63	864	At4g03200	Catalytics	266;347;499;797;802	232;243;253;268;304;308;469;657;686;791		573
256759452819824	252642402648926	260434551239014	254415168762207	DNA catabolic process [GO:0006308];RNA phosphodiester bond hydrolysis, endonucleolytic [GO:0090502]		endonuclease activity [GO:0004519];endoribonuclease activity [GO:0004521];metal ion binding [GO:0046872];nucleic acid binding [GO:0003676];single-stranded DNA endodeoxyribonuclease activity [GO:0000014]	5	0	4.6509	19	15.1	20.1	20.1	15.4	17.7	7	20.1	17.7	F4JJL0	F4JJL0	869	ENDO4	Endonuclease 4	93;98
261936073303223	264389991760254	26242036819458	245984954833984	DNA catabolic process [GO:0006308];RNA phosphodiester bond hydrolysis, endonucleolytic [GO:0090502]		endonuclease activity [GO:0004519];endoribonuclease activity [GO:0004521];metal ion binding [GO:0046872];nucleic acid binding [GO:0003676];single-stranded DNA endodeoxyribonuclease activity [GO:0000014];T/G mismatch-specific endonuclease activity [GO:0043765]	12	0	52.349	49	11.1	11.1	11.1	6.4	8.8	8.8	11.1	8.8	F4JJL3	F4JJL3	870	ENDO5	Endonuclease 5	30;62;90;95;230;243	31;47;270
242400894165039	243133373260498	236073837280273	239784965515137				4	0	7.1951	15	19.4	19.4	19.4	19.4	30.6	22.4	22.4	30.6	F4JJL6	F4JJL6	871	At4g21620	Glycine-rich protein	49;86;90	75
268982753753662	273123321533203	273772449493408	274709606170654	intracellular protein transport [GO:0006886]			17	0	133.83	94	20.7	29.1	24.4	25.1	24	26.5	17.1	19.6	F4JJR0	F4JJR0	873	VPS26B	Vacuolar protein sorting 26B	25	260
300186328887939	296588592529297	298650531768799	296822929382324	tRNA aminoacylation for protein translation [GO:0006418]	chloroplast [GO:0009507];cytosol [GO:0005829];mitochondrion [GO:0005739]	aspartate-tRNA ligase activity [GO:0004815];ATP binding [GO:0005524];DNA binding [GO:0003677];metal ion binding [GO:0046872]	28	0	84.518	248	30.3	33.3	38.4	40.5	35.4	36.3	37.8	39.5	F4JJT9	F4JJT9	874	At4g33760	Aspartate--tRNA ligase, chloroplastic/mitochondrial	297;404;642	162;182;227;419;539					359
276769409179688	273344097137451	278949279785156	276608486175537		chloroplast [GO:0009507];chloroplast stroma [GO:0009570]		11	0	24.381	51	27.2	20.5	29.2	24.6	22.3	26.7	21.5	16.9	F4JJY7	F4JJY7	875	At4g34090	Cyclin delta-3		199
262625923156738	269020767211914	26414400100708	254378089904785		cytosol [GO:0005829]	2,3-bisphosphoglycerate-independent phosphoglycerate mutase activity [GO:0046537];metal ion binding [GO:0046872]	18	0	102.27	144	12.2	10.6	14.8	7.1	20.9	19.7	18.7	16.3	F4JK17	F4JK17	876	At4g09520	Cofactor-independent phosphoglycerate mutase	130	176;185;219;225;355
320442352294922	324810409545898	325331077575684	322101058959961	cell cycle [GO:0007049];multicellular organism development [GO:0007275];response to abscisic acid [GO:0009737]	cytoplasm [GO:0005737];plasma membrane [GO:0005886]		85	0	323.31	559	37.4	39.3	37.7	36.7	35.3	33.2	34.4	34.1	F4JKH6	F4JKH6	879	TSS	Protein TSS	93;120;179;195;363;404;587;1047;1437;1558	174;353;436;440;532;555;560;568;604;619;625;637;642;663;673;685;697;705;852;872;900;907;917;1046;1155;1168;1170;1214;1554;1562					194;736;864
301494045257568	300903053283691	301021194458008	301721210479736		chloroplast [GO:0009507];chloroplast stroma [GO:0009570];cytosol [GO:0005829]		21	0	209.43	234	54.7	43.3	41.5	42.6	54.7	54.7	54.7	54.3	F4JKZ9	F4JKZ9	880	At4g16060	Uncharacterized protein	188;228;235	103;179;219;240;284		183
301968326568604	299722690582275	301294002532959	300672779083252	NLS-bearing protein import into nucleus [GO:0006607]	cytosol [GO:0005829];host cell nucleus [GO:0042025];nuclear envelope [GO:0005635];nucleolus [GO:0005730];nucleus [GO:0005634];plasmodesma [GO:0009506]	nuclear import signal receptor activity [GO:0061608];nuclear localization sequence binding [GO:0008139]	41	0	323.31	428	55	47.7	56.8	61.3	58.7	50.8	61.9	52.5	F4JL11	F4JL11	881	IMPA2	Importin subunit alpha-2	197;234;268;326;353;423;428;437	8;17;47;48;237;392;452;490
244809303283691	241368045806885	250438098907471	251603107452393	chromatin organization [GO:0006325];flower development [GO:0009908];negative regulation of histone acetylation [GO:0035067];negative regulation of long-day photoperiodism, flowering [GO:0048579];post-embryonic development [GO:0009791];regulation of photoperiodism, flowering [GO:2000028];regulation of transcription, DNA-templated [GO:0006355];seed germination [GO:0009845]	nucleus [GO:0005634]	chromatin binding [GO:0003682];metal ion binding [GO:0046872];methylated histone binding [GO:0035064];transcription regulatory region sequence-specific DNA binding [GO:0000976]	3	0	5.59	17	10.3	10.3	9	9	9	5.1	9	9	F4JL28	F4JL28	882	EBS	Chromatin remodeling protein EBS	129
257506237030029	257191047668457	257021598815918	254591083526611				6	0	5.7697	42	7.8	5.3	5.5	5.5	5.5	3	3	5.5	F4JL78	F4JL78	883	At4g28300	Formin-like protein (DUF1421)		86;101
313317546844482	315231838226318	313590908050537	314133682250977	isoleucyl-tRNA aminoacylation [GO:0006428];response to cadmium ion [GO:0046686]	cytosol [GO:0005829]	aminoacyl-tRNA editing activity [GO:0002161];ATP binding [GO:0005524];isoleucine-tRNA ligase activity [GO:0004822];tRNA binding [GO:0000049]	109	0	323.31	1054	43.9	35.1	44.2	47.1	48.8	47.5	45.3	46.1	F4JLM5	F4JLM5	885	At4g10320	Isoleucine--tRNA ligase, cytoplasmic	5;88;121;186;354;366;430;558;621;783;798;908;1161	8;111;116;134;248;256;276;296;318;370;373;374;401;405;412;414;419;453;455;471;473;519;524;617;631;632;673;674;700;757;852;865;869;918;928;932;939;947;971;1105;1147;1187					801;875
320485305786133	319684638977051	321319465637207	32058177947998	cell redox homeostasis [GO:0045454];oxidation-reduction process [GO:0055114];response to arsenic-containing substance [GO:0046685]	chloroplast [GO:0009507];chloroplast envelope [GO:0009941];chloroplast stroma [GO:0009570];cytosol [GO:0005829]	dihydrolipoyl dehydrogenase activity [GO:0004148];flavin adenine dinucleotide binding [GO:0050660]	50	0	323.31	1028	68.8	67	65.3	70.2	66.8	64.9	66	62.6	F4JLP5	F4JLP5	886	LPD2	Dihydrolipoyl dehydrogenase 2, chloroplastic	122;127;397;438	106;109;131;150;176;186;204;206;215;229;236;307;318;326;336;338;341;404;457;460;464;469;530;551		360;402;518			406;446;490
256583728790283	250805835723877	249743003845215	282263278961182		cytosol [GO:0005829];endoplasmic reticulum [GO:0005783];integral component of membrane [GO:0016021];plasma membrane [GO:0005886]		3	0	7.2705	13	2.6	2.6	2.6	1.3	2.6	1.3	1.3	1.3	F4JLQ2	F4JLQ2	887	At4g16180	Transmembrane protein
268346061706543	267167263031006	266835136413574	269273929595947		peroxisome [GO:0005777]	dioxygenase activity [GO:0051213];metal ion binding [GO:0046872]	7	0	46.529	58	16.8	14.6	16.8	17.3	17.3	18.1	15.1	20.6	F4JLS2	F4JLS2	888	At4g16330	2-oxoglutarate (2OG) and Fe(II)-dependent oxygenase superfamily protein	128	123;321
249471740722656	245900077819824	251201667785645	246618824005127		chloroplast [GO:0009507];cytosol [GO:0005829]	kinase activity [GO:0016301];phosphotransferase activity, alcohol group as acceptor [GO:0016773]	27	0	6.8381	15	51.4	56.8	46.1	47.3	51.4	51.4	51.4	53.4	F4JM15	F4JM15	889	At4g28706	PfkB-like carbohydrate kinase family protein	94;155;271;310;362;380;382	81;107;151;199;204;205;214;215;298;301;319		321			326;370
273092136383057	275111103057861	273878002166748	272860374450684			dioxygenase activity [GO:0051213]	7	0	26.402	79	17.8	15.9	17.8	17.8	24.4	21.3	24.4	21.3	F4JML2	F4JML2	892	At4g16770	2-oxoglutarate (2OG) and Fe(II)-dependent oxygenase superfamily protein		32
249814605712891	245473384857178	245329093933105	NaN	branched-chain amino acid catabolic process [GO:0009083];fatty acid beta-oxidation [GO:0006635]	cytosol [GO:0005829];mitochondrion [GO:0005739]	enoyl-CoA hydratase activity [GO:0004300];methylglutaconyl-CoA hydratase activity [GO:0004490];peptidase activity [GO:0008233]	4	0.00019231	2.8441	5	5.3	7	3.7	0	12.6	7	7	0	F4JML5	F4JML5	893	At4g16800	Probable enoyl-CoA hydratase 2, mitochondrial
309708309173584	309049072265625	311318550109863	311106071472168	defense response to bacterium, incompatible interaction [GO:0009816];post-embryonic development [GO:0009791];protein folding [GO:0006457];protein targeting to chloroplast [GO:0045036];response to cadmium ion [GO:0046686];vegetative to reproductive phase transition of meristem [GO:0010228]	chloroplast [GO:0009507];cytoplasm [GO:0005737];integral component of chloroplast outer membrane [GO:0031359];nucleus [GO:0005634];plasma membrane [GO:0005886]		27	0	323.31	394	76.9	55.7	72	70.3	75.1	68.3	61.7	52.6	F4JN13	F4JN13	895	AKR2	Ankyrin repeat-containing protein 2	267;274;307	7;15;17;70;195;252;273;292;326;333;342;346					132
295592842102051	296608657836914	297285175323486	297364101409912		cytosol [GO:0005829]	endoribonuclease activity [GO:0004521]	20	0	323.31	257	58	52.9	58	58	62.4	41.1	41.1	41.1	F4JNE1	F4JNE1	898	At4g17100	Poly(U)-specific endoribonuclease-B protein	51;72;107	53;76;145;165
243015937805176	246257247924805	248334484100342	251476345062256		integral component of membrane [GO:0016021]	ATP binding [GO:0005524];protein kinase activity [GO:0004672]	3	0	6.1666	14	2.9	1.7	2.9	2.9	1.7	1.7	1.7	1.7	F4JNH2	F4JNH2	900	CRK18	Cysteine-rich RLK (RECEPTOR-like protein kinase) 18	91;94;227;228
260809497833252	257577362060547	257571754455566	253306713104248		integral component of membrane [GO:0016021]		8	0	61.781	39	2.8	10.2	8.6	4.6	5.8	7.1	8.9	8.9	F4JPQ4	F4JPQ4	906	AP22.38	G-protein coupled receptor	130;132;140;150;283
216398448944092	217870807647705	NaN	239385852813721	RNA processing [GO:0006396]		RNA binding [GO:0003723]	24	0	74.176	99	1.3	2.2	0	2.6	2	2.2	0	1.3	F4JQ75	F4JQ75	908	EMB140	EMBRYO DEFECTIVE 140	359;527	285;305;584;596;669;686;690;758
309992713928223	308682060241699	309699382781982	309805316925049	carbohydrate metabolic process [GO:0005975]	chloroplast [GO:0009507];cytosol [GO:0005829];plasma membrane [GO:0005886]	kinase activity [GO:0016301];phosphotransferase activity, alcohol group as acceptor [GO:0016773]	37	0	323.31	487	57	58.9	56.1	57.5	59.6	59.1	61.1	58.4	F4JQ90	F4JQ90	909	At4g30310	FGGY family of carbohydrate kinase	52;65;72;191;195;307;314;319;466;479;498	35;158;211;291;299;380;472;484;522;548;550					119;288;321
288636951446533	288150062561035	287495441436768	287481994628906	photosynthesis [GO:0015979]	chloroplast [GO:0009507];plasma membrane [GO:0005886]		24	0	105.39	151	29.1	21.6	29.7	29.7	22.6	21.8	20.9	23.2	F4JQE2	F4JQE2	910	PDE327	FAD/NAD(P)-binding oxidoreductase family protein		63
290618305206299	291072673797607	290571632385254	291272106170654	lipid metabolic process [GO:0006629]	plasma membrane [GO:0005886]	phosphoric diester hydrolase activity [GO:0008081]	13	0	113.28	158	21.3	22.1	21.3	24.8	23.8	21.1	21.3	18.4	F4JQJ7	F4JQJ7	911	At4g36945	PLC-like phosphodiesterases superfamily protein	340;342;348	65;111;225;226		335
267030582427979	258138694763184	NaN	254197292327881	activation of GTPase activity [GO:0090630];negative regulation of Rho protein signal transduction [GO:0035024];pollen germination [GO:0009846];pollen tube adhesion [GO:0009865];pollen tube development [GO:0048868];pollen tube growth [GO:0009860];positive regulation of GTPase activity [GO:0043547];regulation of growth [GO:0040008];signal transduction [GO:0007165]	apical part of cell [GO:0045177];apical plasma membrane [GO:0016324];cell cortex [GO:0005938];exocytic vesicle [GO:0070382];pollen tube [GO:0090406]	GTPase activator activity [GO:0005096];Rho GTPase binding [GO:0017048]	2	0.0095154	1.4989	8	1.7	1.7	0	1.7	1.7	0	1.7	1.7	F4JQZ3	F4JQZ3	913	REN1	Rho GTPase-activating protein REN1
331463584899902	324884834289551	32223747253418	323708267211914	mitochondrial respiratory chain complex I assembly [GO:0032981];NADH dehydrogenase complex assembly [GO:0010257]	chloroplast [GO:0009507];chloroplast stroma [GO:0009570];cytosol [GO:0005829];vacuole [GO:0005773]	unfolded protein binding [GO:0051082]	51	0	323.31	662	59.2	57.9	54.2	60.1	60.4	58.1	60.3	60	F4JRN8	F4JRN8	915	At4g18810	NAD(P)-binding Rossmann-fold superfamily protein	533	150;161;184;186;190;202;224;253;318;337;414;420;472;481;483;545;550;577;580		109;251;308;309;395			162;236;405
238474712371826	257323913574219	24780065536499	256601428985596	Golgi organization [GO:0007030];intra-Golgi vesicle-mediated transport [GO:0006891];protein transport [GO:0015031];regulation of exocyst localization [GO:0060178]	cytoplasmic vesicle [GO:0031410];Golgi membrane [GO:0000139];Golgi transport complex [GO:0017119];vacuole [GO:0005773]	protein homodimerization activity [GO:0042803]	24	0	182.34	88	2.5	1.2	2.1	1.2	2.2	0	0	0	F4JRR1	F4JRR1	916	COG2	Conserved oligomeric Golgi complex subunit 2	467						186
25332447052002	266066780090332	253186206817627	258192405700684		integral component of membrane [GO:0016021]	ATP binding [GO:0005524];ATPase activity [GO:0016887];ATPase-coupled transmembrane transporter activity [GO:0042626]	6	0	7.5798	25	3.1	8.8	14.7	9	4.6	1.5	8.6	9	F4JSM3	F4JSM3	920	ABCB28	Non-intrinsic ABC protein 8		458
NaN	250760631561279	273321056365967	271756000518799	protein transport [GO:0015031];regulation of ARF protein signal transduction [GO:0032012]	chloroplast [GO:0009507];cytosol [GO:0005829];membrane [GO:0016020];trans-Golgi network [GO:0005802]	ARF guanyl-nucleotide exchange factor activity [GO:0005086]	25	0	37.132	57	0	1.4	0.5	1	0	0.5	1.7	1	F4JSZ5	F4JSZ5	921	BIG1	Brefeldin A-inhibited guanine nucleotide-exchange protein 1		637;644;774;778
NaN	234380950927734	231573677062988	NaN			dioxygenase activity [GO:0051213]	1	0.0047127	1.8636	10	0	2.5	2.5	0	2.5	0	2.5	2.5	F4JT13	F4JT13	922	At4g13400	2-oxoglutarate (2OG) and Fe(II)-dependent oxygenase superfamily protein
293800354003906	294666500091553	293880863189697	290258312225342	mRNA cis splicing, via spliceosome [GO:0045292];regulation of alternative mRNA splicing, via spliceosome [GO:0000381]	nuclear speck [GO:0016607];nucleolus [GO:0005730];nucleus [GO:0005634]	RNA binding [GO:0003723]	4	0	29.369	22	1.6	1.6	1.6	1.6	3.9	1.6	1.6	1.6	F4JT92	F4JT92	924	At4g19610	Nucleotide/nucleic acid binding protein		329
281148567199707	276094989776611	278903541564941	280427570343018	dephosphorylation [GO:0016311];glycerol biosynthetic process [GO:0006114];riboflavin biosynthetic process [GO:0009231]	mitochondrion [GO:0005739]	glycerol-1-phosphatase activity [GO:0000121];glycerol-3-phosphatase activity [GO:0043136];magnesium ion binding [GO:0000287];phosphatase activity [GO:0016791]	23	0	172.78	128	20.1	14.8	21.8	20.1	24.8	28.2	38.6	35.6	F4JTE7	F4JTE7	926	GPP1	(DL)-glycerol-3-phosphatase 1, mitochondrial	175	102;109;170;188;214;236;251
246813716888428	251340255737305	25541353225708	267929039001465	mitotic sister chromatid cohesion [GO:0007064]			15	0	39.815	56	4.5	3.2	5.4	4.8	5	6.3	3	7.2	F4JTF2	F4JTF2	927	At4g31880	Transcriptional regulator	221	118;135;351;577;592
251154117584229	244915504455566	246811561584473	243926391601563		vacuole [GO:0005773]		26	0	134.19	121	8.4	5	2.7	2.7	0	2.3	1.5	1.5	F4JTI1	F4JTI1	928	PHOX4	Protein PHOX4	193;523;583;626	55;231;359;385;517;520;608;769
219732322692871	215987339019775	2201051902771	218010444641113	protein transport [GO:0015031]	cytoplasm [GO:0005737];cytosol [GO:0005829];endosome membrane [GO:0010008]	phosphatidylinositol binding [GO:0035091]	10	0	21.103	24	2.4	2.4	3.6	2.4	2.4	2.4	2.4	3.6	F4JTJ2	F4JTJ2	929	EREL1	PX domain-containing protein EREL1	168;373	408
242839031219482	243565578460693	24345027923584	243753070831299	synaptonemal complex assembly [GO:0007130]	chromosome [GO:0005694];nucleus [GO:0005634]		5	0	3.8705	10	0.9	0.9	4	2.6	0.9	0.9	0.9	0.9	F4JTJ9	F4JTJ9	930	ASY2	Meiosis-specific protein ASY2
321924896240234	322619819641113	323402976989746	322186737060547	cellular amino acid metabolic process [GO:0006520];response to zinc ion [GO:0010043]	endoplasmic reticulum [GO:0005783];Golgi apparatus [GO:0005794];plasma membrane [GO:0005886];secretory vesicle [GO:0099503];vacuole [GO:0005773]	aminoacylase activity [GO:0004046];metallopeptidase activity [GO:0008237]	43	0	323.31	864	82.9	76	81.1	76.9	79.7	76.7	78.5	74.1	F4JTK8	F4JTK8	931	AQI	Peptidase M20/M25/M40 family protein	128	45;55;68;70;127;139;146;169;211;221;233;361;376;403;408;426		90			228
NaN	NaN	233113288879395	240475997924805				5	0	3.6033	25	0	0	2.9	2.9	2.9	10.2	10.2	6.2	F4JTM0	F4JTM0	932	At4g38260	Transport/golgi organization-like protein (DUF833)
238581371307373	238042011260986	243338813781738	NaN				6	0	7.9797	9	2	2	2.5	0	2	2.2	2.5	3.2	F4JTS7	F4JTS7	935	At4g13730	Ypt/Rab-GAP domain of gyp1p superfamily protein		119
292951564788818	292159538269043	292346649169922	294474258422852	COPII-coated vesicle cargo loading [GO:0090110];intracellular protein transport [GO:0006886]	COPII vesicle coat [GO:0030127];cytosol [GO:0005829];endoplasmic reticulum exit site [GO:0070971];endoplasmic reticulum membrane [GO:0005789];Golgi membrane [GO:0000139]	GTPase activator activity [GO:0005096];zinc ion binding [GO:0008270]	43	0	323.31	358	29.1	23.3	27.2	22.5	25.4	30.5	31.2	19.8	F4JUM1	F4JUM1	938	At4g14160	Protein transport protein SEC23	38;65;68;273;288;304;432;565;719	7;9;69;195;202;225;314;324;328;335;336;339;393;397;437;438;501;544;567		229			545
239809379577637	NaN	238831558227539	240016994476318		cytoplasm [GO:0005737]	translation elongation factor activity [GO:0003746]	3	0.0020333	2.17	12	3.4	0	3.4	3.4	3.4	3.4	3.4	3.4	F4JUX3	F4JUX3	940	At4g26310	Elongation factor P (EF-P) family protein
329673118591309	331133117675781	32979679107666	330416603088379	proteolysis [GO:0006508]	chloroplast [GO:0009507];cytoplasm [GO:0005737];cytosol [GO:0005829];cytosolic ribosome [GO:0022626];vacuolar membrane [GO:0005774];vacuole [GO:0005773]	aminopeptidase activity [GO:0004177];serine-type endopeptidase activity [GO:0004252];tripeptidyl-peptidase activity [GO:0008240]	158	0	323.31	1794	59.6	58.2	54	63.7	59.3	53.2	54.3	57.7	F4JVN6	F4JVN6	942	TPP2	Tripeptidyl-peptidase 2	84;126;171;350;402;430;532;630;688;737;814;1136;1174;1176	119;162;164;184;206;217;237;242;249;260;263;268;270;271;279;289;293;325;403;459;605;617;642;671;680;738;821;903;912;925;938;948;950;958;972;985;999;1002;1006;1021;1023;1055;1064;1074;1076;1079;1101;1104;1129;1138;1152;1154;1160;1178;1204;1234;1244;1263;1274;1277;1288;1290;1296;1300;1305;1308;1328;1343		391;470;709;710;965;1051			412;435;613;795;990;1086
257519512176514	270213642120361	260170783996582	272084369659424	L-lysine catabolic process [GO:0019477];response to karrikin [GO:0080167]	cytoplasm [GO:0005737];cytosol [GO:0005829]	saccharopine dehydrogenase (NADP+, L-lysine-forming) activity [GO:0047130];saccharopine dehydrogenase activity [GO:0004753]	62	0	253.6	288	12.8	10.2	9.8	21.1	0.7	0.7	2.3	1.9	F4JVY8	F4JVY8	943	LKR	Lysine-ketoglutarate reductase/saccharopine dehydrogenase bifunctional enzyme	74;83;131;598;684;826;948;956	61;244;339;567;570;578;715;883;914;918;923;928;931;991;1030;1032		14;470
274156265258789	270694828033447	272472610473633	273710250854492	cinnamic acid biosynthetic process [GO:0009800];L-phenylalanine catabolic process [GO:0006559]	cytoplasm [GO:0005737]	phenylalanine ammonia-lyase activity [GO:0045548]	22	0	42.237	67	20.9	10.5	13.9	20.3	18.5	13.3	16.9	18.3	F4JW69	F4JW69	944	PAL3	Phenylalanine ammonia-lyase	686	526;577;669		371
NaN	NaN	214151916503906	207861232757568		CCR4-NOT complex [GO:0030014]		20	0	127.61	99	0	0	2.1	4.8	2.1	0	2.7	2.7	F4JWN4	F4JWN4	945	At5g18420	CCR4-NOT transcription complex subunit	180;255;298;370;374	122;169;270;304;360
NaN	249328308105469	NaN	251573066711426	microtubule-based movement [GO:0007018];trichome branching [GO:0010091]	cytoskeleton [GO:0005856];plasma membrane [GO:0005886]	ATP binding [GO:0005524];microtubule binding [GO:0008017];microtubule motor activity [GO:0003777];oxidoreductase activity [GO:0016491]	8	0	5.5901	18	0	0.6	0	0.6	0.6	0.6	0	0.6	F4JXM5	F4JXM5	951	ZWI	Kinesin-like calmodulin-binding protein (ZWICHEL)
239725494384766	236492176055908	235128002166748	241022148132324		integral component of membrane [GO:0016021]		4	0	3.2632	9	1.1	1.1	0.6	1.8	0	1.8	2.4	3	F4JXY5	F4JXY5	955	At5g11700	Ephrin type-B receptor	290
275594673156738	276265182495117	275920639038086	279075889587402	embryo development ending in seed dormancy [GO:0009793];folic acid-containing compound biosynthetic process [GO:0009396];one-carbon metabolic process [GO:0006730];tetrahydrofolate biosynthetic process [GO:0046654]	cytoplasm [GO:0005737];cytosol [GO:0005829];mitochondrial matrix [GO:0005759];mitochondrion [GO:0005739]	ATP binding [GO:0005524];dihydrofolate synthase activity [GO:0008841];metal ion binding [GO:0046872];tetrahydrofolylpolyglutamate synthase activity [GO:0004326]	10	0	34.945	59	17.5	20.2	13.4	13.4	20.2	13.4	16	16	F4JYE9	F4JYE9	959	DHFS	Dihydrofolate synthetase
232569541931152	222061290740967	231358337402344	225793437957764	mitotic sister chromatid cohesion [GO:0007064]			54	0	181.32	229	2.8	0.8	0.9	0.9	2.5	0.9	0.9	0.7	F4JYL8	F4JYL8	960	At5g47690	Binding protein	438;748;751;1371	4;23;28;520;850;859;1013;1045;1169;1381;1492
232912311553955	25229419708252	237429370880127	232096576690674	N-glycan processing [GO:0006491];protein deglycosylation [GO:0006517]	cytoplasm [GO:0005737];cytosol [GO:0005829];vacuole [GO:0005773]	mannosyl-glycoprotein endo-beta-N-acetylglucosaminidase activity [GO:0033925]	12	0	15.384	46	1.8	1.8	1.8	1.8	1.8	1.8	3.2	2.9	F4JZC2	F4JZC2	963	ENGASE1	Cytosolic endo-beta-N-acetylglucosaminidase 1
254222679138184	253374252319336	249767932891846	248675937652588	mRNA splicing, via spliceosome [GO:0000398];spliceosomal complex assembly [GO:0000245]	catalytic step 2 spliceosome [GO:0071013];plastid [GO:0009536];post-mRNA release spliceosomal complex [GO:0071014];Prp19 complex [GO:0000974];U2-type catalytic step 2 spliceosome [GO:0071007]		7	0	19.622	20	3.3	1.3	1.3	3.3	1.3	1.3	1.3	1.3	F4JZX8	F4JZX8	965	At5g41770	Crooked neck protein, putative / cell cycle protein
236984825134277	249058227539063	233003368377686	227325210571289	abscisic acid-activated signaling pathway [GO:0009738];cellular response to abscisic acid stimulus [GO:0071215];positive regulation of abscisic acid-activated signaling pathway [GO:0009789];regulation of protein import into nucleus [GO:0042306];response to abscisic acid [GO:0009737];response to osmotic stress [GO:0006970]	cytoskeleton [GO:0005856];cytosol [GO:0005829];plasma membrane [GO:0005886];plastid [GO:0009536];vacuolar membrane [GO:0005774];vacuole [GO:0005773]	actin binding [GO:0003779]	65	0	316.69	214	3.7	2.3	4.4	3.7	3	3	4	4.4	F4JZY1	F4JZY1	966	CIP1	COP1-interactive protein 1		122;171;191;224;466;642;673;708;776;857;978;1082;1230;1345
315999221801758	31573169708252	315342674255371	317036762237549		cytoplasm [GO:0005737];cytosol [GO:0005829];mitochondrion [GO:0005739];nucleus [GO:0005634];plastid [GO:0009536]	hydrolase activity [GO:0016787]	36	0	283.32	581	75.6	76.1	71.8	74	70	75.3	73.5	75.3	F4K000	F4K000	968	MJC20.7	Metal-dependent protein hydrolase	62;68;254;274	51;52;76;129;138;142;147;217;231;260;288;294		57;178;193;194			252;287
296071548461914	28829626083374	295160427093506	29881950378418	carbohydrate metabolic process [GO:0005975]		hydrolase activity, hydrolyzing O-glycosyl compounds [GO:0004553]	10	0	72.001	54	20.8	21.3	20.8	21	18.7	18.2	20.8	15.8	F4K020	F4K020	969	BG_PPAP	Beta-1,3-glucanase		57;294
283309535980225	283942756652832	283727703094482	284447040557861	tryptophan metabolic process [GO:0006568]		indole-3-glycerol-phosphate synthase activity [GO:0004425]	14	0	66.626	124	31.3	37.4	35.2	37.1	37.6	30.8	35.4	37.4	F4K083	F4K083	970	MIF21.11	Aldolase-type TIM barrel family protein	206
281456928253174	268204326629639	283391761779785	27889368057251	cell plate assembly [GO:0000919];cytokinesis by cell plate formation [GO:0000911];early endosome to Golgi transport [GO:0034498];intra-Golgi vesicle-mediated transport [GO:0006891]	cytosol [GO:0005829];early endosome [GO:0005769];trans-Golgi network [GO:0005802];TRAPPII protein complex [GO:1990071]		39	0	176.52	288	7.4	5.2	11.5	11.3	7.9	11.8	9.2	11	F4K0C4	F4K0C4	971	TRS130	Trafficking protein particle complex II-specific subunit 130 homolog	652;886;914	43;142;143;456;660;869;1084;1146
253873558044434	246144218444824	244432888031006	246244983673096	regulation of translational fidelity [GO:0006450]	cytoplasm [GO:0005737]	double-stranded RNA binding [GO:0003725];nucleotidyltransferase activity [GO:0016779];tRNA binding [GO:0000049]	3	0	7.388	9	6.6	2.4	12.5	6.6	12.5	5.9	5.9	6.6	F4K0E6	F4K0E6	972	MUP24.1	DHBP synthase RibB-like alpha/beta domain-containing protein		116
303568897247314	304435195922852	304185047149658	30399377822876	isopentenyl diphosphate biosynthetic process, methylerythritol 4-phosphate pathway [GO:0019288];response to bacterium [GO:0009617];systemic acquired resistance, salicylic acid mediated signaling pathway [GO:0009862];terpenoid biosynthetic process [GO:0016114]	chloroplast [GO:0009507];chloroplast envelope [GO:0009941];chloroplast stroma [GO:0009570];plastid [GO:0009536]	4 iron, 4 sulfur cluster binding [GO:0051539];4-hydroxy-3-methylbut-2-en-1-yl diphosphate synthase activity [GO:0046429];iron ion binding [GO:0005506]	48	0	323.31	525	48.9	50.2	53.6	53.2	57.8	51.8	53.6	57.2	F4K0E8	F4K0E8	973	ISPG	4-hydroxy-3-methylbut-2-en-1-yl diphosphate synthase (ferredoxin), chloroplastic	147;180;356;632;644;647	129;183;324;365;368;397;436;501;638;728					247;477
278897151947021	278572120666504	27494421005249	283421897888184		chloroplast [GO:0009507]	nucleoside-triphosphate diphosphatase activity [GO:0047429]	10	0	49.93	78	30.9	36.7	29	27.5	30.4	34.8	34.8	36.7	F4K0M7	F4K0M7	974	At5g66550	Maf-like protein		4;11;48;60;67;111;200
258144798278809	254910907745361	258235473632813	256768054962158	methylation [GO:0032259];vesicle-mediated transport [GO:0016192]	integral component of membrane [GO:0016021]	methyltransferase activity [GO:0008168];nucleic acid binding [GO:0003676]	11	0	45.82	64	5.8	6.1	6.7	5.8	3.9	2.8	4.2	4.2	F4K0R0	F4K0R0	975	MOP10.11	Transducin family protein / WD-40 repeat family protein		939;1041
264634952545166	268107833862305	265155982971191	266004543304443		chloroplast [GO:0009507];chloroplast envelope [GO:0009941];chloroplast stroma [GO:0009570]	hydrolase activity [GO:0016787]	11	0	19.485	61	10.9	12.4	11.1	10.1	12.5	11	8.2	12.3	F4K1G7	F4K1G7	979	MEE13.8	P-loop containing nucleoside triphosphate hydrolases superfamily protein	605;797
28668815612793	287141075134277	288003902435303	287459907531738			oxidoreductase activity [GO:0016491]	22	0	85.722	223	31.5	33.6	44.5	37.4	43.1	44	42.4	39.5	F4K1P8	F4K1P8	980	MJE7.7	FAD-dependent oxidoreductase family protein	148;262;275	97;152;208;238;244;247;284
197720432281494	214697093963623	186474437713623	189951820373535	mRNA destabilization [GO:0061157]	cytoplasm [GO:0005737]	mRNA binding [GO:0003729]	14	0	72.297	41	5.1	5.9	1.8	5.1	5.1	1.8	3.2	1.8	F4K1Z0	F4K1Z0	981	ECT3	YTH domain-containing protein ECT3	406	21;119;292;301;375
261326141357422	264927577972412	261568813323975	264291648864746	histone modification [GO:0016570];transcription elongation from RNA polymerase II promoter [GO:0006368]	Cdc73/Paf1 complex [GO:0016593]		5	0	23.954	13	3.7	3.7	3.7	3.7	3.7	3.7	0	3.7	F4K204	F4K204	982	VIP4	Leo1-like family protein
267215595245361	252322044372559	268334007263184	271557636260986				9	0	14.649	32	1.1	2.5	2.5	2.5	1.1	2.5	2.5	2.5	F4K250	F4K250	983	MUD21.5	Ran-binding protein in the microtubule-organising centre protein	257;333;478
236272277832031	NaN	235527420043945	NaN	autophagosome assembly [GO:0000045];protein transport [GO:0015031]	autophagosome [GO:0005776];cytoplasmic vesicle [GO:0031410];phagophore assembly site [GO:0000407]		3	0.0032937	2.0212	3	4.2	0	4.2	0	4.2	4.2	4.2	4.2	F4K265	F4K265	984	ATG101	Autophagy-related protein 101
297562732696533	298176002502441	297915992736816	298127746582031	folic acid-containing compound biosynthetic process [GO:0009396];lignin biosynthetic process [GO:0009809];one-carbon metabolic process [GO:0006730];quiescent center organization [GO:1904961];root development [GO:0048364];root hair elongation [GO:0048767];root meristem growth [GO:0010449];tetrahydrofolylpolyglutamate biosynthetic process [GO:0046901]	chloroplast [GO:0009507];cytoplasm [GO:0005737];cytosol [GO:0005829];mitochondrion [GO:0005739]	ATP binding [GO:0005524];metal ion binding [GO:0046872];tetrahydrofolylpolyglutamate synthase activity [GO:0004326]	34	0	305.1	383	48.5	39.2	28.9	37.5	41.9	38	37.5	42.7	F4K2A1;REV__Q9MB58	F4K2A1	985	FPGS1	Folylpolyglutamate synthase	127;234;396	89;121;123;284;350;353		418
319962100982666	320434532165527	320075149536133	320105209350586		chloroplast [GO:0009507];cytosol [GO:0005829];plastid [GO:0009536]	serine-type peptidase activity [GO:0008236]	62	0	323.31	860	57.1	61.2	53	52.3	55.9	50	63.7	57.3	F4K2Y3	F4K2Y3	987	MAB16.20	Alpha/beta-Hydrolases superfamily protein	252;288;292;370;555;556;558;574;646	89;130;160;166;172;177;251;285;295;304;432;434;567;571;608;611;616;630;657;666;672;673;674;715;724					265
278901214599609	278250522613525	279522151947021	278102931976318			nucleoside-triphosphate diphosphatase activity [GO:0047429]	16	0	32.916	97	57.8	36.4	50	54.4	47.1	57.3	53.9	54.4	F4K331	F4K331	988	MJB21.15	Maf-like protein	176	9;44;96;112;127;132
301485576629639	301906051635742	300054416656494	301202812194824		chloroplast [GO:0009507];chloroplast stroma [GO:0009570]	5'-nucleotidase activity [GO:0008253];metal ion binding [GO:0046872]	35	0	240.76	320	43.6	43.5	38.6	45.2	41.9	40.2	42.8	41.3	F4K3A9	F4K3A9	989	At5g48960	HAD-superfamily hydrolase, subfamily IG, 5'-nucleotidase	203;431;485	259;319;323;512;531;579;592;601					210;569
291179542541504	288729972839355	288255672454834	286340522766113	protein stabilization [GO:0050821];response to cold [GO:0009409];rRNA processing [GO:0006364]	chloroplast [GO:0009507];ribonucleoprotein complex [GO:1990904]	GTP binding [GO:0005525];GTPase activity [GO:0003924];translation elongation factor activity [GO:0003746]	19	0	69.388	57	33.6	36.7	33.6	36.4	24.6	25.8	25.2	20.9	F4K410	F4K410	992	SVR3	Putative elongation factor TypA-like SVR3, chloroplastic	615	146;372;378		613				615
244245109558105	240258884429932	244009990692139	241275463104248				2	0	4.056	46	10.3	10.3	10.3	10.3	10.3	10.3	10.3	10.3	F4K464	F4K464	994	At5g20190	Tetratricopeptide repeat (TPR)-like superfamily protein
227083892822266	19913990020752	242378311157227	21955286026001	cellular response to hypoxia [GO:0071456];response to cold [GO:0009409];response to karrikin [GO:0080167];response to oxidative stress [GO:0006979]	chloroplast [GO:0009507];cytosol [GO:0005829];plasmodesma [GO:0009506]	catalytic activity [GO:0003824];mRNA binding [GO:0003729]	55	0	282.51	314	2.7	1.3	4.4	2.4	0.8	0.8	0	0	F4K470	F4K470	996	DIN10	Raffinose synthase family protein	166;212;481;634;712;791	99;112;150;280;333;356;357;368;372;384;458;605;613;675;682;736;789;801;803;835		208;709
288426303863525	278719120025635	292292881011963	290193767547607	DNA repair [GO:0006281]	plasmodesma [GO:0009506]	DNA polymerase binding [GO:0070182]	4	0	3.6628	17	2.6	2.1	1.6	1.4	1.2	0.5	1.6	0.5	F4K4R1	F4K4R1	1001	At5g49110	Fanconi anemia group I-like protein		260;650
231029357910156	232306079864502	202546501159668	231140384674072	regulation of double-strand break repair [GO:2000779]	mitochondrion [GO:0005739];nucleus [GO:0005634];plastid [GO:0009536]	histone binding [GO:0042393]	14	0	27.127	56	1.9	3.7	1.8	5.7	11.4	11.4	15.9	12.5	F4K4Y5	F4K4Y5	1002	MDF20.10	DEK domain-containing chromatin associated protein		39;83;144;348;402
30539176940918	306623783111572	30578577041626	306507015228271	protein catabolic process [GO:0030163];proteolysis [GO:0006508]	cell wall [GO:0005618]	aspartic-type endopeptidase activity [GO:0004190]	27	0	78.707	304	30.8	38.9	38.5	34.5	40	37.6	37.6	33.8	F4K5B9	F4K5B9	1004	MOJ9.20	Eukaryotic aspartyl protease family protein	181;220;261;374	214;286;344;359		444			109;247
286537265777588	286671581268311	285007400512695	284866943359375	actin filament organization [GO:0007015];actin filament-based movement [GO:0030048];cell division [GO:0051301];fruit development [GO:0010154];Golgi localization [GO:0051645];gynoecium development [GO:0048467];leaf pavement cell development [GO:0090436];mitochondrion localization [GO:0051646];peroxisome localization [GO:0060151];post-embryonic development [GO:0009791];root hair cell tip growth [GO…	actin cytoskeleton [GO:0015629];cytoplasm [GO:0005737];myosin complex [GO:0016459];plasmodesma [GO:0009506];root hair tip [GO:0035619];transport vesicle [GO:0030133];vesicle [GO:0031982]	actin filament binding [GO:0051015];actin-dependent ATPase activity [GO:0030898];ATP binding [GO:0005524];calmodulin binding [GO:0005516];microfilament motor activity [GO:0000146];motor activity [GO:0003774]	65	0	205.6	223	0.7	2	0.7	0.7	1.4	0.7	1.9	1.4	F4K5J1	F4K5J1	1005	XI-K	Myosin-17	226;245;357;653;664;769;775;1289	167;205;670;704;953;986;1023;1037;1067					377
262624320983887	259319515228271	260661792755127	259015712738037	cysteine biosynthetic process from serine [GO:0006535];cysteine homeostasis [GO:0080145];response to oxidative stress [GO:0006979];stress response to cadmium ion [GO:1990170]	cytoplasm [GO:0005737]	cystathionine gamma-lyase activity [GO:0004123];cysteine synthase activity [GO:0004124];L-cysteine desulfhydrase activity [GO:0080146];L-cystine L-cysteine-lyase (deaminating) [GO:0044540];pyridoxal phosphate binding [GO:0030170]	9	0.0022144	2.14	8	27.2	29.7	27.2	27.2	15.8	18.3	23.2	22.3	F4K5T2	F4K5T2	1008	DES1	Bifunctional cystathionine gamma-lyase/cysteine synthase		57;62					99
25510326385498	239171600341797	256283683776855	254635429382324	defense response [GO:0006952];defense response to fungus [GO:0050832];defense response to insect [GO:0002213];response to wounding [GO:0009611]		serine-type endopeptidase inhibitor activity [GO:0004867]	7	0	40.128	26	9.1	10.1	9.1	37.4	9.1	9.1	9.1	19.2	F4K627	F4K627	1011	UPI	Serine protease inhibitor, potato inhibitor I-type family protein	79	27;52
233749103546143	233046607971191	243794116973877	245877780914307		mitochondrion [GO:0005739];plastid [GO:0009536]	copper ion binding [GO:0005507];oxidoreductase activity [GO:0016491]	13	0	64.283	51	7.7	5.4	8.5	14.9	6.3	8.5	9.9	5.6	F4K658	F4K658	1012	At5g49555	FAD/NAD(P)-binding oxidoreductase family protein	66;76;101;527	136;554
289209060668945	287222423553467	287182960510254	288348484039307			hydrolase activity [GO:0016787]	22	0	101.23	163	19.3	22.6	15.5	18.5	18.4	18.7	18.4	16.4	F4K6N3	F4K6N3	1014	At5g07360	Amidase family protein	380;411;417	228;231;427
282874050140381	283720226287842	284712314605713	285855960845947		cell wall [GO:0005618];extracellular region [GO:0005576];plasmodesma [GO:0009506]	copper ion binding [GO:0005507];oxidoreductase activity [GO:0016491]	16	0	94.314	126	19.2	27.7	25.9	24.5	18.4	14.6	24.1	24.7	F4K6Z5	F4K6Z5	1015	At5g21105	Plant L-ascorbate oxidase	53;575	512;567		207
245855464935303	231206340789795	236435031890869	236497650146484			RNA binding [GO:0003723]	12	0	33.021	39	3.4	2.4	2.2	2	0	3	1	0	F4K703	F4K703	1016	LARP1a	LA RNA-binding protein	738	814;821		415;420
NaN	25037036895752	250811939239502	246953525543213	actin filament organization [GO:0007015];actin filament-based movement [GO:0030048];Golgi localization [GO:0051645];gynoecium development [GO:0048467];leaf pavement cell development [GO:0090436];mitochondrion localization [GO:0051646];peroxisome localization [GO:0060151];root hair elongation [GO:0048767];trichome morphogenesis [GO:0010090]	cytosol [GO:0005829];myosin complex [GO:0016459];peroxisome [GO:0005777]	actin binding [GO:0003779];ATP binding [GO:0005524];GTP-dependent protein binding [GO:0030742];motor activity [GO:0003774];Rab GTPase binding [GO:0017137]	31	0	101.76	89	0	0.6	0.6	1.3	0	1.3	0.6	0.7	F4K7C5	F4K7C5	1018	MYA2	Myosin 2	305;423;712;723;1171;1335
250465183258057	249190254211426	250107765197754	2541770362854			kinase activity [GO:0016301];phosphotransferase activity, alcohol group as acceptor [GO:0016773]	3	0	6.9459	9	6.6	6.6	6.6	6.6	6.6	6.6	6.6	6.6	F4K7C7	F4K7C7	1019	At5g43910	PfkB-like carbohydrate kinase family protein	58
253320388793945	257978839874268	NaN	254960689544678			tRNA methyltransferase activity [GO:0008175]	2	0	3.0251	11	13.1	13.1	0	13.1	13.1	0	13.1	13.1	F4K7Z6	F4K7Z6	1020	At5g01230	S-adenosyl-L-methionine-dependent methyltransferases superfamily protein
257722835540771	251087684631348	255084838867188	260348777770996	dephosphorylation of RNA polymerase II C-terminal domain [GO:0070940];developmental growth [GO:0048589];response to auxin [GO:0009733];response to osmotic stress [GO:0006970]		phosphatase activity [GO:0016791];RNA binding [GO:0003723];RNA polymerase II CTD heptapeptide repeat phosphatase activity [GO:0008420]	7	0	6.8518	19	3.1	4.4	3.1	1.2	3.1	0	0	3.1	F4K802	F4K802	1021	CPL2	Carboxyl-terminal domain (Ctd) phosphatase-like 2		317					155
282059230804443	283702774047852	279345531463623	278541240692139	exocytosis [GO:0006887];protein transport [GO:0015031]	cytosol [GO:0005829];exocyst [GO:0000145];plasma membrane [GO:0005886]		13	0	19.333	39	2.8	2.8	2.8	2.8	2.8	2.8	2.8	2.8	F4K8Y6	F4K8Y6	1023	EXO70F1	Exocyst subunit Exo70 family protein
255349864959717	245554351806641	253701934814453	251453037261963		plasmodesma [GO:0009506]		4	0	4.2855	8	5.3	3.8	5.3	5.3	5.3	2.2	2.2	7.3	F4K940	F4K940	1024	MIK19.5	Uncharacterized protein
258028450012207	259013404846191	261628475189209	264136257171631	protein phosphorylation [GO:0006468]	integral component of membrane [GO:0016021];plasma membrane [GO:0005886]	ATP binding [GO:0005524];transmembrane receptor protein serine/threonine kinase activity [GO:0004675]	6	0	16.801	29	2.7	4.2	6	2.7	1.2	4.2	2.7	2.7	F4K946	F4K946	1025	At5g56890	Protein kinase superfamily protein							520
244850521087646	245624408721924	258927059173584	260639190673828		cytoplasm [GO:0005737];cytosol [GO:0005829];nucleus [GO:0005634]	zinc ion binding [GO:0008270]	17	0	130.29	84	5.1	6.1	14.8	17.6	9.9	2.2	10.1	2	F4K9W6	F4K9W6	1027	MQJ16.2	ZPR1 zinc-finger domain protein	64;67;85;86	4;105;167;334;336		246
334320373535156	347611427307129	338094291687012	337941093444824	carbon fixation [GO:0015977];photorespiration [GO:0009853];photosynthesis [GO:0015979]	chloroplast [GO:0009507]	monooxygenase activity [GO:0004497];ribulose-bisphosphate carboxylase activity [GO:0016984]	26	0	323.31	378	67.2	66.1	67.2	67.2	67.2	67.2	67.2	67.2	F4KA76	F4KA76	1031	RBCS3B	Ribulose bisphosphate carboxylase small chain	125;138;160	64;65;66;83;119;133;139;140;167		154	125;138;160	125;138
253036842346191	253839340209961	253674640655518	25321720123291	methylation [GO:0032259]		methyltransferase activity [GO:0008168]	4	0	5.5611	22	11.7	8.1	5.4	6.3	2.4	6.3	13.5	13.5	F4KAB4	F4KAB4	1032	At5g44600	S-adenosyl-L-methionine-dependent methyltransferases superfamily protein	193
311681804656982	317606182098389	31122875213623	312525386810303	DNA replication initiation [GO:0006270];DNA unwinding involved in DNA replication [GO:0006268];double-strand break repair via break-induced replication [GO:0000727];mitotic DNA replication [GO:1902969];pre-replicative complex assembly involved in nuclear cell cycle DNA replication [GO:0006267]	MCM complex [GO:0042555];nucleus [GO:0005634];THO complex [GO:0000347]	ATP binding [GO:0005524];DNA helicase activity [GO:0003678];DNA replication origin binding [GO:0003688];metal ion binding [GO:0046872];single-stranded DNA binding [GO:0003697]	14	0	19.514	48	2.5	1.4	2.5	2.5	2.5	2.5	2.5	2.5	F4KAB8	F4KAB8	1033	MCM6	DNA replication licensing factor MCM6	392;399;789	778
256299819946289	25781343460083	254857883453369	258293170928955			syntaxin binding [GO:0019905]	4	0.0034722	1.9861	8	2.2	2.2	2.2	2.2	2.2	2.2	2.2	2.2	F4KAG0	F4KAG0	1034	At5g50840	Alpha-taxilin-like protein
244324989318848	245817584991455	243912620544434	23815092086792		chloroplast [GO:0009507]		2	0	5.7179	14	10.3	10.3	10.3	10.3	16.4	10.3	10.3	10.3	F4KAK0	F4KAK0	1035	MUL3.12	Tautomerase/MIF superfamily protein
275769386291504	279614086151123	278012542724609	28039831161499	cell morphogenesis [GO:0000902]	cell cortex [GO:0005938];plasma membrane [GO:0005886];site of polarized growth [GO:0030427]		16	0	30.506	57	0.9	1.4	1.3	1.3	1	0.9	0.9	1.3	F4KB73	F4KB73	1036	At5g15680	ARM repeat superfamily protein	751
27836051940918	274315738677979	274669208526611	278022422790527	fatty acid metabolic process [GO:0006631]	peroxisome [GO:0005777]	ligase activity [GO:0016874]	29	0	142.02	157	12.9	11.7	16.1	14.8	14.3	11.2	15.1	12.8	F4KBF3	F4KBF3	1037	AAE17	Probable acyl-activating enzyme 17, peroxisomal	383	322;702
300861339569092	29763557434082	303982563018799	299404182434082	tetrahydrobiopterin biosynthetic process [GO:0006729]		4-alpha-hydroxytetrahydrobiopterin dehydratase activity [GO:0008124]	10	0	135.17	103	63.7	45.6	63.7	63.7	42	30.1	32.6	23.8	F4KBV0	F4KBV0	1039	MWD22.5	Transcriptional coactivator/pterin dehydratase	77;125	98;113;135;181					173
278229274749756	273509387969971	274415817260742	273689460754395	defense response to fungus [GO:0050832];protein ubiquitination [GO:0016567];regulation of lipid catabolic process [GO:0050994];regulation of seed germination [GO:0010029];response to abscisic acid [GO:0009737];ubiquitin-dependent protein catabolic process [GO:0006511];ubiquitin-dependent protein catabolic process via the N-end rule pathway [GO:0071596]	cytoplasm [GO:0005737];ubiquitin ligase complex [GO:0000151]	ubiquitin protein ligase activity [GO:0061630];ubiquitin-protein transferase activity [GO:0004842];zinc ion binding [GO:0008270]	14	0	11.326	41	2.1	2.1	2.1	2.1	2.1	0.5	2.1	2.1	F4KCC2	F4KCC2	1041	PRT6	E3 ubiquitin-protein ligase PRT6	955;1436;1439
NaN	245015449523926	244600143432617	247012348175049		U5 snRNP [GO:0005682]		2	0	7.6761	11	0	3.7	3.7	3.7	0	0	0	0	F4KCL2	F4KCL2	1043	At5g09390	CD2-binding protein-like protein
231494979858398	231898155212402	227464065551758	227072086334229		plasma membrane [GO:0005886]		1	0.0071073	1.5844	10	2.9	2.9	2.9	2.9	2.9	2.9	2.9	2.9	F4KCX6	F4KCX6	1045	MQM1.23	Uncharacterized protein		287
255152378082275	250136756896973	25586633682251	255414123535156		apoplast [GO:0048046];cell wall [GO:0005618]	manganese ion binding [GO:0030145];nutrient reservoir activity [GO:0045735]	3	0	8.2068	38	13	13	8	8	8	8	8	8	F4KD16	F4KD16	1046	At5g39160	Germin-like protein
271106815338135	271314373016357	269362945556641	268545989990234			hydrolase activity [GO:0016787]	11	0	44.196	92	16.8	19.1	24.3	18.1	35	34.6	28.8	27.2	F4KDK1	F4KDK1	1047	MCK7.7	Calcineurin-like metallo-phosphoesterase superfamily protein	148	280;282
308718090057373	306645832061768	30445592880249	304065933227539	embryo development ending in seed dormancy [GO:0009793];tRNA aminoacylation for protein translation [GO:0006418];valyl-tRNA aminoacylation [GO:0006438]	chloroplast [GO:0009507];chloroplast stroma [GO:0009570];cytosol [GO:0005829];mitochondrion [GO:0005739]	aminoacyl-tRNA editing activity [GO:0002161];ATP binding [GO:0005524];valine-tRNA ligase activity [GO:0004832]	59	0	179.82	464	44.8	44.4	41.4	41	41.5	36.8	40.8	41.3	F4KE63	F4KE63	1048	EMB2247	Valine--tRNA ligase, chloroplastic/mitochondrial 2	202;376;467;488	80;186;196;330;338;353;386;400;435;443;645;788;834;854;915;931;935;966
NaN	249749565124512	248493824005127	NaN	cortical microtubule organization [GO:0043622];response to abscisic acid [GO:0009737]		kinase activity [GO:0016301];protein tyrosine phosphatase activity [GO:0004725];protein tyrosine/serine/threonine phosphatase activity [GO:0008138]	10	0	8.6876	26	1	2.5	2.5	1	1	2.5	1	1	F4KE96	F4KE96	1049	PHS1	Dual specificity protein phosphatase family protein
260443305969238	258125228881836	260912990570068	NaN	regulation of protein serine/threonine phosphatase activity [GO:0080163];regulation of signal transduction [GO:0009966]	nucleus [GO:0005634];plastid [GO:0009536]	protein phosphatase inhibitor activity [GO:0004864]	4	0	7.2208	14	7.8	7.8	7.8	0	0	7.8	7.8	15	F4KEU1	F4KEU1	1050	I-2	Phosphoprotein phosphatase inhibitor	18	85
NaN	NaN	246795463562012	244112510681152		cytosol [GO:0005829]	adenosine 5'-monophosphoramidase activity [GO:0043530];adenylylsulfatase activity [GO:0047627];bis(5'-adenosyl)-triphosphatase activity [GO:0047710];nucleotide binding [GO:0000166]	2	0	9.9386	2	0	0	26.1	7.2	7.2	0	0	26.1	F4KEV7	F4KEV7	1051	FHIT	Bifunctional bis(5'-adenosyl)-triphosphatase/adenylylsulfatase FHIT
250220413208008	NaN	26208065032959	NaN	intracellular signal transduction [GO:0035556];peptidyl-serine phosphorylation [GO:0018105]	cytosol [GO:0005829]	ATP binding [GO:0005524];kinase activity [GO:0016301];protein serine/threonine kinase activity [GO:0004674]	10	0	81.702	32	1.6	0	1.6	0	3.3	1.6	1.6	0	F4KFD4	F4KFD4	1052	MYH9.10	Non-specific serine/threonine protein kinase	247;384
275227546691895	273868961334229	274771499633789	272904396057129	thiamine biosynthetic process [GO:0009228]	cytosol [GO:0005829];mitochondrion [GO:0005739]	thiaminase activity [GO:0050334];thiamine phosphate phosphatase activity [GO:0042131]	19	0	47.515	138	15.9	18.8	13.3	14.6	21.6	20.4	20.9	19	F4KFT7	F4KFT7	1053	TH2	Bifunctional TH2 protein, mitochondrial	124;396;440	420;428
298646240234375	294331073760986	29959888458252	294710960388184			serine-type endopeptidase activity [GO:0004252]	23	0	122.51	187	48.6	38.7	44.5	47.2	41.2	48.4	41.2	43.8	F4KFV6	F4KFV6	1054	DEG8	Trypsin family protein with PDZ domain-containing protein	244	200;213;219;228;231;327;365;396		180;350
29547492980957	291927471160889	29530179977417	294278240203857		nucleolus [GO:0005730];plastid [GO:0009536]	GTP binding [GO:0005525];GTPase activity [GO:0003924]	58	0	257.86	401	28.3	25.3	28.7	24.1	26.5	21.9	22.2	22.9	F4KG14	F4KG14	1056	MCL19.12	Guanylate-binding family protein	47;76;451;476;579;1038	10;50;52;249;288;390;540;545;567;584;606;652;666;709;727;761;770;788;817;819;945		402
278802280426025	276174392700195	282349834442139	277057628631592	fructose 1,6-bisphosphate metabolic process [GO:0030388];gluconeogenesis [GO:0006094];glycolytic process [GO:0006096]	cytosol [GO:0005829]	fructose-bisphosphate aldolase activity [GO:0004332]	21	0	27.497	84	22.9	22.9	32.6	37.7	26.7	39.4	36.4	31.3	F4KGQ0	F4KGQ0	1059	FBA4	Fructose-bisphosphate aldolase 4, cytosolic	164;207;242	72;165;166;346;362		210
308578643798828	307654075622559	308642253875732	308038578033447	lytic vacuole organization [GO:0080171]	chloroplast [GO:0009507];cytosol [GO:0005829];plasma membrane [GO:0005886]	kinase activity [GO:0016301]	189	0	323.31	1399	26	23.4	28.1	26.2	18.4	17.7	21.5	21	F4KHD5	F4KHD5	1060	MPO12.160	A-kinase anchor-like protein	176;465;642;700;1107;1322;1400;1560;1922	15;97;100;133;134;182;254;261;274;277;293;309;353;356;382;418;431;440;483;485;515;575;593;612;618;663;666;675;705;711;731;736;777;844;862;942;976;982;1005;1032;1071;1087;1177;1185;1197;1204;1211;1234;1268;1271;1306;1366;1369;1418;1420;1578;1632;1635;1656;1664;1669;1671;1738;1845;1878;1882;1950;1986;2013;2021;2135;2140;2142;2151;2162;2250;2290;2502;2623;2643;2687;2720;2773;2801		200;207
279044342041016	280754623413086	274787712097168	281484107971191		chloroplast thylakoid lumen [GO:0009543];thylakoid lumen [GO:0031977]	endopeptidase activity [GO:0004175];serine-type peptidase activity [GO:0008236]	24	0	88.135	124	28.4	29.7	27.8	33.1	39.7	45.8	42.1	39.7	F4KHG6	F4KHG6	1061	CTPA1	Carboxyl-terminal-processing peptidase 1, chloroplastic	416	194;269;299;417;477		302
NaN	234879970550537	NaN	209742126464844			serine-type endopeptidase activity [GO:0004252]	19	0	70.618	108	0	4.2	0	2.6	0	0	0	0	F4KHS1	F4KHS1	1063	SBT4.12	Subtilase 4.12	390;615	335;348;350;614
256523933410645	248806838989258	214081573486328	260592231750488	pollen development [GO:0009555]	plasma membrane [GO:0005886];plastid [GO:0009536]		55	0	317.84	281	1.5	1.5	1.5	2.6	2.6	2.6	3.5	3.5	F4KIH8	F4KIH8	1066	MXC17.10	Transducin/WD40 repeat-like superfamily protein	139;140;169;331;903	75;77;131;256;466;547;794;963;1013;1045;1136;1140;1160					152
234516143798828	252945995330811	NaN	247608604431152			hydrolase activity [GO:0016787]	5	0	8.0418	19	6.4	4.3	0	10.7	0	4.3	0	0	F4KJ69	F4KJ69	1069	At5g59480	Haloacid dehalogenase-like hydrolase (HAD) superfamily protein
249213886260986	265639972686768	247148151397705	247899971008301	autophagosome assembly [GO:0000045];autophagy of mitochondrion [GO:0000422];autophagy of nucleus [GO:0044804];autophagy of peroxisome [GO:0030242];defense response to bacterium, incompatible interaction [GO:0009816];defense response to fungus [GO:0050832];leaf senescence [GO:0010150];protein transport [GO:0015031]	extrinsic component of membrane [GO:0019898];phagophore assembly site [GO:0000407]		9	0	7.8369	14	0.6	1.1	1.1	1.6	1.8	0.5	0	0	F8S296	F8S296	1070	ATG2	Autophagy-related protein 2		114;177		6			1
386328086853027	386122856140137	385897254943848	385479011535645	photorespiration [GO:0009853];reductive pentose-phosphate cycle [GO:0019253];response to abscisic acid [GO:0009737];response to cadmium ion [GO:0046686]	apoplast [GO:0048046];cell wall [GO:0005618];chloroplast [GO:0009507];chloroplast envelope [GO:0009941];chloroplast stroma [GO:0009570];chloroplast thylakoid membrane [GO:0009535];cytosolic ribosome [GO:0022626];plastid [GO:0009536];plastoglobule [GO:0010287];thylakoid [GO:0009579]	magnesium ion binding [GO:0000287];monooxygenase activity [GO:0004497];ribulose-bisphosphate carboxylase activity [GO:0016984]	97	0	323.31	9549	76.6	76.6	77.7	76.6	76.6	76.6	76.6	76.6	O03042;REV__Q9FRK9	O03042	1072	rbcL	Ribulose bisphosphate carboxylase large chain	172;192;221;247;284;427;449;459	8;14;18;21;32;81;146;161;164;175;177;183;201;227;236;252;305;316;334;356;450;463;474		163;184;205;207;241;277;287;306;432;442;468	172;192;221;247;284;427;449;459	172;192;247;284;427;449;459	212;250;266;297;309	284
267609100341797	25798698425293	257313289642334	256847724914551	defense response to fungus [GO:0050832];response to desiccation [GO:0009269];response to high light intensity [GO:0009644];response to wounding [GO:0009611]	cytosol [GO:0005829]		8	0	20.277	21	15.2	29.1	5.3	29.1	37.1	29.1	42.4	34.4	O03983	O03983	1073	LEA14	Probable desiccation-related protein LEA14	58	7;15;21
212727012634277	214251136779785	226605548858643	220134868621826	cellular response to heat [GO:0034605];protein folding [GO:0006457];protein stabilization [GO:0050821]	apoplast [GO:0048046];cell surface [GO:0009986];cell wall [GO:0005618];chloroplast stroma [GO:0009570];cytoplasm [GO:0005737];cytosol [GO:0005829];Golgi apparatus [GO:0005794];nucleus [GO:0005634];perinuclear region of cytoplasm [GO:0048471];plasma membrane [GO:0005886];plastid [GO:0009536];protein-containing complex [GO:0032991];vacuolar membrane [GO:0005774]	ATP binding [GO:0005524];unfolded protein binding [GO:0051082]	114	0	106.75	94	62.1	58.9	64.1	62.7	63.9	64.2	61.4	62.5	O03986	O03986	1074	HSP90-4	Heat shock protein 90-4	345;391;543;568;569	45;54;56;71;87;140;173;192;196;197;212;216;227;228;241;243;250;252;263;265;271;277;285;298;316;326;327;328;333;378;381;390;402;407;414;417;429;440;449;456;470;471;481;483;484;510;511;517;521;529;530;536;538;544;547;553;556;586;591;602;603		38;73;74;92;93;289;368;377;415;426;475;580;611	391		85;183;581;605;614
244030818939209	251642684936523	247094612121582	249306221008301	embryo sac development [GO:0009553];glucose mediated signaling pathway [GO:0010255];pollen development [GO:0009555];positive regulation of RNA polymerase II transcription preinitiation complex assembly [GO:0045899];proteasomal protein catabolic process [GO:0010498];regulation of transcription by RNA polymerase II [GO:0006357]	cytosol [GO:0005829];extracellular region [GO:0005576];nucleus [GO:0005634];plasma membrane [GO:0005886];proteasome complex [GO:0000502];proteasome regulatory particle, base subcomplex [GO:0008540];protein-containing complex [GO:0032991]	ATP binding [GO:0005524];hydrolase activity [GO:0016787]	37	0	27.211	23	9.9	9	7.3	7.3	5.2	2.1	2.4	1.9	O04019	O04019	1075	RPT5B	26S proteasome regulatory subunit 6A homolog B	105;224;265;384	39;53;62;64;104;109;157;164;250;311;335;414;415		229;376			159;190
271509304046631	276960430145264	266517105102539	270453109741211	cellular response to hypoxia [GO:0071456];protein targeting to vacuole [GO:0006623]	endoplasmic reticulum [GO:0005783];endoplasmic reticulum membrane [GO:0005789];extracellular region [GO:0005576];integral component of membrane [GO:0016021];plasma membrane [GO:0005886];protein storage vacuole [GO:0000326];protein storage vacuole membrane [GO:0032586]		10	0	27.361	33	15.1	14.8	16	13.6	5.2	12	10.8	19.1	O04023	O04023	1076	SRC2	Protein SRC2 homolog	49	47;52;106
241916694641113	NaN	236523933410645	236178455352783			phosphatase activity [GO:0016791]	5	0	24.859	15	7.1	0	7.1	7.1	7.1	7.1	7.1	7.1	O04035	O04035	1077	At1g08940	Phosphoglycerate mutase-like protein AT74H	66;210
290938587188721	290762519836426	289716663360596	28690357208252	response to karrikin [GO:0080167]	chloroplast [GO:0009507];chloroplast stroma [GO:0009570]	2 iron, 2 sulfur cluster binding [GO:0051537];electron transfer activity [GO:0009055];metal ion binding [GO:0046872]	4	0	99.936	46	57.4	57.4	57.4	57.4	57.4	57.4	57.4	57.4	O04090	O04090	1078	FD1	Ferredoxin-1, chloroplastic	70;91;96;99;129	102				96;99	121
312439403533936	312273941040039	313334617614746	314635829925537	cellular amino acid metabolic process [GO:0006520];L-serine biosynthetic process [GO:0006564]	chloroplast [GO:0009507];chloroplast stroma [GO:0009570];cytosol [GO:0005829];nucleus [GO:0005634]	NAD binding [GO:0051287];phosphoglycerate dehydrogenase activity [GO:0004617]	46	0	323.31	523	56.6	57.1	60.3	58	51.4	47.8	52.4	46.8	O04130	O04130	1079	PGDH2	D-3-phosphoglycerate dehydrogenase 2, chloroplastic	107;169;339	82;90;117;118;119;143;205;208;213;231;241;291;300;302;345;366;428;478;480;590;605					193;245;594
270888137817383	272585372924805	271745529174805	271136646270752	cyclic nucleotide metabolic process [GO:0009187];tRNA splicing, via endonucleolytic cleavage and ligation [GO:0006388]	cytoplasm [GO:0005737];cytosol [GO:0005829]	2',3'-cyclic-nucleotide 3'-phosphodiesterase activity [GO:0004113]	12	0	63.714	73	29.8	29.8	34.3	58	53.6	42.5	43.6	35.4	O04147	O04147	1080	At4g18930	Cyclic phosphodiesterase	64;110;177	6;138
314623165130615	315703220367432	31489559173584	315081005096436	endoplasmic reticulum unfolded protein response [GO:0030968];protein folding [GO:0006457];response to cadmium ion [GO:0046686];response to endoplasmic reticulum stress [GO:0034976];response to oxidative stress [GO:0006979]	endoplasmic reticulum [GO:0005783];endoplasmic reticulum lumen [GO:0005788];endoplasmic reticulum membrane [GO:0005789];mitochondrion [GO:0005739];nucleus [GO:0005634];plasmodesma [GO:0009506];secretory vesicle [GO:0099503];vacuolar membrane [GO:0005774]	calcium ion binding [GO:0005509];carbohydrate binding [GO:0030246];unfolded protein binding [GO:0051082]	60	0	323.31	612	70.4	68.9	75.1	83.3	70.6	64.5	75.8	68.5	O04151	O04151	1081	CRT1	Calreticulin-1	108;140;166	36;40;44;45;90;92;101;105;114;145;146;162;209;210;217;218;235;244;283;285;290;292;294;304;314;316;344;345;353;355;359;367;368;407;413		300			113;134;297
317004566192627	316473159790039	316248817443848	315521087646484	anthocyanin-containing compound metabolic process [GO:0046283];defense response to bacterium [GO:0042742];endoplasmic reticulum unfolded protein response [GO:0030968];innate immune response-activating signal transduction [GO:0002758];plant-type hypersensitive response [GO:0009626];protein folding [GO:0006457]	endoplasmic reticulum [GO:0005783];endoplasmic reticulum lumen [GO:0005788];endoplasmic reticulum membrane [GO:0005789];extracellular region [GO:0005576]	calcium ion binding [GO:0005509];carbohydrate binding [GO:0030246];unfolded protein binding [GO:0051082]	46	0	323.31	499	63.7	60.6	62.7	64.9	64.9	68.6	64.9	65.8	O04153	O04153	1082	CRT3	Calreticulin-3	114;146;172;343	50;65;73;82;89;120;152;167;168;198;282;286;288;291;296;298;300;322;365;373		79
286133689880371	284548168182373	281032466888428	278352699279785	amylopectin biosynthetic process [GO:0010021];starch biosynthetic process [GO:0019252];starch catabolic process [GO:0005983]	chloroplast [GO:0009507];chloroplast isoamylase complex [GO:0010368]	isoamylase activity [GO:0019156]	17	0	45.334	81	7.8	13.9	12.1	10.9	22.3	15.1	16.6	16.6	O04196	O04196	1084	ISA1	Isoamylase 1, chloroplastic		60;754
266777477264404	259516258239746	264046573638916	270354862213135	anther dehiscence [GO:0009901];defense response [GO:0006952];defense response to bacterium [GO:0042742];defense response to fungus [GO:0050832];extracellular ATP signaling [GO:0106167];jasmonic acid and ethylene-dependent systemic resistance [GO:0009861];jasmonic acid mediated signaling pathway [GO:0009867];negative regulation of defense response [GO:0031348];protein ubiquitination [GO:0016567];r…			12	0	20.518	56	10.5	6.2	6.8	8.6	12	11.5	12.5	16	O04197	O04197	1085	COI1	Coronatine-insensitive protein 1	13	115
284668445587158	283556079864502	283503913879395	222945995330811	embryo development ending in seed dormancy [GO:0009793];formation of cytoplasmic translation initiation complex [GO:0001732];pollen germination [GO:0009846];response to sucrose [GO:0009744];translational initiation [GO:0006413]	cytoplasm [GO:0005737];cytosol [GO:0005829];eukaryotic 43S preinitiation complex [GO:0016282];eukaryotic 48S preinitiation complex [GO:0033290];eukaryotic translation initiation factor 3 complex, eIF3m [GO:0071541];Golgi apparatus [GO:0005794];nucleus [GO:0005634]	translation initiation factor activity [GO:0003743];translation initiation factor binding [GO:0031369]	18	0	323.31	175	9.6	9.6	9.6	18.1	11.9	15.7	9.6	9.6	O04202	O04202	1086	TIF3F1	Eukaryotic translation initiation factor 3 subunit F	39;41	99;103;196		117;145;234			93
241986541748047	NaN	243337440490723	241792678833008	clathrin coat assembly [GO:0048268];clathrin-dependent endocytosis [GO:0072583];intracellular protein transport [GO:0006886]	cell plate [GO:0009504];chloroplast envelope [GO:0009941];clathrin coat of coated pit [GO:0030132];clathrin coat of trans-Golgi network vesicle [GO:0030130];clathrin vesicle coat [GO:0030125];cytoskeleton [GO:0005856];Golgi apparatus [GO:0005794];phragmoplast [GO:0009524];plasma membrane [GO:0005886]	clathrin heavy chain binding [GO:0032050];identical protein binding [GO:0042802];structural molecule activity [GO:0005198]	17	0	61.75	61	5.4	0	6.6	7	0	3.1	0	2.7	O04209	O04209	1087	CLC2	Clathrin light chain 2	135	105;114;130;139;147;166;174;181;206;219
25910701751709	NaN	257469902038574	257987728118896	defense response [GO:0006952];NLS-bearing protein import into nucleus [GO:0006607]	cytosol [GO:0005829];host cell nucleus [GO:0042025];nucleus [GO:0005634]	nuclear import signal receptor activity [GO:0061608];nuclear localization sequence binding [GO:0008139]	23	0	80.634	66	17.7	9.6	13.4	13.4	11.9	15.4	19.2	11.1	O04294	O04294	1089	IMPA3	Importin subunit alpha-3	232;416;421;426	17;47;48
NaN	23418025970459	238172397613525	237829685211182	protein processing involved in protein targeting to mitochondrion [GO:0006627]	chloroplast [GO:0009507];chloroplast stroma [GO:0009570];cytosol [GO:0005829];mitochondrial inner membrane [GO:0005743];mitochondrial intermembrane space [GO:0005758];mitochondrial matrix [GO:0005759];mitochondrial outer membrane [GO:0005741];mitochondrial processing peptidase complex [GO:0017087];mitochondrial respiratory chain complex III [GO:0005750];mitochondrion [GO:0005739];plastid [GO:0009…	metal ion binding [GO:0046872];metalloendopeptidase activity [GO:0004222]	10	0	3.2331	1	3	9.4	9.6	9.4	3	0	0	3	O04308	O04308	1090	MPPalpha2	Probable mitochondrial-processing peptidase subunit alpha-2, chloroplastic/mitochondrial		125
311414489746094	311601467132568	311459484100342	312122230529785	response to cold [GO:0009409];response to jasmonic acid [GO:0009753];response to wounding [GO:0009611];vegetative to reproductive phase transition of meristem [GO:0010228]	chloroplast [GO:0009507];cytosol [GO:0005829];nucleus [GO:0005634];plasmodesma [GO:0009506];vacuole [GO:0005773]	carbohydrate binding [GO:0030246]	44	0	323.31	657	95.8	74.7	95.8	84.7	86.3	81.8	93.8	95.3	O04309	O04309	1091	JAL35	Jacalin-related lectin 35	339	3;4;26;27;46;49;57;98;101;103;158;180;200;203;211;237;330;344;349;352;361;362;400;402;405;423;424;427;451
279314002990723	285019931793213	282119674682617	289973621368408	response to cold [GO:0009409]	cytosol [GO:0005829];nucleus [GO:0005634];plasmodesma [GO:0009506]	carbohydrate binding [GO:0030246];copper ion binding [GO:0005507]	54	0	323.31	593	23.4	27.2	26.8	29.1	19.9	15	15.3	22.7	O04310	O04310	1092	JAL34	Jacalin-related lectin 34		10;12;46;92;292;297;302;309;373;396;408;429;430;444;448;506;518;523;527;562;584;603;676;677;681;695;705		384;387;449
231657485961914	NaN	248199214935303	219020175933838	response to cold [GO:0009409];response to zinc ion [GO:0010043]	nucleus [GO:0005634];plasmodesma [GO:0009506]	carbohydrate binding [GO:0030246]	40	0	323.31	407	10.3	2.3	2.3	14.7	0	4.3	2.3	13.7	O04311	O04311	1093	JAL33	Jacalin-related lectin 33		4;26;45;57;58;103;114;119;121;125;155;156;177;178;192;251;254;271;276;283		300			247;296
281206016540527	280360107421875	286877574920654	286052303314209		cytosol [GO:0005829]	carbohydrate binding [GO:0030246];copper ion binding [GO:0005507]	30	0	279.61	138	8.1	18.9	16.6	15.5	3.4	10.8	21.6	3	O04313	O04313	1094	PBP2	PYK10-binding protein 2		4;8;11;99;100;120;173;174;188;193;250;272;286		47			243
284080715179443	280683555603027	285878143310547	296239395141602	protein folding [GO:0006457];regulation of hydrolase activity [GO:0051336]	cytosol [GO:0005829];nucleus [GO:0005634];plasmodesma [GO:0009506]	carbohydrate binding [GO:0030246];copper ion binding [GO:0005507];enzyme regulator activity [GO:0030234]	44	0	323.31	759	46.3	53.4	54.4	64.4	47	50.7	60.7	43.3	O04314	O04314	1095	PBP1	PYK10-binding protein 1		4;11;46;59;99;100;118;120;121;175;176;190;195;249;252;269;274;288		47;71;132;134;298			245
315334777832031	316857872009277	31520658493042	316103897094727	glucosinolate catabolic process [GO:0019762];nitrile biosynthetic process [GO:0080028]	cytosol [GO:0005829];nucleus [GO:0005634];plasmodesma [GO:0009506]	carbohydrate binding [GO:0030246];enzyme regulator activity [GO:0030234]	68	0	323.31	981	36.2	39.1	36.8	39.9	26.2	31.8	33.8	29.9	O04316	O04316	1096	NSP4	Nitrile-specifier protein 4	316;458;489	4;46;96;99;100;120;153;157;175;206;207;232;252;271;301;304;326;342;406;453;454;568;592;593;601		11;14;35;47;194;234;308;337;393;403;443;487;605	458		423;538;597
2857546043396	291724796295166	28509147644043	299973888397217	glucosinolate catabolic process [GO:0019762];nitrile biosynthetic process [GO:0080028]	chloroplast [GO:0009507];cytosol [GO:0005829];nucleus [GO:0005634]	carbohydrate binding [GO:0030246];enzyme regulator activity [GO:0030234]	31	0	277.51	125	14.3	15	12	12	12	12	12	12	O04318	O04318	1097	NSP3	Nitrile-specifier protein 3	167;219;309	103;110;122;257;294;364;419;440;449		159;244;254	167
28783504486084	291716690063477	289234313964844	290811882019043	auxin metabolic process [GO:0009850];response to wounding [GO:0009611]	endoplasmic reticulum [GO:0005783];endoplasmic reticulum lumen [GO:0005788];nucleus [GO:0005634];plasma membrane [GO:0005886]	hydrolase activity [GO:0016787];IAA-Ala conjugate hydrolase activity [GO:0010179];metal ion binding [GO:0046872]	28	0	312.95	277	35.2	36.4	36.6	26.4	35.2	28.6	34.3	37.5	O04373	O04373	1098	ILL4	IAA-amino acid hydrolase ILR1-like 4		40;70;78;124;126;219;295;301;302;427					393
268461322784424	267013397216797	26947151184082	266013031005859	brassinosteroid mediated signaling pathway [GO:0009742];megasporogenesis [GO:0009554];meiotic sister chromatid cohesion [GO:0051177];microsporogenesis [GO:0009556];protein dephosphorylation [GO:0006470];regulation of protein autophosphorylation [GO:0031952]	cytoplasm [GO:0005737];cytosol [GO:0005829];nucleus [GO:0005634];protein phosphatase type 2A complex [GO:0000159]	protein phosphatase activator activity [GO:0072542]	11	0	11.399	56	12.2	9.6	10.2	5.8	9.6	11.2	11	13.6	O04376	O04376	1099	B'BETA	Serine/threonine protein phosphatase 2A 57 kDa regulatory subunit B' beta isoform		248
291013431549072	293988075256348	293073463439941	293658008575439	adaxial/abaxial pattern specification [GO:0009955];adventitious root development [GO:0048830];auxin metabolic process [GO:0009850];cell differentiation [GO:0030154];defense response to virus [GO:0051607];gene silencing by miRNA [GO:0035195];innate immune response [GO:0045087];leaf morphogenesis [GO:0009965];leaf proximal/distal pattern formation [GO:0010589];leaf vascular tissue pattern formation…	cytoplasm [GO:0005737];cytosol [GO:0005829];nucleus [GO:0005634]	endoribonuclease activity [GO:0004521];metal ion binding [GO:0046872];miRNA binding [GO:0035198];mRNA binding [GO:0003729]	37	0	111.99	279	20.5	19.4	26.3	21.6	25.2	27.5	26.2	21.1	O04379	O04379	1100	2001-08-01	Protein argonaute 1	794	206;230;292;348;530;667
282788352966309	284518337249756	283424015045166	285190086364746	peroxisome organization [GO:0007031];purine nucleobase metabolic process [GO:0006144];urate catabolic process [GO:0019628]	cytosol [GO:0005829];peroxisome [GO:0005777]	urate oxidase activity [GO:0004846]	29	0	211.36	266	40.5	41.7	40.8	48.5	49.2	53.4	55.7	51.5	O04420	O04420	1101	At2g26230	Uricase	77	75;121;142;159;172;205;212;261;275;282;284
303096466064453	303118133544922	303889503479004	303629608154297	protein folding [GO:0006457]	chaperonin-containing T-complex [GO:0005832];cytosol [GO:0005829];nucleus [GO:0005634];plasma membrane [GO:0005886];plasmodesma [GO:0009506]	ATP binding [GO:0005524];unfolded protein binding [GO:0051082]	60	0	323.31	473	51.2	39.3	41.9	40.7	44.7	30.5	40.6	32.1	O04450	O04450	1103	CCT5	T-complex protein 1 subunit epsilon	165;288;298;373;403;425;489	31;38;55;187;206;210;214;228;259;261;269;275;287;348;351;358;364;388;395;435;479;525					87;135;389;456
267411117553711	263980007171631	267177734375	269131927490234	protein deubiquitination [GO:0016579];shoot system morphogenesis [GO:0010016];ubiquitin-dependent protein catabolic process [GO:0006511]	cytoplasm [GO:0005737];nucleus [GO:0005634]	thiol-dependent ubiquitin-specific protease activity [GO:0004843]	12	0	16.07	80	14.2	10	17.6	18.2	10	12.7	10	14.8	O04482	O04482	1104	UCH2	Ubiquitin carboxyl-terminal hydrolase 2	249	222;225
326569557189941	32420337677002	32553092956543	325713157653809		cytosol [GO:0005829];extracellular region [GO:0005576];plasma membrane [GO:0005886];plasmodesma [GO:0009506];vacuole [GO:0005773]	translation elongation factor activity [GO:0003746]	55	0	323.31	880	68.4	64.5	68.6	68.6	68.6	68.6	68.4	68.6	O04487	O04487	1106	At1g09640	Probable elongation factor 1-gamma 1	343;412	9;12;47;53;135;178;201;207;218;219;225;227;231;232;233;242;251;253;255;272;279;321;334;339;352;389;411;414		68			48;117;120;266;313;340;367;373;395
NaN	24421817779541	240703830718994	241536769866943	leaf proximal/distal pattern formation [GO:0010589];leaf vascular tissue pattern formation [GO:0010305];mRNA cleavage involved in gene silencing by miRNA [GO:0035279];pre-miRNA processing [GO:0031054];primary miRNA processing [GO:0031053];production of miRNAs involved in gene silencing by miRNA [GO:0035196];production of siRNA involved in RNA interference [GO:0030422];production of ta-siRNAs invo…	nuclear dicing body [GO:0010445];nuclear speck [GO:0016607];nucleus [GO:0005634]	double-stranded RNA binding [GO:0003725];identical protein binding [GO:0042802];miRNA binding [GO:0035198];ribonuclease III activity [GO:0004525]	2	0	5.1712	10	0	16	16	16	0	2.9	13.1	16	O04492	O04492	1107	DRB1	Double-stranded RNA-binding protein 1
334161415100098	335047416687012	334762916564941	336315765380859	protein catabolic process [GO:0030163];proteolysis [GO:0006508];regulation of programmed cell death [GO:0043067];systemic acquired resistance [GO:0009627]	apoplast [GO:0048046];cell wall [GO:0005618];secretory vesicle [GO:0099503]	aspartic-type endopeptidase activity [GO:0004190];nucleotide binding [GO:0000166]	20	0	323.31	481	38.8	33.2	38.8	38.8	36.3	30.7	30.7	30.7	O04496	O04496	1108	AED3	Aspartyl protease AED3	405;448	87;269;277;388		97;103;414;416;438			382;391;408
343483657836914	342006225585938	343204612731934	343185768127441	cellular carbohydrate metabolic process [GO:0044262];glucose catabolic process [GO:0006007];glycolytic process [GO:0006096];pollen development [GO:0009555];response to cadmium ion [GO:0046686];response to cold [GO:0009409];stomatal movement [GO:0010118]	chloroplast [GO:0009507];cytosol [GO:0005829];extracellular region [GO:0005576];mitochondrial envelope [GO:0005740];plasma membrane [GO:0005886];plasmodesma [GO:0009506]	2,3-bisphosphoglycerate-independent phosphoglycerate mutase activity [GO:0046537];manganese ion binding [GO:0030145]	86	0	323.31	2488	94.6	97.7	97.7	98	97.5	97.5	97.5	94.6	O04499	O04499	1109	PGM1	2,3-bisphosphoglycerate-independent phosphoglycerate mutase 1	39;100;355;444	8;14;17;19;63;98;108;116;150;221;235;237;244;248;294;303;325;379;399;401;408;417;462;479;482;485;490;493;503		79;85;193;215;253;348;369;371;395;427;473			48;77;206;289;291;317;400;430;453;477
26117712020874	261957664489746	261879558563232	259951152801514		cytosol [GO:0005829]		12	0	37.106	64	16.6	9.4	14	10.4	31.5	26.6	36.7	36.7	O04551	O04551	1111	At1g27020	Plant/protein	280	52;145
282353496551514	285447692871094	28363525390625	2834206199646		Golgi apparatus [GO:0005794];integral component of membrane [GO:0016021]	O-acetyltransferase activity [GO:0016413]	12	0	61.226	65	21.9	27.8	25.8	24	21.5	14.7	19.5	19.2	O04621	O04621	1113	TBL26	Protein trichome birefringence-like 26	121;177;271;274	337
308989391326904	310905570983887	308295650482178	309348754882813	threonyl-tRNA aminoacylation [GO:0006435];tRNA aminoacylation for protein translation [GO:0006418]	cell wall [GO:0005618];chloroplast [GO:0009507];cytosol [GO:0005829];mitochondrion [GO:0005739];plasma membrane [GO:0005886];plastid [GO:0009536]	aminoacyl-tRNA ligase activity [GO:0004812];ATP binding [GO:0005524];metal ion binding [GO:0046872];threonine-tRNA ligase activity [GO:0004829]	82	0	323.31	813	67.7	51.1	54.9	71.5	69.1	65.2	67.8	62.1	O04630	O04630	1114	THRRS	Threonine--tRNA ligase, mitochondrial 1	129;163;166;170;248;255;271;407;411;461;552;618	51;54;68;76;85;135;205;217;267;270;280;300;303;304;313;355;403;491;498;508;514;522;537;549;576;577;605;623;630;633;636;692;702		235			121;241;546
271495742797852	273771629333496	274083557128906	272675838470459	negative regulation of defense response to virus [GO:0050687];response to virus [GO:0009615]	cytoplasm [GO:0005737];cytosol [GO:0005829];eukaryotic translation initiation factor 4F complex [GO:0016281];mRNA cap binding complex [GO:0005845];nucleus [GO:0005634];plastid [GO:0009536]	RNA 7-methylguanosine cap binding [GO:0000340];translation initiation factor activity [GO:0003743]	13	0	30.516	83	42.4	31.3	37.4	33.3	38.9	41.9	42.9	31.8	O04663	O04663	1116	EIF(ISO)4E	Eukaryotic translation initiation factor isoform 4E		31;41;52;160;174
284865016937256	279182071685791	282038726806641	287462463378906	one-carbon metabolic process [GO:0006730]	chloroplast stroma [GO:0009570];endoplasmic reticulum [GO:0005783]	carbonate dehydratase activity [GO:0004089];hydro-lyase activity [GO:0016836];zinc ion binding [GO:0008270]	9	0	18.158	50	16.2	19	20.4	22.5	14.1	15.1	19	14.8	O04846	O04846	1118	ACA1	Alpha carbonic anhydrase 1, chloroplastic	216	233
301128444671631	300689449310303	302058296203613	3017307472229	'de novo' pyrimidine nucleobase biosynthetic process [GO:0006207];'de novo' UMP biosynthetic process [GO:0044205];pyrimidine nucleotide biosynthetic process [GO:0006221]	chloroplast [GO:0009507];cytoplasm [GO:0005737];cytosol [GO:0005829];mitochondrion [GO:0005739]	dihydroorotase activity [GO:0004151];metal ion binding [GO:0046872]	24	0	206.8	300	61.8	45.4	64.7	60.5	66	67.4	61.8	61.8	O04904	O04904	1119	PYR4	Dihydroorotase, mitochondrial	219;251;293;295	65;220;266;273;274		328
291380939483643	288549556732178	291327362060547	28980655670166	CDP biosynthetic process [GO:0046705];'de novo' pyrimidine nucleobase biosynthetic process [GO:0006207];purine nucleotide metabolic process [GO:0006163];pyrimidine nucleotide biosynthetic process [GO:0006221];pyrimidine ribonucleoside monophosphate metabolic process [GO:0009173];UDP biosynthetic process [GO:0006225]	cytoplasm [GO:0005737];cytosol [GO:0005829];nucleus [GO:0005634];plastid [GO:0009536]	ATP binding [GO:0005524];cytidylate kinase activity [GO:0004127];UMP kinase activity [GO:0033862];uridylate kinase activity [GO:0009041]	25	0	129.22	243	51	57.4	61.9	45	56.9	47.5	40.6	58.9	O04905	O04905	1120	UMK3	UMP-CMP kinase 3	31;125	13;54;71;80;84;93;111;132;154;180;199		59
290258312225342	292026348114014	289041748046875	289330043792725	response to oxidative stress [GO:0006979]	cytosol [GO:0005829];nucleus [GO:0005634];peroxisome [GO:0005777];plasma membrane [GO:0005886]	glutathione peroxidase activity [GO:0004602];peroxidase activity [GO:0004601]	31	0	229.77	265	65.1	60.4	66.3	52.7	66.9	79.9	78.1	55	O04922	O04922	1121	GPX2	Probable glutathione peroxidase 2	41;70;89	7;15;28;30;40;49;57;59;93;101;107;114;117;120;129;134;142;158		105
323318328857422	321863327026367	322352333068848	321695861816406	fatty acid biosynthetic process [GO:0006633];malonyl-CoA biosynthetic process [GO:2001295]	chloroplast [GO:0009507]	acetyl-CoA carboxylase activity [GO:0003989];ATP binding [GO:0005524];biotin carboxylase activity [GO:0004075];metal ion binding [GO:0046872]	53	0	323.31	991	72.6	71.1	67.2	72.3	72.6	70.8	70	71.1	O04983	O04983	1123	CAC2	Biotin carboxylase, chloroplastic	100;147;167;269;301	109;196;230;244;251;257;273;289;309;325;392;396;418;495;504;507;515;530		197			96;195;228;327;359;374;440
336594886779785	334521865844727	336626739501953	336835327148438		anchored component of membrane [GO:0031225];anchored component of plasma membrane [GO:0046658];apoplast [GO:0048046];cytosol [GO:0005829];plasma membrane [GO:0005886];secretory vesicle [GO:0099503]		33	0	323.31	811	50	49.5	50.2	49.5	50.2	49.5	50.2	49.5	O22126	O22126	1125	FLA8	Fasciclin-like arabinogalactan protein 8		76;83;99;102;136;147;154;157;213;221;234;243;262;264;271;284;334		55;66;67;272;273;280			70
297195529937744	298715152740479	296495189666748	298440685272217	cell wall modification [GO:0042545];defense response to Gram-negative bacterium [GO:0050829];pectin catabolic process [GO:0045490];response to bacterium [GO:0009617];response to fungus [GO:0009620]	cell wall [GO:0005618];extracellular region [GO:0005576]	aspartyl esterase activity [GO:0045330];pectinesterase activity [GO:0030599];pectinesterase inhibitor activity [GO:0046910]	26	0	323.31	183	22.1	26.2	26.8	28.6	10	6.8	9.2	9.8	O22149	O22149	1127	PME17	Probable pectinesterase/pectinesterase inhibitor 17	34;43;100;140	94;211;218;262;374;430		376;396
309194011688232	29216739654541	308160438537598	302897796630859		chloroplast [GO:0009507];chloroplast thylakoid [GO:0009534];chloroplast thylakoid lumen [GO:0009543];chloroplast thylakoid membrane [GO:0009535];cytosol [GO:0005829];thylakoid [GO:0009579];thylakoid lumen [GO:0031977]		14	0	323.31	209	54.5	54.5	54.5	55.8	59.4	59.4	59.4	59.4	O22160	O22160	1128	At2g44920	Thylakoid lumenal 15 kDa protein 1, chloroplastic	203	101;114;127;160;180;204		215
323302040100098	324155349731445	323877182006836	323542366027832	regulation of translation [GO:0006417];response to cadmium ion [GO:0046686];viral process [GO:0016032]	cytoplasm [GO:0005737];cytosol [GO:0005829];nucleus [GO:0005634];ribonucleoprotein complex [GO:1990904];vacuole [GO:0005773]	mRNA 3'-UTR binding [GO:0003730];mRNA binding [GO:0003729];poly(A) binding [GO:0008143];poly(U) RNA binding [GO:0008266];RNA binding [GO:0003723]	65	0	323.31	939	49.8	53.6	50.3	50.3	45.6	47.3	49.4	43.5	O22173	O22173	1129	PAB4	Polyadenylate-binding protein 4	157;163;266;357	102;106;115;139;143;148;164;188;193;197;202;221;223;230;242;288;289;293;299;302;324;333;343;358;368;391;396;645		108;113;195;200;286;386;389			170;257;600;604
256101760864258	260222949981689	256402530670166	257780361175537	protein autophosphorylation [GO:0046777]	integral component of membrane [GO:0016021];plasma membrane [GO:0005886];plasmodesma [GO:0009506];vacuole [GO:0005773]	ATP binding [GO:0005524];protein kinase activity [GO:0004672];protein serine/threonine kinase activity [GO:0004674]	5	0.00057176	2.6999	37	3.4	4.6	4.6	4.6	3.4	4.6	5.6	2.5	O22187	O22187	1130	At2g23200	Probable receptor-like protein kinase At2g23200
257834167480469	258474712371826	255514221191406	260642681121826	coumarin biosynthetic process [GO:0009805];flavonoid biosynthetic process [GO:0009813];lignin biosynthetic process [GO:0009809];phenylpropanoid biosynthetic process [GO:0009699]	cytosol [GO:0005829];endoplasmic reticulum [GO:0005783];integral component of membrane [GO:0016021];intracellular membrane-bounded organelle [GO:0043231];membrane [GO:0016020];mitochondrion [GO:0005739];plasma membrane [GO:0005886]	heme binding [GO:0020037];identical protein binding [GO:0042802];iron ion binding [GO:0005506];monooxygenase activity [GO:0004497];oxidoreductase activity, acting on paired donors, with incorporation or reduction of molecular oxygen, NAD(P)H as one donor, and incorporation of one atom of oxygen [GO:0016709];p-coumarate 3-hydroxylase activity [GO:0046409]	7	0	7.6626	40	3	3	3	1.4	3	3	3	3	O22203	O22203	1131	CYP98A3	Cytochrome P450 98A3	158
214829616546631	213482456207275	216685638427734	NaN	cell fate determination [GO:0001709];cell-cell signaling [GO:0007267];embryo sac development [GO:0009553];embryo sac egg cell differentiation [GO:0009560];mRNA splicing, via spliceosome [GO:0000398]	nuclear speck [GO:0016607];spliceosomal complex [GO:0005681];U4/U6 x U5 tri-snRNP complex [GO:0046540]	U4 snRNA binding [GO:0030621];U6 snRNA binding [GO:0017070]	12	0	22.902	34	2.5	2.5	2.5	0	2.5	5.2	5.2	2.5	O22212	O22212	1133	LIS	U4/U6 small nuclear ribonucleoprotein PRP4-like protein	273;312	124;207
325327835083008	322251281738281	325555191040039	32416015625	cell redox homeostasis [GO:0045454];hydrogen peroxide catabolic process [GO:0042744];positive regulation of catalytic activity [GO:0043085];regulation of chlorophyll biosynthetic process [GO:0010380];regulation of starch biosynthetic process [GO:0010581];removal of superoxide radicals [GO:0019430]	chloroplast [GO:0009507];chloroplast stroma [GO:0009570];cytosol [GO:0005829]	enzyme activator activity [GO:0008047];identical protein binding [GO:0042802];oxidoreductase activity, acting on a sulfur group of donors, disulfide as acceptor [GO:0016671];thioredoxin-disulfide reductase activity [GO:0004791]	33	0	323.31	459	48.4	43.3	49.3	49.3	48.4	48.4	49.3	43.7	O22229	O22229	1136	NTRC	NADPH-dependent thioredoxin reductase 3	187;217;220;381;454;457	184;186;250;296;409;410;420;427;436;461;516;518		353;394;395			299
264937191009521	267813167572021	NaN	267504711151123	defense response [GO:0006952];L-phenylalanine biosynthetic process [GO:0009094];response to karrikin [GO:0080167]	chloroplast [GO:0009507];chloroplast stroma [GO:0009570];cytoplasm [GO:0005737]	arogenate dehydratase activity [GO:0047769];prephenate dehydratase activity [GO:0004664]	14	0	160.12	39	8	8	6.6	8	12	9.2	9.9	4.5	O22241	O22241	1137	ADT4	Arogenate dehydratase 4, chloroplastic		315
320238647460938	320403213500977	319988346099854	320021591186523	cell redox homeostasis [GO:0045454];double fertilization forming a zygote and endosperm [GO:0009567];embryo development ending in seed dormancy [GO:0009793];embryo sac development [GO:0009553];pollen tube development [GO:0048868];response to cadmium ion [GO:0046686];response to endoplasmic reticulum stress [GO:0034976]	cytosol [GO:0005829];endoplasmic reticulum [GO:0005783];plant-type cell wall [GO:0009505];secretory vesicle [GO:0099503];vacuolar membrane [GO:0005774]	protein disulfide isomerase activity [GO:0003756]	57	0	323.31	829	80.6	76.7	85.9	83.7	85.3	82.8	85.6	86.1	O22263	O22263	1138	PDIL2-1	Protein disulfide-isomerase like 2-1	52;55;82;89;171;174	41;57;64;70;71;73;79;86;91;112;128;135;183;189;205;210;220;248;256;262;274;284;285;299;307;311;314;319;326;337;343;350		198
288524284362793	294587326049805	286530094146729	28812744140625	protein heterotrimerization [GO:0070208];protein import into chloroplast thylakoid membrane [GO:0045038];response to high light intensity [GO:0009644]	chloroplast [GO:0009507];chloroplast envelope [GO:0009941];chloroplast stroma [GO:0009570];chloroplast thylakoid membrane [GO:0009535];cytosol [GO:0005829];protein-containing complex [GO:0032991];signal recognition particle, chloroplast targeting [GO:0080085];signal recognition particle, endoplasmic reticulum targeting [GO:0005786]	disordered domain specific binding [GO:0097718];identical protein binding [GO:0042802];metal ion binding [GO:0046872];protein domain specific binding [GO:0019904];protein-macromolecule adaptor activity [GO:0030674]	12	0	27.03	89	25.2	19.3	15	24.7	18	15.5	22	25.7	O22265	O22265	1139	CAO	Signal recognition particle 43 kDa protein, chloroplastic		138;239;283;328
291823177337646	291340847015381	290218391418457	290756912231445	cellulose biosynthetic process [GO:0030244];defense response to bacterium [GO:0042742];GDP-mannose biosynthetic process [GO:0009298];L-ascorbic acid biosynthetic process [GO:0019853];response to ammonium ion [GO:0060359];response to heat [GO:0009408];response to jasmonic acid [GO:0009753];response to ozone [GO:0010193];response to salt stress [GO:0009651]	cytosol [GO:0005829];nucleus [GO:0005634]	GTP binding [GO:0005525];mannose-1-phosphate guanylyltransferase activity [GO:0004475]	34	0	179.85	336	30.2	32.1	32.4	42.7	44	46.8	45.2	37.1	O22287	O22287	1141	CYT1	Mannose-1-phosphate guanylyltransferase 1	77;267;279;303	2;31;70;126;138;144;159;163;165;186;196;244;300;351;356					33
248550033569336	236865634918213	250320835113525	258259735107422	mRNA cis splicing, via spliceosome [GO:0045292];regulation of alternative mRNA splicing, via spliceosome [GO:0000381]	interchromatin granule [GO:0035061];nuclear speck [GO:0016607];nucleus [GO:0005634];spliceosomal complex [GO:0005681]	mRNA binding [GO:0003729];RNA binding [GO:0003723]	18	0	45.224	77	3	4	6.9	5.6	2.6	3	0	3	O22315	O22315	1142	SR34	Serine/arginine-rich-splicing factor SR34	146;165	136;141;170		187
NaN	255408802032471	NaN	251851425170898	DNA mediated transformation [GO:0009294];histone acetylation [GO:0016573];histone H3 deacetylation [GO:0070932];histone H4 deacetylation [GO:0070933];jasmonic acid and ethylene-dependent systemic resistance [GO:0009861];negative regulation of transcription, DNA-templated [GO:0045892];pathogenesis [GO:0009405];positive regulation of stem cell population maintenance [GO:1902459];positive regulation…	histone deacetylase complex [GO:0000118];nucleus [GO:0005634];Sin3-type complex [GO:0070822]	histone deacetylase activity [GO:0004407];NAD-dependent histone deacetylase activity (H3-K14 specific) [GO:0032041]	7	0	35.266	41	0	4.6	0	4.6	0	0	2.4	0	O22446	O22446	1143	HDA19	Histone deacetylase 19	269;456
268981609344482	271903705596924	271143608093262	274272632598877	DNA replication [GO:0006260];embryo development ending in seed dormancy [GO:0009793];flower development [GO:0009908];heterochromatin assembly [GO:0031507];heterochromatin organization [GO:0070828];leaf development [GO:0048366];multicellular organism development [GO:0007275];pollen development [GO:0009555];positive regulation of cell cycle [GO:0045787];regulation of flower development [GO:0009909]…	chromatin silencing complex [GO:0005677];Cul4-RING E3 ubiquitin ligase complex [GO:0080008];nucleus [GO:0005634]		16	0	39.428	103	23.6	17.2	25.5	30	28.5	16.3	19.3	7.8	O22467	O22467	1144	MSI1	Histone-binding protein MSI1		3;22;299;305
271532516479492	269175243377686	26761417388916	269953956604004	chromatin organization [GO:0006325]	Cul4-RING E3 ubiquitin ligase complex [GO:0080008];cytosol [GO:0005829];nucleus [GO:0005634]		14	0	41.851	138	19.8	20.5	12.3	15.2	23.4	21.9	25.1	23.9	O22468	O22468	1145	MSI2	WD-40 repeat-containing protein MSI2	124;139;158;194	128;152;257
276395492553711	281609153747559	278413410186768	283110771179199	anther wall tapetum cell differentiation [GO:0048657];brassinosteroid homeostasis [GO:0010268];brassinosteroid mediated signaling pathway [GO:0009742];detection of brassinosteroid stimulus [GO:0009729];hormone-mediated signaling pathway [GO:0009755];leaf development [GO:0048366];microtubule bundle formation [GO:0001578];negative regulation of cell death [GO:0060548];pollen exine formation [GO:001…	endosome [GO:0005768];endosome membrane [GO:0010008];integral component of membrane [GO:0016021];plasma membrane [GO:0005886]	ATP binding [GO:0005524];identical protein binding [GO:0042802];protein heterodimerization activity [GO:0046982];protein homodimerization activity [GO:0042803];protein kinase activity [GO:0004672];protein serine/threonine kinase activity [GO:0004674];steroid binding [GO:0005496];transmembrane receptor protein tyrosine kinase activity [GO:0004714]	4	0.0018549	2.2324	21	2.5	2.4	2.5	2.5	1.9	3	1.8	2.5	O22476	O22476	1147	BRI1	Protein BRASSINOSTEROID INSENSITIVE 1		713
255313930511475	243710594177246	254225234985352	2609450340271	chloroplast organization [GO:0009658]	cytosol [GO:0005829]	ATP binding [GO:0005524];protein kinase activity [GO:0004672];protein serine/threonine kinase activity [GO:0004674];protein serine/threonine/tyrosine kinase activity [GO:0004712]	17	0	34.219	87	5.5	3.7	5.5	9.7	13.2	8.1	5.5	13.2	O22558	O22558	1148	STY8	Serine/threonine-protein kinase STY8	306;357	30;89		45
313362846374512	310705432891846	31350528717041	314215679168701	cell differentiation [GO:0030154];chromatin organization [GO:0006325];DNA repair [GO:0006281];flower development [GO:0009908];response to UV-B [GO:0010224]	Cul4-RING E3 ubiquitin ligase complex [GO:0080008];cytoplasm [GO:0005737];cytosol [GO:0005829];mitochondrion [GO:0005739];nucleolus [GO:0005730];nucleus [GO:0005634]	metal ion binding [GO:0046872]	41	0	323.31	650	47.5	59.6	46.2	61.1	54.2	57.4	60.7	65.3	O22607	O22607	1149	MSI4	WD-40 repeat-containing protein MSI4	130;229;309;316;391;464;503	33;35;50;56;57;67;106;134;156;157;159;178;261;268;276;331;369;421;422;428;495;497;506		373			478
283640270233154	274788494110107	281545562744141	284303779602051	photosystem II repair [GO:0010206];protein catabolic process [GO:0030163]	chloroplast [GO:0009507];chloroplast thylakoid [GO:0009534];chloroplast thylakoid membrane [GO:0009535];cytosol [GO:0005829];nucleus [GO:0005634];thylakoid [GO:0009579];thylakoid lumen [GO:0031977]	identical protein binding [GO:0042802];serine-type endopeptidase activity [GO:0004252];serine-type peptidase activity [GO:0008236]	16	0	57.619	110	26.2	27.8	31.7	38.5	45.3	38.5	45.3	45.3	O22609	O22609	1150	DEGP1	Protease Do-like 1, chloroplastic		113;215;331;427		392;398
280225811004639	281732177734375	282300891876221	280173854827881	cysteine biosynthetic process from serine [GO:0006535];photosynthesis [GO:0015979];photosynthetic acclimation [GO:0009643];regulation of hydrogen peroxide metabolic process [GO:0010310];regulation of superoxide metabolic process [GO:0090322]	chloroplast [GO:0009507];chloroplast thylakoid lumen [GO:0009543];cytoplasm [GO:0005737];thylakoid lumen [GO:0031977]	cysteine synthase activity [GO:0004124];pyridoxal phosphate binding [GO:0030170]	12	0	45.156	90	28	25.5	25.2	28.5	22	20.3	18.6	20.3	O22682	O22682	1151	CS26	S-sulfo-L-cysteine synthase (O-acetyl-L-serine-dependent), chloroplastic	122;136	295
304160900115967	303389434814453	304432220458984	302738647460938	cyanate catabolic process [GO:0009440];response to salt stress [GO:0009651]	cytosol [GO:0005829]	cyanate hydratase activity [GO:0008824];DNA binding [GO:0003677];identical protein binding [GO:0042802]	14	0	282.35	204	70.2	66.7	54.8	58.3	63.7	70.2	67.3	51.8	O22683	O22683	1152	CYN	Cyanate hydratase		5;6;17;22;49;144					97
269584789276123	266103439331055	262164707183838	267310447692871		chloroplast envelope [GO:0009941];plasma membrane [GO:0005886]	oxidoreductase activity [GO:0016491]	18	0	28.035	34	32.2	29.6	28.1	26.7	26.4	33	30.1	30.4	O22707	O22707	1153	At1g60690	Probable aldo-keto reductase 3	112;123;198	83;117;146;147;155					142
248053321838379	249756565093994	249667091369629	247828178405762		mitochondrion [GO:0005739]		11	0	9.2641	22	1.8	1.8	1.8	1.8	1.8	3.5	1.8	0	O22714	O22714	1154	At1g60770	Pentatricopeptide repeat-containing protein At1g60770		460
252588958740234	254104442596436	257532787322998	259826583862305	intracellular protein transport [GO:0006886];vesicle-mediated transport [GO:0016192]	clathrin adaptor complex [GO:0030131];clathrin-coated vesicle membrane [GO:0030665];cytoplasmic vesicle [GO:0031410];cytosol [GO:0005829];early endosome membrane [GO:0031901];Golgi apparatus [GO:0005794];intracellular membrane-bounded organelle [GO:0043231];nucleus [GO:0005634]		28	0	186.95	174	3.3	4.2	5.1	6.1	6.1	6.1	6.1	3.3	O22715;Q9SAC9	O22715	1155	AP1M2	AP-1 complex subunit mu-2	212	38;139;277;299;341;347;384;401
242513313293457	NaN	NaN	250888557434082	acetyl-CoA biosynthetic process [GO:0006085];lipid metabolic process [GO:0006629]	citrate lyase complex [GO:0009346];cytosol [GO:0005829]	ATP binding [GO:0005524];ATP citrate synthase activity [GO:0003878]	32	0	99.7	59	32.6	26.5	22.5	30	30.5	24.8	26.5	25.5	O22718	O22718	1156	ACLA-2	ATP-citrate synthase alpha chain protein 2	98;323;412	16;20;54;58;65;91;225;229;262;269;331;383;387					61;95;243
26521183013916	26688325881958	260082550048828	263488464355469	auxin biosynthetic process [GO:0009851];tryptophan biosynthetic process [GO:0000162]	chloroplast [GO:0009507];cytoplasm [GO:0005737];cytosol [GO:0005829]	indole-3-glycerol-phosphate lyase activity [GO:0033984];tryptophan synthase activity [GO:0004834]	8	0	19.509	31	19.6	35.3	34.9	26.2	36.4	30.2	31.6	29.8	O22765	O22765	1157	TRPA1	Tryptophan synthase alpha chain		224
268592281341553	266289539337158	271153526306152	265253105163574	mitochondrial electron transport, NADH to ubiquinone [GO:0006120];respiratory electron transport chain [GO:0022904];response to oxidative stress [GO:0006979]	cytosol [GO:0005829];mitochondrial respiratory chain complex I [GO:0005747];mitochondrion [GO:0005739]	2 iron, 2 sulfur cluster binding [GO:0051537];NADH dehydrogenase (ubiquinone) activity [GO:0008137];zinc ion binding [GO:0008270]	9	0	34.92	94	12.2	12.5	15.7	11	16.9	16.9	12.2	11.8	O22769	O22769	1159	At4g02580	NADH dehydrogenase [ubiquinone] flavoprotein 2, mitochondrial		154;212;245
260400714874268	258335456848145	260003890991211	258928909301758	photosystem II repair [GO:0010206]	chloroplast [GO:0009507];chloroplast envelope [GO:0009941];chloroplast stroma [GO:0009570];chloroplast thylakoid [GO:0009534];chloroplast thylakoid lumen [GO:0009543];chloroplast thylakoid membrane [GO:0009535];cytosol [GO:0005829];thylakoid [GO:0009579];thylakoid lumen [GO:0031977]		3	0	17.897	27	11.1	11.1	19.9	19.9	19.9	19.9	19.9	19.9	O22773	O22773	1160	At4g02530	Thylakoid lumenal 16.5 kDa protein, chloroplastic
242699222564697	250496788024902	243516464233398	240126533508301	plasmodesmata-mediated intercellular transport [GO:0010497];transport of virus in multicellular host [GO:0046739]	integral component of membrane [GO:0016021];plasma membrane [GO:0005886];plasmodesma [GO:0009506]		2	0	15.287	5	8.2	3.6	8.2	8.2	4.6	4.6	4.6	4.6	O22784	O22784	1161	PDLP3	Plasmodesmata-located protein 3	101;104
296717872619629	292509479522705	294466381072998	293757553100586	defense response to bacterium [GO:0042742];DNA repair [GO:0006281];generation of catalytic spliceosome for first transesterification step [GO:0000349];innate immune response [GO:0045087];protein K63-linked ubiquitination [GO:0070534]	catalytic step 2 spliceosome [GO:0071013];cell wall [GO:0005618];Cul4-RING E3 ubiquitin ligase complex [GO:0080008];endoplasmic reticulum [GO:0005783];nucleus [GO:0005634];Prp19 complex [GO:0000974];U2-type catalytic step 1 spliceosome [GO:0071006]	ubiquitin protein ligase activity [GO:0061630];ubiquitin-protein transferase activity [GO:0004842]	30	0	323.31	292	32.6	35.2	45.7	35.6	33.5	33	38.1	31.4	O22785	O22785	1162	PRP19B	Pre-mRNA-processing factor 19 homolog 2	3;38;112;169;183;226;301	153;166;167;190;266;383;514		151
24311882019043	253427906036377	254031143188477	257876834869385	regulation of RNA metabolic process [GO:0051252]	endoplasmic reticulum [GO:0005783];nucleus [GO:0005634];ribonucleoprotein complex [GO:1990904]	mRNA binding [GO:0003729];RNA binding [GO:0003723]	11	0	68.336	67	5	5.9	5	8.7	5	5	2.2	5	O22791	O22791	1163	At2g33410	Putative RNA-binding protein		67;178;183
242445240020752	244754981994629	242581062316895	247222881317139	cytidine to uridine editing [GO:0016554];endonucleolytic cleavage of tetracistronic rRNA transcript (SSU-rRNA, LSU-rRNA, 4.5S-rRNA, 5S-rRNA) [GO:0002103];mitochondrial mRNA modification [GO:0080156];mRNA processing [GO:0006397];plastid organization [GO:0009657]	chloroplast [GO:0009507];endoplasmic reticulum [GO:0005783];mitochondrion [GO:0005739]	protein dimerization activity [GO:0046983];protein homodimerization activity [GO:0042803]	4	0	13.939	10	15.5	15.5	15.5	15.5	11	8.7	15.5	15.5	O22793	O22793	1164	MORF2	Multiple organellar RNA editing factor 2, chloroplastic	131;139	123;124
266793594360352	264808521270752	266537609100342	268435001373291	ceramide transport [GO:0035627];intermembrane lipid transfer [GO:0120009]	cytosol [GO:0005829];membrane [GO:0016020];plasma membrane [GO:0005886]	ceramide 1-phosphate binding [GO:1902387];ceramide 1-phosphate transfer activity [GO:1902388];lipid binding [GO:0008289]	17	0	76.951	93	35.1	22.3	34.7	36.1	22.3	32.7	36.1	30.7	O22797	O22797	1165	GLTP1	Glycolipid transfer protein 1	9;32;93;177	14;17;33;50;62;70;88					13;46;104;199
298077163696289	295395469665527	297979354858398	298199462890625	cellular response to hypoxia [GO:0071456];response to abscisic acid [GO:0009737];response to cadmium ion [GO:0046686];response to heat [GO:0009408];response to water deprivation [GO:0009414]		oxidoreductase activity [GO:0016491];oxidoreductase activity, acting on the CH-OH group of donors, NAD or NADP as acceptor [GO:0016616]	18	0	81.043	219	32.1	32.4	32.1	34	35.2	24	27.1	28.3	O22809	O22809	1166	CRL1	NAD(P)-binding Rossmann-fold superfamily protein	148;155	178;214;278;287;292
269956111907959	265880641937256	2677077293396	267910404205322			oxidoreductase activity [GO:0016491];oxidoreductase activity, acting on the CH-OH group of donors, NAD or NADP as acceptor [GO:0016616]	16	0	14.465	58	28	34.3	34.6	28	43.6	31.8	30.5	30.2	O22810	O22810	1167	CRL2	At2g33600	10;252	6;44;178;214;285;287;292
298455200195313	297122058868408	298212852478027	299208202362061	benzoate metabolic process [GO:0018874];para-aminobenzoic acid metabolic process [GO:0046482];positive regulation of seed germination [GO:0010030];salicylic acid metabolic process [GO:0009696]	cytosol [GO:0005829];intracellular membrane-bounded organelle [GO:0043231]	benzoic acid glucosyltransferase activity [GO:0052641];nicotinate-O-glucosyltransferase activity [GO:0090704];quercetin 3-O-glucosyltransferase activity [GO:0080043];quercetin 7-O-glucosyltransferase activity [GO:0080044];salicylic acid glucosyltransferase (ester-forming) activity [GO:0052639];salicylic acid glucosyltransferase (glucoside-forming) activity [GO:0052640];UDP-glucose:4-aminobenzoate…	24	0	323.31	278	33.6	33.6	32.5	34.1	31.4	26.1	29.6	26.3	O22822	O22822	1169	UGT74F2	UDP-glycosyltransferase 74F2	217	84;89;236;305;316;318;323;385;388;403;427
267742958068848	26564359664917	264791564941406	266549911499023	maturation of SSU-rRNA [GO:0030490];mRNA splicing, via spliceosome [GO:0000398]	nucleolus [GO:0005730];P-body [GO:0000932];small nucleolar ribonucleoprotein complex [GO:0005732];spliceosomal complex [GO:0005681];U4/U6 x U5 tri-snRNP complex [GO:0046540];U6 snRNP [GO:0005688]	RNA binding [GO:0003723]	6	0	10.398	42	34.1	38.5	34.1	34.1	22	22	25.3	25.3	O22823	O22823	1170	LSM6B	Sm-like protein LSM36B		7;20
NaN	NaN	211854362487793	211940021514893		Cul4-RING E3 ubiquitin ligase complex [GO:0080008];cytosol [GO:0005829]		16	0	100.55	102	0	0	3.2	3.2	0	7.6	3.2	3.2	O22826	O22826	1171	At2g43770	At2g43770	144;145;260	129;132;133;180;262
284675827026367	284367046356201	283467617034912	284096908569336	Mo-molybdopterin cofactor biosynthetic process [GO:0006777]	cytosol [GO:0005829];molybdopterin synthase complex [GO:0019008]	molybdopterin synthase activity [GO:0030366]	13	0	50.886	151	51.5	47	44.4	36.4	43.4	34.8	37.4	41.4	O22827	O22827	1172	MOCS2	Molybdopterin synthase catalytic subunit	66;71	6;17;49;82;149;156;188
300195617675781	298733501434326	29997522354126	300220775604248	defense response [GO:0006952];fatty acid biosynthetic process [GO:0006633];fatty acid metabolic process [GO:0006631]	chloroplast stroma [GO:0009570]	acyl-[acyl-carrier-protein] desaturase activity [GO:0045300];metal ion binding [GO:0046872];stearoyl-[acp] desaturase activity [GO:0102786];stearoyl-CoA 9-desaturase activity [GO:0004768]	25	0	121.5	189	51.4	47.4	52.4	49.1	46.1	49.1	46.9	45.4	O22832;Q84VY3	O22832	1173	FAB2	Stearoyl-[acyl-carrier-protein] 9-desaturase 7, chloroplastic	260;366	98;190;205;268;276;360
27333812713623	268679714202881	270890159606934	272588062286377	cell wall macromolecule catabolic process [GO:0016998];chitin catabolic process [GO:0006032];defense response [GO:0006952];polysaccharide catabolic process [GO:0000272]	apoplast [GO:0048046];secretory vesicle [GO:0099503]	chitin binding [GO:0008061];chitinase activity [GO:0004568]	7	0	102.35	40	25.1	19.4	30.4	24	18.7	19.1	15.5	20.8	O22841	O22841	1174	At2g43620	Endochitinase At2g43620	48;55;59;166;174;270
254538745880127	217697143554688	201318225860596	242735538482666	cell wall macromolecule catabolic process [GO:0016998];chitin catabolic process [GO:0006032];defense response [GO:0006952];polysaccharide catabolic process [GO:0000272]	plasma membrane [GO:0005886]	chitin binding [GO:0008061];chitinase activity [GO:0004568]	16	0	67.746	106	3.2	19.9	9.6	14.6	18.1	14.6	9.6	0	O22842	O22842	1175	At2g43610	Endochitinase At2g43610	48;55;59;64;164;172;220;249;268;281	9;10;205;269		5;245;250
266491069793701	275860614776611	263952407836914	269693908691406	plant-type cell wall organization [GO:0009664];syncytium formation [GO:0006949]	cell wall [GO:0005618];extracellular region [GO:0005576];membrane [GO:0016020]		3	0	16.361	26	12.6	9.1	9.1	9.1	12.6	12.6	12.6	16.2	O22874	O22874	1179	EXPA8	Expansin-A8
331794815063477	328549346923828	329947090148926	328970108032227	chlorophyll biosynthetic process [GO:0015995];protoporphyrinogen IX biosynthetic process [GO:0006782]	chloroplast [GO:0009507];chloroplast envelope [GO:0009941];chloroplast stroma [GO:0009570];Golgi apparatus [GO:0005794]	uroporphyrinogen decarboxylase activity [GO:0004853]	34	0	323.31	658	61.4	68.5	67	68.5	69	68.5	61.4	66	O22886	O22886	1180	HEME2	Uroporphyrinogen decarboxylase 2, chloroplastic	87	47;61;81;89;142;215;223;282;346;358;359;364;374					73;80;236;320
251585388183594	251686344146729	249587669372559	246541442871094	mRNA processing [GO:0006397];RNA splicing [GO:0008380]	chloroplast envelope [GO:0009941];spliceosomal complex [GO:0005681]	ATP binding [GO:0005524];RNA binding [GO:0003723];RNA helicase activity [GO:0003724]	29	0	21.472	20	9.3	8.8	14.1	11.5	12.5	7.7	10.2	4.4	O22899	O22899	1182	At2g47250	Probable pre-mRNA-splicing factor ATP-dependent RNA helicase DEAH3	276;296;412;607	61;165;186;394;411;419;447;539;545
270520648956299	269249038696289	268427810668945	271569213867188		nucleus [GO:0005634]	ATP binding [GO:0005524];RNA binding [GO:0003723];RNA helicase activity [GO:0003724]	13	0	12.002	59	11.1	3.8	9.7	11.1	10.4	5.1	8.4	9.5	O22907	O22907	1183	RH24	DEAD-box ATP-dependent RNA helicase 24		273;507
264953670501709	261008720397949	264184284210205	26282808303833	negative regulation of reductive pentose-phosphate cycle [GO:0080153];reductive pentose-phosphate cycle [GO:0019253];response to sucrose [GO:0009744]	chloroplast [GO:0009507];chloroplast envelope [GO:0009941];chloroplast stroma [GO:0009570];cytosol [GO:0005829];protein-containing complex [GO:0032991]	copper ion binding [GO:0005507];nickel cation binding [GO:0016151]	2	0	19.487	13	31.5	31.5	31.5	31.5	24.2	31.5	7.3	31.5	O22914	O22914	1184	CP12-1	Calvin cycle protein CP12-1, chloroplastic	68;77	59
271231708526611	270197734832764	270205154418945	269453659057617	cis assembly of pre-catalytic spliceosome [GO:0000354];mRNA splicing, via spliceosome [GO:0000398]	Cajal body [GO:0015030];cytoplasm [GO:0005737];nucleoplasm [GO:0005654];spliceosomal complex [GO:0005681];U2 snRNP [GO:0005686]	RNA binding [GO:0003723]	6	0	16.743	45	16.4	20.3	16.8	12.1	12.1	17.7	15.5	16.4	O22922	O22922	1185	U2B''	U2 small nuclear ribonucleoprotein B''	32	106
277974872589111	278837852478027	277597045898438	27930046081543	negative regulation of unidimensional cell growth [GO:0051511];regulation of cell wall pectin metabolic process [GO:1902066]	cell wall [GO:0005618];plant-type cell wall [GO:0009505];plasmodesma [GO:0009506]		10	0	37.944	60	26.8	21.4	15.1	18.9	0	0	0	0	O22940	O22940	1186	At2g41800	At2g41800/T11A7.10	178	164		36;95
27633394241333	268290519714355	274167537689209	278085155487061	peptide catabolic process [GO:0043171];proteolysis involved in cellular protein catabolic process [GO:0051603]	cytosol [GO:0005829];mitochondrion [GO:0005739];peroxisome [GO:0005777]	metal ion binding [GO:0046872];metalloendopeptidase activity [GO:0004222]	57	0	286.2	413	8.4	9.1	9.9	8.8	23.8	24.1	20.1	18.9	O22941;A0A1I9LPB3	O22941	1187	PXM16	Insulin-degrading enzyme-like 1, peroxisomal	254;687;717	17;145;153;227;244;264;419;445;522;623;628;634;714;833;838;858;886;894;954					141;235
244298839569092	240527496337891	241997032165527	242135639190674	cellular protein modification process [GO:0006464];defense response [GO:0006952];positive regulation of camalexin biosynthetic process [GO:1901183]	cytosol [GO:0005829];nucleus [GO:0005634]	protein-N-terminal asparagine amidohydrolase activity [GO:0008418];protein-N-terminal glutamine amidohydrolase activity [GO:0070773]	3	0	3.2061	4	7.2	11.3	7.2	7.2	11.3	7.2	7.2	0	O22944	O22944	1188	NTAQ1	Protein N-terminal glutamine amidohydrolase
290380001068115	291225776672363	292165775299072	29230432510376	regulation of programmed cell death [GO:0043067]	cytosol [GO:0005829];endoplasmic reticulum [GO:0005783];nucleus [GO:0005634];plasmodesma [GO:0009506]	mRNA binding [GO:0003729];RNA binding [GO:0003723]	38	0	314.62	363	37.6	37.6	39.8	41.4	51.7	42.7	45.9	43.8	O22957	O22957	1189	At2g34040	Apoptosis inhibitory protein 5 (API5)	77;97;365;444	14;28;49;162;194;281;295;300;387;401;406;422;427;457
234257278442383	247740440368652	235669746398926	NaN	mitochondrial proton-transporting ATP synthase complex assembly [GO:0033615]	mitochondrion [GO:0005739]		4	0	9.1138	25	3.2	3.2	3.2	0	4	0	4	0	O22958	O22958	1190	At2g34050	ATP synthase F1 complex assembly factor
277948875427246	279417896270752	279527149200439	280324935913086		Golgi apparatus [GO:0005794];integral component of membrane [GO:0016021]	O-acetyltransferase activity [GO:0016413]	8	0	50.464	49	18.7	14.3	21.8	17.9	14.8	14.8	12.2	14.3	O22960	O22960	1191	TBL37	Protein trichome birefringence-like 37	115
253419437408447	251311225891113	250403861999512	25020092010498	rRNA processing [GO:0006364]	cytosol [GO:0005829];endoplasmic reticulum [GO:0005783];nucleus [GO:0005634]	nucleic acid binding [GO:0003676]	11	0	10.815	5	33.1	36.9	33.1	40	40	40	40.8	40	O22969	O22969	1192	At2g34160	Uncharacterized protein At2g34160		30;77;87;109
278448162078857	275270118713379	27971529006958	279059257507324		nucleus [GO:0005634]		9	0	33.53	41	12.1	12.1	12.1	12.1	12.1	0	12.1	12.1	O22978	O22978	1194	T19F6.7	T19F6.7 protein		63;147
29569860458374	299702129364014	29902250289917	293170852661133	defense response [GO:0006952]	anchored component of membrane [GO:0031225];anchored component of plasma membrane [GO:0046658];mitochondrion [GO:0005739];plasma membrane [GO:0005886];plasmodesma [GO:0009506]	chitin binding [GO:0008061]	12	0	67.24	106	22.3	30	24.3	22	28	22	22.3	28	O23006	O23006	1195	LYM2	LysM domain-containing GPI-anchored protein 2	159;161;221	62;113;114;140;146;219
300002117156982	300034332275391	30029468536377	300545253753662	oxidation-reduction process [GO:0055114];potassium ion transport [GO:0006813];regulation of ion transmembrane transport [GO:0034765]	extracellular region [GO:0005576];plasma membrane [GO:0005886];plasmodesma [GO:0009506]	aldo-keto reductase (NADP) activity [GO:0004033];voltage-gated ion channel activity [GO:0005244]	25	0	88.432	225	49.4	50.3	44.5	42.7	45.1	39.9	55.5	48.2	O23016	O23016	1196	KAB1	Probable voltage-gated potassium channel subunit beta	39;40;121	34;93;98;105;109;188;221;236;312;320		56
299593372344971	299219570159912	297308349609375	298353443145752	protein modification by small protein conjugation [GO:0032446];protein ufmylation [GO:0071569]	cytoplasm [GO:0005737];cytosol [GO:0005829]	ATP binding [GO:0005524];metal ion binding [GO:0046872];UFM1 activating enzyme activity [GO:0071566]	24	0	323.31	294	49.9	46.4	46.2	46.6	45.2	46.6	47.8	41.1	O23034	O23034	1197	At1g05350	Ubiquitin-like modifier-activating enzyme 5	41;194;208;316;321	6;27;40;50;309;332;377					202;310
264166088104248	267518749237061	263343753814697	269904270172119	hydrogen peroxide catabolic process [GO:0042744];hyperosmotic salinity response [GO:0042538];response to cold [GO:0009409];response to desiccation [GO:0009269];response to oxidative stress [GO:0006979]	endoplasmic reticulum [GO:0005783];extracellular region [GO:0005576];plant-type cell wall [GO:0009505];plasmodesma [GO:0009506]	heme binding [GO:0020037];metal ion binding [GO:0046872];peroxidase activity [GO:0004601]	13	0	240.17	81	22.7	10.1	19	22.4	15.3	30.7	19.3	23	O23044;Q43872;P0DI10	O23044	1198	PER3	Peroxidase 3	68;73;198	227;249					63
286192245483398	283070430755615	28239725112915	286464328765869	embryo development ending in seed dormancy [GO:0009793];translation [GO:0006412]	chloroplast [GO:0009507];chloroplast envelope [GO:0009941];chloroplast stroma [GO:0009570];extracellular region [GO:0005576];ribosome [GO:0005840]	rRNA binding [GO:0019843];structural constituent of ribosome [GO:0003735]	13	0	53.646	119	31.4	27.8	37.7	31.4	31.4	20.6	31.4	22	O23049	O23049	1199	RPL6	50S ribosomal protein L6, chloroplastic		129;181;203;206
250164413452148	253669300079346	24876708984375	25192195892334	regulation of cell cycle [GO:0051726]	nucleus [GO:0005634]		7	0	10.28	12	6.4	2.2	7	7	7	15.7	8.4	6.4	O23126	O23126	1200	At1g22970	At1g22970/F19G10_8
27154411315918	271383876800537	272105751037598	274373798370361	gibberellic acid homeostasis [GO:0010336];mitochondrial electron transport, cytochrome c to oxygen [GO:0006123];mitochondrial electron transport, ubiquinol to cytochrome c [GO:0006122]	cytosol [GO:0005829];mitochondrial intermembrane space [GO:0005758];mitochondrion [GO:0005739];nucleus [GO:0005634];respirasome [GO:0070469];vacuolar membrane [GO:0005774]	copper ion binding [GO:0005507];electron transfer activity [GO:0009055];heme binding [GO:0020037]	8	0	23.85	79	46.5	22.8	50	36	28.1	46.5	52.6	50	O23138	O23138	1201	CYTC-1	Cytochrome c-1		13;17;108		42
247054595947266	25739875793457	245577735900879	253738822937012	endocytosis [GO:0006897];intracellular protein transport [GO:0006886];vesicle-mediated transport [GO:0016192]	clathrin adaptor complex [GO:0030131];clathrin-coated pit [GO:0005905];cytoplasmic vesicle [GO:0031410];Golgi apparatus [GO:0005794];intracellular membrane-bounded organelle [GO:0043231]	lipid binding [GO:0008289]	25	0	52.875	71	6.2	4.3	11.2	6.2	9.1	8.4	11.6	4.6	O23140	O23140	1202	AP2M	AP-2 complex subunit mu	201;211;256;355	210;226;244;299;337;348;430
297974262237549	296682071685791	297905750274658	297811298370361	regulation of proton transport [GO:0010155]	cytosol [GO:0005829];endoplasmic reticulum [GO:0005783];endoplasmic reticulum membrane [GO:0005789];integral component of membrane [GO:0016021];plasma membrane [GO:0005886];plasmodesma [GO:0009506]	mRNA binding [GO:0003729]	41	0	100.32	289	38.9	35.8	37.7	41.7	29.2	23.2	28.8	31.9	O23144	O23144	1204	PPI1	Proton pump-interactor 1		56;91;93;101;116;135;204;208;219;229;231;271;287;292;295;363;386;435;472;496;500
NaN	272805614471436	262928276062012	273716907501221		cytosol [GO:0005829];vacuolar membrane [GO:0005774]		17	0	116.69	91	0	1.2	1.2	1.2	1.2	1.2	1.2	1.2	O23167	O23167	1205	C7A10.170	At4g37190	208;441	467
245933742523193	248792343139648	245276679992676	251751232147217	defense response to fungus, incompatible interaction [GO:0009817];jasmonic acid metabolic process [GO:0009694];salicylic acid metabolic process [GO:0009696];systemic acquired resistance [GO:0009627]		hydrolase activity [GO:0016787];hydrolase activity, acting on ester bonds [GO:0016788];methyl indole-3-acetate esterase activity [GO:0080030];methyl jasmonate esterase activity [GO:0080032];methyl salicylate esterase activity [GO:0080031]	8	0	29.432	35	5.1	16.4	9	14.5	3.9	3.9	3.9	3.9	O23171	O23171	1206	MES9	Methylesterase 9	203
286691207885742	NaN	269439144134521	NaN	defense response [GO:0006952];lateral root formation [GO:0010311];lipid catabolic process [GO:0016042]	cytoplasm [GO:0005737]	acylglycerol lipase activity [GO:0047372];phospholipase activity [GO:0004620]	24	0	166.03	132	8	0	14	0	5.1	2.9	0	5.1	O23179	O23179	1207	PLP1	Patatin-like protein 1	99	136;158;159;237;264;319;348;352;382
252477512359619	NaN	249392127990723	255235176086426	oxidation-reduction process [GO:0055114]	plasma membrane [GO:0005886]	FMN binding [GO:0010181];NAD(P)H dehydrogenase (quinone) activity [GO:0003955]	5	0	25.462	38	17.9	0	13.9	13.9	5.9	5.9	5.9	17.9	O23207	O23207	1209	At4g36750	Probable NAD(P)H dehydrogenase (quinone) FQR1-like 2	155	268
244864635467529	247763061523438	NaN	249855480194092	defense response to bacterium [GO:0042742];mRNA splicing, via spliceosome [GO:0000398]	commitment complex [GO:0000243];nuclear speck [GO:0016607];nucleus [GO:0005634];U2AF [GO:0089701];U2-type prespliceosome [GO:0071004]	poly-pyrimidine tract binding [GO:0008187];pre-mRNA 3'-splice site binding [GO:0030628]	10	0	59.436	41	1.7	5.2	0	1.7	3.1	1.7	5.2	1.2	O23212	O23212	1210	U2AF65A	Splicing factor U2af large subunit A		287;532
195035266876221	18883186340332	196985282897949	194726867675781	hydrogen peroxide catabolic process [GO:0042744];response to oxidative stress [GO:0006979]	cell wall [GO:0005618];extracellular region [GO:0005576]	heme binding [GO:0020037];metal ion binding [GO:0046872];peroxidase activity [GO:0004601]	12	0	59.351	47	4.5	9.1	4.5	4.5	0	0	0	0	O23237;Q9SLH7	O23237	1211	PER49	Peroxidase 49	72;77;119;125	93;100;112
285888862609863	286311416625977	286175785064697	288158302307129	nitrogen compound metabolic process [GO:0006807];photorespiration [GO:0009853]	mitochondrion [GO:0005739];plasma membrane [GO:0005886]	(R)-2-hydroxyglutarate dehydrogenase activity [GO:0051990];2-hydroxyglutarate dehydrogenase activity [GO:0047545];FAD binding [GO:0071949]	21	0	73.937	165	30.4	31.3	32.2	28.1	36.7	21.3	34.9	31.8	O23240	O23240	1212	D2HGDH	D-2-hydroxyglutarate dehydrogenase, mitochondrial	232	116;396;431		266
257073307037354	263062953948975	258419170379639	261390705108643	response to virus [GO:0009615]	cytoplasm [GO:0005737];cytoplasmic stress granule [GO:0010494];cytosol [GO:0005829];eukaryotic translation initiation factor 4F complex [GO:0016281];mRNA cap binding complex [GO:0005845];nucleolus [GO:0005730];nucleus [GO:0005634];P-body [GO:0000932]	RNA 7-methylguanosine cap binding [GO:0000340];translation initiation factor activity [GO:0003743]	7	0	10.855	43	17.9	14.9	10.6	13.2	24.7	13.2	14.9	10.2	O23252	O23252	1213	EIF4E1	Eukaryotic translation initiation factor 4E-1	119
326720886230469	32691707611084	327379989624023	327875480651855	cellular response to tetrahydrofolate [GO:1904482];circadian rhythm [GO:0007623];folic acid metabolic process [GO:0046655];glycine biosynthetic process from serine [GO:0019264];glycine metabolic process [GO:0006544];L-serine catabolic process [GO:0006565];one-carbon metabolic process [GO:0006730];response to cadmium ion [GO:0046686];tetrahydrofolate interconversion [GO:0035999];tetrahydrofolate m…	cytosol [GO:0005829];plasma membrane [GO:0005886];plasmodesma [GO:0009506]	amino acid binding [GO:0016597];cobalt ion binding [GO:0050897];glycine hydroxymethyltransferase activity [GO:0004372];pyridoxal phosphate binding [GO:0030170];serine binding [GO:0070905];zinc ion binding [GO:0008270]	68	0	323.31	1350	88.5	90.2	79.4	78.8	80.3	84.9	93.4	72.2	O23254	O23254	1214	SHM4	Serine hydroxymethyltransferase 4	82;92;187;214;235;364;367	25;27;145;146;160;172;176;183;244;265;278;304;312;316;319;359;362;373;403;424;428;431;435;441;447;452;468;470		66;72;162;293;327;339;343;358;372;374;439;440			1;125;216;253;330;395;459;464;467
344103393554688	343115577697754	343763236999512	343758087158203	DNA methylation-dependent heterochromatin assembly [GO:0006346];embryo development ending in seed dormancy [GO:0009793];one-carbon metabolic process [GO:0006730];posttranscriptional gene silencing [GO:0016441];S-adenosylmethionine cycle [GO:0033353]	cytosol [GO:0005829];plasma membrane [GO:0005886];plasmodesma [GO:0009506];vacuolar membrane [GO:0005774];vacuole [GO:0005773]	adenosylhomocysteinase activity [GO:0004013];copper ion binding [GO:0005507]	71	0	323.31	2264	77.3	76.7	76.7	76.7	77.3	77.3	77.3	82.7	O23255	O23255	1215	SAHH1	Adenosylhomocysteinase 1	42;84;86;120;244;268;277;346	7;15;17;53;152;159;182;190;191;211;235;237;263;275;282;338;340;367;372;384;434;435;441;446;454;464;479		219;228;341;342;347;353	268;346		19;36;40;216;253;259;281;332;336;339;357
313127326965332	311046829223633	312533283233643	313055210113525	cellular response to selenium ion [GO:0071291];response to cadmium ion [GO:0046686];response to hydrogen peroxide [GO:0042542];sulfate assimilation [GO:0000103]	cytosol [GO:0005829];plasmodesma [GO:0009506]	selenium binding [GO:0008430]	47	0	323.31	642	66.5	60.8	61.6	71.2	69.8	61.2	67.6	65.9	O23264	O23264	1216	SBP1	Selenium-binding protein 1	97;100;158;168;484	127;137;142;147;191;196;214;225;229;279;297;312;359;375;380;397;399;415;438;451		15;179;421			292;407;477
244803142547607	239768371582031	247202548980713	242089576721191	defense response [GO:0006952]	cytosol [GO:0005829]		19	0	68.416	81	24.5	24.5	24.5	24.5	24.5	24.5	24.5	24.5	O23267	O23267	1217	dl3070w	AT4g14060/dl3070w	114	14;19;22;65;107;115;122;138					134
192387180328369	193320846557617	198347606658936	193531341552734	translation [GO:0006412]	cytosol [GO:0005829];cytosolic large ribosomal subunit [GO:0022625]	structural constituent of ribosome [GO:0003735]	20	0	74.046	120	19	8.6	10.5	19	8.6	8.6	24.8	8.6	O23290	O23290	1218	RPL36AA	60S ribosomal protein L36a	12;17;74;77;88	6;8;13;15;19;24;29;30;32;40;66;67;78;86;89;97;98;100
24972505569458	255918636322021	251401252746582	250286312103271	fatty acid beta-oxidation [GO:0006635];fatty acid catabolic process [GO:0009062];indolebutyric acid metabolic process [GO:0080024];response to indolebutyric acid [GO:0080026];root hair elongation [GO:0048767]	peroxisome [GO:0005777]	dodecenoyl-CoA delta-isomerase activity [GO:0004165];enoyl-CoA hydratase activity [GO:0004300]	6	0	4.419	23	4.6	26.2	7.9	7.9	4.6	4.6	4.6	4.6	O23299	O23299	1219	ECI2	Enoyl-CoA delta isomerase 2, peroxisomal	225	168		53
273517818450928	272705268859863	272579975128174	273647785186768	positive regulation of transcription, DNA-templated [GO:0045893]	cytosol [GO:0005829];nucleus [GO:0005634]	DNA-binding transcription factor activity [GO:0003700];protein heterodimerization activity [GO:0046982];sequence-specific DNA binding [GO:0043565]	7	0	11.64	46	24.2	24.2	24.2	25.5	26.7	28.6	28.6	28.6	O23310	O23310	1221	NFYB3	Nuclear transcription factor Y subunit B-3		36;37;44;107;115		42
271103820800781	263691120147705	270122261047363	271651878356934	response to high light intensity [GO:0009644]	chloroplast [GO:0009507]	2 iron, 2 sulfur cluster binding [GO:0051537];electron transfer activity [GO:0009055];metal ion binding [GO:0046872]	4	0	95.109	12	33.8	39	26	33.8	20.8	33.8	26	33.8	O23344	O23344	1222	FDC1	Ferredoxin C 1, chloroplastic	126;134	62
257932262420654	262501201629639	255891227722168	257811679840088	carotenoid biosynthetic process [GO:0016117];oxidation-reduction process [GO:0055114]	chloroplast [GO:0009507];chloroplast envelope [GO:0009941];chloroplast membrane [GO:0031969];chloroplast stroma [GO:0009570];cytosol [GO:0005829]	heme binding [GO:0020037];iron ion binding [GO:0005506];monooxygenase activity [GO:0004497];oxidoreductase activity, acting on paired donors, with incorporation or reduction of molecular oxygen [GO:0016705]	7	0	6.6711	12	4.3	4.7	6.9	9	4.7	9	8.4	6.9	O23365	O23365	1223	CYP97B3	Cytochrome P450 97B3, chloroplastic
30280517578125	225743618011475	224846839904785	297720470428467			transferase activity, transferring acyl groups other than amino-acyl groups [GO:0016747]	41	0	323.31	353	2.7	6.7	4.3	2.7	2.7	2.7	2.7	0	O23392	O23392	1224	dl3740c	HSR201-like protein	89;104;260;270;374	7;13;63;65;74;207;216;230;237;266;273;313;324;325;348		52;102;103;351			4;344;353
268709125518799	262642230987549	270934562683105	269663124084473		intracellular membrane-bounded organelle [GO:0043231]	cinnamate beta-D-glucosyltransferase activity [GO:0050412];quercetin 3-O-glucosyltransferase activity [GO:0080043];quercetin 7-O-glucosyltransferase activity [GO:0080044];sinapate 1-glucosyltransferase activity [GO:0050284];UDP-glycosyltransferase activity [GO:0008194]	9	0	10.855	60	11.7	14.6	9.6	16.7	13.4	18.8	14.6	21.7	O23401	O23401	1226	UGT84A3	UDP-glycosyltransferase 84A3	344	430
244868316650391	261329860687256	236035404205322	243821201324463		intracellular membrane-bounded organelle [GO:0043231]	cinnamate beta-D-glucosyltransferase activity [GO:0050412];quercetin 3-O-glucosyltransferase activity [GO:0080043];quercetin 7-O-glucosyltransferase activity [GO:0080044];sinapate 1-glucosyltransferase activity [GO:0050284];UDP-glycosyltransferase activity [GO:0008194]	11	0	57.879	69	3.2	3.6	1.7	4.6	10.1	3.2	4.6	4.6	O23402	O23402	1227	UGT84A4	UDP-glycosyltransferase 84A4	340	205;426
285692806243896	276537609100342	284175586700439	285261535644531	photosystem I assembly [GO:0048564]	chloroplast [GO:0009507];chloroplast stroma [GO:0009570];chloroplast thylakoid lumen [GO:0009543];chloroplast thylakoid membrane [GO:0009535];extrinsic component of membrane [GO:0019898];photosystem II oxygen evolving complex [GO:0009654];thylakoid [GO:0009579];thylakoid lumen [GO:0031977]	calcium ion binding [GO:0005509]	17	0	89.298	115	26.8	23	40.8	30.3	42.9	43.2	42.9	50.9	O23403	O23403	1228	PPD1	PsbP domain-containing protein 1, chloroplastic		122;266;273;286					186
346914558410645	346569862365723	346175231933594	346725082397461	photosynthesis [GO:0015979];pyruvate metabolic process [GO:0006090]	chloroplast [GO:0009507];chloroplast stroma [GO:0009570];cytosol [GO:0005829];nucleus [GO:0005634]	ATP binding [GO:0005524];kinase activity [GO:0016301];metal ion binding [GO:0046872];pyruvate, phosphate dikinase activity [GO:0050242]	114	0	323.31	1763	81.6	82.2	80.4	81.7	81.5	77.4	77.1	66.1	O23404	O23404	1229	PPDK	Pyruvate, phosphate dikinase 1, chloroplastic	331;399;426;556;557;561;650;922;945	91;98;105;108;148;177;242;246;254;257;268;275;282;291;292;356;357;385;407;434;438;451;456;480;484;512;555;625;641;667;678;736;746;817;818;823;830;875;883;904;909		258;317;365;569;629;642;724			107;230;236;384;388;409;410;423;443;457;529;615;627;655;668;670;699;753;771;783;795;834;905
29342845916748	265751075744629	271219863891602	27148120880127	response to toxic substance [GO:0009636]	intracellular membrane-bounded organelle [GO:0043231]	quercetin 3-O-glucosyltransferase activity [GO:0080043];quercetin 7-O-glucosyltransferase activity [GO:0080044];UDP-glycosyltransferase activity [GO:0008194]	22	0	170.24	165	6.3	9.1	5.1	4.6	16.7	15.6	21.7	25.5	O23406	O23406	1230	UGT75D1	UDP-glycosyltransferase 75D1	402;429	33;106;404;413;449;467
20904260635376	217483730316162	21580493927002	207814884185791	galactose metabolic process [GO:0006012]	cytosol [GO:0005829];integral component of membrane [GO:0016021];plasmodesma [GO:0009506]	ATP binding [GO:0005524];galactose binding [GO:0005534];L-arabinokinase activity [GO:0009702]	40	0	235.05	174	0.8	1.7	1.7	1.5	0.8	0.8	4.3	1.5	O23461	O23461	1231	ARA1	L-arabinokinase	181;376;403;741;751;762;987	144;401;597;606;651
247862129211426	255389881134033	NaN	2560817527771	chlorophyll a catabolic process [GO:0033310];demethylation [GO:0070988];jasmonic acid metabolic process [GO:0009694];leaf senescence [GO:0010150];salicylic acid metabolic process [GO:0009696]	cytosol [GO:0005829]	carboxylic ester hydrolase activity [GO:0052689];hydrolase activity [GO:0016787];hydrolase activity, acting on ester bonds [GO:0016788];methyl indole-3-acetate esterase activity [GO:0080030];methyl jasmonate esterase activity [GO:0080032];methyl salicylate esterase activity [GO:0080031];pheophoridase activity [GO:0035560];protein homodimerization activity [GO:0042803]	6	0	5.2085	7	5.7	6.9	0	10.3	3.1	5.7	7.3	0	O23512	O23512	1233	PPD	Probable pheophorbidase	98	207
NaN	NaN	24586519241333	228133316040039	sexual reproduction [GO:0019953]	extracellular region [GO:0005576]		3	0	5.3123	12	0	0	5.2	4	9.2	9.2	5.2	0	O23547	O23547	1235	EXLB1	Expansin-like B1	40;48
310393733978271	316734142303467	306763191223145	307852687835693	maltose biosynthetic process [GO:0000024];response to cold [GO:0009409];starch catabolic process [GO:0005983]	chloroplast stroma [GO:0009570];cytosol [GO:0005829]	amylopectin maltohydrolase activity [GO:0102229];beta-amylase activity [GO:0016161]	51	0	323.31	421	59.7	56	70.3	60.8	69.7	65.7	76.1	71	O23553	O23553	1236	BAM3	Beta-amylase 3, chloroplastic	213;257;282;419;433	68;71;200;288;300;315;345;358;367;371;406;410;440;521;535		269;480			114;339
288677062988281	284574813842773	288388805389404	288623352050781	carbohydrate metabolic process [GO:0005975];carboxylic acid metabolic process [GO:0019752];response to abscisic acid [GO:0009737]	cytosol [GO:0005829];plasma membrane [GO:0005886]	L-lactate dehydrogenase activity [GO:0004459]	17	0	61.23	177	36.8	31.2	29.5	30.3	31.4	30	35.7	33.7	O23569	O23569	1237	dl4665w	L-lactate dehydrogenase		289		319
282665576934814	282262344360352	282601528167725	291231956481934		chloroplast thylakoid lumen [GO:0009543];mitochondrion [GO:0005739];thylakoid [GO:0009579];thylakoid lumen [GO:0031977]	endopeptidase activity [GO:0004175];serine-type peptidase activity [GO:0008236]	17	0	81.731	99	19.2	21.7	22.1	28.5	29.1	31.5	28.7	30.1	O23614	O23614	1239	CTPA2	Carboxyl-terminal-processing peptidase 2, chloroplastic	309;495;497;505	148;442
332760047912598	331973609924316	33268913269043	332400512695313	diadenosine tetraphosphate biosynthetic process [GO:0015966];glycyl-tRNA aminoacylation [GO:0006426];mitochondrial glycyl-tRNA aminoacylation [GO:0070150];response to cadmium ion [GO:0046686]	chloroplast [GO:0009507];cytoplasm [GO:0005737];cytosol [GO:0005829];endosome [GO:0005768];Golgi apparatus [GO:0005794];mitochondrion [GO:0005739];nucleus [GO:0005634];trans-Golgi network [GO:0005802]	ATP binding [GO:0005524];glycine-tRNA ligase activity [GO:0004820];protein dimerization activity [GO:0046983];transferase activity [GO:0016740]	96	0	323.31	1647	68.2	70.4	66.1	67.4	69.1	68.6	69.4	65.2	O23627;Q9FXG2	O23627	1242	At1g29880	Glycine--tRNA ligase, mitochondrial 1	151;176;178;207;218;388;542;618	54;75;87;89;92;97;118;186;193;200;203;215;221;224;232;314;315;357;361;386;421;472;482;487;491;498;499;506;510;528;546;551;559;561;634;638;648;658;696;709		108;112			171;198;243;372;519
258445777893066	261102027893066	261470718383789	262009010314941	nucleosome assembly [GO:0006334]	chloroplast stroma [GO:0009570];chloroplast thylakoid [GO:0009534];cytosol [GO:0005829];nucleolus [GO:0005730];nucleosome [GO:0000786]	DNA binding [GO:0003677];protein heterodimerization activity [GO:0046982]	22	0	4.9846	30	80	74.7	78.7	80	79.3	82	80	82	O23629	O23629	1243	H2B	Histone H2B.6		18;23;25;40;43;51;64;69;72;105;111;112;134;142;146		89			85;88
285000953674316	280957202911377	283746356964111	284852752685547	amylopectin biosynthetic process [GO:0010021];carbohydrate metabolic process [GO:0005975];cellular response to fructose stimulus [GO:0071332];cellular response to glucose stimulus [GO:0071333];cellular response to light stimulus [GO:0071482];cellular response to sucrose stimulus [GO:0071329];glycogen biosynthetic process [GO:0005978];starch biosynthetic process [GO:0019252];starch metabolic proce…	amyloplast [GO:0009501];chloroplast [GO:0009507];chloroplast stroma [GO:0009570];cytoplasm [GO:0005737]	1,4-alpha-glucan branching enzyme activity (using a glucosylated glycogenin as primer for glycogen synthesis) [GO:0102752];1,4-alpha-glucan branching enzyme activity [GO:0003844];cation binding [GO:0043169];hydrolase activity, hydrolyzing O-glycosyl compounds [GO:0004553]	28	0	127.52	219	27.7	19.5	27.3	26	30.3	25.9	32.1	29.8	O23647	O23647	1244	SBE2.1	1,4-alpha-glucan-branching enzyme 2-1, chloroplastic/amyloplastic	702	701		696
277156143188477	275350456237793	276503410339355	277456703186035	homoserine biosynthetic process [GO:0009090];lysine biosynthetic process via diaminopimelate [GO:0009089];threonine biosynthetic process [GO:0009088]	chloroplast stroma [GO:0009570];cytoplasm [GO:0005737]	aspartate kinase activity [GO:0004072];ATP binding [GO:0005524]	14	0	35.4	66	13.8	21.9	19.9	21.5	7.2	10.8	14	10.8	O23653	O23653	1245	AK2	Aspartokinase 2, chloroplastic		297;364
331781463623047	332343521118164	332175788879395	332977523803711	ATP metabolic process [GO:0046034];Golgi organization [GO:0007030];pollen development [GO:0009555]	cell wall [GO:0005618];chloroplast [GO:0009507];chloroplast envelope [GO:0009941];cytosol [GO:0005829];Golgi apparatus [GO:0005794];mitochondrion [GO:0005739];plant-type vacuole [GO:0000325];plasma membrane [GO:0005886];plasmodesma [GO:0009506];proton-transporting V-type ATPase, V1 domain [GO:0033180];vacuolar membrane [GO:0005774];vacuole [GO:0005773]	ATP binding [GO:0005524];protease binding [GO:0002020];proton-transporting ATPase activity, rotational mechanism [GO:0046961]	82	0	323.31	1582	80.4	74.2	76.2	70.6	71.7	69.7	70.3	68.2	O23654	O23654	1246	VHA-A	V-type proton ATPase catalytic subunit A	134;248;256;279;397;535	8;17;26;87;110;132;202;203;222;267;310;394;396;446;501;509;516;533;568;575;589;603;605;606		270;317;320;555			37;42;207;286;291;298;309;321;343;349;350;371;564
225764636993408	224183864593506	NaN	230557155609131	intracellular protein transport [GO:0006886];Rab protein signal transduction [GO:0032482]	endomembrane system [GO:0012505];Golgi apparatus [GO:0005794];nucleus [GO:0005634];plasma membrane [GO:0005886]	GTP binding [GO:0005525];GTPase activity [GO:0003924]	12	0	78.136	61	5.2	9	0	9	9	5.2	0	9	O23657;O49841	O23657	1247	RABC1	Ras-related protein RABC1	120;151;156;167	139;140
280444259643555	282252235412598	279784736633301	278657302856445		chloroplast [GO:0009507]	oxidoreductase activity [GO:0016491]	15	0	26.335	73	23.2	16.5	19	17.4	18.5	17.9	15.1	19.9	O23673	O23673	1248	At1g02020	Nitroreductase family protein	362	287
283320636749268	286478385925293	282232456207275	283762111663818	embryo development ending in seed dormancy [GO:0009793];mRNA processing [GO:0006397];mRNA transport [GO:0051028];nuclear-transcribed mRNA catabolic process, nonsense-mediated decay [GO:0000184];pollen tube guidance [GO:0010183];positive regulation of gene expression [GO:0010628];regulation of translation [GO:0006417];RNA splicing [GO:0008380]	exon-exon junction complex [GO:0035145];nuclear speck [GO:0016607];nucleolus [GO:0005730];nucleoplasm [GO:0005654];P-body [GO:0000932]	RNA binding [GO:0003723]	15	0	120.52	150	72	60	64	72	64	65.3	71.3	55.3	O23676	O23676	1249	MAGO	Protein mago nashi homolog	114;135	20;45;52
271316337585449	282911415100098	283638191223145	280845127105713		chloroplast [GO:0009507];chloroplast stroma [GO:0009570]	DNA-directed 5'-3' RNA polymerase activity [GO:0003899]	7	0	51.957	53	32	31.6	20.7	27.4	27.4	27.4	32	24.8	O23684	O23684	1250	At2g41950	At2g41950/T6D20.26	157	103;220
310300617218018	307993106842041	309355773925781	310270977020264	proteasomal protein catabolic process [GO:0010498];proteasomal ubiquitin-independent protein catabolic process [GO:0010499];proteasome-mediated ubiquitin-dependent protein catabolic process [GO:0043161];response to zinc ion [GO:0010043]	cytoplasm [GO:0005737];cytosol [GO:0005829];cytosolic ribosome [GO:0022626];nucleus [GO:0005634];proteasome complex [GO:0000502];proteasome core complex [GO:0005839];proteasome core complex, alpha-subunit complex [GO:0019773]	endopeptidase activity [GO:0004175];threonine-type endopeptidase activity [GO:0004298]	28	0	323.31	485	96.6	82.1	89.4	89.4	80.9	96.6	96.6	80.9	O23708	O23708	1252	PAB1	Proteasome subunit alpha type-2-A		50;51;92;102;159;165;171;176;206;212;217		42			79;118;182
296239395141602	297942066192627	295966377258301	294313945770264	proteasomal protein catabolic process [GO:0010498];proteasomal ubiquitin-independent protein catabolic process [GO:0010499];proteasome-mediated ubiquitin-dependent protein catabolic process [GO:0043161]	cytoplasm [GO:0005737];cytosol [GO:0005829];nucleus [GO:0005634];proteasome complex [GO:0000502];proteasome core complex [GO:0005839];proteasome core complex, beta-subunit complex [GO:0019774]	endopeptidase activity [GO:0004175];threonine-type endopeptidase activity [GO:0004298]	24	0	180.41	233	36.6	29.7	49.5	39.6	35.2	37.4	36.6	28.2	O23710	O23710	1253	PBB1	Proteasome subunit beta type-7-A	70;82;83;199;215	68;72;123;124;182;219;240;246;247;254					76
252716674804688	264948482513428	254577941894531	253794784545898	proteasomal protein catabolic process [GO:0010498];proteasomal ubiquitin-independent protein catabolic process [GO:0010499];proteasome-mediated ubiquitin-dependent protein catabolic process [GO:0043161]	cytoplasm [GO:0005737];cytosol [GO:0005829];nucleus [GO:0005634];plasma membrane [GO:0005886];plasmodesma [GO:0009506];proteasome complex [GO:0000502];proteasome core complex [GO:0005839];proteasome core complex, alpha-subunit complex [GO:0019773]	endopeptidase activity [GO:0004175];threonine-type endopeptidase activity [GO:0004298]	19	0	39.941	40	47.7	44.4	47.7	42.6	44.4	44.4	59.2	52	O23712	O23712	1254	PAF2	Proteasome subunit alpha type-1-B	48;119;209	51;65;115;169;175;189					26
264049167633057	263084144592285	259960842132568	261235656738281	proteasomal protein catabolic process [GO:0010498];proteasomal ubiquitin-independent protein catabolic process [GO:0010499];proteasome-mediated ubiquitin-dependent protein catabolic process [GO:0043161]	apoplast [GO:0048046];cytoplasm [GO:0005737];cytosol [GO:0005829];nucleus [GO:0005634];plasma membrane [GO:0005886];proteasome complex [GO:0000502];proteasome core complex [GO:0005839];proteasome core complex, beta-subunit complex [GO:0019774];secretory vesicle [GO:0099503];vacuolar membrane [GO:0005774];vacuole [GO:0005773]	endopeptidase activity [GO:0004175];threonine-type endopeptidase activity [GO:0004298]	13	0	6.4133	21	18.6	40.2	18.6	32.8	21.6	18.6	18.6	32.8	O23714	O23714	1255	PBD1	Proteasome subunit beta type-2-A	3	180;184					150
306100807189941	305677394866943	30583517074585	305510540008545	proteasomal protein catabolic process [GO:0010498];proteasomal ubiquitin-independent protein catabolic process [GO:0010499];proteasome-mediated ubiquitin-dependent protein catabolic process [GO:0043161];response to cadmium ion [GO:0046686];response to cold [GO:0009409]	apoplast [GO:0048046];cytoplasm [GO:0005737];cytosol [GO:0005829];nucleus [GO:0005634];peroxisome [GO:0005777];proteasome complex [GO:0000502];proteasome core complex [GO:0005839];proteasome core complex, alpha-subunit complex [GO:0019773];vacuolar membrane [GO:0005774];vacuole [GO:0005773]	endopeptidase activity [GO:0004175];threonine-type endopeptidase activity [GO:0004298]	32	0	310.18	393	72.3	61.8	71.9	70.7	68.7	65.1	71.9	67.9	O23715	O23715	1256	PAG1	Proteasome subunit alpha type-3	42;186;217	29;41;43;52;110;167;169;173;178;195;199;221;226;236;240					59;76;246
299198265075684	29896053314209	299094200134277	298634738922119	proteasomal protein catabolic process [GO:0010498];proteasomal ubiquitin-independent protein catabolic process [GO:0010499];proteasome-mediated ubiquitin-dependent protein catabolic process [GO:0043161]	cytoplasm [GO:0005737];nucleus [GO:0005634];proteasome core complex [GO:0005839];proteasome core complex, beta-subunit complex [GO:0019774]	endopeptidase activity [GO:0004175];threonine-type endopeptidase activity [GO:0004298]	21	0	323.31	258	71.9	58.4	68.2	71.9	69	68.2	65.3	59.5	O23717	O23717	1257	PBE1	Proteasome subunit beta type-5-A	109;120	89;90;119;128;179;201					79;102;204;268
302479629516602	303432922363281	303224906921387	301847076416016	isopentenyl diphosphate biosynthetic process, mevalonate pathway [GO:0019287];sterol biosynthetic process [GO:0016126]	cytosol [GO:0005829];peroxisome [GO:0005777]	ATP binding [GO:0005524];diphosphomevalonate decarboxylase activity [GO:0004163];identical protein binding [GO:0042802]	37	0	323.31	489	47.3	47.6	52.7	48.1	53.9	58.3	52.9	62.1	O23722	O23722	1258	MVD1	Diphosphomevalonate decarboxylase MVD1, peroxisomal	49;262;272;386	26;70;96;98;174;180;235;250;259;295;356;369;371;378;412		68			65;144;245;317
NaN	238758640289307	248837623596191	NaN	innate immune response [GO:0045087];leaf morphogenesis [GO:0009965];proteasome-mediated ubiquitin-dependent protein catabolic process [GO:0043161]	cytosol [GO:0005829];plasma membrane [GO:0005886];proteasome complex [GO:0000502];proteasome regulatory particle [GO:0005838]		19	0	86.775	128	0	3.6	4.2	0	0	3.6	6.5	21.1	O24412	O24412	1259	RPN8A	26S proteasome non-ATPase regulatory subunit 7 homolog A		5;16;143;161;188;207		125
305577335357666	306254901885986	306014289855957	30667293548584	cellular response to abscisic acid stimulus [GO:0071215];gibberellin mediated signaling pathway [GO:0010476];positive regulation of protein phosphorylation [GO:0001934];positive regulation of signal transduction [GO:0009967];regulation of translation [GO:0006417];rescue of stalled ribosome [GO:0072344];response to cadmium ion [GO:0046686];response to gibberellin [GO:0009739];response to glucose […	chloroplast [GO:0009507];cytoplasm [GO:0005737];cytosol [GO:0005829];cytosolic ribosome [GO:0022626];cytosolic small ribosomal subunit [GO:0022627];nucleus [GO:0005634];polysomal ribosome [GO:0042788]	enzyme binding [GO:0019899];MAP-kinase scaffold activity [GO:0005078];protein kinase C binding [GO:0005080];ribosome binding [GO:0043022];structural constituent of ribosome [GO:0003735]	48	0	323.31	648	57.8	54.7	63	61.5	63.6	52.3	60.6	63	O24456	O24456	1261	RACK1A	Receptor for activated C kinase 1A	138;155;184;209;242;251	8;38;44;47;50;106;130;139;174;177;185;227;228;266;273;277;282;292		27;161;285			11;17
316446552276611	314553756713867	315669689178467	316429767608643	acetyl-CoA biosynthetic process from pyruvate [GO:0006086];glycolytic process [GO:0006096]	chloroplast [GO:0009507];chloroplast envelope [GO:0009941];chloroplast stroma [GO:0009570];plastid [GO:0009536]	pyruvate dehydrogenase (acetyl-transferring) activity [GO:0004739]	55	0	323.31	704	69.2	68.2	70.1	69.6	66.8	66.6	65.4	58.9	O24457	O24457	1262	PDH-E1 ALPHA	Pyruvate dehydrogenase E1 component subunit alpha-3, chloroplastic	101;168;169;317;416	69;109;133;150;164;207;275;276;294;300;339;341;352;353;359;362;367;371;372;404;420		118			91;282
200026454925537	NaN	200154972076416	199226970672607	intracellular protein transport [GO:0006886];protein secretion [GO:0009306];Rab protein signal transduction [GO:0032482];regulation of exocytosis [GO:0017157];vesicle docking involved in exocytosis [GO:0006904]	cytosol [GO:0005829];endomembrane system [GO:0012505];Golgi membrane [GO:0000139];plasma membrane [GO:0005886]	GTP binding [GO:0005525];GTPase activity [GO:0003924]	9	0	5.2145	20	13.4	7.9	13.4	20.8	10.2	7.9	7.9	10.2	O24466	O24466	1263	RABE1A	Ras-related protein RABE1a	30	28;129;136
314207134246826	312496032714844	31301383972168	31237003326416	methylglyoxal catabolic process to D-lactate via S-lactoyl-glutathione [GO:0019243]	cytosol [GO:0005829];secretory vesicle [GO:0099503]	hydroxyacylglutathione hydrolase activity [GO:0004416];metal ion binding [GO:0046872]	27	0	323.31	440	85.3	67.1	72.5	72.5	72.5	85.3	72.5	83.3	O24496	O24496	1264	GLX2-2	Hydroxyacylglutathione hydrolase cytoplasmic	8;86;111;142;172;239	42;46;48;65;67;74;82;84;95;124;193;197;230;236;240		92;122;190;191			226;246
NaN	225824241638184	NaN	225749397277832	cellular response to hypoxia [GO:0071456];oxygen transport [GO:0015671];response to hypoxia [GO:0001666]	cell wall [GO:0005618];cytosol [GO:0005829];plasma membrane [GO:0005886];plasmodesma [GO:0009506]	heme binding [GO:0020037];metal ion binding [GO:0046872];oxygen binding [GO:0019825]	6	0	9.5619	34	0	11.9	0	5	10.6	5	5	0	O24520	O24520	1265	AHB1	Non-symbiotic hemoglobin 1
295233154296875	294403743743896	292615451812744	294858112335205	fatty acid metabolic process [GO:0006631];triglyceride biosynthetic process [GO:0019432]	cytosol [GO:0005829]	heme binding [GO:0020037];metal ion binding [GO:0046872];oxygen binding [GO:0019825];oxygen carrier activity [GO:0005344]	16	0	54.252	149	73.4	81.6	67.7	65.8	69.6	73.4	70.9	76.6	O24521	O24521	1266	AHB2	Non-symbiotic hemoglobin 2	75	9;15;22;62;86;103;115
245294570922852	248903179168701	248865089416504	243591747283936	cell wall macromolecule catabolic process [GO:0016998];chitin catabolic process [GO:0006032];defense response [GO:0006952];polysaccharide catabolic process [GO:0000272];response to fungus [GO:0009620]		chitin binding [GO:0008061];chitinase activity [GO:0004568]	3	0	3.0266	6	12.5	12.5	9.4	9.4	5.7	8.7	3	12.5	O24598	O24598	1267	At2g43580	Endochitinase At2g43580	156;233
307468719482422	308580875396729	306953620910645	307070140838623	cell wall macromolecule catabolic process [GO:0016998];chitin catabolic process [GO:0006032];leaf senescence [GO:0010150];polysaccharide catabolic process [GO:0000272];response to amitrole [GO:0072722];response to silver ion [GO:0010272];response to virus [GO:0009615];systemic acquired resistance [GO:0009627]	apoplast [GO:0048046];secretory vesicle [GO:0099503]	chitin binding [GO:0008061];chitinase activity [GO:0004568]	16	0	272.73	168	63.5	61.7	61.7	63.2	55.2	63.5	63.5	52.7	O24603	O24603	1268	CHI	Endochitinase CHI	48;55;59;64;96;158;167;190;264;277	99;123;162;171;204;229;258;266
236109924316406	239795436859131	240763492584229	239092140197754	proteasomal protein catabolic process [GO:0010498];proteasomal ubiquitin-independent protein catabolic process [GO:0010499];proteasome-mediated ubiquitin-dependent protein catabolic process [GO:0043161];ubiquitin-dependent protein catabolic process [GO:0006511]	cytoplasm [GO:0005737];nucleus [GO:0005634];plastid [GO:0009536];proteasome complex [GO:0000502];proteasome core complex [GO:0005839];proteasome core complex, alpha-subunit complex [GO:0019773];vacuole [GO:0005773]	endopeptidase activity [GO:0004175];threonine-type endopeptidase activity [GO:0004298]	19	0	12.977	15	60.8	53.6	53.6	38.4	60.8	57.2	60.8	60.8	O24616	O24616	1269	PAD2	Proteasome subunit alpha type-7-B	74	48;49;53;62;78;87;176;231		68
284543075561523	285725364685059	284571285247803	285292110443115	proteasomal protein catabolic process [GO:0010498];proteasomal ubiquitin-independent protein catabolic process [GO:0010499];proteasome-mediated ubiquitin-dependent protein catabolic process [GO:0043161]	cytoplasm [GO:0005737];nucleus [GO:0005634];proteasome core complex [GO:0005839];proteasome core complex, beta-subunit complex [GO:0019774]	endopeptidase activity [GO:0004175];threonine-type endopeptidase activity [GO:0004298]	20	0	104.82	142	33.2	57.3	31.2	40.2	40.2	35.2	40.7	57.8	O24633	O24633	1270	PBD2	Proteasome subunit beta type-2-B	3	34;42;94;180;184		71			150
316501865386963	316334381103516	316201248168945	316157913208008	protein transport [GO:0015031];small GTPase mediated signal transduction [GO:0007264];vesicle-mediated transport [GO:0016192]	apoplast [GO:0048046];cytoplasm [GO:0005737];cytosol [GO:0005829];plasmodesma [GO:0009506]	GTPase activator activity [GO:0005096];Rab GDP-dissociation inhibitor activity [GO:0005093];Rab GTPase binding [GO:0017137]	56	0	323.31	868	68.5	70.9	68.5	60.4	68.9	70.9	67.6	63.1	O24653	O24653	1271	GDI2	Guanosine nucleotide diphosphate dissociation inhibitor 2	17;256;278;283;337;338	53;54;60;78;85;102;112;114;117;127;136;141;152;155;168;173;209;253;265;277;279;280;291;325;330;347;349		83;179;193			1;33;75;76;123;206;208;305;333
295607242584229	297809429168701	296346244812012	298075180053711	cell wall macromolecule catabolic process [GO:0016998];chitin catabolic process [GO:0006032];defense response [GO:0006952];polysaccharide catabolic process [GO:0000272]	secretory vesicle [GO:0099503]	chitin binding [GO:0008061];chitinase activity [GO:0004568]	8	0	323.31	204	38.6	38.3	38.6	38.6	32.6	38.6	38.6	38.6	O24658	O24658	1272	At2g43590	Endochitinase At2g43590	133;146;155;232;251;264	159		139;228;233;236			230
NaN	21473876953125	205913105010986	NaN	translation [GO:0006412]	cytosol [GO:0005829];cytosolic ribosome [GO:0022626];cytosolic small ribosomal subunit [GO:0022627];nucleolus [GO:0005730];plasma membrane [GO:0005886];plasmodesma [GO:0009506];polysomal ribosome [GO:0042788]	mRNA binding [GO:0003729];structural constituent of ribosome [GO:0003735]	44	0	248.56	140	0	6	10.8	4.4	0	0	5.6	0	O48549	O48549	1276	RPS6A	40S ribosomal protein S6-1	12;56;83;102	2;14;15;23;30;46;51;53;58;64;117;118;131;145;150;151;172;176;179;202;205;215;234;235;245		7;207			63
276037826538086	275521545410156	272194652557373	274810829162598	cellular response to hypoxia [GO:0071456]		hydrolase activity [GO:0016787]	14	0	31.931	91	46.3	39.6	35.7	42.4	43.9	48.6	47.1	47.1	O48587	O48587	1277	T19K24.16	At5g44730	42	8
307543792724609	308267650604248	307455902099609	309203243255615		cytosol [GO:0005829]	catalytic activity [GO:0003824];molybdenum ion binding [GO:0030151];pyridoxal phosphate binding [GO:0030170]	31	0	322.4	378	64.6	65.9	68.2	64.9	66.9	73.1	64.6	74.7	O48588	O48588	1278	T19K24.17	Molybdenum cofactor sulfurase family protein	18;198;225	16;131;226;239;248;259;260;286;289;299		212			237
324936447143555	324244995117188	325512390136719	32463436126709	asparaginyl-tRNA aminoacylation [GO:0006421];plant ovule development [GO:0048481]	chloroplast [GO:0009507];chloroplast stroma [GO:0009570];mitochondrion [GO:0005739]	asparagine-tRNA ligase activity [GO:0004816];ATP binding [GO:0005524];DNA binding [GO:0003677]	37	0	323.31	487	42.7	40.7	43.6	41.8	43.6	40.9	40.9	39	O48593	O48593	1279	SYNO	Asparagine--tRNA ligase, chloroplastic/mitochondrial	195;381	84;98;291;394;426;432;476;515					115;385;481;483
304134693145752	304305171966553	303201236724854	303702564239502	response to cadmium ion [GO:0046686];response to oxidative stress [GO:0006979]	chloroplast [GO:0009507];cytosol [GO:0005829];mitochondrion [GO:0005739];plasma membrane [GO:0005886]	glutathione peroxidase activity [GO:0004602];peroxidase activity [GO:0004601];phospholipid-hydroperoxide glutathione peroxidase activity [GO:0047066]	31	0	257.24	404	68.5	67.7	66.4	68.5	68.5	65.9	68.5	56.9	O48646	O48646	1280	GPX6	Probable phospholipid hydroperoxide glutathione peroxidase 6, mitochondrial	105;134;153	79;82;92;123;157;165;172;178;181;184;193;198;203;222;225;226		84;169
305392684936523	307483921051025	305338954925537	30619556427002	polyamine biosynthetic process [GO:0006596];spermidine biosynthetic process [GO:0008295]	cytosol [GO:0005829];mitochondrion [GO:0005739];plasma membrane [GO:0005886]	spermidine synthase activity [GO:0004766]	23	0	323.31	347	63.5	59.1	62.9	61.5	64.7	62.9	67.4	66.5	O48661	O48661	1281	SPDSYN2	Spermidine synthase 2	154;236;256;311;326	15;70;127;158;165;219;295;308		24;25;33			29;159;246
308405609130859	307084941864014	306674633026123	30578577041626	defense response by callose deposition in cell wall [GO:0052544];defense response to bacterium [GO:0042742];glucosinolate biosynthetic process [GO:0019761]	cytosol [GO:0005829];intracellular membrane-bounded organelle [GO:0043231];nucleus [GO:0005634]	quercetin 3-O-glucosyltransferase activity [GO:0080043];quercetin 7-O-glucosyltransferase activity [GO:0080044];thiohydroximate beta-D-glucosyltransferase activity [GO:0047251];UDP-glucose: 4-methylthiobutylhydroximate S-glucosyltransferase activity [GO:0102659];UDP-glucose: 6-methylthiohexylhydroximate S-glucosyltransferase activity [GO:0103100];UDP-glucose: 9-methylthiononylhydroximate S-glucos…	35	0	295.8	483	49.6	42	46.3	45.9	47.6	47.2	47.6	47.2	O48676	O48676	1282	UGT74B1	UDP-glycosyltransferase 74B1	141;265;413	7;9;146;251;259;263;318;328;391;397;406;415;425;432;434;439;460		88;149			418;441
26131986618042	266993560791016	264920387268066	267677459716797	cell wall modification [GO:0042545];pectin catabolic process [GO:0045490];response to bacterium [GO:0009617]	cell wall [GO:0005618];extracellular region [GO:0005576]	aspartyl esterase activity [GO:0045330];pectinesterase activity [GO:0030599];pectinesterase inhibitor activity [GO:0046910]	5	0	10.406	27	9	6.2	9	9	11.2	11.2	7.1	6.2	O48711	O48711	1284	PME12	Probable pectinesterase/pectinesterase inhibitor 12
288207378387451	28476224899292	289111938476563	286277008056641	chloroplast accumulation movement [GO:0009904];chloroplast avoidance movement [GO:0009903]	cytosol [GO:0005829];peroxisome [GO:0005777];plasma membrane [GO:0005886]		25	0	62.364	151	14.7	14.6	12	16	19.1	16.4	18.8	20.8	O48724	O48724	1286	WEB1	Protein WEAK CHLOROPLAST MOVEMENT UNDER BLUE LIGHT 1		156;188;354;508;538;540;606;673;682
243703269958496	253216171264648	255276679992676	245709743499756	ubiquitin-dependent protein catabolic process [GO:0006511]	cytoplasm [GO:0005737];nucleus [GO:0005634];proteasome regulatory particle, lid subcomplex [GO:0008541]	endopeptidase activator activity [GO:0061133];proteasome binding [GO:0070628];ubiquitin binding [GO:0043130]	8	0	25.24	33	12.7	10	22.7	21.7	6.7	14.7	15.7	8.3	O48726	O48726	1287	RPN13	26S proteasome regulatory subunit RPN13		87
299290294647217	299583683013916	29789083480835	297562084197998	cell redox homeostasis [GO:0045454];glycerol ether metabolic process [GO:0006662];negative regulation of catalytic activity [GO:0043086];positive regulation of catalytic activity [GO:0043085];regulation of carbohydrate metabolic process [GO:0006109];response to cold [GO:0009409]	apoplast [GO:0048046];chloroplast [GO:0009507];chloroplast envelope [GO:0009941];chloroplast stroma [GO:0009570];cytoplasm [GO:0005737];extracellular region [GO:0005576];stromule [GO:0010319];thylakoid [GO:0009579]	enzyme activator activity [GO:0008047];enzyme inhibitor activity [GO:0004857];oxidoreductase activity, acting on a sulfur group of donors, disulfide as acceptor [GO:0016671];protein disulfide oxidoreductase activity [GO:0015035];protein-disulfide reductase activity [GO:0047134]	13	0	228.03	144	39.7	39.7	39.7	39.7	38.5	35.2	39.7	39.7	O48737	O48737	1288	At1g03680	Thioredoxin M1, chloroplastic		120;126;129;159;168;177		155			109
322424926757813	319473667144775	322572402954102	321784858703613	chlorophyll biosynthetic process [GO:0015995];photosynthesis [GO:0015979]	chloroplast [GO:0009507];chloroplast envelope [GO:0009941];chloroplast membrane [GO:0031969];chloroplast thylakoid [GO:0009534];chloroplast thylakoid membrane [GO:0009535];extracellular region [GO:0005576]	NADPH dehydrogenase activity [GO:0003959];protochlorophyllide reductase activity [GO:0016630]	43	0	323.31	515	67.6	63.6	67.6	65.8	63.8	60.8	60.8	62.3	O48741	O48741	1289	PORC	Protochlorophyllide reductase C, chloroplastic	121;173;282;309	89;107;114;126;129;138;183;215;216;222;274;277;280;332;336;346;389;396		258;261			119;136;144;284
301072425842285	298216209411621	300519351959229	301572589874268	cell redox homeostasis [GO:0045454];response to endoplasmic reticulum stress [GO:0034976]	endoplasmic reticulum [GO:0005783];endoplasmic reticulum lumen [GO:0005788];Golgi apparatus [GO:0005794];plasma membrane [GO:0005886];vacuole [GO:0005773]	protein disulfide isomerase activity [GO:0003756]	26	0	193.07	359	39.5	36.6	39.5	38.9	42.3	40.5	37	41.8	O48773	O48773	1291	PDIL2-3	Protein disulfide-isomerase 2-3	60;63;220	72;78;107;113;125;133;136;197;203;214;231;314
246923217773438	248218688964844	243116054534912	247384605407715	carbohydrate metabolic process [GO:0005975]		beta-glucosidase activity [GO:0008422];scopolin beta-glucosidase activity [GO:0102483]	6	0	11.725	31	3.4	7.8	3.3	3.1	7.2	5.9	7.8	7.2	O48779	O48779	1292	BGLU33	Beta-glucosidase 33	247	350
279905891418457	279714202880859	280031909942627	279135360717773	carotenoid biosynthetic process [GO:0016117];cellular response to UV-C [GO:0071494];chloroplast-nucleus signaling pathway [GO:0010019];flavonoid biosynthetic process [GO:0009813];heme oxidation [GO:0006788];photosynthesis [GO:0015979];phytochromobilin biosynthetic process [GO:0010024];regulation of meristem growth [GO:0010075];regulation of stomatal movement [GO:0010119]	chloroplast [GO:0009507]	heme binding [GO:0020037];heme oxygenase (decyclizing) activity [GO:0004392];metal ion binding [GO:0046872]	17	0	30.639	94	33	41.5	34.8	37.6	31.9	37.9	35.5	26.6	O48782	O48782	1293	HO1	Heme oxygenase 1, chloroplastic	197;262	72;88;92;99;108;249;259;271
276887245178223	275684833526611	278396606445313	280980834960938		integral component of membrane [GO:0016021];peroxisome [GO:0005777];plasma membrane [GO:0005886]	ATP binding [GO:0005524];protein kinase activity [GO:0004672]	15	0	107.66	85	13.5	21.3	16	16.9	19.3	21.4	19.1	17.5	O48788	O48788	1294	At2g26730	Probable inactive receptor kinase At2g26730		379;389;402;416;419					325;426
311473445892334	309072017669678	312196273803711	31207052230835		cytosol [GO:0005829];nucleus [GO:0005634]		48	0	323.31	479	60.7	57.8	60.6	60.2	50.2	55.1	55.9	55.7	O48802	O48802	1295	CLMP1	Protein CLMP1	98;203;310;358;480;521;698	10;159;169;249;258;265;268;294;332;368;431;433;492;525;535;619;643;644;653;699;702;707;717		76;243			306
316822338104248	316980152130127	316129837036133	316764030456543	circadian rhythm [GO:0007623];response to abscisic acid [GO:0009737];response to cold [GO:0009409];response to high light intensity [GO:0009644];response to salt stress [GO:0009651];response to water deprivation [GO:0009414]	chloroplast [GO:0009507];plasma membrane [GO:0005886]		43	0	323.31	672	64.4	71	72.3	73.9	74.6	77	77	76.3	O48832	O48832	1297	ERD7	Protein EARLY-RESPONSIVE TO DEHYDRATION 7, chloroplastic	93;236;272;369	175;204;209;229;256;288;293;296;306;316;331;344;347;348;394;430;434;440		284			165;317;380
275916366577148	269945316314697	266138610839844	276957111358643	proteasome-mediated ubiquitin-dependent protein catabolic process [GO:0043161];regulation of protein catabolic process [GO:0042176]	cytosol [GO:0005829];endoplasmic reticulum [GO:0005783];nucleus [GO:0005634];proteasome complex [GO:0000502];proteasome regulatory particle, base subcomplex [GO:0008540];proteasome storage granule [GO:0034515]	enzyme regulator activity [GO:0030234]	61	0	323.31	411	10.7	10.7	10.8	12.5	8.2	10.9	10.7	7.7	O48844	O48844	1298	RPN2A	26S proteasome non-ATPase regulatory subunit 1 homolog A	145;161;489	120;144;166;279;361;364;410;469;730;737;761;763;809;825;837;848;850;855;860;865;871;880;882;903;926;929;950					5;15;127;432;542
318149757385254	317654857635498	317831611633301	318796062469482	cellular response to phosphate starvation [GO:0016036];glycolipid biosynthetic process [GO:0009247];sulfolipid biosynthetic process [GO:0046506]	chloroplast [GO:0009507];plasma membrane [GO:0005886]	sulfotransferase activity [GO:0008146];UDPsulfoquinovose synthase activity [GO:0046507];zinc ion binding [GO:0008270]	31	0	323.31	439	54.7	54.3	49.9	59.7	54.3	53.9	61	56.2	O48917	O48917	1300	SQD1	UDP-sulfoquinovose synthase, chloroplastic	96;112;221;280;327;357	107;299;341;367;402;421;466;467					305
227387180328369	NaN	227224655151367	NaN	cell wall organization [GO:0071555];cellulose biosynthetic process [GO:0030244];hyperosmotic salinity response [GO:0042538];plant-type primary cell wall biogenesis [GO:0009833]	endosome [GO:0005768];Golgi apparatus [GO:0005794];integral component of membrane [GO:0016021];plasma membrane [GO:0005886];trans-Golgi network [GO:0005802]	cellulose synthase (UDP-forming) activity [GO:0016760];cellulose synthase activity [GO:0016759];metal ion binding [GO:0046872]	9	0	15.386	36	1.1	0	1.1	0	0	0	0	0	O48946;REV__Q93YR3	O48946	1301	CESA1	Cellulose synthase A catalytic subunit 1 [UDP-forming]	80;81;84	85
295610523223877	29857479095459	295728797912598	297400817871094	chloroplast accumulation movement [GO:0009904];chloroplast avoidance movement [GO:0009903];circadian rhythm [GO:0007623];negative regulation of anion channel activity by blue light [GO:0010362];phototropism [GO:0009638];protein autophosphorylation [GO:0046777];protein phosphorylation [GO:0006468];protein-chromophore linkage [GO:0018298];regulation of proton transport [GO:0010155];regulation of st…	cell surface [GO:0009986];cytoplasm [GO:0005737];cytoplasmic side of plasma membrane [GO:0009898];nucleus [GO:0005634];plasma membrane [GO:0005886];vacuole [GO:0005773]	ATP binding [GO:0005524];blue light photoreceptor activity [GO:0009882];FMN binding [GO:0010181];identical protein binding [GO:0042802];kinase activity [GO:0016301];mRNA binding [GO:0003729];protein kinase activity [GO:0004672];protein serine/threonine kinase activity [GO:0004674]	37	0	234.17	230	27.4	26.9	25.2	25.3	21.9	28.8	26.2	33	O48963	O48963	1302	PHOT1	Phototropin-1	261;939	108;125;129;132;151;152;249;292;404;405;475;603;899		258;259			169;296;375
303729572296143	302332935333252	30542501449585	30525707244873	cell wall modification [GO:0042545];defense response to Gram-negative bacterium [GO:0050829];pectin catabolic process [GO:0045490];response to fungus [GO:0009620];response to nematode [GO:0009624]	apoplast [GO:0048046];cell wall [GO:0005618];cytoplasm [GO:0005737];cytosol [GO:0005829];plasma membrane [GO:0005886]	aspartyl esterase activity [GO:0045330];pectinesterase activity [GO:0030599];pectinesterase inhibitor activity [GO:0046910]	22	0	297.2	221	32.3	28.7	27.4	30.1	27.7	24.7	29.2	33.3	O49006	O49006	1303	PME3	Pectinesterase/pectinesterase inhibitor 3	130;178;206;477	165;189;308;384;455;476;489					457
216661376953125	200980262756348	208635540008545	149862861633301	formation of cytoplasmic translation initiation complex [GO:0001732];translational initiation [GO:0006413]	cytosol [GO:0005829];eukaryotic 43S preinitiation complex [GO:0016282];eukaryotic 48S preinitiation complex [GO:0033290];eukaryotic translation initiation factor 3 complex [GO:0005852];nucleus [GO:0005634]	mRNA binding [GO:0003729];translation initiation factor activity [GO:0003743];translation initiation factor binding [GO:0031369]	83	0	323.31	526	2.2	0.9	1.3	4.3	1.4	1.9	3	0	O49160	O49160	1305	TIF3C1	Eukaryotic translation initiation factor 3 subunit C	373;502;550;563;768	53;56;71;75;88;91;95;104;139;145;147;150;153;161;224;228;232;235;244;245;247;272;342;409;425;435;450;469;589;643;697;707;711;837		860			70;390;479;480;500;556;596
269526042938232	273636932373047	270894203186035	271335945129395	defense response [GO:0006952];response to jasmonic acid [GO:0009753]	vacuole [GO:0005773]	acid phosphatase activity [GO:0003993];nutrient reservoir activity [GO:0045735];transcription factor binding [GO:0008134]	9	0	88.954	61	16.7	18.5	20.4	15.6	8.5	8.1	8.5	8.5	O49195	O49195	1306	VSP1	Vegetative storage protein 1		109;190;235
27084867477417	261515121459961	266048431396484	263710746765137	cysteine biosynthetic process [GO:0019344];hydrogen sulfide biosynthetic process [GO:0070814];sulfate assimilation [GO:0000103]	chloroplast [GO:0009507];plastid [GO:0009536]	adenylylsulfate kinase activity [GO:0004020];ATP binding [GO:0005524]	11	0	36.295	24	13.7	13.3	15	11.3	15.4	18.4	18.8	19.5	O49196	O49196	1307	APK2	Adenylyl-sulfate kinase 2, chloroplastic	103;116;259	91;165;232;236
334394874572754	332496871948242	333357772827148	333140563964844	CTP biosynthetic process [GO:0006241];GTP biosynthetic process [GO:0006183];purine nucleotide metabolic process [GO:0006163];pyrimidine nucleotide metabolic process [GO:0006220];response to oxidative stress [GO:0006979];UTP biosynthetic process [GO:0006228]	chloroplast thylakoid lumen [GO:0009543];cytosol [GO:0005829];mitochondrial inner membrane [GO:0005743];mitochondrial intermembrane space [GO:0005758];mitochondrion [GO:0005739];plastid [GO:0009536]	ATP binding [GO:0005524];cobalt ion binding [GO:0050897];nucleoside diphosphate kinase activity [GO:0004550];zinc ion binding [GO:0008270]	24	0	323.31	669	48.7	48.7	48.7	48.7	48.7	48.7	48.7	48.7	O49203	O49203	1308	NDPK3	Nucleoside diphosphate kinase III, chloroplastic/mitochondrial		96;115;118;123;129;134;173;182;211;219;232		229
222800846099854	250487232208252	226399326324463	22650993347168	'de novo' GDP-L-fucose biosynthetic process [GO:0042351];L-fucose biosynthetic process [GO:0006005]		GDP-L-fucose synthase activity [GO:0050577];isomerase activity [GO:0016853]	23	0	60.457	78	19.2	18	27.6	27.6	23.5	30.3	22.9	26.6	O49213	O49213	1309	GER1	GDP-L-fucose synthase 1	122;160;278	15;18;35;114;158;265;293;302
247126140594482	25604362487793	248642444610596	241866912841797		cytosol [GO:0005829]	amino acid binding [GO:0016597]	20	0	89.116	72	2.9	2.4	5.3	12.8	8.4	14.3	2.9	9.1	O49285	O49285	1310	ACR3	ACT domain-containing protein ACR3	170;248;271;316;348	100;313
267364730834961	261674098968506	265768661499023	264319877624512	rRNA processing [GO:0006364]	nucleolus [GO:0005730]	ATP binding [GO:0005524];RNA binding [GO:0003723];RNA helicase activity [GO:0003724]	14	0	12.117	25	2.6	1.4	2.6	2.6	2.6	1.4	2.6	1.4	O49289	O49289	1311	RH29	Putative DEAD-box ATP-dependent RNA helicase 29		91
308112277984619	305730781555176	307329540252686	305944156646729		chloroplast [GO:0009507];chloroplast stroma [GO:0009570]	carboxyvinyl-carboxyphosphonate phosphorylmutase activity [GO:0008807]	18	0	252.79	203	51	44.5	49.9	48.1	49	49.3	51	51	O49290	O49290	1312	At1g77060	Carboxyvinyl-carboxyphosphonate phosphorylmutase, chloroplastic	110;147;247	137;156;157;164;175;202;290;293					216
290829906463623	292271995544434	298329486846924	29775505065918	photosynthesis [GO:0015979]	chloroplast [GO:0009507];chloroplast stroma [GO:0009570];chloroplast thylakoid [GO:0009534];chloroplast thylakoid lumen [GO:0009543];cytosol [GO:0005829];extrinsic component of membrane [GO:0019898];mitochondrion [GO:0005739];photosystem II oxygen evolving complex [GO:0009654];thylakoid [GO:0009579];thylakoid lumen [GO:0031977]	calcium ion binding [GO:0005509]	12	0	66.397	128	41.5	38.8	35	41.5	41.5	41.5	41.5	47.3	O49292	O49292	1313	PPD4	PsbP domain-containing protein 4, chloroplastic		147;170;196;244
312178955078125	313289756774902	311630306243896	311595458984375	carbohydrate metabolic process [GO:0005975];glucose metabolic process [GO:0006006];response to cadmium ion [GO:0046686]	cytoplasm [GO:0005737];cytosol [GO:0005829];nucleus [GO:0005634];plasma membrane [GO:0005886]	magnesium ion binding [GO:0000287];phosphoglucomutase activity [GO:0004614]	86	0	323.31	1160	59.5	51.1	63.6	53.2	76.7	68.8	73.1	71.5	O49299	O49299	1314	At1g23190	Probable phosphoglucomutase, cytoplasmic 1	225;255;381;384	4;17;53;68;76;90;113;136;152;158;161;202;205;221;258;274;284;310;339;356;361;417;425;457;459;467;477;480;498;507;544;548;566;569		141;423			139;204;306;345;376;380
278944072723389	2801291847229	279891262054443	279899387359619	abscisic acid-activated signaling pathway [GO:0009738];positive regulation of abscisic acid-activated signaling pathway [GO:0009789];positive regulation of GTPase activity [GO:0043547]	cytosol [GO:0005829];nucleus [GO:0005634];plasma membrane [GO:0005886]	GTPase activator activity [GO:0005096];metal ion binding [GO:0046872];phospholipid binding [GO:0005543]	10	0	29.115	82	41.8	41.8	36.4	36.4	44.8	44.8	46.1	40	O49303	O49303	1315	CAR8	Protein C2-DOMAIN ABA-RELATED 8	120	114
305774078369141	307224063873291	306351261138916	305642910003662	defense response [GO:0006952]	cytosol [GO:0005829];nucleus [GO:0005634]		25	0	198.22	349	73.1	70	71.9	72.5	84.4	82.5	84.4	84.4	O49304	O49304	1316	At1g23130	At1g23130/T26J12_10	48;124	26;40;57;73;86;100;103;114;123;127;134;140					30
226286315917969	236985874176025	228234939575195	230360221862793	defense response [GO:0006952]			2	0.004366	1.9007	5	6.8	6.8	6.8	6.8	0	0	0	0	O49305	O49305	1317	At1g23120	At1g23120
239190711975098	245391941070557	242132663726807	241220245361328	chloroplast RNA modification [GO:1900865];cytidine to uridine editing [GO:0016554];mitochondrial mRNA modification [GO:0080156];mitochondrial RNA modification [GO:1900864];mRNA processing [GO:0006397]	chloroplast [GO:0009507];mitochondrion [GO:0005739]	protein dimerization activity [GO:0046983]	2	0	24.541	15	7.6	3.1	3.1	7.6	3.1	3.1	0	3.1	O49429	O49429	1321	MORF1	Multiple organellar RNA editing factor 1, mitochondrial
316101684570313	314760990142822	315872783660889	314755668640137		cytosol [GO:0005829];plasma membrane [GO:0005886]	mRNA binding [GO:0003729]	19	0	323.31	307	80.4	85.6	85.6	80.4	80.4	80.4	68	80.4	O49453	O49453	1323	At4g28440	Uncharacterized protein At4g28440		17;19;24;29;40;94;110;119					93;113
246061992645264	244953365325928	NaN	NaN	chaperone cofactor-dependent protein refolding [GO:0051085]	cytosol [GO:0005829]	chaperone binding [GO:0051087];unfolded protein binding [GO:0051082]	5	0	17.475	13	5.7	9.2	0	0	5.5	0	0	5.5	O49457	O49457	1324	F20O9.160	DNAJ heat shock family protein	180
310326251983643	309846801757813	311206512451172	310837268829346	lignin biosynthetic process [GO:0009809]	cytosol [GO:0005829]	cinnamyl-alcohol dehydrogenase activity [GO:0045551];oxidoreductase activity, acting on the CH-OH group of donors, NAD or NADP as acceptor [GO:0016616];sinapyl alcohol dehydrogenase activity [GO:0052747];zinc ion binding [GO:0008270]	39	0	323.31	463	79.8	80.1	85.2	82.1	51.8	66.9	51.8	55.5	O49482	O49482	1325	CAD5	Cinnamyl alcohol dehydrogenase 5	43;44;47;95;99;100;103;106;114;163;313	55;116;117;137;144;198;201;215;216;293;304;314;316;339		56;62;127			60;195;203;289;303;309;327
333881797790527	334204139709473	334073028564453	333834228515625	cellular amino acid metabolic process [GO:0006520];embryo development ending in seed dormancy [GO:0009793];L-serine biosynthetic process [GO:0006564];megagametogenesis [GO:0009561];pollen development [GO:0009555];sulfur amino acid metabolic process [GO:0000096]	chloroplast [GO:0009507];chloroplast stroma [GO:0009570];mitochondrion [GO:0005739];plasma membrane [GO:0005886];plastid [GO:0009536]	ATP binding [GO:0005524];NAD binding [GO:0051287];phosphoglycerate dehydrogenase activity [GO:0004617]	57	0	323.31	1312	62.2	62.2	57.4	62.7	63.5	61.7	62.2	62.9	O49485	O49485	1326	PGDH1	D-3-phosphoglycerate dehydrogenase 1, chloroplastic	86;102	69;184;189;192;201;210;220;279;281;319;324;327;394;410;413;436;457;491;503;507;509;569;583;587;588;602					90;280;560;573
321320381164551	318005447387695	319679145812988	319069499969482	coumarin biosynthetic process [GO:0009805];lignin biosynthetic process [GO:0009809];methylation [GO:0032259];response to cadmium ion [GO:0046686]	cytosol [GO:0005829];plasma membrane [GO:0005886]	caffeoyl-CoA O-methyltransferase activity [GO:0042409];metal ion binding [GO:0046872];S-adenosylmethionine-dependent methyltransferase activity [GO:0008757]	38	0	323.31	1093	96.5	92.3	86.1	96.5	86.1	97.7	94.6	94.6	O49499	O49499	1327	CCOAOMT1	Caffeoyl-CoA O-methyltransferase 1	244;255	10;20;33;59;67;93;138;144;164;178;186;233		15;24;84;125;128;165;206			58;73;85;122;217;245
249371032714844	24807201385498	249890613555908	246178455352783	intracellular protein transport [GO:0006886];Rab protein signal transduction [GO:0032482]	cytosol [GO:0005829];endomembrane system [GO:0012505];endosome [GO:0005768];plasma membrane [GO:0005886]	GTP binding [GO:0005525];GTPase activity [GO:0003924]	5	0	5.507	20	13.4	5.1	9.7	9.7	8.8	8.8	5.1	5.1	O49513	O49513	1329	RABA1E	Ras-related protein RABA1e
29260534286499	29377742767334	290961742401123	291574745178223	[2Fe-2S] cluster assembly [GO:0044571];iron-sulfur cluster assembly [GO:0016226]	cytosol [GO:0005829];mitochondrion [GO:0005739];plastid [GO:0009536]	ATP binding [GO:0005524];cysteine desulfurase activity [GO:0031071];iron-sulfur cluster binding [GO:0051536];pyridoxal phosphate binding [GO:0030170];zinc ion binding [GO:0008270]	38	0	323.31	374	50.8	40.8	34	44.6	41.3	43.7	41.7	39.1	O49543	O49543	1331	NIFS1	Cysteine desulfurase, mitochondrial	154;159;218;304;377	108;142;143;153;175;219;235;241;259;309;319;332;412;424;428;440;446		279;339			59;73;184;397
254945430755615	253842296600342	257389755249023	256566543579102	cell differentiation [GO:0030154];floral organ development [GO:0048437];gametophyte development [GO:0048229];hormone-mediated signaling pathway [GO:0009755];regulation of meristem growth [GO:0010075];regulation of meristem structural organization [GO:0009934]	integral component of membrane [GO:0016021];plasma membrane [GO:0005886]	ATP binding [GO:0005524];identical protein binding [GO:0042802];protein self-association [GO:0043621];protein serine/threonine kinase activity [GO:0004674];receptor serine/threonine kinase binding [GO:0033612]	5	0.00094073	2.4805	11	2.6	1.9	0.7	0.7	0.7	0.7	1.9	0.7	O49545	O49545	1332	BAM1	Leucine-rich repeat receptor-like serine/threonine-protein kinase BAM1
263008422851563	266433391571045	265934886932373	265148010253906	embryo development ending in seed dormancy [GO:0009793];nucleotide-excision repair [GO:0006289];proteasome-mediated ubiquitin-dependent protein catabolic process [GO:0043161];protein ubiquitination [GO:0016567];red, far-red light phototransduction [GO:0009585]	cullin-RING ubiquitin ligase complex [GO:0031461];cytosol [GO:0005829];nucleus [GO:0005634]	damaged DNA binding [GO:0003684]	31	0	20.035	82	11	13.4	12.3	18	14.8	13	14.1	13.5	O49552	O49552	1333	DDB1B	DNA damage-binding protein 1b	355;370;674;731	185;191;198;703;1018;1021
NaN	243661975860596	24493932723999	246050109863281	mRNA splicing, via spliceosome [GO:0000398]	cytosol [GO:0005829];spliceosomal complex [GO:0005681]		5	0	15.801	29	7.6	11	18.6	11	11	15.9	0	13.1	O49553	O49553	1334	At4g21110	AT4g21110/F7J7_50	117;119;133;136;138;141	10
319304065704346	319949970245361	319229488372803	318846015930176		chloroplast [GO:0009507];chloroplast stroma [GO:0009570]	ATP binding [GO:0005524];phosphoprotein phosphatase activity [GO:0004721];phosphotransferase activity, phosphate group as acceptor [GO:0016776];protein kinase activity [GO:0004672];protein serine/threonine kinase activity [GO:0004674]	38	0	323.31	376	83.9	77.7	72.5	76.9	82.9	64	70.5	72	O49562	O49562	1335	RP1	Pyruvate, phosphate dikinase regulatory protein 1, chloroplastic	143;149;196	164;170;197;240;250;262;288;331;340;342;350;357;358		73;105;231;296			166;188;193;316
246884326934814	249663562774658	248080863952637	246756763458252	chromatin assembly or disassembly [GO:0006333]	chromatin [GO:0000785];cytosol [GO:0005829];nucleus [GO:0005634]	chromatin binding [GO:0003682];DNA binding [GO:0003677];DNA-binding transcription factor activity [GO:0003700];structural constituent of chromatin [GO:0030527]	5	0	10.987	19	24.3	18.1	18.1	18.1	28.5	29.2	29.2	27.1	O49596	O49596	1337	HMGB2	High mobility group B protein 2		71;78;85;91
259860706329346	268976993560791	258233280181885	266063957214355	negative regulation of catalytic activity [GO:0043086];response to karrikin [GO:0080167]	vacuole [GO:0005773]	enzyme inhibitor activity [GO:0004857]	5	0	9.5103	16	31.1	16.1	21.1	31.1	36.1	20	32.2	32.2	O49603	O49603	1338	C/VIF2	Cell wall / vacuolar inhibitor of fructosidase 2	44;141;168
297201080322266	297661819458008	299201107025146	299139919281006	plant-type cell wall modification [GO:0009827]	plasma membrane [GO:0005886]	serine-type endopeptidase activity [GO:0004252];serine-type peptidase activity [GO:0008236]	24	0	144.92	181	25.8	22	23.2	27	29.1	30.2	27.1	27.6	O49607	O49607	1339	SBT1.6	Subtilisin-like protease SBT1.6	382;541	151;454;588;673		362
253782215118408	236905117034912	253672962188721	256730346679688	cellular iron ion homeostasis [GO:0006879];iron-sulfur cluster assembly [GO:0016226]	cytoplasm [GO:0005737];cytosol [GO:0005829];mitochondrial matrix [GO:0005759];mitochondrion [GO:0005739]	2 iron, 2 sulfur cluster binding [GO:0051537];4 iron, 4 sulfur cluster binding [GO:0051539];ferrous iron binding [GO:0008198];structural molecule activity [GO:0005198]	8	0	48.586	34	24	9.6	22.2	29.3	29.3	28.7	35.9	34.1	O49627	O49627	1341	ISU1	Iron-sulfur cluster assembly protein 1	63;133	76;107;154		156
280246429443359	278782997131348	27822380065918	278574485778809		chloroplast [GO:0009507];chloroplast thylakoid [GO:0009534];chloroplast thylakoid membrane [GO:0009535];cytosol [GO:0005829];mitochondrion [GO:0005739];plastoglobule [GO:0010287];thylakoid [GO:0009579];thylakoid lumen [GO:0031977]		12	0	102.2	103	28.7	46.5	31.3	27.4	37.4	27.4	27.4	46.8	O49629	O49629	1342	PAP2	Probable plastid-lipid-associated protein 2, chloroplastic
28083345413208	276978321075439	278526954650879	278269309997559	tRNA threonylcarbamoyladenosine modification [GO:0002949]	cytosol [GO:0005829];EKC/KEOPS complex [GO:0000408];nucleus [GO:0005634]	metal ion binding [GO:0046872];N(6)-L-threonylcarbamoyladenine synthase activity [GO:0061711]	10	0	70.028	94	24.4	20.1	20.7	20.7	24.4	24.6	20.7	20.7	O49653	O49653	1343	GCP2	Probable tRNA N6-adenosine threonylcarbamoyltransferase	164;269	259
299029693603516	304574813842773	303679676055908	30804859161377	carotene catabolic process [GO:0016121]	chloroplast [GO:0009507];chloroplast stroma [GO:0009570];cytosol [GO:0005829];plastoglobule [GO:0010287]	carotenoid dioxygenase activity [GO:0010436];metal ion binding [GO:0046872]	34	0	155.45	293	52.8	57.1	53.3	51.4	57.1	52.9	58.7	50.1	O49675	O49675	1345	CCD4	Probable carotenoid cleavage dioxygenase 4, chloroplastic	507;518	319;320;375;384;443;445;490;496;501;562					354
291453533172607	289946670532227	292586040496826	291343040466309	abscisic acid-activated signaling pathway [GO:0009738];positive regulation of response to water deprivation [GO:1902584];regulation of protein serine/threonine phosphatase activity [GO:0080163]	cytoplasm [GO:0005737];cytosol [GO:0005829];nucleus [GO:0005634];plasma membrane [GO:0005886]	abscisic acid binding [GO:0010427];identical protein binding [GO:0042802];protein homodimerization activity [GO:0042803];protein phosphatase inhibitor activity [GO:0004864];signaling receptor activity [GO:0038023]	19	0	166.08	300	56.5	58.1	59.2	60.7	69.6	63.4	58.6	77.5	O49686	O49686	1346	PYR1	Abscisic acid receptor PYR1	30;65	14;63;131;165;170					73;178
370603485107422	369846038818359	370578308105469	370309562683105	DNA methylation-dependent heterochromatin assembly [GO:0006346];methionine biosynthetic process [GO:0009086];methylation [GO:0032259];positive regulation of histone H3-K9 methylation [GO:0051574];response to cadmium ion [GO:0046686];response to zinc ion [GO:0010043]	apoplast [GO:0048046];chloroplast [GO:0009507];chloroplast stroma [GO:0009570];cytosol [GO:0005829];extracellular region [GO:0005576];peroxisome [GO:0005777];plasma membrane [GO:0005886];plasmodesma [GO:0009506];vacuolar membrane [GO:0005774]	5-methyltetrahydropteroyltriglutamate-homocysteine S-methyltransferase activity [GO:0003871];copper ion binding [GO:0005507];methionine synthase activity [GO:0008705];zinc ion binding [GO:0008270]	122	0	323.31	5957	89.8	88.9	88.9	88.9	88	88.9	86.5	87.3	O50008	O50008	1348	MS1	5-methyltetrahydropteroyltriglutamate--homocysteine methyltransferase 1	328;522;580;636;649;733	18;28;36;47;55;111;136;142;145;166;169;173;183;189;259;273;279;286;319;321;342;348;357;366;372;400;406;425;426;456;457;465;468;472;473;524;588;596;617;678;688;736;739;744;748;755		60;116;129;301;339;362;380;395;428;635;654;672;716;725;749	328	328	49;74;97;107;109;212;538;545;549;554;557;648;663;718;750
306780834197998	305187835693359	305071086883545	304935245513916	arginine biosynthetic process via ornithine [GO:0042450];citrulline biosynthetic process [GO:0019240]	chloroplast [GO:0009507];chloroplast stroma [GO:0009570];intracellular membrane-bounded organelle [GO:0043231]	amino acid binding [GO:0016597];ornithine carbamoyltransferase activity [GO:0004585]	26	0	155.18	389	54.9	53.9	46.9	44	48.8	52.8	45.1	41.3	O50039	O50039	1349	OTC	Ornithine carbamoyltransferase, chloroplastic	333	73;92;97;101;111;113;121;273;301;322;327		344			172;321;362;369
307400493621826	307341651916504	309205379486084	30887508392334	formation of translation preinitiation complex [GO:0001731];positive regulation of translational fidelity [GO:0045903]	cytoplasm [GO:0005737];cytosol [GO:0005829];eukaryotic translation initiation factor 2 complex [GO:0005850];extracellular region [GO:0005576]	GTP binding [GO:0005525];GTPase activity [GO:0003924];translation initiation factor activity [GO:0003743]	34	0	233.13	448	54.2	46.7	54.6	50.8	51.4	48.2	45.2	49.9	O64490	O64490	1351	EIF2 GAMMA	Eukaryotic translation initiation factor 2 gamma subunit	83;107;229;304;427	5;13;14;51;79;82;101;116;259;268;296;303;414;430;433
303141918182373	296933517456055	295897979736328	299662303924561	defense response [GO:0006952];positive regulation of programmed cell death [GO:0043068];protein autoprocessing [GO:0016540]	cytoplasm [GO:0005737];cytosol [GO:0005829];mitochondrion [GO:0005739];plasma membrane [GO:0005886];plasmodesma [GO:0009506]	cysteine-type endopeptidase activity [GO:0004197];cysteine-type peptidase activity [GO:0008234];identical protein binding [GO:0042802]	46	0	323.31	508	38.5	29.4	35.9	34.4	41.1	41.4	35.4	29.2	O64517	O64517	1352	AMC4	Metacaspase-4	32;105;109;130;139;407;418	4;16;31;60;125;149;157;158;182;198;199;210;223;225;249;265;267;268;271;276;293;302;310;320;396		281			132;288;313
32134578704834	319395771026611	320358734130859	320732917785645	embryo development ending in seed dormancy [GO:0009793];transsulfuration [GO:0019346]	chloroplast [GO:0009507];cytosol [GO:0005829];mitochondrion [GO:0005739]	3-mercaptopyruvate sulfurtransferase activity [GO:0016784];sulfurtransferase activity [GO:0016783];thiosulfate sulfurtransferase activity [GO:0004792]	31	0	323.31	646	70.4	64.4	69.7	63.1	68.3	70.2	69.9	69.7	O64530	O64530	1354	STR1	Thiosulfate/3-mercaptopyruvate sulfurtransferase 1, mitochondrial	152;295;305;333;340	135;169;188;217;227;255;294;316;327					104;258;330;344
276218452453613	279415645599365	273936214447021	276654644012451	catabolic process [GO:0009056]		hydrolase activity [GO:0016787];methyl indole-3-acetate esterase activity [GO:0080030]	12	0	59.719	61	17	17.9	22.8	23.7	31	27.7	33.7	26.4	O64640	O64640	1356	CXE8	Probable carboxylesterase 8	142;296	278;305
21793285369873	NaN	216709842681885	219705657958984	response to abscisic acid [GO:0009737];response to salt stress [GO:0009651]	cytosol [GO:0005829];nucleolus [GO:0005730]		6	0	9.8419	27	10.5	0	7.2	10.5	10.5	0	10.5	10.5	O64644	O64644	1358	At2g45640	Histone deacetylase complex subunit SAP18	39	48
260807056427002	260261211395264	251336326599121	258487854003906	acetyl-CoA biosynthetic process from pyruvate [GO:0006086];glycolytic process [GO:0006096];pollen tube development [GO:0048868]	chloroplast envelope [GO:0009941];endoplasmic reticulum [GO:0005783]	pyruvate dehydrogenase (acetyl-transferring) activity [GO:0004739];zinc ion binding [GO:0008270]	16	0	29.051	24	20.9	17.2	19.2	20.9	15.8	13.1	16	15.8	O64688	O64688	1360	E1-BETA-2	Pyruvate dehydrogenase E1 component subunit beta-3, chloroplastic	230;344	124;129;241;303;308;321;333;334					240;345
225540771484375	214478855133057	232107124328613	230147647857666	cytoplasmic microtubule organization [GO:0031122]	endoplasmic reticulum [GO:0005783];nucleus [GO:0005634]	ATP binding [GO:0005524];ATPase activity [GO:0016887];hydrolase activity [GO:0016787];microtubule-severing ATPase activity [GO:0008568]	27	0	130.24	160	9.4	5.5	12.5	4.9	0	0	0	0	O64691;B9DGC0	O64691	1361	CCP1	AT2G34560 protein	315	18;19;113;116;149;154;182;226;316;344;373		130
277235126495361	282059230804443	277112216949463	278649044036865		anchored component of membrane [GO:0031225];endoplasmic reticulum [GO:0005783];plant-type cell wall [GO:0009505];plasma membrane [GO:0005886]		14	0	76.986	64	28.7	21.7	24.4	29.2	31.7	18.7	20.9	18.7	O64696	O64696	1362	At2g34510	Uncharacterized protein At2g34510	190;369	79;207
263917541503906	26253532409668	255646514892578	261254386901855	nitrogen compound metabolic process [GO:0006807];positive regulation of catalytic activity [GO:0043085]		GTP binding [GO:0005525];GTPase activity [GO:0003924];nickel cation binding [GO:0016151]	21	0	225.69	125	10.9	14.9	20	20.7	49.5	42.9	45.1	36	O64700	O64700	1363	UREG	Urease accessory protein G	94;168	19;26;35;113;121;202
28299201965332	280705051422119	281743144989014	277192096710205	cellular response to light stimulus [GO:0071482];peptidyl-threonine dephosphorylation [GO:0035970];thylakoid membrane organization [GO:0010027]	chloroplast [GO:0009507];chloroplast stroma [GO:0009570]	metal ion binding [GO:0046872];phosphoprotein phosphatase activity [GO:0004721]	8	0	51.298	74	25.2	15.4	25.2	16.8	22.5	25.2	25.2	25.2	O64730	O64730	1365	At2g30170	Probable protein phosphatase 2C 26		124
292117137908936	293793334960938	290681495666504	292863693237305	regulation of flower development [GO:0009909]	cytoplasm [GO:0005737];cytosol [GO:0005829];intracellular membrane-bounded organelle [GO:0043231];nucleus [GO:0005634]	UDP-glycosyltransferase activity [GO:0008194]	23	0	103.21	251	33.8	33.2	35.2	35.2	28.4	33.8	33.2	31.4	O64733	O64733	1366	UGT87A2	UDP-glycosyltransferase 87A2	32;202;424	33;417;436					17
273029537200928	276523933410645	282671375274658	278011932373047	COPII-coated vesicle budding [GO:0090114];mRNA transport [GO:0051028];protein transport [GO:0015031]	COPII vesicle coat [GO:0030127];cytosol [GO:0005829];endoplasmic reticulum [GO:0005783];Golgi membrane [GO:0000139];nuclear envelope [GO:0005635];nuclear pore [GO:0005643];nuclear pore outer ring [GO:0031080];nucleolus [GO:0005730]	structural molecule activity [GO:0005198]	29	0	323.31	271	28.8	38.1	35.1	28.8	30.1	29.8	54	22.2	O64740	O64740	1367	SEC13B	Protein transport protein SEC13 homolog B	33;76;122;184;202	24;36;189;192;208;226;237;245;253;256		43			19;200;259
276957111358643	272831268310547	278759593963623	280787734985352	embryo development ending in seed dormancy [GO:0009793];polar nucleus fusion [GO:0010197]	cell wall [GO:0005618];extracellular region [GO:0005576];plasmodesma [GO:0009506]	cinnamyl-alcohol dehydrogenase activity [GO:0045551];coniferyl-alcohol dehydrogenase activity [GO:0050268];FAD binding [GO:0071949];sinapyl alcohol dehydrogenase activity [GO:0052747]	23	0	97.973	164	22.7	8.6	16	16	26.1	20.3	16.5	17.3	O64743	O64743	1368	MEE23	Berberine bridge enzyme-like 15		199;300;385;502		216
303857650756836	305067291259766	304979076385498	30493143081665	response to jasmonic acid [GO:0009753];response to wounding [GO:0009611]	cell wall [GO:0005618];extracellular region [GO:0005576]	FAD binding [GO:0071949];oxidoreductase activity [GO:0016491]	28	0	65.878	236	35.7	40.2	34.4	39.3	41.1	27.8	31.5	27.8	O64745	O64745	1369	At2g34810	Berberine bridge enzyme-like 16	38	82;296;367;389;394;465;474
282980651855469	277420120239258	280699939727783	28335262298584	defense response to fungus [GO:0050832];response to oomycetes [GO:0002239]	cell wall [GO:0005618]		19	0	94.03	121	13.6	13.8	16.6	18.8	23.4	11.9	20.3	16.4	O64757	O64757	1370	At2g34930	Disease resistance family protein / LRR family protein	732	224;746;842		333
212536697387695	NaN	218573017120361	221123523712158		cytosol [GO:0005829];eukaryotic translation initiation factor 2B complex [GO:0005851]	guanyl-nucleotide exchange factor activity [GO:0005085];nucleotidyltransferase activity [GO:0016779];translation initiation factor activity [GO:0003743];translation initiation factor binding [GO:0031369]	24	0	96.425	90	3	0	3	3.7	4.7	3.4	1.6	3	O64760	O64760	1371	At2g34970	At2g34970	215;653	108;170;173;300;354
277330513000488	275630359649658	27582691192627	273679466247559		cytosol [GO:0005829];endoplasmic reticulum [GO:0005783];mitochondrial matrix [GO:0005759];mitochondrion [GO:0005739]	oxidoreductase activity, acting on a sulfur group of donors, disulfide as acceptor [GO:0016671]	10	0	17.724	113	19.6	38.1	28.4	27.8	27.8	41.2	23.2	39.2	O64764	O64764	1372	At2g35010	Thioredoxin O1, mitochondrial		133;169;186
262269973754883	261051349639893	262471714019775	261679649353027	embryo development ending in seed dormancy [GO:0009793];embryo sac development [GO:0009553];pollen development [GO:0009555];UDP-glucose metabolic process [GO:0006011];UDP-N-acetylgalactosamine metabolic process [GO:0019276];UDP-N-acetylglucosamine biosynthetic process [GO:0006048];UDP-N-acetylglucosamine metabolic process [GO:0006047]	cytoplasm [GO:0005737]	UDP-N-acetylgalactosamine diphosphorylase activity [GO:0052630];UDP-N-acetylglucosamine diphosphorylase activity [GO:0003977];uridylyltransferase activity [GO:0070569];UTP:glucose-1-phosphate uridylyltransferase activity [GO:0003983]	18	0	33.271	42	26.1	21.5	22.1	26.9	26.9	30.7	33.5	28.1	O64765	O64765	1373	GLCNAC1PUT2	UDP-N-acetylglucosamine diphosphorylase 2	78;97;146;167;276;498	114;272;305		432
32475227355957	3222412109375	324108924865723	324407005310059	purine nucleotide biosynthetic process [GO:0006164]		IMP cyclohydrolase activity [GO:0003937];phosphoribosylaminoimidazolecarboxamide formyltransferase activity [GO:0004643]	56	0	323.31	1128	83.9	84.2	78.2	82.6	78.5	82.8	76	79.3	O64767	O64767	1374	At2g35040	AICARFT/IMPCHase bienzyme family protein	301;440;456;505;527;528	21;30;69;82;155;158;210;215;217;229;241;248;365;369;375;377;387;388;393;424;435;442;445;453;476;477;483;529;530		38;119			76;102;149;356;457;460
262368087768555	270896224975586	267926559448242	267327270507813	signal transduction [GO:0007165]	cytoplasm [GO:0005737]	ATP binding [GO:0005524];protein kinase activity [GO:0004672];protein serine/threonine/tyrosine kinase activity [GO:0004712]	21	0	23.64	88	7.5	5.6	7.7	7.5	6.4	7	6.4	7.6	O64768	O64768	1375	At2g35050	Kinase superfamily with octicosapeptide/Phox/Bem1p domain-containing protein	1105;1218	554;992;1001
274102973937988	28255973815918	276518478393555	275105075836182	secondary metabolic process [GO:0019748]	extracellular region [GO:0005576]	serine-type carboxypeptidase activity [GO:0004185];transferase activity, transferring acyl groups other than amino-acyl groups [GO:0016747]	13	0	23.529	25	20.1	24.3	22.9	27.5	18.1	28.1	22.9	24	O64810	O64810	1377	SCPL10	Serine carboxypeptidase-like 10	243;281	140;156;244		246;249;254
259891929626465	264039421081543	264252471923828	26410961151123	secondary metabolic process [GO:0019748]	extracellular region [GO:0005576]	serine-type carboxypeptidase activity [GO:0004185];sinapoylglucose-sinapoylglucose O-sinapoyltransferase activity [GO:0047158];transferase activity, transferring acyl groups other than amino-acyl groups [GO:0016747]	6	0	7.21	25	15.1	18.3	18.3	15.1	11.7	15.1	15.1	11.7	O64811	O64811	1378	SCPL9	Serine carboxypeptidase-like 9
NaN	247103023529053	238746452331543	244862194061279	cellular response to abscisic acid stimulus [GO:0071215];chloroplast-nucleus signaling pathway [GO:0010019];negative regulation of seed germination [GO:0010187];peptidyl-serine phosphorylation [GO:0018105];peptidyl-threonine phosphorylation [GO:0018107];regulation of cell cycle [GO:0051726];regulation of growth [GO:0040008];regulation of photoperiodism, flowering [GO:2000028]	chloroplast [GO:0009507];cytosol [GO:0005829];nucleus [GO:0005634];protein kinase CK2 complex [GO:0005956]	ATP binding [GO:0005524];kinase activity [GO:0016301];protein serine/threonine kinase activity [GO:0004674]	13	0	4.6855	15	11.8	4.9	12.7	15.5	17.4	16.2	15	14.4	O64816	O64816	1379	CKA4	Casein kinase II subunit alpha-4, chloroplastic	182	279;340
238629684448242	230015621185303	233458385467529	229595184326172				1	0.00019139	2.7833	4	2.7	2.7	2.7	2.7	2.7	2.7	2.7	0	O64856	O64856	1382	At2g44210	At2g44210/F4I1.2
NaN	235554351806641	232796592712402	233478679656982				3	0.00094733	2.5871	17	0	1.8	1.8	1.8	0	0	0	0	O64858	O64858	1383	At2g44230	At2g44230/F4I1.4
239348106384277	236210918426514	241476345062256	242938976287842	lipid transport [GO:0006869]	anchored component of membrane [GO:0031225];cytosol [GO:0005829];integral component of membrane [GO:0016021];plasma membrane [GO:0005886]	lipid binding [GO:0008289]	1	0.002037	2.1922	14	5.4	5.4	5.4	5.4	5.4	5.4	5.4	5.4	O64865	O64865	1385	AtXYP10	At2g44300	60;61
256519298553467	253883419036865	260360107421875	254378395080566		cytosol [GO:0005829]	calcium ion binding [GO:0005509]	3	0	5.444	16	17.6	7.7	17.6	17.6	7.7	7.7	17.6	17.6	O64866	O64866	1386	At2g44310	Calcium-binding EF-hand family protein		22;36
27899486541748	282811813354492	279554328918457	279945316314697	carbohydrate metabolic process [GO:0005975];defense response by callose deposition in cell wall [GO:0052544];defense response to bacterium [GO:0042742];defense response to fungus, incompatible interaction [GO:0009817];glucosinolate catabolic process [GO:0019762];glucosinolate metabolic process [GO:0019760];indole glucosinolate catabolic process [GO:0042344];induced systemic resistance [GO:0009682…	chloroplast envelope [GO:0009941];membrane [GO:0016020];peroxisome [GO:0005777]	beta-glucosidase activity [GO:0008422];scopolin beta-glucosidase activity [GO:0102483];thioglucosidase activity [GO:0019137]	23	0	116.61	176	18	17.3	23.4	20.7	24.3	25.5	24.3	22.9	O64883	O64883	1388	BGLU26	Beta-glucosidase 26, peroxisomal	271;288	76;80;83;354;360;364;383;504;505
223785400390625	233214111328125	NaN	NaN	5-phosphoribose 1-diphosphate biosynthetic process [GO:0006015];nucleoside metabolic process [GO:0009116];nucleotide biosynthetic process [GO:0009165];purine nucleotide biosynthetic process [GO:0006164];ribonucleoside monophosphate biosynthetic process [GO:0009156]	chloroplast [GO:0009507];cytoplasm [GO:0005737];plastid [GO:0009536];ribose phosphate diphosphokinase complex [GO:0002189]	ATP binding [GO:0005524];kinase activity [GO:0016301];magnesium ion binding [GO:0000287];ribose phosphate diphosphokinase activity [GO:0004749]	7	0	18.581	36	2.8	2.8	0	0	0	0	0	0	O64888	O64888	1389	PRS5	Ribose-phosphate pyrophosphokinase 5, chloroplastic		269
322251853942871	320316390991211	321171569824219	320670852661133	auxin-activated signaling pathway [GO:0009734];CTP biosynthetic process [GO:0006241];GTP biosynthetic process [GO:0006183];purine nucleotide metabolic process [GO:0006163];pyrimidine nucleotide metabolic process [GO:0006220];red, far-red light phototransduction [GO:0009585];response to hydrogen peroxide [GO:0042542];response to UV [GO:0009411];UTP biosynthetic process [GO:0006228]	chloroplast [GO:0009507];chloroplast envelope [GO:0009941];chloroplast stroma [GO:0009570];cytoplasm [GO:0005737];nucleus [GO:0005634];plastid [GO:0009536];thylakoid [GO:0009579]	ATP binding [GO:0005524];metal ion binding [GO:0046872];nucleoside diphosphate kinase activity [GO:0004550]	23	0	226.03	331	45	45	45	45	42.4	45	45	45	O64903	O64903	1390	NDPK2	Nucleoside diphosphate kinase II, chloroplastic	122;219	109;110;113;118;124;132;168;172;206;214		204
298039817810059	296298217773438	296566104888916	296632957458496	protein modification by small protein conjugation [GO:0032446];protein neddylation [GO:0045116]	cytoplasm [GO:0005737];cytosol [GO:0005829];nucleus [GO:0005634]	ATP binding [GO:0005524];NEDD8 activating enzyme activity [GO:0019781];protein heterodimerization activity [GO:0046982]	32	0	136.56	402	40.7	41.2	43.4	46.5	50	43.2	41	42.5	O65041	O65041	1392	ECR1	NEDD8-activating enzyme E1 catalytic subunit	59;215;227;431	20;99;101;107;174;185;243;373;412;424;428;434						431
230013217926025	216993503570557	232320880889893	231246776580811	fatty acid beta-oxidation [GO:0006635];fatty acid beta-oxidation using acyl-CoA oxidase [GO:0033540];lipid homeostasis [GO:0055088];long-chain fatty acid metabolic process [GO:0001676]	peroxisome [GO:0005777]	acyl-CoA oxidase activity [GO:0003997];FAD binding [GO:0071949];fatty acid binding [GO:0005504];flavin adenine dinucleotide binding [GO:0050660]	28	0	63.177	92	3	3.9	4.8	3.3	1.7	2.3	0	1	O65201	O65201	1393	ACX2	Acyl-coenzyme A oxidase 2, peroxisomal	103;450	70;327;537;641;659
312913188934326	312969074249268	313085613250732	312627658843994	fatty acid beta-oxidation [GO:0006635];fatty acid beta-oxidation using acyl-CoA oxidase [GO:0033540];jasmonic acid biosynthetic process [GO:0009695];lipid homeostasis [GO:0055088];long-chain fatty acid metabolic process [GO:0001676];response to cadmium ion [GO:0046686];response to fungus [GO:0009620];response to wounding [GO:0009611]	cytosol [GO:0005829];peroxisome [GO:0005777];plasmodesma [GO:0009506]	acyl-CoA oxidase activity [GO:0003997];FAD binding [GO:0071949];fatty acid binding [GO:0005504];flavin adenine dinucleotide binding [GO:0050660]	48	0	323.31	613	50.3	45.9	50.8	53.3	52.1	45.8	42.8	41.1	O65202	O65202	1394	ACX1	Peroxisomal acyl-coenzyme A oxidase 1	134;376;395;498;576	13;22;50;59;63;111;197;228;381;449;500;538;546;549;550;628;635		195;231;235;239			1;105
305915641784668	306092872619629	305225296020508	30544713973999	polysaccharide catabolic process [GO:0000272]	chloroplast [GO:0009507];chloroplast stroma [GO:0009570]	amylopectin maltohydrolase activity [GO:0102229];beta-amylase activity [GO:0016161]	33	0	323.31	358	50.6	47.4	50.6	48.3	49.3	47.6	50.9	50.2	O65258	O65258	1395	BAM2	Beta-amylase 2, chloroplastic	217;267;291;425;496	224;301;416;478;484;513					507;522
299246482849121	2986741065979	299532432556152	298128814697266	one-carbon metabolic process [GO:0006730];photorespiration [GO:0009853];tetrahydrofolate interconversion [GO:0035999]	chloroplast [GO:0009507];cytosol [GO:0005829]	methenyltetrahydrofolate cyclohydrolase activity [GO:0004477];methylenetetrahydrofolate dehydrogenase (NADP+) activity [GO:0004488]	20	0	186.33	308	64.4	63.9	53.9	64.4	45.8	48.6	64.4	54.2	O65271	O65271	1396	FOLD4	Bifunctional protein FolD 4, chloroplastic	124;319	80;93;130;262;290;354		175			283
339158973693848	338827629089355	338855819702148	338923835754395	chaperone cofactor-dependent protein refolding [GO:0051085];negative regulation of abscisic acid-activated signaling pathway [GO:0009788];positive regulation of superoxide dismutase activity [GO:1901671];protein heterotetramerization [GO:0051290];response to cadmium ion [GO:0046686];response to cold [GO:0009409]	apoplast [GO:0048046];chloroplast [GO:0009507];chloroplast envelope [GO:0009941];chloroplast stroma [GO:0009570];chloroplast thylakoid membrane [GO:0009535];mitochondrial matrix [GO:0005759];mitochondrion [GO:0005739];plastid [GO:0009536];thylakoid [GO:0009579]	ATP binding [GO:0005524];chaperone binding [GO:0051087];copper ion binding [GO:0005507];metal ion binding [GO:0046872];unfolded protein binding [GO:0051082]	42	0	323.31	927	73.1	77.1	73.1	73.1	73.1	73.1	73.1	73.1	O65282;REV__Q9C7N2	O65282	1397	CPN20	20 kDa chaperonin, chloroplastic		63;72;74;79;93;110;112;127;139;144;158;161;170;177;189;191;210;226;233;235		136;239			249
321997299194336	319545955657959	321757850646973	321880416870117	mucilage extrusion from seed coat [GO:0080001];mucilage metabolic process involved in seed coat development [GO:0048359];seed coat development [GO:0010214]	apoplast [GO:0048046];cell wall [GO:0005618];extracellular region [GO:0005576];secretory vesicle [GO:0099503]	serine-type endopeptidase activity [GO:0004252]	31	0	323.31	599	44.1	44.3	44.5	46.4	44.8	43.1	46	44.5	O65351	O65351	1398	SBT1.7	Subtilisin-like protease SBT1.7	403;545	201;397;399;413;452;556;577;580;583;700;711		349;429;433			194;286;302;402;543;572
285181827545166	NaN	287601184844971	287124366760254	cellular response to fatty acid [GO:0071398];defense response [GO:0006952];ethylene biosynthetic process [GO:0009693]	cytosol [GO:0005829]	1-aminocyclopropane-1-carboxylate oxidase activity [GO:0009815];dioxygenase activity [GO:0051213];L-ascorbic acid binding [GO:0031418];metal ion binding [GO:0046872]	5	0	214.63	53	9.7	7.5	10	9.7	9.7	12.2	12.2	12.2	O65378	O65378	1401	At1g12010	1-aminocyclopropane-1-carboxylate oxidase 3		175;295
337045021057129	338280906677246	336130256652832	336354713439941	methylglyoxal catabolic process to D-lactate via S-lactoyl-glutathione [GO:0019243];response to cadmium ion [GO:0046686]	chloroplast envelope [GO:0009941];cytoplasm [GO:0005737];cytosol [GO:0005829];extracellular region [GO:0005576];peroxisome [GO:0005777];plasma membrane [GO:0005886];secretory vesicle [GO:0099503];vacuole [GO:0005773]	dioxygenase activity [GO:0051213];lactoylglutathione lyase activity [GO:0004462];metal ion binding [GO:0046872]	37	0	323.31	902	67.1	67.1	66.1	62.5	65.7	63.6	64.7	61.5	O65398	O65398	1402	GLX1	Lactoylglutathione lyase GLX1	149	12;13;42;46;107;119;129;163;167;176;229;235;244;258;269;276;280			149	149	41;152;171
26810417175293	270197734832764	274073829650879	274294204711914	carbohydrate metabolic process [GO:0005975];defense response [GO:0006952]	anchored component of plasma membrane [GO:0046658];extracellular region [GO:0005576]	glucan endo-1,3-beta-D-glucosidase activity [GO:0042973]	5	0	22.013	32	11.2	4.9	11.2	11.2	9	7.6	7.6	11.2	O65399	O65399	1403	At1g11820	Glucan endo-1,3-beta-glucosidase 1	401	69;84
273039989471436	NaN	274455337524414	27484468460083	anaphase-promoting complex-dependent catabolic process [GO:0031145];cell cycle [GO:0007049];cell division [GO:0051301];embryo development ending in seed dormancy [GO:0009793];plant ovule development [GO:0048481];positive regulation of mitotic metaphase/anaphase transition [GO:0045842];protein K11-linked ubiquitination [GO:0070979]	anaphase-promoting complex [GO:0005680];nuclear periphery [GO:0034399];nucleus [GO:0005634]		3	0	6.2402	9	1.2	1.3	1.2	1.2	0	0	0	1.2	O65418	O65418	1404	APC4	Anaphase-promoting complex subunit 4	237;243	234
315824413299561	315537128448486	316074371337891	316316184997559		cytosol [GO:0005829]	oxidoreductase activity [GO:0016491]	27	0	316.76	500	66.5	68	67.7	71.7	67.7	65.8	66.5	71.7	O65423	O65423	1406	F18E5.200	AT4g21580/F18E5_200	65;86;180;188;215;235	11;26;74;80;176;199;207;255;272;281;293		316			240
239834632873535	NaN	NaN	242855968475342			transferase activity [GO:0016740]	3	0	3.3793	10	15.4	0	0	15.4	15.4	0	0	0	O65448	O65448	1407	At4g22000	At4g22000		4;11
291510028839111	29344181060791	29076379776001	29262149810791	iron ion homeostasis [GO:0055072];iron ion transport [GO:0006826]	plasma membrane [GO:0005886];plasmodesma [GO:0009506]	copper ion binding [GO:0005507];ferroxidase activity [GO:0004322]	13	0	71.558	144	24	24.6	28.1	28.1	28.1	28.1	28.1	26.2	O65449	O65449	1408	sks4	At4g22010		379		83;193;359;367
303953990936279	309756889343262	303533172607422	303905906677246	programmed cell death [GO:0012501];response to salicylic acid [GO:0009751];systemic acquired resistance [GO:0009627]	apoplast [GO:0048046];secretory vesicle [GO:0099503]		7	0	169.8	82	29.4	32.8	36.2	32.8	29.4	24.9	32.8	29.4	O65469	O65469	1409	CRK9	Putative cysteine-rich receptor-like protein kinase 9	94;97;122;201;210;235
263475475311279	249334602355957	252714900970459	259168186187744	programmed cell death involved in cell development [GO:0010623];proteolysis involved in cellular protein catabolic process [GO:0051603]	extracellular space [GO:0005615];lysosome [GO:0005764];nucleus [GO:0005634];plant-type vacuole [GO:0000325];plasma membrane [GO:0005886]	cysteine-type endopeptidase activity [GO:0004197]	7	0	33.144	29	6.8	6.2	4.5	8.5	8.5	6.2	6.8	2.3	O65493	O65493	1410	XCP1	Cysteine protease XCP1		261;326
294026145935059	295922775268555	NaN	261688079833984	photosystem II assembly [GO:0010207]	chloroplast [GO:0009507];chloroplast stroma [GO:0009570];chloroplast thylakoid [GO:0009534];chloroplast thylakoid membrane [GO:0009535];photosystem II [GO:0009523];plasma membrane [GO:0005886];thylakoid membrane [GO:0042651]	translation initiation factor activity [GO:0003743]	4	0	7.49	11	2.3	2.3	0	2	2	2	2	0	O65502	O65502	1411	HCF244	Protein HIGH CHLOROPHYLL FLUORESCENCE PHENOTYPE 244, chloroplastic
264022674560547	259992713928223	269090766906738	257437839508057	signal transduction [GO:0007165]	integral component of membrane [GO:0016021]	ADP binding [GO:0043531]	2	0.0062724	1.6946	11	1.4	1.4	1.4	1.4	1.4	1.4	1.4	1.4	O65507	O65507	1412	At4g36150	Disease resistance protein (TIR-NBS-LRR class) family	685
319934120178223	318973522186279	319579887390137	320053749084473	actin filament capping [GO:0051693];actin filament depolymerization [GO:0030042];actin filament organization [GO:0007015];actin filament severing [GO:0051014];actin polymerization or depolymerization [GO:0008154];cytoplasmic streaming [GO:0099636];response to abscisic acid [GO:0009737];root hair elongation [GO:0048767]	actin cytoskeleton [GO:0015629];cytoplasm [GO:0005737];cytosol [GO:0005829];plasma membrane [GO:0005886]	actin filament binding [GO:0051015]	87	0	323.31	1043	53.8	49.7	57.8	54.1	54.2	52.7	54.5	49.3	O65570	O65570	1414	VLN4	Villin-4	117;208;258;390;420	18;36;41;52;57;71;84;109;153;173;175;200;240;247;261;273;305;309;322;340;376;381;404;443;459;465;501;502;507;582;591;613;674;683;687;723;739;766;832;884;921;946		180;400;517;740
23892822265625	237171192169189	NaN	247568454742432	carotene catabolic process [GO:0016121];carotenoid catabolic process [GO:0016118];xanthophyll catabolic process [GO:0016124]	chloroplast [GO:0009507];chloroplast stroma [GO:0009570];cytoplasm [GO:0005737];cytosol [GO:0005829];Golgi apparatus [GO:0005794];plasma membrane [GO:0005886];plasmodesma [GO:0009506];vacuolar membrane [GO:0005774];vacuole [GO:0005773]	9-cis-epoxycarotenoid dioxygenase activity [GO:0045549];carotenoid dioxygenase activity [GO:0010436];metal ion binding [GO:0046872]	2	0.00094251	2.5206	7	1.3	3.5	0	3.5	0	3.5	2.2	2.2	O65572	O65572	1415	CCD1	Carotenoid 9,10(9',10')-cleavage dioxygenase 1
353672714233398	345572204589844	343299789428711	343309135437012	fructose 1,6-bisphosphate metabolic process [GO:0030388];gluconeogenesis [GO:0006094];glycolytic process [GO:0006096]	cytosol [GO:0005829]	fructose-bisphosphate aldolase activity [GO:0004332]	49	0	323.31	1159	82.4	83.8	79.6	76.5	89.7	83.8	79.6	79.6	O65581	O65581	1416	FBA5	Fructose-bisphosphate aldolase 5, cytosolic	130;173;197;326	7;14;17;24;38;103;106;135;148;164;195;196;210;225;237;306;311;317;327		96;115;162;176;213;227;329			94;228
301970672607422	296823253631592	299972534179688	298128662109375	cold acclimation [GO:0009631];DNA duplex unwinding [GO:0032508];response to cold [GO:0009409];response to salt stress [GO:0009651];response to water deprivation [GO:0009414];RNA secondary structure unwinding [GO:0010501]	cytoplasm [GO:0005737];nucleus [GO:0005634];plasma membrane [GO:0005886]	double-stranded DNA binding [GO:0003690];mRNA binding [GO:0003729];nucleic acid binding [GO:0003676];RNA binding [GO:0003723];single-stranded DNA binding [GO:0003697];zinc ion binding [GO:0008270]	20	0	323.31	353	62.5	62.2	69.9	65.9	60.9	54.5	59.9	67.2	O65639;A0A1P8B8F3	O65639	1420	CSP1;CSDP1	Cold shock protein 1;Cold shock domain protein 1	102;105;134;137;166;169;179;200;203;213;232;235;255;258;282;285	14;70;83;160;182;194;216;284;287		186
NaN	245588245391846	NaN	246403636932373	regulation of growth [GO:0040008];response to cold [GO:0009409];response to salt stress [GO:0009651];response to water deprivation [GO:0009414]	chloroplast thylakoid membrane [GO:0009535];endoplasmic reticulum [GO:0005783];plasma membrane [GO:0005886];plastoglobule [GO:0010287];secretory vesicle [GO:0099503];thylakoid [GO:0009579];vacuolar membrane [GO:0005774];vacuole [GO:0005773]	catalase activity [GO:0004096];heme binding [GO:0020037]	6	0	114.14	54	0	8.8	0	8.8	0	8.8	8.8	0	O65660	O65660	1422	PLAT1	PLAT domain-containing protein 1		42;56					73
268582801818848	27597188949585	266275615692139	26507137298584	positive regulation of leaf senescence [GO:1900057];response to hydroperoxide [GO:0033194]		pinoresinol reductase activity [GO:0010283]	9	0	11.361	38	14.1	27.1	14.1	21.6	24.2	27.1	17.6	20.9	O65679	O65679	1423	PLR3	Probable pinoresinol-lariciresinol reductase 3		98;104
253720550537109	253895568847656	250681705474854	252086601257324	ribosome biogenesis [GO:0042254];rRNA processing [GO:0006364]	chloroplast [GO:0009507]	ribosomal small subunit binding [GO:0043024]	3	0.00019223	2.8374	19	7.4	4.2	7.4	19.5	7.4	3.3	16.3	19.5	O65693	O65693	1424	At4g34730	Probable ribosome-binding factor A, chloroplastic
343733444213867	343696441650391	343488922119141	344158897399902	cellular response to unfolded protein [GO:0034620];chaperone cofactor-dependent protein refolding [GO:0051085];protein refolding [GO:0042026];response to cadmium ion [GO:0046686];response to heat [GO:0009408];response to karrikin [GO:0080167];response to unfolded protein [GO:0006986];response to virus [GO:0009615]	apoplast [GO:0048046];cell wall [GO:0005618];chloroplast [GO:0009507];cytoplasm [GO:0005737];cytosol [GO:0005829];cytosolic ribosome [GO:0022626];Golgi apparatus [GO:0005794];nuclear matrix [GO:0016363];plasma membrane [GO:0005886];plasmodesma [GO:0009506];vacuolar membrane [GO:0005774];vacuole [GO:0005773]	ATP binding [GO:0005524];ATPase activity [GO:0016887];heat shock protein binding [GO:0031072];misfolded protein binding [GO:0051787];protease binding [GO:0002020];protein folding chaperone [GO:0044183];unfolded protein binding [GO:0051082]	85	0	323.31	1322	81.8	72.7	81.8	81.8	81.8	81.7	81.8	77.3	O65719	O65719	1425	HSP70-3	Heat shock 70 kDa protein 3	20;319;326;366;609	59;74;91;98;104;112;116;144;163;191;192;252;254;256;257;318;325;331;334;351;363;367;429;430;457;504;506;513;518;523;530;532;541;545;563;567;573;603;615		34;60;145;155;172;178;241;245;312;335;361;440;505;511;546;550;554		609	64;106;126;131;174;243;320;332;524;555;602
28694881439209	289829139709473	287721576690674	288320732116699	cytidine catabolic process [GO:0006216];cytidine deamination [GO:0009972]	cytosol [GO:0005829];mitochondrion [GO:0005739]	cytidine deaminase activity [GO:0004126];deoxycytidine deaminase activity [GO:0047844];protein homodimerization activity [GO:0042803];zinc ion binding [GO:0008270]	23	0	285.25	222	31.9	45.5	45.5	47.2	27.2	38.9	38.5	49.2	O65896	O65896	1426	CDA1	Cytidine deaminase 1	104;107;183;211;220;291;298	3;11;45;121;269;290;294		184
313248519897461	314965763092041	314187049865723	314520893096924	actin cytoskeleton organization [GO:0030036];actin polymerization or depolymerization [GO:0008154];cell morphogenesis [GO:0000902];establishment or maintenance of cell polarity [GO:0007163];regulation of adenylate cyclase activity [GO:0045761];unidimensional cell growth [GO:0009826]	cortical actin cytoskeleton [GO:0030864];cytosol [GO:0005829]	actin binding [GO:0003779];adenylate cyclase binding [GO:0008179]	64	0	323.31	802	65.8	80.9	70.6	75	83	65.8	78.2	74.2	O65902	O65902	1427	CAP1	Cyclase-associated protein 1	60;140;156;343;373	7;70;80;90;97;101;120;186;195;198;210;224;231;251;259;286;288;302;308;313;318;326;335;336;364;372;375;465		22			1;119
340200271606445	337335815429688	341123313903809	339660224914551	cellular response to light intensity [GO:0071484];cellular response to oxidative stress [GO:0034599];cellular response to ozone [GO:0071457];cellular response to salt stress [GO:0071472];cellular response to sucrose stimulus [GO:0071329];cellular response to UV-B [GO:0071493];gene silencing by miRNA [GO:0035195];removal of superoxide radicals [GO:0019430];response to copper ion [GO:0046688];respo…	apoplast [GO:0048046];chloroplast [GO:0009507];chloroplast stroma [GO:0009570];extracellular region [GO:0005576];extracellular space [GO:0005615];thylakoid [GO:0009579]	copper ion binding [GO:0005507];superoxide dismutase activity [GO:0004784]	11	0	323.31	532	69.9	69.9	69.9	69.9	69.9	69.9	69.9	69.9	O78310	O78310	1428	CSD2	Superoxide dismutase [Cu-Zn] 2, chloroplastic	119;140;208	72;185;190		117;127;129;130;150;152;164;172;201			131
264733467102051	269113655090332	246073837280273	270835494995117	cell cycle [GO:0007049];cell division [GO:0051301];maintenance of root meristem identity [GO:0010078];positive regulation of transcription by RNA polymerase II [GO:0045944];protein phosphorylation [GO:0006468];regulation of cyclin-dependent protein serine/threonine kinase activity [GO:0000079]	cytoplasm [GO:0005737];cytosol [GO:0005829];nucleus [GO:0005634];transcription factor TFIIK complex [GO:0070985]	ATP binding [GO:0005524];cyclin-dependent protein serine/threonine kinase activity [GO:0004693];protein serine/threonine kinase activity [GO:0004674];RNA polymerase II CTD heptapeptide repeat kinase activity [GO:0008353]	10	0	35.888	65	5.6	4.4	4.4	5.6	9.8	6.3	7.7	8.6	O80345	O80345	1429	CDKF-1	Cyclin-dependent kinase F-1	137	223
273364543914795	264650859832764	267458629608154	266211471557617	anthocyanin-containing compound biosynthetic process [GO:0009718];chlorophyll biosynthetic process [GO:0015995];positive regulation of transcription, DNA-templated [GO:0045893];response to light stimulus [GO:0009416]	nucleus [GO:0005634];plasma membrane [GO:0005886]		10	0	14.275	25	4.3	1.8	3.5	3.5	4.3	3.5	3.5	4.3	O80386	O80386	1430	CIP7	COP1-interacting protein 7	206;213	139		1035
324965057373047	324967422485352	325325965881348	326948852539063	cellular amino acid metabolic process [GO:0006520];pyridoxal phosphate biosynthetic process [GO:0042823];pyridoxine biosynthetic process [GO:0008615]	chloroplast [GO:0009507];cytosol [GO:0005829];endoplasmic reticulum [GO:0005783]	amine-lyase activity [GO:0016843];protein heterodimerization activity [GO:0046982];pyridoxal 5'-phosphate synthase (glutamine hydrolysing) activity [GO:0036381]	26	0	323.31	394	51.5	46.9	53.4	51.5	52.1	48.9	53.4	48.9	O80448	O80448	1433	PDX11	Pyridoxal 5'-phosphate synthase subunit PDX1.1	57;144;146	19;21;27;85;88;98;166;204;205;217;266					15;33;40;60;194
245067596435547	242064266204834	241380558013916	NaN				2	0.0014886	2.293	7	2.1	2.1	2.1	2.1	2.1	2.1	2.1	2.1	O80456	O80456	1436	At2g23390	Acyl-CoA		245;247
326138610839844	325111656188965	324965057373047	324797172546387	jasmonic acid metabolic process [GO:0009694];nicotinate metabolic process [GO:1901847];salicylic acid metabolic process [GO:0009696]	cytosol [GO:0005829];vacuole [GO:0005773]	carboxylic ester hydrolase activity [GO:0052689];hydrolase activity [GO:0016787];hydrolase activity, acting on ester bonds [GO:0016788];methyl indole-3-acetate esterase activity [GO:0080030];methyl jasmonate esterase activity [GO:0080032];methyl salicylate esterase activity [GO:0080031]	20	0	323.31	470	70	70	70	58.2	70	70	68.4	70	O80476	O80476	1440	MES2	Methylesterase 2	59;210;246;263	27;97;191;198;211					112;192;224
293593635559082	294772472381592	294546012878418	294441108703613	jasmonic acid metabolic process [GO:0009694];salicylic acid metabolic process [GO:0009696]	vacuole [GO:0005773]	hydrolase activity [GO:0016787];hydrolase activity, acting on ester bonds [GO:0016788];methyl indole-3-acetate esterase activity [GO:0080030];methyl jasmonate esterase activity [GO:0080032];methyl salicylate esterase activity [GO:0080031]	16	0	88.513	182	45.2	38.8	43	44.9	51	48.7	47.1	45.2	O80477	O80477	1441	MES3	Methylesterase 3	210;252	27;125;186;187;212					49
291231460571289	291909580230713	289995136260986	290477561950684	host response to induction by symbiont of tumor, nodule or growth in host [GO:0080034];NLS-bearing protein import into nucleus [GO:0006607];symbiont intracellular protein transport in host [GO:0030581]	cytosol [GO:0005829];host cell nucleus [GO:0042025];nuclear envelope [GO:0005635];nucleus [GO:0005634]	nuclear import signal receptor activity [GO:0061608];nuclear localization sequence binding [GO:0008139]	34	0	323.31	288	27.3	21.2	22.7	35.3	46.7	22.5	31.6	31.6	O80480	O80480	1442	IMPA4	Importin subunit alpha-4	199;236;293;355;420;425;430;439	17;120;239;248;352;492;495
229521770477295	NaN	233714580535889	210191669464111		plasma membrane [GO:0005886]	magnesium-dependent protein serine/threonine phosphatase activity [GO:0004724];metal ion binding [GO:0046872];protein serine/threonine phosphatase activity [GO:0004722]	4	0	28.06	8	2.3	1.9	4.7	4.2	1.9	4.2	0	0	O80492	O80492	1443	At1g09160	Probable protein phosphatase 2C 5
NaN	238594646453857	264787254333496	269194583892822	exocytosis [GO:0006887];intracellular protein transport [GO:0006886];intra-Golgi vesicle-mediated transport [GO:0006891];plant-type cell wall cellulose biosynthetic process [GO:0052324];Rab protein signal transduction [GO:0032482];regulation of cell growth [GO:0001558];retrograde transport, endosome to Golgi [GO:0042147];retrograde vesicle-mediated transport, Golgi to endoplasmic reticulum [GO:00…	cytosol [GO:0005829];endomembrane system [GO:0012505];endosome [GO:0005768];Golgi apparatus [GO:0005794];Golgi membrane [GO:0000139];membrane [GO:0016020];plasma membrane [GO:0005886];plasmodesma [GO:0009506];trans-Golgi network [GO:0005802];vacuolar membrane [GO:0005774]	GTP binding [GO:0005525];GTPase activity [GO:0003924]	6	0	19.962	38	5.3	5.3	11.1	11.1	11.1	5.8	5.8	5.8	O80501	O80501	1444	RABH1B	Ras-related protein RABH1b
309815540313721	31085880279541	30963752746582	309483776092529	chaperone cofactor-dependent protein refolding [GO:0051085];protein folding [GO:0006457]	chloroplast [GO:0009507];chloroplast envelope [GO:0009941];chloroplast stroma [GO:0009570];cytosol [GO:0005829];mitochondrial matrix [GO:0005759];plastid [GO:0009536]	chaperone binding [GO:0051087];metal ion binding [GO:0046872];protein domain specific binding [GO:0019904];unfolded protein binding [GO:0051082]	13	0	323.31	166	56.8	66.9	66.9	66.9	64.7	66.9	64	64	O80504	O80504	1445	CPN10-2	10 kDa chaperonin 2, chloroplastic	127;129	51;69;78;82;106;130
287623691558838	281262760162354	286308975219727	286902256011963		anchored component of membrane [GO:0031225];anchored component of plasma membrane [GO:0046658];plasmodesma [GO:0009506]	electron transfer activity [GO:0009055];metal ion binding [GO:0046872]	9	0	258.88	151	28.2	30.2	30.2	30.2	28.2	30.2	28.2	20.3	O80517	O80517	1447	At2g44790	Uclacyanin-2	78;106;112	60;72;93;97		86
26363676071167	264571685791016	264981555938721	266653289794922	lipid catabolic process [GO:0016042]	chloroplast stroma [GO:0009570];extracellular region [GO:0005576]	hydrolase activity, acting on ester bonds [GO:0016788]	8	0	13.602	25	12.2	11.4	16.5	12.2	14.6	12.2	16.5	15.1	O80522	O80522	1448	At1g09390	GDSL esterase/lipase At1g09390	243	191
300464820861816	301184253692627	30074951171875	3004270362854	acetyl-CoA biosynthetic process [GO:0006085];lipid metabolic process [GO:0006629]	citrate lyase complex [GO:0009346];cytosol [GO:0005829];extracellular region [GO:0005576]	ATP binding [GO:0005524];ATP citrate synthase activity [GO:0003878]	37	0	323.31	523	59.4	51.9	56.4	56.4	57.8	57.8	57.8	55.7	O80526	O80526	1449	ACLA-3	ATP-citrate synthase alpha chain protein 3	98;163;323;412;418	16;20;58;65;68;86;148;225;256;262;269;413					61;95;158;408
287571315765381	289505481719971	288533496856689	290484066009521		secretory vesicle [GO:0099503]	alcohol dehydrogenase (NAD+) activity [GO:0004022];oxidoreductase activity [GO:0016491];oxidoreductase activity, acting on the CH-OH group of donors, NAD or NADP as acceptor [GO:0016616]	16	0	74.708	122	30.4	24.5	32.9	28.6	30.4	29.8	28.3	23	O80532;Q5PP57	O80532	1450	At1g09490	At1g09490/F14J9_15		44;55;238;306;319		246			305
259090538024902	260603771209717	25824031829834	256987457275391			alcohol dehydrogenase (NAD+) activity [GO:0004022];oxidoreductase activity [GO:0016491];oxidoreductase activity, acting on the CH-OH group of donors, NAD or NADP as acceptor [GO:0016616]	5	0	4.7664	20	16	12.6	12.6	5.8	0	0	0	4.6	O80533	O80533	1451	At1g09500	At1g09500/F14J9_16
244182834625244	246421813964844	251140232086182	250472679138184	methylation [GO:0032259]	mitochondrion [GO:0005739]	methyltransferase activity [GO:0008168]	5	0	6.7843	25	5.9	5.4	2.3	2.3	2.3	4.8	2.3	5.1	O80543	O80543	1452	At1g22800	Putative methyltransferase At1g22800, mitochondrial								103
271673908233643	301204051971436	24510929107666	NaN	negative regulation of transcription, DNA-templated [GO:0045892];regulation of translation [GO:0006417];response to absence of light [GO:0009646];response to carbon starvation [GO:0090549]	cytosol [GO:0005829];nucleus [GO:0005634]	ribosome binding [GO:0043022]	9	0	7.3512	25	1.4	0.9	3.9	0	0	2	1.6	4.5	O80548	O80548	1453	MRF2	MA3 DOMAIN-CONTAINING TRANSLATION REGULATORY FACTOR 2							1
254517078399658	242780284881592	251848011016846	248021297454834	methylation [GO:0032259]	cytosol [GO:0005829]	thiol S-methyltransferase activity [GO:0018708]	4	0	6.8148	24	9.7	9.7	9.7	9.7	9.7	9.7	9.7	9.7	O80562	O80562	1454	HOL2	Probable thiol methyltransferase 1		113
27356575012207	27412561416626	267120094299316	274022674560547	RNA processing [GO:0006396]	nucleus [GO:0005634];ribonucleoprotein complex [GO:1990904]	mRNA binding [GO:0003729]	14	0	31.021	59	11	11	18.9	19.8	4.4	15.8	12.7	16.3	O80567	O80567	1455	LARP6B	La-related protein 6B	297;317	157		321;322
271456928253174	266646518707275	266635665893555	26848762512207	inositol trisphosphate metabolic process [GO:0032957];myo-inositol hexakisphosphate biosynthetic process [GO:0010264]	cytosol [GO:0005829]	ATP binding [GO:0005524];inositol tetrakisphosphate 1-kinase activity [GO:0047325];inositol-1,3,4-trisphosphate 5-kinase activity [GO:0052726];inositol-1,3,4-trisphosphate 6-kinase activity [GO:0052725];magnesium ion binding [GO:0000287]	14	0	53.717	53	23.2	15.8	11.3	24	13.3	5.9	13.3	17.6	O80568	O80568	1456	ITPK4	Inositol 1,3,4-trisphosphate 5/6-kinase 4		487
[truncated: 3,398 more rows]
