# Supplementary material for: Proteome Dynamics of Persulfidation in Leaf Tissue under Light/Dark Conditions and Carbon Deprivation
Source: Antioxidants (Basel). 2023 Mar 23;12(4):789. doi: 10.3390/antiox12040789 (PMC10135009; doi:10.3390/antiox12040789)
Supplement: Supplementary file 1 [file antioxidants-12-00789-s001.zip › Dataset S4.xlsx]

## Sheet: S4_EN_2 REPLICAS
Dataset 4. Identified proteins in the sample set 4 (S4) in at least two independent replicas
LFQ intensity S41	LFQ intensity S42	LFQ intensity S43	LFQ intensity S44	Gene ontology (biological process)	Gene ontology (cellular component)	Gene ontology (molecular function)	Peptides	Q-value	Score	MS/MS count	Sequence coverage S41 [%]	Sequence coverage S42 [%]	Sequence coverage S43 [%]	Sequence coverage S44 [%]	Protein IDs	Majority protein IDs	id	Gene name	Protein name
#!{Type}E	E	E	E	C	C	C	N	N	N	N	N	N	N	N	T	T	T	T	T
#!{C:Group1}LFQ intensity S4	LFQ intensity S4	LFQ intensity S4	LFQ intensity S4
298105697631836	294350757598877	299444732666016	298881778717041	photosynthesis [GO:0015979]	extrinsic component of membrane [GO:0019898];photosystem II oxygen evolving complex [GO:0009654]	calcium ion binding [GO:0005509]	17	0	66.223	100	36.5	33.7	34.9	39.4	A0A178U9N5	A0A178U9N5	1	PPD5	PsbP domain protein (Mog1/PsbP/DUF1795-like photosystem II reaction center PsbP family protein)
272624855041504	274698734283447	272755088806152	274364280700684	cell wall modification [GO:0042545];pectin catabolic process [GO:0045490]		aspartyl esterase activity [GO:0045330];enzyme inhibitor activity [GO:0004857];pectinesterase activity [GO:0030599]	9	0	106.78	60	17	15.4	22.5	15.3	A0A178UA07	A0A178UA07	2	At5g09760	Plant invertase/pectin methylesterase inhibitor superfamily
267776851654053	252776737213135	26298921585083	267714023590088				9	0	31.697	50	39.3	30.1	42.1	38.3	A0A178UE66	A0A178UE66	3	PBS2	Cysteine and histidine-rich domain-containing protein RAR1
20520565032959	208658199310303	207427921295166	22415397644043		cytosol [GO:0005829]	5-diphosphoinositol pentakisphosphate 3-kinase activity [GO:0102092];ATP binding [GO:0005524];diphosphoinositol-pentakisphosphate kinase activity [GO:0033857];inositol heptakisphosphate kinase activity [GO:0000829];inositol hexakisphosphate 1-kinase activity [GO:0052723];inositol hexakisphosphate 3-kinase activity [GO:0052724];inositol hexakisphosphate 5-kinase activity [GO:0000832]	38	0	74.976	143	1.9	2.5	1.3	1	A0A178VEL3	A0A178VEL3	5	AtVIP1	Inositol hexakisphosphate and diphosphoinositol-pentakisphosphate kinase
243349723815918	24543212890625	248229885101318	248445053100586			FMN binding [GO:0010181];oxidoreductase activity [GO:0016491]	4	0.0086572	1.5291	6	3.6	3.6	11.9	5.8	A0A178VMD8	A0A178VMD8	6	HAOX2	Aldolase-type TIM barrel family protein
249889755249023	25020938873291	247653198242188	247351570129395			UDP-glycosyltransferase activity [GO:0008194]	3	0	3.7199	11	5	5	5.3	5	A0A178VRK6	A0A178VRK6	8	At2g30150	UDP-Glycosyltransferase superfamily protein
253043460845947	250764312744141	257628879547119	252066879272461	protein initiator methionine removal [GO:0070084]	cytoplasm [GO:0005737]	metal ion binding [GO:0046872];metalloaminopeptidase activity [GO:0070006]	9	0	4.8987	9	19.9	19.9	23.1	23.1	A0A178VUM7	A0A178VUM7	9	MAP2A	Methionine aminopeptidase 2
261728172302246	265148010253906	264516925811768	265150871276855	RNA metabolic process [GO:0016070]		RNA binding [GO:0003723];sequence-specific DNA binding [GO:0043565];single-stranded DNA binding [GO:0003697]	9	0	14.904	60	14.6	17.8	12.3	10.7	A0A178W0K0	A0A178W0K0	13	At2g37020	Translin family protein
258789539337158	267004146575928	25798526763916	259774055480957		small-subunit processome [GO:0032040]		5	0.0013038	2.3067	4	1.1	2	1.1	1.1	A0A178W3G2	A0A178W3G2	14	At1g69070	Nucleolar-like protein
228198738098145	228398818969727	223379955291748	23094165802002				14	0	60.791	61	2.8	2.8	5.3	2.8	A0A1I9LLC0	A0A1I9LLC0	17	CID4	CTC-interacting domain 4
233121585845947	232365913391113	232460041046143	237670879364014	microtubule nucleation [GO:0007020]	cytoplasm [GO:0005737];microtubule [GO:0005874];microtubule organizing center [GO:0005815];spindle pole [GO:0000922]	gamma-tubulin binding [GO:0043015]	3	0.0033021	2.0431	12	1.1	1.1	1.1	1.1	A0A1I9LLT8	A0A1I9LLT8	20	GCP4	Gamma-tubulin complex component
27169303894043	27448844909668	27249885559082	272933368682861			aspartic-type endopeptidase activity [GO:0004190]	7	0	26.925	74	9	5.9	9	5.9	A0A1I9LM46	A0A1I9LM46	22	At3g51330	Eukaryotic aspartyl protease family protein
308522186279297	303130035400391	30543607711792	307337608337402	carbohydrate metabolic process [GO:0005975]	integral component of membrane [GO:0016021]	beta-galactosidase activity [GO:0004565]	39	0	279.18	242	37.3	31.5	35	33.9	A0A1I9LM56	A0A1I9LM56	23	BGAL2	Beta-galactosidase
286269359588623	288213157653809	288329792022705	290466899871826			RNA binding [GO:0003723]	21	0	120.53	294	21.7	23	23	21.7	A0A1I9LM90	A0A1I9LM90	25	FLK	RNA-binding KH domain-containing protein
NaN	244403781890869	23908390045166	244646339416504	phloem development [GO:0010088]			6	0	11.152	14	0	1.2	1.5	1.2	A0A1I9LMF2	A0A1I9LMF2	27	SEOa	Sieve element occlusion protein
236270065307617	NaN	238066596984863	239925670623779		integral component of membrane [GO:0016021]		1	0.00094429	2.5477	2	20.8	0	20.8	20.8	A0A1I9LMI8	A0A1I9LMI8	29	At3g23450	Transmembrane protein
256547718048096	259965591430664	258828773498535	25997486114502	autophagy [GO:0006914];protein transport [GO:0015031]	cytoplasm [GO:0005737]	cysteine-type peptidase activity [GO:0008234]	10	0	60.132	50	12.8	14.6	12.8	12.8	A0A1I9LMQ9	A0A1I9LMQ9	32	At3g59950	Cysteine protease
2486301612854	249208431243896	248699951171875	251975688934326	de-etiolation [GO:0009704];response to far red light [GO:0010218];seed germination [GO:0009845]	integral component of membrane [GO:0016021];perinuclear region of cytoplasm [GO:0048471]	hydrolase activity, acting on carbon-nitrogen (but not peptide) bonds [GO:0016810]	3	0.0054093	1.7957	5	7.5	4.8	4.8	4.8	A0A1I9LN01	A0A1I9LN01	33	LAF3	Protein LONG AFTER FAR-RED 3
285793151855469	290375556945801	291884384155273	291008682250977			RNA binding [GO:0003723]	11	0	34.628	54	16.4	20.5	20.8	16.4	A0A1I9LN63	A0A1I9LN63	34	At3g16230	Putative eukaryotic LigT
240557308197021	228061103820801	240657081604004	239255142211914	nucleotide-sugar metabolic process [GO:0009225]		dTDP-glucose 4,6-dehydratase activity [GO:0008460]	52	0	102.06	64	18.7	18	24.7	20.7	A0A1I9LN83	A0A1I9LN83	36	RHM3	Rhamnose biosynthesis 3
NaN	NaN	231462059020996	232237758636475	metal ion transport [GO:0030001]		metal ion binding [GO:0046872]	28	0	3.8927	12	79.3	82.9	92.8	92.8	A0A1I9LNC0	A0A1I9LNC0	37	CCH	Copper chaperone
290392036437988	292541732788086	29295352935791	293059768676758				15	0	80.458	134	35.5	42.4	62.4	57.3	A0A1I9LNQ7	A0A1I9LNQ7	38	At3g02510	Regulator of chromosome condensation (RCC1) family protein
298448162078857	300923233032227	299420967102051	301345500946045				20	0	131.46	240	53.5	52	52.3	50.5	A0A1I9LNT2	A0A1I9LNT2	39	SDR1	NAD(P)-binding Rossmann-fold superfamily protein
299500465393066	29972131729126	299276180267334	296789722442627				8	0	62.724	165	34.4	34.4	34.4	34.4	A0A1I9LNZ1	A0A1I9LNZ1	40	At3g07470	Uncharacterized protein
334317893981934	334368858337402	334220428466797	334674530029297				22	0	43.56	43	0.5	0.5	0.5	1	A0A1I9LP28	A0A1I9LP28	41	At3g06530	ARM repeat superfamily protein
277237739562988	276334648132324	275431098937988	277128620147705	calcium-mediated signaling [GO:0019722]		calcium ion binding [GO:0005509]	8	0	76.319	90	31.8	33.6	31.8	33.6	A0A1I9LPJ2	A0A1I9LPJ2	42	CAM7	Calmodulin
250676364898682	24351713180542	235853157043457	NaN				10	0	12.992	13	1.7	1.5	3.3	0	A0A1I9LPW3	A0A1I9LPW3	44	At3g04490	Exportin-4 protein
250298538208008	263365573883057	265422973632813	266335334777832				27	0	159.12	85	1.7	1.5	1.1	1.5	A0A1I9LPZ1	A0A1I9LPZ1	45	At3g50370	Uncharacterized protein
216823043823242	216188087463379	199114036560059	221174354553223			serine-type endopeptidase activity [GO:0004252]	45	0	291.84	257	1.1	0.8	2.1	2.1	A0A1I9LPZ9	A0A1I9LPZ9	47	DEG7	DegP protease 7
321618881225586	322460670471191	323112449645996	323741493225098	cellular response to DNA damage stimulus [GO:0006974]		ATP binding [GO:0005524];protein serine/threonine kinase activity [GO:0004674]	6	0	3.4473	5	1.6	1.6	1.6	1.6	A0A1I9LQ79	A0A1I9LQ79	49	ATM	Serine/Threonine-kinase ATM-like protein
375094833374023	368684349060059	36863597869873	367519721984863	carbon utilization [GO:0015976]		carbonate dehydratase activity [GO:0004089];zinc ion binding [GO:0008270]	58	0	323.31	2321	99.6	99.6	99.6	98.5	A0A1I9LQB3	A0A1I9LQB3	50	CA1	Carbonic anhydrase
276889915466309	286393070220947	281010932922363	304353942871094			ATP binding [GO:0005524];helicase activity [GO:0004386]	4	0	3.2308	58	1.1	1.1	1.1	0.6	A0A1I9LQH7	A0A1I9LQH7	52	PIE1	SNF2 domain-containing protein / helicase domain-containing protein
24965124130249	250465183258057	252185230255127	247843170166016				5	0	4.1228	19	15.8	11.3	5.4	5.4	A0A1I9LQU5	A0A1I9LQU5	56	FIB4	Plastid-lipid associated protein PAP / fibrillin family protein
27134672164917	272686557769775	270499897003174	272497959136963			peptidyl-prolyl cis-trans isomerase activity [GO:0003755]	9	0	24.962	51	31	26.2	27.3	22.5	A0A1I9LRJ6	A0A1I9LRJ6	61	At3g60370	Peptidylprolyl isomerase
264827461242676	266845855712891	26474925994873	271704502105713	cell wall modification [GO:0042545];pectin catabolic process [GO:0045490]	integral component of membrane [GO:0016021]	aspartyl esterase activity [GO:0045330];enzyme inhibitor activity [GO:0004857];pectinesterase activity [GO:0030599]	3	0	5.0873	13	5.8	5.8	5.8	5.8	A0A1I9LRM8	A0A1I9LRM8	62	At3g49220	Pectinesterase
254332618713379	254279022216797	258363170623779	260385246276855	nuclear export [GO:0051168]	nucleus [GO:0005634]		14	0	18.154	62	0.5	0.5	1.3	0.5	A0A1I9LRW7	A0A1I9LRW7	63	HST	ARM repeat superfamily protein
NaN	257883052825928	NaN	239061889648438	NAD metabolic process [GO:0019674];NADP biosynthetic process [GO:0006741]	integral component of membrane [GO:0016021]	NAD+ kinase activity [GO:0003951]	12	0	18.96	34	0	1.2	0	1.5	A0A1I9LRY1	A0A1I9LRY1	64	NADK1	NAD kinase 1
224483909606934	226935977935791	229928779602051	233828449249268			nucleic acid binding [GO:0003676]	11	0	38.539	49	6.2	6.2	3.9	3.9	A0A1I9LSC2	A0A1I9LSC2	66	At3g07030	Alba DNA/RNA-binding protein
276736431121826	263224086761475	22410436630249	264273281097412			zinc ion binding [GO:0008270]	143	0	323.31	593	0.2	0.5	0.5	0.6	A0A1I9LSK3	A0A1I9LSK3	67	BIG	Auxin transport protein (BIG)
252242774963379	254188289642334	252771415710449	254076595306396	pectin catabolic process [GO:0045490]		metal ion binding [GO:0046872];pectate lyase activity [GO:0030570]	3	0	6.5644	6	10.7	10.7	10.7	5.2	A0A1I9LSL6	A0A1I9LSL6	68	At3g07010	Pectate lyase
291391448974609	292763080596924	292854881286621	293353691101074		extracellular region [GO:0005576]		21	0	172.86	191	54.2	43.7	55.9	58.4	A0A1I9LT21	A0A1I9LT21	70	EXLA1	Expansin-like A1
263854656219482	263508892059326	264949703216553	261994781494141				10	0	7.6887	44	7	6.9	8.3	7.2	A0A1I9LT48	A0A1I9LT48	72	CHUP1	Hydroxyproline-rich glycoprotein family protein
245367069244385	242370281219482	239816341400146	238493824005127			ligase activity [GO:0016874]	2	0	3.5848	7	3.4	3.4	3.4	3.4	A0A1I9LTH3	A0A1I9LTH3	75	At3g10250	Histidine-tRNA ligase
276905250549316	279310607910156	278110904693604	280345420837402	metabolic process [GO:0008152]	membrane [GO:0016020]	calcium ion binding [GO:0005509];mannosyl-oligosaccharide 1,2-alpha-mannosidase activity [GO:0004571]	12	0	40.694	93	13.8	14.3	10.9	14	A0A1P8AM79	A0A1P8AM79	78	MNS3	alpha-1,2-Mannosidase
278326759338379	280757160186768	278864040374756	277054328918457	protein retention in Golgi apparatus [GO:0045053];protein targeting to vacuole [GO:0006623]	extrinsic component of membrane [GO:0019898]		6	0	4.3005	33	0.8	0.5	0.7	0.7	A0A1P8AMQ1	A0A1P8AMQ1	79	At1g48090	Calcium-dependent lipid-binding family protein
228380546569824	235694103240967	224801292419434	234294357299805		integral component of membrane [GO:0016021]	oxidoreductase activity, acting on the aldehyde or oxo group of donors, disulfide as acceptor [GO:0016624]	20	0	194.94	58	13.7	12.6	7.4	7.4	A0A1P8AMS1	A0A1P8AMS1	80	At1g21400	Thiamin diphosphate-binding fold (THDP-binding) superfamily protein
240979633331299	249206619262695	247234344482422	245105075836182	protein transport [GO:0015031]			2	0.00019257	2.8778	2	7.1	7.1	7.1	7.1	A0A1P8ANA1	A0A1P8ANA1	83	At1g25420	Regulator of Vps4 activity in the MVB pathway protein
281315841674805	275512752532959	28054292678833	274967842102051				8	0	5.5928	39	9	7.2	9	7.2	A0A1P8ANB4	A0A1P8ANB4	84	SKIP16	SKP1/ASK-interacting protein 16
249460582733154	243621215820313	NaN	243741130828857		integral component of membrane [GO:0016021]	ATP binding [GO:0005524];protein kinase activity [GO:0004672]	3	0	4.0417	18	1.9	1.9	1	1.9	A0A1P8ANE5	A0A1P8ANE5	85	At1g56145	Leucine-rich repeat transmembrane protein kinase
270064601898193	271398525238037	267329864501953	257545795440674	plant-type cell wall organization [GO:0009664]	cell wall [GO:0005618];extracellular region [GO:0005576];membrane [GO:0016020]		5	0	14.659	32	10.9	24.4	15	17.6	A0A1P8APG3	A0A1P8APG3	87	EXPA11	Expansin
311669254302979	31073356628418	310763549804688	311171245574951		extracellular space [GO:0005615]		36	0	323.31	524	64.6	66.5	61	56.2	A0A1P8API2	A0A1P8API2	89	SERPIN1	Serine protease inhibitor (SERPIN) family protein
NaN	242885570526123	240074443817139	NaN				5	0	6.4111	5	0	7.3	3	0	A0A1P8APQ0	A0A1P8APQ0	90	CW7	CW7
344053382873535	337911033630371	339772415161133	344715766906738	glucose metabolic process [GO:0006006]	integral component of membrane [GO:0016021]	NAD binding [GO:0051287];NADP binding [GO:0050661];oxidoreductase activity, acting on the aldehyde or oxo group of donors, NAD or NADP as acceptor [GO:0016620]	59	0	323.31	584	74.4	74.4	74.4	73.9	A0A1P8APR6	A0A1P8APR6	91	GAPA-2	Glyceraldehyde-3-phosphate dehydrogenase
252756519317627	254172534942627	249955883026123	249517593383789			acyl-CoA hydrolase activity [GO:0047617]	5	0	4.3916	38	13.4	13.4	13.4	13.4	A0A1P8APX5	A0A1P8APX5	96	At1g04290	Thioesterase superfamily protein
24618236541748	246291751861572	NaN	231106338500977	regulation of transcription, DNA-templated [GO:0006355]		transcription coregulator activity [GO:0003712]	4	0.0032919	2.0073	15	0.9	0.9	0	1.3	A0A1P8AQ03;REV__Q7XJE6	A0A1P8AQ03	98	NRB4	Mediator of RNA polymerase II transcription subunit 15a-like protein
224968967437744	236306762695313	239430637359619	238073482513428			calcium ion binding [GO:0005509]	35	0	211.45	151	2.3	5.8	6.7	4.3	A0A1P8AQ08	A0A1P8AQ08	99	At1g21630	Calcium-binding EF hand family protein
25107931137085	242532081604004	246109924316406	252542896270752				3	0	38.687	23	10.8	10.8	10.8	10.8	A0A1P8AQ22	A0A1P8AQ22	100	VAD1	GRAM domain family protein
270542411804199	271220855712891	272478046417236	27214750289917	NAD metabolic process [GO:0019674];NADP biosynthetic process [GO:0006741]		NAD+ kinase activity [GO:0003951]	9	0	22.982	105	24.6	19	22.2	18.1	A0A1P8AQ52	A0A1P8AQ52	101	NADK3	NAD(H) kinase 3
NaN	245901222229004	NaN	246501502990723			ATP binding [GO:0005524];helicase activity [GO:0004386];nucleic acid binding [GO:0003676]	4	0.00019135	2.7826	10	0	1.4	1.9	4.4	A0A1P8AQ84	A0A1P8AQ84	102	EMB3108	DEA(D/H)-box RNA helicase family protein
236296768188477	244825305938721	247981796264648	254324016571045	mRNA processing [GO:0006397]	nucleus [GO:0005634]	5'-3' exoribonuclease activity [GO:0004534];nucleic acid binding [GO:0003676];zinc ion binding [GO:0008270]	17	0	59.782	78	1.2	1.2	3.5	5.6	A0A1P8AQR8	A0A1P8AQR8	103	XRN4	5'-3' exoribonuclease
285584449768066	286401348114014	284616241455078	286947479248047			ADP binding [GO:0043531]	3	0.0060987	1.7106	45	2.5	2.5	2.1	2.1	A0A1P8AQY6	A0A1P8AQY6	104	RFL1	RPS5-like 1
27255838394165	265429763793945	269424610137939	261490516662598				20	0	51.871	57	1.4	1.4	1.4	1.4	A0A1P8AQY7	A0A1P8AQY7	105	GC5	Golgin Putative 5
21635290145874	NaN	NaN	218270645141602			metal ion binding [GO:0046872]	1	0	4.2289	3	4.5	0	0	4.5	A0A1P8AQZ1	A0A1P8AQZ1	106	CPSF30	Cleavage and polyadenylation specificity factor 30
NaN	NaN	251259708404541	250451030731201				3	0	3.2783	5	0	0	1.3	1.3	A0A1P8ARG8	A0A1P8ARG8	110	At1g18950	DDT domain superfamily
NaN	2361110496521	236602516174316	229281196594238	biosynthetic process [GO:0009058]		catalytic activity [GO:0003824]	2	0	4.3897	9	0	4.1	7.6	4.1	A0A1P8ARL5	A0A1P8ARL5	111	At1g03210	Phenazine biosynthesis PhzC/PhzF protein
189218997955322	198098945617676	197035217285156	203284950256348	mRNA processing [GO:0006397]		RNA binding [GO:0003723]	12	0	116.34	39	1.7	1.7	1.7	1.7	A0A1P8ARN1	A0A1P8ARN1	112	At1g60200	Splicing factor PWI domain-containing protein / RNA recognition motif (RRM)-containing protein
226972942352295	NaN	227944164276123	228363418579102			metal ion binding [GO:0046872]	2	0.0052337	1.8084	2	5.7	0	5.7	5.7	A0A1P8ARX2	A0A1P8ARX2	113	TAF15	TBP-associated factor 15
233567600250244	NaN	244421501159668	NaN	DNA recombination [GO:0006310];double-strand break repair via nonhomologous end joining [GO:0006303];telomere maintenance [GO:0000723]	Ku70:Ku80 complex [GO:0043564]	ATP binding [GO:0005524];damaged DNA binding [GO:0003684];DNA helicase activity [GO:0003678];telomeric DNA binding [GO:0042162]	9	0	38.351	37	1.2	0	1.2	0	A0A1P8ASX4	A0A1P8ASX4	116	KU80	ATP-dependent DNA helicase 2 subunit KU80
257228870391846	267089881896973	273693618774414	272541275024414				16	0	12.797	38	0.5	0.5	0.5	0.2	A0A1P8AT16	A0A1P8AT16	117	SPI	BEACH-DOMAIN HOMOLOG A1
243519153594971	248183631896973	247492942810059	246617202758789	regulation of translational initiation [GO:0006446];translational initiation [GO:0006413]	eukaryotic translation initiation factor 2B complex [GO:0005851]	translation initiation factor activity [GO:0003743]	4	0	4.2758	15	2	2	2	2	A0A1P8AT59	A0A1P8AT59	118	At1g53900	Eukaryotic translation initiation factor 2B (eIF-2B) family protein
241547584533691	244063930511475	22870662689209	246465835571289	positive regulation of kinase activity [GO:0033674];regulation of translation [GO:0006417]		protein kinase binding [GO:0019901];protein kinase regulator activity [GO:0019887];ribosome binding [GO:0043022]	105	0	323.31	475	1	1	1.4	1.6	A0A1P8AT97	A0A1P8AT97	119	ILA	ILITYHIA
286164932250977	286610527038574	28477575302124	283060855865479	microtubule-based movement [GO:0007018]		ATP binding [GO:0005524];microtubule binding [GO:0008017];microtubule motor activity [GO:0003777]	6	0	6.1011	19	0.9	0.9	2.2	2.2	A0A1P8ATA6	A0A1P8ATA6	120	At1g63640	p-loop nucleoside triphosphate hydrolases superfamily protein with CH (Calponin Homology) domain-containing protein
353398323059082	352951202392578	35344799041748	353319473266602	rRNA processing [GO:0006364]	cytosol [GO:0005829]	catalytic activity [GO:0003824];RNA binding [GO:0003723]	65	0	323.31	1574	77	76	77	77	A0A1P8ATL2	A0A1P8ATL2	123	CRB	Chloroplast RNA binding protein
310383930206299	309484462738037	310049743652344	311472835540771		cytosol [GO:0005829]	serine-type endopeptidase activity [GO:0004252];serine-type exopeptidase activity [GO:0070008]	55	0	323.31	695	52.4	49.4	54.9	47.8	A0A1P8ATN7	A0A1P8ATN7	124	At1g50380	Prolyl oligopeptidase family protein
271342792510986	278928451538086	27618558883667	278336429595947			RNA binding [GO:0003723]	9	0	27.628	68	21.3	21.3	20.7	22.9	A0A1P8ATW8	A0A1P8ATW8	125	At1g53120	RNA-binding S4 domain-containing protein
283241443634033	287819747924805	287992172241211	287559223175049	retrograde transport, endosome to Golgi [GO:0042147]	cytosol [GO:0005829];GARP complex [GO:0000938]		30	0	127.39	108	2.9	2.9	1.3	1.6	A0A1P8ATX5	A0A1P8ATX5	126	HIT1	Membrane trafficking VPS53 family protein
295588474273682	296938171386719	295228099822998	296695766448975			thiosulfate sulfurtransferase activity [GO:0004792]	18	0	118.19	195	64.3	50.8	63.2	69.5	A0A1P8AU99	A0A1P8AU99	128	RDH2	Rhodanese homologue 2
NaN	238348960876465	NaN	236300086975098			GTP binding [GO:0005525];hydrolase activity [GO:0016787]	4	0.0031216	2.0528	8	0	3.2	0	3.2	A0A1P8AUC4	A0A1P8AUC4	129	AIG1	p-loop containing nucleoside triphosphate hydrolases superfamily protein
286264495849609	290893707275391	290722961425781	291982841491699				6	0	11.346	35	2.7	2.7	2.7	1.3	A0A1P8AUF8	A0A1P8AUF8	131	At1g23180	ARM repeat superfamily protein
284916725158691	282216796875	284448223114014	287359580993652	leucine biosynthetic process [GO:0009098]		3-isopropylmalate dehydrogenase activity [GO:0003862];magnesium ion binding [GO:0000287];NAD binding [GO:0051287]	31	0	145.97	106	51.1	51.6	51.3	48	A0A1P8AUM8	A0A1P8AUM8	135	IMD3	3-isopropylmalate dehydrogenase
227139148712158	NaN	228441219329834	NaN				12	0	37.023	23	0.9	0	0.9	1.8	A0A1P8AUP4	A0A1P8AUP4	136	At1g27430	GYF domain-containing protein
NaN	238547172546387	238254165649414	238040027618408	protein folding [GO:0006457]		ATP binding [GO:0005524]	2	0.003647	1.9513	6	0	8.5	8.5	8.5	A0A1P8AUX7	A0A1P8AUX7	138	CPN10	Chaperonin 10
275442905426025	276395492553711	NaN	NaN	nucleus organization [GO:0006997]	nucleus [GO:0005634]		2	0.0065989	1.6286	12	0.8	1.1	0	0	A0A1P8AUZ9	A0A1P8AUZ9	140	LINC2	Nuclear matrix constituent protein-like protein
295170936584473	293480911254883	295743064880371	29457088470459	lipid metabolic process [GO:0006629]		aspartic-type endopeptidase activity [GO:0004190]	31	0	323.31	428	35.8	29.6	36.6	39.5	A0A1P8AV08	A0A1P8AV08	141	APA1	Aspartic proteinase A1
251126308441162	246203651428223	254093761444092	256981906890869		ribosome [GO:0005840]	rRNA binding [GO:0019843];structural constituent of ribosome [GO:0003735];translation elongation factor activity [GO:0003746]	3	0	6.2972	11	10	10.4	7.4	7.4	A0A1P8AV66	A0A1P8AV66	142	At1g64510	Translation elongation factor EF1B/ribosomal protein S6 family protein
250392990112305	217215480804443	232019023895264	233325157165527	intracellular protein transport [GO:0006886];vesicle-mediated transport [GO:0016192]	COPI-coated vesicle membrane [GO:0030663];Golgi membrane [GO:0000139];membrane coat [GO:0030117]	structural molecule activity [GO:0005198]	58	0	323.31	343	4	2.2	8.1	3.1	A0A1P8AV73	A0A1P8AV73	143	At1g52360	Coatomer subunit beta'
297725353240967	296753425598145	290099868774414	293050861358643	endonucleolytic cleavage of tricistronic rRNA transcript (SSU-rRNA, 5.8S rRNA, LSU-rRNA) [GO:0000479];maturation of SSU-rRNA from tricistronic rRNA transcript (SSU-rRNA, 5.8S rRNA, LSU-rRNA) [GO:0000462]	90S preribosome [GO:0030686];nucleus [GO:0005634]	GTP binding [GO:0005525];GTPase activity [GO:0003924];U3 snoRNA binding [GO:0034511]	7	0	4.122	34	2.4	2.4	2.4	2.4	A0A1P8AVE9	A0A1P8AVE9	145	At1g06720	p-loop containing nucleoside triphosphate hydrolases superfamily protein
255287418365479	25554557800293	NaN	266039943695068				7	0.0020348	2.1783	9	5.6	2.1	0	2.1	A0A1P8AW11	A0A1P8AW11	149	ATG18H	Autophagy 18h-like protein
241202068328857	239700050354004	23870325088501	237907428741455	microtubule severing [GO:0051013]	cytoplasm [GO:0005737];katanin complex [GO:0008352];microtubule [GO:0005874]	microtubule binding [GO:0008017]	2	0.0022157	2.1462	6	1	1	1	1	A0A1P8AW69	A0A1P8AW69	151	At1g11160	Katanin p80 WD40 repeat-containing subunit B1 homolog
NaN	229878578186035	NaN	223620681762695				17	0	52.025	64	0	4	0	1.9	A0A1P8AW83;Q9LDL7	A0A1P8AW83	152	SCL5	Scarecrow-like 5
264318294525146	248372077941895	254419612884521	258368721008301	phosphatidylinositol phosphorylation [GO:0046854];phosphatidylinositol-mediated signaling [GO:0048015]		kinase activity [GO:0016301]	25	0	61.416	88	2.4	2.8	1.4	2.4	A0A1P8AWA3	A0A1P8AWA3	153	ATPI4K ALPHA	Phosphatidylinositol 3-and 4-kinase family protein
253128871917725	259806976318359	256526126861572	256702823638916		chloroplast [GO:0009507]	ATP binding [GO:0005524];hydrolase activity [GO:0016787]	7	0	4.8324	21	6.1	8.3	6.1	7	A0A1P8AWP1	A0A1P8AWP1	157	At1g73170	p-loop containing nucleoside triphosphate hydrolases superfamily protein
252361164093018	252780284881592	254594841003418	253394985198975				7	0	4.8432	8	18.8	13.2	11.5	17.7	A0A1P8AWP9	A0A1P8AWP9	158	At1g31500	DNAse I-like superfamily protein
250626220703125	252619113922119	246702823638916	24870418548584				5	0	8.1764	27	11.1	3.3	3.3	3.3	A0A1P8AWV1	A0A1P8AWV1	162	YUP8H12R.14	Nitrobindin heme-binding domain protein
3355224609375	334710922241211	335634269714355	335939025878906				48	0	323.31	964	70.6	68.9	70.6	72	A0A1P8AWX3;O48705	A0A1P8AWX3	163	At1g33590	Leucine-rich repeat (LRR) family protein
264432735443115	261579608917236	260041027069092	264751567840576			sirohydrochlorin cobaltochelatase activity [GO:0016852]	5	0	16.361	28	25.5	25.5	36.1	30.6	A0A1P8AWY5	A0A1P8AWY5	164	SIRB	Sirohydrochlorin ferrochelatase B
270023880004883	274704170227051	271128692626953	275001335144043		chloroplast [GO:0009507]		6	0	23.932	39	26.8	17.9	17.9	22.3	A0A1P8AX61	A0A1P8AX61	166	At2g01755	Uncharacterized protein
269449195861816	269001197814941	266604423522949	272370834350586	DNA repair [GO:0006281]		class I DNA-(apurinic or apyrimidinic site) endonuclease activity [GO:0140078];DNA binding [GO:0003677];endonuclease activity [GO:0004519];metal ion binding [GO:0046872]	5	0	8.3443	33	7.9	7.9	7.9	7	A0A1P8AX84	A0A1P8AX84	167	ARP	DNA-(apurinic or apyrimidinic site) lyase
219140777587891	226505546569824	218446407318115	227971897125244	proteasome assembly [GO:0043248]		molecular adaptor activity [GO:0060090]	62	0	289.7	243	1.5	2.6	1.5	1.5	A0A1P8AX98	A0A1P8AX98	168	At2g26780	ARM repeat superfamily protein
250606460571289	250654201507568	251630001068115	253679637908936				4	0.00038234	2.7554	17	8	3.8	5.7	6.1	A0A1P8AXA5	A0A1P8AXA5	169	MEE18	Maternal effect embryo arrest 18
262437973022461	260091114044189	2603147315979	256127643585205			ATP binding [GO:0005524];helicase activity [GO:0004386];nucleic acid binding [GO:0003676]	9	0	24.185	57	6.6	7.9	6.6	2.6	A0A1P8AXM2	A0A1P8AXM2	170	At2g35920	RNA helicase family protein
296679706573486	297132225036621	29802303314209	297240657806396	NAD biosynthetic process [GO:0009435]		nicotinate phosphoribosyltransferase activity [GO:0004516];nicotinate-nucleotide diphosphorylase (carboxylating) activity [GO:0004514]	29	0	133.78	285	41.7	41.9	41.7	49.1	A0A1P8AXW4	A0A1P8AXW4	172	NAPRT2	Nicotinate phosphoribosyltransferase
239028816223145	230510578155518	215932731628418	217669277191162	translation [GO:0006412]	ribosome [GO:0005840]	structural constituent of ribosome [GO:0003735]	38	0	263.13	301	18.4	5.5	10.6	4.1	A0A1P8AY36	A0A1P8AY36	174	At2g34480	Ribosomal protein L18ae/LX family protein
236911506652832	240745544433594	237809677124023	238335456848145				3	0	3.2767	17	7.8	3.1	6.3	6.3	A0A1P8AY74	A0A1P8AY74	175	Basic Proline-rich Protein 1	Flocculation FLO11-like protein
227244243621826	232755451202393	228871784210205	NaN	regulation of transcription, DNA-templated [GO:0006355]		histone binding [GO:0042393]	3	0	4.3345	9	7.5	7.5	11.4	3.9	A0A1P8AYM4	A0A1P8AYM4	178	AL6	Alfin-like 6
287909164428711	300551719665527	301685390472412	288301391601563				12	0	62.508	85	37.5	37.8	37.5	37.5	A0A1P8AYM6	A0A1P8AYM6	179	At2g29320	NAD(P)-binding Rossmann-fold superfamily protein
259976577758789	255703372955322	260457897186279	261561870574951	intracellular protein transport [GO:0006886];vesicle-mediated transport [GO:0016192]	clathrin adaptor complex [GO:0030131]		8	0	33.699	32	4.4	2.3	6.5	2.3	A0A1P8AYQ6	A0A1P8AYQ6	180	At2g20790	Clathrin adaptor complexes medium subunit family protein
NaN	NaN	262659397125244	272704391479492	protein secretion [GO:0009306]	integral component of plasma membrane [GO:0005887]		1	0.004717	1.8704	2	0.4	0	0.4	0.4	A0A1P8AYW3	A0A1P8AYW3	181	emb2410	Embryo defective 2410
311198482513428	311787242889404	311797332763672	313690605163574	protoporphyrinogen IX biosynthetic process [GO:0006782];uroporphyrinogen III biosynthetic process [GO:0006780]		uroporphyrinogen-III synthase activity [GO:0004852]	24	0	233.65	251	52.5	53.2	52.2	43.8	A0A1P8AZK1	A0A1P8AZK1	185	HEMD	Uroporphyrinogen-III synthase
25048807144165	249791069030762	249053173065186	246341152191162		integral component of membrane [GO:0016021]		5	0	5.2472	7	4.5	4.8	11.6	10.9	A0A1P8AZP4	A0A1P8AZP4	186	TBL45	TRICHOME BIREFRINGENCE-LIKE 45
NaN	222954120635986	223855075836182	234120922088623		nucleus [GO:0005634]	ATP binding [GO:0005524]	11	0	13.459	40	0.9	1.6	1.6	2.5	A0A1P8AZP6	A0A1P8AZP6	187	PKL	Chromatin remodeling factor CHD3 (PICKLE)
287785320281982	279444160461426	287731018066406	NaN		nucleus [GO:0005634]	DNA-binding transcription factor activity [GO:0003700];sequence-specific DNA binding [GO:0043565]	1	0.00038256	2.7661	6	6	6	6	0	A0A1P8AZP8	A0A1P8AZP8	188	WRKY55	WRKY DNA-binding protein 55
24083833694458	247135047912598	241405544281006	246645431518555			hydrolase activity [GO:0016787]	4	0	19.434	10	3.1	5.3	3.1	3.1	A0A1P8AZZ0	A0A1P8AZZ0	190	At2g44970	Alpha/beta-Hydrolases superfamily protein
244614524841309	242135639190674	241242370605469	251141014099121	methylation [GO:0032259]		methyltransferase activity [GO:0008168]	3	0.0011261	2.4162	10	3.7	3.7	3.7	3.1	A0A1P8B0Q8	A0A1P8B0Q8	191	At2g26200	Methyltransferase-like protein
24780366897583	NaN	253354835510254	NaN			catalytic activity [GO:0003824]	4	0	7.4238	9	1.1	0	1.1	0	A0A1P8B0W4	A0A1P8B0W4	192	PLDBETA1	Phospholipase D beta 1
244507961273193	NaN	25140905380249	253673629760742			DNA binding [GO:0003677];metal ion binding [GO:0046872]	9	0	7.7672	32	0.6	0	1.1	1.1	A0A1P8B1D0	A0A1P8B1D0	195	NERD	GW repeat-and PHD finger-containing protein NERD
248386516571045	NaN	24181848526001	24099889755249				15	0	7.3051	34	1.4	0	1.1	0.8	A0A1P8B1I9	A0A1P8B1I9	197	At2g25730	Zinc finger FYVE domain protein
278271141052246	280207805633545	280990371704102	279354515075684			ureidoglycolate hydrolase activity [GO:0004848]	6	0	46.578	55	23.8	21.3	23.8	23.8	A0A1P8B223	A0A1P8B223	200	At2g35820	Ureidoglycolate hydrolase
30445592880249	308094654083252	299905071258545	307155494689941			peptidyl-prolyl cis-trans isomerase activity [GO:0003755]	16	0	215.21	217	49.7	67.1	49.1	49.1	A0A1P8B252	A0A1P8B252	201	At2g43560	Peptidylprolyl isomerase
NaN	235471019744873	243334045410156	NaN			hydrolase activity [GO:0016787]	16	0	82.805	48	0	8	8	0	A0A1P8B2T3	A0A1P8B2T3	207	At2g32150	Haloacid dehalogenase-like hydrolase (HAD) superfamily protein
221277656555176	226062316894531	NaN	216337375640869				29	0	16.624	16	38.5	35.8	29.4	34.5	A0A1P8B345	A0A1P8B345	209	UXS6	UDP-XYL synthase 6
263554668426514	264730682373047	265309314727783	2665212059021	intracellular protein transport [GO:0006886];vesicle-mediated transport [GO:0016192]	clathrin adaptor complex [GO:0030131]		40	0	27.726	54	10.1	11.4	10.1	10.9	A0A1P8B3B6	A0A1P8B3B6	210	At4g23460	Beta-adaptin-like protein
267109603881836	263337287902832	268446979522705	268418216705322	signal transduction [GO:0007165]		ADP binding [GO:0043531]	23	0	19.189	61	8.2	6.5	7.2	8.9	A0A1P8B3F3	A0A1P8B3F3	212	RPP5	Disease resistance protein (TIR-NBS-LRR class) family
259873065948486	25770393371582	260033092498779	261392669677734	response to abscisic acid [GO:0009737]			4	0	3.9966	8	3.1	3.1	3.1	3.1	A0A1P8B3K6	A0A1P8B3K6	213	At4g25580	CAP160 protein
273522872924805	264541263580322	273518657684326	272751541137695		endoplasmic reticulum membrane [GO:0005789];integral component of membrane [GO:0016021]	flavin adenine dinucleotide binding [GO:0050660];FMN binding [GO:0010181];NADP binding [GO:0050661];NADPH-hemoprotein reductase activity [GO:0003958]	18	0	24.915	74	12.7	13.4	13.7	8.4	A0A1P8B3S1	A0A1P8B3S1	215	ATR2	NADPH--cytochrome P450 reductase
29862720489502	298611526489258	296773262023926	297296848297119	carbohydrate metabolic process [GO:0005975]		hydrolase activity, hydrolyzing O-glycosyl compounds [GO:0004553]	21	0	323.31	588	58.4	42.2	47.3	39	A0A1P8B3U2	A0A1P8B3U2	216	At4g16260	Glycosyl hydrolase superfamily protein
251752376556396	252324981689453	2519140625	252539653778076				5	0	5.8976	26	16.6	17.1	16.1	22.6	A0A1P8B3Z7	A0A1P8B3Z7	217	RRP41L	3'-5'-exoribonuclease family protein
252371006011963	256880855560303	255092697143555	258129634857178				3	0	5.007	20	8	8	8	5.6	A0A1P8B441	A0A1P8B441	219	At4g15450	Senescence/dehydration-associated protein-like protein
315119686126709	315355186462402	315344524383545	316746768951416	protein import [GO:0017038];protein targeting [GO:0006605]	membrane [GO:0016020]	ATP binding [GO:0005524]	88	0	323.31	867	57.6	56	53.2	54.8	A0A1P8B485	A0A1P8B485	222	AGY1	Protein translocase subunit SecA
248041019439697	246664943695068	243505687713623	242134895324707	transcription, DNA-templated [GO:0006351]		chromatin binding [GO:0003682]	6	0.0052365	1.8158	21	4.1	4.1	3.3	5.5	A0A1P8B497	A0A1P8B497	223	At4g11560	Bromo-adjacent homology (BAH) domain-containing protein
250816822052002	250346050262451	251744384765625	252657794952393		90S preribosome [GO:0030686];nucleolus [GO:0005730];small-subunit processome [GO:0032040]		7	0.0057627	1.7656	14	0.3	0.3	0.3	0.3	A0A1P8B4E4	A0A1P8B4E4	224	At4g30990	ARM repeat superfamily protein
NaN	250463943481445	253678646087646	253889656066895			ATP binding [GO:0005524];hydrolase activity [GO:0016787];protein kinase activity [GO:0004672]	3	0.0043628	1.8973	5	0	3	1.8	1.8	A0A1P8B5B9	A0A1P8B5B9	229	At4g31230	Kinase with adenine nucleotide alpha hydrolases-like domain-containing protein
243639259338379	244949703216553	242376842498779	NaN			palmitoyl hydrolase activity [GO:0098599]	2	0.0067712	1.6213	5	3.2	3.2	3.2	0	A0A1P8B5G7	A0A1P8B5G7	230	At4g17480	Alpha/beta-Hydrolases superfamily protein
256882724761963	NaN	255182723999023	25435489654541			hydrolase activity [GO:0016787]	3	0	23.399	22	6	0	6	6	A0A1P8B5J8	A0A1P8B5J8	231	At4g03610	Metallo-hydrolase/oxidoreductase superfamily protein
262607460021973	28453483581543	264039096832275	285953750610352				7	0	32.23	14	10.4	5.2	10.4	5.2	A0A1P8B5Y3	A0A1P8B5Y3	233	SEN1	Rhodanese/Cell cycle control phosphatase superfamily protein
269686222076416	249412746429443	249938621520996	250757789611816			peptidyl-prolyl cis-trans isomerase activity [GO:0003755]	2	0.00057252	2.7189	10	6.2	14.3	14.3	6.2	A0A1P8B637	A0A1P8B637	234	At4g26555	Peptidylprolyl isomerase
270019588470459	268900623321533	268909912109375	270260162353516	cell wall organization [GO:0071555]	cell wall [GO:0005618];extracellular region [GO:0005576];integral component of membrane [GO:0016021]	hydrolase activity [GO:0016787]	6	0	22.917	60	20.4	8.6	20.4	17.1	A0A1P8B651	A0A1P8B651	235	PAE8	Pectin acetylesterase
317747821807861	31759744644165	317482719421387	319489345550537		cytoplasm [GO:0005737]	metal ion binding [GO:0046872];metalloaminopeptidase activity [GO:0070006]	49	0	323.31	746	67.6	64.6	62.3	65.8	A0A1P8B667	A0A1P8B667	236	APP1	Aminopeptidase P1
252797660827637	252314720153809	255635757446289	NaN	dTMP biosynthetic process [GO:0006231];methylation [GO:0032259];one-carbon metabolic process [GO:0006730];tetrahydrofolate biosynthetic process [GO:0046654]		dihydrofolate reductase activity [GO:0004146];thymidylate synthase activity [GO:0004799]	11	0	24.872	25	5.6	5.6	5.2	4.2	A0A1P8B676	A0A1P8B676	237	THY-2	Bifunctional dihydrofolate reductase-thymidylate synthase
NaN	NaN	24373119354248	24528980255127	deoxyribonucleoside triphosphate catabolic process [GO:0009204];nucleotide metabolic process [GO:0009117]	cytoplasm [GO:0005737]	dTTP diphosphatase activity [GO:0036218];metal ion binding [GO:0046872];NADH pyrophosphatase activity [GO:0035529];nucleotide binding [GO:0000166]	2	0.00094447	2.5479	13	5.5	5.5	5.5	5.5	A0A1P8B687	A0A1P8B687	238	At4g13720	Inosine triphosphate pyrophosphatase
24913330078125	247078304290771	24913330078125	232085418701172	CTP biosynthetic process [GO:0006241];'de novo' CTP biosynthetic process [GO:0044210];glutamine metabolic process [GO:0006541];pyrimidine nucleobase biosynthetic process [GO:0019856]		ATP binding [GO:0005524];CTP synthase activity [GO:0003883];identical protein binding [GO:0042802]	15	0	29.353	68	10.6	6.2	11.9	8.1	A0A1P8B6F9	A0A1P8B6F9	240	At4g02120	CTP synthase
275069561004639	270813159942627	273320217132568	27072244644165	defense response [GO:0006952]	extracellular region [GO:0005576]	kinase activity [GO:0016301]	7	0	17.229	24	22.2	18.9	19.3	14.8	A0A1P8B6P8	A0A1P8B6P8	243	At4g18253	Receptor Serine/Threonine kinase-like protein
255987224578857	259601593017578	253906726837158	253086929321289				12	0	24.613	48	2.2	2.9	2.5	1.1	A0A1P8B770	A0A1P8B770	246	G2484-1	G2484-1 protein
232847499847412	231577072143555	233363361358643	236358871459961			oxidoreductase activity [GO:0016491]	2	0.00019283	2.9064	11	6.2	6.2	6.2	6.2	A0A1P8B7E6	A0A1P8B7E6	248	At4g32360	Pyridine nucleotide-disulfide oxidoreductase family protein
247258796691895	NaN	226373691558838	252717399597168	ER-associated misfolded protein catabolic process [GO:0071712];ubiquitin-dependent ERAD pathway [GO:0030433]	VCP-NPL4-UFD1 AAA ATPase complex [GO:0034098]	polyubiquitin modification-dependent protein binding [GO:0031593]	11	0	51.34	35	1.3	0	1.2	1.3	A0A1P8B7F5	A0A1P8B7F5	249	At4g15420	Ubiquitin fusion degradation UFD1 family protein
247422180175781	238149948120117	242167491912842	246294536590576	polysaccharide catabolic process [GO:0000272]		amylopectin maltohydrolase activity [GO:0102229];beta-amylase activity [GO:0016161]	8	0	12.938	24	11.2	1.8	6.7	4.9	A0A1P8B7H0	A0A1P8B7H0	251	BAM5	Beta-amylase
289369411468506	289643859863281	282564697265625	290488739013672				15	0	59.973	111	27.7	28.3	28.3	24.2	A0A1P8B7H4	A0A1P8B7H4	252	At4g20750	NAD(P)-binding Rossmann-fold superfamily protein
27341552734375	271344757080078	267458629608154	263666973114014			RNA binding [GO:0003723]	1	0.0095137	1.4976	40	1.2	1.2	1.2	1.2	A0A1P8B7L2	A0A1P8B7L2	253	At4g29750	CRS1 / YhbY (CRM) domain-containing protein
260626850128174	263940944671631	25910083770752	263172416687012			metal ion binding [GO:0046872];oxidoreductase activity [GO:0016491]	3	0	3.8097	27	8.1	8.1	13.6	8.1	A0A1P8B7P9	A0A1P8B7P9	256	At4g16765	2-oxoglutarate (2OG) and Fe(II)-dependent oxygenase superfamily protein
279754161834717	281819152832031	280114803314209	280550689697266	RNA processing [GO:0006396]		RNA binding [GO:0003723];RNA methyltransferase activity [GO:0008173]	12	0	8.1502	39	1.1	1.6	1.1	1.1	A0A1P8B7Z4	A0A1P8B7Z4	259	At4g17610	tRNA/rRNA methyltransferase (SpoU) family protein
273269748687744	274783096313477	275098285675049	268096809387207	xylan catabolic process [GO:0045493]	cell wall [GO:0005618]	endo-1,4-beta-xylanase activity [GO:0031176]	8	0	12.76	30	13.2	16.3	17.4	11.1	A0A1P8B8F8	A0A1P8B8F8	261	XYN5	Endo-1,4-beta-xylanase 5
232155933380127	233542060852051	NaN	231570129394531		integral component of membrane [GO:0016021]	ATP binding [GO:0005524];protein kinase activity [GO:0004672]	3	0.0014859	2.2704	6	2.8	1.7	0	1.1	A0A1P8B8L9	A0A1P8B8L9	263	EMB1290	Cysteine-rich receptor-like protein kinase 17
313744087219238	313779792785645	31364631652832	313998355865479				82	0	323.31	798	45.3	45	45.6	45.6	A0A1P8B8R9	A0A1P8B8R9	265	At4g16660	Heat shock protein 70 (Hsp 70) family protein
288023948669434	287028923034668	28902250289917	288503131866455				11	0	66.625	104	19.5	18.2	18.2	16.9	A0A1P8B9A7	A0A1P8B9A7	267	CYL1	Alpha-N-acetylglucosaminidase family / NAGLU family
25580867767334	258707942962646	258021068572998	255762329101563				12	0	3.8657	26	4.4	2.5	4.1	7.2	A0A1P8B9J5	A0A1P8B9J5	270	MFC19.17	RNI-like superfamily protein
314792346954346	314134178161621	314683494567871	314800052642822	carboxylic acid metabolic process [GO:0019752]		transferase activity, transferring acyl groups, acyl groups converted into alkyl on transfer [GO:0046912]	49	0	323.31	374	64.8	69.5	60.1	60.5	A0A1P8B9L6	A0A1P8B9L6	271	MAM1	Methylthioalkylmalate synthase 1
308350734710693	307710876464844	307186546325684	303397922515869			peptidyl-prolyl cis-trans isomerase activity [GO:0003755]	16	0	253.23	152	55.2	47.9	53.1	43.4	A0A1P8B9P2	A0A1P8B9P2	272	At5g35100	Cyclophilin-like peptidyl-prolyl cis-trans isomerase family protein
305932579040527	304865417480469	306289710998535	304857730865479	glucan catabolic process [GO:0009251]		beta-glucosidase activity [GO:0008422]	27	0	240.32	273	34.9	32.7	37.2	37.5	A0A1P8B9U3	A0A1P8B9U3	274	At5g04885	Glycosyl hydrolase family protein
241015739440918	242635612487793	240014419555664	NaN	COPII vesicle coating [GO:0048208];protein transport [GO:0015031]	endoplasmic reticulum [GO:0005783];Golgi membrane [GO:0000139]		9	0.00075988	2.6255	14	1.2	1.2	2.2	0.9	A0A1P8B9X0	A0A1P8B9X0	275	MNJ7.8	Protein transport protein sec16
235033664703369	NaN	236562194824219	239075660705566				3	0.00057307	2.74	8	1.7	0	1.7	1.7	A0A1P8BA79	A0A1P8BA79	276	TAF5	TBP-associated factor 5
253736820220947	251519374847412	252524871826172	256130180358887	proteasome regulatory particle assembly [GO:0070682]	cytoplasm [GO:0005737];nucleus [GO:0005634];proteasome complex [GO:0000502]		7	0	70.19	37	15.6	7.4	15.6	7.4	A0A1P8BA81	A0A1P8BA81	277	MTI20.21	26S proteasome regulatory subunit
293404293060303	303521595001221	294826221466064	304597301483154				17	0	176	142	45.2	40.5	43.2	40.5	A0A1P8BAQ0	A0A1P8BAQ0	279	MNC6.3	Tetratricopeptide repeat (TPR)-like superfamily protein
269479312896729	270914402008057	267323398590088	264301872253418			heme binding [GO:0020037];metal ion binding [GO:0046872]	8	0	8.2796	39	22.6	18.7	23	17.5	A0A1P8BAR6	A0A1P8BAR6	280	RLF	Reduced lateral root formation
310553665161133	310674057006836	310956592559814	311672840118408	carbohydrate metabolic process [GO:0005975]		carbohydrate binding [GO:0030246];hydrolase activity, hydrolyzing O-glycosyl compounds [GO:0004553]	61	0	301.97	588	30.9	32	31.4	32.9	A0A1P8BAU5	A0A1P8BAU5	282	RSW3	Glycosyl hydrolases family 31 protein
240423488616943	NaN	241547584533691	236383209228516				1	0	3.9268	12	3.6	0	3.6	3.6	A0A1P8BAY4	A0A1P8BAY4	283	RUG3	Regulator of chromosome condensation (RCC1) family protein
308394355773926	308884525299072	309397163391113	309596118927002	L-methionine salvage from methylthioadenosine [GO:0019509];L-methionine salvage from S-adenosylmethionine [GO:0019284]	cytoplasm [GO:0005737]	2,3-diketo-5-methylthiopentyl-1-phosphate enolase activity [GO:0043715];2-hydroxy-3-keto-5-methylthiopentenyl-1-phosphate phosphatase activity [GO:0043716];acireductone synthase activity [GO:0043874];magnesium ion binding [GO:0000287];methylthioribulose 1-phosphate dehydratase activity [GO:0046570];zinc ion binding [GO:0008270]	39	0	323.31	552	55.3	56.2	42.8	59.8	A0A1P8BAY5	A0A1P8BAY5	284	DEP1	Probable bifunctional methylthioribulose-1-phosphate dehydratase/enolase-phosphatase E1
308678379058838	307313365936279	307050380706787	307956771850586			catalytic activity [GO:0003824]	28	0	296.3	293	53.7	47.8	51.2	56.7	A0A1P8BB43	A0A1P8BB43	285	MDJ22.4	Phosphoglycerate/bisphosphoglycerate mutase family protein
254740123748779	242264823913574	255782775878906	273379020690918			RNA binding [GO:0003723]	13	0	26.302	53	6.6	2.6	9.8	6.6	A0A1P8BBW1	A0A1P8BBW1	292	At5g15270	RNA-binding KH domain-containing protein
272093677520752	NaN	273401947021484	249011325836182	intracellular protein transport [GO:0006886]	nucleus [GO:0005634]	Ran GTPase binding [GO:0008536]	21	0	49.863	89	1	0	1	2.8	A0A1P8BC62	A0A1P8BC62	294	At5g06120	ARM repeat superfamily protein
257564888000488	258209438323975	258227939605713	256785526275635	pentose-phosphate shunt, non-oxidative branch [GO:0009052]		ribose-5-phosphate isomerase activity [GO:0004751];transferase activity [GO:0016740]	4	0	25.575	26	11.3	8	16.9	11.3	A0A1P8BDP5	A0A1P8BDP5	299	MFC16.20	NagB/RpiA/CoA transferase-like superfamily protein
275402297973633	275751361846924	273307399749756	272756862640381	chloroplast accumulation movement [GO:0009904];microtubule-based movement [GO:0007018]		ATP binding [GO:0005524];microtubule binding [GO:0008017];microtubule motor activity [GO:0003777]	35	0	42.543	87	16.7	17.6	17	13.4	A0A1P8BDP7	A0A1P8BDP7	300	KAC2	Kinesin like protein for actin based chloroplast movement 2
262190780639648	NaN	264449653625488	262267227172852	galactose metabolic process [GO:0006012]	integral component of membrane [GO:0016021]	UDP-glucose 4-epimerase activity [GO:0003978]	5	0.00075945	2.6097	8	2.4	0	2.4	2.4	A0A1P8BDS3	A0A1P8BDS3	301	DUR	NAD(P)-binding Rossmann-fold superfamily protein
279824504852295	283118133544922	282138233184814	28345027923584		anaphase-promoting complex [GO:0005680];integral component of membrane [GO:0016021]	ligase activity [GO:0016874]	8	0	5.7995	33	1.1	1.5	1.5	1.9	A0A1P8BDT7	A0A1P8BDT7	303	EMB2771	E3 ubiquitin ligase
26848762512207	264092788696289	268041515350342	265143795013428				23	0	34.147	69	4.9	4.5	5.5	4.4	A0A1P8BDV1	A0A1P8BDV1	304	MQJ2.5	Tetratricopeptide repeat (TPR)-like superfamily protein
NaN	NaN	226297874450684	229482078552246	protein targeting to peroxisome [GO:0006625]	peroxisomal membrane [GO:0005778]	ATP binding [GO:0005524];ATPase activity [GO:0016887]	5	0	3.5945	19	0.8	0.8	0.8	0.8	A0A1P8BDY2	A0A1P8BDY2	305	PEX1	Peroxisome 1
284014549255371	259207077026367	267450923919678	304472675323486		integral component of membrane [GO:0016021]		12	0	20.156	39	1	1.5	4	2.5	A0A1P8BE11	A0A1P8BE11	306	At5g52580	RabGAP/TBC domain-containing protein
250472259521484	249805030822754	249254245758057	249088020324707			nucleic acid binding [GO:0003676]	4	0	4.3746	5	1.2	1.2	1.2	1.2	A0A1P8BE91	A0A1P8BE91	307	SDN3	Small RNA degrading nuclease 3
269784736633301	26984245300293	271622142791748	274025115966797				12	0	29.729	73	17.2	14.5	17.2	15.6	A0A1P8BEF2	A0A1P8BEF2	308	At5g67385	Phototropic-responsive NPH3 family protein
NaN	263286018371582	256041927337646	NaN	ribosome-associated ubiquitin-dependent protein catabolic process [GO:1990116]	RQC complex [GO:1990112]	ubiquitin protein ligase activity [GO:0061630];zinc ion binding [GO:0008270]	32	0	178.77	103	0	0.6	1.5	0	A0A1P8BEG9	A0A1P8BEG9	309	MCK7.28	HEAT/U-box domain-containing protein
258605308532715	264760684967041	260207271575928	271470527648926			transferase activity [GO:0016740]	9	0	7.5419	13	2.7	1.1	2.7	2.7	A0A1P8BER5	A0A1P8BER5	311	MKP11.12	Protein prenylyltransferase superfamily protein
284195690155029	287457656860352	285268630981445	284367847442627		chloroplast [GO:0009507]	isomerase activity [GO:0016853]	13	0	23.986	82	27.2	27.2	30.5	28.7	A0A1P8BEU1	A0A1P8BEU1	313	At5g27390	Tagatose-6-phosphate ketose/aldose isomerase, putative (Mog1/PsbP/DUF1795-like photosystem II reaction center PsbP family protein)
257204895019531	255356998443604	26265869140625	265679759979248			peptide-methionine (S)-S-oxide reductase activity [GO:0008113]	8	0	45.428	21	30.6	30.6	20.1	30.6	A0A1P8BF28	A0A1P8BF28	314	PMSR1	Peptidemethionine sulfoxide reductase 1
296736583709717	295325965881348	295572414398193	294713668823242			ATP binding [GO:0005524]	102	0	323.31	289	74.6	74.7	69.8	71.5	A0A1P8BF32	A0A1P8BF32	315	BIP2	Heat shock protein 70 (Hsp 70) family protein
264545822143555	265927772521973	259893436431885	256078357696533				15	0	26.442	50	4.8	2	2.9	2.9	A0A1P8BF80	A0A1P8BF80	316	MPO12.6	Tudor/PWWP/MBT superfamily protein
295441417694092	294084568023682	29700662612915	297431030273438			GTP binding [GO:0005525];GTPase activity [GO:0003924];metal ion binding [GO:0046872];translation elongation factor activity [GO:0003746];translation initiation factor activity [GO:0003743]	5	0	5.2597	15	5.6	2.8	2.8	2.8	A0A1P8BFE6	A0A1P8BFE6	318	At5g10630	Translation elongation factor EF1A/initiation factor IF2gamma family protein
261153526306152	270691738128662	262976112365723	280233745574951	mannose metabolic process [GO:0006013]		alpha-mannosidase activity [GO:0004559];carbohydrate binding [GO:0030246];metal ion binding [GO:0046872]	2	0	7.6747	42	2.5	1.6	1.6	2.5	A0A1P8BFL6	A0A1P8BFL6	320	At5g66150	Alpha-mannosidase
342882270812988	34235279083252	343003463745117	342610130310059				42	0	323.31	765	70.4	70.4	69.2	69.2	A0A1P8BG37	A0A1P8BG37	324	HCF136	Photosystem II stability/assembly factor, chloroplast (HCF136)
317777252197266	317188587188721	318032035827637	318607521057129	carbohydrate metabolic process [GO:0005975]		intramolecular transferase activity, phosphotransferases [GO:0016868]	44	0	323.31	605	72.9	69.9	72.9	68.8	A0A1P8BGJ0	A0A1P8BGJ0	327	At5g17530	Phosphoglucosamine mutase family protein
262323875427246	25761697769165	259303741455078	259343166351318	signal transduction [GO:0007165]		ADP binding [GO:0043531]	12	0	10.69	32	2.2	1.1	2.2	1.1	A0A1P8BGN6	A0A1P8BGN6	328	At5g45210	Disease resistance protein (TIR-NBS-LRR class) family
265317783355713	263728523254395	261223411560059	269217300415039				3	0	3.2153	8	9.1	9.1	9.1	9.1	A0A1P8BGX1	A0A1P8BGX1	330	At5g27710	T-box protein
NaN	245000267028809	244136428833008	NaN		nuclear pore [GO:0005643]		20	0	36.305	67	0	1.1	1.1	0	A0A1P8BGZ1	A0A1P8BGZ1	331	EMB3142	Nuclear pore complex protein (DUF3414)
245011196136475	250647621154785	249555339813232	25179723739624			electron transfer activity [GO:0009055]	4	0	3.5323	11	8	9.4	6.9	10.5	A0A1P8BGZ7	A0A1P8BGZ7	332	ENODL1	Early nodulin-like protein 1
2435622215271	242082138061523	240280838012695	247559795379639			serine-type endopeptidase activity [GO:0004252]	3	0	5.9862	12	2.3	1	3.4	5.3	A0A1P8BHH8	A0A1P8BHH8	336	MFC16.21	Subtilase family protein
270397796630859	265200424194336	265157794952393	263117961883545				2	0	5.5088	5	8	3.2	3.2	8	A0A1R7T377	A0A1R7T377	337	At5g27560	DUF1995 domain protein, putative (DUF1995)
278773632049561	277885551452637	276625480651855	27829475402832		mitochondrial matrix [GO:0005759]	electron transfer activity [GO:0009055]	13	0	88.754	112	34.4	42.9	41.5	36.9	A0A1R7T3K7	A0A1R7T3K7	339	ETFBETA	Electron transfer flavoprotein subunit beta
NaN	NaN	241170387268066	248105888366699		apoplast [GO:0048046]		2	0	6.5675	14	0	0	4.4	4.4	A0A2H1ZE31	A0A2H1ZE31	340	ESB1	Dirigent protein
368862648010254	368085632324219	36844783782959	366992874145508	glycine catabolic process [GO:0006546]	mitochondrion [GO:0005739]	aminomethyltransferase activity [GO:0004047];transaminase activity [GO:0008483]	70	0	323.31	2772	83	87.7	83	83	A0A2H1ZEA9	A0A2H1ZEA9	341	At1g11860	Aminomethyltransferase
233802051544189	229294033050537	227406940460205	226155128479004	microtubule-based movement [GO:0007018]		ATP binding [GO:0005524];microtubule binding [GO:0008017];microtubule motor activity [GO:0003777]	4	0.00019146	2.7866	7	2	2	1.3	2	A0A2H1ZEJ0	A0A2H1ZEJ0	345	At3g45850	P-loop containing nucleoside triphosphate hydrolases superfamily protein
26311466217041	254249267578125	265469398498535	268486423492432	translation [GO:0006412]	mitochondrion [GO:0005739];ribosome [GO:0005840]	RNA binding [GO:0003723];structural constituent of ribosome [GO:0003735]	16	0	92.14	66	1.3	5.4	1.3	1.3	A0A2P2CLF3	A0A2P2CLF3	347	rps3	Ribosomal protein S3
315272922515869	314962425231934	315715866088867	31714771270752	ATP synthesis coupled proton transport [GO:0015986]	mitochondrion [GO:0005739];proton-transporting ATP synthase complex, catalytic core F(1) [GO:0045261]	ATP binding [GO:0005524];proton-transporting ATP synthase activity, rotational mechanism [GO:0046933]	45	0	323.31	790	48.1	50.1	46.5	41.8	A0A2P2CLF9	A0A2P2CLF9	350	atp1	ATP synthase subunit alpha
251971187591553	252026214599609	NaN	NaN	regulation of RNA splicing [GO:0043484]	nucleoplasm [GO:0005654];ribonucleoprotein complex [GO:1990904];ribosome [GO:0005840]	RNA binding [GO:0003723]	5	0	11.084	17	6.1	17.1	0	7.9	A0JQ00	A0JQ00	353	At5g02740	At5g02740
295312767028809	294442310333252	295762729644775	294475040435791		cell wall [GO:0005618];vacuole [GO:0005773]		6	0	276.22	135	44	44	44	40	A0JQ12	A0JQ12	354	At1g76020	At1g76020
309143486022949	309364204406738	309674682617188	309747333526611	D-ribose catabolic process [GO:0019303];nucleoside metabolic process [GO:0009116]	chloroplast [GO:0009507];chloroplast nucleoid [GO:0042644];chloroplast stroma [GO:0009570];nucleus [GO:0005634];plastid nucleoid [GO:0042646]	ATP binding [GO:0005524];metal ion binding [GO:0046872];ribokinase activity [GO:0004747]	23	0	308	304	55.4	55.4	54.6	50.9	A1A6H3	A1A6H3	355	RBSK	Ribokinase
239080238342285	240012702941895	242150459289551	243424530029297		nucleus [GO:0005634]	AT DNA binding [GO:0003680]	3	0	13.122	6	6.6	4.4	4.4	4.4	A1L4X7	A1L4X7	356	AHL14	AT-hook motif nuclear-localized protein 14
24448844909668	245963935852051	246141414642334	247019214630127		chloroplast stroma [GO:0009570]	ATP binding [GO:0005524];ATPase activity [GO:0016887]	5	0	5.257	19	4.9	8.5	4.9	4.9	A1L4Y1	A1L4Y1	357	GET3B	ATPase GET3B
315917873382568	315849952697754	315829334259033	315223903656006	cellular response to oxidative stress [GO:0034599];response to high light intensity [GO:0009644]	cytoplasm [GO:0005737];cytosol [GO:0005829];plastid [GO:0009536]	AU-rich element binding [GO:0017091];NADPH:quinone reductase activity [GO:0003960]	32	0	318.16	453	58.6	59.1	60.8	56.4	A1L4Y4	A1L4Y4	358	At5g61510	At5g61510
282534523010254	283388366699219	283206195831299	285702209472656	heat acclimation [GO:0010286];negative regulation of gene silencing [GO:0060969];regulation of cellular response to heat [GO:1900034];regulation of mitotic chromosome decondensation [GO:1901651];response to heat [GO:0009408]	chromocenter [GO:0010369];nucleolus [GO:0005730]		22	0	96.737	151	26.5	28.8	27.4	27.9	A2RVJ8	A2RVJ8	359	HIT4	Protein HEAT INTOLERANT 4
249207077026367	251691703796387	249976577758789	247950611114502	RNA processing [GO:0006396]	cytoplasm [GO:0005737];nuclear exosome (RNase complex) [GO:0000176];plastid [GO:0009536]	RNA binding [GO:0003723]	6	0	7.9096	22	5.2	5.2	5.2	5.2	A2RVT9	A2RVT9	362	At5g38890	AT5G38890 protein
289764537811279	292002983093262	289331455230713	287812557220459				16	0	102.01	191	37.8	38.3	41.8	43.8	A2RVV4	A2RVV4	363	MRI1.6	At5g57700
268715000152588	270680465698242	268725566864014	268624248504639	one-carbon metabolic process [GO:0006730];photorespiration [GO:0009853];tetrahydrofolate interconversion [GO:0035999]	cytosol [GO:0005829];mitochondrion [GO:0005739]	methenyltetrahydrofolate cyclohydrolase activity [GO:0004477];methylenetetrahydrofolate dehydrogenase (NADP+) activity [GO:0004488]	9	0	11.112	58	24.1	24.1	24.1	21.9	A2RVV7	A2RVV7	364	FOLD1	Bifunctional protein FolD 1, mitochondrial
245025787353516	251470146179199	252415809631348	247782115936279				4	0	33.963	10	9.5	4.2	4.2	9.5	A2RVW1	A2RVW1	365	At4g33480	At4g33480
279116516113281	28130407333374	279464817047119	278624839782715	histone H3-R17 methylation [GO:0034971];histone H3-R2 methylation [GO:0034970];histone H3-R26 methylation [GO:0034972];peptidyl-arginine methylation, to asymmetrical-dimethyl arginine [GO:0019919];regulation of flower development [GO:0009909];vegetative to reproductive phase transition of meristem [GO:0010228]	chloroplast [GO:0009507];cytoplasm [GO:0005737];nucleus [GO:0005634]	[myelin basic protein]-arginine N-methyltransferase activity [GO:0016277];histone-arginine N-methyltransferase activity [GO:0008469];protein heterodimerization activity [GO:0046982];protein homodimerization activity [GO:0042803];protein-arginine omega-N asymmetric methyltransferase activity [GO:0035242];protein-arginine omega-N monomethyltransferase activity [GO:0035241]	25	0	65.746	153	22.5	25.6	25	29.9	A3KPF2	A3KPF2	366	PRMT14	Probable histone-arginine methyltransferase 1.4
242624855041504	248375930786133	253090400695801	230671043395996		spliceosomal complex [GO:0005681]		11	0	24.361	21	4.2	2.6	2.6	4	A3KPF3	A3KPF3	367	At3g02710	ARM repeat superfamily protein
264646339416504	26810417175293	NaN	258954811096191		chloroplast [GO:0009507]		1	0.010011	1.4614	20	1.4	1.4	0	1.4	A3KPF8	A3KPF8	368	At1g79080	Pentatricopeptide repeat-containing protein At1g79080, chloroplastic
240520858764648	251310844421387	245227699279785	245710906982422	mRNA splicing, via spliceosome [GO:0000398]	catalytic step 2 spliceosome [GO:0071013];extracellular region [GO:0005576]		9	0	13.471	49	4	2.1	4	4	A4FVN8	A4FVN8	369	At1g10580	At1g10580
245268936157227	245066394805908	NaN	236001415252686	phosphatidylethanolamine biosynthetic process [GO:0006646];protein autoprocessing [GO:0016540]	cytosol [GO:0005829];endoplasmic reticulum [GO:0005783];endoplasmic reticulum membrane [GO:0005789]	calcium ion binding [GO:0005509];phosphatidylserine decarboxylase activity [GO:0004609]	9	0	4.3225	21	6.8	6.8	0	6.8	A4GNA8	A4GNA8	370	PSD3	Phosphatidylserine decarboxylase proenzyme 3
254633560180664	NaN	NaN	266293697357178	mRNA export from nucleus [GO:0006406];negative regulation of flower development [GO:0009910];negative regulation of protein sumoylation [GO:0033234];poly(A)+ mRNA export from nucleus [GO:0016973];protein import into nucleus [GO:0006606];regulation of gene silencing [GO:0060968];stamen development [GO:0048443]	cytosol [GO:0005829];mitochondrion [GO:0005739];nuclear envelope [GO:0005635];nuclear membrane [GO:0031965];nuclear pore [GO:0005643];nucleolus [GO:0005730];plasmodesma [GO:0009506]	structural constituent of nuclear pore [GO:0017056]	44	0	108.09	100	1.3	0.3	0	0.8	A4GSN8	A4GSN8	371	NUA	Nuclear-pore anchor
283285579681396	282404537200928	297171516418457	309522705078125	proteolysis [GO:0006508]	vacuole [GO:0005773]	carboxypeptidase activity [GO:0004180];dipeptidyl-peptidase activity [GO:0008239];serine-type peptidase activity [GO:0008236]	21	0	22.423	14	31.3	24.3	30.3	28.2	A4VCL8	A4VCL8	372	At4g36190	At4g36190
317483921051025	31783863067627	31806510925293	317978420257568	carbohydrate metabolic process [GO:0005975]	cytosol [GO:0005829];secretory vesicle [GO:0099503];vacuole [GO:0005773]	beta-N-acetylhexosaminidase activity [GO:0004563];hexosaminidase activity [GO:0015929];N-acetyl-beta-D-galactosaminidase activity [GO:0102148]	31	0	292.57	386	39	43.3	38.1	45.5	A7WM73	A7WM73	373	HEXO1	Beta-hexosaminidase 1
234933834075928	250055599212646	238554782867432	245961074829102			RNA binding [GO:0003723]	9	0	119.07	41	5.7	20.7	5.7	9.6	A8MQ78	A8MQ78	375	ALY4	ALWAYS EARLY 4
26481315612793	269105644226074	26250789642334	260945644378662		integral component of membrane [GO:0016021];nucleus [GO:0005634];plasma membrane [GO:0005886]	ATP binding [GO:0005524];protein kinase activity [GO:0004672]	8	0	8.4883	39	6.4	4.7	7.1	4	A8MQH3	A8MQH3	378	SRF6	STRUBBELIG-receptor family 6
254161891937256	250537433624268	255350761413574	253901481628418				3	0	72.752	37	20.9	20.9	13	13	A8MQJ8	A8MQJ8	380	At2g37680	Glucose-induced degradation-like protein
267633190155029	271161460876465	269732284545898	268895988464355		nascent polypeptide-associated complex [GO:0005854]		11	0	139.01	81	30.3	30.3	36.5	23.2	A8MQP6	A8MQP6	381	At4g10480	Nascent polypeptide-associated complex (NAC), alpha subunit family protein
313834495544434	313831920623779	313526859283447	314364376068115			methylmalonate-semialdehyde dehydrogenase (acylating) activity [GO:0004491]	39	0	323.31	602	45.8	46.6	49.4	48.6	A8MQR6	A8MQR6	382	ALDH6B2	Aldehyde dehydrogenase 6B2
273104267120361	269817428588867	273940296173096	273675308227539			RNA binding [GO:0003723]	15	0	113.17	80	9.1	7.7	19.5	14.2	A8MR27	A8MR27	385	PTB3	Polypyrimidine tract-binding protein 3
262323703765869	267662296295166	265852012634277	267518749237061				6	0	48.615	42	19.8	13.8	19.8	19.8	A8MR72	A8MR72	386	At2g26210	Ankyrin repeat family protein
275075607299805	275890655517578	275447311401367	275599784851074			translation initiation factor activity [GO:0003743]	39	0	244.99	203	7.3	8.3	9.5	10.7	A8MR97	A8MR97	387	EIF4G	Eukaryotic translation initiation factor 4G
273159637451172	271889572143555	272443599700928	27761100769043	nucleosome assembly [GO:0006334]	nucleus [GO:0005634]		37	0	323.31	236	32.2	28.4	35.1	31.4	A8MRK6	A8MRK6	389	NAP1:2	Nucleosome assembly protein 12
24131477355957	244969215393066	242262630462646	237374801635742	carbon dioxide transport [GO:0015670];response to salt stress [GO:0009651];response to water deprivation [GO:0009414];water transport [GO:0006833]	anchored component of plasma membrane [GO:0046658];cytosol [GO:0005829];integral component of membrane [GO:0016021];plasma membrane [GO:0005886];vacuole [GO:0005773]	water channel activity [GO:0015250]	6	0	49.27	36	3.3	3.3	3.3	3.3	A8MRW1	A8MRW1	390	PIP1B	Plasma membrane intrinsic protein 1B
239052715301514	234459438323975	239998092651367	245446872711182	cellular glucose homeostasis [GO:0001678];glycolytic process [GO:0006096]		ATP binding [GO:0005524];glucose binding [GO:0005536];hexokinase activity [GO:0004396]	6	0	4.0839	21	13.5	9.9	7.1	10.7	A8MRW9	A8MRW9	391	HXK2	Phosphotransferase
275122413635254	277274780273438	278147010803223	273860740661621	glucosinolate biosynthetic process [GO:0019761]		8-methylthiopropyl glucosinolate S-oxygenase activity [GO:0080107];flavin adenine dinucleotide binding [GO:0050660];N,N-dimethylaniline monooxygenase activity [GO:0004499];NADP binding [GO:0050661]	32	0	159.83	223	20.9	17.9	26.6	12.2	A8MRX0	A8MRX0	392	FMOGS-OX5	Flavin-containing monooxygenase FMO GS-OX5
236041069030762	242852439880371	NaN	239070148468018				2	0.0013052	2.3186	9	3.8	3.8	0	3.8	A8MS42	A8MS42	395	At4g38670	Pathogenesis-related thaumatin superfamily protein
28147102355957	281579322814941	280675849914551	279222393035889	acetyl-CoA biosynthetic process from pyruvate [GO:0006086];cell redox homeostasis [GO:0045454];oxidation-reduction process [GO:0055114];response to arsenic-containing substance [GO:0046685]	chloroplast envelope [GO:0009941];chloroplast stroma [GO:0009570];cytosol [GO:0005829];nucleolus [GO:0005730]	dihydrolipoyl dehydrogenase activity [GO:0004148];flavin adenine dinucleotide binding [GO:0050660]	44	0	323.31	272	50.2	41.9	41.1	40.6	A8MS68	A8MS68	396	LPD1	Dihydrolipoyl dehydrogenase 1, chloroplastic
215261173248291	185396957397461	222836208343506	217882747650146	chromatin maintenance [GO:0070827];embryo development ending in seed dormancy [GO:0009793];mRNA transcription by RNA polymerase II [GO:0042789];nucleosome organization [GO:0034728];positive regulation of transcription elongation from RNA polymerase II promoter [GO:0032968];regulation of mRNA processing [GO:0050684];transcription elongation from RNA polymerase II promoter [GO:0006368]	cytosol [GO:0005829];plasmodesma [GO:0009506];transcription elongation factor complex [GO:0008023];transcriptionally active chromatin [GO:0035327]	histone binding [GO:0042393];nucleosome binding [GO:0031491];translation elongation factor activity [GO:0003746]	42	0	189.62	199	1.9	1.3	3	2.4	A8MS85	A8MS85	397	SPT6	Transcription elongation factor SPT6 homolog
274790802001953	NaN	273318500518799	272056446075439		mitochondrial matrix [GO:0005759]		6	0	5.2785	31	15.5	6.3	9.7	22.2	A8MSD8	A8MSD8	399	At2g41600	Mitochondrial glycoprotein family protein
25730655670166	259165229797363	255108394622803	256731700897217	cell surface pattern recognition receptor signaling pathway [GO:0002752];cellular response to chitin [GO:0071323];cellular response to molecule of bacterial origin [GO:0071219];defense response to bacterium [GO:0042742];defense response to fungus, incompatible interaction [GO:0009817];detection of molecule of fungal origin [GO:0032491];detection of peptidoglycan [GO:0032499];innate immune respons…	integral component of membrane [GO:0016021];plasma membrane [GO:0005886]	ATP binding [GO:0005524];chitin binding [GO:0008061];chitosan binding [GO:2001080];identical protein binding [GO:0042802];kinase activity [GO:0016301];protein homodimerization activity [GO:0042803];protein kinase activity [GO:0004672];protein self-association [GO:0043621];protein serine/threonine kinase activity [GO:0004674];transmembrane receptor protein kinase activity [GO:0019199]	1	0	3.5337	17	1.8	1.8	1.8	1.8	A8R7E6	A8R7E6	401	CERK1	Chitin elicitor receptor kinase 1
264977588653564	263523368835449	265986099243164	267462463378906	intracellular protein transport [GO:0006886];retrograde transport, endosome to Golgi [GO:0042147]	cytosol [GO:0005829];Golgi apparatus [GO:0005794];intracellular membrane-bounded organelle [GO:0043231];late endosome [GO:0005770];late endosome membrane [GO:0031902];membrane [GO:0016020];multivesicular body [GO:0005771];retromer complex [GO:0030904];retromer, cargo-selective complex [GO:0030906]		21	0	46.485	69	1	1	1	1	A8R7K9	A8R7K9	402	VPS35C	Vacuolar protein sorting-associated protein 35C
270988864898682	254301376342773	244974708557129	248379783630371	exonucleolytic trimming to generate mature 3'-end of 5.8S rRNA from tricistronic rRNA transcript (SSU-rRNA, 5.8S rRNA, LSU-rRNA) [GO:0000467];gene silencing by RNA-directed DNA methylation [GO:0080188];histone mRNA catabolic process [GO:0071044];nuclear polyadenylation-dependent antisense transcript catabolic process [GO:0071040];nuclear polyadenylation-dependent CUT catabolic process [GO:0071039…	cytoplasm [GO:0005737];cytosol [GO:0005829];nuclear exosome (RNase complex) [GO:0000176];nucleolus [GO:0005730];nucleus [GO:0005634]	3'-5'-exoribonuclease activity [GO:0000175];nucleotide binding [GO:0000166];single-stranded RNA binding [GO:0003727]	11	0	24.471	33	1.1	2.9	2.9	1.7	A9LLI7	A9LLI7	403	RRP6L2	Protein RRP6-like 2
264462280273438	263618698120117	268307437896729	260617160797119	endoplasmic reticulum to Golgi vesicle-mediated transport [GO:0006888];Golgi vesicle docking [GO:0048211];intracellular protein transport [GO:0006886];membrane fusion [GO:0061025];post-embryonic development [GO:0009791];protein exit from endoplasmic reticulum [GO:0032527];transcytosis [GO:0045056];vesicle fusion with Golgi apparatus [GO:0048280]	cytosol [GO:0005829];endoplasmic reticulum [GO:0005783];ER to Golgi transport vesicle membrane [GO:0012507];Golgi apparatus [GO:0005794];Golgi membrane [GO:0000139];Golgi stack [GO:0005795]		35	0	319.31	166	7.7	6.7	10.5	5.3	B0F9L4	B0F9L4	404	GC6	Golgin candidate 6
252388877868652	255608959197998	258975143432617	266093578338623	fumarate metabolic process [GO:0006106];tricarboxylic acid cycle [GO:0006099]	tricarboxylic acid cycle enzyme complex [GO:0045239]	fumarate hydratase activity [GO:0004333]	22	0.0029406	2.0677	10	67.2	66.9	62.5	59.6	B3H477	B3H477	405	FUM2	FUMARASE 2
296725120544434	296346244812012	297480239868164	298588733673096				12	0	131.46	136	39.3	47.2	57.5	49.5	B3H4M0	B3H4M0	408	PIFI	Post-illumination chlorophyll fluorescence increase
299703502655029	299345245361328	298601608276367	299537982940674			translation initiation factor activity [GO:0003743]	26	0	150.49	259	42.1	39.7	44.2	44.8	B3H5L3	B3H5L3	411	At1g73180	Eukaryotic translation initiation factor eIF2A family protein
NaN	254273910522461	NaN	251573066711426			lipid binding [GO:0008289]	8	0	7.9106	16	0	1.8	0	1.7	B3H5W6	B3H5W6	413	At5g35180	AT5G35180 protein
326330261230469	325480270385742	325004730224609	324901084899902	branched-chain amino acid biosynthetic process [GO:0009082]		L-isoleucine transaminase activity [GO:0052656];L-leucine transaminase activity [GO:0052654];L-valine transaminase activity [GO:0052655]	33	0	323.31	550	53.8	50.1	53.3	56.7	B3H658	B3H658	414	BCAT3	Branched-chain-amino-acid aminotransferase
264222354888916	265131607055664	267351837158203	265484409332275	nucleosome assembly [GO:0006334]	nucleus [GO:0005634]		31	0	303.56	176	17.3	25.3	28.1	23.4	B3H684	B3H684	415	NAP1:1	Nucleosome assembly protein11
239041690826416	240161437988281	238736133575439	255149078369141	methylation [GO:0032259]		methyltransferase activity [GO:0008168]	2	0.0098436	1.4725	2	5.1	5.1	5.1	5.1	B3H6G9	B3H6G9	416	At4g02405	S-adenosyl-L-methionine-dependent methyltransferases superfamily protein
NaN	240828590393066	NaN	249780597686768		cytosol [GO:0005829];plasmodesma [GO:0009506];plastid [GO:0009536]	acylglycerol lipase activity [GO:0047372]	5	0	11.948	12	0	3	0	3	B3H7N1	B3H7N1	423	At5g16120	Alpha/beta-Hydrolases superfamily protein
276348495483398	273469715118408	27636302947998	278505516052246	pectin catabolic process [GO:0045490]		metal ion binding [GO:0046872];pectate lyase activity [GO:0030570]	11	0	25.571	63	31.1	32.6	27.2	26	B3LF89	B3LF89	424	At3g55140	Pectate lyase
300006160736084	299786930084229	298627796173096	300574989318848	cysteinyl-tRNA aminoacylation [GO:0006423];response to cadmium ion [GO:0046686]	cytoplasm [GO:0005737];cytosol [GO:0005829]	ATP binding [GO:0005524];cysteine-tRNA ligase activity [GO:0004817];metal ion binding [GO:0046872]	39	0	310.29	407	39.9	44.2	32.7	38.7	B3LFA4	B3LFA4	425	At5g38830	Cysteine--tRNA ligase 2, cytoplasmic
245452175140381	251240386962891	NaN	NaN	positive regulation of shoot apical meristem development [GO:1902185]	nucleus [GO:0005634]	ATP binding [GO:0005524];DNA binding [GO:0003677];DNA-dependent ATPase activity [GO:0008094];helicase activity [GO:0004386]	4	0	6.5487	13	0.4	0.4	0	0	B5BT18	B5BT18	426	BTAF1	TATA-binding protein-associated factor BTAF1
279953956604004	280723991394043	280482234954834	2795432472229	embryo development ending in seed dormancy [GO:0009793];plastid transcription [GO:0042793]	chloroplast [GO:0009507];cytosol [GO:0005829]	GTP binding [GO:0005525]	17	0	32.714	102	13.9	11.2	12.5	12.7	B5X565	B5X565	430	emb2738	At3g12080
283590068817139	281737422943115	282983722686768	283854160308838				9	0	52.442	67	61.7	61.7	61.7	54.9	B6EUA5	B6EUA5	432	At1g12250	Pentapeptide repeat-containing protein
NaN	239731616973877	217716083526611	NaN	mRNA cis splicing, via spliceosome [GO:0045292];mRNA splicing, via spliceosome [GO:0000398]	cytosol [GO:0005829];mediator complex [GO:0016592];U1 snRNP [GO:0005685];U2-type prespliceosome [GO:0071004]	RNA binding [GO:0003723]	11	0	29.998	53	0	1.6	1.4	0	B6EUA9	B6EUA9	433	PRP40A	Pre-mRNA-processing protein 40A
3122705078125	312308902740479	31336763381958	313734226226807		cytosol [GO:0005829];plasma membrane [GO:0005886];vacuole [GO:0005773]	hydrolase activity, acting on carbon-nitrogen (but not peptide) bonds, in linear amides [GO:0016811]	31	0	323.31	405	63.9	60.2	61.1	61.3	B9DFI3	B9DFI3	435	At4g37550	AT4G37550 protein
227907238006592	244610137939453	228885726928711	22054573059082	ATP synthesis coupled electron transport [GO:0042773]	membrane [GO:0016020]	electron transfer activity [GO:0009055];iron-sulfur cluster binding [GO:0051536];NADH dehydrogenase (ubiquinone) activity [GO:0008137]	29	0	213.99	88	2.1	3	5.1	2.4	B9DFQ9	B9DFQ9	437	EMB1467	AT5G37510 protein
273779907226563	27571813583374	275970458984375	270959720611572	cell wall organization [GO:0071555]	extracellular region [GO:0005576];plant-type cell wall [GO:0009505]	carboxylic ester hydrolase activity [GO:0052689];pectin acetylesterase activity [GO:0052793]	7	0	54.698	36	18.8	12.2	20.2	29.3	B9DFR3	B9DFR3	438	PAE9	Pectin acetylesterase 9
307765884399414	306502723693848	307336807250977	306815223693848	cysteine biosynthetic process [GO:0019344];cysteine biosynthetic process from serine [GO:0006535];double fertilization forming a zygote and endosperm [GO:0009567];pollen tube development [GO:0048868];pollen tube growth [GO:0009860]	chloroplast [GO:0009507];chloroplast stroma [GO:0009570];cytosol [GO:0005829];mitochondrion [GO:0005739]	ATP binding [GO:0005524];cysteine synthase activity [GO:0004124];lyase activity [GO:0016829];zinc ion binding [GO:0008270]	41	0	323.31	496	63.7	66.3	62.1	63.5	B9DFR6	B9DFR6	439	OASC	Cysteine synthase
233492183685303	236980571746826	NaN	NaN	developmental process [GO:0032502];late endosome to vacuole transport [GO:0045324];protein maturation [GO:0051604];protein transport [GO:0015031];seedling development [GO:0090351];vesicle-mediated transport [GO:0016192]	cytosol [GO:0005829];Golgi apparatus [GO:0005794];membrane [GO:0016020];multivesicular body membrane [GO:0032585];retromer complex [GO:0030904]	phosphatidylinositol binding [GO:0035091];phospholipid binding [GO:0005543];protein heterodimerization activity [GO:0046982]	9	0	16.378	25	3	1.4	0	0	B9DFS6	B9DFS6	440	SNX2B	Sorting nexin 2B
263462619781494	264142074584961	269187755584717	268321933746338			GTP binding [GO:0005525];hydrolase activity [GO:0016787]	2	0.0098522	1.4802	16	1.7	5.8	1.7	1.7	B9DFZ2	B9DFZ2	441	MCK7.24	AT5G58370 protein
303367099761963	302319202423096	303283882141113	302613658905029	ribosomal small subunit assembly [GO:0000028];translation [GO:0006412]	cytosolic small ribosomal subunit [GO:0022627]	structural constituent of ribosome [GO:0003735]	24	0	323.31	791	50	56.8	58.5	50.3	B9DG17	B9DG17	442	P40	40S ribosomal protein SA
276171588897705	277947025299072	275227546691895	276530780792236			transferase activity, transferring acyl groups [GO:0016746]	9	0	22.653	43	25.1	22.1	22.1	29.3	B9DG63	B9DG63	443	At4g28030	AT4G28030 protein
326806640625	326427192687988	327090072631836	32665641784668	acetate metabolic process [GO:0006083];acetyl-CoA biosynthetic process from acetate [GO:0019427];fatty acid metabolic process [GO:0006631]	chloroplast [GO:0009507];chloroplast stroma [GO:0009570];cytosol [GO:0005829];glyoxysome [GO:0009514]	acetate-CoA ligase activity [GO:0003987];AMP binding [GO:0016208];ATP binding [GO:0005524]	59	0	323.31	890	60	56	57.2	58.4	B9DGD6	B9DGD6	444	ACS	Acetyl-coenzyme A synthetase, chloroplastic/glyoxysomal
244987487792969	246489429473877	248454151153564	249294929504395				4	0	5.3129	6	16.7	5.2	4.4	21.8	B9DGS8	B9DGS8	445	At1g14820	AT1G14820 protein
331497993469238	331492385864258	331709136962891	331505699157715	microtubule-based process [GO:0007017]	cytoplasm [GO:0005737];microtubule [GO:0005874]	GTP binding [GO:0005525];GTPase activity [GO:0003924];structural constituent of cytoskeleton [GO:0005200]	53	0	323.31	1476	72	63.8	72.2	69.3	B9DGT7	B9DGT7	446	TUBA2	Tubulin alpha-2 chain
27258358001709	275092239379883	275763626098633	274404716491699	thiamine diphosphate biosynthetic process [GO:0009229];thiamine metabolic process [GO:0006772]	cytosol [GO:0005829]	ATP binding [GO:0005524];kinase activity [GO:0016301];thiamine binding [GO:0030975];thiamine diphosphokinase activity [GO:0004788]	10	0	83.605	78	22.5	24	24	33	B9DGU7	B9DGU7	447	TPK1	Thiamine pyrophosphokinase 1
316717700958252	316264495849609	316206932067871	315994777679443	methylglyoxal catabolic process to D-lactate via S-lactoyl-glutathione [GO:0019243];response to cadmium ion [GO:0046686]	chloroplast [GO:0009507];cytosol [GO:0005829];extracellular region [GO:0005576]	lactoylglutathione lyase activity [GO:0004462];metal ion binding [GO:0046872]	24	0	323.31	417	68.5	68.5	63	67.2	B9DH52	B9DH52	448	At1g08110	Lactoylglutathione lyase
249949855804443	253803043365479	249707069396973	254651317596436	coenzyme A biosynthetic process [GO:0015937]	cytosol [GO:0005829];nucleus [GO:0005634]	pantothenate kinase activity [GO:0004594]	15	0	10.11	15	25.2	23.5	33	26	B9DH75	B9DH75	449	At2g17320	AT2G17320 protein
247214546203613	246897125244141	245951404571533	245413818359375	endoplasmic reticulum membrane organization [GO:0090158];endoplasmic reticulum-plasma membrane tethering [GO:0061817];intracellular transport [GO:0046907];viral process [GO:0016032]	endoplasmic reticulum membrane [GO:0005789];extracellular region [GO:0005576];integral component of membrane [GO:0016021];plasma membrane [GO:0005886]		2	0.0048886	1.8544	16	2.3	2.3	2.3	2.3	B9DHD7	B9DHD7	451	PVA22	Vesicle-associated protein 2-2
313912563323975	314856777191162	315470600128174	317448291778564	microtubule-based process [GO:0007017]	cytoplasm [GO:0005737];microtubule [GO:0005874]	GTP binding [GO:0005525];GTPase activity [GO:0003924];structural constituent of cytoskeleton [GO:0005200]	45	0	323.31	551	73.6	65.8	72.4	70	B9DHQ0	B9DHQ0	453	TUBA5	Tubulin alpha-5 chain
265602550506592	267485523223877	264191665649414	266058311462402		integral component of membrane [GO:0016021];plasma membrane [GO:0005886]	ATP binding [GO:0005524];protein serine/threonine kinase activity [GO:0004674]	9	0	15.894	49	4.4	4.1	4.9	4.1	C0LGD7	C0LGD7	454	At1g06840	Probable LRR receptor-like serine/threonine-protein kinase At1g06840
280011520385742	271318302154541	279611873626709	27533561706543		integral component of membrane [GO:0016021];membrane [GO:0016020];plasma membrane [GO:0005886]	ATP binding [GO:0005524];protein serine/threonine kinase activity [GO:0004674]	4	0.00094056	2.4799	26	1.7	3.1	3.1	1.7	C0LGE4	C0LGE4	455	At1g12460	Probable LRR receptor-like serine/threonine-protein kinase At1g12460
261136245727539	260066089630127	259898414611816	264045600891113	protein autophosphorylation [GO:0046777]	integral component of membrane [GO:0016021];plasma membrane [GO:0005886]	ATP binding [GO:0005524];protein serine/threonine kinase activity [GO:0004674]	8	0	8.9923	25	4.3	3.3	5.3	4.2	C0LGG8	C0LGG8	456	At1g53430	Probable LRR receptor-like serine/threonine-protein kinase At1g53430
257804660797119	263098373413086	256863231658936	254321155548096	protein autophosphorylation [GO:0046777]	integral component of membrane [GO:0016021];plasma membrane [GO:0005886]	ATP binding [GO:0005524];protein serine/threonine kinase activity [GO:0004674]	6	0	14.433	32	0.9	0.9	0.9	2.9	C0LGH3	C0LGH3	457	At1g56140	Probable LRR receptor-like serine/threonine-protein kinase At1g56140
271289825439453	27184139251709	27583911895752	276545810699463	jasmonic acid and ethylene-dependent systemic resistance [GO:0009861];protein autophosphorylation [GO:0046777];regulation of innate immune response [GO:0045088]	cytosol [GO:0005829];integral component of membrane [GO:0016021];plasma membrane [GO:0005886];plasmodesma [GO:0009506]	ATP binding [GO:0005524];protein serine/threonine kinase activity [GO:0004674]	16	0	35.216	70	10	7.7	10.7	9.1	C0LGN2	C0LGN2	459	LRR-RLK	Probable leucine-rich repeat receptor-like serine/threonine-protein kinase At3g14840
280879039764404	283388366699219	279884777069092	282723541259766	actin filament bundle assembly [GO:0051017]		actin filament binding [GO:0051015]	10	0	8.5699	56	10.5	10.5	10.5	13.1	C0Z268	C0Z268	461	FIM1	AT4G26700 protein
268647861480713	270687637329102	270335960388184	268961982727051		chloroplast [GO:0009507]	ferredoxin-NADP+ reductase activity [GO:0004324]	44	0	11.126	32	89.4	89	89.4	89.4	C0Z2A8	C0Z2A8	464	FNR2	Ferredoxin--NADP reductase, chloroplastic
278731441497803	280113735198975	281323699951172	279460353851318		cytosol [GO:0005829];extracellular region [GO:0005576];plasma membrane [GO:0005886]	hydrolase activity [GO:0016787]	10	0	38.334	85	37.6	29.8	38	38	C0Z2J1	C0Z2J1	465	At1g11360	AT1G11360 protein
248000087738037	24551685333252	247275943756104	248122539520264		nucleus [GO:0005634]	DNA binding [GO:0003677]	3	0.0048913	1.8599	17	7.5	7.5	7.5	7.5	C0Z2P1	C0Z2P1	466	At1g74840	AT1G74840 protein
284384517669678	285836238861084	28520320892334	28479850769043	chaperone cofactor-dependent protein refolding [GO:0051085];protein folding [GO:0006457];protein refolding [GO:0042026]	chloroplast [GO:0009507];chloroplast stroma [GO:0009570];cytosol [GO:0005829];cytosolic ribosome [GO:0022626];mitochondrion [GO:0005739];plastid [GO:0009536]	ATP binding [GO:0005524]	79	0	323.31	343	54.3	65.2	58.1	58.3	C0Z361	C0Z361	468	CPN60B3	Chaperonin 60 subunit beta 3, chloroplastic
26237922668457	245043983459473	257737922668457	228902263641357		cytosol [GO:0005829]	metal ion binding [GO:0046872];metalloendopeptidase activity [GO:0004222]	39	0	226.35	149	11.3	6.1	11.6	4.3	F4HNU6	F4HNU6	519	At1g06900	Nardilysin-like
255035495758057	248965682983398	234262409210205	NaN			ATP binding [GO:0005524];protein kinase activity [GO:0004672]	10	0	30.593	36	4	1	1.2	0	F4HPS0	F4HPS0	522	ATMAP4K ALPHA1	Protein kinase superfamily protein
267319507598877	267475280761719	267784385681152	267125339508057	peptidyl-serine phosphorylation [GO:0018105];peptidyl-threonine phosphorylation [GO:0018107]	cytoplasm [GO:0005737];cytosol [GO:0005829];plasma membrane [GO:0005886]	ATP binding [GO:0005524];protein serine/threonine kinase activity [GO:0004674]	14	0	49.915	36	1.1	1.1	1.1	1.1	F4HQ88	F4HQ88	525	At1g73460	Protein kinase superfamily protein
252225456237793	260809898376465	256483135223389	261372737884521	flower development [GO:0009908];histone methylation [GO:0016571];negative regulation of flower development [GO:0009910];transcription elongation from RNA polymerase II promoter [GO:0006368]	Cdc73/Paf1 complex [GO:0016593];nucleus [GO:0005634];transcriptionally active chromatin [GO:0035327]	chromatin binding [GO:0003682];RNA polymerase II complex binding [GO:0000993]	7	0	6.3469	20	4.1	2	2	2	F4HQA1	F4HQA1	526	VIP2	Protein PAF1 homolog
275062007904053	274229412078857	275461311340332	270948657989502			hydrolase activity [GO:0016787]	8	0	12.366	42	23.3	15.9	23.3	14.4	F4HQA8	F4HQA8	527	FHY1	Haloacid dehalogenase-like hydrolase (HAD) superfamily protein
310536193847656	31015645980835	311243553161621	310999279022217		cell wall [GO:0005618];cytosol [GO:0005829];mitochondrion [GO:0005739];nucleus [GO:0005634];plasma membrane [GO:0005886];plasmodesma [GO:0009506]	ATP binding [GO:0005524]	116	0	323.31	732	86.6	83.9	86	81.9	F4HQD4	F4HQD4	528	HSP70-15	Heat shock 70 kDa protein 15
30908634185791	293247871398926	304321117401123	304197101593018	chloroplast rRNA processing [GO:1901259];regulation of RNA metabolic process [GO:0051252]	chloroplast [GO:0009507];chloroplast envelope [GO:0009941];chloroplast stroma [GO:0009570];chloroplast thylakoid membrane [GO:0009535];nucleus [GO:0005634];plastid [GO:0009536];ribonucleoprotein complex [GO:1990904]	mRNA binding [GO:0003729];RNA binding [GO:0003723]	25	0	150.77	293	47.3	47.6	47.6	48.3	F4HQH8	F4HQH8	530	At1g01080	RNA-binding (RRM/RBD/RNP motifs) family protein
342591896057129	342887077331543	343179016113281	342300605773926			nucleotide binding [GO:0000166];oxidoreductase activity, acting on the aldehyde or oxo group of donors, NAD or NADP as acceptor [GO:0016620]	70	0	323.31	1302	88.4	88.4	88.4	88.4	F4HQT1	F4HQT1	531	GAPC2	Glyceraldehyde-3-phosphate dehydrogenase C2
214913539886475	NaN	NaN	229401817321777				12	0	25.408	62	1.9	0	0	1.9	F4HQZ1	F4HQZ1	532	At1g19880	Regulator of chromosome condensation (RCC1) family protein
291954956054688	289878005981445	291039714813232	294497489929199				23	0	160.2	179	32.8	36.2	33.1	37.9	F4HR91	F4HR91	533	At1g33610	Leucine-rich repeat (LRR) family protein
223996829986572	228185081481934	230951805114746	226944484710693				1	0.0013077	2.3395	6	5.9	5.9	5.9	5.9	F4HRD2	F4HRD2	534	At1g45230	DCL protein (DUF3223)
224144687652588	NaN	221637382507324	220056972503662				3	0	9.5236	16	4	0	4	4	F4HRG2	F4HRG2	535	At1g53345	DHHA1 domain protein
262233200073242	257156791687012	271064949035645	284814682006836	carbohydrate metabolic process [GO:0005975];ethylene biosynthetic process [GO:0009693];regulation of ethylene biosynthetic process [GO:0010364];regulation of leaf senescence [GO:1900055];starch metabolic process [GO:0005982];trehalose metabolic process [GO:0005991]	cytosol [GO:0005829]		24	0	65.442	66	1.7	1.4	0.8	0.4	F4HRS2	F4HRS2	537	SWEETIE	Protein SWEETIE
226766986846924	217486591339111	275169811248779	230940361022949	nucleus organization [GO:0006997];regulation of nucleus size [GO:0097298]	cytoplasmic chromatin [GO:0000789];cytosol [GO:0005829];mitochondrion [GO:0005739];nuclear envelope [GO:0005635];nuclear lamina [GO:0005652];nuclear membrane [GO:0031965];nuclear periphery [GO:0034399];nucleoplasm [GO:0005654];nucleus [GO:0005634]		30	0	110.28	97	2.5	1.8	1.3	2.5	F4HRT5	F4HRT5	538	CRWN1	Protein CROWDED NUCLEI 1
308856925964355	30796142578125	308552665710449	30775333404541	carbohydrate metabolic process [GO:0005975];glycerol-3-phosphate metabolic process [GO:0006072]		glycerol kinase activity [GO:0004370]	47	0	323.31	625	67.8	66	61.2	62.4	F4HS76	F4HS76	539	NHO1	Actin-like ATPase superfamily protein
303439273834229	296019420623779	295863304138184	30059175491333		cytoplasm [GO:0005737];cytosol [GO:0005829];extracellular region [GO:0005576];nucleus [GO:0005634]		49	0	161.2	282	17.8	17.6	21.8	21.8	F4HS99	F4HS99	540	At1g01320	Tetratricopeptide repeat (TPR)-like superfamily protein
231932048797607	NaN	23325532913208	260468311309814	tRNA pseudouridine synthesis [GO:0031119]		pseudouridine synthase activity [GO:0009982];RNA binding [GO:0003723]	8	0	17.903	30	5	0	3.4	1.6	F4HSS8	F4HSS8	543	At1g20410	Pseudouridine synthase family protein
258001079559326	258136005401611	260402393341064	259281158447266	negative regulation of defense response to bacterium, incompatible interaction [GO:1902478]		GTP binding [GO:0005525]	5	0	14.688	24	10.2	10.2	12.6	12.6	F4HT21	F4HT21	545	IAN9	Immune-associated nucleotide-binding protein 9
NaN	245100841522217	NaN	243858757019043	DNA replication initiation [GO:0006270]	alpha DNA polymerase:primase complex [GO:0005658];mitochondrion [GO:0005739]	DNA binding [GO:0003677]	14	0	30.691	36	2.6	1.9	0	4.4	F4HTP2	F4HTP2	546	POLA2	DNA polymerase alpha subunit B
241852550506592	241717300415039	234808673858643	236479015350342				3	0	5.6952	16	1.5	4.4	1.5	4.4	F4HTR6	F4HTR6	548	At1g67800	Copine (Calcium-dependent phospholipid-binding protein) family
308447570800781	300253829956055	310255794525146	308369560241699		chloroplast [GO:0009507];chloroplast thylakoid [GO:0009534];mitochondrion [GO:0005739]	peptidyl-prolyl cis-trans isomerase activity [GO:0003755]	19	0	261.34	180	41.3	41.3	35	43.8	F4HTT6	F4HTT6	549	CYP26-2	Peptidyl-prolyl cis-trans isomerase CYP26-2, chloroplastic
249714527130127	239849414825439	247294635772705	253187580108643	endoplasmic reticulum to Golgi vesicle-mediated transport [GO:0006888]	cytoplasm [GO:0005737];mitochondrion [GO:0005739];nucleus [GO:0005634];TRAPP complex [GO:0030008]		4	0	5.8748	12	11.1	8.9	11.1	11.1	F4HTY0	F4HTY0	550	At1g80500	SNARE-like superfamily protein
28875020980835	288664093017578	288353004455566	289943695068359	acyl-CoA metabolic process [GO:0006637];fatty acid catabolic process [GO:0009062]	peroxisome [GO:0005777]	acyl-CoA hydrolase activity [GO:0047617]	20	0	64.273	207	39.3	39.6	37.2	32.1	F4HU51	F4HU51	551	At1g01710	Acyl-CoA thioesterase II
281775016784668	283315505981445	285614719390869	288366546630859	peptidyl-lysine monomethylation [GO:0018026]		protein-lysine N-methyltransferase activity [GO:0016279]	7	0	12.231	36	3.8	3.8	3.8	3.8	F4HU79	F4HU79	552	At1g01920	SET domain-containing protein
275736923217773	277422046661377	2749853515625	274462432861328	RNA catabolic process [GO:0006401]	extracellular region [GO:0005576];secretory vesicle [GO:0099503]	endoribonuclease activity [GO:0004521];ribonuclease T2 activity [GO:0033897];RNA binding [GO:0003723]	12	0	59.881	120	35.2	23.1	32	36	F4HUG9	F4HUG9	554	At1g14210	Ribonuclease T2 family protein
254761161804199	233125743865967	250195407867432	247032432556152	fatty acid metabolic process [GO:0006631]	peroxisome [GO:0005777]	ligase activity [GO:0016874]	8	0	7.277	32	4.7	3.1	3.8	1.6	F4HUK6	F4HUK6	555	AAE1	Probable acyl-activating enzyme 1, peroxisomal
297557468414307	297169723510742	312890110015869	313133811950684				10	0	6.5554	19	0.8	1.6	1.6	2.5	F4HV50;REV__F4HV50	F4HV50	557	At1g47900	Filament-like protein (DUF869)
241531372070313	236563282012939	240960330963135	NaN		plasma membrane [GO:0005886]	mRNA binding [GO:0003729]	14	0	36.352	15	16	16.3	15.6	14.7	F4HV67	F4HV67	558	UBP1A	Oligouridylate-binding protein 1A
255894088745117	259818744659424	255867767333984	258513622283936			ATP binding [GO:0005524];helicase activity [GO:0004386];nucleic acid binding [GO:0003676]	50	0	243.24	100	58	63.4	56.5	58.5	F4HV96	F4HV96	559	EIF4A-2	Eif4a-2
261572284698486	256607398986816	266130180358887	261559181213379	detection of redox state [GO:0051776];photosystem stoichiometry adjustment [GO:0080005];protein autophosphorylation [GO:0046777];regulation of gene expression [GO:0010468];regulation of photosynthesis [GO:0010109]	chloroplast [GO:0009507];chloroplast stroma [GO:0009570]	kinase activity [GO:0016301];protein histidine kinase activity [GO:0004673];protein self-association [GO:0043621];quinone binding [GO:0048038]	7	0	36.094	33	9.7	5.1	11.1	6.5	F4HVG8	F4HVG8	560	CSK	Chloroplast sensor kinase, chloroplastic
202977085113525	NaN	NaN	224063415527344	regulation of translation [GO:0006417]	CCR4-NOT core complex [GO:0030015]		73	0	323.31	340	0.4	0	0	0.6	F4HVV7;REV__F4JCM5	F4HVV7	561	At1g02080	Transcription regulator
25577615737915	25820629119873	265961933135986	267150249481201		cytosol [GO:0005829]	mRNA binding [GO:0003729]	11	0	21.479	30	4.5	4.5	2.5	2.5	F4HWB0	F4HWB0	563	At1g14710	Hydroxyproline-rich glycoprotein family protein
279481544494629	278974685668945	277633819580078	280094528198242		integral component of membrane [GO:0016021];plasma membrane [GO:0005886];vacuole [GO:0005773]	mRNA binding [GO:0003729]	17	0	26.125	118	7.5	7.2	7.3	4.4	F4HWC3	F4HWC3	564	At1g20970	Calponin-like domain protein
297585773468018	298845138549805	299335403442383	299171257019043	tRNA aminoacylation for protein translation [GO:0006418]	cytosol [GO:0005829]	ATP binding [GO:0005524];tyrosine-tRNA ligase activity [GO:0004831]	39	0	113.02	286	29.4	21.5	28.9	25.3	F4HWL4	F4HWL4	566	At1g28350	Tyrosine--tRNA ligase 2, cytoplasmic
NaN	NaN	247397480010986	24753381729126			mRNA binding [GO:0003729]	7	0	15.692	17	0	0	1.6	1.6	F4HWS5	F4HWS5	567	ECT7	Evolutionarily conserved C-terminal region 7
295401744842529	29508129119873	293336639404297	294695243835449	endosome to plasma membrane protein transport [GO:0099638];multivesicular body organization [GO:0036257];protein transport to vacuole involved in ubiquitin-dependent protein catabolic process via the multivesicular body sorting pathway [GO:0043328];vacuole organization [GO:0007033]	cytoplasm [GO:0005737];cytosol [GO:0005829];late endosome [GO:0005770];multivesicular body [GO:0005771];plasmodesma [GO:0009506]	protein self-association [GO:0043621];ubiquitin binding [GO:0043130]	46	0	280.6	370	32.5	29.7	27.9	29.3	F4HXZ1	F4HXZ1	569	BRO1	Vacuolar-sorting protein BRO1
257959785461426	267883052825928	270839557647705	NaN	embryo development ending in seed dormancy [GO:0009793];protein import [GO:0017038];protein targeting [GO:0006605]	chloroplast envelope [GO:0009941];membrane [GO:0016020];plastid [GO:0009536]	ATP binding [GO:0005524];metal ion binding [GO:0046872]	6	0.0013079	2.3436	21	1.1	1.1	1.1	0	F4HY36	F4HY36	570	SECA2	Protein translocase subunit SecA
28229585647583	290378437042236	283219947814941	289541301727295				15	0	77.768	50	2.8	0.7	2.8	0.7	F4HYA7	F4HYA7	571	At1g35220	FAM91 carboxy-terminus protein
229212532043457	237340717315674	NaN	236888046264648		cytoplasm [GO:0005737];nucleus [GO:0005634];perinuclear region of cytoplasm [GO:0048471]		8	0	21.227	26	1.3	1.3	0	3	F4HYD7	F4HYD7	572	RANBPM	Ran-binding protein M homolog
316067314147949	317408542633057	317779598236084	31743465423584	D-cysteine catabolic process [GO:0019447];ethylene biosynthetic process [GO:0009693];response to cadmium ion [GO:0046686]	chloroplast [GO:0009507];cytosol [GO:0005829];mitochondrion [GO:0005739];nucleus [GO:0005634]	cobalt ion binding [GO:0050897];D-cysteine desulfhydrase activity [GO:0019148];hydrolase activity [GO:0016787]	30	0	323.31	444	61.6	59.4	60.8	59.4	F4HYF3	F4HYF3	573	DCD	Bifunctional D-cysteine desulfhydrase/1-aminocyclopropane-1-carboxylate deaminase, mitochondrial
283170433044434	276015872955322	273826141357422	287168579101563			ATP binding [GO:0005524]	20	0	8.4414	32	1.1	1.1	2.5	2.5	F4HZ82	F4HZ82	575	At1g02890	AAA-type ATPase family protein
30282398223877	301844711303711	302993106842041	303278522491455		chloroplast [GO:0009507];chloroplast envelope [GO:0009941];chloroplast stroma [GO:0009570];extracellular region [GO:0005576];mitochondrion [GO:0005739];plastid stroma [GO:0009532];thylakoid [GO:0009579]	serine-type endopeptidase activity [GO:0004252]	18	0	298.47	187	33.5	37.6	34.3	32.2	F4HZE0	F4HZE0	577	At1g09130	ATP-dependent Clp protease proteolytic subunit
252091064453125	247868099212646	251548366546631	253098373413086	protein stabilization [GO:0050821];proteolysis [GO:0006508]	mitochondrion [GO:0005739];nucleus [GO:0005634]	aminopeptidase activity [GO:0004177];manganese ion binding [GO:0030145];metallopeptidase activity [GO:0008237];peptidase activity [GO:0008233]	6	0	15.601	39	11.4	9.1	12.2	12.2	F4HZG9	F4HZG9	578	ICP55	Intermediate cleaving peptidase 55, mitochondrial
NaN	228345489501953	NaN	216131973266602		vacuole [GO:0005773]		13	0	22.572	45	0	1.4	0	0.8	F4HZS8	F4HZS8	580	At1g22060	Sporulation-specific protein
251986923217773	252197418212891	253256015777588	257399272918701		host cell nucleus [GO:0042025];nucleus [GO:0005634]	zinc ion binding [GO:0008270]	6	0	13.975	48	4.4	4.4	5.9	4.4	F4I045	F4I045	582	At1g48950	C3HC zinc finger-like protein
251463146209717	25832483291626	264870014190674	253588390350342	2-oxoglutarate metabolic process [GO:0006103];aspartate metabolic process [GO:0006531];biosynthetic process [GO:0009058];cellular amino acid metabolic process [GO:0006520];glutamate metabolic process [GO:0006536]	cytoplasm [GO:0005737];cytosol [GO:0005829];nucleus [GO:0005634]	L-aspartate:2-oxoglutarate aminotransferase activity [GO:0004069];pyridoxal phosphate binding [GO:0030170]	19	0	101.64	88	7.7	9.1	8.6	8.1	F4I0D4;P46646	F4I0D4	583	ASP4	Aspartate aminotransferase;Aspartate aminotransferase, cytoplasmic isozyme 2
270218925476074	265599784851074	268611221313477	269823970794678				9	0	5.2429	39	5.4	7.9	7.3	4.4	F4I0I6	F4I0I6	584	At1g69030	BSD domain-containing protein
NaN	249021453857422	NaN	238522434234619	chloroplast organization [GO:0009658];etioplast organization [GO:0009662];plastid transcription [GO:0042793];regulation of transcription, DNA-templated [GO:0006355]	chloroplast nucleoid [GO:0042644];cytoplasm [GO:0005737];plastid-encoded plastid RNA polymerase complex [GO:0000427]	carbohydrate kinase activity [GO:0019200]	3	0	3.3802	13	2	1.5	2	2.8	F4I0K2	F4I0K2	585	FLN2	Fructokinase-like 2, chloroplastic
263930644989014	267114849090576	265658283233643	26524055480957				3	0	10.351	22	11.3	24.7	11.3	11.3	F4I0N7	F4I0N7	586	GASA1	GAST1 protein homolog 1
294954509735107	295564365386963	295399703979492	295316295623779	leucyl-tRNA aminoacylation [GO:0006429]	chloroplast [GO:0009507];cytosol [GO:0005829];plasmodesma [GO:0009506]	aminoacyl-tRNA editing activity [GO:0002161];ATP binding [GO:0005524];leucine-tRNA ligase activity [GO:0004823]	109	0	323.31	845	31.1	38.7	27.1	29	F4I116	F4I116	588	At1g09620	Leucine--tRNA ligase, cytoplasmic
257369632720947	261026344299316	260084915161133	260569095611572		nucleus [GO:0005634]	mRNA binding [GO:0003729]	18	0	237.15	142	4.9	5.3	2.8	2.8	F4I1G1	F4I1G1	589	At1g29350	RNA polymerase II degradation factor-like protein (DUF1296)
267182960510254	233086929321289	222607498168945	265998859405518	histone acetylation [GO:0016573];regulation of DNA demethylation [GO:1901535];regulation of DNA methylation [GO:0044030]			16	0	41.514	64	2.7	1.5	1.2	1.5	F4I1S8	F4I1S8	591	ELP2	Elongator protein 2
232328052520752	NaN	233120212554932	237602005004883	embryo development ending in seed dormancy [GO:0009793];mRNA transport [GO:0051028];protein import into nucleus [GO:0006606];RNA export from nucleus [GO:0006405];zygote asymmetric cell division [GO:0010070]	mitochondrion [GO:0005739];nuclear pore central transport channel [GO:0044613];nuclear pore nuclear basket [GO:0044615]	nuclear localization sequence binding [GO:0008139];structural constituent of nuclear pore [GO:0017056]	2	0	3.6518	7	0.9	0.9	1.8	1.8	F4I1T7	F4I1T7	592	NUP214	Nuclear pore complex protein NUP214
317809352874756	317388019561768	317379970550537	318509159088135		chloroplast [GO:0009507];cytoplasm [GO:0005737];cytosol [GO:0005829];mitochondrion [GO:0005739]	endopeptidase activity [GO:0004175];oligopeptidase activity [GO:0070012];serine-type endopeptidase activity [GO:0004252];serine-type exopeptidase activity [GO:0070008]	53	0	323.31	848	53.5	51.9	46.7	49.9	F4I2A0	F4I2A0	593	At1g76140	Prolyl oligopeptidase family protein
NaN	251505813598633	244648208618164	246772899627686	pseudouridine synthesis [GO:0001522];tRNA processing [GO:0008033]		pseudouridine synthase activity [GO:0009982];RNA binding [GO:0003723];tRNA pseudouridine synthase activity [GO:0106029]	4	0	3.1533	10	0	3.8	3.2	3.2	F4I2L0	F4I2L0	596	At1g09800	tRNA pseudouridine synthase
259629859924316	256154613494873	25980676651001	258130855560303		cytosol [GO:0005829]	hydrolase activity [GO:0016787]	9	0	6.0555	20	22.4	21.8	25	30.8	F4I353	F4I353	600	At1g29840	Alpha/beta-Hydrolases superfamily protein
254305210113525	251577301025391	25638126373291	25693359375	cellular response to heat [GO:0034605];mRNA processing [GO:0006397]	cytoplasmic stress granule [GO:0010494];cytosol [GO:0005829];nucleus [GO:0005634]	mRNA binding [GO:0003729];poly(A) binding [GO:0008143]	14	0	323.31	88	10.1	10.3	10.3	7.9	F4I3B3	F4I3B3	603	RBP47A	Polyadenylate-binding protein RBP47A
297146167755127	29600170135498	296556739807129	296525135040283	response to oxidative stress [GO:0006979]	mitochondrion [GO:0005739];nucleus [GO:0005634];peroxisome [GO:0005777]	oxidoreductase activity [GO:0016491];zinc ion binding [GO:0008270]	31	0	107.99	265	39.9	31.3	35	31.1	F4I3C3	F4I3C3	604	NQR	ARP protein (REF)
317845668792725	316188125610352	317878379821777	319630966186523		chloroplast [GO:0009507];chloroplast stroma [GO:0009570];cytoplasm [GO:0005737];nucleus [GO:0005634]	ATP binding [GO:0005524];ATPase activity [GO:0016887];GTP binding [GO:0005525];ribosomal large subunit binding [GO:0043023];ribosome binding [GO:0043022]	30	0	323.31	480	76.5	76.5	68.9	65.8	F4I3J0	F4I3J0	605	At1g56050	Obg-like ATPase 1
347743606567383	347775497436523	34847541809082	348629531860352	response to cadmium ion [GO:0046686]	apoplast [GO:0048046];chloroplast [GO:0009507];chloroplast envelope [GO:0009941];chloroplast stroma [GO:0009570];cytosol [GO:0005829];nucleus [GO:0005634];plasma membrane [GO:0005886];vacuole [GO:0005773]	metallopeptidase activity [GO:0008237];zinc ion binding [GO:0008270]	119	0	323.31	2778	80.3	81.9	84.7	80	F4I3R1	F4I3R1	608	At1g63770	Peptidase M1 family protein
313218994140625	311407165527344	313242073059082	314248733520508		mitochondrion [GO:0005739];plasma membrane [GO:0005886]	GTP binding [GO:0005525];GTPase activity [GO:0003924];translation initiation factor activity [GO:0003743]	44	0	323.31	285	21.5	17.5	18.7	14.9	F4I420	F4I420	609	At1g76810	Eukaryotic translation initiation factor 2 (eIF-2) family protein
262990627288818	263344440460205	261395587921143	261717491149902			Hsp90 protein binding [GO:0051879]	8	0	11.221	30	17.2	11.4	13.9	6.7	F4I456	F4I456	610	TPR2	Tetratricopeptide repeat (TPR)-like superfamily protein
233099422454834	231572437286377	234712238311768	232944583892822		plasma membrane [GO:0005886]	S100 protein binding [GO:0044548];tubulin binding [GO:0015631];ubiquitin protein ligase binding [GO:0031625]	2	0	3.8032	9	6.1	4.4	6.1	10.5	F4I4Q9	F4I4Q9	612	At1g30070	SGS domain-containing protein
263657970428467	262604236602783	26191707611084	264721698760986			ATP binding [GO:0005524];protein serine/threonine kinase activity [GO:0004674];protein-containing complex binding [GO:0044877]	14	0	28.246	33	0.7	0.7	0.7	0.7	F4I4X6	F4I4X6	613	TOR	Serine/threonine-protein kinase TOR
26348611831665	271496715545654	266401691436768	272095527648926	ubiquitin-dependent protein catabolic process [GO:0006511]	cytosol [GO:0005829];plasma membrane [GO:0005886]	ATP binding [GO:0005524];ubiquitin-protein transferase activity [GO:0004842]	8	0	26.836	28	40.5	40.5	35.8	40.5	F4I5B8	F4I5B8	616	UBC28	Ubiquitin-conjugating enzyme 28
283180351257324	281691608428955	281280975341797	281313877105713	DNA repair [GO:0006281];mRNA splicing, via spliceosome [GO:0000398]	Prp19 complex [GO:0000974]	ubiquitin protein ligase activity [GO:0061630]	28	0	91.359	175	28.5	21.4	25.8	17	F4I5P3	F4I5P3	617	MAC3A	MOS4-associated complex 3A
250989665985107	2525537109375	254638233184814	25716516494751	regulation of phosphoprotein phosphatase activity [GO:0043666]	vacuolar membrane [GO:0005774]	protein phosphatase binding [GO:0019903];protein phosphatase regulator activity [GO:0019888]	35	0	205.66	167	1.7	1.7	1.7	3.2	F4I6B2	F4I6B2	619	At1g30470	SIT4 phosphatase-associated family protein
262872009277344	262317295074463	230571041107178	230845794677734	CTP biosynthetic process [GO:0006241];'de novo' CTP biosynthetic process [GO:0044210];glutamine metabolic process [GO:0006541];pyrimidine nucleobase biosynthetic process [GO:0019856]	cytosol [GO:0005829]	ATP binding [GO:0005524];CTP synthase activity [GO:0003883];identical protein binding [GO:0042802]	24	0	78.977	91	2	2	6.3	6.8	F4I6G9	F4I6G9	620	At1g30820	CTP synthase
334866371154785	334612426757813	334404792785645	333957328796387	biosynthetic process [GO:0009058];cellular response to hypoxia [GO:0071456];L-alanine catabolic process, by transamination [GO:0019481];response to cadmium ion [GO:0046686];response to hypoxia [GO:0001666]	mitochondrion [GO:0005739];nucleus [GO:0005634]	ATP binding [GO:0005524];L-alanine:2-oxoglutarate aminotransferase activity [GO:0004021];pyridoxal phosphate binding [GO:0030170]	48	0	323.31	1108	54.9	55.8	51.7	52.1	F4I7I0	F4I7I0	623	ALAAT1	Alanine aminotransferase 1, mitochondrial
308168830871582	308025493621826	309451007843018	3090505027771	iron ion homeostasis [GO:0055072];iron ion transport [GO:0006826]	apoplast [GO:0048046];cell wall [GO:0005618];plasma membrane [GO:0005886];plasmodesma [GO:0009506];secretory vesicle [GO:0099503]	copper ion binding [GO:0005507];ferroxidase activity [GO:0004322]	20	0	222.07	272	23.1	24.9	29.2	30.4	F4I7X1	F4I7X1	624	SKS6	SKU5-similar 6
247363967895508	241238422393799	247562847137451	246197490692139	cell wall organization [GO:0071555]	extracellular region [GO:0005576];plant-type cell wall [GO:0009505]	carboxylic ester hydrolase activity [GO:0052689];pectin acetylesterase activity [GO:0052793]	5	0	5.8026	14	5.6	4.1	5.6	5.6	F4I839	F4I839	625	PAE2	Pectin acetylesterase 2
25892427444458	276374778747559	266683082580566	271918773651123	reciprocal meiotic recombination [GO:0007131]	chloroplast [GO:0009507];microtubule associated complex [GO:0005875]		30	0	67.882	95	3.8	4.7	3.3	4.5	F4I8B9	F4I8B9	626	At1g65010	Putative WEB family protein At1g65010, chloroplastic
313187236785889	314319629669189	320868301391602	314391651153564		chloroplast [GO:0009507];chloroplast stroma [GO:0009570]	glyoxylate reductase (NADP) activity [GO:0030267];NAD binding [GO:0051287];NADP binding [GO:0050661];oxidoreductase activity, acting on the CH-OH group of donors, NAD or NADP as acceptor [GO:0016616]	31	0	323.31	396	73.2	72.9	72.3	65.4	F4I907	F4I907	628	GLYR2	Glyoxylate/succinic semialdehyde reductase 2, chloroplastic
265796031951904	264885959625244	263034400939941	265840549468994	regulation of transcription, DNA-templated [GO:0006355]	nucleus [GO:0005634]	transcription corepressor activity [GO:0003714]	7	0	6.5559	8	1.7	0.8	0.8	0.8	F4I962	F4I962	629	SNL3	SIN3-like 3
265557289123535	247489356994629	266353340148926	266877918243408				21	0	150.97	72	1.3	2.1	1.3	1.3	F4I983	F4I983	630	At1g24300	GYF domain-containing protein
275952682495117	275186328887939	273370513916016	271715965270996	mRNA processing [GO:0006397];mRNA transport [GO:0051028];nuclear-transcribed mRNA catabolic process, nonsense-mediated decay [GO:0000184];positive regulation of gene expression [GO:0010628];regulation of alternative mRNA splicing, via spliceosome [GO:0000381];regulation of translation [GO:0006417];RNA splicing [GO:0008380]	cytoplasm [GO:0005737];cytosol [GO:0005829];exon-exon junction complex [GO:0035145];nuclear body [GO:0016604];nuclear speck [GO:0016607];nucleolus [GO:0005730];nucleoplasm [GO:0005654];nucleus [GO:0005634]	mRNA binding [GO:0003729]	6	0	34.505	86	23.3	23.8	23.8	23.8	F4I9J7	F4I9J7	632	Y14	RNA-binding protein Y14
257288932800293	253387508392334	255671195983887	260426006317139	phosphatidylinositol dephosphorylation [GO:0046856]		hydrolase activity [GO:0016787]	3	0.0020325	2.1656	7	3.2	2.9	2.9	1.5	F4IA20	F4IA20	636	At1g71710	DNAse I-like superfamily protein
245652313232422	2488623046875	246866703033447	247104072570801	adenine salvage [GO:0006168];GMP salvage [GO:0032263];guanine metabolic process [GO:0046098];guanine salvage [GO:0006178];hypoxanthine metabolic process [GO:0046100];IMP salvage [GO:0032264];purine ribonucleoside salvage [GO:0006166];seed germination [GO:0009845]	cytosol [GO:0005829]	guanine phosphoribosyltransferase activity [GO:0052657];hypoxanthine phosphoribosyltransferase activity [GO:0004422];magnesium ion binding [GO:0000287];nucleotide binding [GO:0000166]	3	0	11.851	18	19.2	13.1	19.2	5.6	F4IA25	F4IA25	637	HGPT	Hypoxanthine phosphoribosyltransferase
243545417785645	254663143157959	250387954711914	248797492980957	methylation [GO:0032259]		methyltransferase activity [GO:0008168]	6	0	50.453	10	17.2	17.2	17.2	9.9	F4IA48	F4IA48	638	At1g78150	N-lysine methyltransferase
296767387390137	290251178741455	2973996925354	292460384368896	amine metabolic process [GO:0009308]	nucleus [GO:0005634]	copper ion binding [GO:0005507];primary amine oxidase activity [GO:0008131];quinone binding [GO:0048038]	21	0	89.202	160	26.9	26.6	24.4	25.4	F4IAX0	F4IAX0	644	At1g31690	Amine oxidase
293355598449707	289446392059326	295751190185547	295642547607422		integral component of membrane [GO:0016021];nucleus [GO:0005634]	ATP binding [GO:0005524];protein kinase activity [GO:0004672]	16	0	53.876	115	15.6	15.8	17.1	16.4	F4IB63	F4IB63	646	At1g51805	Leucine-rich repeat protein kinase family protein
28268253326416	280931034088135	282928104400635	283438835144043		chloroplast [GO:0009507];cytoplasm [GO:0005737]	intramolecular transferase activity, phosphotransferases [GO:0016868]	16	0	32.761	121	33.8	31.5	24.2	30.9	F4IBB2	F4IBB2	650	At1g58280	Phosphoglycerate mutase-like protein 2
269202537536621	NaN	266367168426514	263587551116943	oxidation-reduction process [GO:0055114]	nucleus [GO:0005634]		8	0	5.7288	25	9.7	9.7	12	12	F4IBH8	F4IBH8	651	At1g65560	Zinc-binding dehydrogenase family protein
32352897644043	322907981872559	324662132263184	325146293640137			gamma-glutamyl-peptidase activity [GO:0034722]	25	0	323.31	471	59.2	58.3	64.9	64.6	F4IBT7	F4IBT7	652	GGH2	Folate gamma-glutamyl hydrolase
297696228027344	298266429901123	29743953704834	297370376586914	carbohydrate metabolic process [GO:0005975];pentose-phosphate shunt, non-oxidative branch [GO:0009052]	chloroplast [GO:0009507];chloroplast envelope [GO:0009941];chloroplast stroma [GO:0009570];extracellular region [GO:0005576]	sedoheptulose-7-phosphate:D-glyceraldehyde-3-phosphate glyceronetransferase activity [GO:0004801];zinc ion binding [GO:0008270]	22	0	240.92	257	34.9	34.4	35.8	37.2	F4IC59	F4IC59	653	At1g12230	Aldolase superfamily protein
243172760009766	243176898956299	238467063903809	246244411468506	microtubule-based movement [GO:0007018];regulation of microtubule-based process [GO:0032886];root development [GO:0048364]	microtubule [GO:0005874];preprophase band [GO:0009574]	ATP binding [GO:0005524];microtubule binding [GO:0008017];microtubule motor activity [GO:0003777]	5	0	8.442	10	1	1	2.7	1	F4IC87	F4IC87	654	ARK3	Kinesin-like protein
283354759216309	282913188934326	284117126464844	287324676513672		endosome [GO:0005768];Golgi apparatus [GO:0005794];integral component of membrane [GO:0016021];membrane [GO:0016020];plasma membrane [GO:0005886];trans-Golgi network [GO:0005802];vacuole [GO:0005773]		9	0	24.981	103	11.1	12.6	11.1	11.6	F4ICJ5	F4ICJ5	655	At1g25570	Di-glucose binding protein with Leucine-rich repeat domain-containing protein
175849781036377	169607028961182	184100532531738	184897766113281	defense response to fungus [GO:0050832];photomorphogenesis [GO:0009640]	chloroplast thylakoid membrane [GO:0009535];endoplasmic reticulum lumen [GO:0005788];nuclear envelope [GO:0005635];peroxisome [GO:0005777];secretory vesicle [GO:0099503];vacuole [GO:0005773]	calcium ion binding [GO:0005509]	21	0	118.8	56	5.7	3.6	5.7	5.7	F4ICX9	F4ICX9	656	TSA1	TSK-associating protein 1
269452533721924	NaN	273046073913574	276764030456543			transferase activity, transferring acyl groups other than amino-acyl groups [GO:0016747]	4	0	24.133	7	5.1	0	5.1	5.1	F4IDH0	F4IDH0	658	YUP8H12R.39	HXXXD-type acyl-transferase family protein
250438098907471	23360782623291	250232677459717	243947334289551		nucleus [GO:0005634]	chromatin binding [GO:0003682]	13	0	21.155	39	2.3	2.8	2.3	2.7	F4IDJ0	F4IDJ0	659	YUP8H12R.24	Binding protein
251724548339844	NaN	258828067779541	257512626647949		endosome [GO:0005768];Golgi apparatus [GO:0005794];integral component of membrane [GO:0016021];intracellular membrane-bounded organelle [GO:0043231];nucleus [GO:0005634];trans-Golgi network [GO:0005802]	nucleotidyltransferase activity [GO:0016779]	7	0	10.39	15	1.1	0	1.1	1.1	F4IEK8	F4IEK8	665	At1g52780	PII, uridylyltransferase (DUF2921)
NaN	245648250579834	251389541625977	248974914550781	heat acclimation [GO:0010286];multicellular organism development [GO:0007275];nucleosome assembly [GO:0006334];nucleosome positioning [GO:0016584];positive regulation of cellular response to heat [GO:1900036];regulation of gene expression, epigenetic [GO:0040029];regulation of transcription, DNA-templated [GO:0006355];response to heat [GO:0009408]	cytosol [GO:0005829];nucleus [GO:0005634]	chromatin DNA binding [GO:0031490];histone binding [GO:0042393];metal ion binding [GO:0046872];promoter-specific chromatin binding [GO:1990841]	6	0.0059203	1.7121	7	0	1.3	1.3	4.3	F4IF36	F4IF36	666	FGT1	Protein FORGETTER 1
223475971221924	237301368713379	241480236053467	237060928344727	biosynthetic process [GO:0009058];regulation of L-ascorbic acid biosynthetic process [GO:2000082]		nucleotidyltransferase activity [GO:0016779]	18	0	56.238	76	13.3	13.5	15.3	14.3	F4IFA4	F4IFA4	667	At2g04650	ADP-glucose pyrophosphorylase family protein
293363704681396	293658428192139	294134292602539	296887912750244				7	0	46.751	63	38.9	41.4	38.9	47.3	F4IFA9	F4IFA9	668	At2g04690	Pyridoxamine 5'-phosphate oxidase family protein
279511585235596	277694492340088	282072277069092	280795364379883	embryo development ending in seed dormancy [GO:0009793];threonyl-tRNA aminoacylation [GO:0006435];tRNA aminoacylation for protein translation [GO:0006418]	chloroplast [GO:0009507];chloroplast stroma [GO:0009570];mitochondrion [GO:0005739]	aminoacyl-tRNA ligase activity [GO:0004812];ATP binding [GO:0005524];metal ion binding [GO:0046872];threonine-tRNA ligase activity [GO:0004829]	18	0	35.493	81	23.1	21.5	21.8	25.2	F4IFC5	F4IFC5	669	EMB2761	Threonine--tRNA ligase, chloroplastic/mitochondrial 2
256239128112793	256725234985352	255680770874023	253557186126709		nucleus [GO:0005634]	transaminase activity [GO:0008483]	5	0	9.7231	23	7.3	7.3	7.3	9	F4IFD0	F4IFD0	670	At2g04865	Protein MAIN-LIKE 2
269414539337158	272493438720703	270254878997803	273202743530273		cytoplasm [GO:0005737]	aminopeptidase activity [GO:0004177]	29	0	34.355	28	45.9	45.3	56.5	51.4	F4IFH2	F4IFH2	672	PIP	Proline iminopeptidase
237464256286621	24022590637207	236728191375732	245491027832031	endocytic recycling [GO:0032456];endocytosis [GO:0006897];endoplasmic reticulum organization [GO:0007029];endoplasmic reticulum-plasma membrane tethering [GO:0061817];plasma membrane repair [GO:0001778];protein targeting to membrane [GO:0006612];response to cold [GO:0009409];response to mechanical stimulus [GO:0009612];transport of virus in host, cell to cell [GO:0046740]	cortical endoplasmic reticulum [GO:0032541];cytoplasmic side of plasma membrane [GO:0009898];endoplasmic reticulum [GO:0005783];endoplasmic reticulum-plasma membrane contact site [GO:0140268];endosome [GO:0005768];plasma membrane [GO:0005886];plasmodesma [GO:0009506];vacuole [GO:0005773]	phosphatidylinositol phosphate binding [GO:1901981]	4	0	3.2295	9	1.2	1.2	1.2	1.2	F4IFM6	F4IFM6	673	SYTA	Synaptotagmin A
309957046508789	314284725189209	314289207458496	315820369720459		extracellular region [GO:0005576]	serine-type endopeptidase activity [GO:0004252]	40	0	227.41	294	38.2	38.3	40.3	37.7	F4IG09	F4IG09	674	SBT4.1	Subtilisin-like protease SBT4.1
198452606201172	163249893188477	2087477684021	214903755187988				77	0	323.31	381	0.3	0.6	2.2	2	F4IG73	F4IG73	675	BCHC2	BEACH domain-containing protein C2
NaN	290057640075684	29346549987793	296995544433594	mRNA transport [GO:0051028];nuclear pore distribution [GO:0031081];protein import into nucleus [GO:0006606];regulation of transcription, DNA-templated [GO:0006355];RNA export from nucleus [GO:0006405];transcription-dependent tethering of RNA polymerase II gene DNA at nuclear periphery [GO:0000972]	membrane [GO:0016020];nuclear pore outer ring [GO:0031080]	structural constituent of nuclear pore [GO:0017056]	16	0	16.196	31	0.5	0.5	1.5	0.5	F4IGA5	F4IGA5	676	NUP133	Nuclear pore complex protein NUP133
207909812927246	220161437988281	199076538085938	20553186416626		ribosome [GO:0005840]		19	0	200.18	61	12.1	12.1	12.1	12.1	F4IHJ8	F4IHJ8	679	At2g21580	40S ribosomal protein S25
25678768157959	252883815765381	258329906463623	254155769348145	rRNA processing [GO:0006364]	nucleolus [GO:0005730]		8	0	5.5013	26	2.1	1.1	1.1	1.1	F4IHU8	F4IHU8	681	At2g34357	ARM repeat superfamily protein
289090194702148	290315475463867	289995937347412	291137638092041			ATP binding [GO:0005524];protein kinase activity [GO:0004672]	41	0	209.26	297	25.1	22.4	21.8	26.2	F4II29	F4II29	682	CTEXP	Kinase family with ARM repeat domain-containing protein
238416290283203	NaN	236157131195068	NaN			UDP-glycosyltransferase activity [GO:0008194]	38	0	29.378	54	15.8	12.1	12.1	11.9	F4IIG3	F4IIG3	685	UGT73B5	Glycosyltransferase
290053081512451	NaN	249091682434082	NaN	anisotropic cell growth [GO:0051211];anther dehiscence [GO:0009901];cellulose biosynthetic process [GO:0030244];cellulose microfibril organization [GO:0010215];cortical microtubule organization [GO:0043622];gynoecium development [GO:0048467];plant-type primary cell wall biogenesis [GO:0009833];pollen tube development [GO:0048868];pollen wall assembly [GO:0010208];protein localization to cortical …	cellulose synthase complex [GO:0010330];cortical microtubule [GO:0055028];cytoplasm [GO:0005737];cytoplasmic side of plasma membrane [GO:0009898];cytosol [GO:0005829];Golgi apparatus [GO:0005794];microtubule minus-end [GO:0036449];plasma membrane [GO:0005886];plasmodesma [GO:0009506]	microtubule binding [GO:0008017]	73	0	323.31	363	0.6	0	0.4	0	F4IIM1	F4IIM1	686	CSI1	Protein CELLULOSE SYNTHASE INTERACTIVE 1
248710308074951	256171169281006	236976337432861	260141639709473	regulation of phosphoprotein phosphatase activity [GO:0043666]		protein phosphatase binding [GO:0019903];protein phosphatase regulator activity [GO:0019888]	14	0	55.077	41	4.1	1.3	1.3	1.3	F4IIN7	F4IIN7	687	At2g28360	SIT4 phosphatase-associated family protein
309857654571533	310324935913086	310173072814941	30803165435791	carbohydrate metabolic process [GO:0005975]		beta-galactosidase activity [GO:0004565];carbohydrate binding [GO:0030246]	43	0	323.31	354	35.3	36.8	35.7	33.3	F4IIQ3	F4IIQ3	688	BGAL8	Beta-galactosidase
272269248962402	272806510925293	271398525238037	271961040496826	cell cycle [GO:0007049];cell division [GO:0051301];lateral root morphogenesis [GO:0010102];response to auxin [GO:0009733]	cortical microtubule [GO:0055028];phragmoplast [GO:0009524];plasma membrane [GO:0005886];plasmodesma [GO:0009506];preprophase band [GO:0009574]		23	0	33.241	92	7.8	7.3	7.2	4.6	F4IIU4	F4IIU4	689	AIR9	187-kDa microtubule-associated protein AIR9
317848777770996	317832012176514	316955280303955	316626758575439			serine-type carboxypeptidase activity [GO:0004185]	21	0	323.31	462	43.6	43.6	43.6	43.6	F4IKK4	F4IKK4	691	SNG1	Sinapoylglucose 1
247749996185303	248687725067139	247962493896484	243310127258301				6	0	6.709	5	21.5	21.5	21.5	21.5	F4IKL8	F4IKL8	692	At2g29310	NAD(P)-binding Rossmann-fold superfamily protein
308833637237549	306644134521484	307793312072754	307566070556641		cytosol [GO:0005829];peroxisome [GO:0005777]	oxidoreductase activity [GO:0016491]	18	0	323.31	194	57.3	52.8	57.3	52.8	F4IKM1	F4IKM1	693	At2g29340	Tropinone reductase homolog At2g29340
264245586395264	259343166351318	264321784973145	254966773986816	microtubule-based movement [GO:0007018]	kinesin complex [GO:0005871];microtubule [GO:0005874]	ATP binding [GO:0005524];ATPase activity [GO:0016887];microtubule binding [GO:0008017];microtubule motor activity [GO:0003777]	3	0.0066024	1.6434	2	1.6	1.6	2.7	1.6	F4IL57	F4IL57	694	KIN14I	Kinesin-like protein KIN-14I
202720737457275	NaN	215857753753662	211417083740234		cytosol [GO:0005829];mitochondrion [GO:0005739];nucleus [GO:0005634];plasma membrane [GO:0005886]		33	0	277.68	160	2.7	0	1.8	0.8	F4IL68	F4IL68	695	At2g07360	SH3 domain-containing protein
250429763793945	26083812713623	257252559661865	256002559661865	mRNA processing [GO:0006397]	nucleus [GO:0005634]	RNA binding [GO:0003723]	13	0	83.393	63	5.7	5	7.7	5.3	F4ILE0	F4ILE0	697	At2g16940	Splicing factor, CC1-like protein
220683498382568	NaN	221852245330811	NaN	anther wall tapetum development [GO:0048658];cellular response to reactive oxygen species [GO:0034614];chloroplast disassembly [GO:1904821];protein ubiquitination [GO:0016567];root development [GO:0048364]	cytoplasm [GO:0005737]	ubiquitin protein ligase activity [GO:0061630]	14	0	52.761	37	1.3	0	1.3	5.1	F4ILG6	F4ILG6	698	PUB4	RING-type E3 ubiquitin transferase
276880588531494	288684711456299	289878540039063	297858600616455	microtubule-based movement [GO:0007018]		ATP binding [GO:0005524];microtubule binding [GO:0008017];microtubule motor activity [GO:0003777]	7	0	5.0343	41	1.4	2	1.3	2	F4ILV6	F4ILV6	699	At2g36200	P-loop containing nucleoside triphosphate hydrolases superfamily protein
268524570465088	265203590393066	267881813049316	268164100646973	biosynthetic process [GO:0009058]		transferase activity [GO:0016740]	9	0	18.388	83	15.2	18.6	23.8	10.6	F4IM97	F4IM97	700	At2g01220	Nucleotidylyl transferase superfamily protein
NaN	245228290557861	NaN	248954582214355		mitochondrion [GO:0005739]	magnesium ion binding [GO:0000287]	7	0	47.088	8	33.6	34.5	34.5	34.5	F4INE2	F4INE2	703	At2g07732	Ribulose bisphosphate carboxylase large chain, catalytic domain-containing protein
253533306121826	251641139984131	252453231811523	256413288116455			ribonuclease activity [GO:0004540];RNA binding [GO:0003723]	10	0	32.112	47	1.9	1.8	1	1.9	F4INI6	F4INI6	705	EMB2763	Ribonuclease II family protein
297996654510498	298356914520264	29931568145752	300416603088379	post-embryonic root development [GO:0048528]	cytoplasm [GO:0005737];cytosol [GO:0005829];nucleus [GO:0005634];plasma membrane [GO:0005886]	calcium ion binding [GO:0005509]	22	0	279.58	238	52.5	61.6	54	56.2	F4IP55	F4IP55	706	GRF9	General regulatory factor 9
250646800994873	251139430999756	250128650665283	250621700286865	endoplasmic reticulum to Golgi vesicle-mediated transport [GO:0006888];protein exit from endoplasmic reticulum [GO:0032527];protein maturation [GO:0051604];vesicle docking involved in exocytosis [GO:0006904]	cytoplasm [GO:0005737]		5	0	21.874	6	0.9	0.9	2	0.9	F4IP68	F4IP68	707	MAG2-interacting protein 3	Vesicle docking protein
NaN	208439884185791	210359725952148	231470909118652			RNA binding [GO:0003723]	8	0	10.657	46	0	1.6	2.5	2.8	F4IP94	F4IP94	708	ML2	MEI2-like 2
266055488586426	271305541992188	270969772338867	273154449462891	phosphatidylinositol biosynthetic process [GO:0006661];pollen development [GO:0009555];vacuole organization [GO:0007033]	mitochondrion [GO:0005739];PAS complex [GO:0070772];vacuolar membrane [GO:0005774]		18	0	91.864	116	0.9	2	2.6	2	F4IPA6	F4IPA6	709	At2g01690	ARM repeat superfamily protein
300227394104004	299532432556152	300047721862793	299427967071533	cristae formation [GO:0042407];cysteinyl-tRNA aminoacylation [GO:0006423];polar nucleus fusion [GO:0010197];regulation of programmed cell death [GO:0043067]	chloroplast [GO:0009507];chloroplast stroma [GO:0009570];cytoplasm [GO:0005737];cytosol [GO:0005829];mitochondrion [GO:0005739]	ATP binding [GO:0005524];cysteine-tRNA ligase activity [GO:0004817];metal ion binding [GO:0046872]	31	0	188.02	270	42.3	44.6	39.1	43.9	F4IPY2	F4IPY2	712	SYCO	Cysteine--tRNA ligase, chloroplastic/mitochondrial
279484882354736	278394203186035	277229919433594	279855480194092	hydrogen peroxide catabolic process [GO:0042744];response to oxidative stress [GO:0006979]	extracellular region [GO:0005576]	heme binding [GO:0020037];metal ion binding [GO:0046872];peroxidase activity [GO:0004601]	20	0	139.72	133	31.8	30.1	28	33.8	F4IQ05	F4IQ05	713	At2g37130	Peroxidase
274845447540283	2775461769104	278263854980469	28149284362793	miRNA loading onto RISC involved in gene silencing by miRNA [GO:0035280];protein import into nucleus [GO:0006606]	cytoplasm [GO:0005737];cytosol [GO:0005829];nuclear envelope [GO:0005635];nucleus [GO:0005634]	Ran GTPase binding [GO:0008536]	39	0	164.32	261	5.7	9.2	8.3	15.5	F4IRR2	F4IRR2	718	SAD2	Importin beta-like SAD2
NaN	22515905380249	NaN	284884185791016	red or far-red light signaling pathway [GO:0010017]	endoplasmic reticulum [GO:0005783];Golgi apparatus [GO:0005794];plasma membrane [GO:0005886];vacuole [GO:0005773]	heme binding [GO:0020037]	9	0	13.385	28	0	4.9	0	3.7	F4IRX7	F4IRX7	719	SOUL-1	SOUL heme-binding family protein
26203592300415	NaN	259683799743652	NaN	regulation of transcription, DNA-templated [GO:0006355];response to salt stress [GO:0009651];sodium ion homeostasis [GO:0055078]	cytosol [GO:0005829];nucleus [GO:0005634]	calcium ion binding [GO:0005509];nuclear receptor transcription coactivator activity [GO:0030374]	15	0	10.856	31	2.6	1	1.9	1.6	F4IS91	F4IS91	720	RSA1	Protein SHORT ROOT IN SALT MEDIUM 1
257170677185059	256046447753906	255854015350342	253779907226563			ATP binding [GO:0005524];protein kinase activity [GO:0004672]	2	0.0088246	1.5239	3	1.5	1.5	1.5	1.5	F4ISN4	F4ISN4	721	At2g25750	Protein kinase family protein
272383594512939	278107833862305	280454139709473	275713081359863	methylation [GO:0032259]		methyltransferase activity [GO:0008168]	10	0	21.374	47	17.6	13.6	15.1	10.2	F4IST0	F4IST0	722	At2g32160	S-adenosyl-L-methionine-dependent methyltransferases superfamily protein
262581958770752	268861141204834	264239673614502	264636058807373	methylation [GO:0032259]		S-adenosylmethionine-dependent methyltransferase activity [GO:0008757]	9	0	33.734	33	8.1	8.4	8.4	11.4	F4IST2	F4IST2	723	At2g32170	S-adenosyl-L-methionine-dependent methyltransferases superfamily protein
297715759277344	298335056304932	297942676544189	299988689422607	defense response to fungus, incompatible interaction [GO:0009817];response to abscisic acid [GO:0009737];response to cadmium ion [GO:0046686]	endoplasmic reticulum [GO:0005783];membrane [GO:0016020];plasma membrane [GO:0005886]		119	0	323.31	759	32.7	27.5	31.8	30.5	F4ISU2	F4ISU2	724	At2g32240	Early endosome antigen
241805591583252	238918952941895	244362525939941	243643951416016			pyridoxal phosphate binding [GO:0030170];transaminase activity [GO:0008483]	11	0	15.858	27	4.7	4.7	4.9	9.9	F4ISY3	F4ISY3	725	AGT3	Alanine:glyoxylate aminotransferase 3
302199726104736	303032360076904	304348983764648	302256145477295		chloroplast [GO:0009507];chloroplast stroma [GO:0009570];cytosol [GO:0005829]		17	0	289.55	228	41.2	56.1	41.2	47.1	F4IT21	F4IT21	726	At2g43945	Uncharacterized protein
24250825881958	241834392547607	244169311523438	NaN			ubiquitin-like modifier activating enzyme activity [GO:0008641]	6	0	4.333	6	2.4	4.8	4.8	2.4	F4ITQ5	F4ITQ5	728	AXL	AXR1-like protein
268976993560791	269121646881104	266392040252686	269858741760254			ATP binding [GO:0005524];metal ion binding [GO:0046872];phosphoprotein phosphatase activity [GO:0004721];protein kinase activity [GO:0004672]	2	0.0020336	2.1708	3	2.7	1.9	1.9	1.9	F4IUD7	F4IUD7	729	At2g20050	Protein phosphatase 2C and cyclic nucleotide-binding/kinase domain-containing protein
270515480041504	273649444580078	270800952911377	274410266876221				4	0	44.104	40	20.2	16.6	20.2	20.2	F4IUJ0	F4IUJ0	731	At2g26340	Uncharacterized protein
210381851196289	214619884490967	210323448181152	232675666809082	defense response to bacterium [GO:0042742];jasmonic acid mediated signaling pathway [GO:0009867];long-day photoperiodism [GO:0048571];nuclear-transcribed mRNA catabolic process, nonsense-mediated decay [GO:0000184];response to wounding [GO:0009611];salicylic acid mediated signaling pathway [GO:0009863]	cytoplasm [GO:0005737];exon-exon junction complex [GO:0035145];nucleolus [GO:0005730];perinuclear region of cytoplasm [GO:0048471];polysome [GO:0005844]	mRNA binding [GO:0003729]	22	0	45.534	66	2.1	1.7	1.8	1.1	F4IUX6	F4IUX6	732	UPF2	Regulator of nonsense transcripts UPF2
296408252716064	296198883056641	296144752502441	300576286315918				21	0	127.47	168	46.6	36.8	45.4	40	F4IV18	F4IV18	733	At2g44760	Dihydroorotate dehydrogenase (DUF3598)
254187335968018	25534008026123	252178592681885	NaN	amyloplast organization [GO:0009660];cell division [GO:0051301];embryo development ending in seed dormancy [GO:0009793];embryonic axis specification [GO:0000578];endocytosis [GO:0006897];endosome organization [GO:0007032];late endosome to vacuole transport [GO:0045324];negative gravitropism [GO:0009959];phototropism [GO:0009638];protein targeting to vacuole [GO:0006623];receptor-mediated endocyto…	endoplasmic reticulum [GO:0005783];endosome membrane [GO:0010008];Golgi apparatus [GO:0005794];intracellular membrane-bounded organelle [GO:0043231];late endosome [GO:0005770];late endosome membrane [GO:0031902];peroxisome [GO:0005777];trans-Golgi network [GO:0005802];vacuolar membrane [GO:0005774];vacuole [GO:0005773]		12	0	18.097	58	0.5	0.5	0.5	0	F4IVL6	F4IVL6	735	GRV2	DnaJ homolog subfamily C GRV2
223857707977295	226867771148682	226485805511475	231022148132324		commitment complex [GO:0000243];nuclear speck [GO:0016607];U2AF [GO:0089701];U2-type prespliceosome [GO:0071004]	poly-pyrimidine tract binding [GO:0008187];pre-mRNA 3'-splice site binding [GO:0030628]	1	0	3.296	21	1.1	1.1	1.1	1.1	F4IVU7	F4IVU7	736	At2g33435	RNA-binding (RRM/RBD/RNP motifs) family protein
310332813262939	305792961120605	294857349395752	296823253631592	pentose-phosphate shunt [GO:0006098];reductive pentose-phosphate cycle [GO:0019253];response to cadmium ion [GO:0046686]	chloroplast [GO:0009507];chloroplast stroma [GO:0009570];chloroplast thylakoid membrane [GO:0009535];cytosol [GO:0005829];plastid [GO:0009536]	metal ion binding [GO:0046872];transketolase activity [GO:0004802]	63	0	323.31	366	37.9	44.4	39.8	40.8	F4IW47	F4IW47	739	TKL-2	Transketolase-2, chloroplastic
241162452697754	23996452331543	242562351226807	249371929168701	tRNA processing [GO:0008033];tRNA splicing, via endonucleolytic cleavage and ligation [GO:0006388]		NAD+ ADP-ribosyltransferase activity [GO:0003950];tRNA 2'-phosphotransferase activity [GO:0000215]	7	0	26.85	20	8.3	12.8	12.8	8.3	F4IW51	F4IW51	740	emb1067	RNA 2'-phosphotransferase, Tpt1 / KptA family
254637603759766	255557289123535	253492870330811	257703189849854		Golgi apparatus [GO:0005794];integral component of membrane [GO:0016021]	O-acetyltransferase activity [GO:0016413]	4	0	5.6533	24	10.7	9.6	10.7	10.7	F4IWA8	F4IWA8	741	TBL41	Protein trichome birefringence-like 41
25181468963623	249410057067871	255382766723633	243232669830322	ubiquitin-dependent protein catabolic process [GO:0006511]		ATP binding [GO:0005524];ubiquitin-protein transferase activity [GO:0004842]	6	0	9.2548	12	7	13.9	7	6.5	F4IWU7	F4IWU7	742	UBC14	Ubiquitin-conjugating enzyme 14
32836841583252	32852367401123	329184226989746	329626502990723	tricarboxylic acid cycle [GO:0006099]	cytosol [GO:0005829];mitochondrion [GO:0005739];oxoglutarate dehydrogenase complex [GO:0045252]	cobalt ion binding [GO:0050897];oxoglutarate dehydrogenase (succinyl-transferring) activity [GO:0004591];thiamine pyrophosphate binding [GO:0030976];zinc ion binding [GO:0008270]	110	0	323.31	2173	63.5	60.7	62.6	62.8	F4IWV2	F4IWV2	743	At3g55410	2-oxoglutarate dehydrogenase, E1 component
NaN	229622573852539	235647678375244	224314517974854	Golgi to vacuole transport [GO:0006896];intracellular protein transport [GO:0006886];lytic vacuole organization [GO:0080171];regulation of intracellular pH [GO:0051453]	AP-3 adaptor complex [GO:0030123]		12	0	14.616	43	0	2.1	2.9	2.1	F4IWW1	F4IWW1	744	PAT2	AP-3 complex subunit beta
251473636627197	274739818572998	272666912078857	278391799926758				32	0	60.29	109	3.4	2.5	3.4	2.6	F4IX23	F4IX23	745	At3g62010	Metal ion-binding protein
25381856918335	245585918426514	240544891357422	246809959411621	defense response to bacterium [GO:0042742];endocytosis [GO:0006897];immune response [GO:0006955];innate immune response [GO:0045087];protein transport [GO:0015031];regulation of ARF protein signal transduction [GO:0032012];vesicle-mediated transport [GO:0016192];viral process [GO:0016032]	cytosol [GO:0005829];early endosome [GO:0005769];early endosome membrane [GO:0031901];trans-Golgi network [GO:0005802]	ARF guanyl-nucleotide exchange factor activity [GO:0005086]	122	0	323.31	685	7	9	5.6	6.2	F4IXW2	F4IXW2	748	BIG5	Brefeldin A-inhibited guanine nucleotide-exchange protein 5
269880428314209	267873096466064	268869285583496	267804412841797				12	0	150.32	80	28.7	27.6	16.8	26.5	F4IY75	F4IY75	749	At3g56130	Biotin/lipoyl attachment domain-containing protein
298607521057129	299202537536621	299871215820313	298652153015137	histidyl-tRNA aminoacylation [GO:0006427];mitochondrial translation [GO:0032543]	cytoplasm [GO:0005737];cytosol [GO:0005829];mitochondrion [GO:0005739]	ATP binding [GO:0005524];histidine-tRNA ligase activity [GO:0004821]	73	0	323.31	540	39.5	38.7	35	33.6	F4IYF8	F4IYF8	750	At3g02760	Histidine--tRNA ligase, cytoplasmic
258903408050537	256929340362549	260045318603516	257411880493164		chloroplast [GO:0009507]	ATP binding [GO:0005524];D-alanine-D-alanine ligase activity [GO:0008716];metal ion binding [GO:0046872]	7	0	3.7216	12	3.1	3.1	4.2	4.2	F4IYI8	F4IYI8	751	At3g08840	D-alanine-D-alanine ligase family
290496006011963	288389701843262	290525321960449	291812267303467	protein import into nucleus [GO:0006606]	cytoplasm [GO:0005737];cytosol [GO:0005829];nucleus [GO:0005634]	nuclear import signal receptor activity [GO:0061608];nuclear localization sequence binding [GO:0008139];Ran GTPase binding [GO:0008536]	41	0	323.31	311	23.3	19.7	24.2	24.8	F4IYK3	F4IYK3	752	At3g08943	ARM repeat superfamily protein
274214973449707	270053882598877	274343605041504	NaN	protein import into nucleus [GO:0006606]	cytosol [GO:0005829];nuclear envelope [GO:0005635]	Ran GTPase binding [GO:0008536]	13	0	70.244	50	1.2	1.2	2	0	F4IYK6	F4IYK6	753	At3g08960	ARM repeat superfamily protein
24938045501709	252630939483643	272166004180908	270889148712158	7-methylguanosine mRNA capping [GO:0006370];DNA recombination [GO:0006310];DNA repair [GO:0006281]	host cell nucleus [GO:0042025];plasmodesma [GO:0009506]	ATP binding [GO:0005524];DNA ligase (ATP) activity [GO:0003910];GTP binding [GO:0005525];mRNA guanylyltransferase activity [GO:0004484];polynucleotide 5'-phosphatase activity [GO:0004651];protein tyrosine phosphatase activity [GO:0004725];protein tyrosine/serine/threonine phosphatase activity [GO:0008138]	6	0.0011253	2.4081	22	5.5	4.3	1.6	1.6	F4IYM6	F4IYM6	754	At3g09100	mRNA capping enzyme family protein
278562622070313	277156791687012	277411766052246	280077419281006				22	0	48.169	144	17.8	17.8	15.3	15.3	F4IYR7;Q9SRD0	F4IYR7	755	At3g15410	Leucine-rich repeat (LRR) family protein
245500431060791	246973152160645	245046405792236	261409435272217				5	0	7.9091	27	8.1	3	7.6	7.6	F4IZI7	F4IZI7	757	AtATG18a	Transducin/WD40 repeat-like superfamily protein
216679134368896	207250061035156	203358173370361	200706443786621	double fertilization forming a zygote and endosperm [GO:0009567];mRNA splice site selection [GO:0006376]	cytosol [GO:0005829];U1 snRNP [GO:0005685]	mRNA binding [GO:0003729]	16	0	31.466	57	6.2	4.2	4.2	4.2	F4IZU3	F4IZU3	759	UNE6	LUC7 related protein
265091934204102	266839160919189	265770111083984	265824775695801		chloroplast [GO:0009507]		6	0	72.807	21	17.1	16.7	16.7	14.2	F4IZV9	F4IZV9	760	At3g09250	Nuclear transport factor 2 (NTF2) family protein
236656818389893	239596080780029	244911823272705	241223411560059	cell cycle [GO:0007049];cell division [GO:0051301];cytoplasmic mRNA processing body assembly [GO:0033962];deadenylation-dependent decapping of nuclear-transcribed mRNA [GO:0000290];mRNA processing [GO:0006397];stem cell population maintenance [GO:0019827]	endoplasmic reticulum [GO:0005783];nucleus [GO:0005634];P-body [GO:0000932]	RNA binding [GO:0003723]	5	0	4.1249	20	1.2	1.2	1.2	2.6	F4J077	F4J077	761	PAT1H1	Protein PAT1 homolog 1
NaN	2380784034729	209786186218262	21755033493042	autophagosome assembly [GO:0000045];pollen development [GO:0009555]	autophagosome membrane [GO:0000421];cytosol [GO:0005829];integral component of membrane [GO:0016021];plasma membrane [GO:0005886]		52	0	310.16	225	0	0.9	0.6	0.9	F4J0P2	F4J0P2	763	At3g50590	Transducin/WD40 repeat-like superfamily protein
302110633850098	302715301513672	302327213287354	302391109466553	starch catabolic process [GO:0005983]	chloroplast [GO:0009507];chloroplast starch grain [GO:0009569];chloroplast stroma [GO:0009570];starch grain [GO:0043036]	carbohydrate phosphatase activity [GO:0019203];protein tyrosine/serine/threonine phosphatase activity [GO:0008138]	25	0	102.74	199	26.1	29.6	27.7	23	F4J117	F4J117	765	LSF1	Phosphoglucan phosphatase LSF1, chloroplastic
250998096466064	259752635955811	257399787902832	258767318725586	transcription, DNA-templated [GO:0006351]	cytosol [GO:0005829];nucleus [GO:0005634]	transcription corepressor activity [GO:0003714]	11	0	12.1	55	6.8	6.8	3.6	5.8	F4J153	F4J153	767	At3g03570	Signal transducer, putative (DUF3550/UPF0682)
317437057495117	311455230712891	308274459838867	309036140441895	cell division [GO:0051301];chloroplast fission [GO:0010020];regulation of division septum assembly [GO:0032955]	chloroplast inner membrane [GO:0009706]		27	0	323.31	356	56.6	60.4	58.8	54	F4J1U2	F4J1U2	768	At3g29185	Glutamate NMDA receptor subunit epsilon-1, putative (DUF3598)
312904949188232	312664012908936	321605377197266	320918197631836	carbohydrate metabolic process [GO:0005975];response to bacterium [GO:0009617]	anchored component of plasma membrane [GO:0046658];apoplast [GO:0048046];cell wall [GO:0005618];endoplasmic reticulum [GO:0005783];secretory vesicle [GO:0099503]	cellulase activity [GO:0008810];glucan endo-1,3-beta-D-glucosidase activity [GO:0042973]	20	0	323.31	259	73	73	73	63.3	F4J270	F4J270	769	BG3	Probable glucan endo-1,3-beta-glucosidase BG3
264403781890869	265771541595459	264953670501709	262913188934326	folic acid-containing compound biosynthetic process [GO:0009396];one-carbon metabolic process [GO:0006730];photorespiration [GO:0009853];seedling development [GO:0090351];tetrahydrofolylpolyglutamate biosynthetic process [GO:0046901]	cytoplasm [GO:0005737];cytosol [GO:0005829];mitochondrial inner membrane [GO:0005743];mitochondrial matrix [GO:0005759];mitochondrion [GO:0005739]	ATP binding [GO:0005524];metal ion binding [GO:0046872];tetrahydrofolylpolyglutamate synthase activity [GO:0004326]	6	0	8.9907	36	7	7.7	5.4	7.5	F4J2K2	F4J2K2	770	FPGS2	Folylpolyglutamate synthase
277029914855957	276365089416504	276515731811523	276100635528564	mature ribosome assembly [GO:0042256]	cytosol [GO:0005829];ribonucleoprotein complex [GO:1990904];ribosome [GO:0005840]	GTP binding [GO:0005525];GTPase activity [GO:0003924];ribosome binding [GO:0043022];translation elongation factor activity [GO:0003746]	26	0	87.747	167	16.3	12.2	14.1	16.2	F4J2T9	F4J2T9	771	At3g22980	Ribosomal protein S5/Elongation factor G/III/V family protein
225815296173096	229375801086426	244314136505127	248166542053223	nucleotide metabolic process [GO:0009117]		guanylate kinase activity [GO:0004385]	8	0	21.727	36	4.9	4.9	2.1	2.1	F4J3E9	F4J3E9	775	AGK2	Guanylate kinase
283421039581299	283548107147217	285086193084717	282138690948486	carbohydrate metabolic process [GO:0005975]	vacuolar membrane [GO:0005774]	lyase activity [GO:0016829];polygalacturonase activity [GO:0004650]	10	0	60.305	133	20.2	20.2	12.2	15.9	F4J3I0	F4J3I0	776	At3g57790	Pectin lyase-like superfamily protein
290068874359131	291222820281982	289901828765869	287232208251953	peptidyl-diphthamide biosynthetic process from peptidyl-histidine [GO:0017183]		diphthine-ammonia ligase activity [GO:0017178]	21	0	131.6	170	18.8	21.2	19.1	17.8	F4J3Q1	F4J3Q1	778	At3g04480	Endoribonuclease
263952732086182	259968814849854	266325626373291	268485221862793			serine-type carboxypeptidase activity [GO:0004185]	8	0	17.296	20	21.1	12.7	19.3	14.5	F4J3S3	F4J3S3	779	SCPL7	Serine carboxypeptidase-like 7
29703800201416	294873275756836	295872955322266	296087589263916	tryptophanyl-tRNA aminoacylation [GO:0006436]		ATP binding [GO:0005524];transferase activity [GO:0016740];tryptophan-tRNA ligase activity [GO:0004830]	23	0	65.668	128	31.1	26.9	34.1	29.1	F4J4T3	F4J4T3	783	At3g04600	Nucleotidylyl transferase superfamily protein
247882061004639	247260875701904	247722835540771	24777961730957	intracellular protein transport [GO:0006886]		Ran GTPase binding [GO:0008536]	12	0	15.052	30	2	1.4	1.9	2	F4J550	F4J550	784	At3g17340	ARM repeat superfamily protein
NaN	244212398529053	NaN	244806823730469			kinase activity [GO:0016301];polysaccharide binding [GO:0030247]	1	0	27.733	6	0	7.3	0	7.3	F4J551	F4J551	785	At3g17350	Wall-associated receptor kinase carboxy-terminal protein
NaN	25343334197998	252547588348389	227690677642822			metal ion binding [GO:0046872];RNA binding [GO:0003723]	5	0	5.5136	16	0	0.8	1.9	2.8	F4J5A7	F4J5A7	786	At3g23900	RNA recognition motif (RRM)-containing protein
213110790252686	NaN	211983242034912	251575756072998	regulation of phosphoprotein phosphatase activity [GO:0043666]		protein phosphatase binding [GO:0019903];protein phosphatase regulator activity [GO:0019888]	30	0	248.97	150	2.8	0	2.5	3	F4J5I0	F4J5I0	787	At3g45190	SIT4 phosphatase-associated family protein
NaN	252934074401855	252515468597412	NaN	clathrin coat assembly [GO:0048268];clathrin-dependent endocytosis [GO:0072583];intracellular protein transport [GO:0006886]	clathrin coat of coated pit [GO:0030132];clathrin coat of trans-Golgi network vesicle [GO:0030130];clathrin vesicle coat [GO:0030125];cytosol [GO:0005829];plasma membrane [GO:0005886]	clathrin heavy chain binding [GO:0032050];structural molecule activity [GO:0005198]	6	0	36.01	19	0	3.1	3.1	0	F4J5M9	F4J5M9	788	At3g51890	Clathrin light chain 3
24233814239502	237785625457764	234615135192871	243000583648682	DNA-dependent DNA replication [GO:0006261]		DNA binding [GO:0003677];DNA-directed DNA polymerase activity [GO:0003887];exonuclease activity [GO:0004527]	3	0	4.185	8	3.6	3.6	6.3	3.6	F4J5Q3	F4J5Q3	789	At3g52050	5'-3' exonuclease family protein
29820463180542	297976264953613	299044055938721	300450496673584	intracellular distribution of mitochondria [GO:0048312];positive regulation of mitochondrial fusion [GO:0010636]	cytosol [GO:0005829];plasma membrane [GO:0005886]	RNA binding [GO:0003723]	79	0	323.31	717	31	28.2	33.3	24.5	F4J5R9	F4J5R9	790	NOXY38	Clustered mitochondria protein homolog
285226421356201	283841800689697	286124897003174	284449405670166		cytosol [GO:0005829];mitochondrion [GO:0005739]	ATP binding [GO:0005524];transferase activity, transferring acyl groups [GO:0016746]	45	0	323.31	439	25.4	25.2	29.2	22.6	F4J5T2	F4J5T2	791	LTA3	Dihydrolipoamide acetyltransferase component of pyruvate dehydrogenase complex
280681495666504	276488342285156	278683834075928	277066192626953	formation of cytoplasmic translation initiation complex [GO:0001732]	cytosol [GO:0005829];eukaryotic 43S preinitiation complex [GO:0016282];eukaryotic 48S preinitiation complex [GO:0033290];eukaryotic translation initiation factor 3 complex [GO:0005852];plasma membrane [GO:0005886]	mRNA binding [GO:0003729];translation initiation factor activity [GO:0003743]	23	0	198.61	185	28.3	26.5	18.4	24.9	F4J6A1	F4J6A1	792	EIF3G1	Eukaryotic translation initiation factor 3 subunit G
293309326171875	294650936126709	29227933883667	292648582458496	chromatin silencing [GO:0006342];embryo development ending in seed dormancy [GO:0009793];leaf development [GO:0048366];regulation of flower development [GO:0009909];shoot apical meristem development [GO:1902182]	cytosol [GO:0005829]	DNA binding [GO:0003677]	35	0	76.659	285	34.3	33.4	36.6	29.7	F4J6A8	F4J6A8	793	At3g11450	DnaJ and Myb-like DNA-binding domain-containing protein
246220970153809	NaN	24575366973877	275946292877197	intracellular signal transduction [GO:0035556];peptidyl-serine phosphorylation [GO:0018105];protein autophosphorylation [GO:0046777];regulation of growth [GO:0040008]	cytosol [GO:0005829];plasma membrane [GO:0005886];root hair [GO:0035618]	ATP binding [GO:0005524];kinase activity [GO:0016301];metal ion binding [GO:0046872];protein serine/threonine kinase activity [GO:0004674]	15	0	21.801	40	2	0	2	1.1	F4J6F6	F4J6F6	794	IREH1	Probable serine/threonine protein kinase IREH1
243908042907715	232560920715332	23423807144165	242078418731689	ubiquinone biosynthetic process [GO:0006744]	extrinsic component of mitochondrial inner membrane [GO:0031314];mitochondrion [GO:0005739]	FAD binding [GO:0071949];oxidoreductase activity [GO:0016491];oxidoreductase activity, acting on paired donors, with incorporation or reduction of molecular oxygen, NAD(P)H as one donor, and incorporation of one atom of oxygen [GO:0016709];oxidoreductase activity, acting on paired donors, with incorporation or reduction of molecular oxygen, reduced flavin or flavoprotein as one donor, and incorpo…	9	0	34.26	31	5.1	2.6	2.6	5.5	F4J6I6	F4J6I6	795	COQ6	Ubiquinone biosynthesis monooxygenase COQ6, mitochondrial
280115871429443	271122741699219	283318939208984	278713245391846	protein import into nucleus [GO:0006606]	cytosol [GO:0005829];nuclear envelope [GO:0005635]	Ran GTPase binding [GO:0008536]	44	0	323.31	315	12.2	15	17.7	10.7	F4J738;REV__Q9M0M4	F4J738	796	At3g59020	Importin beta-like SAD2 homolog
274106216430664	273456192016602	274707279205322	275110359191895	actin cytoskeleton organization [GO:0030036];actin filament capping [GO:0051693];actin filament organization [GO:0007015];barbed-end actin filament capping [GO:0051016]	F-actin capping protein complex [GO:0008290];nucleus [GO:0005634]	actin filament binding [GO:0051015]	6	0	9.6136	44	7.1	18.1	18.1	14.4	F4J7C4	F4J7C4	797	CPA	Subunits of heterodimeric actin filament capping protein Capz superfamily
276340179443359	272706165313721	278047657012939	280299167633057	protein deubiquitination [GO:0016579];ubiquitin-dependent protein catabolic process [GO:0006511]		thiol-dependent ubiquitinyl hydrolase activity [GO:0036459]	99	0	253.81	310	36.2	39	36.3	37	F4J7I2	F4J7I2	798	UBP13	Ubiquitin-specific protease 13
241741714477539	24640417098999	NaN	234365711212158	endocytosis [GO:0006897];pollen development [GO:0009555]	cell plate [GO:0009504];cytoplasm [GO:0005737];cytoskeleton [GO:0005856];cytosol [GO:0005829];nucleus [GO:0005634];phragmoplast [GO:0009524];plasma membrane [GO:0005886];plasmodesma [GO:0009506]	identical protein binding [GO:0042802]	52	0	323.31	245	3.7	2.6	0	1.9	F4J8D3	F4J8D3	800	TPLATE	Protein TPLATE
26706750869751	268233528137207	27214750289917	275952682495117	embryo development ending in seed dormancy [GO:0009793];mRNA methylation [GO:0080009];mRNA processing [GO:0006397];RNA splicing [GO:0008380]	nuclear speck [GO:0016607];nucleoplasm [GO:0005654]		10	0	51.353	24	0.4	0.4	0.4	0.4	F4J8G7	F4J8G7	801	VIR	Protein virilizer homolog
27081823348999	269976577758789	270716304779053	269149036407471			hydrolase activity [GO:0016787]	8	0	71.901	64	29.6	30.2	19.1	24.6	F4J8J7	F4J8J7	802	At3g11930	Adenine nucleotide alpha hydrolases-like superfamily protein
274058418273926	27556547164917	272211265563965	270365333557129	embryo sac development [GO:0009553];mRNA processing [GO:0006397];rRNA processing [GO:0006364]	nucleolus [GO:0005730];plasma membrane [GO:0005886];small-subunit processome [GO:0032040]	RNA binding [GO:0003723]	21	0	52.757	63	1.4	1.4	1.4	1.4	F4J8K6	F4J8K6	803	RRP5	rRNA biogenesis protein RRP5
278305625915527	275537662506104	278272342681885	277148933410645	intracellular signal transduction [GO:0035556];protein phosphorylation [GO:0006468];regulation of gene expression [GO:0010468];regulation of mRNA processing [GO:0050684];response to oxidative stress [GO:0006979];spliceosomal complex assembly [GO:0000245]	cytoplasm [GO:0005737];nucleus [GO:0005634]	ATP binding [GO:0005524];MAP kinase activity [GO:0004707];protein kinase activity [GO:0004672]	4	0	4.6183	21	1.7	3.8	1.7	3.8	F4J982	F4J982	806	SRPK4	Ser/arg-rich protein kinase 4
295775146484375	296462268829346	295573329925537	295606517791748	glutamine biosynthetic process [GO:0006542];lateral root formation [GO:0010311];polyamine catabolic process [GO:0006598];response to abscisic acid [GO:0009737];response to bacterium [GO:0009617];root cap development [GO:0048829]	cytosol [GO:0005829]	gamma-tubulin binding [GO:0043015];hydrolase activity [GO:0016787];protein self-association [GO:0043621];transcription factor binding [GO:0008134]	53	0	323.31	434	28.2	27.8	30.9	34.5	F4J9A0	F4J9A0	807	NodGS	Nodulin/glutamine synthase-like protein
237957057952881	246350574493408	251561107635498	236175079345703		cytosol [GO:0005829]		51	0	257.23	195	6.1	5.9	2.4	4.5	F4J9K9	F4J9K9	809	At3g05900	Neurofilament protein-like protein
270023880004883	270810108184814	271347694396973	277593250274658			metal ion binding [GO:0046872];oxidoreductase activity [GO:0016491]	12	0	24.859	52	41.4	34.2	49.6	39.6	F4J9Y8	F4J9Y8	811	At3g19000	2-oxoglutarate (2OG) and Fe(II)-dependent oxygenase superfamily protein
243125743865967	246959896087646	251402034759521	248075942993164			aspartic-type endopeptidase activity [GO:0004190]	2	0	5.9005	4	6.6	6.6	6.6	4.6	F4JA44	F4JA44	812	At3g25700	Eukaryotic aspartyl protease family protein
264417877197266	260361576080322	264019107818604	26532075881958	carbohydrate metabolic process [GO:0005975]		hydrolase activity, hydrolyzing O-glycosyl compounds [GO:0004553]	16	0	13.528	32	23	21.1	23	22.9	F4JAB3	F4JAB3	814	At3g47010	Glycosyl hydrolase family protein
270819244384766	26631175994873	271253395080566	263981475830078				8	0	16.5	24	7	3	7	5.4	F4JAE0	F4JAE0	815	At3g53390	Transducin/WD40 repeat-like superfamily protein
23898645401001	NaN	241416454315186	238346061706543	peptidyl-proline hydroxylation to 4-hydroxy-L-proline [GO:0018401];root hair cell development [GO:0080147]	endoplasmic reticulum [GO:0005783];endoplasmic reticulum membrane [GO:0005789];endosome [GO:0005768];Golgi apparatus [GO:0005794];Golgi cis cisterna [GO:0000137];Golgi membrane [GO:0000139];integral component of membrane [GO:0016021];trans-Golgi network [GO:0005802]	iron ion binding [GO:0005506];L-ascorbic acid binding [GO:0031418];procollagen-proline 4-dioxygenase activity [GO:0004656]	6	0	11.465	11	9.4	0	9.4	5.7	F4JAU3	F4JAU3	816	P4H2	Prolyl 4-hydroxylase 2
NaN	287378597259521	275431098937988	273781547546387	translational elongation [GO:0006414]	cytosol [GO:0005829];ribonucleoprotein complex [GO:1990904];ribosome [GO:0005840]	GTP binding [GO:0005525];GTPase activity [GO:0003924];ribosome binding [GO:0043022];translation elongation factor activity [GO:0003746]	45	0	28.492	18	38	39	40.5	37.9	F4JB05	F4JB05	817	MGH6.2	Ribosomal protein S5/Elongation factor G/III/V family protein
254199542999268	24743501663208	249013633728027	2545290184021	signal transduction [GO:0007165]	cytosol [GO:0005829];nucleus [GO:0005634];protein phosphatase type 2A complex [GO:0000159]	protein phosphatase regulator activity [GO:0019888]	9	0	6.4985	19	3.2	7.6	4.7	5.7	F4JBC4	F4JBC4	818	At3g26020	Serine/threonine protein phosphatase 2A regulatory subunit
297309150695801	296380825042725	297996654510498	296172103881836		chloroplast [GO:0009507]		12	0	134.06	179	47.4	41.6	47.4	38.8	F4JBU0	F4JBU0	820	At3g60440	Phosphoglycerate mutase family protein
249181156158447	249532260894775	255552310943604	255545272827148			3-hydroxyisobutyryl-CoA hydrolase activity [GO:0003860];peptidase activity [GO:0008233]	6	0	13.29	18	4	2.6	9.2	9.4	F4JBV0	F4JBV0	821	At3g60510	ATP-dependent caseinolytic (Clp) protease/crotonase family protein
241851806640625	266318702697754	226064586639404	226153774261475	DNA repair [GO:0006281];proteasomal ubiquitin-independent protein catabolic process [GO:0010499]	cytosol [GO:0005829];nucleus [GO:0005634];proteasome complex [GO:0000502]	lysine-acetylated histone binding [GO:0070577];peptidase activator activity [GO:0016504];proteasome binding [GO:0070628]	59	0	199.89	263	2.1	0.6	2	1.4	F4JC97	F4JC97	822	PA200	Proteasome activator subunit 4
274995250701904	275919933319092	278475074768066	23778263092041			ATP binding [GO:0005524];hydrolase activity [GO:0016787]	29	0	67.805	86	1.5	1.5	1.5	2.8	F4JCC9	F4JCC9	823	At3g19740	P-loop containing nucleoside triphosphate hydrolases superfamily protein
285953407287598	282997264862061	283905086517334	285356407165527	arabinogalactan protein metabolic process [GO:0010405];carbohydrate metabolic process [GO:0005975]	cell wall [GO:0005618]	hydrolase activity, hydrolyzing O-glycosyl compounds [GO:0004553];polysaccharide binding [GO:0030247];raffinose alpha-galactosidase activity [GO:0052692]	12	0	20.702	98	14.5	12.4	14.5	12.2	F4JCI4	F4JCI4	825	At3g26380	Alpha-galactosidase
225639991760254	23650203704834	NaN	NaN				18	0	43.523	64	1.6	0.9	0.7	0	F4JCM5	F4JCM5	826	At3g33530	Transducin family protein / WD-40 repeat family protein
NaN	236435031890869	244920387268066	249815044403076	protein deubiquitination [GO:0016579]		thiol-dependent ubiquitinyl hydrolase activity [GO:0036459]	5	0	5.2661	9	0	0.7	0.7	0.5	F4JCR2	F4JCR2	828	At3g47910	Ubiquitin carboxyl-terminal hydrolase-related protein
24850622177124	NaN	258624477386475	26199291229248	isopentenyl diphosphate biosynthetic process, mevalonate pathway [GO:0019287];sterol biosynthetic process [GO:0016126]	cytosol [GO:0005829];peroxisome [GO:0005777]	ATP binding [GO:0005524];diphosphomevalonate decarboxylase activity [GO:0004163]	23	0	38.264	52	19.3	13.1	22.7	27.9	F4JCU3	F4JCU3	830	MVD2	Diphosphomevalonate decarboxylase MVD2, peroxisomal
294518527984619	296158618927002	NaN	295970115661621			phosphatidylinositol binding [GO:0035091]	1	0.0023981	2.1376	7	1.3	1.3	0	1.3	F4JDV4	F4JDV4	832	At3g48195	Phox (PX) domain-containing protein
26141529083252	260538883209229	260163764953613	264366817474365		secretory vesicle [GO:0099503];vacuole [GO:0005773]		5	0	6.5578	26	15.5	15.5	8.9	8.9	F4JEG0	F4JEG0	835	At3g07460	Uncharacterized protein
289452266693115	290487442016602	289796466827393	290480937957764			hydrolase activity [GO:0016787]	16	0	196.04	158	45.9	55.9	64.2	58.8	F4JEJ3	F4JEJ3	836	At3g13800	Metallo-hydrolase/oxidoreductase superfamily protein
317117385864258	316464157104492	318359394073486	317222023010254			ATP binding [GO:0005524];helicase activity [GO:0004386];translation initiation factor activity [GO:0003743]	52	0	323.31	1226	63.9	69.3	62.4	63.1	F4JEL5	F4JEL5	837	EIF4A1	Eukaryotic translation initiation factor 4A1
255953121185303	258475189208984	258960590362549	264002494812012				10	0	39.892	51	7.3	7.3	14.3	7.3	F4JET6	F4JET6	838	JMJD5	2-oxoglutarate (2OG) and Fe(II)-dependent oxygenase superfamily protein
217705211639404	NaN	NaN	232965602874756	activation of GTPase activity [GO:0090630];intracellular protein transport [GO:0006886]	cytosol [GO:0005829]	GTPase activator activity [GO:0005096];Rab GTPase binding [GO:0017137]	18	0	48.433	52	1.5	0	0	1.7	F4JF82	F4JF82	840	At3g55020	Ypt/Rab-GAP domain of gyp1p superfamily protein
247260875701904	238916168212891	246286754608154	24814847946167			oxidoreductase activity [GO:0016491]	3	0.00094697	2.5849	2	5	9	9	9	F4JFB9	F4JFB9	842	SDRd	NAD(P)-binding Rossmann-fold superfamily protein
273938655853271	2762380027771	279612426757813	274044628143311	protein folding [GO:0006457]	cell wall [GO:0005618];chloroplast stroma [GO:0009570];cytosol [GO:0005829];mitochondrion [GO:0005739]	ATP binding [GO:0005524];unfolded protein binding [GO:0051082]	76	0	323.31	437	24.7	24.7	22.4	21.2	F4JFN3	F4JFN3	845	HSP90-6	Heat shock protein 90-6, mitochondrial
260464153289795	26183723449707	262589511871338	269066715240479	regulation of RNA metabolic process [GO:0051252]	nucleus [GO:0005634];ribonucleoprotein complex [GO:1990904]	mRNA binding [GO:0003729];RNA binding [GO:0003723]	7	0	20.697	17	1.6	1.6	4.6	1.6	F4JFN7	F4JFN7	846	At3g07810	RNA-binding (RRM/RBD/RNP motifs) family protein
238722057342529	247299308776855	243054943084717	243442821502686	xylan catabolic process [GO:0045493]		endo-1,4-beta-xylanase activity [GO:0031176]	5	0	3.2637	27	1.2	1.2	1.2	1.2	F4JG10	F4JG10	849	XYN3	Endo-1,4-beta-xylanase 3
240081272125244	24845703125	246397552490234	245455722808838		integral component of membrane [GO:0016021]	ATP binding [GO:0005524];protein kinase activity [GO:0004672]	4	0	9.1341	16	4.4	1.6	4.4	4.4	F4JGE0	F4JGE0	851	CRK40	Cysteine-rich RLK (RECEPTOR-like protein kinase) 40
281755046844482	282901763916016	282362174987793	282361717224121	embryo development ending in seed dormancy [GO:0009793];fructose 6-phosphate metabolic process [GO:0006002];photosynthesis [GO:0015979];response to glucose [GO:0009749]	cytosol [GO:0005829]	6-phosphofructokinase activity [GO:0003872];ATP binding [GO:0005524];diphosphate-fructose-6-phosphate 1-phosphotransferase activity [GO:0047334];metal ion binding [GO:0046872];phosphofructokinase activity [GO:0008443]	30	0	46.116	92	28.1	27.2	33.9	35.9	F4JGR5	F4JGR5	853	PFP-BETA2	Pyrophosphate--fructose 6-phosphate 1-phosphotransferase subunit beta 2
260134830474854	262857036590576	26123664855957	25961706161499	acyl-CoA metabolic process [GO:0006637];fatty acid catabolic process [GO:0009062]		acyl-CoA hydrolase activity [GO:0047617]	6	0	11.131	53	13.2	13.2	12.5	12.5	F4JHC9	F4JHC9	855	At4g00520	Acyl-CoA thioesterase family protein
246364402770996	245358180999756	24949312210083	246909370422363				4	0	4.121	18	7.9	7.9	4.8	7.9	F4JHD7	F4JHD7	856	At4g00560	NAD(P)-binding Rossmann-fold superfamily protein
311335697174072	311677017211914	312216453552246	313828315734863				28	0	323.31	509	55.4	54.6	54.6	48.8	F4JHJ0	F4JHJ0	859	At4g02450	HSP20-like chaperones superfamily protein
278611812591553	280031909942627	277548713684082	277125339508057	biosynthetic process [GO:0009058]	cytosol [GO:0005829]	catalytic activity [GO:0003824]	12	0	48.673	103	23	20.1	16	16	F4JHW1	F4JHW1	861	At4g02860	Phenazine biosynthesis PhzC/PhzF protein
305486679077148	306580429077148	306309680938721	307297973632813		chloroplast [GO:0009507]	catalytic activity [GO:0003824]	40	0	287.22	360	42.5	44.9	40.5	41.8	F4JI63	F4JI63	864	At4g03200	Catalytics
260596561431885	256346969604492	261110992431641	260908546447754	DNA catabolic process [GO:0006308];RNA phosphodiester bond hydrolysis, endonucleolytic [GO:0090502]		endonuclease activity [GO:0004519];endoribonuclease activity [GO:0004521];metal ion binding [GO:0046872];nucleic acid binding [GO:0003676];single-stranded DNA endodeoxyribonuclease activity [GO:0000014]	5	0	4.6509	19	17.7	7	20.1	17.7	F4JJL0	F4JJL0	869	ENDO4	Endonuclease 4
250504684448242	258680419921875	261560726165771	263092136383057	DNA catabolic process [GO:0006308];RNA phosphodiester bond hydrolysis, endonucleolytic [GO:0090502]		endonuclease activity [GO:0004519];endoribonuclease activity [GO:0004521];metal ion binding [GO:0046872];nucleic acid binding [GO:0003676];single-stranded DNA endodeoxyribonuclease activity [GO:0000014];T/G mismatch-specific endonuclease activity [GO:0043765]	12	0	52.349	49	8.8	8.8	11.1	8.8	F4JJL3	F4JJL3	870	ENDO5	Endonuclease 5
242911605834961	245365295410156	246655731201172	246471881866455				4	0	7.1951	15	30.6	22.4	22.4	30.6	F4JJL6	F4JJL6	871	At4g21620	Glycine-rich protein
274073829650879	274144172668457	275664520263672	276347808837891	intracellular protein transport [GO:0006886]			17	0	133.83	94	24	26.5	17.1	19.6	F4JJR0	F4JJR0	873	VPS26B	Vacuolar protein sorting 26B
298561592102051	298059349060059	298063049316406	29903829574585	tRNA aminoacylation for protein translation [GO:0006418]	chloroplast [GO:0009507];cytosol [GO:0005829];mitochondrion [GO:0005739]	aspartate-tRNA ligase activity [GO:0004815];ATP binding [GO:0005524];DNA binding [GO:0003677];metal ion binding [GO:0046872]	28	0	84.518	248	35.4	36.3	37.8	39.5	F4JJT9	F4JJT9	874	At4g33760	Aspartate--tRNA ligase, chloroplastic/mitochondrial
268556690216064	272481670379639	273871421813965	26696704864502		chloroplast [GO:0009507];chloroplast stroma [GO:0009570]		11	0	24.381	51	22.3	26.7	21.5	16.9	F4JJY7	F4JJY7	875	At4g34090	Cyclin delta-3
269852237701416	265559482574463	269436893463135	265771541595459		cytosol [GO:0005829]	2,3-bisphosphoglycerate-independent phosphoglycerate mutase activity [GO:0046537];metal ion binding [GO:0046872]	18	0	102.27	144	20.9	19.7	18.7	16.3	F4JK17	F4JK17	876	At4g09520	Cofactor-independent phosphoglycerate mutase
228106079101563	NaN	230766582489014	226617736816406	mRNA processing [GO:0006397];snoRNA processing [GO:0043144];tRNA 5'-leader removal [GO:0001682]	nucleus [GO:0005634]	metal ion binding [GO:0046872];ribonuclease P activity [GO:0004526]	6	0	48.032	23	2.1	0	2.1	2.1	F4JKB6	F4JKB6	877	PRORP3	Proteinaceous RNase P 3
316387977600098	311823406219482	311215782165527	317238292694092	cell cycle [GO:0007049];multicellular organism development [GO:0007275];response to abscisic acid [GO:0009737]	cytoplasm [GO:0005737];plasma membrane [GO:0005886]		85	0	323.31	559	35.3	33.2	34.4	34.1	F4JKH6	F4JKH6	879	TSS	Protein TSS
307701416015625	307773723602295	308401870727539	307323875427246		chloroplast [GO:0009507];chloroplast stroma [GO:0009570];cytosol [GO:0005829]		21	0	209.43	234	54.7	54.7	54.7	54.3	F4JKZ9	F4JKZ9	880	At4g16060	Uncharacterized protein
298990821838379	299182643890381	299335403442383	299898300170898	NLS-bearing protein import into nucleus [GO:0006607]	cytosol [GO:0005829];host cell nucleus [GO:0042025];nuclear envelope [GO:0005635];nucleolus [GO:0005730];nucleus [GO:0005634];plasmodesma [GO:0009506]	nuclear import signal receptor activity [GO:0061608];nuclear localization sequence binding [GO:0008139]	41	0	323.31	428	58.7	50.8	61.9	52.5	F4JL11	F4JL11	881	IMPA2	Importin subunit alpha-2
252977867126465	254523372650146	257784385681152	258987598419189	chromatin organization [GO:0006325];flower development [GO:0009908];negative regulation of histone acetylation [GO:0035067];negative regulation of long-day photoperiodism, flowering [GO:0048579];post-embryonic development [GO:0009791];regulation of photoperiodism, flowering [GO:2000028];regulation of transcription, DNA-templated [GO:0006355];seed germination [GO:0009845]	nucleus [GO:0005634]	chromatin binding [GO:0003682];metal ion binding [GO:0046872];methylated histone binding [GO:0035064];transcription regulatory region sequence-specific DNA binding [GO:0000976]	3	0	5.59	17	9	5.1	9	9	F4JL28	F4JL28	882	EBS	Chromatin remodeling protein EBS
245540885925293	246603050231934	247847652435303	249316139221191				6	0	5.7697	42	5.5	3	3	5.5	F4JL78	F4JL78	883	At4g28300	Formin-like protein (DUF1421)
314068965911865	314411449432373	313385181427002	315576419830322	isoleucyl-tRNA aminoacylation [GO:0006428];response to cadmium ion [GO:0046686]	cytosol [GO:0005829]	aminoacyl-tRNA editing activity [GO:0002161];ATP binding [GO:0005524];isoleucine-tRNA ligase activity [GO:0004822];tRNA binding [GO:0000049]	109	0	323.31	1054	48.8	47.5	45.3	46.1	F4JLM5	F4JLM5	885	At4g10320	Isoleucine--tRNA ligase, cytoplasmic
316979312896729	318395862579346	316881256103516	317984619140625	cell redox homeostasis [GO:0045454];oxidation-reduction process [GO:0055114];response to arsenic-containing substance [GO:0046685]	chloroplast [GO:0009507];chloroplast envelope [GO:0009941];chloroplast stroma [GO:0009570];cytosol [GO:0005829]	dihydrolipoyl dehydrogenase activity [GO:0004148];flavin adenine dinucleotide binding [GO:0050660]	50	0	323.31	1028	66.8	64.9	66	62.6	F4JLP5	F4JLP5	886	LPD2	Dihydrolipoyl dehydrogenase 2, chloroplastic
253392944335938	281538314819336	282468090057373	285640182495117		cytosol [GO:0005829];endoplasmic reticulum [GO:0005783];integral component of membrane [GO:0016021];plasma membrane [GO:0005886]		3	0	7.2705	13	2.6	1.3	1.3	1.3	F4JLQ2	F4JLQ2	887	At4g16180	Transmembrane protein
272307758331299	270898246765137	273691120147705	273974609375		peroxisome [GO:0005777]	dioxygenase activity [GO:0051213];metal ion binding [GO:0046872]	7	0	46.529	58	17.3	18.1	15.1	20.6	F4JLS2	F4JLS2	888	At4g16330	2-oxoglutarate (2OG) and Fe(II)-dependent oxygenase superfamily protein
248350887298584	24875114440918	251295509338379	246094722747803		chloroplast [GO:0009507];cytosol [GO:0005829]	kinase activity [GO:0016301];phosphotransferase activity, alcohol group as acceptor [GO:0016773]	27	0	6.8381	15	51.4	51.4	51.4	53.4	F4JM15	F4JM15	889	At4g28706	PfkB-like carbohydrate kinase family protein
281040458679199	279658164978027	279126796722412	279603595733643			dioxygenase activity [GO:0051213]	7	0	26.402	79	24.4	21.3	24.4	21.3	F4JML2	F4JML2	892	At4g16770	2-oxoglutarate (2OG) and Fe(II)-dependent oxygenase superfamily protein
255790843963623	253265628814697	249154739379883	NaN	branched-chain amino acid catabolic process [GO:0009083];fatty acid beta-oxidation [GO:0006635]	cytosol [GO:0005829];mitochondrion [GO:0005739]	enoyl-CoA hydratase activity [GO:0004300];methylglutaconyl-CoA hydratase activity [GO:0004490];peptidase activity [GO:0008233]	4	0.00019231	2.8441	5	12.6	7	7	0	F4JML5	F4JML5	893	At4g16800	Probable enoyl-CoA hydratase 2, mitochondrial
307893161773682	308106155395508	307596263885498	309930076599121	defense response to bacterium, incompatible interaction [GO:0009816];post-embryonic development [GO:0009791];protein folding [GO:0006457];protein targeting to chloroplast [GO:0045036];response to cadmium ion [GO:0046686];vegetative to reproductive phase transition of meristem [GO:0010228]	chloroplast [GO:0009507];cytoplasm [GO:0005737];integral component of chloroplast outer membrane [GO:0031359];nucleus [GO:0005634];plasma membrane [GO:0005886]		27	0	323.31	394	75.1	68.3	61.7	52.6	F4JN13	F4JN13	895	AKR2	Ankyrin repeat-containing protein 2
289624290466309	289921836853027	291310443878174	289822063446045		cytosol [GO:0005829]	endoribonuclease activity [GO:0004521]	20	0	323.31	257	62.4	41.1	41.1	41.1	F4JNE1	F4JNE1	898	At4g17100	Poly(U)-specific endoribonuclease-B protein
241137847900391	247636489868164	246481761932373	2438600730896		integral component of membrane [GO:0016021]	ATP binding [GO:0005524];protein kinase activity [GO:0004672]	3	0	6.1666	14	1.7	1.7	1.7	1.7	F4JNH2	F4JNH2	900	CRK18	Cysteine-rich RLK (RECEPTOR-like protein kinase) 18
254081764221191	256953792572021	261971549987793	258399486541748		integral component of membrane [GO:0016021]		8	0	61.781	39	5.8	7.1	8.9	8.9	F4JPQ4	F4JPQ4	906	AP22.38	G-protein coupled receptor
21606481552124	219569873809814	NaN	225422687530518	RNA processing [GO:0006396]		RNA binding [GO:0003723]	24	0	74.176	99	2	2.2	0	1.3	F4JQ75	F4JQ75	908	EMB140	EMBRYO DEFECTIVE 140
312452449798584	312328357696533	313416481018066	313549995422363	carbohydrate metabolic process [GO:0005975]	chloroplast [GO:0009507];cytosol [GO:0005829];plasma membrane [GO:0005886]	kinase activity [GO:0016301];phosphotransferase activity, alcohol group as acceptor [GO:0016773]	37	0	323.31	487	59.6	59.1	61.1	58.4	F4JQ90	F4JQ90	909	At4g30310	FGGY family of carbohydrate kinase
280021190643311	279931831359863	279792385101318	286412029266357	photosynthesis [GO:0015979]	chloroplast [GO:0009507];plasma membrane [GO:0005886]		24	0	105.39	151	22.6	21.8	20.9	23.2	F4JQE2	F4JQE2	910	PDE327	FAD/NAD(P)-binding oxidoreductase family protein
29268253326416	293206405639648	293887023925781	294186248779297	lipid metabolic process [GO:0006629]	plasma membrane [GO:0005886]	phosphoric diester hydrolase activity [GO:0008081]	13	0	113.28	158	23.8	21.1	21.3	18.4	F4JQJ7	F4JQJ7	911	At4g36945	PLC-like phosphodiesterases superfamily protein
255636329650879	NaN	257677459716797	253672962188721	activation of GTPase activity [GO:0090630];negative regulation of Rho protein signal transduction [GO:0035024];pollen germination [GO:0009846];pollen tube adhesion [GO:0009865];pollen tube development [GO:0048868];pollen tube growth [GO:0009860];positive regulation of GTPase activity [GO:0043547];regulation of growth [GO:0040008];signal transduction [GO:0007165]	apical part of cell [GO:0045177];apical plasma membrane [GO:0016324];cell cortex [GO:0005938];exocytic vesicle [GO:0070382];pollen tube [GO:0090406]	GTPase activator activity [GO:0005096];Rho GTPase binding [GO:0017048]	2	0.0095154	1.4989	8	1.7	0	1.7	1.7	F4JQZ3	F4JQZ3	913	REN1	Rho GTPase-activating protein REN1
331149253845215	32197681427002	3307421875	330942115783691	mitochondrial respiratory chain complex I assembly [GO:0032981];NADH dehydrogenase complex assembly [GO:0010257]	chloroplast [GO:0009507];chloroplast stroma [GO:0009570];cytosol [GO:0005829];vacuole [GO:0005773]	unfolded protein binding [GO:0051082]	51	0	323.31	662	60.4	58.1	60.3	60	F4JRN8	F4JRN8	915	At4g18810	NAD(P)-binding Rossmann-fold superfamily protein
254381904602051	256921081542969	254738273620605	254513301849365		integral component of membrane [GO:0016021]	ATP binding [GO:0005524];ATPase activity [GO:0016887];ATPase-coupled transmembrane transporter activity [GO:0042626]	6	0	7.5798	25	4.6	1.5	8.6	9	F4JSM3	F4JSM3	920	ABCB28	Non-intrinsic ABC protein 8
NaN	NaN	262896842956543	270577564239502	protein transport [GO:0015031];regulation of ARF protein signal transduction [GO:0032012]	chloroplast [GO:0009507];cytosol [GO:0005829];membrane [GO:0016020];trans-Golgi network [GO:0005802]	ARF guanyl-nucleotide exchange factor activity [GO:0005086]	25	0	37.132	57	0	0.5	1.7	1	F4JSZ5	F4JSZ5	921	BIG1	Brefeldin A-inhibited guanine nucleotide-exchange protein 1
240288429260254	NaN	235479259490967	239967098236084			dioxygenase activity [GO:0051213]	1	0.0047127	1.8636	10	2.5	0	2.5	2.5	F4JT13	F4JT13	922	At4g13400	2-oxoglutarate (2OG) and Fe(II)-dependent oxygenase superfamily protein
28495641708374	284495525360107	287520027160645	285313701629639	mRNA cis splicing, via spliceosome [GO:0045292];regulation of alternative mRNA splicing, via spliceosome [GO:0000381]	nuclear speck [GO:0016607];nucleolus [GO:0005730];nucleus [GO:0005634]	RNA binding [GO:0003723]	4	0	29.369	22	3.9	1.6	1.6	1.6	F4JT92	F4JT92	924	At4g19610	Nucleotide/nucleic acid binding protein
279895610809326	280978317260742	280508728027344	276281890869141	dephosphorylation [GO:0016311];glycerol biosynthetic process [GO:0006114];riboflavin biosynthetic process [GO:0009231]	mitochondrion [GO:0005739]	glycerol-1-phosphatase activity [GO:0000121];glycerol-3-phosphatase activity [GO:0043136];magnesium ion binding [GO:0000287];phosphatase activity [GO:0016791]	23	0	172.78	128	24.8	28.2	38.6	35.6	F4JTE7	F4JTE7	926	GPP1	(DL)-glycerol-3-phosphatase 1, mitochondrial
265508060455322	263219776153564	253637599945068	259445400238037	mitotic sister chromatid cohesion [GO:0007064]			15	0	39.815	56	5	6.3	3	7.2	F4JTF2	F4JTF2	927	At4g31880	Transcriptional regulator
NaN	218700428009033	221523933410645	216895313262939		vacuole [GO:0005773]		26	0	134.19	121	0	2.3	1.5	1.5	F4JTI1	F4JTI1	928	PHOX4	Protein PHOX4
215957775115967	222561492919922	221815910339355	225445346832275	protein transport [GO:0015031]	cytoplasm [GO:0005737];cytosol [GO:0005829];endosome membrane [GO:0010008]	phosphatidylinositol binding [GO:0035091]	10	0	21.103	24	2.4	2.4	2.4	3.6	F4JTJ2	F4JTJ2	929	EREL1	PX domain-containing protein EREL1
245135822296143	246247215270996	245498657226563	247428855895996	synaptonemal complex assembly [GO:0007130]	chromosome [GO:0005694];nucleus [GO:0005634]		5	0	3.8705	10	0.9	0.9	0.9	0.9	F4JTJ9	F4JTJ9	930	ASY2	Meiosis-specific protein ASY2
325286674499512	325534133911133	325508499145508	326474647521973	cellular amino acid metabolic process [GO:0006520];response to zinc ion [GO:0010043]	endoplasmic reticulum [GO:0005783];Golgi apparatus [GO:0005794];plasma membrane [GO:0005886];secretory vesicle [GO:0099503];vacuole [GO:0005773]	aminoacylase activity [GO:0004046];metallopeptidase activity [GO:0008237]	43	0	323.31	864	79.7	76.7	78.5	74.1	F4JTK8	F4JTK8	931	AQI	Peptidase M20/M25/M40 family protein
247532272338867	243626575469971	246457042694092	250230140686035				5	0	3.6033	25	2.9	10.2	10.2	6.2	F4JTM0	F4JTM0	932	At4g38260	Transport/golgi organization-like protein (DUF833)
234937496185303	NaN	238543376922607	241549911499023				6	0	7.9797	9	2	2.2	2.5	3.2	F4JTS7	F4JTS7	935	At4g13730	Ypt/Rab-GAP domain of gyp1p superfamily protein
292436351776123	293470993041992	292564697265625	293141498565674	COPII-coated vesicle cargo loading [GO:0090110];intracellular protein transport [GO:0006886]	COPII vesicle coat [GO:0030127];cytosol [GO:0005829];endoplasmic reticulum exit site [GO:0070971];endoplasmic reticulum membrane [GO:0005789];Golgi membrane [GO:0000139]	GTPase activator activity [GO:0005096];zinc ion binding [GO:0008270]	43	0	323.31	358	25.4	30.5	31.2	19.8	F4JUM1	F4JUM1	938	At4g14160	Protein transport protein SEC23
NaN	237222366333008	234969215393066	233800735473633		cytoplasm [GO:0005737]	translation elongation factor activity [GO:0003746]	3	0.0020333	2.17	12	3.4	3.4	3.4	3.4	F4JUX3	F4JUX3	940	At4g26310	Elongation factor P (EF-P) family protein
328137512207031	327869834899902	328005828857422	328868751525879	proteolysis [GO:0006508]	chloroplast [GO:0009507];cytoplasm [GO:0005737];cytosol [GO:0005829];cytosolic ribosome [GO:0022626];vacuolar membrane [GO:0005774];vacuole [GO:0005773]	aminopeptidase activity [GO:0004177];serine-type endopeptidase activity [GO:0004252];tripeptidyl-peptidase activity [GO:0008240]	158	0	323.31	1794	59.3	53.2	54.3	57.7	F4JVN6	F4JVN6	942	TPP2	Tripeptidyl-peptidase 2
258040027618408	253180351257324	253264255523682	251122341156006	L-lysine catabolic process [GO:0019477];response to karrikin [GO:0080167]	cytoplasm [GO:0005737];cytosol [GO:0005829]	saccharopine dehydrogenase (NADP+, L-lysine-forming) activity [GO:0047130];saccharopine dehydrogenase activity [GO:0004753]	62	0	253.6	288	0.7	0.7	2.3	1.9	F4JVY8	F4JVY8	943	LKR	Lysine-ketoglutarate reductase/saccharopine dehydrogenase bifunctional enzyme
273711910247803	273162231445313	274124794006348	272763080596924	cinnamic acid biosynthetic process [GO:0009800];L-phenylalanine catabolic process [GO:0006559]	cytoplasm [GO:0005737]	phenylalanine ammonia-lyase activity [GO:0045548]	22	0	42.237	67	18.5	13.3	16.9	18.3	F4JW69	F4JW69	944	PAL3	Phenylalanine ammonia-lyase
217025661468506	NaN	21500524520874	214483394622803		CCR4-NOT complex [GO:0030014]		20	0	127.61	99	2.1	0	2.7	2.7	F4JWN4	F4JWN4	945	At5g18420	CCR4-NOT transcription complex subunit
247253093719482	250238609313965	NaN	248610286712646	microtubule-based movement [GO:0007018];trichome branching [GO:0010091]	cytoskeleton [GO:0005856];plasma membrane [GO:0005886]	ATP binding [GO:0005524];microtubule binding [GO:0008017];microtubule motor activity [GO:0003777];oxidoreductase activity [GO:0016491]	8	0	5.5901	18	0.6	0.6	0	0.6	F4JXM5	F4JXM5	951	ZWI	Kinesin-like calmodulin-binding protein (ZWICHEL)
24384428024292	241333599090576	242490177154541	236967849731445	intracellular protein transport [GO:0006886];vesicle-mediated transport [GO:0016192]	AP-4 adaptor complex [GO:0030124];clathrin adaptor complex [GO:0030131]	clathrin binding [GO:0030276]	30	0	164.79	149	4.7	5.5	3.2	0.8	F4JXV9	F4JXV9	953	At5g11490	Beta-adaptin-like protein
NaN	240855350494385	236076107025146	237698135375977		integral component of membrane [GO:0016021]		4	0	3.2632	9	0	1.8	2.4	3	F4JXY5	F4JXY5	955	At5g11700	Ephrin type-B receptor
27971529006958	283810062408447	281578369140625	282032642364502	embryo development ending in seed dormancy [GO:0009793];folic acid-containing compound biosynthetic process [GO:0009396];one-carbon metabolic process [GO:0006730];tetrahydrofolate biosynthetic process [GO:0046654]	cytoplasm [GO:0005737];cytosol [GO:0005829];mitochondrial matrix [GO:0005759];mitochondrion [GO:0005739]	ATP binding [GO:0005524];dihydrofolate synthase activity [GO:0008841];metal ion binding [GO:0046872];tetrahydrofolylpolyglutamate synthase activity [GO:0004326]	10	0	34.945	59	20.2	13.4	16	16	F4JYE9	F4JYE9	959	DHFS	Dihydrofolate synthetase
252503185272217	NaN	226378993988037	246483955383301	mitotic sister chromatid cohesion [GO:0007064]			54	0	181.32	229	2.5	0.9	0.9	0.7	F4JYL8	F4JYL8	960	At5g47690	Binding protein
2437424659729	232989387512207	239686870574951	238285179138184	N-glycan processing [GO:0006491];protein deglycosylation [GO:0006517]	cytoplasm [GO:0005737];cytosol [GO:0005829];vacuole [GO:0005773]	mannosyl-glycoprotein endo-beta-N-acetylglucosaminidase activity [GO:0033925]	12	0	15.384	46	1.8	1.8	3.2	2.9	F4JZC2	F4JZC2	963	ENGASE1	Cytosolic endo-beta-N-acetylglucosaminidase 1
252554798126221	25252161026001	254086303710938	256617469787598	mRNA splicing, via spliceosome [GO:0000398];spliceosomal complex assembly [GO:0000245]	catalytic step 2 spliceosome [GO:0071013];plastid [GO:0009536];post-mRNA release spliceosomal complex [GO:0071014];Prp19 complex [GO:0000974];U2-type catalytic step 2 spliceosome [GO:0071007]		7	0	19.622	20	1.3	1.3	1.3	1.3	F4JZX8	F4JZX8	965	At5g41770	Crooked neck protein, putative / cell cycle protein
230774745941162	232913703918457	251484107971191	229648513793945	abscisic acid-activated signaling pathway [GO:0009738];cellular response to abscisic acid stimulus [GO:0071215];positive regulation of abscisic acid-activated signaling pathway [GO:0009789];regulation of protein import into nucleus [GO:0042306];response to abscisic acid [GO:0009737];response to osmotic stress [GO:0006970]	cytoskeleton [GO:0005856];cytosol [GO:0005829];plasma membrane [GO:0005886];plastid [GO:0009536];vacuolar membrane [GO:0005774];vacuole [GO:0005773]	actin binding [GO:0003779]	65	0	316.69	214	3	3	4	4.4	F4JZY1	F4JZY1	966	CIP1	COP1-interactive protein 1
314544448852539	315497703552246	315135688781738	315692806243896		cytoplasm [GO:0005737];cytosol [GO:0005829];mitochondrion [GO:0005739];nucleus [GO:0005634];plastid [GO:0009536]	hydrolase activity [GO:0016787]	36	0	283.32	581	70	75.3	73.5	75.3	F4K000	F4K000	968	MJC20.7	Metal-dependent protein hydrolase
293329601287842	296801643371582	290751819610596	288826198577881	carbohydrate metabolic process [GO:0005975]		hydrolase activity, hydrolyzing O-glycosyl compounds [GO:0004553]	10	0	72.001	54	18.7	18.2	20.8	15.8	F4K020	F4K020	969	BG_PPAP	Beta-1,3-glucanase
283499279022217	284287414550781	285597591400146	284600620269775	tryptophan metabolic process [GO:0006568]		indole-3-glycerol-phosphate synthase activity [GO:0004425]	14	0	66.626	124	37.6	30.8	35.4	37.4	F4K083	F4K083	970	MIF21.11	Aldolase-type TIM barrel family protein
274831619262695	276774101257324	274641189575195	279859294891357	cell plate assembly [GO:0000919];cytokinesis by cell plate formation [GO:0000911];early endosome to Golgi transport [GO:0034498];intra-Golgi vesicle-mediated transport [GO:0006891]	cytosol [GO:0005829];early endosome [GO:0005769];trans-Golgi network [GO:0005802];TRAPPII protein complex [GO:1990071]		39	0	176.52	288	7.9	11.8	9.2	11	F4K0C4	F4K0C4	971	TRS130	Trafficking protein particle complex II-specific subunit 130 homolog
250894203186035	243605823516846	245471019744873	249239292144775	regulation of translational fidelity [GO:0006450]	cytoplasm [GO:0005737]	double-stranded RNA binding [GO:0003725];nucleotidyltransferase activity [GO:0016779];tRNA binding [GO:0000049]	3	0	7.388	9	12.5	5.9	5.9	6.6	F4K0E6	F4K0E6	972	MUP24.1	DHBP synthase RibB-like alpha/beta domain-containing protein
308899765014648	309681549072266	309458675384521	309612007141113	isopentenyl diphosphate biosynthetic process, methylerythritol 4-phosphate pathway [GO:0019288];response to bacterium [GO:0009617];systemic acquired resistance, salicylic acid mediated signaling pathway [GO:0009862];terpenoid biosynthetic process [GO:0016114]	chloroplast [GO:0009507];chloroplast envelope [GO:0009941];chloroplast stroma [GO:0009570];plastid [GO:0009536]	4 iron, 4 sulfur cluster binding [GO:0051539];4-hydroxy-3-methylbut-2-en-1-yl diphosphate synthase activity [GO:0046429];iron ion binding [GO:0005506]	48	0	323.31	525	57.8	51.8	53.6	57.2	F4K0E8	F4K0E8	973	ISPG	4-hydroxy-3-methylbut-2-en-1-yl diphosphate synthase (ferredoxin), chloroplastic
278383388519287	284028778076172	277768707275391	277308502197266		chloroplast [GO:0009507]	nucleoside-triphosphate diphosphatase activity [GO:0047429]	10	0	49.93	78	30.4	34.8	34.8	36.7	F4K0M7	F4K0M7	974	At5g66550	Maf-like protein
261114978790283	257362422943115	257914638519287	262297496795654	methylation [GO:0032259];vesicle-mediated transport [GO:0016192]	integral component of membrane [GO:0016021]	methyltransferase activity [GO:0008168];nucleic acid binding [GO:0003676]	11	0	45.82	64	3.9	2.8	4.2	4.2	F4K0R0	F4K0R0	975	MOP10.11	Transducin family protein / WD-40 repeat family protein
272007884979248	274208545684814	272318744659424	277056312561035		chloroplast [GO:0009507];chloroplast envelope [GO:0009941];chloroplast stroma [GO:0009570]	hydrolase activity [GO:0016787]	11	0	19.485	61	12.5	11	8.2	12.3	F4K1G7	F4K1G7	979	MEE13.8	P-loop containing nucleoside triphosphate hydrolases superfamily protein
291042213439941	291325645446777	291994094848633	292235908508301			oxidoreductase activity [GO:0016491]	22	0	85.722	223	43.1	44	42.4	39.5	F4K1P8	F4K1P8	980	MJE7.7	FAD-dependent oxidoreductase family protein
19172384262085	188597221374512	NaN	199424915313721	mRNA destabilization [GO:0061157]	cytoplasm [GO:0005737]	mRNA binding [GO:0003729]	14	0	72.297	41	5.1	1.8	3.2	1.8	F4K1Z0	F4K1Z0	981	ECT3	YTH domain-containing protein ECT3
262883987426758	262450504302979	NaN	264920845031738	histone modification [GO:0016570];transcription elongation from RNA polymerase II promoter [GO:0006368]	Cdc73/Paf1 complex [GO:0016593]		5	0	23.954	13	3.7	3.7	0	3.7	F4K204	F4K204	982	VIP4	Leo1-like family protein
258467788696289	266948471069336	268222579956055	274060859680176				9	0	14.649	32	1.1	2.5	2.5	2.5	F4K250	F4K250	983	MUD21.5	Ran-binding protein in the microtubule-organising centre protein
240693187713623	235040950775146	239743003845215	240051326751709	autophagosome assembly [GO:0000045];protein transport [GO:0015031]	autophagosome [GO:0005776];cytoplasmic vesicle [GO:0031410];phagophore assembly site [GO:0000407]		3	0.0032937	2.0212	3	4.2	4.2	4.2	4.2	F4K265	F4K265	984	ATG101	Autophagy-related protein 101
298291568756104	300043716430664	299333992004395	300863857269287	folic acid-containing compound biosynthetic process [GO:0009396];lignin biosynthetic process [GO:0009809];one-carbon metabolic process [GO:0006730];quiescent center organization [GO:1904961];root development [GO:0048364];root hair elongation [GO:0048767];root meristem growth [GO:0010449];tetrahydrofolylpolyglutamate biosynthetic process [GO:0046901]	chloroplast [GO:0009507];cytoplasm [GO:0005737];cytosol [GO:0005829];mitochondrion [GO:0005739]	ATP binding [GO:0005524];metal ion binding [GO:0046872];tetrahydrofolylpolyglutamate synthase activity [GO:0004326]	34	0	305.1	383	41.9	38	37.5	42.7	F4K2A1;REV__Q9MB58	F4K2A1	985	FPGS1	Folylpolyglutamate synthase
322695236206055	323027992248535	32210132598877	322510147094727		chloroplast [GO:0009507];cytosol [GO:0005829];plastid [GO:0009536]	serine-type peptidase activity [GO:0008236]	62	0	323.31	860	55.9	50	63.7	57.3	F4K2Y3	F4K2Y3	987	MAB16.20	Alpha/beta-Hydrolases superfamily protein
280050144195557	281733131408691	281689701080322	282527751922607			nucleoside-triphosphate diphosphatase activity [GO:0047429]	16	0	32.916	97	47.1	57.3	53.9	54.4	F4K331	F4K331	988	MJB21.15	Maf-like protein
301287860870361	302381992340088	301226272583008	301145839691162		chloroplast [GO:0009507];chloroplast stroma [GO:0009570]	5'-nucleotidase activity [GO:0008253];metal ion binding [GO:0046872]	35	0	240.76	320	41.9	40.2	42.8	41.3	F4K3A9	F4K3A9	989	At5g48960	HAD-superfamily hydrolase, subfamily IG, 5'-nucleotidase
NaN	265656967163086	242538566589355	NaN			ATP binding [GO:0005524];ligase activity [GO:0016874];protein kinase activity [GO:0004672]	36	0	84.788	119	0	1	1.4	0	F4K3Z6	F4K3Z6	991	KEG	Protein kinasesubiquitin-protein ligase
271908416748047	265887794494629	267263736724854	263379020690918	protein stabilization [GO:0050821];response to cold [GO:0009409];rRNA processing [GO:0006364]	chloroplast [GO:0009507];ribonucleoprotein complex [GO:1990904]	GTP binding [GO:0005525];GTPase activity [GO:0003924];translation elongation factor activity [GO:0003746]	19	0	69.388	57	24.6	25.8	25.2	20.9	F4K410	F4K410	992	SVR3	Putative elongation factor TypA-like SVR3, chloroplastic
243436050415039	247326240539551	247396965026855	249660491943359				2	0	4.056	46	10.3	10.3	10.3	10.3	F4K464	F4K464	994	At5g20190	Tetratricopeptide repeat (TPR)-like superfamily protein
237568454742432	212055625915527	NaN	NaN	cellular response to hypoxia [GO:0071456];response to cold [GO:0009409];response to karrikin [GO:0080167];response to oxidative stress [GO:0006979]	chloroplast [GO:0009507];cytosol [GO:0005829];plasmodesma [GO:0009506]	catalytic activity [GO:0003824];mRNA binding [GO:0003729]	55	0	282.51	314	0.8	0.8	0	0	F4K470	F4K470	996	DIN10	Raffinose synthase family protein
247947635650635	NaN	241106815338135	NaN	protein catabolic process [GO:0030163];proteolysis [GO:0006508]	endosome [GO:0005768];Golgi apparatus [GO:0005794];integral component of membrane [GO:0016021];trans-Golgi network [GO:0005802]	aspartic-type endopeptidase activity [GO:0004190]	3	0	7.5469	9	2.7	0	1.4	0	F4K4L3	F4K4L3	1000	MMG4.12	Eukaryotic aspartyl protease family protein
26426944732666	287123374938965	283439273834229	285564365386963	DNA repair [GO:0006281]	plasmodesma [GO:0009506]	DNA polymerase binding [GO:0070182]	4	0	3.6628	17	1.2	0.5	1.6	0.5	F4K4R1	F4K4R1	1001	At5g49110	Fanconi anemia group I-like protein
257082252502441	26167142868042	255584163665771	263979015350342	regulation of double-strand break repair [GO:2000779]	mitochondrion [GO:0005739];nucleus [GO:0005634];plastid [GO:0009536]	histone binding [GO:0042393]	14	0	27.127	56	11.4	11.4	15.9	12.5	F4K4Y5	F4K4Y5	1002	MDF20.10	DEK domain-containing chromatin associated protein
309601650238037	309534511566162	30830623626709	308141345977783	protein catabolic process [GO:0030163];proteolysis [GO:0006508]	cell wall [GO:0005618]	aspartic-type endopeptidase activity [GO:0004190]	27	0	78.707	304	40	37.6	37.6	33.8	F4K5B9	F4K5B9	1004	MOJ9.20	Eukaryotic aspartyl protease family protein
276189098358154	286570377349854	261493034362793	277484874725342	actin filament organization [GO:0007015];actin filament-based movement [GO:0030048];cell division [GO:0051301];fruit development [GO:0010154];Golgi localization [GO:0051645];gynoecium development [GO:0048467];leaf pavement cell development [GO:0090436];mitochondrion localization [GO:0051646];peroxisome localization [GO:0060151];post-embryonic development [GO:0009791];root hair cell tip growth [GO…	actin cytoskeleton [GO:0015629];cytoplasm [GO:0005737];myosin complex [GO:0016459];plasmodesma [GO:0009506];root hair tip [GO:0035619];transport vesicle [GO:0030133];vesicle [GO:0031982]	actin filament binding [GO:0051015];actin-dependent ATPase activity [GO:0030898];ATP binding [GO:0005524];calmodulin binding [GO:0005516];microfilament motor activity [GO:0000146];motor activity [GO:0003774]	65	0	205.6	223	1.4	0.7	1.9	1.4	F4K5J1	F4K5J1	1005	XI-K	Myosin-17
257318725585938	257182178497314	250739002227783	266706066131592	cysteine biosynthetic process from serine [GO:0006535];cysteine homeostasis [GO:0080145];response to oxidative stress [GO:0006979];stress response to cadmium ion [GO:1990170]	cytoplasm [GO:0005737]	cystathionine gamma-lyase activity [GO:0004123];cysteine synthase activity [GO:0004124];L-cysteine desulfhydrase activity [GO:0080146];L-cystine L-cysteine-lyase (deaminating) [GO:0044540];pyridoxal phosphate binding [GO:0030170]	9	0.0022144	2.14	8	15.8	18.3	23.2	22.3	F4K5T2	F4K5T2	1008	DES1	Bifunctional cystathionine gamma-lyase/cysteine synthase
246215381622314	242555866241455	246203651428223	245807819366455				2	0.0064251	1.6469	12	0.9	0.9	0.9	0.9	F4K5Y6	F4K5Y6	1010	MNL12.14	COP1-interacting protein-like protein
256050109863281	255759143829346	260985851287842	236458148956299	defense response [GO:0006952];defense response to fungus [GO:0050832];defense response to insect [GO:0002213];response to wounding [GO:0009611]		serine-type endopeptidase inhibitor activity [GO:0004867]	7	0	40.128	26	9.1	9.1	9.1	19.2	F4K627	F4K627	1011	UPI	Serine protease inhibitor, potato inhibitor I-type family protein
232353630065918	234355525970459	247510318756104	232031135559082		mitochondrion [GO:0005739];plastid [GO:0009536]	copper ion binding [GO:0005507];oxidoreductase activity [GO:0016491]	13	0	64.283	51	6.3	8.5	9.9	5.6	F4K658	F4K658	1012	At5g49555	FAD/NAD(P)-binding oxidoreductase family protein
288763103485107	290479393005371	289926433563232	291048717498779			hydrolase activity [GO:0016787]	22	0	101.23	163	18.4	18.7	18.4	16.4	F4K6N3	F4K6N3	1014	At5g07360	Amidase family protein
282076930999756	280972805023193	283272743225098	281133670806885		cell wall [GO:0005618];extracellular region [GO:0005576];plasmodesma [GO:0009506]	copper ion binding [GO:0005507];oxidoreductase activity [GO:0016491]	16	0	94.314	126	18.4	14.6	24.1	24.7	F4K6Z5	F4K6Z5	1015	At5g21105	Plant L-ascorbate oxidase
NaN	240713653564453	232896842956543	NaN			RNA binding [GO:0003723]	12	0	33.021	39	0	3	1	0	F4K703	F4K703	1016	LARP1a	LA RNA-binding protein
NaN	247767066955566	252472438812256	25108570098877	actin filament organization [GO:0007015];actin filament-based movement [GO:0030048];Golgi localization [GO:0051645];gynoecium development [GO:0048467];leaf pavement cell development [GO:0090436];mitochondrion localization [GO:0051646];peroxisome localization [GO:0060151];root hair elongation [GO:0048767];trichome morphogenesis [GO:0010090]	cytosol [GO:0005829];myosin complex [GO:0016459];peroxisome [GO:0005777]	actin binding [GO:0003779];ATP binding [GO:0005524];GTP-dependent protein binding [GO:0030742];motor activity [GO:0003774];Rab GTPase binding [GO:0017137]	31	0	101.76	89	0	1.3	0.6	0.7	F4K7C5	F4K7C5	1018	MYA2	Myosin 2
250302314758301	248912925720215	248750686645508	251539096832275			kinase activity [GO:0016301];phosphotransferase activity, alcohol group as acceptor [GO:0016773]	3	0	6.9459	9	6.6	6.6	6.6	6.6	F4K7C7	F4K7C7	1019	At5g43910	PfkB-like carbohydrate kinase family protein
245361137390137	NaN	254947872161865	261871643066406			tRNA methyltransferase activity [GO:0008175]	2	0	3.0251	11	13.1	0	13.1	13.1	F4K7Z6	F4K7Z6	1020	At5g01230	S-adenosyl-L-methionine-dependent methyltransferases superfamily protein
260424327850342	NaN	NaN	261677551269531	dephosphorylation of RNA polymerase II C-terminal domain [GO:0070940];developmental growth [GO:0048589];response to auxin [GO:0009733];response to osmotic stress [GO:0006970]		phosphatase activity [GO:0016791];RNA binding [GO:0003723];RNA polymerase II CTD heptapeptide repeat phosphatase activity [GO:0008420]	7	0	6.8518	19	3.1	0	0	3.1	F4K802	F4K802	1021	CPL2	Carboxyl-terminal domain (Ctd) phosphatase-like 2
28392147064209	284489631652832	292430438995361	288768081665039	exocytosis [GO:0006887];protein transport [GO:0015031]	cytosol [GO:0005829];exocyst [GO:0000145];plasma membrane [GO:0005886]		13	0	19.333	39	2.8	2.8	2.8	2.8	F4K8Y6	F4K8Y6	1023	EXO70F1	Exocyst subunit Exo70 family protein
244309673309326	243251914978027	251877861022949	241472473144531		plasmodesma [GO:0009506]		4	0	4.2855	8	5.3	2.2	2.2	7.3	F4K940	F4K940	1024	MIK19.5	Uncharacterized protein
266643810272217	269408931732178	266714172363281	267885551452637	protein phosphorylation [GO:0006468]	integral component of membrane [GO:0016021];plasma membrane [GO:0005886]	ATP binding [GO:0005524];transmembrane receptor protein serine/threonine kinase activity [GO:0004675]	6	0	16.801	29	1.2	4.2	2.7	2.7	F4K946	F4K946	1025	At5g56890	Protein kinase superfamily protein
25265064239502	231791610717773	245469856262207	24187219619751		cytoplasm [GO:0005737];cytosol [GO:0005829];nucleus [GO:0005634]	zinc ion binding [GO:0008270]	17	0	130.29	84	9.9	2.2	10.1	2	F4K9W6	F4K9W6	1027	MQJ16.2	ZPR1 zinc-finger domain protein
331768226623535	335819473266602	336935348510742	334409713745117	carbon fixation [GO:0015977];photorespiration [GO:0009853];photosynthesis [GO:0015979]	chloroplast [GO:0009507]	monooxygenase activity [GO:0004497];ribulose-bisphosphate carboxylase activity [GO:0016984]	26	0	323.31	378	67.2	67.2	67.2	67.2	F4KA76	F4KA76	1031	RBCS3B	Ribulose bisphosphate carboxylase small chain
254985046386719	255298137664795	255576286315918	254208869934082	methylation [GO:0032259]		methyltransferase activity [GO:0008168]	4	0	5.5611	22	2.4	6.3	13.5	13.5	F4KAB4	F4KAB4	1032	At5g44600	S-adenosyl-L-methionine-dependent methyltransferases superfamily protein
311208362579346	311268177032471	310279541015625	310101203918457	DNA replication initiation [GO:0006270];DNA unwinding involved in DNA replication [GO:0006268];double-strand break repair via break-induced replication [GO:0000727];mitotic DNA replication [GO:1902969];pre-replicative complex assembly involved in nuclear cell cycle DNA replication [GO:0006267]	MCM complex [GO:0042555];nucleus [GO:0005634];THO complex [GO:0000347]	ATP binding [GO:0005524];DNA helicase activity [GO:0003678];DNA replication origin binding [GO:0003688];metal ion binding [GO:0046872];single-stranded DNA binding [GO:0003697]	14	0	19.514	48	2.5	2.5	2.5	2.5	F4KAB8	F4KAB8	1033	MCM6	DNA replication licensing factor MCM6
255582408905029	257146854400635	257328567504883	259446296691895			syntaxin binding [GO:0019905]	4	0.0034722	1.9861	8	2.2	2.2	2.2	2.2	F4KAG0	F4KAG0	1034	At5g50840	Alpha-taxilin-like protein
249137401580811	246263370513916	24894718170166	245710906982422		chloroplast [GO:0009507]		2	0	5.7179	14	16.4	10.3	10.3	10.3	F4KAK0	F4KAK0	1035	MUL3.12	Tautomerase/MIF superfamily protein
279218997955322	256512184143066	263255500793457	260614490509033	cell morphogenesis [GO:0000902]	cell cortex [GO:0005938];plasma membrane [GO:0005886];site of polarized growth [GO:0030427]		16	0	30.506	57	1	0.9	0.9	1.3	F4KB73	F4KB73	1036	At5g15680	ARM repeat superfamily protein
278478660583496	277143707275391	276245670318604	280715808868408	fatty acid metabolic process [GO:0006631]	peroxisome [GO:0005777]	ligase activity [GO:0016874]	29	0	142.02	157	14.3	11.2	15.1	12.8	F4KBF3	F4KBF3	1037	AAE17	Probable acyl-activating enzyme 17, peroxisomal
286672267913818	275522289276123	278629570007324	278875675201416	tetrahydrobiopterin biosynthetic process [GO:0006729]		4-alpha-hydroxytetrahydrobiopterin dehydratase activity [GO:0008124]	10	0	135.17	103	42	30.1	32.6	23.8	F4KBV0	F4KBV0	1039	MWD22.5	Transcriptional coactivator/pterin dehydratase
276147041320801	NaN	279997024536133	283162231445313	defense response to fungus [GO:0050832];protein ubiquitination [GO:0016567];regulation of lipid catabolic process [GO:0050994];regulation of seed germination [GO:0010029];response to abscisic acid [GO:0009737];ubiquitin-dependent protein catabolic process [GO:0006511];ubiquitin-dependent protein catabolic process via the N-end rule pathway [GO:0071596]	cytoplasm [GO:0005737];ubiquitin ligase complex [GO:0000151]	ubiquitin protein ligase activity [GO:0061630];ubiquitin-protein transferase activity [GO:0004842];zinc ion binding [GO:0008270]	14	0	11.326	41	2.1	0.5	2.1	2.1	F4KCC2	F4KCC2	1041	PRT6	E3 ubiquitin-protein ligase PRT6
235576572418213	NaN	216133785247803	NaN				34	0	84.316	121	0.9	0	0.6	0	F4KCQ9	F4KCQ9	1044	At5g16280	Tetratricopeptide repeat (TPR)-like superfamily protein
239057312011719	NaN	242195587158203	241409435272217		plasma membrane [GO:0005886]		1	0.0071073	1.5844	10	2.9	2.9	2.9	2.9	F4KCX6	F4KCX6	1045	MQM1.23	Uncharacterized protein
244110584259033	246816387176514	244184761047363	248400459289551		apoplast [GO:0048046];cell wall [GO:0005618]	manganese ion binding [GO:0030145];nutrient reservoir activity [GO:0045735]	3	0	8.2068	38	8	8	8	8	F4KD16	F4KD16	1046	At5g39160	Germin-like protein
270972805023193	273277454376221	274215774536133	273454494476318			hydrolase activity [GO:0016787]	11	0	44.196	92	35	34.6	28.8	27.2	F4KDK1	F4KDK1	1047	MCK7.7	Calcineurin-like metallo-phosphoesterase superfamily protein
303252811431885	306687316894531	304020233154297	307089881896973	embryo development ending in seed dormancy [GO:0009793];tRNA aminoacylation for protein translation [GO:0006418];valyl-tRNA aminoacylation [GO:0006438]	chloroplast [GO:0009507];chloroplast stroma [GO:0009570];cytosol [GO:0005829];mitochondrion [GO:0005739]	aminoacyl-tRNA editing activity [GO:0002161];ATP binding [GO:0005524];valine-tRNA ligase activity [GO:0004832]	59	0	179.82	464	41.5	36.8	40.8	41.3	F4KE63	F4KE63	1048	EMB2247	Valine--tRNA ligase, chloroplastic/mitochondrial 2
NaN	256671447753906	255239067077637	254675903320313	regulation of protein serine/threonine phosphatase activity [GO:0080163];regulation of signal transduction [GO:0009966]	nucleus [GO:0005634];plastid [GO:0009536]	protein phosphatase inhibitor activity [GO:0004864]	4	0	7.2208	14	0	7.8	7.8	15	F4KEU1	F4KEU1	1050	I-2	Phosphoprotein phosphatase inhibitor
244430370330811	NaN	NaN	24488489151001		cytosol [GO:0005829]	adenosine 5'-monophosphoramidase activity [GO:0043530];adenylylsulfatase activity [GO:0047627];bis(5'-adenosyl)-triphosphatase activity [GO:0047710];nucleotide binding [GO:0000166]	2	0	9.9386	2	7.2	0	0	26.1	F4KEV7	F4KEV7	1051	FHIT	Bifunctional bis(5'-adenosyl)-triphosphatase/adenylylsulfatase FHIT
236945552825928	265568981170654	NaN	NaN	intracellular signal transduction [GO:0035556];peptidyl-serine phosphorylation [GO:0018105]	cytosol [GO:0005829]	ATP binding [GO:0005524];kinase activity [GO:0016301];protein serine/threonine kinase activity [GO:0004674]	10	0	81.702	32	3.3	1.6	1.6	0	F4KFD4	F4KFD4	1052	MYH9.10	Non-specific serine/threonine protein kinase
281056957244873	279930744171143	281128692626953	279850063323975	thiamine biosynthetic process [GO:0009228]	cytosol [GO:0005829];mitochondrion [GO:0005739]	thiaminase activity [GO:0050334];thiamine phosphate phosphatase activity [GO:0042131]	19	0	47.515	138	21.6	20.4	20.9	19	F4KFT7	F4KFT7	1053	TH2	Bifunctional TH2 protein, mitochondrial
29915132522583	299383163452148	299124221801758	304759540557861			serine-type endopeptidase activity [GO:0004252]	23	0	122.51	187	41.2	48.4	41.2	43.8	F4KFV6	F4KFV6	1054	DEG8	Trypsin family protein with PDZ domain-containing protein
290910110473633	290172004699707	289792652130127	291473445892334		nucleolus [GO:0005730];plastid [GO:0009536]	GTP binding [GO:0005525];GTPase activity [GO:0003924]	58	0	257.86	401	26.5	21.9	22.2	22.9	F4KG14	F4KG14	1056	MCL19.12	Guanylate-binding family protein
282777271270752	282988090515137	284059238433838	280611095428467	fructose 1,6-bisphosphate metabolic process [GO:0030388];gluconeogenesis [GO:0006094];glycolytic process [GO:0006096]	cytosol [GO:0005829]	fructose-bisphosphate aldolase activity [GO:0004332]	21	0	27.497	84	26.7	39.4	36.4	31.3	F4KGQ0	F4KGQ0	1059	FBA4	Fructose-bisphosphate aldolase 4, cytosolic
301987056732178	302640533447266	304609985351563	305532550811768	lytic vacuole organization [GO:0080171]	chloroplast [GO:0009507];cytosol [GO:0005829];plasma membrane [GO:0005886]	kinase activity [GO:0016301]	189	0	323.31	1399	18.4	17.7	21.5	21	F4KHD5	F4KHD5	1060	MPO12.160	A-kinase anchor-like protein
292469215393066	293450908660889	292837448120117	290846138000488		chloroplast thylakoid lumen [GO:0009543];thylakoid lumen [GO:0031977]	endopeptidase activity [GO:0004175];serine-type peptidase activity [GO:0008236]	24	0	88.135	124	39.7	45.8	42.1	39.7	F4KHG6	F4KHG6	1061	CTPA1	Carboxyl-terminal-processing peptidase 1, chloroplastic
274466381072998	265599346160889	2749587059021	279549903869629	D-serine biosynthetic process [GO:0070179];L-serine biosynthetic process [GO:0006564]		phosphatase activity [GO:0016791];phosphoserine phosphatase activity [GO:0004647]	21	0	79.614	75	4.2	4.2	4.2	7.6	F4KI56	F4KI56	1064	IPSP	Metal-independent phosphoserine phosphatase
220948104858398	240955505371094	231223258972168	260098361968994	pollen development [GO:0009555]	plasma membrane [GO:0005886];plastid [GO:0009536]		55	0	317.84	281	2.6	2.6	3.5	3.5	F4KIH8	F4KIH8	1066	MXC17.10	Transducin/WD40 repeat-like superfamily protein
290479907989502	290502758026123	292791004180908	308799362182617		protein kinase CK2 complex [GO:0005956]	kinase activity [GO:0016301];protein kinase regulator activity [GO:0019887]	5	0	2.9571	10	5.9	5.9	5.9	5.9	F4KIZ2	F4KIZ2	1068	CKB1	Casein kinase II subunit beta
245093002319336	277927169799805	NaN	NaN	autophagosome assembly [GO:0000045];autophagy of mitochondrion [GO:0000422];autophagy of nucleus [GO:0044804];autophagy of peroxisome [GO:0030242];defense response to bacterium, incompatible interaction [GO:0009816];defense response to fungus [GO:0050832];leaf senescence [GO:0010150];protein transport [GO:0015031]	extrinsic component of membrane [GO:0019898];phagophore assembly site [GO:0000407]		9	0	7.8369	14	1.8	0.5	0	0	F8S296	F8S296	1070	ATG2	Autophagy-related protein 2
383044509887695	382285842895508	383187446594238	383225250244141	photorespiration [GO:0009853];reductive pentose-phosphate cycle [GO:0019253];response to abscisic acid [GO:0009737];response to cadmium ion [GO:0046686]	apoplast [GO:0048046];cell wall [GO:0005618];chloroplast [GO:0009507];chloroplast envelope [GO:0009941];chloroplast stroma [GO:0009570];chloroplast thylakoid membrane [GO:0009535];cytosolic ribosome [GO:0022626];plastid [GO:0009536];plastoglobule [GO:0010287];thylakoid [GO:0009579]	magnesium ion binding [GO:0000287];monooxygenase activity [GO:0004497];ribulose-bisphosphate carboxylase activity [GO:0016984]	97	0	323.31	9549	76.6	76.6	76.6	76.6	O03042;REV__Q9FRK9	O03042	1072	rbcL	Ribulose bisphosphate carboxylase large chain
262206287384033	261279582977295	262597579956055	261168003082275	defense response to fungus [GO:0050832];response to desiccation [GO:0009269];response to high light intensity [GO:0009644];response to wounding [GO:0009611]	cytosol [GO:0005829]		8	0	20.277	21	37.1	29.1	42.4	34.4	O03983	O03983	1073	LEA14	Probable desiccation-related protein LEA14
235249214172363	239420795440674	228293132781982	22504846572876	cellular response to heat [GO:0034605];protein folding [GO:0006457];protein stabilization [GO:0050821]	apoplast [GO:0048046];cell surface [GO:0009986];cell wall [GO:0005618];chloroplast stroma [GO:0009570];cytoplasm [GO:0005737];cytosol [GO:0005829];Golgi apparatus [GO:0005794];nucleus [GO:0005634];perinuclear region of cytoplasm [GO:0048471];plasma membrane [GO:0005886];plastid [GO:0009536];protein-containing complex [GO:0032991];vacuolar membrane [GO:0005774]	ATP binding [GO:0005524];unfolded protein binding [GO:0051082]	114	0	106.75	94	63.9	64.2	61.4	62.5	O03986	O03986	1074	HSP90-4	Heat shock protein 90-4
245988922119141	NaN	NaN	242348384857178	embryo sac development [GO:0009553];glucose mediated signaling pathway [GO:0010255];pollen development [GO:0009555];positive regulation of RNA polymerase II transcription preinitiation complex assembly [GO:0045899];proteasomal protein catabolic process [GO:0010498];regulation of transcription by RNA polymerase II [GO:0006357]	cytosol [GO:0005829];extracellular region [GO:0005576];nucleus [GO:0005634];plasma membrane [GO:0005886];proteasome complex [GO:0000502];proteasome regulatory particle, base subcomplex [GO:0008540];protein-containing complex [GO:0032991]	ATP binding [GO:0005524];hydrolase activity [GO:0016787]	37	0	27.211	23	5.2	2.1	2.4	1.9	O04019	O04019	1075	RPT5B	26S proteasome regulatory subunit 6A homolog B
245998020172119	261982803344727	265737934112549	266290912628174	cellular response to hypoxia [GO:0071456];protein targeting to vacuole [GO:0006623]	endoplasmic reticulum [GO:0005783];endoplasmic reticulum membrane [GO:0005789];extracellular region [GO:0005576];integral component of membrane [GO:0016021];plasma membrane [GO:0005886];protein storage vacuole [GO:0000326];protein storage vacuole membrane [GO:0032586]		10	0	27.361	33	5.2	12	10.8	19.1	O04023	O04023	1076	SRC2	Protein SRC2 homolog
24149730682373	234571361541748	237258796691895	238598442077637			phosphatase activity [GO:0016791]	5	0	24.859	15	7.1	7.1	7.1	7.1	O04035	O04035	1077	At1g08940	Phosphoglycerate mutase-like protein AT74H
295783081054688	292515563964844	2928049659729	291426544189453	response to karrikin [GO:0080167]	chloroplast [GO:0009507];chloroplast stroma [GO:0009570]	2 iron, 2 sulfur cluster binding [GO:0051537];electron transfer activity [GO:0009055];metal ion binding [GO:0046872]	4	0	99.936	46	57.4	57.4	57.4	57.4	O04090	O04090	1078	FD1	Ferredoxin-1, chloroplastic
30666446685791	308941040039063	308303203582764	308132171630859	cellular amino acid metabolic process [GO:0006520];L-serine biosynthetic process [GO:0006564]	chloroplast [GO:0009507];chloroplast stroma [GO:0009570];cytosol [GO:0005829];nucleus [GO:0005634]	NAD binding [GO:0051287];phosphoglycerate dehydrogenase activity [GO:0004617]	46	0	323.31	523	51.4	47.8	52.4	46.8	O04130	O04130	1079	PGDH2	D-3-phosphoglycerate dehydrogenase 2, chloroplastic
272885055541992	270096664428711	273981952667236	269864177703857	cyclic nucleotide metabolic process [GO:0009187];tRNA splicing, via endonucleolytic cleavage and ligation [GO:0006388]	cytoplasm [GO:0005737];cytosol [GO:0005829]	2',3'-cyclic-nucleotide 3'-phosphodiesterase activity [GO:0004113]	12	0	63.714	73	53.6	42.5	43.6	35.4	O04147	O04147	1080	At4g18930	Cyclic phosphodiesterase
313296165466309	312694129943848	31346305847168	313406944274902	endoplasmic reticulum unfolded protein response [GO:0030968];protein folding [GO:0006457];response to cadmium ion [GO:0046686];response to endoplasmic reticulum stress [GO:0034976];response to oxidative stress [GO:0006979]	endoplasmic reticulum [GO:0005783];endoplasmic reticulum lumen [GO:0005788];endoplasmic reticulum membrane [GO:0005789];mitochondrion [GO:0005739];nucleus [GO:0005634];plasmodesma [GO:0009506];secretory vesicle [GO:0099503];vacuolar membrane [GO:0005774]	calcium ion binding [GO:0005509];carbohydrate binding [GO:0030246];unfolded protein binding [GO:0051082]	60	0	323.31	612	70.6	64.5	75.8	68.5	O04151	O04151	1081	CRT1	Calreticulin-1
320298957824707	319152393341064	319012794494629	318380451202393	anthocyanin-containing compound metabolic process [GO:0046283];defense response to bacterium [GO:0042742];endoplasmic reticulum unfolded protein response [GO:0030968];innate immune response-activating signal transduction [GO:0002758];plant-type hypersensitive response [GO:0009626];protein folding [GO:0006457]	endoplasmic reticulum [GO:0005783];endoplasmic reticulum lumen [GO:0005788];endoplasmic reticulum membrane [GO:0005789];extracellular region [GO:0005576]	calcium ion binding [GO:0005509];carbohydrate binding [GO:0030246];unfolded protein binding [GO:0051082]	46	0	323.31	499	64.9	68.6	64.9	65.8	O04153	O04153	1082	CRT3	Calreticulin-3
296222476959229	295615081787109	297888965606689	298913097381592	amylopectin biosynthetic process [GO:0010021];starch biosynthetic process [GO:0019252];starch catabolic process [GO:0005983]	chloroplast [GO:0009507];chloroplast isoamylase complex [GO:0010368]	isoamylase activity [GO:0019156]	17	0	45.334	81	22.3	15.1	16.6	16.6	O04196	O04196	1084	ISA1	Isoamylase 1, chloroplastic
27715482711792	277704582214355	278025493621826	279653224945068	anther dehiscence [GO:0009901];defense response [GO:0006952];defense response to bacterium [GO:0042742];defense response to fungus [GO:0050832];extracellular ATP signaling [GO:0106167];jasmonic acid and ethylene-dependent systemic resistance [GO:0009861];jasmonic acid mediated signaling pathway [GO:0009867];negative regulation of defense response [GO:0031348];protein ubiquitination [GO:0016567];r…			12	0	20.518	56	12	11.5	12.5	16	O04197	O04197	1085	COI1	Coronatine-insensitive protein 1
220946159362793	210686130523682	283557357788086	280665073394775	embryo development ending in seed dormancy [GO:0009793];formation of cytoplasmic translation initiation complex [GO:0001732];pollen germination [GO:0009846];response to sucrose [GO:0009744];translational initiation [GO:0006413]	cytoplasm [GO:0005737];cytosol [GO:0005829];eukaryotic 43S preinitiation complex [GO:0016282];eukaryotic 48S preinitiation complex [GO:0033290];eukaryotic translation initiation factor 3 complex, eIF3m [GO:0071541];Golgi apparatus [GO:0005794];nucleus [GO:0005634]	translation initiation factor activity [GO:0003743];translation initiation factor binding [GO:0031369]	18	0	323.31	175	11.9	15.7	9.6	9.6	O04202	O04202	1086	TIF3F1	Eukaryotic translation initiation factor 3 subunit F
NaN	24481237411499	NaN	250272827148438	clathrin coat assembly [GO:0048268];clathrin-dependent endocytosis [GO:0072583];intracellular protein transport [GO:0006886]	cell plate [GO:0009504];chloroplast envelope [GO:0009941];clathrin coat of coated pit [GO:0030132];clathrin coat of trans-Golgi network vesicle [GO:0030130];clathrin vesicle coat [GO:0030125];cytoskeleton [GO:0005856];Golgi apparatus [GO:0005794];phragmoplast [GO:0009524];plasma membrane [GO:0005886]	clathrin heavy chain binding [GO:0032050];identical protein binding [GO:0042802];structural molecule activity [GO:0005198]	17	0	61.75	61	0	3.1	0	2.7	O04209	O04209	1087	CLC2	Clathrin light chain 2
253745460510254	255748481750488	264814529418945	262447776794434	defense response [GO:0006952];NLS-bearing protein import into nucleus [GO:0006607]	cytosol [GO:0005829];host cell nucleus [GO:0042025];nucleus [GO:0005634]	nuclear import signal receptor activity [GO:0061608];nuclear localization sequence binding [GO:0008139]	23	0	80.634	66	11.9	15.4	19.2	11.1	O04294	O04294	1089	IMPA3	Importin subunit alpha-3
315439300537109	315630645751953	315682392120361	315645637512207	response to cold [GO:0009409];response to jasmonic acid [GO:0009753];response to wounding [GO:0009611];vegetative to reproductive phase transition of meristem [GO:0010228]	chloroplast [GO:0009507];cytosol [GO:0005829];nucleus [GO:0005634];plasmodesma [GO:0009506];vacuole [GO:0005773]	carbohydrate binding [GO:0030246]	44	0	323.31	657	86.3	81.8	93.8	95.3	O04309	O04309	1091	JAL35	Jacalin-related lectin 35
274365863800049	267445793151855	267823181152344	272318744659424	response to cold [GO:0009409]	cytosol [GO:0005829];nucleus [GO:0005634];plasmodesma [GO:0009506]	carbohydrate binding [GO:0030246];copper ion binding [GO:0005507]	54	0	323.31	593	19.9	15	15.3	22.7	O04310	O04310	1092	JAL34	Jacalin-related lectin 34
NaN	230802745819092	237396450042725	213497047424316	response to cold [GO:0009409];response to zinc ion [GO:0010043]	nucleus [GO:0005634];plasmodesma [GO:0009506]	carbohydrate binding [GO:0030246]	40	0	323.31	407	0	4.3	2.3	13.7	O04311	O04311	1093	JAL33	Jacalin-related lectin 33
283295001983643	272843627929688	261292381286621	284493961334229		cytosol [GO:0005829]	carbohydrate binding [GO:0030246];copper ion binding [GO:0005507]	30	0	279.61	138	3.4	10.8	21.6	3	O04313	O04313	1094	PBP2	PYK10-binding protein 2
281832408905029	27961353302002	278016242980957	280749015808105	protein folding [GO:0006457];regulation of hydrolase activity [GO:0051336]	cytosol [GO:0005829];nucleus [GO:0005634];plasmodesma [GO:0009506]	carbohydrate binding [GO:0030246];copper ion binding [GO:0005507];enzyme regulator activity [GO:0030234]	44	0	323.31	759	47	50.7	60.7	43.3	O04314	O04314	1095	PBP1	PYK10-binding protein 1
312307758331299	312434864044189	311987056732178	311041202545166	glucosinolate catabolic process [GO:0019762];nitrile biosynthetic process [GO:0080028]	cytosol [GO:0005829];nucleus [GO:0005634];plasmodesma [GO:0009506]	carbohydrate binding [GO:0030246];enzyme regulator activity [GO:0030234]	68	0	323.31	981	26.2	31.8	33.8	29.9	O04316	O04316	1096	NSP4	Nitrile-specifier protein 4
279006385803223	28530403137207	290963497161865	296560649871826	glucosinolate catabolic process [GO:0019762];nitrile biosynthetic process [GO:0080028]	chloroplast [GO:0009507];cytosol [GO:0005829];nucleus [GO:0005634]	carbohydrate binding [GO:0030246];enzyme regulator activity [GO:0030234]	31	0	277.51	125	12	12	12	12	O04318	O04318	1097	NSP3	Nitrile-specifier protein 3
286613254547119	288980159759521	288020877838135	290162448883057	auxin metabolic process [GO:0009850];response to wounding [GO:0009611]	endoplasmic reticulum [GO:0005783];endoplasmic reticulum lumen [GO:0005788];nucleus [GO:0005634];plasma membrane [GO:0005886]	hydrolase activity [GO:0016787];IAA-Ala conjugate hydrolase activity [GO:0010179];metal ion binding [GO:0046872]	28	0	312.95	277	35.2	28.6	34.3	37.5	O04373	O04373	1098	ILL4	IAA-amino acid hydrolase ILR1-like 4
264811916351318	264355850219727	267570991516113	264531536102295	brassinosteroid mediated signaling pathway [GO:0009742];megasporogenesis [GO:0009554];meiotic sister chromatid cohesion [GO:0051177];microsporogenesis [GO:0009556];protein dephosphorylation [GO:0006470];regulation of protein autophosphorylation [GO:0031952]	cytoplasm [GO:0005737];cytosol [GO:0005829];nucleus [GO:0005634];protein phosphatase type 2A complex [GO:0000159]	protein phosphatase activator activity [GO:0072542]	11	0	11.399	56	9.6	11.2	11	13.6	O04376	O04376	1099	B'BETA	Serine/threonine protein phosphatase 2A 57 kDa regulatory subunit B' beta isoform
294347591400146	294451389312744	294540119171143	29496955871582	adaxial/abaxial pattern specification [GO:0009955];adventitious root development [GO:0048830];auxin metabolic process [GO:0009850];cell differentiation [GO:0030154];defense response to virus [GO:0051607];gene silencing by miRNA [GO:0035195];innate immune response [GO:0045087];leaf morphogenesis [GO:0009965];leaf proximal/distal pattern formation [GO:0010589];leaf vascular tissue pattern formation…	cytoplasm [GO:0005737];cytosol [GO:0005829];nucleus [GO:0005634]	endoribonuclease activity [GO:0004521];metal ion binding [GO:0046872];miRNA binding [GO:0035198];mRNA binding [GO:0003729]	37	0	111.99	279	25.2	27.5	26.2	21.1	O04379	O04379	1100	2001-08-01	Protein argonaute 1
287640781402588	2881298828125	289317665100098	288409824371338	peroxisome organization [GO:0007031];purine nucleobase metabolic process [GO:0006144];urate catabolic process [GO:0019628]	cytosol [GO:0005829];peroxisome [GO:0005777]	urate oxidase activity [GO:0004846]	29	0	211.36	266	49.2	53.4	55.7	51.5	O04420	O04420	1101	At2g26230	Uricase
297669239044189	298695755004883	297362155914307	297875728607178	protein folding [GO:0006457]	chaperonin-containing T-complex [GO:0005832];cytosol [GO:0005829];nucleus [GO:0005634];plasma membrane [GO:0005886];plasmodesma [GO:0009506]	ATP binding [GO:0005524];unfolded protein binding [GO:0051082]	60	0	323.31	473	44.7	30.5	40.6	32.1	O04450	O04450	1103	CCT5	T-complex protein 1 subunit epsilon
265859184265137	265132064819336	265090274810791	26453592300415	protein deubiquitination [GO:0016579];shoot system morphogenesis [GO:0010016];ubiquitin-dependent protein catabolic process [GO:0006511]	cytoplasm [GO:0005737];nucleus [GO:0005634]	thiol-dependent ubiquitin-specific protease activity [GO:0004843]	12	0	16.07	80	10	12.7	10	14.8	O04482	O04482	1104	UCH2	Ubiquitin carboxyl-terminal hydrolase 2
3240087890625	324088706970215	324487228393555	324866600036621		cytosol [GO:0005829];extracellular region [GO:0005576];plasma membrane [GO:0005886];plasmodesma [GO:0009506];vacuole [GO:0005773]	translation elongation factor activity [GO:0003746]	55	0	323.31	880	68.6	68.6	68.4	68.6	O04487	O04487	1106	At1g09640	Probable elongation factor 1-gamma 1
NaN	242750473022461	237371711730957	240990867614746	leaf proximal/distal pattern formation [GO:0010589];leaf vascular tissue pattern formation [GO:0010305];mRNA cleavage involved in gene silencing by miRNA [GO:0035279];pre-miRNA processing [GO:0031054];primary miRNA processing [GO:0031053];production of miRNAs involved in gene silencing by miRNA [GO:0035196];production of siRNA involved in RNA interference [GO:0030422];production of ta-siRNAs invo…	nuclear dicing body [GO:0010445];nuclear speck [GO:0016607];nucleus [GO:0005634]	double-stranded RNA binding [GO:0003725];identical protein binding [GO:0042802];miRNA binding [GO:0035198];ribonuclease III activity [GO:0004525]	2	0	5.1712	10	0	2.9	13.1	16	O04492	O04492	1107	DRB1	Double-stranded RNA-binding protein 1
337761764526367	337965278625488	337758827209473	337773513793945	protein catabolic process [GO:0030163];proteolysis [GO:0006508];regulation of programmed cell death [GO:0043067];systemic acquired resistance [GO:0009627]	apoplast [GO:0048046];cell wall [GO:0005618];secretory vesicle [GO:0099503]	aspartic-type endopeptidase activity [GO:0004190];nucleotide binding [GO:0000166]	20	0	323.31	481	36.3	30.7	30.7	30.7	O04496	O04496	1108	AED3	Aspartyl protease AED3
341631660461426	340664749145508	341585083007813	34100944519043	cellular carbohydrate metabolic process [GO:0044262];glucose catabolic process [GO:0006007];glycolytic process [GO:0006096];pollen development [GO:0009555];response to cadmium ion [GO:0046686];response to cold [GO:0009409];stomatal movement [GO:0010118]	chloroplast [GO:0009507];cytosol [GO:0005829];extracellular region [GO:0005576];mitochondrial envelope [GO:0005740];plasma membrane [GO:0005886];plasmodesma [GO:0009506]	2,3-bisphosphoglycerate-independent phosphoglycerate mutase activity [GO:0046537];manganese ion binding [GO:0030145]	86	0	323.31	2488	97.5	97.5	97.5	94.6	O04499	O04499	1109	PGM1	2,3-bisphosphoglycerate-independent phosphoglycerate mutase 1
277502155303955	27852933883667	276005249023438	279129066467285		cytosol [GO:0005829]		12	0	37.106	64	31.5	26.6	36.7	36.7	O04551	O04551	1111	At1g27020	Plant/protein
276413421630859	278282642364502	277108936309814	27705696105957		Golgi apparatus [GO:0005794];integral component of membrane [GO:0016021]	O-acetyltransferase activity [GO:0016413]	12	0	61.226	65	21.5	14.7	19.5	19.2	O04621	O04621	1113	TBL26	Protein trichome birefringence-like 26
311239852905273	312022151947021	312430896759033	311978874206543	threonyl-tRNA aminoacylation [GO:0006435];tRNA aminoacylation for protein translation [GO:0006418]	cell wall [GO:0005618];chloroplast [GO:0009507];cytosol [GO:0005829];mitochondrion [GO:0005739];plasma membrane [GO:0005886];plastid [GO:0009536]	aminoacyl-tRNA ligase activity [GO:0004812];ATP binding [GO:0005524];metal ion binding [GO:0046872];threonine-tRNA ligase activity [GO:0004829]	82	0	323.31	813	69.1	65.2	67.8	62.1	O04630	O04630	1114	THRRS	Threonine--tRNA ligase, mitochondrial 1
271190204620361	269922637939453	273486614227295	273723545074463	negative regulation of defense response to virus [GO:0050687];response to virus [GO:0009615]	cytoplasm [GO:0005737];cytosol [GO:0005829];eukaryotic translation initiation factor 4F complex [GO:0016281];mRNA cap binding complex [GO:0005845];nucleus [GO:0005634];plastid [GO:0009536]	RNA 7-methylguanosine cap binding [GO:0000340];translation initiation factor activity [GO:0003743]	13	0	30.516	83	38.9	41.9	42.9	31.8	O04663	O04663	1116	EIF(ISO)4E	Eukaryotic translation initiation factor isoform 4E
274751415252686	276587409973145	27618278503418	278759002685547	one-carbon metabolic process [GO:0006730]	chloroplast stroma [GO:0009570];endoplasmic reticulum [GO:0005783]	carbonate dehydratase activity [GO:0004089];hydro-lyase activity [GO:0016836];zinc ion binding [GO:0008270]	9	0	18.158	50	14.1	15.1	19	14.8	O04846	O04846	1118	ACA1	Alpha carbonic anhydrase 1, chloroplastic
303997859954834	303854560852051	305333385467529	304309158325195	'de novo' pyrimidine nucleobase biosynthetic process [GO:0006207];'de novo' UMP biosynthetic process [GO:0044205];pyrimidine nucleotide biosynthetic process [GO:0006221]	chloroplast [GO:0009507];cytoplasm [GO:0005737];cytosol [GO:0005829];mitochondrion [GO:0005739]	dihydroorotase activity [GO:0004151];metal ion binding [GO:0046872]	24	0	206.8	300	66	67.4	61.8	61.8	O04904	O04904	1119	PYR4	Dihydroorotase, mitochondrial
290230560302734	291305541992188	290009384155273	289403324127197	CDP biosynthetic process [GO:0046705];'de novo' pyrimidine nucleobase biosynthetic process [GO:0006207];purine nucleotide metabolic process [GO:0006163];pyrimidine nucleotide biosynthetic process [GO:0006221];pyrimidine ribonucleoside monophosphate metabolic process [GO:0009173];UDP biosynthetic process [GO:0006225]	cytoplasm [GO:0005737];cytosol [GO:0005829];nucleus [GO:0005634];plastid [GO:0009536]	ATP binding [GO:0005524];cytidylate kinase activity [GO:0004127];UMP kinase activity [GO:0033862];uridylate kinase activity [GO:0009041]	25	0	129.22	243	56.9	47.5	40.6	58.9	O04905	O04905	1120	UMK3	UMP-CMP kinase 3
289159297943115	289294528961182	289012145996094	286540012359619	response to oxidative stress [GO:0006979]	cytosol [GO:0005829];nucleus [GO:0005634];peroxisome [GO:0005777];plasma membrane [GO:0005886]	glutathione peroxidase activity [GO:0004602];peroxidase activity [GO:0004601]	31	0	229.77	265	66.9	79.9	78.1	55	O04922	O04922	1121	GPX2	Probable glutathione peroxidase 2
NaN	NaN	246984825134277	247986736297607	regulation of auxin polar transport [GO:2000012]	cytosol [GO:0005829];peroxisome [GO:0005777]	metal ion binding [GO:0046872];protein serine/threonine phosphatase activity [GO:0004722]	10	0	4.7036	4	18.9	19.9	20.2	17.9	O04951	O04951	1122	PP2A5	Serine/threonine-protein phosphatase PP2A-5 catalytic subunit
322745895385742	322053070068359	322214126586914	322127456665039	fatty acid biosynthetic process [GO:0006633];malonyl-CoA biosynthetic process [GO:2001295]	chloroplast [GO:0009507]	acetyl-CoA carboxylase activity [GO:0003989];ATP binding [GO:0005524];biotin carboxylase activity [GO:0004075];metal ion binding [GO:0046872]	53	0	323.31	991	72.6	70.8	70	71.1	O04983	O04983	1123	CAC2	Biotin carboxylase, chloroplastic
337535400390625	336694488525391	337905197143555	338107681274414		anchored component of membrane [GO:0031225];anchored component of plasma membrane [GO:0046658];apoplast [GO:0048046];cytosol [GO:0005829];plasma membrane [GO:0005886];secretory vesicle [GO:0099503]		33	0	323.31	811	50.2	49.5	50.2	49.5	O22126	O22126	1125	FLA8	Fasciclin-like arabinogalactan protein 8
254480247497559	250942211151123	256912574768066	2581418800354	cell wall modification [GO:0042545];defense response to Gram-negative bacterium [GO:0050829];pectin catabolic process [GO:0045490];response to bacterium [GO:0009617];response to fungus [GO:0009620]	cell wall [GO:0005618];extracellular region [GO:0005576]	aspartyl esterase activity [GO:0045330];pectinesterase activity [GO:0030599];pectinesterase inhibitor activity [GO:0046910]	26	0	323.31	183	10	6.8	9.2	9.8	O22149	O22149	1127	PME17	Probable pectinesterase/pectinesterase inhibitor 17
309347343444824	303578338623047	297321929931641	309904403686523		chloroplast [GO:0009507];chloroplast thylakoid [GO:0009534];chloroplast thylakoid lumen [GO:0009543];chloroplast thylakoid membrane [GO:0009535];cytosol [GO:0005829];thylakoid [GO:0009579];thylakoid lumen [GO:0031977]		14	0	323.31	209	59.4	59.4	59.4	59.4	O22160	O22160	1128	At2g44920	Thylakoid lumenal 15 kDa protein 1, chloroplastic
319488296508789	318735694885254	31875768661499	31963752746582	regulation of translation [GO:0006417];response to cadmium ion [GO:0046686];viral process [GO:0016032]	cytoplasm [GO:0005737];cytosol [GO:0005829];nucleus [GO:0005634];ribonucleoprotein complex [GO:1990904];vacuole [GO:0005773]	mRNA 3'-UTR binding [GO:0003730];mRNA binding [GO:0003729];poly(A) binding [GO:0008143];poly(U) RNA binding [GO:0008266];RNA binding [GO:0003723]	65	0	323.31	939	45.6	47.3	49.4	43.5	O22173	O22173	1129	PAB4	Polyadenylate-binding protein 4
257823925018311	254860649108887	254529972076416	250020008087158	protein autophosphorylation [GO:0046777]	integral component of membrane [GO:0016021];plasma membrane [GO:0005886];plasmodesma [GO:0009506];vacuole [GO:0005773]	ATP binding [GO:0005524];protein kinase activity [GO:0004672];protein serine/threonine kinase activity [GO:0004674]	5	0.00057176	2.6999	37	3.4	4.6	5.6	2.5	O22187	O22187	1130	At2g23200	Probable receptor-like protein kinase At2g23200
257262706756592	258747863769531	258324604034424	258692417144775	coumarin biosynthetic process [GO:0009805];flavonoid biosynthetic process [GO:0009813];lignin biosynthetic process [GO:0009809];phenylpropanoid biosynthetic process [GO:0009699]	cytosol [GO:0005829];endoplasmic reticulum [GO:0005783];integral component of membrane [GO:0016021];intracellular membrane-bounded organelle [GO:0043231];membrane [GO:0016020];mitochondrion [GO:0005739];plasma membrane [GO:0005886]	heme binding [GO:0020037];identical protein binding [GO:0042802];iron ion binding [GO:0005506];monooxygenase activity [GO:0004497];oxidoreductase activity, acting on paired donors, with incorporation or reduction of molecular oxygen, NAD(P)H as one donor, and incorporation of one atom of oxygen [GO:0016709];p-coumarate 3-hydroxylase activity [GO:0046409]	7	0	7.6626	40	3	3	3	3	O22203	O22203	1131	CYP98A3	Cytochrome P450 98A3
219560298919678	229839324951172	229954853057861	219759635925293	cell fate determination [GO:0001709];cell-cell signaling [GO:0007267];embryo sac development [GO:0009553];embryo sac egg cell differentiation [GO:0009560];mRNA splicing, via spliceosome [GO:0000398]	nuclear speck [GO:0016607];spliceosomal complex [GO:0005681];U4/U6 x U5 tri-snRNP complex [GO:0046540]	U4 snRNA binding [GO:0030621];U6 snRNA binding [GO:0017070]	12	0	22.902	34	2.5	5.2	5.2	2.5	O22212	O22212	1133	LIS	U4/U6 small nuclear ribonucleoprotein PRP4-like protein
243385124206543	243303298950195	247237987518311	240645561218262	carbohydrate metabolic process [GO:0005975];glycerol-3-phosphate catabolic process [GO:0046168];glycerol-3-phosphate metabolic process [GO:0006072];NADH oxidation [GO:0006116]	cytosol [GO:0005829];glycerol-3-phosphate dehydrogenase complex [GO:0009331]	glycerol-3-phosphate dehydrogenase [NAD+] activity [GO:0004367];NAD binding [GO:0051287]	9	0	13.17	37	3.7	3.7	3.7	3.7	O22216	O22216	1134	GPDHC1	Glycerol-3-phosphate dehydrogenase [NAD(+)] GPDHC1, cytosolic
325455207824707	326859130859375	326591911315918	326070175170898	cell redox homeostasis [GO:0045454];hydrogen peroxide catabolic process [GO:0042744];positive regulation of catalytic activity [GO:0043085];regulation of chlorophyll biosynthetic process [GO:0010380];regulation of starch biosynthetic process [GO:0010581];removal of superoxide radicals [GO:0019430]	chloroplast [GO:0009507];chloroplast stroma [GO:0009570];cytosol [GO:0005829]	enzyme activator activity [GO:0008047];identical protein binding [GO:0042802];oxidoreductase activity, acting on a sulfur group of donors, disulfide as acceptor [GO:0016671];thioredoxin-disulfide reductase activity [GO:0004791]	33	0	323.31	459	48.4	48.4	49.3	43.7	O22229	O22229	1136	NTRC	NADPH-dependent thioredoxin reductase 3
273396015167236	233348369598389	269616832733154	270756149291992	defense response [GO:0006952];L-phenylalanine biosynthetic process [GO:0009094];response to karrikin [GO:0080167]	chloroplast [GO:0009507];chloroplast stroma [GO:0009570];cytoplasm [GO:0005737]	arogenate dehydratase activity [GO:0047769];prephenate dehydratase activity [GO:0004664]	14	0	160.12	39	12	9.2	9.9	4.5	O22241	O22241	1137	ADT4	Arogenate dehydratase 4, chloroplastic
32078010559082	320503158569336	320341987609863	320956916809082	cell redox homeostasis [GO:0045454];double fertilization forming a zygote and endosperm [GO:0009567];embryo development ending in seed dormancy [GO:0009793];embryo sac development [GO:0009553];pollen tube development [GO:0048868];response to cadmium ion [GO:0046686];response to endoplasmic reticulum stress [GO:0034976]	cytosol [GO:0005829];endoplasmic reticulum [GO:0005783];plant-type cell wall [GO:0009505];secretory vesicle [GO:0099503];vacuolar membrane [GO:0005774]	protein disulfide isomerase activity [GO:0003756]	57	0	323.31	829	85.3	82.8	85.6	86.1	O22263	O22263	1138	PDIL2-1	Protein disulfide-isomerase like 2-1
290316791534424	278198852539063	280750541687012	288754024505615	protein heterotrimerization [GO:0070208];protein import into chloroplast thylakoid membrane [GO:0045038];response to high light intensity [GO:0009644]	chloroplast [GO:0009507];chloroplast envelope [GO:0009941];chloroplast stroma [GO:0009570];chloroplast thylakoid membrane [GO:0009535];cytosol [GO:0005829];protein-containing complex [GO:0032991];signal recognition particle, chloroplast targeting [GO:0080085];signal recognition particle, endoplasmic reticulum targeting [GO:0005786]	disordered domain specific binding [GO:0097718];identical protein binding [GO:0042802];metal ion binding [GO:0046872];protein domain specific binding [GO:0019904];protein-macromolecule adaptor activity [GO:0030674]	12	0	27.03	89	18	15.5	22	25.7	O22265	O22265	1139	CAO	Signal recognition particle 43 kDa protein, chloroplastic
304240226745605	303442440032959	304015159606934	303051948547363	cellulose biosynthetic process [GO:0030244];defense response to bacterium [GO:0042742];GDP-mannose biosynthetic process [GO:0009298];L-ascorbic acid biosynthetic process [GO:0019853];response to ammonium ion [GO:0060359];response to heat [GO:0009408];response to jasmonic acid [GO:0009753];response to ozone [GO:0010193];response to salt stress [GO:0009651]	cytosol [GO:0005829];nucleus [GO:0005634]	GTP binding [GO:0005525];mannose-1-phosphate guanylyltransferase activity [GO:0004475]	34	0	179.85	336	44	46.8	45.2	37.1	O22287	O22287	1141	CYT1	Mannose-1-phosphate guanylyltransferase 1
255351943969727	231300468444824	NaN	235969619750977	mRNA cis splicing, via spliceosome [GO:0045292];regulation of alternative mRNA splicing, via spliceosome [GO:0000381]	interchromatin granule [GO:0035061];nuclear speck [GO:0016607];nucleus [GO:0005634];spliceosomal complex [GO:0005681]	mRNA binding [GO:0003729];RNA binding [GO:0003723]	18	0	45.224	77	2.6	3	0	3	O22315	O22315	1142	SR34	Serine/arginine-rich-splicing factor SR34
272230625152588	268267498016357	270313892364502	257926063537598	DNA replication [GO:0006260];embryo development ending in seed dormancy [GO:0009793];flower development [GO:0009908];heterochromatin assembly [GO:0031507];heterochromatin organization [GO:0070828];leaf development [GO:0048366];multicellular organism development [GO:0007275];pollen development [GO:0009555];positive regulation of cell cycle [GO:0045787];regulation of flower development [GO:0009909]…	chromatin silencing complex [GO:0005677];Cul4-RING E3 ubiquitin ligase complex [GO:0080008];nucleus [GO:0005634]		16	0	39.428	103	28.5	16.3	19.3	7.8	O22467	O22467	1144	MSI1	Histone-binding protein MSI1
278871612548828	280468196868896	281554260253906	279268264770508	chromatin organization [GO:0006325]	Cul4-RING E3 ubiquitin ligase complex [GO:0080008];cytosol [GO:0005829];nucleus [GO:0005634]		14	0	41.851	138	23.4	21.9	25.1	23.9	O22468	O22468	1145	MSI2	WD-40 repeat-containing protein MSI2
275510540008545	27690258026123	282170639038086	288356018066406	anther wall tapetum cell differentiation [GO:0048657];brassinosteroid homeostasis [GO:0010268];brassinosteroid mediated signaling pathway [GO:0009742];detection of brassinosteroid stimulus [GO:0009729];hormone-mediated signaling pathway [GO:0009755];leaf development [GO:0048366];microtubule bundle formation [GO:0001578];negative regulation of cell death [GO:0060548];pollen exine formation [GO:001…	endosome [GO:0005768];endosome membrane [GO:0010008];integral component of membrane [GO:0016021];plasma membrane [GO:0005886]	ATP binding [GO:0005524];identical protein binding [GO:0042802];protein heterodimerization activity [GO:0046982];protein homodimerization activity [GO:0042803];protein kinase activity [GO:0004672];protein serine/threonine kinase activity [GO:0004674];steroid binding [GO:0005496];transmembrane receptor protein tyrosine kinase activity [GO:0004714]	4	0.0018549	2.2324	21	1.9	3	1.8	2.5	O22476	O22476	1147	BRI1	Protein BRASSINOSTEROID INSENSITIVE 1
263358421325684	263919010162354	25909740447998	260814990997314	chloroplast organization [GO:0009658]	cytosol [GO:0005829]	ATP binding [GO:0005524];protein kinase activity [GO:0004672];protein serine/threonine kinase activity [GO:0004674];protein serine/threonine/tyrosine kinase activity [GO:0004712]	17	0	34.219	87	13.2	8.1	5.5	13.2	O22558	O22558	1148	STY8	Serine/threonine-protein kinase STY8
313078022003174	313530540466309	313816967010498	314547882080078	cell differentiation [GO:0030154];chromatin organization [GO:0006325];DNA repair [GO:0006281];flower development [GO:0009908];response to UV-B [GO:0010224]	Cul4-RING E3 ubiquitin ligase complex [GO:0080008];cytoplasm [GO:0005737];cytosol [GO:0005829];mitochondrion [GO:0005739];nucleolus [GO:0005730];nucleus [GO:0005634]	metal ion binding [GO:0046872]	41	0	323.31	650	54.2	57.4	60.7	65.3	O22607	O22607	1149	MSI4	WD-40 repeat-containing protein MSI4
287643013000488	288432292938232	287223739624023	288508491516113	photosystem II repair [GO:0010206];protein catabolic process [GO:0030163]	chloroplast [GO:0009507];chloroplast thylakoid [GO:0009534];chloroplast thylakoid membrane [GO:0009535];cytosol [GO:0005829];nucleus [GO:0005634];thylakoid [GO:0009579];thylakoid lumen [GO:0031977]	identical protein binding [GO:0042802];serine-type endopeptidase activity [GO:0004252];serine-type peptidase activity [GO:0008236]	16	0	57.619	110	45.3	38.5	45.3	45.3	O22609	O22609	1150	DEGP1	Protease Do-like 1, chloroplastic
273145809173584	275692081451416	274518337249756	276339492797852	cysteine biosynthetic process from serine [GO:0006535];photosynthesis [GO:0015979];photosynthetic acclimation [GO:0009643];regulation of hydrogen peroxide metabolic process [GO:0010310];regulation of superoxide metabolic process [GO:0090322]	chloroplast [GO:0009507];chloroplast thylakoid lumen [GO:0009543];cytoplasm [GO:0005737];thylakoid lumen [GO:0031977]	cysteine synthase activity [GO:0004124];pyridoxal phosphate binding [GO:0030170]	12	0	45.156	90	22	20.3	18.6	20.3	O22682	O22682	1151	CS26	S-sulfo-L-cysteine synthase (O-acetyl-L-serine-dependent), chloroplastic
300174388885498	302458114624023	299357891082764	299195423126221	cyanate catabolic process [GO:0009440];response to salt stress [GO:0009651]	cytosol [GO:0005829]	cyanate hydratase activity [GO:0008824];DNA binding [GO:0003677];identical protein binding [GO:0042802]	14	0	282.35	204	63.7	70.2	67.3	51.8	O22683	O22683	1152	CYN	Cyanate hydratase
269527149200439	271500587463379	270411376953125	265784511566162		chloroplast envelope [GO:0009941];plasma membrane [GO:0005886]	oxidoreductase activity [GO:0016491]	18	0	28.035	34	26.4	33	30.1	30.4	O22707	O22707	1153	At1g60690	Probable aldo-keto reductase 3
250383777618408	241262855529785	251368827819824	NaN		mitochondrion [GO:0005739]		11	0	9.2641	22	1.8	3.5	1.8	0	O22714	O22714	1154	At1g60770	Pentatricopeptide repeat-containing protein At1g60770
25339262008667	254360942840576	256975269317627	25873872756958	intracellular protein transport [GO:0006886];vesicle-mediated transport [GO:0016192]	clathrin adaptor complex [GO:0030131];clathrin-coated vesicle membrane [GO:0030665];cytoplasmic vesicle [GO:0031410];cytosol [GO:0005829];early endosome membrane [GO:0031901];Golgi apparatus [GO:0005794];intracellular membrane-bounded organelle [GO:0043231];nucleus [GO:0005634]		28	0	186.95	174	6.1	6.1	6.1	3.3	O22715;Q9SAC9	O22715	1155	AP1M2	AP-1 complex subunit mu-2
269620151519775	266680374145508	26707935333252	270108394622803	auxin biosynthetic process [GO:0009851];tryptophan biosynthetic process [GO:0000162]	chloroplast [GO:0009507];cytoplasm [GO:0005737];cytosol [GO:0005829]	indole-3-glycerol-phosphate lyase activity [GO:0033984];tryptophan synthase activity [GO:0004834]	8	0	19.509	31	36.4	30.2	31.6	29.8	O22765	O22765	1157	TRPA1	Tryptophan synthase alpha chain
268665561676025	268952732086182	27049783706665	267192096710205	mitochondrial electron transport, NADH to ubiquinone [GO:0006120];respiratory electron transport chain [GO:0022904];response to oxidative stress [GO:0006979]	cytosol [GO:0005829];mitochondrial respiratory chain complex I [GO:0005747];mitochondrion [GO:0005739]	2 iron, 2 sulfur cluster binding [GO:0051537];NADH dehydrogenase (ubiquinone) activity [GO:0008137];zinc ion binding [GO:0008270]	9	0	34.92	94	16.9	16.9	12.2	11.8	O22769	O22769	1159	At4g02580	NADH dehydrogenase [ubiquinone] flavoprotein 2, mitochondrial
2600146484375	262690124511719	261431655883789	258978843688965	photosystem II repair [GO:0010206]	chloroplast [GO:0009507];chloroplast envelope [GO:0009941];chloroplast stroma [GO:0009570];chloroplast thylakoid [GO:0009534];chloroplast thylakoid lumen [GO:0009543];chloroplast thylakoid membrane [GO:0009535];cytosol [GO:0005829];thylakoid [GO:0009579];thylakoid lumen [GO:0031977]		3	0	17.897	27	19.9	19.9	19.9	19.9	O22773	O22773	1160	At4g02530	Thylakoid lumenal 16.5 kDa protein, chloroplastic
241761512756348	24175085067749	243225803375244	24688325881958	plasmodesmata-mediated intercellular transport [GO:0010497];transport of virus in multicellular host [GO:0046739]	integral component of membrane [GO:0016021];plasma membrane [GO:0005886];plasmodesma [GO:0009506]		2	0	15.287	5	4.6	4.6	4.6	4.6	O22784	O22784	1161	PDLP3	Plasmodesmata-located protein 3
294657344818115	292382221221924	292457656860352	291150054931641	defense response to bacterium [GO:0042742];DNA repair [GO:0006281];generation of catalytic spliceosome for first transesterification step [GO:0000349];innate immune response [GO:0045087];protein K63-linked ubiquitination [GO:0070534]	catalytic step 2 spliceosome [GO:0071013];cell wall [GO:0005618];Cul4-RING E3 ubiquitin ligase complex [GO:0080008];endoplasmic reticulum [GO:0005783];nucleus [GO:0005634];Prp19 complex [GO:0000974];U2-type catalytic step 1 spliceosome [GO:0071006]	ubiquitin protein ligase activity [GO:0061630];ubiquitin-protein transferase activity [GO:0004842]	30	0	323.31	292	33.5	33	38.1	31.4	O22785	O22785	1162	PRP19B	Pre-mRNA-processing factor 19 homolog 2
25190502166748	237138729095459	248168506622314	253527927398682	regulation of RNA metabolic process [GO:0051252]	endoplasmic reticulum [GO:0005783];nucleus [GO:0005634];ribonucleoprotein complex [GO:1990904]	mRNA binding [GO:0003729];RNA binding [GO:0003723]	11	0	68.336	67	5	5	2.2	5	O22791	O22791	1163	At2g33410	Putative RNA-binding protein
242811470031738	237951107025146	24148567199707	242677803039551	cytidine to uridine editing [GO:0016554];endonucleolytic cleavage of tetracistronic rRNA transcript (SSU-rRNA, LSU-rRNA, 4.5S-rRNA, 5S-rRNA) [GO:0002103];mitochondrial mRNA modification [GO:0080156];mRNA processing [GO:0006397];plastid organization [GO:0009657]	chloroplast [GO:0009507];endoplasmic reticulum [GO:0005783];mitochondrion [GO:0005739]	protein dimerization activity [GO:0046983];protein homodimerization activity [GO:0042803]	4	0	13.939	10	11	8.7	15.5	15.5	O22793	O22793	1164	MORF2	Multiple organellar RNA editing factor 2, chloroplastic
270038890838623	270426006317139	269864177703857	272504272460938	ceramide transport [GO:0035627];intermembrane lipid transfer [GO:0120009]	cytosol [GO:0005829];membrane [GO:0016020];plasma membrane [GO:0005886]	ceramide 1-phosphate binding [GO:1902387];ceramide 1-phosphate transfer activity [GO:1902388];lipid binding [GO:0008289]	17	0	76.951	93	22.3	32.7	36.1	30.7	O22797	O22797	1165	GLTP1	Glycolipid transfer protein 1
296731376647949	29841926574707	29612735748291	297247657775879	cellular response to hypoxia [GO:0071456];response to abscisic acid [GO:0009737];response to cadmium ion [GO:0046686];response to heat [GO:0009408];response to water deprivation [GO:0009414]		oxidoreductase activity [GO:0016491];oxidoreductase activity, acting on the CH-OH group of donors, NAD or NADP as acceptor [GO:0016616]	18	0	81.043	219	35.2	24	27.1	28.3	O22809	O22809	1166	CRL1	NAD(P)-binding Rossmann-fold superfamily protein
270905323028564	265369434356689	27107292175293	265767230987549			oxidoreductase activity [GO:0016491];oxidoreductase activity, acting on the CH-OH group of donors, NAD or NADP as acceptor [GO:0016616]	16	0	14.465	58	43.6	31.8	30.5	30.2	O22810	O22810	1167	CRL2	At2g33600
28653247833252	288012866973877	28697135925293	287515563964844	benzoate metabolic process [GO:0018874];para-aminobenzoic acid metabolic process [GO:0046482];positive regulation of seed germination [GO:0010030];salicylic acid metabolic process [GO:0009696]	cytosol [GO:0005829];intracellular membrane-bounded organelle [GO:0043231]	benzoic acid glucosyltransferase activity [GO:0052641];nicotinate-O-glucosyltransferase activity [GO:0090704];quercetin 3-O-glucosyltransferase activity [GO:0080043];quercetin 7-O-glucosyltransferase activity [GO:0080044];salicylic acid glucosyltransferase (ester-forming) activity [GO:0052639];salicylic acid glucosyltransferase (glucoside-forming) activity [GO:0052640];UDP-glucose:4-aminobenzoate…	24	0	323.31	278	31.4	26.1	29.6	26.3	O22822	O22822	1169	UGT74F2	UDP-glycosyltransferase 74F2
265384998321533	272632026672363	25918571472168	263387680053711	maturation of SSU-rRNA [GO:0030490];mRNA splicing, via spliceosome [GO:0000398]	nucleolus [GO:0005730];P-body [GO:0000932];small nucleolar ribonucleoprotein complex [GO:0005732];spliceosomal complex [GO:0005681];U4/U6 x U5 tri-snRNP complex [GO:0046540];U6 snRNP [GO:0005688]	RNA binding [GO:0003723]	6	0	10.398	42	22	22	25.3	25.3	O22823	O22823	1170	LSM6B	Sm-like protein LSM36B
NaN	220730018615723	212195129394531	208818130493164		Cul4-RING E3 ubiquitin ligase complex [GO:0080008];cytosol [GO:0005829]		16	0	100.55	102	0	7.6	3.2	3.2	O22826	O22826	1171	At2g43770	At2g43770
284135303497314	285235023498535	286800289154053	285652904510498	Mo-molybdopterin cofactor biosynthetic process [GO:0006777]	cytosol [GO:0005829];molybdopterin synthase complex [GO:0019008]	molybdopterin synthase activity [GO:0030366]	13	0	50.886	151	43.4	34.8	37.4	41.4	O22827	O22827	1172	MOCS2	Molybdopterin synthase catalytic subunit
296922225952148	298226528167725	296753940582275	295459651947021	defense response [GO:0006952];fatty acid biosynthetic process [GO:0006633];fatty acid metabolic process [GO:0006631]	chloroplast stroma [GO:0009570]	acyl-[acyl-carrier-protein] desaturase activity [GO:0045300];metal ion binding [GO:0046872];stearoyl-[acp] desaturase activity [GO:0102786];stearoyl-CoA 9-desaturase activity [GO:0004768]	25	0	121.5	189	46.1	49.1	46.9	45.4	O22832;Q84VY3	O22832	1173	FAB2	Stearoyl-[acyl-carrier-protein] 9-desaturase 7, chloroplastic
263061218261719	268061199188232	266345024108887	265336208343506	cell wall macromolecule catabolic process [GO:0016998];chitin catabolic process [GO:0006032];defense response [GO:0006952];polysaccharide catabolic process [GO:0000272]	apoplast [GO:0048046];secretory vesicle [GO:0099503]	chitin binding [GO:0008061];chitinase activity [GO:0004568]	7	0	102.35	40	18.7	19.1	15.5	20.8	O22841	O22841	1174	At2g43620	Endochitinase At2g43620
21052848815918	241761512756348	210016136169434	NaN	cell wall macromolecule catabolic process [GO:0016998];chitin catabolic process [GO:0006032];defense response [GO:0006952];polysaccharide catabolic process [GO:0000272]	plasma membrane [GO:0005886]	chitin binding [GO:0008061];chitinase activity [GO:0004568]	16	0	67.746	106	18.1	14.6	9.6	0	O22842	O22842	1175	At2g43610	Endochitinase At2g43610
274701843261719	27252233505249	271621170043945	270641460418701	plant-type cell wall organization [GO:0009664];syncytium formation [GO:0006949]	cell wall [GO:0005618];extracellular region [GO:0005576];membrane [GO:0016020]		3	0	16.361	26	12.6	12.6	12.6	16.2	O22874	O22874	1179	EXPA8	Expansin-A8
329336280822754	326742973327637	328318710327148	326968536376953	chlorophyll biosynthetic process [GO:0015995];protoporphyrinogen IX biosynthetic process [GO:0006782]	chloroplast [GO:0009507];chloroplast envelope [GO:0009941];chloroplast stroma [GO:0009570];Golgi apparatus [GO:0005794]	uroporphyrinogen decarboxylase activity [GO:0004853]	34	0	323.31	658	69	68.5	61.4	66	O22886	O22886	1180	HEME2	Uroporphyrinogen decarboxylase 2, chloroplastic
248258533477783	250731639862061	252321319580078	248246402740479	mRNA processing [GO:0006397];RNA splicing [GO:0008380]	chloroplast envelope [GO:0009941];spliceosomal complex [GO:0005681]	ATP binding [GO:0005524];RNA binding [GO:0003723];RNA helicase activity [GO:0003724]	29	0	21.472	20	12.5	7.7	10.2	4.4	O22899	O22899	1182	At2g47250	Probable pre-mRNA-splicing factor ATP-dependent RNA helicase DEAH3
270029239654541	269435787200928	270635280609131	267866859436035		nucleus [GO:0005634]	ATP binding [GO:0005524];RNA binding [GO:0003723];RNA helicase activity [GO:0003724]	13	0	12.002	59	10.4	5.1	8.4	9.5	O22907	O22907	1183	RH24	DEAD-box ATP-dependent RNA helicase 24
260960540771484	258930988311768	259923515319824	259624557495117	negative regulation of reductive pentose-phosphate cycle [GO:0080153];reductive pentose-phosphate cycle [GO:0019253];response to sucrose [GO:0009744]	chloroplast [GO:0009507];chloroplast envelope [GO:0009941];chloroplast stroma [GO:0009570];cytosol [GO:0005829];protein-containing complex [GO:0032991]	copper ion binding [GO:0005507];nickel cation binding [GO:0016151]	2	0	19.487	13	24.2	31.5	7.3	31.5	O22914	O22914	1184	CP12-1	Calvin cycle protein CP12-1, chloroplastic
265417232513428	265673084259033	269431304931641	267255935668945	cis assembly of pre-catalytic spliceosome [GO:0000354];mRNA splicing, via spliceosome [GO:0000398]	Cajal body [GO:0015030];cytoplasm [GO:0005737];nucleoplasm [GO:0005654];spliceosomal complex [GO:0005681];U2 snRNP [GO:0005686]	RNA binding [GO:0003723]	6	0	16.743	45	12.1	17.7	15.5	16.4	O22922	O22922	1185	U2B''	U2 small nuclear ribonucleoprotein B''
293983173370361	294373397827148	294275436401367	294555816650391	peptide catabolic process [GO:0043171];proteolysis involved in cellular protein catabolic process [GO:0051603]	cytosol [GO:0005829];mitochondrion [GO:0005739];peroxisome [GO:0005777]	metal ion binding [GO:0046872];metalloendopeptidase activity [GO:0004222]	57	0	286.2	413	23.8	24.1	20.1	18.9	O22941;A0A1I9LPB3	O22941	1187	PXM16	Insulin-degrading enzyme-like 1, peroxisomal
240821285247803	239834632873535	24203441619873	NaN	cellular protein modification process [GO:0006464];defense response [GO:0006952];positive regulation of camalexin biosynthetic process [GO:1901183]	cytosol [GO:0005829];nucleus [GO:0005634]	protein-N-terminal asparagine amidohydrolase activity [GO:0008418];protein-N-terminal glutamine amidohydrolase activity [GO:0070773]	3	0	3.2061	4	11.3	7.2	7.2	0	O22944	O22944	1188	NTAQ1	Protein N-terminal glutamine amidohydrolase
296637535095215	297223243713379	297575759887695	299159870147705	regulation of programmed cell death [GO:0043067]	cytosol [GO:0005829];endoplasmic reticulum [GO:0005783];nucleus [GO:0005634];plasmodesma [GO:0009506]	mRNA binding [GO:0003729];RNA binding [GO:0003723]	38	0	314.62	363	51.7	42.7	45.9	43.8	O22957	O22957	1189	At2g34040	Apoptosis inhibitory protein 5 (API5)
232509269714355	NaN	237355194091797	NaN	mitochondrial proton-transporting ATP synthase complex assembly [GO:0033615]	mitochondrion [GO:0005739]		4	0	9.1138	25	4	0	4	0	O22958	O22958	1190	At2g34050	ATP synthase F1 complex assembly factor
262427272796631	268433799743652	261582317352295	267562084197998		Golgi apparatus [GO:0005794];integral component of membrane [GO:0016021]	O-acetyltransferase activity [GO:0016413]	8	0	50.464	49	14.8	14.8	12.2	14.3	O22960	O22960	1191	TBL37	Protein trichome birefringence-like 37
252610149383545	251905765533447	250160579681396	255891513824463	rRNA processing [GO:0006364]	cytosol [GO:0005829];endoplasmic reticulum [GO:0005783];nucleus [GO:0005634]	nucleic acid binding [GO:0003676]	11	0	10.815	5	40	40	40.8	40	O22969	O22969	1192	At2g34160	Uncharacterized protein At2g34160
279364070892334	NaN	27769889831543	266250553131104		nucleus [GO:0005634]		9	0	33.53	41	12.1	0	12.1	12.1	O22978	O22978	1194	T19F6.7	T19F6.7 protein
30033805847168	296954784393311	296374092102051	296194000244141	defense response [GO:0006952]	anchored component of membrane [GO:0031225];anchored component of plasma membrane [GO:0046658];mitochondrion [GO:0005739];plasma membrane [GO:0005886];plasmodesma [GO:0009506]	chitin binding [GO:0008061]	12	0	67.24	106	28	22	22.3	28	O23006	O23006	1195	LYM2	LysM domain-containing GPI-anchored protein 2
295359554290771	295503768920898	295632362365723	294317722320557	oxidation-reduction process [GO:0055114];potassium ion transport [GO:0006813];regulation of ion transmembrane transport [GO:0034765]	extracellular region [GO:0005576];plasma membrane [GO:0005886];plasmodesma [GO:0009506]	aldo-keto reductase (NADP) activity [GO:0004033];voltage-gated ion channel activity [GO:0005244]	25	0	88.432	225	45.1	39.9	55.5	48.2	O23016	O23016	1196	KAB1	Probable voltage-gated potassium channel subunit beta
298648452758789	297973175048828	298033046722412	297050037384033	protein modification by small protein conjugation [GO:0032446];protein ufmylation [GO:0071569]	cytoplasm [GO:0005737];cytosol [GO:0005829]	ATP binding [GO:0005524];metal ion binding [GO:0046872];UFM1 activating enzyme activity [GO:0071566]	24	0	323.31	294	45.2	46.6	47.8	41.1	O23034	O23034	1197	At1g05350	Ubiquitin-like modifier-activating enzyme 5
269723510742188	266214275360107	26607666015625	266594886779785	hydrogen peroxide catabolic process [GO:0042744];hyperosmotic salinity response [GO:0042538];response to cold [GO:0009409];response to desiccation [GO:0009269];response to oxidative stress [GO:0006979]	endoplasmic reticulum [GO:0005783];extracellular region [GO:0005576];plant-type cell wall [GO:0009505];plasmodesma [GO:0009506]	heme binding [GO:0020037];metal ion binding [GO:0046872];peroxidase activity [GO:0004601]	13	0	240.17	81	15.3	30.7	19.3	23	O23044;Q43872;P0DI10	O23044	1198	PER3	Peroxidase 3
274884586334229	282222785949707	280863361358643	282752437591553	embryo development ending in seed dormancy [GO:0009793];translation [GO:0006412]	chloroplast [GO:0009507];chloroplast envelope [GO:0009941];chloroplast stroma [GO:0009570];extracellular region [GO:0005576];ribosome [GO:0005840]	rRNA binding [GO:0019843];structural constituent of ribosome [GO:0003735]	13	0	53.646	119	31.4	20.6	31.4	22	O23049	O23049	1199	RPL6	50S ribosomal protein L6, chloroplastic
25091480255127	247654209136963	248992443084717	255525360107422	regulation of cell cycle [GO:0051726]	nucleus [GO:0005634]		7	0	10.28	12	7	15.7	8.4	6.4	O23126	O23126	1200	At1g22970	At1g22970/F19G10_8
27934383392334	278899478912354	279508247375488	276072425842285	gibberellic acid homeostasis [GO:0010336];mitochondrial electron transport, cytochrome c to oxygen [GO:0006123];mitochondrial electron transport, ubiquinol to cytochrome c [GO:0006122]	cytosol [GO:0005829];mitochondrial intermembrane space [GO:0005758];mitochondrion [GO:0005739];nucleus [GO:0005634];respirasome [GO:0070469];vacuolar membrane [GO:0005774]	copper ion binding [GO:0005507];electron transfer activity [GO:0009055];heme binding [GO:0020037]	8	0	23.85	79	28.1	46.5	52.6	50	O23138	O23138	1201	CYTC-1	Cytochrome c-1
266507511138916	266510257720947	249249267578125	24880729675293	endocytosis [GO:0006897];intracellular protein transport [GO:0006886];vesicle-mediated transport [GO:0016192]	clathrin adaptor complex [GO:0030131];clathrin-coated pit [GO:0005905];cytoplasmic vesicle [GO:0031410];Golgi apparatus [GO:0005794];intracellular membrane-bounded organelle [GO:0043231]	lipid binding [GO:0008289]	25	0	52.875	71	9.1	8.4	11.6	4.6	O23140	O23140	1202	AP2M	AP-2 complex subunit mu
293467617034912	294610767364502	293490829467773	294691562652588	regulation of proton transport [GO:0010155]	cytosol [GO:0005829];endoplasmic reticulum [GO:0005783];endoplasmic reticulum membrane [GO:0005789];integral component of membrane [GO:0016021];plasma membrane [GO:0005886];plasmodesma [GO:0009506]	mRNA binding [GO:0003729]	41	0	100.32	289	29.2	23.2	28.8	31.9	O23144	O23144	1204	PPI1	Proton pump-interactor 1
27329029083252	273042602539063	272666015625	275497341156006		cytosol [GO:0005829];vacuolar membrane [GO:0005774]		17	0	116.69	91	1.2	1.2	1.2	1.2	O23167	O23167	1205	C7A10.170	At4g37190
255493087768555	250478916168213	251180286407471	248236198425293	oxidation-reduction process [GO:0055114]	plasma membrane [GO:0005886]	FMN binding [GO:0010181];NAD(P)H dehydrogenase (quinone) activity [GO:0003955]	5	0	25.462	38	5.9	5.9	5.9	17.9	O23207	O23207	1209	At4g36750	Probable NAD(P)H dehydrogenase (quinone) FQR1-like 2
254595146179199	248927745819092	236039943695068	256904582977295	defense response to bacterium [GO:0042742];mRNA splicing, via spliceosome [GO:0000398]	commitment complex [GO:0000243];nuclear speck [GO:0016607];nucleus [GO:0005634];U2AF [GO:0089701];U2-type prespliceosome [GO:0071004]	poly-pyrimidine tract binding [GO:0008187];pre-mRNA 3'-splice site binding [GO:0030628]	10	0	59.436	41	3.1	1.7	5.2	1.2	O23212	O23212	1210	U2AF65A	Splicing factor U2af large subunit A
289435787200928	287803478240967	288807830810547	28741979598999	nitrogen compound metabolic process [GO:0006807];photorespiration [GO:0009853]	mitochondrion [GO:0005739];plasma membrane [GO:0005886]	(R)-2-hydroxyglutarate dehydrogenase activity [GO:0051990];2-hydroxyglutarate dehydrogenase activity [GO:0047545];FAD binding [GO:0071949]	21	0	73.937	165	36.7	21.3	34.9	31.8	O23240	O23240	1212	D2HGDH	D-2-hydroxyglutarate dehydrogenase, mitochondrial
262601718902588	263285675048828	262831268310547	258811492919922	response to virus [GO:0009615]	cytoplasm [GO:0005737];cytoplasmic stress granule [GO:0010494];cytosol [GO:0005829];eukaryotic translation initiation factor 4F complex [GO:0016281];mRNA cap binding complex [GO:0005845];nucleolus [GO:0005730];nucleus [GO:0005634];P-body [GO:0000932]	RNA 7-methylguanosine cap binding [GO:0000340];translation initiation factor activity [GO:0003743]	7	0	10.855	43	24.7	13.2	14.9	10.2	O23252	O23252	1213	EIF4E1	Eukaryotic translation initiation factor 4E-1
328116493225098	329042091369629	328466453552246	329197387695313	cellular response to tetrahydrofolate [GO:1904482];circadian rhythm [GO:0007623];folic acid metabolic process [GO:0046655];glycine biosynthetic process from serine [GO:0019264];glycine metabolic process [GO:0006544];L-serine catabolic process [GO:0006565];one-carbon metabolic process [GO:0006730];response to cadmium ion [GO:0046686];tetrahydrofolate interconversion [GO:0035999];tetrahydrofolate m…	cytosol [GO:0005829];plasma membrane [GO:0005886];plasmodesma [GO:0009506]	amino acid binding [GO:0016597];cobalt ion binding [GO:0050897];glycine hydroxymethyltransferase activity [GO:0004372];pyridoxal phosphate binding [GO:0030170];serine binding [GO:0070905];zinc ion binding [GO:0008270]	68	0	323.31	1350	80.3	84.9	93.4	72.2	O23254	O23254	1214	SHM4	Serine hydroxymethyltransferase 4
348293685913086	347815093994141	347709693908691	347272033691406	DNA methylation-dependent heterochromatin assembly [GO:0006346];embryo development ending in seed dormancy [GO:0009793];one-carbon metabolic process [GO:0006730];posttranscriptional gene silencing [GO:0016441];S-adenosylmethionine cycle [GO:0033353]	cytosol [GO:0005829];plasma membrane [GO:0005886];plasmodesma [GO:0009506];vacuolar membrane [GO:0005774];vacuole [GO:0005773]	adenosylhomocysteinase activity [GO:0004013];copper ion binding [GO:0005507]	71	0	323.31	2264	77.3	77.3	77.3	82.7	O23255	O23255	1215	SAHH1	Adenosylhomocysteinase 1
316705055236816	316710968017578	316881256103516	316024017333984	cellular response to selenium ion [GO:0071291];response to cadmium ion [GO:0046686];response to hydrogen peroxide [GO:0042542];sulfate assimilation [GO:0000103]	cytosol [GO:0005829];plasmodesma [GO:0009506]	selenium binding [GO:0008430]	47	0	323.31	642	69.8	61.2	67.6	65.9	O23264	O23264	1216	SBP1	Selenium-binding protein 1
245576572418213	247817687988281	245502777099609	244480876922607	defense response [GO:0006952]	cytosol [GO:0005829]		19	0	68.416	81	24.5	24.5	24.5	24.5	O23267	O23267	1217	dl3070w	AT4g14060/dl3070w
18617696762085	183451633453369	18679651260376	182686519622803	translation [GO:0006412]	cytosol [GO:0005829];cytosolic large ribosomal subunit [GO:0022625]	structural constituent of ribosome [GO:0003735]	20	0	74.046	120	8.6	8.6	24.8	8.6	O23290	O23290	1218	RPL36AA	60S ribosomal protein L36a
248255615234375	250534534454346	25294319152832	247412395477295	fatty acid beta-oxidation [GO:0006635];fatty acid catabolic process [GO:0009062];indolebutyric acid metabolic process [GO:0080024];response to indolebutyric acid [GO:0080026];root hair elongation [GO:0048767]	peroxisome [GO:0005777]	dodecenoyl-CoA delta-isomerase activity [GO:0004165];enoyl-CoA hydratase activity [GO:0004300]	6	0	4.419	23	4.6	4.6	4.6	4.6	O23299	O23299	1219	ECI2	Enoyl-CoA delta isomerase 2, peroxisomal
274090023040771	273639430999756	279765644073486	279943695068359	positive regulation of transcription, DNA-templated [GO:0045893]	cytosol [GO:0005829];nucleus [GO:0005634]	DNA-binding transcription factor activity [GO:0003700];protein heterodimerization activity [GO:0046982];sequence-specific DNA binding [GO:0043565]	7	0	11.64	46	26.7	28.6	28.6	28.6	O23310	O23310	1221	NFYB3	Nuclear transcription factor Y subunit B-3
262104091644287	265341701507568	26190860748291	266593532562256	response to high light intensity [GO:0009644]	chloroplast [GO:0009507]	2 iron, 2 sulfur cluster binding [GO:0051537];electron transfer activity [GO:0009055];metal ion binding [GO:0046872]	4	0	95.109	12	20.8	33.8	26	33.8	O23344	O23344	1222	FDC1	Ferredoxin C 1, chloroplastic
25342960357666	257817935943604	256482582092285	256497116088867	carotenoid biosynthetic process [GO:0016117];oxidation-reduction process [GO:0055114]	chloroplast [GO:0009507];chloroplast envelope [GO:0009941];chloroplast membrane [GO:0031969];chloroplast stroma [GO:0009570];cytosol [GO:0005829]	heme binding [GO:0020037];iron ion binding [GO:0005506];monooxygenase activity [GO:0004497];oxidoreductase activity, acting on paired donors, with incorporation or reduction of molecular oxygen [GO:0016705]	7	0	6.6711	12	4.7	9	8.4	6.9	O23365	O23365	1223	CYP97B3	Cytochrome P450 97B3, chloroplastic
300924491882324	296812210083008	295821170806885	NaN			transferase activity, transferring acyl groups other than amino-acyl groups [GO:0016747]	41	0	323.31	353	2.7	2.7	2.7	0	O23392	O23392	1224	dl3740c	HSR201-like protein
234678707122803	NaN	NaN	245050640106201	brassinosteroid homeostasis [GO:0010268];brassinosteroid mediated signaling pathway [GO:0009742];brassinosteroid metabolic process [GO:0016131];regulation of brassinosteroid biosynthetic process [GO:0010422];regulation of flavonoid biosynthetic process [GO:0009962];response to absence of light [GO:0009646];response to brassinosteroid [GO:0009741]	cytosol [GO:0005829]	transferase activity, transferring acyl groups other than amino-acyl groups [GO:0016747]	10	0	17.056	41	3.7	0	0	3.7	O23393	O23393	1225	BIA1	BAHD acyltransferase BIA1
273158779144287	273396015167236	272771072387695	275498809814453		intracellular membrane-bounded organelle [GO:0043231]	cinnamate beta-D-glucosyltransferase activity [GO:0050412];quercetin 3-O-glucosyltransferase activity [GO:0080043];quercetin 7-O-glucosyltransferase activity [GO:0080044];sinapate 1-glucosyltransferase activity [GO:0050284];UDP-glycosyltransferase activity [GO:0008194]	9	0	10.855	60	13.4	18.8	14.6	21.7	O23401	O23401	1226	UGT84A3	UDP-glycosyltransferase 84A3
255438919067383	255087261199951	247494468688965	249696102142334		intracellular membrane-bounded organelle [GO:0043231]	cinnamate beta-D-glucosyltransferase activity [GO:0050412];quercetin 3-O-glucosyltransferase activity [GO:0080043];quercetin 7-O-glucosyltransferase activity [GO:0080044];sinapate 1-glucosyltransferase activity [GO:0050284];UDP-glycosyltransferase activity [GO:0008194]	11	0	57.879	69	10.1	3.2	4.6	4.6	O23402	O23402	1227	UGT84A4	UDP-glycosyltransferase 84A4
302729759216309	30255973815918	30251916885376	297597522735596	photosystem I assembly [GO:0048564]	chloroplast [GO:0009507];chloroplast stroma [GO:0009570];chloroplast thylakoid lumen [GO:0009543];chloroplast thylakoid membrane [GO:0009535];extrinsic component of membrane [GO:0019898];photosystem II oxygen evolving complex [GO:0009654];thylakoid [GO:0009579];thylakoid lumen [GO:0031977]	calcium ion binding [GO:0005509]	17	0	89.298	115	42.9	43.2	42.9	50.9	O23403	O23403	1228	PPD1	PsbP domain-containing protein 1, chloroplastic
345973472595215	344661140441895	345761566162109	344193458557129	photosynthesis [GO:0015979];pyruvate metabolic process [GO:0006090]	chloroplast [GO:0009507];chloroplast stroma [GO:0009570];cytosol [GO:0005829];nucleus [GO:0005634]	ATP binding [GO:0005524];kinase activity [GO:0016301];metal ion binding [GO:0046872];pyruvate, phosphate dikinase activity [GO:0050242]	114	0	323.31	1763	81.5	77.4	77.1	66.1	O23404	O23404	1229	PPDK	Pyruvate, phosphate dikinase 1, chloroplastic
276558094024658	276491069793701	276550598144531	27055793762207	response to toxic substance [GO:0009636]	intracellular membrane-bounded organelle [GO:0043231]	quercetin 3-O-glucosyltransferase activity [GO:0080043];quercetin 7-O-glucosyltransferase activity [GO:0080044];UDP-glycosyltransferase activity [GO:0008194]	22	0	170.24	165	16.7	15.6	21.7	25.5	O23406	O23406	1230	UGT75D1	UDP-glycosyltransferase 75D1
NaN	NaN	24169132232666	211617107391357	galactose metabolic process [GO:0006012]	cytosol [GO:0005829];integral component of membrane [GO:0016021];plasmodesma [GO:0009506]	ATP binding [GO:0005524];galactose binding [GO:0005534];L-arabinokinase activity [GO:0009702]	40	0	235.05	174	0.8	0.8	4.3	1.5	O23461	O23461	1231	ARA1	L-arabinokinase
24881196975708	249450302124023	260996685028076	NaN	chlorophyll a catabolic process [GO:0033310];demethylation [GO:0070988];jasmonic acid metabolic process [GO:0009694];leaf senescence [GO:0010150];salicylic acid metabolic process [GO:0009696]	cytosol [GO:0005829]	carboxylic ester hydrolase activity [GO:0052689];hydrolase activity [GO:0016787];hydrolase activity, acting on ester bonds [GO:0016788];methyl indole-3-acetate esterase activity [GO:0080030];methyl jasmonate esterase activity [GO:0080032];methyl salicylate esterase activity [GO:0080031];pheophoridase activity [GO:0035560];protein homodimerization activity [GO:0042803]	6	0	5.2085	7	3.1	5.7	7.3	0	O23512	O23512	1233	PPD	Probable pheophorbidase
243203773498535	245695838928223	243643951416016	NaN	sexual reproduction [GO:0019953]	extracellular region [GO:0005576]		3	0	5.3123	12	9.2	9.2	5.2	0	O23547	O23547	1235	EXLB1	Expansin-like B1
326293830871582	319598197937012	326781883239746	314344501495361	maltose biosynthetic process [GO:0000024];response to cold [GO:0009409];starch catabolic process [GO:0005983]	chloroplast stroma [GO:0009570];cytosol [GO:0005829]	amylopectin maltohydrolase activity [GO:0102229];beta-amylase activity [GO:0016161]	51	0	323.31	421	69.7	65.7	76.1	71	O23553	O23553	1236	BAM3	Beta-amylase 3, chloroplastic
289222106933594	288946380615234	286498966217041	287051696777344	carbohydrate metabolic process [GO:0005975];carboxylic acid metabolic process [GO:0019752];response to abscisic acid [GO:0009737]	cytosol [GO:0005829];plasma membrane [GO:0005886]	L-lactate dehydrogenase activity [GO:0004459]	17	0	61.23	177	31.4	30	35.7	33.7	O23569	O23569	1237	dl4665w	L-lactate dehydrogenase
295960865020752	29696870803833	292865447998047	286904239654541		chloroplast thylakoid lumen [GO:0009543];mitochondrion [GO:0005739];thylakoid [GO:0009579];thylakoid lumen [GO:0031977]	endopeptidase activity [GO:0004175];serine-type peptidase activity [GO:0008236]	17	0	81.731	99	29.1	31.5	28.7	30.1	O23614	O23614	1239	CTPA2	Carboxyl-terminal-processing peptidase 2, chloroplastic
333648948669434	333953475952148	334232978820801	334579467773438	diadenosine tetraphosphate biosynthetic process [GO:0015966];glycyl-tRNA aminoacylation [GO:0006426];mitochondrial glycyl-tRNA aminoacylation [GO:0070150];response to cadmium ion [GO:0046686]	chloroplast [GO:0009507];cytoplasm [GO:0005737];cytosol [GO:0005829];endosome [GO:0005768];Golgi apparatus [GO:0005794];mitochondrion [GO:0005739];nucleus [GO:0005634];trans-Golgi network [GO:0005802]	ATP binding [GO:0005524];glycine-tRNA ligase activity [GO:0004820];protein dimerization activity [GO:0046983];transferase activity [GO:0016740]	96	0	323.31	1647	69.1	68.6	69.4	65.2	O23627;Q9FXG2	O23627	1242	At1g29880	Glycine--tRNA ligase, mitochondrial 1
258658485412598	260931949615479	260385246276855	259550228118896	nucleosome assembly [GO:0006334]	chloroplast stroma [GO:0009570];chloroplast thylakoid [GO:0009534];cytosol [GO:0005829];nucleolus [GO:0005730];nucleosome [GO:0000786]	DNA binding [GO:0003677];protein heterodimerization activity [GO:0046982]	22	0	4.9846	30	79.3	82	80	82	O23629	O23629	1243	H2B	Histone H2B.6
287908554077148	287061252593994	286283283233643	287864990234375	amylopectin biosynthetic process [GO:0010021];carbohydrate metabolic process [GO:0005975];cellular response to fructose stimulus [GO:0071332];cellular response to glucose stimulus [GO:0071333];cellular response to light stimulus [GO:0071482];cellular response to sucrose stimulus [GO:0071329];glycogen biosynthetic process [GO:0005978];starch biosynthetic process [GO:0019252];starch metabolic proce…	amyloplast [GO:0009501];chloroplast [GO:0009507];chloroplast stroma [GO:0009570];cytoplasm [GO:0005737]	1,4-alpha-glucan branching enzyme activity (using a glucosylated glycogenin as primer for glycogen synthesis) [GO:0102752];1,4-alpha-glucan branching enzyme activity [GO:0003844];cation binding [GO:0043169];hydrolase activity, hydrolyzing O-glycosyl compounds [GO:0004553]	28	0	127.52	219	30.3	25.9	32.1	29.8	O23647	O23647	1244	SBE2.1	1,4-alpha-glucan-branching enzyme 2-1, chloroplastic/amyloplastic
263887691497803	26717903137207	263572959899902	267231216430664	homoserine biosynthetic process [GO:0009090];lysine biosynthetic process via diaminopimelate [GO:0009089];threonine biosynthetic process [GO:0009088]	chloroplast stroma [GO:0009570];cytoplasm [GO:0005737]	aspartate kinase activity [GO:0004072];ATP binding [GO:0005524]	14	0	35.4	66	7.2	10.8	14	10.8	O23653	O23653	1245	AK2	Aspartokinase 2, chloroplastic
326028213500977	327215919494629	326243591308594	326779136657715	ATP metabolic process [GO:0046034];Golgi organization [GO:0007030];pollen development [GO:0009555]	cell wall [GO:0005618];chloroplast [GO:0009507];chloroplast envelope [GO:0009941];cytosol [GO:0005829];Golgi apparatus [GO:0005794];mitochondrion [GO:0005739];plant-type vacuole [GO:0000325];plasma membrane [GO:0005886];plasmodesma [GO:0009506];proton-transporting V-type ATPase, V1 domain [GO:0033180];vacuolar membrane [GO:0005774];vacuole [GO:0005773]	ATP binding [GO:0005524];protease binding [GO:0002020];proton-transporting ATPase activity, rotational mechanism [GO:0046961]	82	0	323.31	1582	71.7	69.7	70.3	68.2	O23654	O23654	1246	VHA-A	V-type proton ATPase catalytic subunit A
225581951141357	232806510925293	NaN	224845600128174	intracellular protein transport [GO:0006886];Rab protein signal transduction [GO:0032482]	endomembrane system [GO:0012505];Golgi apparatus [GO:0005794];nucleus [GO:0005634];plasma membrane [GO:0005886]	GTP binding [GO:0005525];GTPase activity [GO:0003924]	12	0	78.136	61	9	5.2	0	9	O23657;O49841	O23657	1247	RABC1	Ras-related protein RABC1
285229778289795	28231782913208	275758571624756	28272575378418		chloroplast [GO:0009507]	oxidoreductase activity [GO:0016491]	15	0	26.335	73	18.5	17.9	15.1	19.9	O23673	O23673	1248	At1g02020	Nitroreductase family protein
284591236114502	288278408050537	286112251281738	288332805633545	embryo development ending in seed dormancy [GO:0009793];mRNA processing [GO:0006397];mRNA transport [GO:0051028];nuclear-transcribed mRNA catabolic process, nonsense-mediated decay [GO:0000184];pollen tube guidance [GO:0010183];positive regulation of gene expression [GO:0010628];regulation of translation [GO:0006417];RNA splicing [GO:0008380]	exon-exon junction complex [GO:0035145];nuclear speck [GO:0016607];nucleolus [GO:0005730];nucleoplasm [GO:0005654];P-body [GO:0000932]	RNA binding [GO:0003723]	15	0	120.52	150	64	65.3	71.3	55.3	O23676	O23676	1249	MAGO	Protein mago nashi homolog
283098640441895	281632690429688	286474628448486	287905445098877		chloroplast [GO:0009507];chloroplast stroma [GO:0009570]	DNA-directed 5'-3' RNA polymerase activity [GO:0003899]	7	0	51.957	53	27.4	27.4	32	24.8	O23684	O23684	1250	At2g41950	At2g41950/T6D20.26
30859790802002	307654857635498	307844886779785	30779016494751	proteasomal protein catabolic process [GO:0010498];proteasomal ubiquitin-independent protein catabolic process [GO:0010499];proteasome-mediated ubiquitin-dependent protein catabolic process [GO:0043161];response to zinc ion [GO:0010043]	cytoplasm [GO:0005737];cytosol [GO:0005829];cytosolic ribosome [GO:0022626];nucleus [GO:0005634];proteasome complex [GO:0000502];proteasome core complex [GO:0005839];proteasome core complex, alpha-subunit complex [GO:0019773]	endopeptidase activity [GO:0004175];threonine-type endopeptidase activity [GO:0004298]	28	0	323.31	485	80.9	96.6	96.6	80.9	O23708	O23708	1252	PAB1	Proteasome subunit alpha type-2-A
293347930908203	292945861816406	293864440917969	292719974517822	proteasomal protein catabolic process [GO:0010498];proteasomal ubiquitin-independent protein catabolic process [GO:0010499];proteasome-mediated ubiquitin-dependent protein catabolic process [GO:0043161]	cytoplasm [GO:0005737];cytosol [GO:0005829];nucleus [GO:0005634];proteasome complex [GO:0000502];proteasome core complex [GO:0005839];proteasome core complex, beta-subunit complex [GO:0019774]	endopeptidase activity [GO:0004175];threonine-type endopeptidase activity [GO:0004298]	24	0	180.41	233	35.2	37.4	36.6	28.2	O23710	O23710	1253	PBB1	Proteasome subunit beta type-7-A
254756832122803	257399272918701	257865867614746	252092552185059	proteasomal protein catabolic process [GO:0010498];proteasomal ubiquitin-independent protein catabolic process [GO:0010499];proteasome-mediated ubiquitin-dependent protein catabolic process [GO:0043161]	cytoplasm [GO:0005737];cytosol [GO:0005829];nucleus [GO:0005634];plasma membrane [GO:0005886];plasmodesma [GO:0009506];proteasome complex [GO:0000502];proteasome core complex [GO:0005839];proteasome core complex, alpha-subunit complex [GO:0019773]	endopeptidase activity [GO:0004175];threonine-type endopeptidase activity [GO:0004298]	19	0	39.941	40	44.4	44.4	59.2	52	O23712	O23712	1254	PAF2	Proteasome subunit alpha type-1-B
272282104492188	25889274597168	260551109313965	266437511444092	proteasomal protein catabolic process [GO:0010498];proteasomal ubiquitin-independent protein catabolic process [GO:0010499];proteasome-mediated ubiquitin-dependent protein catabolic process [GO:0043161]	apoplast [GO:0048046];cytoplasm [GO:0005737];cytosol [GO:0005829];nucleus [GO:0005634];plasma membrane [GO:0005886];proteasome complex [GO:0000502];proteasome core complex [GO:0005839];proteasome core complex, beta-subunit complex [GO:0019774];secretory vesicle [GO:0099503];vacuolar membrane [GO:0005774];vacuole [GO:0005773]	endopeptidase activity [GO:0004175];threonine-type endopeptidase activity [GO:0004298]	13	0	6.4133	21	21.6	18.6	18.6	32.8	O23714	O23714	1255	PBD1	Proteasome subunit beta type-2-A
303450908660889	30340217590332	303902835845947	302331790924072	proteasomal protein catabolic process [GO:0010498];proteasomal ubiquitin-independent protein catabolic process [GO:0010499];proteasome-mediated ubiquitin-dependent protein catabolic process [GO:0043161];response to cadmium ion [GO:0046686];response to cold [GO:0009409]	apoplast [GO:0048046];cytoplasm [GO:0005737];cytosol [GO:0005829];nucleus [GO:0005634];peroxisome [GO:0005777];proteasome complex [GO:0000502];proteasome core complex [GO:0005839];proteasome core complex, alpha-subunit complex [GO:0019773];vacuolar membrane [GO:0005774];vacuole [GO:0005773]	endopeptidase activity [GO:0004175];threonine-type endopeptidase activity [GO:0004298]	32	0	310.18	393	68.7	65.1	71.9	67.9	O23715	O23715	1256	PAG1	Proteasome subunit alpha type-3
298058280944824	299171257019043	298777008056641	297424449920654	proteasomal protein catabolic process [GO:0010498];proteasomal ubiquitin-independent protein catabolic process [GO:0010499];proteasome-mediated ubiquitin-dependent protein catabolic process [GO:0043161]	cytoplasm [GO:0005737];nucleus [GO:0005634];proteasome core complex [GO:0005839];proteasome core complex, beta-subunit complex [GO:0019774]	endopeptidase activity [GO:0004175];threonine-type endopeptidase activity [GO:0004298]	21	0	323.31	258	69	68.2	65.3	59.5	O23717	O23717	1257	PBE1	Proteasome subunit beta type-5-A
305824413299561	305467376708984	306977653503418	305955715179443	isopentenyl diphosphate biosynthetic process, mevalonate pathway [GO:0019287];sterol biosynthetic process [GO:0016126]	cytosol [GO:0005829];peroxisome [GO:0005777]	ATP binding [GO:0005524];diphosphomevalonate decarboxylase activity [GO:0004163];identical protein binding [GO:0042802]	37	0	323.31	489	53.9	58.3	52.9	62.1	O23722	O23722	1258	MVD1	Diphosphomevalonate decarboxylase MVD1, peroxisomal
NaN	245838260650635	246519012451172	253882102966309	innate immune response [GO:0045087];leaf morphogenesis [GO:0009965];proteasome-mediated ubiquitin-dependent protein catabolic process [GO:0043161]	cytosol [GO:0005829];plasma membrane [GO:0005886];proteasome complex [GO:0000502];proteasome regulatory particle [GO:0005838]		19	0	86.775	128	0	3.6	6.5	21.1	O24412	O24412	1259	RPN8A	26S proteasome non-ATPase regulatory subunit 7 homolog A
304227199554443	302480754852295	305136165618896	304960041046143	cellular response to abscisic acid stimulus [GO:0071215];gibberellin mediated signaling pathway [GO:0010476];positive regulation of protein phosphorylation [GO:0001934];positive regulation of signal transduction [GO:0009967];regulation of translation [GO:0006417];rescue of stalled ribosome [GO:0072344];response to cadmium ion [GO:0046686];response to gibberellin [GO:0009739];response to glucose […	chloroplast [GO:0009507];cytoplasm [GO:0005737];cytosol [GO:0005829];cytosolic ribosome [GO:0022626];cytosolic small ribosomal subunit [GO:0022627];nucleus [GO:0005634];polysomal ribosome [GO:0042788]	enzyme binding [GO:0019899];MAP-kinase scaffold activity [GO:0005078];protein kinase C binding [GO:0005080];ribosome binding [GO:0043022];structural constituent of ribosome [GO:0003735]	48	0	323.31	648	63.6	52.3	60.6	63	O24456	O24456	1261	RACK1A	Receptor for activated C kinase 1A
306255779266357	3062331199646	305958385467529	306962738037109	acetyl-CoA biosynthetic process from pyruvate [GO:0006086];glycolytic process [GO:0006096]	chloroplast [GO:0009507];chloroplast envelope [GO:0009941];chloroplast stroma [GO:0009570];plastid [GO:0009536]	pyruvate dehydrogenase (acetyl-transferring) activity [GO:0004739]	55	0	323.31	704	66.8	66.6	65.4	58.9	O24457	O24457	1262	PDH-E1 ALPHA	Pyruvate dehydrogenase E1 component subunit alpha-3, chloroplastic
196590976715088	NaN	NaN	190555267333984	intracellular protein transport [GO:0006886];protein secretion [GO:0009306];Rab protein signal transduction [GO:0032482];regulation of exocytosis [GO:0017157];vesicle docking involved in exocytosis [GO:0006904]	cytosol [GO:0005829];endomembrane system [GO:0012505];Golgi membrane [GO:0000139];plasma membrane [GO:0005886]	GTP binding [GO:0005525];GTPase activity [GO:0003924]	9	0	5.2145	20	10.2	7.9	7.9	10.2	O24466	O24466	1263	RABE1A	Ras-related protein RABE1a
315634727478027	314286727905273	315129108428955	314989547729492	methylglyoxal catabolic process to D-lactate via S-lactoyl-glutathione [GO:0019243]	cytosol [GO:0005829];secretory vesicle [GO:0099503]	hydroxyacylglutathione hydrolase activity [GO:0004416];metal ion binding [GO:0046872]	27	0	323.31	440	72.5	85.3	72.5	83.3	O24496	O24496	1264	GLX2-2	Hydroxyacylglutathione hydrolase cytoplasmic
223570003509521	228582515716553	22448314666748	NaN	cellular response to hypoxia [GO:0071456];oxygen transport [GO:0015671];response to hypoxia [GO:0001666]	cell wall [GO:0005618];cytosol [GO:0005829];plasma membrane [GO:0005886];plasmodesma [GO:0009506]	heme binding [GO:0020037];metal ion binding [GO:0046872];oxygen binding [GO:0019825]	6	0	9.5619	34	10.6	5	5	0	O24520	O24520	1265	AHB1	Non-symbiotic hemoglobin 1
29550724029541	295184268951416	297478809356689	297134208679199	fatty acid metabolic process [GO:0006631];triglyceride biosynthetic process [GO:0019432]	cytosol [GO:0005829]	heme binding [GO:0020037];metal ion binding [GO:0046872];oxygen binding [GO:0019825];oxygen carrier activity [GO:0005344]	16	0	54.252	149	69.6	73.4	70.9	76.6	O24521	O24521	1266	AHB2	Non-symbiotic hemoglobin 2
252062034606934	255197429656982	255086040496826	252062034606934	cell wall macromolecule catabolic process [GO:0016998];chitin catabolic process [GO:0006032];defense response [GO:0006952];polysaccharide catabolic process [GO:0000272];response to fungus [GO:0009620]		chitin binding [GO:0008061];chitinase activity [GO:0004568]	3	0	3.0266	6	5.7	8.7	3	12.5	O24598	O24598	1267	At2g43580	Endochitinase At2g43580
275938453674316	29458028793335	295329303741455	294637107849121	cell wall macromolecule catabolic process [GO:0016998];chitin catabolic process [GO:0006032];leaf senescence [GO:0010150];polysaccharide catabolic process [GO:0000272];response to amitrole [GO:0072722];response to silver ion [GO:0010272];response to virus [GO:0009615];systemic acquired resistance [GO:0009627]	apoplast [GO:0048046];secretory vesicle [GO:0099503]	chitin binding [GO:0008061];chitinase activity [GO:0004568]	16	0	272.73	168	55.2	63.5	63.5	52.7	O24603	O24603	1268	CHI	Endochitinase CHI
232376117706299	23328275680542	233787517547607	236245536804199	proteasomal protein catabolic process [GO:0010498];proteasomal ubiquitin-independent protein catabolic process [GO:0010499];proteasome-mediated ubiquitin-dependent protein catabolic process [GO:0043161];ubiquitin-dependent protein catabolic process [GO:0006511]	cytoplasm [GO:0005737];nucleus [GO:0005634];plastid [GO:0009536];proteasome complex [GO:0000502];proteasome core complex [GO:0005839];proteasome core complex, alpha-subunit complex [GO:0019773];vacuole [GO:0005773]	endopeptidase activity [GO:0004175];threonine-type endopeptidase activity [GO:0004298]	19	0	12.977	15	60.8	57.2	60.8	60.8	O24616	O24616	1269	PAD2	Proteasome subunit alpha type-7-B
285030937194824	283338565826416	284252643585205	280395183563232	proteasomal protein catabolic process [GO:0010498];proteasomal ubiquitin-independent protein catabolic process [GO:0010499];proteasome-mediated ubiquitin-dependent protein catabolic process [GO:0043161]	cytoplasm [GO:0005737];nucleus [GO:0005634];proteasome core complex [GO:0005839];proteasome core complex, beta-subunit complex [GO:0019774]	endopeptidase activity [GO:0004175];threonine-type endopeptidase activity [GO:0004298]	20	0	104.82	142	40.2	35.2	40.7	57.8	O24633	O24633	1270	PBD2	Proteasome subunit beta type-2-B
319108142852783	319616832733154	319850196838379	320442047119141	protein transport [GO:0015031];small GTPase mediated signal transduction [GO:0007264];vesicle-mediated transport [GO:0016192]	apoplast [GO:0048046];cytoplasm [GO:0005737];cytosol [GO:0005829];plasmodesma [GO:0009506]	GTPase activator activity [GO:0005096];Rab GDP-dissociation inhibitor activity [GO:0005093];Rab GTPase binding [GO:0017137]	56	0	323.31	868	68.9	70.9	67.6	63.1	O24653	O24653	1271	GDI2	Guanosine nucleotide diphosphate dissociation inhibitor 2
292052249908447	294792537689209	293778038024902	295691165924072	cell wall macromolecule catabolic process [GO:0016998];chitin catabolic process [GO:0006032];defense response [GO:0006952];polysaccharide catabolic process [GO:0000272]	secretory vesicle [GO:0099503]	chitin binding [GO:0008061];chitinase activity [GO:0004568]	8	0	323.31	204	32.6	38.6	38.6	38.6	O24658	O24658	1272	At2g43590	Endochitinase At2g43590
282900447845459	288649044036865	283878402709961	284475440979004	cellular response to hypoxia [GO:0071456]		hydrolase activity [GO:0016787]	14	0	31.931	91	43.9	48.6	47.1	47.1	O48587	O48587	1277	T19K24.16	At5g44730
312400779724121	312343215942383	310892314910889	313100261688232		cytosol [GO:0005829]	catalytic activity [GO:0003824];molybdenum ion binding [GO:0030151];pyridoxal phosphate binding [GO:0030170]	31	0	322.4	378	66.9	73.1	64.6	74.7	O48588	O48588	1278	T19K24.17	Molybdenum cofactor sulfurase family protein
324595108032227	324109191894531	324167671203613	322915115356445	asparaginyl-tRNA aminoacylation [GO:0006421];plant ovule development [GO:0048481]	chloroplast [GO:0009507];chloroplast stroma [GO:0009570];mitochondrion [GO:0005739]	asparagine-tRNA ligase activity [GO:0004816];ATP binding [GO:0005524];DNA binding [GO:0003677]	37	0	323.31	487	43.6	40.9	40.9	39	O48593	O48593	1279	SYNO	Asparagine--tRNA ligase, chloroplastic/mitochondrial
306318340301514	306226139068604	304981937408447	30572717666626	response to cadmium ion [GO:0046686];response to oxidative stress [GO:0006979]	chloroplast [GO:0009507];cytosol [GO:0005829];mitochondrion [GO:0005739];plasma membrane [GO:0005886]	glutathione peroxidase activity [GO:0004602];peroxidase activity [GO:0004601];phospholipid-hydroperoxide glutathione peroxidase activity [GO:0047066]	31	0	257.24	404	68.5	65.9	68.5	56.9	O48646	O48646	1280	GPX6	Probable phospholipid hydroperoxide glutathione peroxidase 6, mitochondrial
307217540740967	307109603881836	307958316802979	307029762268066	polyamine biosynthetic process [GO:0006596];spermidine biosynthetic process [GO:0008295]	cytosol [GO:0005829];mitochondrion [GO:0005739];plasma membrane [GO:0005886]	spermidine synthase activity [GO:0004766]	23	0	323.31	347	64.7	62.9	67.4	66.5	O48661	O48661	1281	SPDSYN2	Spermidine synthase 2
307751750946045	306549739837646	307414970397949	308592720031738	defense response by callose deposition in cell wall [GO:0052544];defense response to bacterium [GO:0042742];glucosinolate biosynthetic process [GO:0019761]	cytosol [GO:0005829];intracellular membrane-bounded organelle [GO:0043231];nucleus [GO:0005634]	quercetin 3-O-glucosyltransferase activity [GO:0080043];quercetin 7-O-glucosyltransferase activity [GO:0080044];thiohydroximate beta-D-glucosyltransferase activity [GO:0047251];UDP-glucose: 4-methylthiobutylhydroximate S-glucosyltransferase activity [GO:0102659];UDP-glucose: 6-methylthiohexylhydroximate S-glucosyltransferase activity [GO:0103100];UDP-glucose: 9-methylthiononylhydroximate S-glucos…	35	0	295.8	483	47.6	47.2	47.6	47.2	O48676	O48676	1282	UGT74B1	UDP-glycosyltransferase 74B1
259528484344482	260192012786865	260343112945557	267249450683594	cell wall modification [GO:0042545];pectin catabolic process [GO:0045490];response to bacterium [GO:0009617]	cell wall [GO:0005618];extracellular region [GO:0005576]	aspartyl esterase activity [GO:0045330];pectinesterase activity [GO:0030599];pectinesterase inhibitor activity [GO:0046910]	5	0	10.406	27	11.2	11.2	7.1	6.2	O48711	O48711	1284	PME12	Probable pectinesterase/pectinesterase inhibitor 12
288069496154785	288720283508301	288268413543701	291206760406494	chloroplast accumulation movement [GO:0009904];chloroplast avoidance movement [GO:0009903]	cytosol [GO:0005829];peroxisome [GO:0005777];plasma membrane [GO:0005886]		25	0	62.364	151	19.1	16.4	18.8	20.8	O48724	O48724	1286	WEB1	Protein WEAK CHLOROPLAST MOVEMENT UNDER BLUE LIGHT 1
240929718017578	238865089416504	233081359863281	239303951263428	ubiquitin-dependent protein catabolic process [GO:0006511]	cytoplasm [GO:0005737];nucleus [GO:0005634];proteasome regulatory particle, lid subcomplex [GO:0008541]	endopeptidase activator activity [GO:0061133];proteasome binding [GO:0070628];ubiquitin binding [GO:0043130]	8	0	25.24	33	6.7	14.7	15.7	8.3	O48726	O48726	1287	RPN13	26S proteasome regulatory subunit RPN13
297657718658447	293236274719238	297791748046875	297536926269531	cell redox homeostasis [GO:0045454];glycerol ether metabolic process [GO:0006662];negative regulation of catalytic activity [GO:0043086];positive regulation of catalytic activity [GO:0043085];regulation of carbohydrate metabolic process [GO:0006109];response to cold [GO:0009409]	apoplast [GO:0048046];chloroplast [GO:0009507];chloroplast envelope [GO:0009941];chloroplast stroma [GO:0009570];cytoplasm [GO:0005737];extracellular region [GO:0005576];stromule [GO:0010319];thylakoid [GO:0009579]	enzyme activator activity [GO:0008047];enzyme inhibitor activity [GO:0004857];oxidoreductase activity, acting on a sulfur group of donors, disulfide as acceptor [GO:0016671];protein disulfide oxidoreductase activity [GO:0015035];protein-disulfide reductase activity [GO:0047134]	13	0	228.03	144	38.5	35.2	39.7	39.7	O48737	O48737	1288	At1g03680	Thioredoxin M1, chloroplastic
314365367889404	313728523254395	314499759674072	314808712005615	chlorophyll biosynthetic process [GO:0015995];photosynthesis [GO:0015979]	chloroplast [GO:0009507];chloroplast envelope [GO:0009941];chloroplast membrane [GO:0031969];chloroplast thylakoid [GO:0009534];chloroplast thylakoid membrane [GO:0009535];extracellular region [GO:0005576]	NADPH dehydrogenase activity [GO:0003959];protochlorophyllide reductase activity [GO:0016630]	43	0	323.31	515	63.8	60.8	60.8	62.3	O48741	O48741	1289	PORC	Protochlorophyllide reductase C, chloroplastic
223159770965576	224659538269043	NaN	NaN	cytokinesis by cell plate formation [GO:0000911];microtubule nucleation [GO:0007020];microtubule organizing center organization [GO:0031023];mitotic cell cycle [GO:0000278];spindle assembly [GO:0051225]	microtubule [GO:0005874]		2	0.0057595	1.7565	1	3.7	3.7	0	0	O48767	O48767	1290	AUG2	AUGMIN subunit 2
29851131439209	298420162200928	298796291351318	297920970916748	cell redox homeostasis [GO:0045454];response to endoplasmic reticulum stress [GO:0034976]	endoplasmic reticulum [GO:0005783];endoplasmic reticulum lumen [GO:0005788];Golgi apparatus [GO:0005794];plasma membrane [GO:0005886];vacuole [GO:0005773]	protein disulfide isomerase activity [GO:0003756]	26	0	193.07	359	42.3	40.5	37	41.8	O48773	O48773	1291	PDIL2-3	Protein disulfide-isomerase 2-3
259366092681885	252292366027832	260752468109131	255790843963623	carbohydrate metabolic process [GO:0005975]		beta-glucosidase activity [GO:0008422];scopolin beta-glucosidase activity [GO:0102483]	6	0	11.725	31	7.2	5.9	7.8	7.2	O48779	O48779	1292	BGLU33	Beta-glucosidase 33
276412734985352	278981609344482	276642456054688	277299423217773	carotenoid biosynthetic process [GO:0016117];cellular response to UV-C [GO:0071494];chloroplast-nucleus signaling pathway [GO:0010019];flavonoid biosynthetic process [GO:0009813];heme oxidation [GO:0006788];photosynthesis [GO:0015979];phytochromobilin biosynthetic process [GO:0010024];regulation of meristem growth [GO:0010075];regulation of stomatal movement [GO:0010119]	chloroplast [GO:0009507]	heme binding [GO:0020037];heme oxygenase (decyclizing) activity [GO:0004392];metal ion binding [GO:0046872]	17	0	30.639	94	31.9	37.9	35.5	26.6	O48782	O48782	1293	HO1	Heme oxygenase 1, chloroplastic
288826789855957	282985019683838	287178058624268	283157482147217		integral component of membrane [GO:0016021];peroxisome [GO:0005777];plasma membrane [GO:0005886]	ATP binding [GO:0005524];protein kinase activity [GO:0004672]	15	0	107.66	85	19.3	21.4	19.1	17.5	O48788	O48788	1294	At2g26730	Probable inactive receptor kinase At2g26730
306097278594971	305609245300293	307389240264893	306401348114014		cytosol [GO:0005829];nucleus [GO:0005634]		48	0	323.31	479	50.2	55.1	55.9	55.7	O48802	O48802	1295	CLMP1	Protein CLMP1
322521705627441	322988204956055	322956199645996	322771682739258	circadian rhythm [GO:0007623];response to abscisic acid [GO:0009737];response to cold [GO:0009409];response to high light intensity [GO:0009644];response to salt stress [GO:0009651];response to water deprivation [GO:0009414]	chloroplast [GO:0009507];plasma membrane [GO:0005886]		43	0	323.31	672	74.6	77	77	76.3	O48832	O48832	1297	ERD7	Protein EARLY-RESPONSIVE TO DEHYDRATION 7, chloroplastic
259762897491455	269130783081055	264280300140381	264031944274902	proteasome-mediated ubiquitin-dependent protein catabolic process [GO:0043161];regulation of protein catabolic process [GO:0042176]	cytosol [GO:0005829];endoplasmic reticulum [GO:0005783];nucleus [GO:0005634];proteasome complex [GO:0000502];proteasome regulatory particle, base subcomplex [GO:0008540];proteasome storage granule [GO:0034515]	enzyme regulator activity [GO:0030234]	61	0	323.31	411	8.2	10.9	10.7	7.7	O48844	O48844	1298	RPN2A	26S proteasome non-ATPase regulatory subunit 1 homolog A
313048133850098	314730033874512	31361759185791	316088924407959	cellular response to phosphate starvation [GO:0016036];glycolipid biosynthetic process [GO:0009247];sulfolipid biosynthetic process [GO:0046506]	chloroplast [GO:0009507];plasma membrane [GO:0005886]	sulfotransferase activity [GO:0008146];UDPsulfoquinovose synthase activity [GO:0046507];zinc ion binding [GO:0008270]	31	0	323.31	439	54.3	53.9	61	56.2	O48917	O48917	1300	SQD1	UDP-sulfoquinovose synthase, chloroplastic
301302585601807	299681549072266	303136520385742	300680465698242	chloroplast accumulation movement [GO:0009904];chloroplast avoidance movement [GO:0009903];circadian rhythm [GO:0007623];negative regulation of anion channel activity by blue light [GO:0010362];phototropism [GO:0009638];protein autophosphorylation [GO:0046777];protein phosphorylation [GO:0006468];protein-chromophore linkage [GO:0018298];regulation of proton transport [GO:0010155];regulation of st…	cell surface [GO:0009986];cytoplasm [GO:0005737];cytoplasmic side of plasma membrane [GO:0009898];nucleus [GO:0005634];plasma membrane [GO:0005886];vacuole [GO:0005773]	ATP binding [GO:0005524];blue light photoreceptor activity [GO:0009882];FMN binding [GO:0010181];identical protein binding [GO:0042802];kinase activity [GO:0016301];mRNA binding [GO:0003729];protein kinase activity [GO:0004672];protein serine/threonine kinase activity [GO:0004674]	37	0	234.17	230	21.9	28.8	26.2	33	O48963	O48963	1302	PHOT1	Phototropin-1
293782386779785	289371376037598	294270839691162	291141109466553	cell wall modification [GO:0042545];defense response to Gram-negative bacterium [GO:0050829];pectin catabolic process [GO:0045490];response to fungus [GO:0009620];response to nematode [GO:0009624]	apoplast [GO:0048046];cell wall [GO:0005618];cytoplasm [GO:0005737];cytosol [GO:0005829];plasma membrane [GO:0005886]	aspartyl esterase activity [GO:0045330];pectinesterase activity [GO:0030599];pectinesterase inhibitor activity [GO:0046910]	22	0	297.2	221	27.7	24.7	29.2	33.3	O49006	O49006	1303	PME3	Pectinesterase/pectinesterase inhibitor 3
NaN	187451095581055	187880363464355	NaN	formation of cytoplasmic translation initiation complex [GO:0001732];translational initiation [GO:0006413]	cytosol [GO:0005829];eukaryotic 43S preinitiation complex [GO:0016282];eukaryotic 48S preinitiation complex [GO:0033290];eukaryotic translation initiation factor 3 complex [GO:0005852];nucleus [GO:0005634]	mRNA binding [GO:0003729];translation initiation factor activity [GO:0003743];translation initiation factor binding [GO:0031369]	83	0	323.31	526	1.4	1.9	3	0	O49160	O49160	1305	TIF3C1	Eukaryotic translation initiation factor 3 subunit C
251474418640137	254810523986816	2557692527771	255137329101563	defense response [GO:0006952];response to jasmonic acid [GO:0009753]	vacuole [GO:0005773]	acid phosphatase activity [GO:0003993];nutrient reservoir activity [GO:0045735];transcription factor binding [GO:0008134]	9	0	88.954	61	8.5	8.1	8.5	8.5	O49195	O49195	1306	VSP1	Vegetative storage protein 1
274567756652832	267142391204834	272944774627686	268307437896729	cysteine biosynthetic process [GO:0019344];hydrogen sulfide biosynthetic process [GO:0070814];sulfate assimilation [GO:0000103]	chloroplast [GO:0009507];plastid [GO:0009536]	adenylylsulfate kinase activity [GO:0004020];ATP binding [GO:0005524]	11	0	36.295	24	15.4	18.4	18.8	19.5	O49196	O49196	1307	APK2	Adenylyl-sulfate kinase 2, chloroplastic
331554794311523	332838897705078	332672386169434	331701393127441	CTP biosynthetic process [GO:0006241];GTP biosynthetic process [GO:0006183];purine nucleotide metabolic process [GO:0006163];pyrimidine nucleotide metabolic process [GO:0006220];response to oxidative stress [GO:0006979];UTP biosynthetic process [GO:0006228]	chloroplast thylakoid lumen [GO:0009543];cytosol [GO:0005829];mitochondrial inner membrane [GO:0005743];mitochondrial intermembrane space [GO:0005758];mitochondrion [GO:0005739];plastid [GO:0009536]	ATP binding [GO:0005524];cobalt ion binding [GO:0050897];nucleoside diphosphate kinase activity [GO:0004550];zinc ion binding [GO:0008270]	24	0	323.31	669	48.7	48.7	48.7	48.7	O49203	O49203	1308	NDPK3	Nucleoside diphosphate kinase III, chloroplastic/mitochondrial
222508392333984	230942783355713	212092552185059	227559299468994	'de novo' GDP-L-fucose biosynthetic process [GO:0042351];L-fucose biosynthetic process [GO:0006005]		GDP-L-fucose synthase activity [GO:0050577];isomerase activity [GO:0016853]	23	0	60.457	78	23.5	30.3	22.9	26.6	O49213	O49213	1309	GER1	GDP-L-fucose synthase 1
24196704864502	244725875854492	244683055877686	244702301025391		cytosol [GO:0005829]	amino acid binding [GO:0016597]	20	0	89.116	72	8.4	14.3	2.9	9.1	O49285	O49285	1310	ACR3	ACT domain-containing protein ACR3
263792304992676	26410961151123	266361637115479	268589916229248	rRNA processing [GO:0006364]	nucleolus [GO:0005730]	ATP binding [GO:0005524];RNA binding [GO:0003723];RNA helicase activity [GO:0003724]	14	0	12.117	25	2.6	1.4	2.6	1.4	O49289	O49289	1311	RH29	Putative DEAD-box ATP-dependent RNA helicase 29
304238224029541	302751979827881	30179615020752	30352897644043		chloroplast [GO:0009507];chloroplast stroma [GO:0009570]	carboxyvinyl-carboxyphosphonate phosphorylmutase activity [GO:0008807]	18	0	252.79	203	49	49.3	51	51	O49290	O49290	1312	At1g77060	Carboxyvinyl-carboxyphosphonate phosphorylmutase, chloroplastic
305476570129395	305139923095703	303664054870605	302282562255859	photosynthesis [GO:0015979]	chloroplast [GO:0009507];chloroplast stroma [GO:0009570];chloroplast thylakoid [GO:0009534];chloroplast thylakoid lumen [GO:0009543];cytosol [GO:0005829];extrinsic component of membrane [GO:0019898];mitochondrion [GO:0005739];photosystem II oxygen evolving complex [GO:0009654];thylakoid [GO:0009579];thylakoid lumen [GO:0031977]	calcium ion binding [GO:0005509]	12	0	66.397	128	41.5	41.5	41.5	47.3	O49292	O49292	1313	PPD4	PsbP domain-containing protein 4, chloroplastic
326642227172852	325501136779785	32585823059082	325242347717285	carbohydrate metabolic process [GO:0005975];glucose metabolic process [GO:0006006];response to cadmium ion [GO:0046686]	cytoplasm [GO:0005737];cytosol [GO:0005829];nucleus [GO:0005634];plasma membrane [GO:0005886]	magnesium ion binding [GO:0000287];phosphoglucomutase activity [GO:0004614]	86	0	323.31	1160	76.7	68.8	73.1	71.5	O49299	O49299	1314	At1g23190	Probable phosphoglucomutase, cytoplasmic 1
281595687866211	282738647460938	281378498077393	281664810180664	abscisic acid-activated signaling pathway [GO:0009738];positive regulation of abscisic acid-activated signaling pathway [GO:0009789];positive regulation of GTPase activity [GO:0043547]	cytosol [GO:0005829];nucleus [GO:0005634];plasma membrane [GO:0005886]	GTPase activator activity [GO:0005096];metal ion binding [GO:0046872];phospholipid binding [GO:0005543]	10	0	29.115	82	44.8	44.8	46.1	40	O49303	O49303	1315	CAR8	Protein C2-DOMAIN ABA-RELATED 8
323705673217773	324392890930176	322978897094727	323439254760742	defense response [GO:0006952]	cytosol [GO:0005829];nucleus [GO:0005634]		25	0	198.22	349	84.4	82.5	84.4	84.4	O49304	O49304	1316	At1g23130	At1g23130/T26J12_10
NaN	244814224243164	NaN	250339336395264	defense response [GO:0006952];protein phosphorylation [GO:0006468]	peroxisome [GO:0005777];plasma membrane [GO:0005886];plasmodesma [GO:0009506]	ATP binding [GO:0005524];non-membrane spanning protein tyrosine kinase activity [GO:0004715];protein kinase binding [GO:0019901];transmembrane receptor protein serine/threonine kinase activity [GO:0004675]	5	0	9.3105	14	0	5.2	0	5.2	O49339;Q8H1G6;Q9ZW72	O49339	1318	PTI12;PTI11	PTI1-like tyrosine-protein kinase 2;PTI1-like tyrosine-protein kinase 1
235350456237793	237746486663818	NaN	236198616027832	chloroplast RNA modification [GO:1900865];cytidine to uridine editing [GO:0016554];mitochondrial mRNA modification [GO:0080156];mitochondrial RNA modification [GO:1900864];mRNA processing [GO:0006397]	chloroplast [GO:0009507];mitochondrion [GO:0005739]	protein dimerization activity [GO:0046983]	2	0	24.541	15	3.1	3.1	0	3.1	O49429	O49429	1321	MORF1	Multiple organellar RNA editing factor 1, mitochondrial
313939170837402	314390659332275	3139453125	312961406707764		cytosol [GO:0005829];plasma membrane [GO:0005886]	mRNA binding [GO:0003729]	19	0	323.31	307	80.4	80.4	68	80.4	O49453	O49453	1323	At4g28440	Uncharacterized protein At4g28440
23671199798584	NaN	NaN	238284225463867	chaperone cofactor-dependent protein refolding [GO:0051085]	cytosol [GO:0005829]	chaperone binding [GO:0051087];unfolded protein binding [GO:0051082]	5	0	17.475	13	5.5	0	0	5.5	O49457	O49457	1324	F20O9.160	DNAJ heat shock family protein
297633514404297	298727474212646	298573760986328	298622760772705	lignin biosynthetic process [GO:0009809]	cytosol [GO:0005829]	cinnamyl-alcohol dehydrogenase activity [GO:0045551];oxidoreductase activity, acting on the CH-OH group of donors, NAD or NADP as acceptor [GO:0016616];sinapyl alcohol dehydrogenase activity [GO:0052747];zinc ion binding [GO:0008270]	39	0	323.31	463	51.8	66.9	51.8	55.5	O49482	O49482	1325	CAD5	Cinnamyl alcohol dehydrogenase 5
332822303771973	331683006286621	332234573364258	331673736572266	cellular amino acid metabolic process [GO:0006520];embryo development ending in seed dormancy [GO:0009793];L-serine biosynthetic process [GO:0006564];megagametogenesis [GO:0009561];pollen development [GO:0009555];sulfur amino acid metabolic process [GO:0000096]	chloroplast [GO:0009507];chloroplast stroma [GO:0009570];mitochondrion [GO:0005739];plasma membrane [GO:0005886];plastid [GO:0009536]	ATP binding [GO:0005524];NAD binding [GO:0051287];phosphoglycerate dehydrogenase activity [GO:0004617]	57	0	323.31	1312	63.5	61.7	62.2	62.9	O49485	O49485	1326	PGDH1	D-3-phosphoglycerate dehydrogenase 1, chloroplastic
31779447555542	316168422698975	317798385620117	317708511352539	coumarin biosynthetic process [GO:0009805];lignin biosynthetic process [GO:0009809];methylation [GO:0032259];response to cadmium ion [GO:0046686]	cytosol [GO:0005829];plasma membrane [GO:0005886]	caffeoyl-CoA O-methyltransferase activity [GO:0042409];metal ion binding [GO:0046872];S-adenosylmethionine-dependent methyltransferase activity [GO:0008757]	38	0	323.31	1093	86.1	97.7	94.6	94.6	O49499	O49499	1327	CCOAOMT1	Caffeoyl-CoA O-methyltransferase 1
251301422119141	244832077026367	253059482574463	249728546142578	intracellular protein transport [GO:0006886];Rab protein signal transduction [GO:0032482]	cytosol [GO:0005829];endomembrane system [GO:0012505];endosome [GO:0005768];plasma membrane [GO:0005886]	GTP binding [GO:0005525];GTPase activity [GO:0003924]	5	0	5.507	20	8.8	8.8	5.1	5.1	O49513	O49513	1329	RABA1E	Ras-related protein RABA1e
291382160186768	293429107666016	294612140655518	295122032165527	[2Fe-2S] cluster assembly [GO:0044571];iron-sulfur cluster assembly [GO:0016226]	cytosol [GO:0005829];mitochondrion [GO:0005739];plastid [GO:0009536]	ATP binding [GO:0005524];cysteine desulfurase activity [GO:0031071];iron-sulfur cluster binding [GO:0051536];pyridoxal phosphate binding [GO:0030170];zinc ion binding [GO:0008270]	38	0	323.31	374	41.3	43.7	41.7	39.1	O49543	O49543	1331	NIFS1	Cysteine desulfurase, mitochondrial
255367374420166	253530616760254	25132417678833	250981636047363	cell differentiation [GO:0030154];floral organ development [GO:0048437];gametophyte development [GO:0048229];hormone-mediated signaling pathway [GO:0009755];regulation of meristem growth [GO:0010075];regulation of meristem structural organization [GO:0009934]	integral component of membrane [GO:0016021];plasma membrane [GO:0005886]	ATP binding [GO:0005524];identical protein binding [GO:0042802];protein self-association [GO:0043621];protein serine/threonine kinase activity [GO:0004674];receptor serine/threonine kinase binding [GO:0033612]	5	0.00094073	2.4805	11	0.7	0.7	1.9	0.7	O49545	O49545	1332	BAM1	Leucine-rich repeat receptor-like serine/threonine-protein kinase BAM1
263177242279053	255929756164551	260036964416504	260799942016602	embryo development ending in seed dormancy [GO:0009793];nucleotide-excision repair [GO:0006289];proteasome-mediated ubiquitin-dependent protein catabolic process [GO:0043161];protein ubiquitination [GO:0016567];red, far-red light phototransduction [GO:0009585]	cullin-RING ubiquitin ligase complex [GO:0031461];cytosol [GO:0005829];nucleus [GO:0005634]	damaged DNA binding [GO:0003684]	31	0	20.035	82	14.8	13	14.1	13.5	O49552	O49552	1333	DDB1B	DNA damage-binding protein 1b
242763252258301	243326530456543	NaN	248101959228516	mRNA splicing, via spliceosome [GO:0000398]	cytosol [GO:0005829];spliceosomal complex [GO:0005681]		5	0	15.801	29	11	15.9	0	13.1	O49553	O49553	1334	At4g21110	AT4g21110/F7J7_50
306230506896973	306779155731201	30589958190918	307830047607422		chloroplast [GO:0009507];chloroplast stroma [GO:0009570]	ATP binding [GO:0005524];phosphoprotein phosphatase activity [GO:0004721];phosphotransferase activity, phosphate group as acceptor [GO:0016776];protein kinase activity [GO:0004672];protein serine/threonine kinase activity [GO:0004674]	38	0	323.31	376	82.9	64	70.5	72	O49562	O49562	1335	RP1	Pyruvate, phosphate dikinase regulatory protein 1, chloroplastic
261656093597412	259203662872314	263200340270996	256552639007568	chromatin assembly or disassembly [GO:0006333]	chromatin [GO:0000785];cytosol [GO:0005829];nucleus [GO:0005634]	chromatin binding [GO:0003682];DNA binding [GO:0003677];DNA-binding transcription factor activity [GO:0003700];structural constituent of chromatin [GO:0030527]	5	0	10.987	19	28.5	29.2	29.2	27.1	O49596	O49596	1337	HMGB2	High mobility group B protein 2
264462585449219	261486434936523	258526706695557	261522846221924	negative regulation of catalytic activity [GO:0043086];response to karrikin [GO:0080167]	vacuole [GO:0005773]	enzyme inhibitor activity [GO:0004857]	5	0	9.5103	16	36.1	20	32.2	32.2	O49603	O49603	1338	C/VIF2	Cell wall / vacuolar inhibitor of fructosidase 2
304849090576172	304015159606934	304036502838135	305675582885742	plant-type cell wall modification [GO:0009827]	plasma membrane [GO:0005886]	serine-type endopeptidase activity [GO:0004252];serine-type peptidase activity [GO:0008236]	24	0	144.92	181	29.1	30.2	27.1	27.6	O49607	O49607	1339	SBT1.6	Subtilisin-like protease SBT1.6
251446437835693	254087600708008	249296283721924	262819766998291	cellular iron ion homeostasis [GO:0006879];iron-sulfur cluster assembly [GO:0016226]	cytoplasm [GO:0005737];cytosol [GO:0005829];mitochondrial matrix [GO:0005759];mitochondrion [GO:0005739]	2 iron, 2 sulfur cluster binding [GO:0051537];4 iron, 4 sulfur cluster binding [GO:0051539];ferrous iron binding [GO:0008198];structural molecule activity [GO:0005198]	8	0	48.586	34	29.3	28.7	35.9	34.1	O49627	O49627	1341	ISU1	Iron-sulfur cluster assembly protein 1
278296566009521	277979202270508	275830516815186	276131591796875		chloroplast [GO:0009507];chloroplast thylakoid [GO:0009534];chloroplast thylakoid membrane [GO:0009535];cytosol [GO:0005829];mitochondrion [GO:0005739];plastoglobule [GO:0010287];thylakoid [GO:0009579];thylakoid lumen [GO:0031977]		12	0	102.2	103	37.4	27.4	27.4	46.8	O49629	O49629	1342	PAP2	Probable plastid-lipid-associated protein 2, chloroplastic
278379173278809	280687141418457	279685668945313	280740337371826	tRNA threonylcarbamoyladenosine modification [GO:0002949]	cytosol [GO:0005829];EKC/KEOPS complex [GO:0000408];nucleus [GO:0005634]	metal ion binding [GO:0046872];N(6)-L-threonylcarbamoyladenine synthase activity [GO:0061711]	10	0	70.028	94	24.4	24.6	20.7	20.7	O49653	O49653	1343	GCP2	Probable tRNA N6-adenosine threonylcarbamoyltransferase
302506771087646	307062740325928	311160106658936	308732757568359	carotene catabolic process [GO:0016121]	chloroplast [GO:0009507];chloroplast stroma [GO:0009570];cytosol [GO:0005829];plastoglobule [GO:0010287]	carotenoid dioxygenase activity [GO:0010436];metal ion binding [GO:0046872]	34	0	155.45	293	57.1	52.9	58.7	50.1	O49675	O49675	1345	CCD4	Probable carotenoid cleavage dioxygenase 4, chloroplastic
297271537780762	296935024261475	295537853240967	29450870513916	abscisic acid-activated signaling pathway [GO:0009738];positive regulation of response to water deprivation [GO:1902584];regulation of protein serine/threonine phosphatase activity [GO:0080163]	cytoplasm [GO:0005737];cytosol [GO:0005829];nucleus [GO:0005634];plasma membrane [GO:0005886]	abscisic acid binding [GO:0010427];identical protein binding [GO:0042802];protein homodimerization activity [GO:0042803];protein phosphatase inhibitor activity [GO:0004864];signaling receptor activity [GO:0038023]	19	0	166.08	300	69.6	63.4	58.6	77.5	O49686	O49686	1346	PYR1	Abscisic acid receptor PYR1
368663635253906	368197898864746	36836109161377	368052062988281	DNA methylation-dependent heterochromatin assembly [GO:0006346];methionine biosynthetic process [GO:0009086];methylation [GO:0032259];positive regulation of histone H3-K9 methylation [GO:0051574];response to cadmium ion [GO:0046686];response to zinc ion [GO:0010043]	apoplast [GO:0048046];chloroplast [GO:0009507];chloroplast stroma [GO:0009570];cytosol [GO:0005829];extracellular region [GO:0005576];peroxisome [GO:0005777];plasma membrane [GO:0005886];plasmodesma [GO:0009506];vacuolar membrane [GO:0005774]	5-methyltetrahydropteroyltriglutamate-homocysteine S-methyltransferase activity [GO:0003871];copper ion binding [GO:0005507];methionine synthase activity [GO:0008705];zinc ion binding [GO:0008270]	122	0	323.31	5957	88	88.9	86.5	87.3	O50008	O50008	1348	MS1	5-methyltetrahydropteroyltriglutamate--homocysteine methyltransferase 1
306911239624023	305420398712158	306419448852539	30452579498291	arginine biosynthetic process via ornithine [GO:0042450];citrulline biosynthetic process [GO:0019240]	chloroplast [GO:0009507];chloroplast stroma [GO:0009570];intracellular membrane-bounded organelle [GO:0043231]	amino acid binding [GO:0016597];ornithine carbamoyltransferase activity [GO:0004585]	26	0	155.18	389	48.8	52.8	45.1	41.3	O50039	O50039	1349	OTC	Ornithine carbamoyltransferase, chloroplastic
NaN	2319264793396	233269062042236	NaN	translation [GO:0006412]	chloroplast [GO:0009507];chloroplast stroma [GO:0009570];chloroplast thylakoid membrane [GO:0009535];cytosolic ribosome [GO:0022626];extracellular region [GO:0005576];nucleus [GO:0005634];plastid large ribosomal subunit [GO:0000311];thylakoid [GO:0009579]	poly(U) RNA binding [GO:0008266];rRNA binding [GO:0019843];structural constituent of ribosome [GO:0003735]	3	0	7.3966	12	0	4.3	4.3	3.2	O50061	O50061	1350	RPL4	50S ribosomal protein L4, chloroplastic
305173759460449	305732593536377	304514007568359	30682107925415	formation of translation preinitiation complex [GO:0001731];positive regulation of translational fidelity [GO:0045903]	cytoplasm [GO:0005737];cytosol [GO:0005829];eukaryotic translation initiation factor 2 complex [GO:0005850];extracellular region [GO:0005576]	GTP binding [GO:0005525];GTPase activity [GO:0003924];translation initiation factor activity [GO:0003743]	34	0	233.13	448	51.4	48.2	45.2	49.9	O64490	O64490	1351	EIF2 GAMMA	Eukaryotic translation initiation factor 2 gamma subunit
300085182189941	29632251739502	301595458984375	301423625946045	defense response [GO:0006952];positive regulation of programmed cell death [GO:0043068];protein autoprocessing [GO:0016540]	cytoplasm [GO:0005737];cytosol [GO:0005829];mitochondrion [GO:0005739];plasma membrane [GO:0005886];plasmodesma [GO:0009506]	cysteine-type endopeptidase activity [GO:0004197];cysteine-type peptidase activity [GO:0008234];identical protein binding [GO:0042802]	46	0	323.31	508	41.1	41.4	35.4	29.2	O64517	O64517	1352	AMC4	Metacaspase-4
318737525939941	319285717010498	320078163146973	319173030853271	embryo development ending in seed dormancy [GO:0009793];transsulfuration [GO:0019346]	chloroplast [GO:0009507];cytosol [GO:0005829];mitochondrion [GO:0005739]	3-mercaptopyruvate sulfurtransferase activity [GO:0016784];sulfurtransferase activity [GO:0016783];thiosulfate sulfurtransferase activity [GO:0004792]	31	0	323.31	646	68.3	70.2	69.9	69.7	O64530	O64530	1354	STR1	Thiosulfate/3-mercaptopyruvate sulfurtransferase 1, mitochondrial
285185585021973	283821201324463	286762351989746	283956642150879	catabolic process [GO:0009056]		hydrolase activity [GO:0016787];methyl indole-3-acetate esterase activity [GO:0080030]	12	0	59.719	61	31	27.7	33.7	26.4	O64640	O64640	1356	CXE8	Probable carboxylesterase 8
218379211425781	NaN	217739448547363	230981884002686	response to abscisic acid [GO:0009737];response to salt stress [GO:0009651]	cytosol [GO:0005829];nucleolus [GO:0005730]		6	0	9.8419	27	10.5	0	10.5	10.5	O64644	O64644	1358	At2g45640	Histone deacetylase complex subunit SAP18
25203592300415	262097015380859	252268142700195	246203079223633	acetyl-CoA biosynthetic process from pyruvate [GO:0006086];glycolytic process [GO:0006096];pollen tube development [GO:0048868]	chloroplast envelope [GO:0009941];endoplasmic reticulum [GO:0005783]	pyruvate dehydrogenase (acetyl-transferring) activity [GO:0004739];zinc ion binding [GO:0008270]	16	0	29.051	24	15.8	13.1	16	15.8	O64688	O64688	1360	E1-BETA-2	Pyruvate dehydrogenase E1 component subunit beta-3, chloroplastic
27431734085083	271487998962402	273892784118652	274569320678711		anchored component of membrane [GO:0031225];endoplasmic reticulum [GO:0005783];plant-type cell wall [GO:0009505];plasma membrane [GO:0005886]		14	0	76.986	64	31.7	18.7	20.9	18.7	O64696	O64696	1362	At2g34510	Uncharacterized protein At2g34510
272641868591309	273306541442871	276561508178711	276812362670898	nitrogen compound metabolic process [GO:0006807];positive regulation of catalytic activity [GO:0043085]		GTP binding [GO:0005525];GTPase activity [GO:0003924];nickel cation binding [GO:0016151]	21	0	225.69	125	49.5	42.9	45.1	36	O64700	O64700	1363	UREG	Urease accessory protein G
286576156616211	287404041290283	289525756835938	29045597076416	cellular response to light stimulus [GO:0071482];peptidyl-threonine dephosphorylation [GO:0035970];thylakoid membrane organization [GO:0010027]	chloroplast [GO:0009507];chloroplast stroma [GO:0009570]	metal ion binding [GO:0046872];phosphoprotein phosphatase activity [GO:0004721]	8	0	51.298	74	22.5	25.2	25.2	25.2	O64730	O64730	1365	At2g30170	Probable protein phosphatase 2C 26
284659881591797	284557971954346	283495483398438	286370277404785	regulation of flower development [GO:0009909]	cytoplasm [GO:0005737];cytosol [GO:0005829];intracellular membrane-bounded organelle [GO:0043231];nucleus [GO:0005634]	UDP-glycosyltransferase activity [GO:0008194]	23	0	103.21	251	28.4	33.8	33.2	31.4	O64733	O64733	1366	UGT87A2	UDP-glycosyltransferase 87A2
281258335113525	281107807159424	285164566040039	26769889831543	COPII-coated vesicle budding [GO:0090114];mRNA transport [GO:0051028];protein transport [GO:0015031]	COPII vesicle coat [GO:0030127];cytosol [GO:0005829];endoplasmic reticulum [GO:0005783];Golgi membrane [GO:0000139];nuclear envelope [GO:0005635];nuclear pore [GO:0005643];nuclear pore outer ring [GO:0031080];nucleolus [GO:0005730]	structural molecule activity [GO:0005198]	29	0	323.31	271	30.1	29.8	54	22.2	O64740	O64740	1367	SEC13B	Protein transport protein SEC13 homolog B
27663158416748	278559055328369	277788143157959	277523860931396	embryo development ending in seed dormancy [GO:0009793];polar nucleus fusion [GO:0010197]	cell wall [GO:0005618];extracellular region [GO:0005576];plasmodesma [GO:0009506]	cinnamyl-alcohol dehydrogenase activity [GO:0045551];coniferyl-alcohol dehydrogenase activity [GO:0050268];FAD binding [GO:0071949];sinapyl alcohol dehydrogenase activity [GO:0052747]	23	0	97.973	164	26.1	20.3	16.5	17.3	O64743	O64743	1368	MEE23	Berberine bridge enzyme-like 15
297761650085449	296138610839844	29641185760498	296098346710205	response to jasmonic acid [GO:0009753];response to wounding [GO:0009611]	cell wall [GO:0005618];extracellular region [GO:0005576]	FAD binding [GO:0071949];oxidoreductase activity [GO:0016491]	28	0	65.878	236	41.1	27.8	31.5	27.8	O64745	O64745	1369	At2g34810	Berberine bridge enzyme-like 16
277945156097412	278053817749023	2799534034729	282227382659912	defense response to fungus [GO:0050832];response to oomycetes [GO:0002239]	cell wall [GO:0005618]		19	0	94.03	121	23.4	11.9	20.3	16.4	O64757	O64757	1370	At2g34930	Disease resistance family protein / LRR family protein
227191886901855	224002819061279	223994998931885	224364681243896		cytosol [GO:0005829];eukaryotic translation initiation factor 2B complex [GO:0005851]	guanyl-nucleotide exchange factor activity [GO:0005085];nucleotidyltransferase activity [GO:0016779];translation initiation factor activity [GO:0003743];translation initiation factor binding [GO:0031369]	24	0	96.425	90	4.7	3.4	1.6	3	O64760	O64760	1371	At2g34970	At2g34970
28055534362793	279744873046875	279645519256592	280252227783203		cytosol [GO:0005829];endoplasmic reticulum [GO:0005783];mitochondrial matrix [GO:0005759];mitochondrion [GO:0005739]	oxidoreductase activity, acting on a sulfur group of donors, disulfide as acceptor [GO:0016671]	10	0	17.724	113	27.8	41.2	23.2	39.2	O64764	O64764	1372	At2g35010	Thioredoxin O1, mitochondrial
267220802307129	268639602661133	269451427459717	268280830383301	embryo development ending in seed dormancy [GO:0009793];embryo sac development [GO:0009553];pollen development [GO:0009555];UDP-glucose metabolic process [GO:0006011];UDP-N-acetylgalactosamine metabolic process [GO:0019276];UDP-N-acetylglucosamine biosynthetic process [GO:0006048];UDP-N-acetylglucosamine metabolic process [GO:0006047]	cytoplasm [GO:0005737]	UDP-N-acetylgalactosamine diphosphorylase activity [GO:0052630];UDP-N-acetylglucosamine diphosphorylase activity [GO:0003977];uridylyltransferase activity [GO:0070569];UTP:glucose-1-phosphate uridylyltransferase activity [GO:0003983]	18	0	33.271	42	26.9	30.7	33.5	28.1	O64765	O64765	1373	GLCNAC1PUT2	UDP-N-acetylglucosamine diphosphorylase 2
323207168579102	324409217834473	323784446716309	324521636962891	purine nucleotide biosynthetic process [GO:0006164]		IMP cyclohydrolase activity [GO:0003937];phosphoribosylaminoimidazolecarboxamide formyltransferase activity [GO:0004643]	56	0	323.31	1128	78.5	82.8	76	79.3	O64767	O64767	1374	At2g35040	AICARFT/IMPCHase bienzyme family protein
267522583007813	266994876861572	269215030670166	271604843139648	signal transduction [GO:0007165]	cytoplasm [GO:0005737]	ATP binding [GO:0005524];protein kinase activity [GO:0004672];protein serine/threonine/tyrosine kinase activity [GO:0004712]	21	0	23.64	88	6.4	7	6.4	7.6	O64768	O64768	1375	At2g35050	Kinase superfamily with octicosapeptide/Phox/Bem1p domain-containing protein
265172214508057	268756065368652	264413757324219	259236335754395	secondary metabolic process [GO:0019748]	extracellular region [GO:0005576]	serine-type carboxypeptidase activity [GO:0004185];transferase activity, transferring acyl groups other than amino-acyl groups [GO:0016747]	13	0	23.529	25	18.1	28.1	22.9	24	O64810	O64810	1377	SCPL10	Serine carboxypeptidase-like 10
254904479980469	257449131011963	257184009552002	257501888275146	secondary metabolic process [GO:0019748]	extracellular region [GO:0005576]	serine-type carboxypeptidase activity [GO:0004185];sinapoylglucose-sinapoylglucose O-sinapoyltransferase activity [GO:0047158];transferase activity, transferring acyl groups other than amino-acyl groups [GO:0016747]	6	0	7.21	25	11.7	15.1	15.1	11.7	O64811	O64811	1378	SCPL9	Serine carboxypeptidase-like 9
254043807983398	245893230438232	2479931640625	248733329772949	cellular response to abscisic acid stimulus [GO:0071215];chloroplast-nucleus signaling pathway [GO:0010019];negative regulation of seed germination [GO:0010187];peptidyl-serine phosphorylation [GO:0018105];peptidyl-threonine phosphorylation [GO:0018107];regulation of cell cycle [GO:0051726];regulation of growth [GO:0040008];regulation of photoperiodism, flowering [GO:2000028]	chloroplast [GO:0009507];cytosol [GO:0005829];nucleus [GO:0005634];protein kinase CK2 complex [GO:0005956]	ATP binding [GO:0005524];kinase activity [GO:0016301];protein serine/threonine kinase activity [GO:0004674]	13	0	4.6855	15	17.4	16.2	15	14.4	O64816	O64816	1379	CKA4	Casein kinase II subunit alpha-4, chloroplastic
233938827514648	239991207122803	243364028930664	NaN				1	0.00019139	2.7833	4	2.7	2.7	2.7	0	O64856	O64856	1382	At2g44210	At2g44210/F4I1.2
241327323913574	239481544494629	238714542388916	242932662963867	lipid transport [GO:0006869]	anchored component of membrane [GO:0031225];cytosol [GO:0005829];integral component of membrane [GO:0016021];plasma membrane [GO:0005886]	lipid binding [GO:0008289]	1	0.002037	2.1922	14	5.4	5.4	5.4	5.4	O64865	O64865	1385	AtXYP10	At2g44300
255389575958252	261023139953613	256875514984131	260939598083496		cytosol [GO:0005829]	calcium ion binding [GO:0005509]	3	0	5.444	16	7.7	7.7	17.6	17.6	O64866	O64866	1386	At2g44310	Calcium-binding EF-hand family protein
282685661315918	282726650238037	282907466888428	283690299987793	carbohydrate metabolic process [GO:0005975];defense response by callose deposition in cell wall [GO:0052544];defense response to bacterium [GO:0042742];defense response to fungus, incompatible interaction [GO:0009817];glucosinolate catabolic process [GO:0019762];glucosinolate metabolic process [GO:0019760];indole glucosinolate catabolic process [GO:0042344];induced systemic resistance [GO:0009682…	chloroplast envelope [GO:0009941];membrane [GO:0016020];peroxisome [GO:0005777]	beta-glucosidase activity [GO:0008422];scopolin beta-glucosidase activity [GO:0102483];thioglucosidase activity [GO:0019137]	23	0	116.61	176	24.3	25.5	24.3	22.9	O64883	O64883	1388	BGLU26	Beta-glucosidase 26, peroxisomal
322095527648926	321451873779297	322334060668945	320190658569336	auxin-activated signaling pathway [GO:0009734];CTP biosynthetic process [GO:0006241];GTP biosynthetic process [GO:0006183];purine nucleotide metabolic process [GO:0006163];pyrimidine nucleotide metabolic process [GO:0006220];red, far-red light phototransduction [GO:0009585];response to hydrogen peroxide [GO:0042542];response to UV [GO:0009411];UTP biosynthetic process [GO:0006228]	chloroplast [GO:0009507];chloroplast envelope [GO:0009941];chloroplast stroma [GO:0009570];cytoplasm [GO:0005737];nucleus [GO:0005634];plastid [GO:0009536];thylakoid [GO:0009579]	ATP binding [GO:0005524];metal ion binding [GO:0046872];nucleoside diphosphate kinase activity [GO:0004550]	23	0	226.03	331	42.4	45	45	45	O64903	O64903	1390	NDPK2	Nucleoside diphosphate kinase II, chloroplastic
300027637481689	29768440246582	301335697174072	299918594360352	protein modification by small protein conjugation [GO:0032446];protein neddylation [GO:0045116]	cytoplasm [GO:0005737];cytosol [GO:0005829];nucleus [GO:0005634]	ATP binding [GO:0005524];NEDD8 activating enzyme activity [GO:0019781];protein heterodimerization activity [GO:0046982]	32	0	136.56	402	50	43.2	41	42.5	O65041	O65041	1392	ECR1	NEDD8-activating enzyme E1 catalytic subunit
213215198516846	222223472595215	NaN	216841888427734	fatty acid beta-oxidation [GO:0006635];fatty acid beta-oxidation using acyl-CoA oxidase [GO:0033540];lipid homeostasis [GO:0055088];long-chain fatty acid metabolic process [GO:0001676]	peroxisome [GO:0005777]	acyl-CoA oxidase activity [GO:0003997];FAD binding [GO:0071949];fatty acid binding [GO:0005504];flavin adenine dinucleotide binding [GO:0050660]	28	0	63.177	92	1.7	2.3	0	1	O65201	O65201	1393	ACX2	Acyl-coenzyme A oxidase 2, peroxisomal
307571640014648	306945323944092	307051200866699	308282794952393	fatty acid beta-oxidation [GO:0006635];fatty acid beta-oxidation using acyl-CoA oxidase [GO:0033540];jasmonic acid biosynthetic process [GO:0009695];lipid homeostasis [GO:0055088];long-chain fatty acid metabolic process [GO:0001676];response to cadmium ion [GO:0046686];response to fungus [GO:0009620];response to wounding [GO:0009611]	cytosol [GO:0005829];peroxisome [GO:0005777];plasmodesma [GO:0009506]	acyl-CoA oxidase activity [GO:0003997];FAD binding [GO:0071949];fatty acid binding [GO:0005504];flavin adenine dinucleotide binding [GO:0050660]	48	0	323.31	613	52.1	45.8	42.8	41.1	O65202	O65202	1394	ACX1	Peroxisomal acyl-coenzyme A oxidase 1
30927547454834	307657241821289	308715877532959	308311519622803	polysaccharide catabolic process [GO:0000272]	chloroplast [GO:0009507];chloroplast stroma [GO:0009570]	amylopectin maltohydrolase activity [GO:0102229];beta-amylase activity [GO:0016161]	33	0	323.31	358	49.3	47.6	50.9	50.2	O65258	O65258	1395	BAM2	Beta-amylase 2, chloroplastic
298301696777344	298944206237793	298435153961182	29937614440918	one-carbon metabolic process [GO:0006730];photorespiration [GO:0009853];tetrahydrofolate interconversion [GO:0035999]	chloroplast [GO:0009507];cytosol [GO:0005829]	methenyltetrahydrofolate cyclohydrolase activity [GO:0004477];methylenetetrahydrofolate dehydrogenase (NADP+) activity [GO:0004488]	20	0	186.33	308	45.8	48.6	64.4	54.2	O65271	O65271	1396	FOLD4	Bifunctional protein FolD 4, chloroplastic
337574234008789	335939025878906	337397270202637	336887512207031	chaperone cofactor-dependent protein refolding [GO:0051085];negative regulation of abscisic acid-activated signaling pathway [GO:0009788];positive regulation of superoxide dismutase activity [GO:1901671];protein heterotetramerization [GO:0051290];response to cadmium ion [GO:0046686];response to cold [GO:0009409]	apoplast [GO:0048046];chloroplast [GO:0009507];chloroplast envelope [GO:0009941];chloroplast stroma [GO:0009570];chloroplast thylakoid membrane [GO:0009535];mitochondrial matrix [GO:0005759];mitochondrion [GO:0005739];plastid [GO:0009536];thylakoid [GO:0009579]	ATP binding [GO:0005524];chaperone binding [GO:0051087];copper ion binding [GO:0005507];metal ion binding [GO:0046872];unfolded protein binding [GO:0051082]	42	0	323.31	927	73.1	73.1	73.1	73.1	O65282;REV__Q9C7N2	O65282	1397	CPN20	20 kDa chaperonin, chloroplastic
320101852416992	319185829162598	319852561950684	321324653625488	mucilage extrusion from seed coat [GO:0080001];mucilage metabolic process involved in seed coat development [GO:0048359];seed coat development [GO:0010214]	apoplast [GO:0048046];cell wall [GO:0005618];extracellular region [GO:0005576];secretory vesicle [GO:0099503]	serine-type endopeptidase activity [GO:0004252]	31	0	323.31	599	44.8	43.1	46	44.5	O65351	O65351	1398	SBT1.7	Subtilisin-like protease SBT1.7
285149898529053	289162998199463	287009105682373	290745182037354	cellular response to fatty acid [GO:0071398];defense response [GO:0006952];ethylene biosynthetic process [GO:0009693]	cytosol [GO:0005829]	1-aminocyclopropane-1-carboxylate oxidase activity [GO:0009815];dioxygenase activity [GO:0051213];L-ascorbic acid binding [GO:0031418];metal ion binding [GO:0046872]	5	0	214.63	53	9.7	12.2	12.2	12.2	O65378	O65378	1401	At1g12010	1-aminocyclopropane-1-carboxylate oxidase 3
337003746032715	335877685546875	336551246643066	336559753417969	methylglyoxal catabolic process to D-lactate via S-lactoyl-glutathione [GO:0019243];response to cadmium ion [GO:0046686]	chloroplast envelope [GO:0009941];cytoplasm [GO:0005737];cytosol [GO:0005829];extracellular region [GO:0005576];peroxisome [GO:0005777];plasma membrane [GO:0005886];secretory vesicle [GO:0099503];vacuole [GO:0005773]	dioxygenase activity [GO:0051213];lactoylglutathione lyase activity [GO:0004462];metal ion binding [GO:0046872]	37	0	323.31	902	65.7	63.6	64.7	61.5	O65398	O65398	1402	GLX1	Lactoylglutathione lyase GLX1
26973445892334	272913188934326	275850582122803	276626834869385	carbohydrate metabolic process [GO:0005975];defense response [GO:0006952]	anchored component of plasma membrane [GO:0046658];extracellular region [GO:0005576]	glucan endo-1,3-beta-D-glucosidase activity [GO:0042973]	5	0	22.013	32	9	7.6	7.6	11.2	O65399	O65399	1403	At1g11820	Glucan endo-1,3-beta-glucosidase 1
315836963653564	315645179748535	315668334960938	3159543800354		cytosol [GO:0005829]	oxidoreductase activity [GO:0016491]	27	0	316.76	500	67.7	65.8	66.5	71.7	O65423	O65423	1406	F18E5.200	AT4g21580/F18E5_200
293160934448242	29197135925293	29121862411499	290992374420166	iron ion homeostasis [GO:0055072];iron ion transport [GO:0006826]	plasma membrane [GO:0005886];plasmodesma [GO:0009506]	copper ion binding [GO:0005507];ferroxidase activity [GO:0004322]	13	0	71.558	144	28.1	28.1	28.1	26.2	O65449	O65449	1408	sks4	At4g22010
302015132904053	305531635284424	303220596313477	303779277801514	programmed cell death [GO:0012501];response to salicylic acid [GO:0009751];systemic acquired resistance [GO:0009627]	apoplast [GO:0048046];secretory vesicle [GO:0099503]		7	0	169.8	82	29.4	24.9	32.8	29.4	O65469	O65469	1409	CRK9	Putative cysteine-rich receptor-like protein kinase 9
248725337982178	250204734802246	249983043670654	240579624176025	programmed cell death involved in cell development [GO:0010623];proteolysis involved in cellular protein catabolic process [GO:0051603]	extracellular space [GO:0005615];lysosome [GO:0005764];nucleus [GO:0005634];plant-type vacuole [GO:0000325];plasma membrane [GO:0005886]	cysteine-type endopeptidase activity [GO:0004197]	7	0	33.144	29	8.5	6.2	6.8	2.3	O65493	O65493	1410	XCP1	Cysteine protease XCP1
261055164337158	263346138000488	269202537536621	NaN	photosystem II assembly [GO:0010207]	chloroplast [GO:0009507];chloroplast stroma [GO:0009570];chloroplast thylakoid [GO:0009534];chloroplast thylakoid membrane [GO:0009535];photosystem II [GO:0009523];plasma membrane [GO:0005886];thylakoid membrane [GO:0042651]	translation initiation factor activity [GO:0003743]	4	0	7.49	11	2	2	2	0	O65502	O65502	1411	HCF244	Protein HIGH CHLOROPHYLL FLUORESCENCE PHENOTYPE 244, chloroplastic
266286754608154	265419139862061	266102046966553	25060604095459	signal transduction [GO:0007165]	integral component of membrane [GO:0016021]	ADP binding [GO:0043531]	2	0.0062724	1.6946	11	1.4	1.4	1.4	1.4	O65507	O65507	1412	At4g36150	Disease resistance protein (TIR-NBS-LRR class) family
319599933624268	319392261505127	320093841552734	320230369567871	actin filament capping [GO:0051693];actin filament depolymerization [GO:0030042];actin filament organization [GO:0007015];actin filament severing [GO:0051014];actin polymerization or depolymerization [GO:0008154];cytoplasmic streaming [GO:0099636];response to abscisic acid [GO:0009737];root hair elongation [GO:0048767]	actin cytoskeleton [GO:0015629];cytoplasm [GO:0005737];cytosol [GO:0005829];plasma membrane [GO:0005886]	actin filament binding [GO:0051015]	87	0	323.31	1043	54.2	52.7	54.5	49.3	O65570	O65570	1414	VLN4	Villin-4
NaN	235089378356934	234507331848145	23764965057373	carotene catabolic process [GO:0016121];carotenoid catabolic process [GO:0016118];xanthophyll catabolic process [GO:0016124]	chloroplast [GO:0009507];chloroplast stroma [GO:0009570];cytoplasm [GO:0005737];cytosol [GO:0005829];Golgi apparatus [GO:0005794];plasma membrane [GO:0005886];plasmodesma [GO:0009506];vacuolar membrane [GO:0005774];vacuole [GO:0005773]	9-cis-epoxycarotenoid dioxygenase activity [GO:0045549];carotenoid dioxygenase activity [GO:0010436];metal ion binding [GO:0046872]	2	0.00094251	2.5206	7	0	3.5	2.2	2.2	O65572	O65572	1415	CCD1	Carotenoid 9,10(9',10')-cleavage dioxygenase 1
342627639770508	342793273925781	341783828735352	342505340576172	fructose 1,6-bisphosphate metabolic process [GO:0030388];gluconeogenesis [GO:0006094];glycolytic process [GO:0006096]	cytosol [GO:0005829]	fructose-bisphosphate aldolase activity [GO:0004332]	49	0	323.31	1159	89.7	83.8	79.6	79.6	O65581	O65581	1416	FBA5	Fructose-bisphosphate aldolase 5, cytosolic
297005634307861	298724555969238	296986446380615	299517154693604	cold acclimation [GO:0009631];DNA duplex unwinding [GO:0032508];response to cold [GO:0009409];response to salt stress [GO:0009651];response to water deprivation [GO:0009414];RNA secondary structure unwinding [GO:0010501]	cytoplasm [GO:0005737];nucleus [GO:0005634];plasma membrane [GO:0005886]	double-stranded DNA binding [GO:0003690];mRNA binding [GO:0003729];nucleic acid binding [GO:0003676];RNA binding [GO:0003723];single-stranded DNA binding [GO:0003697];zinc ion binding [GO:0008270]	20	0	323.31	353	60.9	54.5	59.9	67.2	O65639;A0A1P8B8F3	O65639	1420	CSP1;CSDP1	Cold shock protein 1;Cold shock domain protein 1
NaN	241583862304688	246011619567871	NaN	regulation of growth [GO:0040008];response to cold [GO:0009409];response to salt stress [GO:0009651];response to water deprivation [GO:0009414]	chloroplast thylakoid membrane [GO:0009535];endoplasmic reticulum [GO:0005783];plasma membrane [GO:0005886];plastoglobule [GO:0010287];secretory vesicle [GO:0099503];thylakoid [GO:0009579];vacuolar membrane [GO:0005774];vacuole [GO:0005773]	catalase activity [GO:0004096];heme binding [GO:0020037]	6	0	114.14	54	0	8.8	8.8	0	O65660	O65660	1422	PLAT1	PLAT domain-containing protein 1
26830623626709	269609107971191	26887508392334	269819622039795	positive regulation of leaf senescence [GO:1900057];response to hydroperoxide [GO:0033194]		pinoresinol reductase activity [GO:0010283]	9	0	11.361	38	24.2	27.1	17.6	20.9	O65679	O65679	1423	PLR3	Probable pinoresinol-lariciresinol reductase 3
248731918334961	252967357635498	244939937591553	249743881225586	ribosome biogenesis [GO:0042254];rRNA processing [GO:0006364]	chloroplast [GO:0009507]	ribosomal small subunit binding [GO:0043024]	3	0.00019223	2.8374	19	7.4	3.3	16.3	19.5	O65693	O65693	1424	At4g34730	Probable ribosome-binding factor A, chloroplastic
343809089660645	343675003051758	343273696899414	342849235534668	cellular response to unfolded protein [GO:0034620];chaperone cofactor-dependent protein refolding [GO:0051085];protein refolding [GO:0042026];response to cadmium ion [GO:0046686];response to heat [GO:0009408];response to karrikin [GO:0080167];response to unfolded protein [GO:0006986];response to virus [GO:0009615]	apoplast [GO:0048046];cell wall [GO:0005618];chloroplast [GO:0009507];cytoplasm [GO:0005737];cytosol [GO:0005829];cytosolic ribosome [GO:0022626];Golgi apparatus [GO:0005794];nuclear matrix [GO:0016363];plasma membrane [GO:0005886];plasmodesma [GO:0009506];vacuolar membrane [GO:0005774];vacuole [GO:0005773]	ATP binding [GO:0005524];ATPase activity [GO:0016887];heat shock protein binding [GO:0031072];misfolded protein binding [GO:0051787];protease binding [GO:0002020];protein folding chaperone [GO:0044183];unfolded protein binding [GO:0051082]	85	0	323.31	1322	81.8	81.7	81.8	77.3	O65719	O65719	1425	HSP70-3	Heat shock 70 kDa protein 3
286633281707764	289188899993896	287726287841797	288644924163818	cytidine catabolic process [GO:0006216];cytidine deamination [GO:0009972]	cytosol [GO:0005829];mitochondrion [GO:0005739]	cytidine deaminase activity [GO:0004126];deoxycytidine deaminase activity [GO:0047844];protein homodimerization activity [GO:0042803];zinc ion binding [GO:0008270]	23	0	285.25	222	27.2	38.9	38.5	49.2	O65896	O65896	1426	CDA1	Cytidine deaminase 1
316438808441162	317280941009521	317473526000977	31717716217041	actin cytoskeleton organization [GO:0030036];actin polymerization or depolymerization [GO:0008154];cell morphogenesis [GO:0000902];establishment or maintenance of cell polarity [GO:0007163];regulation of adenylate cyclase activity [GO:0045761];unidimensional cell growth [GO:0009826]	cortical actin cytoskeleton [GO:0030864];cytosol [GO:0005829]	actin binding [GO:0003779];adenylate cyclase binding [GO:0008179]	64	0	323.31	802	83	65.8	78.2	74.2	O65902	O65902	1427	CAP1	Cyclase-associated protein 1
342297019958496	341830520629883	341932220458984	343794250488281	cellular response to light intensity [GO:0071484];cellular response to oxidative stress [GO:0034599];cellular response to ozone [GO:0071457];cellular response to salt stress [GO:0071472];cellular response to sucrose stimulus [GO:0071329];cellular response to UV-B [GO:0071493];gene silencing by miRNA [GO:0035195];removal of superoxide radicals [GO:0019430];response to copper ion [GO:0046688];respo…	apoplast [GO:0048046];chloroplast [GO:0009507];chloroplast stroma [GO:0009570];extracellular region [GO:0005576];extracellular space [GO:0005615];thylakoid [GO:0009579]	copper ion binding [GO:0005507];superoxide dismutase activity [GO:0004784]	11	0	323.31	532	69.9	69.9	69.9	69.9	O78310	O78310	1428	CSD2	Superoxide dismutase [Cu-Zn] 2, chloroplastic
266073837280273	267605304718018	2663796043396	26338888168335	cell cycle [GO:0007049];cell division [GO:0051301];maintenance of root meristem identity [GO:0010078];positive regulation of transcription by RNA polymerase II [GO:0045944];protein phosphorylation [GO:0006468];regulation of cyclin-dependent protein serine/threonine kinase activity [GO:0000079]	cytoplasm [GO:0005737];cytosol [GO:0005829];nucleus [GO:0005634];transcription factor TFIIK complex [GO:0070985]	ATP binding [GO:0005524];cyclin-dependent protein serine/threonine kinase activity [GO:0004693];protein serine/threonine kinase activity [GO:0004674];RNA polymerase II CTD heptapeptide repeat kinase activity [GO:0008353]	10	0	35.888	65	9.8	6.3	7.7	8.6	O80345	O80345	1429	CDKF-1	Cyclin-dependent kinase F-1
272003211975098	264596405029297	263780899047852	276497936248779	anthocyanin-containing compound biosynthetic process [GO:0009718];chlorophyll biosynthetic process [GO:0015995];positive regulation of transcription, DNA-templated [GO:0045893];response to light stimulus [GO:0009416]	nucleus [GO:0005634];plasma membrane [GO:0005886]		10	0	14.275	25	4.3	3.5	3.5	4.3	O80386	O80386	1430	CIP7	COP1-interacting protein 7
318070487976074	319084186553955	317627964019775	319285717010498	cellular amino acid metabolic process [GO:0006520];pyridoxal phosphate biosynthetic process [GO:0042823];pyridoxine biosynthetic process [GO:0008615]	chloroplast [GO:0009507];cytosol [GO:0005829];endoplasmic reticulum [GO:0005783]	amine-lyase activity [GO:0016843];protein heterodimerization activity [GO:0046982];pyridoxal 5'-phosphate synthase (glutamine hydrolysing) activity [GO:0036381]	26	0	323.31	394	52.1	48.9	53.4	48.9	O80448	O80448	1433	PDX11	Pyridoxal 5'-phosphate synthase subunit PDX1.1
241403980255127	240498447418213	244452495574951	241683673858643				2	0.0014886	2.293	7	2.1	2.1	2.1	2.1	O80456	O80456	1436	At2g23390	Acyl-CoA
325954818725586	325241889953613	326384963989258	326362724304199	jasmonic acid metabolic process [GO:0009694];nicotinate metabolic process [GO:1901847];salicylic acid metabolic process [GO:0009696]	cytosol [GO:0005829];vacuole [GO:0005773]	carboxylic ester hydrolase activity [GO:0052689];hydrolase activity [GO:0016787];hydrolase activity, acting on ester bonds [GO:0016788];methyl indole-3-acetate esterase activity [GO:0080030];methyl jasmonate esterase activity [GO:0080032];methyl salicylate esterase activity [GO:0080031]	20	0	323.31	470	70	70	68.4	70	O80476	O80476	1440	MES2	Methylesterase 2
295978984832764	295856494903564	295446758270264	294049701690674	jasmonic acid metabolic process [GO:0009694];salicylic acid metabolic process [GO:0009696]	vacuole [GO:0005773]	hydrolase activity [GO:0016787];hydrolase activity, acting on ester bonds [GO:0016788];methyl indole-3-acetate esterase activity [GO:0080030];methyl jasmonate esterase activity [GO:0080032];methyl salicylate esterase activity [GO:0080031]	16	0	88.513	182	51	48.7	47.1	45.2	O80477	O80477	1441	MES3	Methylesterase 3
290060043334961	292321491241455	291239356994629	292128963470459	host response to induction by symbiont of tumor, nodule or growth in host [GO:0080034];NLS-bearing protein import into nucleus [GO:0006607];symbiont intracellular protein transport in host [GO:0030581]	cytosol [GO:0005829];host cell nucleus [GO:0042025];nuclear envelope [GO:0005635];nucleus [GO:0005634]	nuclear import signal receptor activity [GO:0061608];nuclear localization sequence binding [GO:0008139]	34	0	323.31	288	46.7	22.5	31.6	31.6	O80480	O80480	1442	IMPA4	Importin subunit alpha-4
260610160827637	258982982635498	261913871765137	253531951904297	exocytosis [GO:0006887];intracellular protein transport [GO:0006886];intra-Golgi vesicle-mediated transport [GO:0006891];plant-type cell wall cellulose biosynthetic process [GO:0052324];Rab protein signal transduction [GO:0032482];regulation of cell growth [GO:0001558];retrograde transport, endosome to Golgi [GO:0042147];retrograde vesicle-mediated transport, Golgi to endoplasmic reticulum [GO:00…	cytosol [GO:0005829];endomembrane system [GO:0012505];endosome [GO:0005768];Golgi apparatus [GO:0005794];Golgi membrane [GO:0000139];membrane [GO:0016020];plasma membrane [GO:0005886];plasmodesma [GO:0009506];trans-Golgi network [GO:0005802];vacuolar membrane [GO:0005774]	GTP binding [GO:0005525];GTPase activity [GO:0003924]	6	0	19.962	38	11.1	5.8	5.8	5.8	O80501	O80501	1444	RABH1B	Ras-related protein RABH1b
304747943878174	304662609100342	2980784034729	298587837219238	chaperone cofactor-dependent protein refolding [GO:0051085];protein folding [GO:0006457]	chloroplast [GO:0009507];chloroplast envelope [GO:0009941];chloroplast stroma [GO:0009570];cytosol [GO:0005829];mitochondrial matrix [GO:0005759];plastid [GO:0009536]	chaperone binding [GO:0051087];metal ion binding [GO:0046872];protein domain specific binding [GO:0019904];unfolded protein binding [GO:0051082]	13	0	323.31	166	64.7	66.9	64	64	O80504	O80504	1445	CPN10-2	10 kDa chaperonin 2, chloroplastic
280316524505615	279147911071777	277791271209717	277520027160645		anchored component of membrane [GO:0031225];anchored component of plasma membrane [GO:0046658];plasmodesma [GO:0009506]	electron transfer activity [GO:0009055];metal ion binding [GO:0046872]	9	0	258.88	151	28.2	30.2	28.2	20.3	O80517	O80517	1447	At2g44790	Uclacyanin-2
260227603912354	260041465759277	262566318511963	265554637908936	lipid catabolic process [GO:0016042]	chloroplast stroma [GO:0009570];extracellular region [GO:0005576]	hydrolase activity, acting on ester bonds [GO:0016788]	8	0	13.602	25	14.6	12.2	16.5	15.1	O80522	O80522	1448	At1g09390	GDSL esterase/lipase At1g09390
30655912399292	306908740997314	30665599822998	306675472259521	acetyl-CoA biosynthetic process [GO:0006085];lipid metabolic process [GO:0006629]	citrate lyase complex [GO:0009346];cytosol [GO:0005829];extracellular region [GO:0005576]	ATP binding [GO:0005524];ATP citrate synthase activity [GO:0003878]	37	0	323.31	523	57.8	57.8	57.8	55.7	O80526	O80526	1449	ACLA-3	ATP-citrate synthase alpha chain protein 3
289577598571777	2928515625	292708168029785	28904806137085		secretory vesicle [GO:0099503]	alcohol dehydrogenase (NAD+) activity [GO:0004022];oxidoreductase activity [GO:0016491];oxidoreductase activity, acting on the CH-OH group of donors, NAD or NADP as acceptor [GO:0016616]	16	0	74.708	122	30.4	29.8	28.3	23	O80532;Q5PP57	O80532	1450	At1g09490	At1g09490/F14J9_15
246483955383301	251461601257324	248431644439697	243093872070313	methylation [GO:0032259]	mitochondrion [GO:0005739]	methyltransferase activity [GO:0008168]	5	0	6.7843	25	2.3	4.8	2.3	5.1	O80543	O80543	1452	At1g22800	Putative methyltransferase At1g22800, mitochondrial
NaN	263554821014404	NaN	298761920928955	negative regulation of transcription, DNA-templated [GO:0045892];regulation of translation [GO:0006417];response to absence of light [GO:0009646];response to carbon starvation [GO:0090549]	cytosol [GO:0005829];nucleus [GO:0005634]	ribosome binding [GO:0043022]	9	0	7.3512	25	0	2	1.6	4.5	O80548	O80548	1453	MRF2	MA3 DOMAIN-CONTAINING TRANSLATION REGULATORY FACTOR 2
249530925750732	247488842010498	251656875610352	253285846710205	methylation [GO:0032259]	cytosol [GO:0005829]	thiol S-methyltransferase activity [GO:0018708]	4	0	6.8148	24	9.7	9.7	9.7	9.7	O80562	O80562	1454	HOL2	Probable thiol methyltransferase 1
238925437927246	263156700134277	252855262756348	262500839233398	RNA processing [GO:0006396]	nucleus [GO:0005634];ribonucleoprotein complex [GO:1990904]	mRNA binding [GO:0003729]	14	0	31.021	59	4.4	15.8	12.7	16.3	O80567	O80567	1455	LARP6B	La-related protein 6B
264034061431885	253349380493164	257277774810791	268061199188232	inositol trisphosphate metabolic process [GO:0032957];myo-inositol hexakisphosphate biosynthetic process [GO:0010264]	cytosol [GO:0005829]	ATP binding [GO:0005524];inositol tetrakisphosphate 1-kinase activity [GO:0047325];inositol-1,3,4-trisphosphate 5-kinase activity [GO:0052726];inositol-1,3,4-trisphosphate 6-kinase activity [GO:0052725];magnesium ion binding [GO:0000287]	14	0	53.717	53	13.3	5.9	13.3	17.6	O80568	O80568	1456	ITPK4	Inositol 1,3,4-trisphosphate 5/6-kinase 4
306530094146729	305708179473877	306325283050537	306915397644043	diaminopimelate biosynthetic process [GO:0019877];lysine biosynthetic process via diaminopimelate [GO:0009089]	chloroplast [GO:0009507];chloroplast stroma [GO:0009570];cytosol [GO:0005829]	4-hydroxy-tetrahydrodipicolinate reductase [GO:0008839];NADPH binding [GO:0070402]	19	0	258.41	222	38.6	51	52.2	42.4	O80574	O80574	1457	DAPB1	4-hydroxy-tetrahydrodipicolinate reductase 1, chloroplastic
270515480041504	268660850524902	27187068939209	258379783630371	riboflavin biosynthetic process [GO:0009231]	chloroplast [GO:0009507];chloroplast stroma [GO:0009570];riboflavin synthase complex [GO:0009349]	6,7-dimethyl-8-ribityllumazine synthase activity [GO:0000906]	7	0	36.357	87	23.3	21.6	26.9	19.8	O80575	O80575	1458	At2g44050	6,7-dimethyl-8-ribityllumazine synthase, chloroplastic
255323429107666	25769006729126	254835453033447	254377136230469	response to cadmium ion [GO:0046686];response to desiccation [GO:0009269]	cytosol [GO:0005829];Golgi apparatus [GO:0005794];plasma membrane [GO:0005886];plasmodesma [GO:0009506]		42	0	323.31	362	2.2	5.2	6.8	5.2	O80576	O80576	1459	late embryogenesis abundant 26	At2g44060
323227844238281	322917556762695	323441123962402	323526611328125	methionine biosynthetic process [GO:0009086];one-carbon metabolic process [GO:0006730];tetrahydrofolate interconversion [GO:0035999]	cytosol [GO:0005829]	FAD binding [GO:0071949];methylenetetrahydrofolate reductase (NAD(P)H) activity [GO:0004489]	59	0	323.31	1024	85.4	77.3	85	75.4	O80585	O80585	1460	MTHFR2	Methylenetetrahydrofolate reductase 2
NaN	23612455368042	235711479187012	234536247253418	cell death [GO:0008219];defense response [GO:0006952];ethylene biosynthetic process [GO:0009693];leaf senescence [GO:0010150]	nucleus [GO:0005634]	RNA binding [GO:0003723]	9	0.0013074	2.3315	14	5.5	8.6	8.6	8.6	O80678	O80678	1466	UBA2B	UBP1-associated protein 2B
285261535644531	NaN	239237937927246	NaN	carbohydrate metabolic process [GO:0005975];lignin biosynthetic process [GO:0009809]		beta-glucosidase activity [GO:0008422];coniferin beta-glucosidase activity [GO:0047782];scopolin beta-glucosidase activity [GO:0102483]	39	0	323.31	167	2.1	0	4.5	0	O80690	O80690	1467	BGLU46	Beta-glucosidase 46
287851905822754	289028816223145	286572418212891	283391761779785	defense response to bacterium [GO:0042742];plant-type hypersensitive response [GO:0009626]		oxidoreductase activity [GO:0016491]	18	0	82.607	171	44	38.1	25.7	28.8	O80713	O80713	1469	SDR3a	Short-chain dehydrogenase reductase 3a
297685661315918	297957401275635	298216648101807	298794250488281	cell wall organization [GO:0071555]	extracellular region [GO:0005576];plant-type cell wall [GO:0009505]	carboxylic ester hydrolase activity [GO:0052689];pectin acetylesterase activity [GO:0052793]	22	0	285.02	257	58.2	48.8	61.5	57.5	O80731	O80731	1471	PAE3	Pectin acetylesterase 3
243914585113525	246260032653809	241574611663818	NaN		cytosol [GO:0005829]		16	0	39.305	81	10.4	5.1	10	0	O80734	O80734	1472	At2g46900	Expressed protein
255618572235107	25765495300293	262301349639893	268263854980469			carbohydrate binding [GO:0030246]	3	0.0084881	1.5389	9	2.3	2.3	2.3	2.3	O80735	O80735	1473	JAL16	Jacalin-related lectin 16
249770545959473	26563268661499	265336208343506	267022647857666	dephosphorylation [GO:0016311]	cytoplasm [GO:0005737];cytosol [GO:0005829]	transferase activity, transferring glycosyl groups [GO:0016757]	21	0	86.786	45	4.2	2.2	2.2	2.2	O80738	O80738	1474	TPS10	Probable alpha,alpha-trehalose-phosphate synthase [UDP-forming] 10
310586605072021	310651607513428	311211452484131	311126594543457	cell redox homeostasis [GO:0045454];pollen tube growth [GO:0009860];pollen tube guidance [GO:0010183];regulation of pollen tube growth [GO:0080092];response to cadmium ion [GO:0046686]	cytosol [GO:0005829];nucleus [GO:0005634]	protein-disulfide reductase activity [GO:0047134]	56	0	323.31	746	57.6	59.9	55.9	59.5	O80763	O80763	1475	At1g60420	Probable nucleoredoxin 1
247121410369873	NaN	248833885192871	249457893371582	oxidation-reduction process [GO:0055114]	cytosol [GO:0005829];mitochondrial matrix [GO:0005759];mitochondrion [GO:0005739];nucleus [GO:0005634];respirasome [GO:0070469]	acyl binding [GO:0000035];acyl carrier activity [GO:0000036];cobalt ion binding [GO:0050897];metal ion binding [GO:0046872]	2	0	5.5189	11	14.3	0	14.3	14.3	O80800	O80800	1478	MTACP2	Acyl carrier protein 2, mitochondrial
271475391387939	269432430267334	272914943695068	271355533599854	double fertilization forming a zygote and endosperm [GO:0009567]	cytoplasm [GO:0005737];nucleus [GO:0005634]	transferase activity, transferring acyl groups other than amino-acyl groups [GO:0016747]	12	0	12.226	47	18.7	18.9	19.8	19.8	O80816	O80816	1479	GLAUCE	HXXXD-type acyl-transferase family protein
252304096221924	255693531036377	254137706756592	257684268951416		nucleus [GO:0005634]	AT DNA binding [GO:0003680]	3	0	24.407	17	12.4	4	12.4	12.4	O80834	O80834	1480	AHL9	AT-hook motif nuclear-localized protein 9
32091724395752	320211181640625	321475563049316	322647247314453	GDP-mannose biosynthetic process [GO:0009298];L-ascorbic acid biosynthetic process [GO:0019853];mannose metabolic process [GO:0006013];protein N-linked glycosylation [GO:0006487];protein targeting to ER [GO:0045047]	cytosol [GO:0005829]	phosphomannomutase activity [GO:0004615]	32	0	323.31	616	78	78	78	76.8	O80840	O80840	1481	PMM	Phosphomannomutase
304894142150879	305883502960205	303922290802002	303981552124023	SRP-dependent cotranslational protein targeting to membrane [GO:0006614]	chloroplast stroma [GO:0009570];chloroplast thylakoid membrane [GO:0009535]	GTP binding [GO:0005525];metal ion binding [GO:0046872]	22	0	150.93	208	54.4	47.5	47.5	42.6	O80842	O80842	1482	CPFTSY	Cell division protein FtsY homolog, chloroplastic
252191524505615	NaN	249053173065186	252575664520264	tRNA methylation [GO:0030488]	nucleus [GO:0005634];tRNA (m1A) methyltransferase complex [GO:0031515]	translation initiation factor activity [GO:0003743]	16	0	100.3	62	9.4	0	2.9	7.6	O80846	O80846	1483	At2g45730	tRNA (adenine(58)-N(1))-methyltransferase non-catalytic subunit TRM6
348926124572754	348479614257813	349402160644531	350337905883789	defense response [GO:0006952];defense response to bacterium [GO:0042742];glutathione metabolic process [GO:0006749];response to cadmium ion [GO:0046686];response to zinc ion [GO:0010043];toxin catabolic process [GO:0009407]	apoplast [GO:0048046];chloroplast [GO:0009507];chloroplast stroma [GO:0009570];cytoplasm [GO:0005737];cytosol [GO:0005829];peroxisome [GO:0005777];plasma membrane [GO:0005886];plasmodesma [GO:0009506];thylakoid [GO:0009579];vacuole [GO:0005773]	copper ion binding [GO:0005507];glutathione binding [GO:0043295];glutathione peroxidase activity [GO:0004602];glutathione transferase activity [GO:0004364]	35	0	323.31	964	80	77.7	80	80	O80852	O80852	1484	GSTF9	Glutathione S-transferase F9
NaN	NaN	234563846588135	238745517730713		chloroplast [GO:0009507];peroxisome [GO:0005777];plasma membrane [GO:0005886]		10	0	202.44	45	0	0	11	11	O80858	O80858	1485	At2g30930	Expressed protein
290924987792969	29244270324707	290190048217773	292513751983643	response to zinc ion [GO:0010043]	chloroplast [GO:0009507];cytosol [GO:0005829];endoplasmic reticulum [GO:0005783]	hydrolase activity [GO:0016787];transferase activity, transferring acyl groups other than amino-acyl groups [GO:0016747]	18	0	72.341	134	51.9	40.6	44.8	56.5	O80889;A0A1P8AZM5	O80889	1486	At2g32520	Alpha/beta-Hydrolases superfamily protein
260191383361816	263849220275879	259017772674561	266532154083252	spliceosomal complex assembly [GO:0000245]	catalytic step 2 spliceosome [GO:0071013];U2 snRNP [GO:0005686];U2-type prespliceosome [GO:0071004]	nucleic acid binding [GO:0003676];zinc ion binding [GO:0008270]	12	0	76.852	73	26.4	23.5	27.1	23.5	O80897	O80897	1487	At2g32600	At2g32600/T26B15.16
288333396911621	289590320587158	292064819335938	297088394165039	signal transduction [GO:0007165]		ATP binding [GO:0005524];protein serine/threonine kinase activity [GO:0004674]	2	0.007276	1.5743	23	2.1	2.1	2.1	2.1	O80902	O80902	1488	CIPK22	CBL-interacting serine/threonine-protein kinase 22
266901912689209	273534660339355	271930999755859	277211017608643	protein transport to vacuole involved in ubiquitin-dependent protein catabolic process via the multivesicular body sorting pathway [GO:0043328]	cytoplasm [GO:0005737];early endosome [GO:0005769];early endosome membrane [GO:0031901];multivesicular body [GO:0005771];plasma membrane [GO:0005886]	ubiquitin binding [GO:0043130]	10	0	90.949	90	7.5	6.1	4.2	7.6	O80910	O80910	1489	TOL6	TOM1-like protein 6
311309947967529	3139453125	313469409942627	313465175628662	hydrogen peroxide catabolic process [GO:0042744];response to oxidative stress [GO:0006979]	extracellular region [GO:0005576];vacuole [GO:0005773]	heme binding [GO:0020037];metal ion binding [GO:0046872];peroxidase activity [GO:0004601]	15	0	182.51	77	6.3	5.2	6.3	6.3	O80912	O80912	1490	PER23	Peroxidase 23
231336574554443	246632957458496	253120899200439	252601890563965	vesicle-mediated transport [GO:0016192]	cytosol [GO:0005829];endoplasmic reticulum [GO:0005783];Golgi apparatus [GO:0005794];nucleus [GO:0005634]	GTPase activator activity [GO:0005096];metal ion binding [GO:0046872]	18	0	181.4	55	9.4	8.6	16.4	12.3	O80925	O80925	1492	AGD7	ADP-ribosylation factor GTPase-activating protein AGD7
337359008789063	336014518737793	336478538513184	336893768310547	defense response to bacterium [GO:0042742]	apoplast [GO:0048046];chloroplast [GO:0009507];chloroplast stroma [GO:0009570];endoplasmic reticulum [GO:0005783];thylakoid [GO:0009579]	copper ion binding [GO:0005507]	38	0	323.31	711	71.4	70.2	69.8	69.8	O80934	O80934	1494	At2g37660	Uncharacterized protein At2g37660, chloroplastic
265122108459473	272302265167236	268526954650879	272264652252197	defense response [GO:0006952];defense response to bacterium [GO:0042742];defense response to oomycetes [GO:0002229];response to salicylic acid [GO:0009751]	endoplasmic reticulum [GO:0005783];integral component of membrane [GO:0016021];plasma membrane [GO:0005886]	ATP binding [GO:0005524];carbohydrate binding [GO:0030246];transmembrane receptor protein serine/threonine kinase activity [GO:0004675]	6	0	5.134	14	7.1	7.4	7.1	8.3	O80939	O80939	1495	LECRK41	L-type lectin-domain containing receptor kinase IV.1
246074409484863	24248872756958	246330623626709	NaN	carbohydrate metabolic process [GO:0005975]	chloroplast [GO:0009507];Golgi apparatus [GO:0005794];integral component of membrane [GO:0016021]	acetyltransferase activity [GO:0016407]	1	0.001487	2.2814	1	2.7	2.7	2.7	0	O80940	O80940	1496	TBL15	Protein trichome birefringence-like 15
295864009857178	297318058013916	296538639068604	296322154998779	oxidation-reduction process [GO:0055114];response to cadmium ion [GO:0046686];response to cold [GO:0009409];response to salt stress [GO:0009651];response to toxic substance [GO:0009636];response to water deprivation [GO:0009414]	cytosol [GO:0005829];endoplasmic reticulum [GO:0005783]	alcohol dehydrogenase (NADP+) activity [GO:0008106];alditol:NADP+ 1-oxidoreductase activity [GO:0004032];aldo-keto reductase (NADP) activity [GO:0004033];NADP+ binding [GO:0070401];oxidoreductase activity [GO:0016491];steroid dehydrogenase activity [GO:0016229]	28	0	148.96	332	56.9	58.2	58.8	61.7	O80944	O80944	1497	AKR4C8	Aldo-keto reductase family 4 member C8
213474349975586	214511108398438	224172019958496	215520133972168			carbohydrate binding [GO:0030246]	68	0	323.31	572	12.2	19.2	13.3	10	O80950	O80950	1498	JAL22	Jacalin-related lectin 22
339167861938477	33775390625	339086685180664	338393974304199	glycine decarboxylation via glycine cleavage system [GO:0019464]	apoplast [GO:0048046];chloroplast [GO:0009507];chloroplast envelope [GO:0009941];cytosol [GO:0005829];glycine cleavage complex [GO:0005960];mitochondrion [GO:0005739];vacuole [GO:0005773]	ATP binding [GO:0005524];glycine binding [GO:0016594];glycine dehydrogenase (decarboxylating) activity [GO:0004375];pyridoxal phosphate binding [GO:0030170]	91	0	323.31	1273	62.8	66	63.4	65.8	O80988	O80988	1501	GLDP2	Glycine dehydrogenase (decarboxylating) 2, mitochondrial
272410907745361	261883716583252	268593463897705	278985633850098	iron-sulfur cluster assembly [GO:0016226]	CIA complex [GO:0097361];nucleus [GO:0005634]		14	0	43.29	49	7.7	7.1	3.1	3.1	O80990	O80990	1502	CIA1	Protein CIA1
NaN	231402416229248	229836196899414	233227863311768	abscisic acid-activated signaling pathway [GO:0009738];regulation of protein serine/threonine phosphatase activity [GO:0080163]	cytoplasm [GO:0005737];nucleus [GO:0005634];plasma membrane [GO:0005886]	abscisic acid binding [GO:0010427];identical protein binding [GO:0042802];protein homodimerization activity [GO:0042803];protein phosphatase inhibitor activity [GO:0004864];signaling receptor activity [GO:0038023]	3	0	4.2729	9	0	6.8	6.8	6.8	O80992	O80992	1503	PYL2	Abscisic acid receptor PYL2
NaN	237795658111572	246867237091064	25328857421875	regulation of seed germination [GO:0010029]	ubiquitin ligase complex [GO:0000151]	protein heterodimerization activity [GO:0046982];ubiquitin binding [GO:0043130];ubiquitin-protein transferase activity [GO:0004842];zinc ion binding [GO:0008270]	5	0	4.4788	12	0	8.4	5.2	5.2	O80996	O80996	1504	BRIZ2	BRAP2 RING ZnF UBP domain-containing protein 2
310043048858643	309848155975342	311372394561768	312136154174805	isopentenyl diphosphate biosynthetic process, methylerythritol 4-phosphate pathway [GO:0019288];terpenoid biosynthetic process [GO:0016114]	chloroplast [GO:0009507];chloroplast stroma [GO:0009570]	4-(cytidine 5'-diphospho)-2-C-methyl-D-erythritol kinase activity [GO:0050515];ATP binding [GO:0005524]	28	0	221.35	378	40.5	41.5	39.9	41.5	O81014	O81014	1509	ISPE	4-diphosphocytidyl-2-C-methyl-D-erythritol kinase, chloroplastic
27448371887207	267188186645508	273716907501221	272004146575928	phosphatidylethanolamine biosynthetic process [GO:0006646];phospholipid biosynthetic process [GO:0008654]	plasma membrane [GO:0005886]	ATP binding [GO:0005524];ethanolamine kinase activity [GO:0004305]	20	0	42.362	148	22.2	18.2	23.3	19.3	O81024	O81024	1510	EMB1187	Probable ethanolamine kinase
262169151306152	262409076690674	263450946807861	255531806945801	ketone body biosynthetic process [GO:0046951];leucine catabolic process [GO:0006552];lipid metabolic process [GO:0006629]	mitochondrial matrix [GO:0005759];mitochondrion [GO:0005739]	hydroxymethylglutaryl-CoA lyase activity [GO:0004419];metal ion binding [GO:0046872]	12	0	50.874	79	5.6	5.8	5.6	3.4	O81027	O81027	1511	HMGCL	Hydroxymethylglutaryl-CoA lyase, mitochondrial
NaN	NaN	255119552612305	250368270874023	L-ascorbic acid biosynthetic process [GO:0019853]	cell wall [GO:0005618];membrane [GO:0016020]	D-arabinono-1,4-lactone oxidase activity [GO:0003885];FAD binding [GO:0071949];L-gulonolactone oxidase activity [GO:0050105]	21	0	66.78	39	2.7	2.7	8.3	7.1	O81030	O81030	1512	GULLO5	L-gulonolactone oxidase 5
281151542663574	280657901763916	280429649353027	28024959564209	L-ascorbic acid biosynthetic process [GO:0019853]	membrane [GO:0016020]	D-arabinono-1,4-lactone oxidase activity [GO:0003885];FAD binding [GO:0071949];L-gulonolactone oxidase activity [GO:0050105]	12	0	26.397	16	4.5	2.2	4	5.5	O81032	O81032	1513	GULLO6	Probable L-gulonolactone oxidase 6
NaN	NaN	240335540771484	238937473297119		integral component of membrane [GO:0016021]	ATP binding [GO:0005524];protein serine/threonine kinase activity [GO:0004674]	3	0.0047136	1.8645	2	0	0	0.8	0.8	O81069	O81069	1515	At2g28990	Probable leucine-rich repeat receptor-like protein kinase At2g28990
248865089416504	242084369659424	237846660614014	233490829467773	mRNA cis splicing, via spliceosome [GO:0045292];mRNA splicing, via spliceosome [GO:0000398];regulation of alternative mRNA splicing, via spliceosome [GO:0000381];RNA splicing [GO:0008380]	cytoplasm [GO:0005737];nuclear speck [GO:0016607];nucleolus [GO:0005730];nucleus [GO:0005634];plasma membrane [GO:0005886];spliceosomal complex [GO:0005681]	mRNA binding [GO:0003729];RNA binding [GO:0003723];zinc ion binding [GO:0008270]	6	0	11.983	25	13.5	10.5	10.5	10.5	O81126	O81126	1517	RSZ22	Serine/arginine-rich splicing factor RSZ22
303263530731201	304333057403564	302952651977539	303069343566895	proteasomal protein catabolic process [GO:0010498];proteasomal ubiquitin-independent protein catabolic process [GO:0010499];proteasome-mediated ubiquitin-dependent protein catabolic process [GO:0043161];response to zinc ion [GO:0010043]	cytoplasm [GO:0005737];cytosol [GO:0005829];nucleus [GO:0005634];plastid [GO:0009536];proteasome complex [GO:0000502];proteasome core complex [GO:0005839];proteasome core complex, alpha-subunit complex [GO:0019773];vacuolar membrane [GO:0005774]	endopeptidase activity [GO:0004175];threonine-type endopeptidase activity [GO:0004298]	27	0	300.79	307	70.3	70.7	59.8	55.3	O81146	O81146	1519	PAA1	Proteasome subunit alpha type-6-A
286634635925293	284904479980469	286794929504395	28409610748291	proteasomal protein catabolic process [GO:0010498];proteasomal ubiquitin-independent protein catabolic process [GO:0010499];proteasome-mediated ubiquitin-dependent protein catabolic process [GO:0043161]	cytoplasm [GO:0005737];cytosol [GO:0005829];cytosolic ribosome [GO:0022626];mitochondrion [GO:0005739];nucleus [GO:0005634];polysomal ribosome [GO:0042788];proteasome complex [GO:0000502];proteasome core complex [GO:0005839];proteasome core complex, alpha-subunit complex [GO:0019773]	endopeptidase activity [GO:0004175];structural constituent of ribosome [GO:0003735];threonine-type endopeptidase activity [GO:0004298]	25	0	98.474	126	57.7	82.1	59.3	64.6	O81147	O81147	1520	PAA2	Proteasome subunit alpha type-6-B
298649787902832	299137058258057	300207538604736	299148464202881	proteasomal protein catabolic process [GO:0010498];proteasomal ubiquitin-independent protein catabolic process [GO:0010499];proteasome-mediated ubiquitin-dependent protein catabolic process [GO:0043161];response to cadmium ion [GO:0046686]	cytoplasm [GO:0005737];cytosol [GO:0005829];cytosolic ribosome [GO:0022626];mitochondrion [GO:0005739];nucleus [GO:0005634];proteasome complex [GO:0000502];proteasome core complex [GO:0005839];proteasome core complex, alpha-subunit complex [GO:0019773];vacuole [GO:0005773]	endopeptidase activity [GO:0004175];threonine-type endopeptidase activity [GO:0004298]	24	0	323.31	324	54.4	54	53.2	51.2	O81148	O81148	1521	PAC1	Proteasome subunit alpha type-4-A
283345375061035	28469913482666	282701263427734	283941516876221	proteasomal protein catabolic process [GO:0010498];proteasomal ubiquitin-independent protein catabolic process [GO:0010499];proteasome-mediated ubiquitin-dependent protein catabolic process [GO:0043161];response to cadmium ion [GO:0046686]	cytoplasm [GO:0005737];cytosol [GO:0005829];cytosolic ribosome [GO:0022626];nucleus [GO:0005634];plasma membrane [GO:0005886];polysomal ribosome [GO:0042788];proteasome complex [GO:0000502];proteasome core complex [GO:0005839];proteasome core complex, alpha-subunit complex [GO:0019773];vacuolar membrane [GO:0005774]	endopeptidase activity [GO:0004175];ribonuclease activity [GO:0004540];structural constituent of ribosome [GO:0003735];threonine-type endopeptidase activity [GO:0004298]	15	0	323.31	194	49.4	55.7	48.5	56.1	O81149	O81149	1522	PAE1	Proteasome subunit alpha type-5-A
313194236755371	312821216583252	313848915100098	313515281677246	defense response to bacterium [GO:0042742];embryo development ending in seed dormancy [GO:0009793];response to zinc ion [GO:0010043]	cytosol [GO:0005829];mitochondrial matrix [GO:0005759];mitochondrion [GO:0005739]	copper ion binding [GO:0005507];manganese ion binding [GO:0030145];metal ion binding [GO:0046872];superoxide dismutase activity [GO:0004784]	22	0	323.31	337	74.9	73.2	74.9	73.2	O81235	O81235	1524	MSD1	Superoxide dismutase [Mn] 1, mitochondrial
257154445648193	260861644744873	258255863189697	262753143310547	protein import into chloroplast stroma [GO:0045037];protein targeting to chloroplast [GO:0045036]	chloroplast [GO:0009507];chloroplast envelope [GO:0009941];chloroplast outer membrane [GO:0009707];cytosol [GO:0005829];integral component of membrane [GO:0016021];plastid [GO:0009536];TOC-TIC supercomplex I [GO:0061927]	chaperone binding [GO:0051087];G protein-coupled receptor activity [GO:0004930];GTP binding [GO:0005525];GTPase activity [GO:0003924];metal ion binding [GO:0046872];ribosomal small subunit binding [GO:0043024];transmembrane signaling receptor activity [GO:0004888]	10	0	16.709	36	3.7	5.2	3.2	4.3	O81283	O81283	1525	TOC159	Translocase of chloroplast 159, chloroplastic
NaN	NaN	243469219207764	244039268493652		vacuolar membrane [GO:0005774];vacuole [GO:0005773]		3	0	15.386	21	14.4	6.6	14.4	14.4	O81296	O81296	1526	At4g02370	AT4g02370 protein
278573894500732	279164428710938	279504928588867	277161388397217		peroxisome [GO:0005777]	hydrolase activity [GO:0016787]	16	0	71.618	118	25.9	20.4	31.2	21.9	O81299	O81299	1527	At4g02340	AT4g02340 protein
248730506896973	NaN	NaN	244351711273193	embryo development ending in seed dormancy [GO:0009793]			6	0	8.6655	16	3.6	0	0	2.3	O81325	O81325	1528	F6N15.2	ARM repeat superfamily protein
24669958114624	254800357818604	NaN	NaN	cell wall organization [GO:0071555];cellulose catabolic process [GO:0030245]	extracellular region [GO:0005576]	cellulase activity [GO:0008810]	3	0	7.1676	19	4.1	2.3	0	0	O81416;O49296	O81416	1529	At4g02290	Endoglucanase 17
300648384094238	301502532958984	300787734985352	30098108291626	photoinhibition [GO:0010205];response to abscisic acid [GO:0009737];response to cold [GO:0009409]	chloroplast [GO:0009507];chloroplast stroma [GO:0009570];chloroplast thylakoid [GO:0009534];chloroplast thylakoid membrane [GO:0009535];cytosol [GO:0005829];nucleus [GO:0005634];plastoglobule [GO:0010287];stromule [GO:0010319];thylakoid [GO:0009579];thylakoid lumen [GO:0031977]		20	0	193.81	241	51.3	50.9	51.3	53.1	O81439	O81439	1530	PAP1	Probable plastid-lipid-associated protein 1, chloroplastic
254897747039795	25611837387085	259891490936279	249103126525879	chromatin organization [GO:0006325];regulation of transcription, DNA-templated [GO:0006355]	cytosol [GO:0005829];nucleus [GO:0005634]	metal ion binding [GO:0046872];methylated histone binding [GO:0035064]	7	0	9.0397	47	13.3	12.9	16.9	9	O81488	O81488	1531	AL4	PHD finger protein ALFIN-LIKE 4
251472091674805	249426612854004	248346557617188	25239725112915		anchored component of membrane [GO:0031225];anchored component of plasma membrane [GO:0046658]	electron transfer activity [GO:0009055]	2	0	8.5995	13	19.8	11.2	19.8	19.8	O81500	O81500	1534	At5g26330	At5g26330
23173942565918	23230094909668	232337856292725	233041019439697		cytoplasm [GO:0005737];cytosol [GO:0005829];microtubule [GO:0005874];plasma membrane [GO:0005886]		30	0	164.54	152	5.9	5.7	1.5	5.7	O81629	O81629	1535	KLCR1	Protein KINESIN LIGHT CHAIN-RELATED 1
328460655212402	328063774108887	328571586608887	327970504760742	actin filament bundle assembly [GO:0051017];actin filament capping [GO:0051693];actin filament severing [GO:0051014];actin polymerization or depolymerization [GO:0008154]	actin cytoskeleton [GO:0015629];cytoplasm [GO:0005737];cytosol [GO:0005829]	actin filament binding [GO:0051015]	100	0	323.31	1550	61.3	57.9	61.8	64.2	O81644	O81644	1537	VLN2	Villin-2
32066764831543	320198249816895	320247535705566	320689125061035	actin filament bundle assembly [GO:0051017];actin filament capping [GO:0051693];actin filament severing [GO:0051014];actin polymerization or depolymerization [GO:0008154]	actin cytoskeleton [GO:0015629];actin filament [GO:0005884];cytoplasm [GO:0005737];cytosol [GO:0005829]	actin filament binding [GO:0051015]	84	0	323.31	1042	62.5	63.6	64	61.2	O81645	O81645	1538	VLN3	Villin-3
274957942962646	274451389312744	275302906036377	276327705383301	response to abscisic acid [GO:0009737]	plasma membrane [GO:0005886];vacuole [GO:0005773]	magnesium-dependent protein serine/threonine phosphatase activity [GO:0004724];metal ion binding [GO:0046872];protein serine/threonine phosphatase activity [GO:0004722]	24	0	108.31	136	32.7	27	25.9	13.8	O81716	O81716	1539	PPC4-2	Probable protein phosphatase 2C 21
249889755249023	254250869750977	252838687896729	253225116729736	carbohydrate metabolic process [GO:0005975]	cell wall [GO:0005618]	lyase activity [GO:0016829];polygalacturonase activity [GO:0004650]	3	0	88.977	11	9.5	1.6	4.6	1.6	O81746	O81746	1540	At4g23500	Pectin lyase-like superfamily protein
269195709228516	268362941741943	269192314147949	268696193695068	methylation [GO:0032259];peptidyl-diphthamide biosynthetic process from peptidyl-histidine [GO:0017183]		diphthine synthase activity [GO:0004164]	8	0	75.479	92	21.7	17	21.7	20.2	O81769	O81769	1541	At4g31790	Probable diphthine methyl ester synthase
233659973144531	235276679992676	241021347045898	239102210998535	response to oomycetes [GO:0002239]	plasma membrane [GO:0005886]	FAD binding [GO:0071949];monooxygenase activity [GO:0004497]	7	0	33.551	27	2.5	2.5	2.5	2.5	O81816	O81816	1542	MO2	Monooxygenase 2
253474292755127	239675445556641	253321743011475	NaN	auxin homeostasis [GO:0010252];camalexin biosynthetic process [GO:0010120];positive regulation of camalexin biosynthetic process [GO:1901183];response to auxin [GO:0009733]	cytoplasm [GO:0005737]	acid-amino acid ligase activity [GO:0016881];indole-3-acetic acid amido synthetase activity [GO:0010279]	24	0	88.532	56	3.3	9.5	3.3	0	O81829	O81829	1543	GH3.5	Indole-3-acetic acid-amido synthetase GH3.5
290684566497803	28999137878418	289833755493164	290565948486328	aspartate family amino acid biosynthetic process [GO:0009067];homoserine biosynthetic process [GO:0009090];lysine biosynthetic process via diaminopimelate [GO:0009089];methionine biosynthetic process [GO:0009086];threonine biosynthetic process [GO:0009088]	chloroplast [GO:0009507];chloroplast stroma [GO:0009570]	aspartate kinase activity [GO:0004072];ATP binding [GO:0005524];homoserine dehydrogenase activity [GO:0004412];NADP binding [GO:0050661]	51	0	150.42	267	30.9	26.9	28.8	27.2	O81852	O81852	1544	AKHSDH2	Bifunctional aspartokinase/homoserine dehydrogenase 2, chloroplastic
284327297210693	282591209411621	282203426361084	282077388763428	chitin catabolic process [GO:0006032];polysaccharide catabolic process [GO:0000272];response to abscisic acid [GO:0009737];response to jasmonic acid [GO:0009753];response to salt stress [GO:0009651]	cell wall [GO:0005618];extracellular region [GO:0005576];secretory vesicle [GO:0099503]	chitin binding [GO:0008061];chitinase activity [GO:0004568];endochitinase activity [GO:0008843];exochitinase activity [GO:0035885]	21	0	323.31	251	26.4	29	29.3	27.2	O81862	O81862	1545	ChiC	Class V chitinase
273629417419434	277855644226074	274464015960693	275520076751709		chloroplast thylakoid lumen [GO:0009543]	peptidyl-prolyl cis-trans isomerase activity [GO:0003755]	4	0	22.769	38	17.5	17.5	17.5	17.5	O81864	O81864	1546	FKBP17-1	Peptidyl-prolyl cis-trans isomerase FKBP17-1, chloroplastic
246238288879395	246892852783203	246399211883545	244324989318848	response to insect [GO:0009625]		carbohydrate binding [GO:0030246];proteoglycan binding [GO:0043394]	5	0	47.59	34	8.5	12.6	8.5	8.5	O81865	O81865	1547	PP2A1	Protein PHLOEM PROTEIN 2-LIKE A1
298643741607666	29772928237915	299062690734863	296917572021484	galactose metabolic process [GO:0006012];L-ascorbic acid biosynthetic process [GO:0019853]	cytosol [GO:0005829]	L-galactose dehydrogenase activity [GO:0010349];oxidoreductase activity [GO:0016491]	14	0	119.72	194	42	42	45.1	38.9	O81884	O81884	1548	LGALDH	L-galactose dehydrogenase
241043758392334	246730899810791	245464553833008	245781917572021	protein phosphorylation [GO:0006468];recognition of pollen [GO:0048544]	integral component of membrane [GO:0016021];plasma membrane [GO:0005886];plasmodesma [GO:0009506];vacuole [GO:0005773]	ATP binding [GO:0005524];carbohydrate binding [GO:0030246];protein serine/threonine kinase activity [GO:0004674];transmembrane receptor protein serine/threonine kinase activity [GO:0004675];ubiquitin protein ligase binding [GO:0031625]	5	0	10.476	12	2.8	2.8	4.1	4.6	O81905	O81905	1550	SD18	Receptor-like serine/threonine-protein kinase SD1-8
296744174957275	296324424743652	296197662353516	297586727142334	cellular copper ion homeostasis [GO:0006878];copper ion transport [GO:0006825];response to cadmium ion [GO:0046686]	chloroplast [GO:0009507];cytosol [GO:0005829]	copper chaperone activity [GO:0016531];protein domain specific binding [GO:0019904]	28	0	323.31	376	90.1	93.4	93.4	93.4	O82089	O82089	1552	CCH	Copper transport protein CCH
23986156463623	241649188995361	232563800811768	22977029800415	defense response to insect [GO:0002213];response to copper ion [GO:0046688];response to insect [GO:0009625];response to jasmonic acid [GO:0009753];response to oxidative stress [GO:0006979];response to wounding [GO:0009611]	cytosolic ribosome [GO:0022626];vacuole [GO:0005773]	acid phosphatase activity [GO:0003993];nutrient reservoir activity [GO:0045735]	6	0	3.1264	9	12.8	12.5	12.8	12.8	O82122	O82122	1553	VSP2	Vegetative storage protein 2
265420913696289	263946838378906	264748020172119	263635749816895	cytidine to uridine editing [GO:0016554];mitochondrial mRNA modification [GO:0080156];mRNA processing [GO:0006397]	endoplasmic reticulum [GO:0005783];mitochondrion [GO:0005739]	protein dimerization activity [GO:0046983];protein homodimerization activity [GO:0042803]	6	0	14.931	25	9.9	9.9	9.9	9.9	O82169	O82169	1554	MORF6	Multiple organellar RNA editing factor 6, mitochondrial
292426815032959	281650924682617	288595542907715	291183757781982	glycine decarboxylation via glycine cleavage system [GO:0019464]	glycine cleavage complex [GO:0005960];mitochondrion [GO:0005739]	ATP binding [GO:0005524]	11	0	131.9	128	11.5	26.3	17.3	11.5	O82179	O82179	1555	GDH2	Glycine cleavage system H protein 2, mitochondrial
248068580627441	229579086303711	243831748962402	24210147857666	malate metabolic process [GO:0006108];pyruvate metabolic process [GO:0006090]	chloroplast [GO:0009507];cytosol [GO:0005829];mitochondrion [GO:0005739]	malate dehydrogenase (decarboxylating) (NAD+) activity [GO:0004471];malate dehydrogenase (decarboxylating) (NADP+) activity [GO:0004473];malic enzyme activity [GO:0004470];metal ion binding [GO:0046872];NAD binding [GO:0051287];oxaloacetate decarboxylase activity [GO:0008948]	15	0	6.3178	27	9.8	11.2	9.8	7.9	O82191	O82191	1556	NADP-ME1	NADP-dependent malic enzyme 1
228954315185547	NaN	229661884307861	231448993682861				2	0	3.7361	4	4.2	0	4.2	4.2	O82202	O82202	1559	At2g19780	Leucine-rich repeat (LRR) family protein
258607444763184	264572143554688	254443321228027	NaN	adaxial/abaxial pattern specification [GO:0009955];leaf morphogenesis [GO:0009965];translation [GO:0006412]	cell wall [GO:0005618];chloroplast [GO:0009507];cytoplasm [GO:0005737];cytosolic large ribosomal subunit [GO:0022625];cytosolic ribosome [GO:0022626];mitochondrion [GO:0005739];nucleolus [GO:0005730];nucleoplasm [GO:0005654];nucleus [GO:0005634];plasma membrane [GO:0005886];plasmodesma [GO:0009506]	structural constituent of ribosome [GO:0003735]	27	0	323.31	248	17.5	24.5	17.5	0	O82204	O82204	1560	RPL28A	60S ribosomal protein L28-1
266506156921387	271547012329102	272701721191406	277124042510986	protein import into chloroplast stroma [GO:0045037]	chloroplast [GO:0009507];chloroplast envelope [GO:0009941];chloroplast stroma [GO:0009570];chloroplast thylakoid membrane [GO:0009535];vacuole [GO:0005773]	DNA binding [GO:0003677]	8	0	35.214	41	25.3	19.2	25.3	25.8	O82230	O82230	1562	STIC2	Nucleoid-associated protein At2g24020, chloroplastic
251260890960693	24730655670166	241393051147461	255279083251953		cytosol [GO:0005829];eukaryotic translation initiation factor 4F complex [GO:0016281]	mRNA binding [GO:0003729];translation initiation factor activity [GO:0003743]	20	0	32.371	53	6.2	3.2	4.6	3.5	O82233	O82233	1563	EIF(ISO)4G2	Eukaryotic translation initiation factor isoform 4G-2
278341846466064	277011413574219	27781379699707	274413433074951	chloroplast organization [GO:0009658];leaf development [GO:0048366];ribosome disassembly [GO:0032790]	chloroplast [GO:0009507];vacuole [GO:0005773]	ribosome binding [GO:0043022];translation initiation factor activity [GO:0003743]	15	0	46.452	87	32.4	29.5	32.4	28.8	O82234	O82234	1564	IF3-2	Translation initiation factor IF3-2, chloroplastic
310251846313477	30978214263916	312484722137451	311783084869385		cytosol [GO:0005829];Golgi apparatus [GO:0005794];plasma membrane [GO:0005886];vacuole [GO:0005773]	hydrolase activity [GO:0016787]	15	0	234.31	267	77.8	77.8	77.8	77.8	O82240	O82240	1565	At2g47710	Adenine nucleotide alpha hydrolases-like superfamily protein
319645442962646	318878364562988	319913520812988	320017890930176	chloroplast organization [GO:0009658];photosystem II repair [GO:0010206];protein catabolic process [GO:0030163];proteolysis [GO:0006508]	chloroplast [GO:0009507];chloroplast envelope [GO:0009941];chloroplast stroma [GO:0009570];chloroplast stromal thylakoid [GO:0009533];chloroplast thylakoid membrane [GO:0009535];cytosol [GO:0005829]	serine-type endopeptidase activity [GO:0004252]	33	0	323.31	458	48.1	52.6	51.7	51.4	O82261	O82261	1566	DEGP2	Protease Do-like 2, chloroplastic
267731647491455	268869285583496	26476749420166	258277912139893				22	0	98.497	129	11.5	21	16.1	18.3	O82263	O82263	1567	At2g47960	At2g47960/T9J23.10
2891042137146	290092926025391	289627590179443	288759880065918	proteasome-mediated ubiquitin-dependent protein catabolic process [GO:0043161];ubiquitin-dependent protein catabolic process [GO:0006511]	cytosol [GO:0005829];nucleus [GO:0005634]	ubiquitin binding [GO:0043130];ubiquitin protein ligase binding [GO:0031625]	16	0	136.6	189	30.5	34.4	30.5	34.6	O82264	O82264	1568	At2g47970	NPL4-like protein 2
268234729766846	271197128295898	274230213165283	279581470489502	cell division [GO:0051301];meiotic sister chromatid cohesion, centromeric [GO:0051754];monopolar spindle attachment to meiosis I kinetochore [GO:0051455];sister chromatid cohesion [GO:0007062]	chromatin [GO:0000785];chromosome [GO:0005694];cohesin complex [GO:0008278];nucleus [GO:0005634]	chromatin binding [GO:0003682]	6	0	8.7245	37	0.9	0.9	0.9	2.2	O82265	O82265	1569	SCC3	Sister-chromatid cohesion protein 3
283981952667236	288633098602295	285126190185547	290657901763916	phosphorylation [GO:0016310]	chloroplast [GO:0009507]		19	0	163.7	153	34.9	31.5	47.8	30.5	O82290	O82290	1571	SKL2	Probable inactive shikimate kinase like 2, chloroplastic
325542602539063	324582862854004	32640308380127	326082534790039		chloroplast [GO:0009507];chloroplast thylakoid [GO:0009534];chloroplast thylakoid membrane [GO:0009535];endoplasmic reticulum [GO:0005783];plastid [GO:0009536];plastoglobule [GO:0010287];thylakoid [GO:0009579]		23	0	323.31	404	54.8	54.8	52.9	54	O82291	O82291	1572	PAP3	Probable plastid-lipid-associated protein 3, chloroplastic
31990608215332	319075603485107	320458297729492	317690773010254		chloroplast [GO:0009507];chloroplast stroma [GO:0009570];cytoplasm [GO:0005737];endoplasmic reticulum [GO:0005783];nucleus [GO:0005634];ribonucleoprotein complex [GO:1990904];thylakoid [GO:0009579]	mRNA binding [GO:0003729]	25	0	323.31	376	57.8	57.8	57.8	59.4	O82299	O82299	1573	At2g35410	Putative chloroplast RNA binding protein
261660499572754	258516712188721	262449417114258	263307914733887			3'-5' exonuclease activity [GO:0008408];RNA binding [GO:0003723]	10	0	14.741	47	13.8	6.2	13.8	11.4	O82306	O82306	1574	At2g25910	3'-5' exonuclease domain-containing protein / K homology domain-containing protein / KH domain-containing protein
289089622497559	285267143249512	286716537475586	288038425445557		chloroplast [GO:0009507];vacuole [GO:0005773]		16	0	89.101	102	26.3	27.5	24.2	24.8	O82314	O82314	1575	At2g25830	Probable transcriptional regulatory protein At2g25830
270813159942627	281185741424561	272343444824219	NaN	response to desiccation [GO:0009269]	cytosol [GO:0005829];plasma membrane [GO:0005886]		10	0	64.711	58	7.2	7.2	7.2	0	O82355	O82355	1577	At2g46140	Desiccation-related protein At2g46140
250971183776855	257463245391846	247906436920166	25024959564209	pantothenate biosynthetic process [GO:0015940]	mitochondrion [GO:0005739]	3-methyl-2-oxobutanoate hydroxymethyltransferase activity [GO:0003864];magnesium ion binding [GO:0000287]	5	0	3.9632	8	12.7	5.2	12.7	18.4	O82357	O82357	1578	KPHMT1	3-methyl-2-oxobutanoate hydroxymethyltransferase 1, mitochondrial
243238182067871	NaN	246819610595703	252905616760254		intracellular membrane-bounded organelle [GO:0043231]	daphnetin 3-O-glucosyltransferase activity [GO:0102360];flavonol 3-O-glucosyltransferase activity [GO:0047893];myricetin 3-O-glucosyltransferase activity [GO:0102425];quercetin 3-O-glucosyltransferase activity [GO:0080043];UDP-glycosyltransferase activity [GO:0008194]	13	0	16.853	34	4.9	0	2.4	2.4	O82383	O82383	1581	UGT71D1	UDP-glycosyltransferase 71D1
308737907409668	308548221588135	299451694488525	317973785400391	response to vitamin B1 [GO:0010266];thiamine biosynthetic process [GO:0009228];thiamine diphosphate biosynthetic process [GO:0009229]	chloroplast [GO:0009507];chloroplast stroma [GO:0009570];plastid [GO:0009536]	4 iron, 4 sulfur cluster binding [GO:0051539];carbon-carbon lyase activity [GO:0016830];iron-sulfur cluster binding [GO:0051536];metal ion binding [GO:0046872];protein domain specific binding [GO:0019904]	43	0	323.31	331	40.7	44.4	43.6	41.5	O82392	O82392	1582	THIC	Phosphomethylpyrimidine synthase, chloroplastic
307953681945801	309319915771484	309132785797119	310666370391846	glyoxylate cycle [GO:0006097];malate metabolic process [GO:0006108];regulation of fatty acid beta-oxidation [GO:0031998];regulation of photorespiration [GO:0080093];tricarboxylic acid cycle [GO:0006099]	chloroplast [GO:0009507];cytoplasm [GO:0005737];peroxisome [GO:0005777]	L-malate dehydrogenase activity [GO:0030060]	27	0	323.31	496	51.1	54.5	61.6	59.6	O82399	O82399	1583	PMDH1	Malate dehydrogenase 1, peroxisomal
28110034942627	281338882446289	280462474822998	280832443237305	histidyl-tRNA aminoacylation [GO:0006427]	chloroplast [GO:0009507];mitochondrion [GO:0005739]	ATP binding [GO:0005524];histidine-tRNA ligase activity [GO:0004821]	18	0	23.989	111	20.8	26.5	17.1	24.3	O82413	O82413	1584	At3g46100	Histidine--tRNA ligase, chloroplastic/mitochondrial
292434978485107	294220581054688	293785285949707	291886024475098	glutaminyl-tRNA aminoacylation [GO:0006425];glutamyl-tRNA aminoacylation [GO:0006424]	cytosol [GO:0005829];plastid [GO:0009536]	ATP binding [GO:0005524];glutamate-tRNA ligase activity [GO:0004818];glutamine-tRNA ligase activity [GO:0004819]	62	0	323.31	394	31.6	31.3	33.7	24.2	O82462	O82462	1585	At5g26710	Glutamate--tRNA ligase, cytoplasmic
262478771209717	263617191314697	262190399169922	261623859405518		cytoplasm [GO:0005737];cytosol [GO:0005829];mitochondrion [GO:0005739];plastid [GO:0009536]	aldehyde-lyase activity [GO:0016832]	9	0	55.066	52	17.6	8.9	8.9	8.9	O82487	O82487	1587	T12H20.10	Phosphoenolpyruvate carboxylase family protein
260258255004883	262011623382568	252744426727295	235224094390869	DNA repair [GO:0006281];DNA replication [GO:0006260];DNA replication-independent nucleosome organization [GO:0034724];positive regulation of transcription elongation from RNA polymerase II promoter [GO:0032968];transcription elongation from RNA polymerase II promoter [GO:0006368];vegetative to reproductive phase transition of meristem [GO:0010228]	FACT complex [GO:0035101];nuclear euchromatin [GO:0005719];nucleolus [GO:0005730];nucleus [GO:0005634]	histone binding [GO:0042393];nucleosome binding [GO:0031491]	23	0	61.358	84	0.8	0.8	3.4	1.3	O82491	O82491	1588	SPT16	FACT complex subunit SPT16
271305541992188	267658500671387	270627059936523	27190746307373		chloroplast [GO:0009507];cytosol [GO:0005829]	ribosome binding [GO:0043022];translation initiation factor activity [GO:0003743]	7	0	28.209	48	46.1	44.7	47.5	46.1	O82499	O82499	1590	At4g11175	Translation initiation factor IF-1, chloroplastic
NaN	237051429748535	NaN	240695629119873	nucleoside diphosphate metabolic process [GO:0009132];purine nucleotide metabolic process [GO:0006163];response to cadmium ion [GO:0046686]	cytoplasm [GO:0005737];cytosol [GO:0005829];mitochondrion [GO:0005739];plastid [GO:0009536];vacuolar membrane [GO:0005774]	adenylate kinase activity [GO:0004017];ATP binding [GO:0005524];copper ion binding [GO:0005507]	2	0	3.2757	4	0	5.7	0	5.7	O82514	O82514	1591	ADK1	Adenylate kinase 4
297104187011719	295644912719727	299032554626465	299822330474854	chloroplast fission [GO:0010020];organelle fission [GO:0048285]	chloroplast [GO:0009507];chloroplast stroma [GO:0009570];chloroplast thylakoid [GO:0009534];chloroplast thylakoid membrane [GO:0009535];cytoplasm [GO:0005737];endoplasmic reticulum [GO:0005783]	GTP binding [GO:0005525];GTPase activity [GO:0003924];protein self-association [GO:0043621]	19	0	304.54	205	32.8	39.5	34.9	33.1	O82533	O82533	1592	FTSZ2-1	Cell division protein FtsZ homolog 2-1, chloroplastic
266470508575439	268377380371094	267363452911377	269177513122559	phosphate-containing compound metabolic process [GO:0006796]	cytosol [GO:0005829];nucleoplasm [GO:0005654]	inorganic diphosphatase activity [GO:0004427];magnesium ion binding [GO:0000287]	17	0	16.971	35	28.2	29.6	35.2	27.8	O82597	O82597	1593	PPA5	Soluble inorganic pyrophosphatase 5
259106788635254	258787441253662	257214794158936	258419895172119	positive regulation of DNA repair [GO:0045739]	BRCA1-A complex [GO:0070531];BRISC complex [GO:0070552]		6	0	3.3492	23	9.8	12.5	9.8	15.2	O82638	O82638	1594	At4g32960	At4g32960
299469833374023	29944751739502	300411376953125	301047458648682	defense response [GO:0006952];intracellular signal transduction [GO:0035556];negative regulation of defense response [GO:0031348];protein dephosphorylation [GO:0006470]	cytoplasm [GO:0005737];nucleus [GO:0005634];plasma membrane [GO:0005886]	kinase binding [GO:0019900];MAP kinase tyrosine phosphatase activity [GO:0033550];protein tyrosine phosphatase activity [GO:0004725]	27	0	280.14	367	53.8	57.1	55.3	55.6	O82656	O82656	1596	PTP1	Protein-tyrosine-phosphatase PTP1
336650085449219	336710319519043	336653251647949	337316589355469	response to cadmium ion [GO:0046686];succinyl-CoA metabolic process [GO:0006104];tricarboxylic acid cycle [GO:0006099]	mitochondrion [GO:0005739];succinate-CoA ligase complex [GO:0042709]	ATP binding [GO:0005524];copper ion binding [GO:0005507];magnesium ion binding [GO:0000287];succinate-CoA ligase (ADP-forming) activity [GO:0004775];succinate-CoA ligase (GDP-forming) activity [GO:0004776]	82	0	323.31	1506	86.5	86	86.5	85.3	O82662	O82662	1597	At2g20420	Succinate--CoA ligase [ADP-forming] subunit beta, mitochondrial
310936450958252	310955963134766	311720027923584	311472225189209	mitochondrial electron transport, succinate to ubiquinone [GO:0006121];tricarboxylic acid cycle [GO:0006099]	cell wall [GO:0005618];mitochondrial respiratory chain complex II, succinate dehydrogenase complex (ubiquinone) [GO:0005749];mitochondrion [GO:0005739];plastid [GO:0009536];respiratory chain complex II [GO:0045273]	ATP binding [GO:0005524];cobalt ion binding [GO:0050897];electron transfer activity [GO:0009055];flavin adenine dinucleotide binding [GO:0050660];oxidoreductase activity [GO:0016491];succinate dehydrogenase (ubiquinone) activity [GO:0008177];succinate dehydrogenase activity [GO:0000104]	49	0	323.31	847	47.2	53.8	51.1	40.7	O82663	O82663	1598	SDH1-1	Succinate dehydrogenase [ubiquinone] flavoprotein subunit 1, mitochondrial
264425144195557	263951587677002	266944484710693	268037815093994	pollen tube growth [GO:0009860];root hair cell tip growth [GO:0048768]	cytoplasm [GO:0005737];cytosol [GO:0005829];nucleus [GO:0005634]	metal ion binding [GO:0046872];protein serine/threonine phosphatase activity [GO:0004722]	12	0	19.177	44	21.9	25	20.4	26.2	O82734	O82734	1599	TOPP8	Serine/threonine-protein phosphatase PP1 isozyme 8
306599140167236	306809349060059	307114524841309	306276664733887	regulation of gene expression [GO:0010468]	cytoplasm [GO:0005737];cytosol [GO:0005829];vacuole [GO:0005773]	mRNA binding [GO:0003729]	24	0	186.76	360	35.4	35.3	35.3	35.3	O82762	O82762	1600	At2g25970	F17H15.1/F17H15.1
303713989257813	304252243041992	305192527770996	303485774993896	histidine biosynthetic process [GO:0000105]	chloroplast [GO:0009507];chloroplast stroma [GO:0009570];cytosol [GO:0005829]	ATP binding [GO:0005524];phosphoribosyl-AMP cyclohydrolase activity [GO:0004635];phosphoribosyl-ATP diphosphatase activity [GO:0004636]	25	0	103.6	207	56.9	54.1	52	56.9	O82768	O82768	1601	HISN2	Histidine biosynthesis bifunctional protein hisIE, chloroplastic
251715774536133	251099643707275	251906909942627	255403785705566	carbohydrate metabolic process [GO:0005975];glucosinolate catabolic process [GO:0019762];response to salt stress [GO:0009651]	endoplasmic reticulum [GO:0005783]	beta-glucosidase activity [GO:0008422]	23	0	48.717	94	4.9	11.5	7	6.8	O82772	O82772	1602	BGLU25	Probable inactive beta-glucosidase 25
286530094146729	286633625030518	281846122741699	286660747528076	histidine biosynthetic process [GO:0000105];tryptophan biosynthetic process [GO:0000162]	chloroplast [GO:0009507];cytoplasm [GO:0005737]	1-(5-phosphoribosyl)-5-[(5-phosphoribosylamino)methylideneamino]imidazole-4-carboxamide isomerase activity [GO:0003949]	15	0	57.869	115	22.7	27.3	22.7	29.3	O82782	O82782	1603	HISN3	1-(5-phosphoribosyl)-5-[(5-phosphoribosylamino)methylideneamino] imidazole-4-carboxamide isomerase, chloroplastic
305216884613037	305371398925781	305022773742676	307107124328613	methylation [GO:0032259];SNARE complex assembly [GO:0035493]	chloroplast [GO:0009507];chloroplast stroma [GO:0009570];cytosol [GO:0005829];endosome [GO:0005768];lytic vacuole [GO:0000323]	methyltransferase activity [GO:0008168];SNARE binding [GO:0000149]	28	0	168.1	320	73.1	76.1	68.7	51.9	O82790	O82790	1604	At2g45990	AT2G45990 protein
284126815795898	285064277648926	284595527648926	284890327453613	dephosphorylation [GO:0016311];embryo development ending in seed dormancy [GO:0009793];L-serine biosynthetic process [GO:0006564];L-serine metabolic process [GO:0006563];pollen development [GO:0009555];root development [GO:0048364];sulfur amino acid metabolic process [GO:0000096]	chloroplast [GO:0009507];cytoplasm [GO:0005737];plastid [GO:0009536]	calcium ion binding [GO:0005509];magnesium ion binding [GO:0000287];phosphatase activity [GO:0016791];phosphoserine phosphatase activity [GO:0004647]	14	0	40.134	167	27.5	33.9	40.7	41.4	O82796	O82796	1605	PSP	Phosphoserine phosphatase, chloroplastic
280234279632568	279849510192871	281517524719238	280299167633057				9	0	58.514	56	37.7	33.3	34.3	31.9	O82808	O82808	1606	At2g25950	At2g25950
322334365844727	32168270111084	322567901611328	322229423522949	aromatic amino acid family biosynthetic process [GO:0009073];chorismate biosynthetic process [GO:0009423]	chloroplast [GO:0009507];chloroplast stroma [GO:0009570]	3-phosphoshikimate 1-carboxyvinyltransferase activity [GO:0003866]	38	0	323.31	841	48.3	48.1	54.4	48.3	P05466	P05466	1608	At2g45300	3-phosphoshikimate 1-carboxyvinyltransferase, chloroplastic
278897151947021	277678089141846	279140491485596	278623065948486	cellular response to hypoxia [GO:0071456];formaldehyde catabolic process [GO:0046294];positive regulation of cellular response to hypoxia [GO:1900039];response to abscisic acid [GO:0009737];response to cadmium ion [GO:0046686];response to caffeine [GO:0031000];response to cold [GO:0009409];response to estradiol [GO:0032355];response to flooding [GO:0009413];response to hydrogen peroxide [GO:00425…	cytosol [GO:0005829];plasma membrane [GO:0005886]	alcohol dehydrogenase (NAD+) activity [GO:0004022];alcohol dehydrogenase activity, zinc-dependent [GO:0004024];nucleotide binding [GO:0000166];protein homodimerization activity [GO:0042803];S-(hydroxymethyl)glutathione dehydrogenase activity [GO:0051903];zinc ion binding [GO:0008270]	25	0	106.72	117	34.8	24	24	18.7	P06525	P06525	1609	ADH1	Alcohol dehydrogenase class-P
289235153198242	288468208312988	290231094360352	292626419067383	ATP synthesis coupled proton transport [GO:0015986]	chloroplast [GO:0009507];chloroplast envelope [GO:0009941];chloroplast thylakoid [GO:0009534];chloroplast thylakoid membrane [GO:0009535];plastid [GO:0009536];proton-transporting ATP synthase complex, catalytic core F(1) [GO:0045261];thylakoid [GO:0009579]	ATP binding [GO:0005524];proton-transporting ATP synthase activity, rotational mechanism [GO:0046933]	11	0	145.3	133	79.5	87.9	87.9	75.8	P09468	P09468	1610	atpE	ATP synthase epsilon chain, chloroplastic
260392780303955	262680130004883	262056064605713	262652435302734				9	0	18.939	71	15	22.5	15	14.2	P0C895	P0C895	1611	At2g30105	LRR repeats and ubiquitin-like domain-containing protein At2g30105
NaN	242352027893066	23936429977417	25492956161499		mitochondrion [GO:0005739]		19	0	45.838	84	1.7	2.1	2.1	2.1	P0C896	P0C896	1612	At3g02650	Pentatricopeptide repeat-containing protein At3g02650, mitochondrial
302090892791748	30356050491333	30269079208374	304998092651367	developmental growth [GO:0048589];root hair elongation [GO:0048767]	cell wall [GO:0005618];cytoplasm [GO:0005737];cytoskeleton [GO:0005856];cytosol [GO:0005829];endoplasmic reticulum [GO:0005783];plasma membrane [GO:0005886];plasmodesma [GO:0009506]	ATP binding [GO:0005524];structural constituent of cytoskeleton [GO:0005200]	46	0	323.31	340	62.9	77.5	69.2	77.2	P0CJ46	P0CJ46	1614	ACT1	Actin-1
307049541473389	305392684936523	305403785705566	305640182495117	fatty acid beta-oxidation [GO:0006635];fatty acid beta-oxidation using acyl-CoA oxidase [GO:0033540];lipid homeostasis [GO:0055088];medium-chain fatty acid metabolic process [GO:0051791]	extracellular region [GO:0005576];peroxisome [GO:0005777]	acyl-CoA oxidase activity [GO:0003997];FAD binding [GO:0071949];fatty acid binding [GO:0005504];flavin adenine dinucleotide binding [GO:0050660]	48	0	323.31	610	45.8	44	53.6	52.3	P0CZ23	P0CZ23	1615	ACX3	Acyl-coenzyme A oxidase 3, peroxisomal
NaN	318090057373047	319930076599121	321065559387207		nucleus [GO:0005634]	DNA binding [GO:0003677]	1	0.0052403	1.8238	15	0	2	2	2	P0DH85	P0DH85	1616	REM10	B3 domain-containing protein REM10
23826774597168	NaN	238630619049072	NaN	calcium-mediated signaling [GO:0019722]	cytoplasm [GO:0005737];plasma membrane [GO:0005886]	calcium ion binding [GO:0005509]	8	0	3.5258	4	45.6	39.6	45.6	39.6	P0DH95	P0DH95	1617	CAM1	Calmodulin-1
359590644836426	359289703369141	359241752624512	358380126953125	translation [GO:0006412];translational elongation [GO:0006414]	mitochondrion [GO:0005739];plasma membrane [GO:0005886];plasmodesma [GO:0009506]	GTP binding [GO:0005525];GTPase activity [GO:0003924];translation elongation factor activity [GO:0003746]	73	0	323.31	3511	82.2	76.2	82.2	83.1	P0DH99;Q6NLF6	P0DH99	1618	A1	Elongation factor 1-alpha 1
259779720306396	264569797515869	NaN	262304458618164				10	0	17.831	24	9	9	7.6	9	P0DI06	P0DI06	1619	At1g25211	F-box/kelch-repeat protein At1g25211
271289825439453	271695919036865	264396953582764	274587326049805	histidine biosynthetic process [GO:0000105]	chloroplast stroma [GO:0009570]	histidinol-phosphate transaminase activity [GO:0004400];pyridoxal phosphate binding [GO:0030170]	10	0	8.5709	31	13.7	13.2	12.5	11.8	P0DI07	P0DI07	1620	HISN6B	Histidinol-phosphate aminotransferase 2, chloroplastic
204531211853027	NaN	NaN	215040225982666	terpenoid biosynthetic process [GO:0016114]	chloroplast [GO:0009507]	1,8-cineole synthase activity [GO:0102313];magnesium ion binding [GO:0000287];terpene synthase activity [GO:0010333]	46	0	323.31	268	1.3	0	0	1.3	P0DI76	P0DI76	1621	TPS27	1,8-cineole synthase 1, chloroplastic
NaN	24634557723999	NaN	244264965057373		integral component of membrane [GO:0016021]		7	0	7.7423	17	0	2.9	0	5.7	P0DI79	P0DI79	1622	At3g28300	UPF0496 protein At3g28300
349165191650391	346767692565918	349821395874023	347268486022949	dephosphorylation [GO:0016311];photorespiration [GO:0009853]	chloroplast [GO:0009507]	phosphatase activity [GO:0016791];phosphoglycolate phosphatase activity [GO:0008967]	40	0	323.31	1286	64.1	63.8	64.1	64.1	P0DKC4	P0DKC4	1624	PGLP1B	Phosphoglycolate phosphatase 1B, chloroplastic
311556911468506	311398029327393	30207576751709	312444515228271			oxidoreductase activity [GO:0016491]	15	0	166.86	231	64.7	63.2	64.7	63.2	P0DKI3	P0DKI3	1625	At1g07440	Tropinone reductase homolog At1g07440
287674617767334	284800815582275	283690700531006	283267593383789	microgametogenesis [GO:0055046];mRNA splicing, via spliceosome [GO:0000398];plant ovule development [GO:0048481];pollen development [GO:0009555];pollen germination [GO:0009846]	nucleus [GO:0005634]	nucleic acid binding [GO:0003676]	52	0	323.31	358	20.1	13.3	14.1	16.5	P0DKL6	P0DKL6	1626	SAP130B	Spliceosome-associated protein 130 B
357158966064453	357663841247559	356555480957031	357966499328613	chloroplast ribulose bisphosphate carboxylase complex assembly [GO:0110102];photorespiration [GO:0009853];photosynthesis [GO:0015979];reductive pentose-phosphate cycle [GO:0019253];response to blue light [GO:0009637];response to cold [GO:0009409];response to far red light [GO:0010218];response to red light [GO:0010114]	apoplast [GO:0048046];chloroplast [GO:0009507];chloroplast envelope [GO:0009941];chloroplast membrane [GO:0031969];chloroplast stroma [GO:0009570];chloroplast thylakoid membrane [GO:0009535];cytosolic ribosome [GO:0022626];mitochondrion [GO:0005739];thylakoid [GO:0009579];thylakoid lumen [GO:0031977]	copper ion binding [GO:0005507];monooxygenase activity [GO:0004497];ribulose-bisphosphate carboxylase activity [GO:0016984]	28	0	323.31	1020	64.4	64.4	64.4	64.4	P10795	P10795	1628	RBCS-1A	Ribulose bisphosphate carboxylase small chain 1A, chloroplastic
367054786682129	366311149597168	366551780700684	367463531494141	photorespiration [GO:0009853];reductive pentose-phosphate cycle [GO:0019253];response to blue light [GO:0009637];response to far red light [GO:0010218];response to red light [GO:0010114]	apoplast [GO:0048046];chloroplast [GO:0009507];chloroplast envelope [GO:0009941];chloroplast membrane [GO:0031969];chloroplast stroma [GO:0009570];plastid [GO:0009536];thylakoid [GO:0009579]	monooxygenase activity [GO:0004497];protein domain specific binding [GO:0019904];ribulose-bisphosphate carboxylase activity [GO:0016984]	32	0	323.31	1901	68.5	68.5	68.5	68.5	P10796	P10796	1629	RBCS-1B	Ribulose bisphosphate carboxylase small chain 1B, chloroplastic
368165740966797	368703918457031	36761043548584	367897453308105	defense response to bacterium [GO:0042742];leaf senescence [GO:0010150];response to cold [GO:0009409];response to jasmonic acid [GO:0009753];response to light stimulus [GO:0009416]	apoplast [GO:0048046];cell wall [GO:0005618];chloroplast [GO:0009507];chloroplast envelope [GO:0009941];chloroplast stroma [GO:0009570];chloroplast thylakoid membrane [GO:0009535];Golgi apparatus [GO:0005794];nucleus [GO:0005634];plastoglobule [GO:0010287];stromule [GO:0010319];thylakoid [GO:0009579]	ADP binding [GO:0043531];ATP binding [GO:0005524];enzyme regulator activity [GO:0030234];ribulose-1,5-bisphosphate carboxylase/oxygenase activator activity [GO:0046863]	61	0	323.31	3789	85.7	85.7	85.7	85.7	P10896	P10896	1630	RCA	Ribulose bisphosphate carboxylase/oxygenase activase, chloroplastic
323124618530273	321669845581055	322820663452148	323627510070801	nitrate assimilation [GO:0042128];nitric oxide biosynthetic process [GO:0006809];response to herbicide [GO:0009635];response to light stimulus [GO:0009416];response to symbiotic fungus [GO:0009610]	cytosol [GO:0005829];nucleus [GO:0005634];plasma membrane [GO:0005886];vacuole [GO:0005773]	FAD binding [GO:0071949];heme binding [GO:0020037];molybdenum ion binding [GO:0030151];molybdopterin cofactor binding [GO:0043546];nitrate reductase (NADH) activity [GO:0009703];nitrate reductase (NADPH) activity [GO:0050464];nitrate reductase activity [GO:0008940]	89	0	323.31	930	63.2	57.1	63.6	60.6	P11035	P11035	1631	NIA2	Nitrate reductase [NADH] 2
264471893310547	263836212158203	263027782440186	264577789306641	microtubule cytoskeleton organization [GO:0000226];microtubule-based process [GO:0007017];mitotic cell cycle [GO:0000278]	cytoplasm [GO:0005737];cytosol [GO:0005829];microtubule [GO:0005874];nucleus [GO:0005634];plasma membrane [GO:0005886]	GTP binding [GO:0005525];GTPase activity [GO:0003924];structural constituent of cytoskeleton [GO:0005200]	22	0	52.869	56	40.9	33.1	40.2	42.9	P11139	P11139	1632	TUBA1	Tubulin alpha-1 chain
289546852111816	287170543670654	290092926025391	290761241912842		chloroplast [GO:0009507];chloroplast thylakoid membrane [GO:0009535];mitochondrion [GO:0005739];thylakoid [GO:0009579];thylakoid lumen [GO:0031977]	copper ion binding [GO:0005507];electron transfer activity [GO:0009055]	6	0	205.98	75	42.1	42.1	44.4	18.1	P11490	P11490	1633	PETE	Plastocyanin minor isoform, chloroplastic
320154457092285	31955322265625	31928747177124	319881038665771	actin filament bundle assembly [GO:0051017];actin filament capping [GO:0051693];ATP metabolic process [GO:0046034];glucose mediated signaling pathway [GO:0010255];negative regulation of actin filament depolymerization [GO:0030835];proton transmembrane transport [GO:1902600];regulation of transcription by RNA polymerase II [GO:0006357];response to cadmium ion [GO:0046686]	Golgi apparatus [GO:0005794];mitochondrion [GO:0005739];nucleus [GO:0005634];plasma membrane [GO:0005886];plasmodesma [GO:0009506];protein-containing complex [GO:0032991];proton-transporting V-type ATPase, V1 domain [GO:0033180];vacuolar membrane [GO:0005774];vacuole [GO:0005773]	actin filament binding [GO:0051015];ATP binding [GO:0005524];hydrolase activity [GO:0016787]	48	0	323.31	1421	80	79.8	71.8	66.3	P11574	P11574	1634	VHA-B1	V-type proton ATPase subunit B1
259678745269775	264174461364746	261327114105225	261506214141846	nitrate assimilation [GO:0042128];nitric oxide biosynthetic process [GO:0006809];response to herbicide [GO:0009635];response to light stimulus [GO:0009416]	cytosol [GO:0005829]	FAD binding [GO:0071949];heme binding [GO:0020037];molybdenum ion binding [GO:0030151];molybdopterin cofactor binding [GO:0043546];nitrate reductase (NADH) activity [GO:0009703];nitrate reductase (NADPH) activity [GO:0050464];nitrate reductase activity [GO:0008940]	37	0	142.28	166	8.3	9.9	11.3	8.3	P11832	P11832	1636	NIA1	Nitrate reductase [NADH] 1
262000961303711	26124137878418	264155769348145	252020606994629	auxin polar transport [GO:0009926];flavonoid biosynthetic process [GO:0009813];regulation of anthocyanin biosynthetic process [GO:0031540];response to auxin [GO:0009733];response to gravity [GO:0009629];response to jasmonic acid [GO:0009753];response to oxidative stress [GO:0006979];response to UV-B [GO:0010224];response to wounding [GO:0009611]	endoplasmic reticulum [GO:0005783];nucleus [GO:0005634];plant-type vacuole membrane [GO:0009705]	naringenin-chalcone synthase activity [GO:0016210]	44	0	323.31	492	37.2	25.6	38.2	44.8	P13114;Q9FJF8	P13114	1638	CHS	Chalcone synthase
318384208679199	317622814178467	318201217651367	318452816009521	indoleacetic acid biosynthetic process [GO:0009684];response to oxidative stress [GO:0006979];tryptophan biosynthetic process [GO:0000162]	chloroplast [GO:0009507];chloroplast stroma [GO:0009570];cytoplasm [GO:0005737];plasma membrane [GO:0005886]	protein domain specific binding [GO:0019904];tryptophan synthase activity [GO:0004834]	39	0	323.31	616	72.3	70.9	69.4	72.1	P14671	P14671	1639	TSB1	Tryptophan synthase beta chain 1, chloroplastic
NaN	NaN	244079494476318	23500452041626	abscisic acid metabolic process [GO:0009687];chromatin organization [GO:0006325];circadian regulation of calcium ion oscillation [GO:0010617];detection of visible light [GO:0009584];entrainment of circadian clock [GO:0009649];gravitropism [GO:0009630];jasmonic acid mediated signaling pathway [GO:0009867];negative regulation of transcription, DNA-templated [GO:0045892];photomorphogenesis [GO:00096…	cytosol [GO:0005829];nuclear body [GO:0016604];nuclear speck [GO:0016607];nucleus [GO:0005634]	far-red light photoreceptor activity [GO:0031516];identical protein binding [GO:0042802];phosphorelay sensor kinase activity [GO:0000155];promoter-specific chromatin binding [GO:1990841];protein homodimerization activity [GO:0042803];red light photoreceptor activity [GO:0031517];red or far-red light photoreceptor activity [GO:0009883];sequence-specific DNA binding [GO:0043565]	28	0	126.82	80	0	0	0.9	2.4	P14713	P14713	1641	PHYB	Phytochrome B
322636871337891	323499488830566	324020233154297	323769989013672	chlorophyll biosynthetic process [GO:0015995];photosynthesis [GO:0015979]	cell wall [GO:0005618];chloroplast [GO:0009507];chloroplast stroma [GO:0009570];cytosol [GO:0005829];magnesium chelatase complex [GO:0010007]	ATP binding [GO:0005524];ATPase activity [GO:0016887];magnesium chelatase activity [GO:0016851]	37	0	188.24	439	56.1	57.3	55.7	56.8	P16127	P16127	1642	CHLI1	Magnesium-chelatase subunit ChlI-1, chloroplastic
231481781005859	225442752838135	226160507202148	230537433624268	plastid translation [GO:0032544]	chloroplast [GO:0009507];chloroplast envelope [GO:0009941];chloroplast stroma [GO:0009570];chloroplast thylakoid [GO:0009534];cytosolic small ribosomal subunit [GO:0022627];mitochondrion [GO:0005739];plastid small ribosomal subunit [GO:0000312]	rRNA binding [GO:0019843];structural constituent of ribosome [GO:0003735]	3	0.00057056	2.6483	5	6	20.1	20.1	6	P16180	P16180	1643	RPS17	30S ribosomal protein S17, chloroplastic
31437479019165	308644485473633	313580951690674	313464126586914	photosynthetic acclimation [GO:0009643];photosynthetic electron transport chain [GO:0009767]	chloroplast [GO:0009507]	2 iron, 2 sulfur cluster binding [GO:0051537];electron transfer activity [GO:0009055];metal ion binding [GO:0046872]	6	0	323.31	137	60.8	60.8	60.8	60.8	P16972	P16972	1645	FD2	Ferredoxin-2, chloroplastic
[truncated: 3,212 more rows]
