# Supplementary material for: Proteome Dynamics of Persulfidation in Leaf Tissue under Light/Dark Conditions and Carbon Deprivation
Source: Antioxidants (Basel). 2023 Mar 23;12(4):789. doi: 10.3390/antiox12040789 (PMC10135009; doi:10.3390/antiox12040789)
Supplement: Supplementary file 1 [file antioxidants-12-00789-s001.zip › Dataset S5.xlsx]

## Sheet: Hoja1
Dataset 5. Differentially quantied proteins in the four sample groups.
LFQ intensity S11	LFQ intensity S12	LFQ intensity S13	LFQ intensity S14	LFQ intensity S21	LFQ intensity S22	LFQ intensity S23	LFQ intensity S24	LFQ intensity S31	LFQ intensity S32	LFQ intensity S33	LFQ intensity S34	LFQ intensity S41	LFQ intensity S42	LFQ intensity S43	LFQ intensity S44	C: Gene ontology (biological process)	C: Gene ontology (cellular component)	C: Gene ontology (molecular function)	C: ANOVA Significant	N: Peptides	N: Razor + unique peptides	N: Unique peptides	N: Sequence coverage [%]	N: Unique + razor sequence coverage [%]	N: Unique sequence coverage [%]	N: Mol. weight [kDa]	N: Q-value	N: Score	N: Intensity	N: MS/MS count	N: Intensity MN1	N: Intensity MN2	N: Intensity MN3	N: Intensity MN4	N: Intensity PN1	N: Intensity PN2	N: Intensity PN3	N: Intensity PN4	N: Intensity S11	N: Intensity S12	N: Intensity S13	N: Intensity S14	N: Intensity S21	N: Intensity S22	N: Intensity S23	N: Intensity S24	N: Intensity S31	N: Intensity S32	N: Intensity S33
-0.992716	-0.150214	1.26243	-1.82118	0.425498	-0.110586	-0.00932837	0.211787	-0.783509	-1.04942	-0.706242	-0.718751	1.22248	0.197321	1.58806	1.43437	photosynthesis [GO:0015979]	extrinsic component of membrane [GO:0019898];photosystem II oxygen evolving complex [GO:0009654]	calcium ion binding [GO:0005509]	+	17	17	17	40.6	40.6	40.6	35.328	0	66.223	9319100000	100	0	33610000	9195200	0	22090000	0	0	38011000	462130000	479500000	624910000	476210000	396270000	540550000	596910000	571530000	481040000	387120000	551020000
-1.36178	-2.13155	-1.64006	-0.287072	-0.384538	0.469129	0.701978	-0.464121	0.729585	0.460092	0.697808	1.59007	0.0967762	0.745387	0.137507	0.640786	cell wall modification [GO:0042545];pectin catabolic process [GO:0045490]		aspartyl esterase activity [GO:0045330];enzyme inhibitor activity [GO:0004857];pectinesterase activity [GO:0030599]	+	9	9	8	24.3	24.3	22.4	63.503	0	106.78	3628000000	60	325480000	311040000	146800000	205230000	263370000	217250000	121850000	157270000	87782000	55430000	92929000	102760000	74661000	127250000	84893000	108820000	160250000	128170000	190730000
-0.000385207	0.664816	0.818807	-0.920588	-0.795709	-1.39612	-0.584483	-1.64497	1.33191	-0.622225	0.602375	0.114159	1.35605	-0.904708	0.634477	1.34658				+	9	9	9	59	59	59	20.302	0	31.697	2579000000	50	175280000	202250000	169570000	136310000	292100000	273310000	189610000	227960000	57427000	70670000	80587000	27232000	29517000	22051000	26492000	29358000	94562000	32846000	79458000
-1.21391	0.42996	0.39517	0.612163	0.65249	0.390307	0.307219	0.436161	-1.88166	0.278248	-0.783385	-2.38218	0.424326	0.607753	0.85419	0.873143			FMN binding [GO:0010181];oxidoreductase activity [GO:0016491]	+	4	4	4	15.2	15.2	15.2	30.314	0.0086572	1.5291	375120000	6	45191000	50397000	0	63441000	0	6479200	29533000	0	2609300	28556000	22741000	10551000	7989500	6986300	6631500	7679200	0	4930000	5037100
-0.218815	0.287375	1.14546	0.682779	-1.19994	0.122345	-3.02943	-0.211315	0.907406	0.0369448	0.870818	0.785605	-0.125812	-0.203986	-0.194249	0.344816	microtubule nucleation [GO:0007020]	cytoplasm [GO:0005737];microtubule [GO:0005874];microtubule organizing center [GO:0005815];spindle pole [GO:0000922]	gamma-tubulin binding [GO:0043015]	+	3	3	3	4.2	4.2	4.2	80.6	0.0033021	2.0431	448050000	12	16575000	21288000	19367000	10184000	31471000	35113000	17430000	37725000	7613200	2228500	221750000	3382300	0	1713200	0	1332100	4121000	1356500	4032200
-2.57812	-1.39196	-1.43625	-0.5422	0.339553	0.822004	0.792772	0.483203	0.900029	0.0733207	0.191693	0.565319	0.0499676	0.962671	0.313067	0.454936			aspartic-type endopeptidase activity [GO:0004190]	+	7	7	7	16.1	16.1	16.1	50.214	0	26.925	2923500000	74	126030000	98650000	15064000	87702000	145300000	174120000	114540000	191710000	79403000	100790000	91551000	61427000	71913000	113290000	109600000	176090000	199860000	103550000	145980000
0.922525	-0.990733	1.14333	0.797741	0.742265	0.259958	-0.347255	0.503432	-0.447208	-0.478147	-2.71571	-1.08702	0.853495	-0.104727	0.305072	0.642987	carbohydrate metabolic process [GO:0005975]	integral component of membrane [GO:0016021]	beta-galactosidase activity [GO:0004565]	+	39	32	30	46.4	40.1	38	88.405	0	279.18	19124000000	242	70130000	63285000	410730000	34258000	51544000	95419000	74824000	71485000	1507000000	1278300000	1740700000	1405000000	820110000	674480000	1101600000	1123100000	873070000	745690000	782980000
-1.09296	-0.738844	-0.0435182	-0.242499	-0.581769	1.35803	1.07988	-0.983745	1.21755	1.22008	1.04962	1.09896	-1.0192	-0.548294	-0.299225	-1.47407	protein transport [GO:0015031]			+	3	3	3	12	12	12	27.473	1	-2	135620000	3	0	0	0	7149700	0	15283000	0	0	0	0	0	0	0	20233000	22146000	15942000	12337000	13254000	18609000
-0.867589	-0.586557	0.0216103	-0.0162252	0.011081	-0.611661	0.0805914	0.972939	-0.215152	-1.69131	-1.52994	-0.660344	0.751616	1.53289	1.27303	1.53501	autophagy [GO:0006914];protein transport [GO:0015031]	cytoplasm [GO:0005737]	cysteine-type peptidase activity [GO:0008234]	+	10	10	9	34.8	34.8	31.2	43.235	0	60.132	1595700000	50	170760000	140390000	142270000	121220000	136020000	193930000	150670000	173530000	21315000	13582000	41194000	24413000	18381000	12601000	23479000	25601000	25679000	3775100	5594900
1.32609	1.38944	1.21447	1.84261	-1.30927	-1.02526	0.287557	-0.793032	0.753743	-0.942612	-0.691564	-0.650756	-0.47332	-0.4021	-0.464725	-0.0612813	de-etiolation [GO:0009704];response to far red light [GO:0010218];seed germination [GO:0009845]	integral component of membrane [GO:0016021];perinuclear region of cytoplasm [GO:0048471]	hydrolase activity, acting on carbon-nitrogen (but not peptide) bonds [GO:0016810]	+	3	3	3	7.5	7.5	7.5	63.784	0.0054093	1.7957	724430000	5	2151700	9896000	0	2735500	2518100	0	2961200	0	37125000	52273000	54077000	5726100	1070300	39653000	43144000	1856100	78595000	1362900	83520000
-1.46462	-0.684796	-0.0248181	-0.719707	-0.17582	-2.38449	0.481696	-0.620171	0.492091	0.329918	1.07537	0.44716	1.16657	-0.127033	1.17689	1.03177	nucleotide-sugar metabolic process [GO:0009225]		dTDP-glucose 4,6-dehydratase activity [GO:0008460]	+	52	20	20	65.5	32.7	32.7	75.286	0	102.06	5798900000	64	802640000	628900000	477300000	585290000	579590000	859000000	931460000	755610000	0	6163200	0	0	6908400	0	6757800	0	15819000	10009000	27029000
-1.79755	-1.39889	-0.231633	-1.13817	0.529691	0.838704	1.28725	1.80952	-0.608288	-0.725259	-0.0257164	-0.170446	-0.425803	0.545488	0.731549	0.779551				+	15	15	10	66.9	66.9	56.7	36.458	0	80.458	9624400000	134	143950000	206060000	138750000	152140000	152660000	110140000	136750000	168470000	446930000	448910000	483510000	497910000	404450000	540610000	625820000	557590000	532750000	340510000	521430000
-1.691	-1.50246	-1.40885	-1.51461	0.022426	-0.365802	0.429506	0.00771363	0.430928	0.662487	0.517644	0.451602	0.636973	1.18795	0.853531	1.28196				+	20	19	17	62.1	59.6	57.5	36.379	0	131.46	14615000000	240	727400000	624560000	558750000	513990000	738060000	578600000	654400000	559530000	327850000	274560000	232460000	233920000	383720000	450930000	572950000	492150000	732660000	306640000	897150000
1.14876	1.40951	1.35545	0.960306	-1.64286	0.0930744	-0.445123	-0.699163	-1.22632	-0.60431	-0.343887	-1.24184	0.674771	0.793789	0.553903	-0.78606				+	8	8	7	34.4	34.4	27.4	17.386	0	62.724	14111000000	165	229630000	285350000	196660000	173540000	198310000	218870000	223270000	159110000	918890000	897770000	1096100000	667790000	442150000	574660000	710830000	591940000	667830000	553340000	603620000
0.697991	1.06106	1.01806	1.32063	-0.816779	-0.987755	-1.26955	-1.74942	0.611445	-0.422453	0.122524	1.74978	-0.107903	-0.397499	-0.687241	-0.142894	calcium-mediated signaling [GO:0019722]		calcium ion binding [GO:0005509]	+	8	8	1	35.5	35.5	6.1	24.565	0	76.319	4104800000	90	96379000	90491000	99729000	104770000	77998000	190990000	106590000	85615000	263040000	252500000	380910000	290450000	108430000	91121000	126250000	93856000	262720000	105960000	202600000
-0.295398	0.685476	-0.0683292	-0.070289	-0.00253984	0.491139	0.298437	0.253384	1.10412	0.267365	1.55098	0.290254	-3.08129	-0.435221	-0.701969	-0.286117			lyase activity [GO:0016829]	+	3	2	2	12.3	9.1	9.1	41.004	1	-2	636850000	3	27287000	35392000	43501000	44861000	9850900	45588000	16436000	14083000	18868000	46591000	25292000	23066000	17933000	34076000	29023000	28044000	35622000	23204000	48725000
0.214077	0.011555	0.164822	0.0480825	0.62029	0.491199	0.660229	0.676272	-2.78115	0.36522	0.19253	-2.1945	0.344282	0.425812	0.598104	0.163173				+	5	5	5	21.7	21.7	21.7	23.504	0	4.1228	1020800000	19	92767000	75053000	52704000	54828000	136550000	138270000	119780000	130860000	16649000	17102000	18114000	7165200	28816000	8982300	10457000	10695000	0	7035200	16183000
2.03832	1.68841	1.06955	1.27601	-0.499288	-1.09946	-0.546384	0.188908	-0.0677209	-0.421815	-0.0432831	-0.162651	-0.980516	-0.571886	-1.23879	-0.629406			peptidyl-prolyl cis-trans isomerase activity [GO:0003755]	+	9	9	9	33.9	33.9	33.9	30.385	0	24.962	2493200000	51	0	0	0	0	0	0	9910400	0	243860000	163680000	248160000	325080000	51658000	64637000	114490000	116620000	157060000	44445000	296970000
-1.86087	-1.13545	-1.34053	-0.505462	0.0568241	-0.601085	0.202725	0.0692109	0.179093	-0.618709	0.604348	0.561761	0.56288	1.05198	0.54393	2.22934	cell wall modification [GO:0042545];pectin catabolic process [GO:0045490]	integral component of membrane [GO:0016021]	aspartyl esterase activity [GO:0045330];enzyme inhibitor activity [GO:0004857];pectinesterase activity [GO:0030599]	+	3	3	3	5.8	5.8	5.8	70.663	0	5.0873	1739700000	13	36295000	44861000	36996000	0	64241000	111490000	78408000	83239000	31889000	68931000	41698000	50714000	70831000	44824000	68361000	105990000	59375000	17668000	104800000
-2.0936	-1.61369	-1.27862	-1.61249	0.392601	0.384218	0.552327	0.483447	0.617648	0.804483	0.544886	0.463607	0.524053	0.641005	0.555832	0.634291	pectin catabolic process [GO:0045490]		metal ion binding [GO:0046872];pectate lyase activity [GO:0030570]	+	3	3	3	10.7	10.7	10.7	42.802	0	6.5644	422880000	6	8298400	0	7373100	0	0	0	0	0	0	0	0	0	21610000	12102000	16763000	39260000	17530000	47499000	10528000
1.52572	1.53567	1.61122	1.32923	-0.816806	-0.593802	-0.746048	-0.714595	0.138808	0.0886706	0.0954784	0.363241	-1.1453	-0.926743	-0.912115	-0.832634		extracellular region [GO:0005576]		+	21	21	20	77.3	77.3	77.3	25.925	0	172.86	15715000000	191	58287000	142430000	128800000	89833000	253250000	345890000	150020000	229530000	1654600000	1558300000	2068900000	1499000000	293990000	505990000	564590000	522690000	893530000	601220000	929050000
-1.03253	-0.584154	0.881608	0.216981	1.21034	0.12158	0.753575	0.898027	-0.386489	1.72884	0.462898	0.502428	-1.09039	-1.21852	-0.684616	-1.77958				+	10	10	10	12.4	12.4	12.4	112.2	0	7.6887	1573300000	44	8201700	8425800	0	5731500	0	12872000	0	0	79052000	104510000	123660000	118960000	75259000	115140000	75273000	110980000	105860000	101000000	116510000
0.932414	0.98248	-0.359186	-0.939257	1.21456	1.36425	0.0366695	1.29789	-0.810264	0.518911	-0.384632	-0.0938331	0.22411	-0.680798	-1.45198	-1.85133			ligase activity [GO:0016874]	+	2	2	2	7.1	7.1	7.1	33.14	0	3.5848	547170000	7	37628000	48091000	31718000	13100000	35090000	32675000	52391000	35799000	21591000	19976000	16104000	21345000	16478000	19769000	14204000	20335000	12956000	13385000	14727000
-0.129938	0.684098	1.03572	1.57189	-0.410921	-1.39999	0.073524	-0.431682	-1.51982	-1.41783	-0.868372	-0.550102	0.384109	1.00734	0.696498	1.27547	metabolic process [GO:0008152]	membrane [GO:0016020]	calcium ion binding [GO:0005509];mannosyl-oligosaccharide 1,2-alpha-mannosidase activity [GO:0004571]	+	12	12	12	18.9	18.9	18.9	71.07	0	40.694	3616200000	93	122630000	218950000	157690000	172130000	93517000	92889000	134600000	65835000	185000000	196930000	252770000	266790000	88322000	86565000	170190000	128400000	120100000	66990000	104020000
1.56949	1.65311	1.53413	1.49549	0.206614	-1.04641	-1.08417	-0.768494	-0.548499	0.0778709	-0.174658	-0.194687	-0.75985	-0.517573	-0.87842	-0.563942		integral component of membrane [GO:0016021]	oxidoreductase activity, acting on the aldehyde or oxo group of donors, disulfide as acceptor [GO:0016624]	+	20	20	19	42.7	42.7	41.2	59.377	0	194.94	3441100000	58	5062600	5815200	0	4343200	16649000	8224700	0	0	788800000	710040000	759540000	670470000	35718000	13025000	13750000	12902000	63983000	17886000	84035000
-1.68199	-1.03854	-1.77471	-1.22796	1.45865	0.727969	0.486468	0.625053	-0.297434	0.451194	-0.0735683	0.067683	1.27187	0.00999961	1.1038	-0.10849				+	8	8	8	21.8	21.8	21.8	42.323	0	5.5928	3777900000	39	74786000	85267000	125990000	57604000	113810000	74692000	43547000	203980000	31026000	28362000	17494000	144550000	327320000	310270000	226170000	260280000	31505000	172770000	197820000
-0.64321	-1.6475	-1.38685	0.692851	-1.28536	-0.932491	0.533067	-0.119648	0.45353	0.335905	0.366708	0.719761	1.55655	1.11111	-0.874682	1.12025		integral component of membrane [GO:0016021]	ATP binding [GO:0005524];protein kinase activity [GO:0004672]	+	3	2	1	3.3	2.3	1.4	100.34	0	4.0417	526670000	18	77568000	83420000	49687000	45145000	40637000	0	78854000	65493000	0	0	0	8746200	0	0	0	0	6826800	0	6315800
-0.553874	-1.0379	-1.12629	-0.660698	1.44809	0.511104	-0.278224	-0.0691514	-1.08013	-0.0982597	-0.98377	-0.998974	1.6228	0.997598	1.01763	1.29004		extracellular space [GO:0005615]		+	36	36	36	66.5	66.5	66.5	45.814	0	323.31	45969000000	524	2573000000	2884900000	2356400000	2233800000	2824000000	2614300000	2352100000	2778300000	1555600000	1331900000	1655400000	1329100000	1219300000	1116300000	1388400000	1386400000	1691600000	1121200000	1494300000
-0.224804	0.984344	-0.0954263	-0.2021	-0.43575	0.63364	-0.50575	0.721909	-1.31498	-1.67335	-1.15375	-0.970656	1.5407	0.32862	0.695931	1.67141	glucose metabolic process [GO:0006006]	integral component of membrane [GO:0016021]	NAD binding [GO:0051287];NADP binding [GO:0050661];oxidoreductase activity, acting on the aldehyde or oxo group of donors, NAD or NADP as acceptor [GO:0016620]	+	59	24	24	74.4	44.9	44.9	47.604	0	323.31	211200000000	584	0	0	6580100	0	9965900	32668000	0	0	14608000000	13348000000	15201000000	14682000000	10391000000	9906400000	10972000000	10751000000	9401300000	7048200000	8732500000
-0.0514136	-0.967612	-1.38908	-0.836085	0.521369	-0.615605	1.26925	1.4482	-0.393035	-0.937787	-1.03806	-0.944052	0.678907	1.09829	0.88104	1.27567	histone monoubiquitination [GO:0010390]	nucleus [GO:0005634]	metal ion binding [GO:0046872];ubiquitin-protein transferase activity [GO:0004842]	+	6	6	6	7.6	7.6	7.6	101.04	1	-2	2499600000	14	59788000	54760000	45182000	51911000	122370000	13934000	42959000	51512000	939880000	0	1039600000	0	0	0	12523000	16048000	0	0	5784400
-0.871396	-0.748003	0.0017887	0.40796	-0.377887	-0.668629	-0.590718	-0.182289	-0.813832	-0.877336	-0.683177	-0.594983	1.83923	2.25527	1.01639	0.887616			acyl-CoA hydrolase activity [GO:0047617]	+	5	5	5	25.2	25.2	25.2	13.835	0	4.3916	1072700000	38	128300000	106230000	89813000	82306000	104090000	125020000	110370000	120800000	4093700	15055000	5968300	5385500	3600600	12509000	13302000	13317000	12963000	3126900	14939000
1.66595	0.396582	0.553115	1.04647	0.685589	-1.09344	-0.491942	0.827965	-0.866123	0.47813	1.04143	-0.60648	-1.96447	-1.28579	-0.0281611	-0.35882	NAD metabolic process [GO:0019674];NADP biosynthetic process [GO:0006741]		NAD+ kinase activity [GO:0003951]	+	9	8	8	28.1	28.1	28.1	37.688	0	22.982	2674900000	105	63196000	90599000	54373000	72161000	53918000	78513000	66483000	70150000	163400000	126700000	196770000	113020000	139860000	100850000	72145000	120970000	146840000	91631000	154490000
0.711233	0.949631	1.32778	1.24554	-1.67813	-0.95744	-1.05223	0.808933	0.537167	-0.373391	0.12136	0.614232	-1.77162	-0.694024	-0.295197	0.506151	mRNA processing [GO:0006397]	nucleus [GO:0005634]	5'-3' exoribonuclease activity [GO:0004534];nucleic acid binding [GO:0003676];zinc ion binding [GO:0008270]	+	17	16	16	19.9	18.8	18.8	101.18	0	59.782	3515500000	78	331060000	442140000	328060000	363240000	461410000	384060000	428440000	346780000	45097000	49946000	62860000	63973000	6609600	9660400	6927000	31224000	39038000	8649600	21799000
1.2959	1.31453	-0.741781	-0.136981	-0.859499	0.472088	0.868963	1.39571	-0.134118	-0.121751	0.936246	0.448776	-1.79405	-1.09025	-1.17456	-0.679225	mRNA processing [GO:0006397]		RNA binding [GO:0003723]	+	12	12	12	16.4	16.4	16.4	85.987	0	116.34	1006400000	39	93792000	96152000	79141000	97422000	161820000	157600000	147000000	153260000	0	0	1613000	0	0	0	14584000	0	0	1281000	0
0.452716	0.247187	1.35953	0.216059	-0.617593	-0.113869	0.954295	-0.103004	0.641274	0.0109087	0.838963	1.13457	-1.11949	-2.66135	-0.708751	-0.531445			metal ion binding [GO:0046872]	+	2	2	2	11.7	11.7	11.7	31.28	0.0052337	1.8084	216130000	2	5066800	22721000	3980900	8506100	28266000	21691000	24235000	25644000	5798600	4946500	8309800	5219600	2882700	3914700	5754400	4115600	5981700	3485200	6452200
0.908223	0.688214	0.853341	-0.289283	-1.57008	0.157009	0.116952	-0.287839	-0.890726	-1.25739	-1.44516	-1.18361	1.1019	0.907327	1.12352	1.06759	rRNA processing [GO:0006364]	cytosol [GO:0005829]	catalytic activity [GO:0003824];RNA binding [GO:0003723]	+	65	65	65	77	77	77	43.266	0	323.31	481470000000	1574	50183000	49612000	124000000	59307000	45590000	132610000	186710000	95776000	36437000000	32084000000	38585000000	33164000000	21878000000	24995000000	24812000000	25506000000	24555000000	16093000000	24690000000
0.211973	0.675759	1.81334	0.281642	-1.92012	-0.77863	-0.564765	-0.0401107	0.390981	-1.9454	-0.46461	0.435022	0.504335	-0.194247	0.244785	1.35005		cytosol [GO:0005829]	serine-type endopeptidase activity [GO:0004252];serine-type exopeptidase activity [GO:0070008]	+	55	55	55	67	67	67	88.2	0	323.31	40724000000	695	1712300000	1843400000	1581800000	1499200000	1841200000	2052700000	1678800000	1675900000	1807000000	1807200000	2159400000	1850900000	1062200000	1248200000	1206200000	1417300000	1866800000	1020200000	1690500000
-0.749382	-0.891268	-0.298029	1.21692	-1.75888	-0.954007	-0.782007	-0.671852	0.02199	0.43455	1.33454	1.34065	-0.839342	1.15808	0.435841	1.00219			RNA binding [GO:0003723]	+	9	9	9	27.6	27.6	27.6	34.468	0	27.628	2452800000	68	6111800	0	0	0	0	0	10117000	0	124540000	101680000	181880000	199110000	45568000	119790000	144900000	139390000	194220000	97134000	217210000
-1.78786	-1.60918	-1.58014	-1.09211	0.049114	0.466397	0.466571	0.243388	0.180853	0.0731879	0.0540965	0.15734	0.944945	1.33027	0.842061	1.26107			thiosulfate sulfurtransferase activity [GO:0004792]	+	18	17	17	69.5	67.3	67.3	29.451	0	118.19	11542000000	195	339880000	266960000	346840000	190850000	507660000	543470000	500910000	511780000	285070000	261020000	326960000	306770000	400140000	455140000	493020000	502920000	618460000	406770000	533230000
0.771271	0.691822	0.581918	1.14942	-0.45587	-0.35505	-1.74892	-1.84696	0.916805	0.71701	0.418171	0.645736	-1.85549	0.251697	0.0192481	0.0991874			GTP binding [GO:0005525];hydrolase activity [GO:0016787]	+	4	4	4	13	13	13	42.939	0.0031216	2.0528	183040000	8	0	0	0	0	0	0	0	0	31375000	18146000	27296000	29762000	0	0	0	0	3357200	2725300	31570000
-1.92971	1.011	-0.807595	0.0480272	-1.05464	-0.295992	-0.285345	-0.452408	-0.817322	0.74571	-0.5129	0.144607	-0.196044	1.36435	1.30679	1.73147				+	6	6	6	10.3	10.3	10.3	68.961	0	11.346	8144600000	35	60007000	46862000	24102000	15637000	48221000	81037000	55967000	31439000	352440000	588780000	472560000	514900000	294160000	400900000	416120000	406680000	429640000	430320000	462390000
0.725546	1.60543	0.517025	0.571322	-0.936695	-1.67985	-1.36861	-1.82609	0.444423	0.786959	0.23266	0.203332	0.238871	-0.620483	0.0897522	1.0164	leucine biosynthetic process [GO:0009098]		3-isopropylmalate dehydrogenase activity [GO:0003862];magnesium ion binding [GO:0000287];NAD binding [GO:0051287]	+	31	15	11	52.5	32.7	25.3	45.77	0	145.97	5977900000	106	196150000	91129000	59930000	61925000	62168000	138330000	73026000	136390000	491010000	432960000	468250000	356320000	104630000	128420000	173070000	148030000	460020000	232630000	304930000
0.0855605	-0.0852758	-0.267198	1.17493	0.988518	1.15767	0.248119	1.06352	-0.632429	-2.78404	0.131808	-1.03654	0.176614	-0.747529	0.424992	0.101282				+	12	9	9	10.9	9	9	152.24	0	37.023	4771800000	23	121930000	67401000	55919000	77054000	144220000	191420000	3909800000	161180000	1826100	1546700	0	0	1911500	2369200	1650400	2382100	0	0	1826800
-1.45271	-1.06092	-1.98152	-1.19444	-0.136617	-0.0477471	-0.219622	-0.148319	0.799334	1.46388	0.757412	1.44196	0.523251	0.214656	0.62772	0.413683	lipid metabolic process [GO:0006629]		aspartic-type endopeptidase activity [GO:0004190]	+	31	31	31	64.4	64.4	64.4	56.036	0	323.31	92566000000	428	10718000000	10552000000	7759300000	8917600000	12164000000	13167000000	10083000000	12411000000	202880000	349540000	216770000	193560000	254380000	368350000	368140000	447860000	561770000	524270000	513090000
0.179575	0.063041	-0.0479326	0.418502	-0.708142	0.100477	-0.637553	1.16326	1.13172	1.09085	0.635154	1.37585	-1.36731	-2.2564	-0.831359	-0.309727		ribosome [GO:0005840]	rRNA binding [GO:0019843];structural constituent of ribosome [GO:0003735];translation elongation factor activity [GO:0003746]	+	3	3	3	13	13	13	25.46	0	6.2972	853370000	11	0	0	0	0	0	11584000	11206000	0	93601000	101660000	31441000	51472000	33500000	47919000	36577000	29145000	116700000	60663000	83806000
0.312072	-0.816502	-2.18176	-1.6204	0.0604804	0.861862	0.915881	1.11252	0.305738	-1.03159	-0.376309	0.847095	1.04002	0.853341	-0.424631	0.142177	endonucleolytic cleavage of tricistronic rRNA transcript (SSU-rRNA, 5.8S rRNA, LSU-rRNA) [GO:0000479];maturation of SSU-rRNA from tricistronic rRNA transcript (SSU-rRNA, 5.8S rRNA, LSU-rRNA) [GO:0000462]	90S preribosome [GO:0030686];nucleus [GO:0005634]	GTP binding [GO:0005525];GTPase activity [GO:0003924];U3 snoRNA binding [GO:0034511]	+	7	7	7	6.2	6.2	6.2	134.43	0	4.122	12404000000	34	175690000	12703000	194050000	225340000	235240000	167490000	221670000	243400000	637860000	874330000	599130000	467130000	1427700000	1488800000	1680200000	2029000000	87971000	927410000	70494000
-0.647785	1.27086	0.870788	1.25967	-0.95953	0.210844	-0.787481	-1.01721	1.23395	1.01808	0.948925	0.455112	-1.46513	-0.364181	-1.0226	-1.00431		integral component of membrane [GO:0016021]	ATP binding [GO:0005524];protein kinase activity [GO:0004672]	+	14	12	10	16.5	14.7	13.4	98.329	0	54.865	2751900000	45	377490000	159520000	172450000	74889000	344080000	551490000	478030000	448640000	0	23564000	41191000	24107000	0	0	0	0	21858000	7064100	22322000
0.614381	-0.551784	0.0613047	-0.589979	1.32908	1.12875	-0.848756	1.98185	-0.543032	1.15309	-0.530658	-0.077296	-0.0475121	-1.77132	-0.223916	-1.08421	ribosomal large subunit biogenesis [GO:0042273]	nucleolus [GO:0005730];preribosome, large subunit precursor [GO:0030687]		+	9	9	9	21.5	21.5	21.5	52.341	0	11.382	1114700000	23	118300000	100280000	73525000	74760000	264980000	226430000	113880000	125890000	0	0	0	0	5522000	4256100	0	3066400	0	3818900	0
0.336055	0.372294	-1.78203	-2.80468	0.990256	0.613784	-0.225352	0.670222	0.580694	0.874681	0.593881	-0.0868347	0.389876	-0.458971	-0.137049	0.0731692	phosphatidylinositol phosphorylation [GO:0046854];phosphatidylinositol-mediated signaling [GO:0048015]		kinase activity [GO:0016301]	+	25	25	25	14.4	14.4	14.4	223.34	0	61.416	3243900000	88	379920000	411360000	269560000	310780000	345600000	328200000	280070000	389400000	32429000	79727000	0	0	16404000	25415000	44481000	10338000	9324000	43618000	9755900
1.08934	1.47828	0.84873	0.92503	0.906345	-0.608105	0.316749	0.305474	0.477542	0.218217	-1.76576	-1.12209	-0.485442	0.0980502	-1.63416	-1.04819				+	5	5	5	26.1	26.1	26.1	20.073	0	8.1764	940570000	27	74489000	116590000	44997000	85339000	77904000	65762000	29722000	84370000	18542000	18551000	34488000	43194000	12537000	10085000	25120000	35196000	34285000	10480000	20704000
-1.73447	-0.774201	-0.258615	-0.827411	1.41578	1.06877	1.72067	0.783221	-0.921933	-0.386394	-1.21955	-0.527016	0.468491	-0.141416	0.55252	0.781558				+	48	48	43	74.5	74.5	72.4	55.837	0	323.31	154160000000	964	39288000	58274000	50238000	51587000	391310000	187830000	155540000	130540000	9035900000	9030500000	10138000000	9576600000	9131600000	9745900000	8686400000	10381000000	8180800000	7597300000	8479000000
1.04742	-0.217141	-0.567264	-0.626673	1.3181	0.154051	0.0472381	1.21286	-1.84278	-1.30943	-1.16945	0.0803358	1.16905	0.0141791	-0.6086	1.29811			sirohydrochlorin cobaltochelatase activity [GO:0016852]	+	5	5	5	36.1	36.1	36.1	24.103	0	16.361	975910000	28	4240500	0	0	0	0	0	0	0	40557000	61997000	83079000	62190000	57322000	56307000	47326000	71163000	21975000	31306000	39039000
0.0221615	-0.199431	0.577796	1.15083	1.41503	1.91894	-0.369462	0.472431	0.259524	0.28744	-1.46584	-0.994411	-1.55212	-0.189479	-1.23046	-0.102962		chloroplast [GO:0009507]		+	6	6	6	27.9	27.9	27.9	20.405	0	23.932	2514600000	39	0	0	0	0	0	0	0	0	185780000	169880000	236910000	217360000	142530000	154750000	133250000	147750000	152880000	108020000	158050000
-0.153464	-0.510792	0.724165	0.950872	-0.720725	1.54787	0.537052	-0.228057	-0.230983	-1.33689	-0.532919	-2.10627	0.550178	0.380504	-0.527248	1.65672	DNA repair [GO:0006281]		class I DNA-(apurinic or apyrimidinic site) endonuclease activity [GO:0140078];DNA binding [GO:0003677];endonuclease activity [GO:0004519];metal ion binding [GO:0046872]	+	5	5	5	9.3	9.3	9.3	59.435	0	8.3443	1593000000	33	6545400	10790000	0	19178000	3093000	26624000	20372000	0	72618000	86094000	92809000	121880000	99593000	73423000	90330000	96597000	78116000	100010000	67758000
-0.170347	-1.3796	-0.687808	-2.84468	0.528463	-0.708057	0.636684	0.960197	0.409425	0.115269	0.429384	0.0294877	0.95428	0.707078	0.730632	0.289592			ATP binding [GO:0005524];helicase activity [GO:0004386];nucleic acid binding [GO:0003676]	+	9	9	9	10.9	10.9	10.9	114.64	0	24.185	1394800000	57	53625000	38582000	61485000	49283000	193440000	142280000	115420000	205470000	26278000	3972400	14174000	0	35910000	5505400	43004000	44940000	43464000	28453000	36796000
-1.51868	-1.52357	-1.65839	-1.54409	-0.297534	-0.0619149	0.292389	0.239656	0.846911	1.15779	0.638456	0.908269	0.415839	0.580457	0.904515	0.619902	NAD biosynthetic process [GO:0009435]		nicotinate phosphoribosyltransferase activity [GO:0004516];nicotinate-nucleotide diphosphorylase (carboxylating) activity [GO:0004514]	+	29	29	15	53.7	53.7	34.9	60.982	0	133.78	15659000000	285	704440000	720070000	649790000	572610000	690660000	810900000	665300000	828750000	510930000	416480000	541860000	431060000	452330000	570430000	473610000	637790000	790910000	480820000	793220000
-2.56453	-1.18919	-0.147226	-0.312458	0.338699	0.680793	2.08946	0.186045	0.00775507	-0.242667	0.341236	0.849232	-0.555235	0.80482	-0.236625	-0.0501143				+	3	3	3	7.8	7.8	7.8	50.839	0	3.2767	336010000	17	7251700	13571000	12015000	9156500	22077000	21364000	19607000	17306000	6128400	11312000	10850000	9575500	7682900	15376000	20060000	13673000	15663000	6747100	11074000
-2.83948	-0.759582	-1.37064	0.593446	1.02424	0.984438	0.20617	-0.73054	0.489952	0.167579	0.079634	0.529343	0.0706269	0.84914	0.300533	0.405143	regulation of transcription, DNA-templated [GO:0006355]		histone binding [GO:0042393]	+	3	2	2	11.4	7.5	7.5	29.156	0	4.3345	389560000	9	73404000	63600000	0	43828000	0	32575000	26521000	102750000	0	0	0	4765400	9670100	10812000	0	0	4458500	0	3504500
-1.63571	-1.32136	-1.09006	0.176955	-0.171094	-0.0713375	1.5226	-0.275809	-0.624952	0.636381	-0.230845	-0.286645	-0.0702383	1.65223	1.80668	-0.0167999				+	12	9	8	38.2	30.3	30.3	27.049	0	62.508	7566700000	85	0	0	6424300	0	8511300	0	9355700	12989000	256750000	281590000	337350000	333930000	331310000	458280000	534060000	508570000	426540000	250730000	552780000
-2.0408	-1.65787	-1.1948	0.186222	0.486392	0.404721	0.762837	0.705158	0.384734	-1.65266	0.514349	0.674013	0.640491	0.380481	0.669778	0.736951	intracellular protein transport [GO:0006886];vesicle-mediated transport [GO:0016192]	clathrin adaptor complex [GO:0030131]		+	8	8	8	21.8	21.8	21.8	61.641	0	33.699	1890600000	32	212820000	204710000	118670000	166370000	175270000	261880000	221600000	222520000	0	0	0	11594000	12305000	20628000	43541000	23442000	55527000	0	17701000
0.936395	2.05543	1.18698	1.33372	0.165403	0.111886	-1.09735	-0.0701558	-0.752123	0.615764	-1.12064	-0.507855	-1.19449	-0.887209	-0.881943	0.106182	protoporphyrinogen IX biosynthetic process [GO:0006782];uroporphyrinogen III biosynthetic process [GO:0006780]		uroporphyrinogen-III synthase activity [GO:0004852]	+	24	24	24	53.2	53.2	53.2	31.884	0	233.65	55491000000	251	2182900000	1871900000	1766800000	2134400000	1766500000	2217000000	1646300000	1692700000	2529800000	2835300000	2834200000	2691400000	2216800000	2130000000	2117700000	2359700000	2315400000	2200600000	2186900000
-0.671112	0.016323	-1.54514	-3.10117	0.424414	0.655561	0.323346	0.48407	0.424703	0.588819	0.583376	0.386303	0.487444	0.429801	0.368776	0.144489		integral component of membrane [GO:0016021]		+	5	5	5	16.1	16.1	16.1	50.33	0	5.2472	326110000	7	0	0	0	0	0	0	0	0	0	6447300	0	0	20511000	41916000	12414000	25468000	40430000	21710000	35761000
-1.37229	-0.105497	-0.17732	1.67548	-0.545439	-1.10222	-1.37461	0.191925	0.00475089	-0.621085	-0.883419	-0.317137	0.906412	1.40395	0.951231	1.36527			hydrolase activity [GO:0016787]	+	4	4	4	13.3	13.3	13.3	52.717	0	19.434	374890000	10	23162000	23629000	8558000	24120000	35155000	61954000	51248000	38123000	0	3861700	4177100	21992000	0	0	0	0	0	0	0
1.47553	1.60269	1.346	-0.342445	-0.535028	-0.541527	0.347509	-0.727607	-1.45976	0.84171	0.642701	-0.307666	-0.396242	-1.85604	0.222009	-0.311843			calcium ion binding [GO:0005509]	+	3	3	3	22.8	22.8	22.8	16.359	0	9.0477	509290000	8	72502000	41365000	23415000	30376000	0	17469000	27355000	13665000	73344000	106240000	56063000	0	0	4843400	3021000	0	0	20034000	7067700
1.42026	1.56518	1.65515	1.73571	-0.515874	-0.39405	-1.1607	-0.462766	-0.452174	-0.338365	-0.839826	-0.0481239	-0.73247	-0.30755	-0.0580809	-1.06632			hydrolase activity [GO:0016787]	+	16	16	16	51.6	51.6	51.6	25.512	0	82.805	3198000000	48	47756000	52060000	20565000	18520000	76291000	106300000	39627000	64028000	698400000	617360000	764080000	616850000	13211000	0	0	0	4957800	21799000	8200200
0.0792736	0.59454	-1.65381	-0.687856	-0.878774	-0.803725	-0.304907	0.209881	0.67119	-1.28678	0.43876	-1.23084	0.924715	1.15488	1.26813	1.50532	intracellular protein transport [GO:0006886];vesicle-mediated transport [GO:0016192]	clathrin adaptor complex [GO:0030131]		+	40	7	7	47.2	11.9	11.9	88.481	0	27.726	3628600000	54	381920000	232380000	280560000	303760000	423380000	347270000	458760000	431970000	55283000	49261000	37753000	57644000	19084000	13357000	20314000	46383000	53150000	17474000	59178000
-1.88007	-1.69386	-1.92309	0.380304	0.113484	0.114538	0.435775	0.279088	1.04053	0.461001	1.36723	1.02145	0.103371	-0.331554	0.257562	0.254246	signal transduction [GO:0007165]		ADP binding [GO:0043531]	+	23	23	18	17.7	17.7	14	163.33	0	19.189	1783000000	61	17738000	32435000	6013900	22778000	0	0	0	0	11498000	12410000	11774000	103520000	77488000	116940000	112540000	99037000	152780000	123200000	194810000
-1.53201	-2.34627	-0.104226	-0.930081	-0.073418	-0.216588	-0.0425583	-0.394108	0.57426	0.84097	1.21882	0.82402	0.961344	-0.570567	0.960625	0.829785		endoplasmic reticulum membrane [GO:0005789];integral component of membrane [GO:0016021]	flavin adenine dinucleotide binding [GO:0050660];FMN binding [GO:0010181];NADP binding [GO:0050661];NADPH-hemoprotein reductase activity [GO:0003958]	+	18	18	17	26.7	26.7	26	85.988	0	24.915	2730500000	74	113690000	197680000	128370000	183740000	127110000	118070000	153410000	77759000	139280000	118820000	123120000	140850000	94706000	96737000	126170000	80363000	102420000	54754000	121200000
1.30819	1.34349	1.39485	1.31697	-0.688198	-0.737443	-0.82446	-0.640341	0.509144	0.515309	0.384696	0.48593	-1.02719	-1.02846	-1.17746	-1.13502	carbohydrate metabolic process [GO:0005975]		hydrolase activity, hydrolyzing O-glycosyl compounds [GO:0004553]	+	21	21	21	71.7	71.7	71.7	34.653	0	323.31	107200000000	588	8901200000	7696800000	6368400000	6200100000	9047900000	7828400000	9279600000	8904500000	6499700000	5773600000	7465900000	6911400000	545330000	790480000	789940000	813790000	2869500000	2100300000	2708100000
0.0705266	-0.483256	0.591677	0.223219	-0.275916	-0.290119	-0.350689	-3.41391	0.0149448	0.511841	0.820015	0.860957	0.378122	0.456483	0.400249	0.485861				+	5	5	5	24.6	24.6	24.6	21.171	0	5.8976	1140100000	26	94245000	116000000	45614000	88224000	92224000	80117000	142790000	86335000	25906000	20835000	42232000	10429000	11968000	5992300	15198000	0	22909000	16687000	45632000
-1.90403	-1.22767	-1.4451	-1.91955	0.635204	0.427985	0.533893	0.369982	0.481086	0.08946	0.574169	0.364198	0.513634	0.848948	0.715996	0.941797				+	3	3	3	8	8	8	40.244	0	5.007	408750000	20	0	0	0	0	8461700	0	0	3069900	0	0	3768900	0	31022000	21618000	33153000	23746000	26901000	7806700	37401000
0.607501	2.01668	0.504047	0.59918	-0.716817	-0.921211	-0.63849	-0.229245	0.345466	1.94144	-0.0110322	0.448582	-1.14078	-1.07117	-1.07432	-0.659835	protein import [GO:0017038];protein targeting [GO:0006605]	membrane [GO:0016020]	ATP binding [GO:0005524]	+	88	88	88	65.8	65.8	65.8	115.31	0	323.31	52439000000	867	54809000	100570000	74139000	124850000	73488000	74620000	62762000	69266000	4110800000	3865000000	4234500000	3851500000	2153200000	2321700000	2481900000	2720500000	4324700000	2747800000	3837500000
-0.535085	-0.265413	-2.62073	-0.675991	1.19858	0.59689	-0.596911	0.0886854	-0.0773248	2.07089	0.639196	-0.257213	0.474753	0.304211	-0.0873262	-0.257213	transcription, DNA-templated [GO:0006351]		chromatin binding [GO:0003682]	+	6	6	6	9	9	9	55.471	0.0052365	1.8158	701760000	21	52435000	60489000	54006000	53049000	56630000	87680000	70218000	68588000	5194100	4027700	0	4548600	56942000	20578000	7929500	4177200	12176000	16590000	14470000
1.5599	-0.431705	0.137214	-0.345148	1.78054	-0.0328716	0.154884	0.173424	1.91432	-0.193075	0.246206	-0.883508	-1.20075	-1.34885	-0.908961	-0.621621		90S preribosome [GO:0030686];nucleolus [GO:0005730];small-subunit processome [GO:0032040]		+	7	7	7	3	3	3	297.52	0.0057627	1.7656	944090000	14	4858100	5387800	3859600	7091800	46199000	42311000	24402000	43395000	77784000	60967000	87615000	22737000	50718000	66953000	39182000	39958000	88895000	27735000	60562000
-0.589738	-0.751235	0.0646815	-0.403239	-0.766429	-1.36222	1.09443	-0.974955	-1.13408	-1.30659	1.03215	0.96926	1.09565	1.19992	0.995201	0.837196			palmitoyl hydrolase activity [GO:0098599]	+	2	2	2	7.2	7.2	7.2	27.822	0.0067712	1.6213	578220000	5	185650000	72237000	20851000	16735000	15780000	11226000	31517000	83040000	0	0	0	0	0	0	21072000	0	0	0	22014000
0.86562	0.729882	1.46816	0.74359	-2.97534	0.398211	0.0775963	0.257427	0.126049	0.0845218	0.0350649	0.0941955	-1.00396	-0.0129499	-0.939253	0.0511779				+	7	7	7	38.3	38.3	38.3	17.329	0	32.23	9200000000	14	3146600	0	0	0	0	0	3105300	0	1005900000	922760000	269030000	870860000	0	904250000	486160000	710300000	618310000	406870000	518970000
0.216478	-1.69445	-1.74197	-0.0920869	0.507564	0.52288	0.590122	0.418084	0.120639	0.0825285	-1.60618	-0.921123	1.88516	0.52907	0.564246	0.61904			peptidyl-prolyl cis-trans isomerase activity [GO:0003755]	+	2	2	2	14.3	14.3	14.3	17.858	0.00057252	2.7189	344720000	10	0	0	0	0	0	0	0	0	19316000	0	0	0	6301900	29488000	33788000	7119200	16628000	11680000	0
-0.0238209	0.0274565	0.154645	0.743089	-1.81011	-1.98249	-0.553945	-0.720061	1.34026	-1.23743	0.562547	0.741644	0.905974	0.418731	0.422776	1.01073	cell wall organization [GO:0071555]	cell wall [GO:0005618];extracellular region [GO:0005576];integral component of membrane [GO:0016021]	hydrolase activity [GO:0016787]	+	6	6	6	20.4	20.4	20.4	48.499	0	22.917	1541900000	60	0	0	7465900	0	0	0	0	0	74739000	130850000	139290000	62226000	37745000	45543000	73608000	77478000	131080000	41861000	100650000
1.41156	1.74727	1.32179	1.24147	-0.770279	-1.20121	-1.69968	-0.720593	-0.197979	-0.392649	-0.161681	0.236205	-0.382274	-0.463342	-0.525192	0.556592		cytoplasm [GO:0005737]	metal ion binding [GO:0046872];metalloaminopeptidase activity [GO:0070006]	+	49	49	49	73	73	73	72.874	0	323.31	81299000000	746	4700900000	4754500000	3917700000	3964800000	3447500000	3622800000	3807500000	3556600000	3953500000	3606700000	4581800000	3669800000	2381100000	2233900000	2050400000	2331500000	3463300000	2331800000	3349600000
0.872965	0.436622	-1.10624	0.994346	1.31632	0.637284	0.730479	0.830369	-0.767021	-0.972035	-1.857	-1.07911	-0.847125	-0.690908	0.699331	0.801719	deoxyribonucleoside triphosphate catabolic process [GO:0009204];nucleotide metabolic process [GO:0009117]	cytoplasm [GO:0005737]	dTTP diphosphatase activity [GO:0036218];metal ion binding [GO:0046872];NADH pyrophosphatase activity [GO:0035529];nucleotide binding [GO:0000166]	+	2	2	2	9.1	9.1	9.1	23.913	0.00094447	2.5479	754190000	13	39409000	84870000	93218000	81367000	51436000	97404000	78734000	68987000	21389000	0	0	24545000	27102000	12742000	16080000	17220000	0	0	0
1.06912	0.978865	1.03033	0.796917	-1.36224	0.856055	-1.09131	0.881389	0.958283	-0.946954	0.976419	-0.862383	-1.08482	-1.1333	-0.305225	-0.761138			ATP binding [GO:0005524];protein kinase activity [GO:0004672]	+	7	4	4	11.7	7.8	7.8	76.07	0.0036463	1.9459	613610000	4	27229000	0	10831000	13893000	12534000	16328000	35464000	33904000	49408000	35524000	41601000	30999000	15364000	31794000	14252000	32804000	43763000	34006000	48946000
-0.454719	-0.412526	-1.58909	-0.36663	0.958739	-0.716278	-0.0243684	-1.57723	0.704808	-0.0877111	-0.452168	-0.549957	1.5929	1.39879	1.5929	-0.0174625	CTP biosynthetic process [GO:0006241];'de novo' CTP biosynthetic process [GO:0044210];glutamine metabolic process [GO:0006541];pyrimidine nucleobase biosynthetic process [GO:0019856]		ATP binding [GO:0005524];CTP synthase activity [GO:0003883];identical protein binding [GO:0042802]	+	15	14	14	31.1	28.7	28.7	63.544	0	29.353	3130600000	68	291760000	334620000	369590000	389470000	378550000	366260000	412600000	423600000	4978800	0	0	8553600	18348000	0	9961600	0	16139000	5327400	0
-1.30358	-0.928007	0.0128682	-0.046191	2.25784	0.760894	0.651958	0.991921	-0.604991	-1.5067	-1.3012	0.280642	0.822264	-0.227981	0.390623	-0.250364	defense response [GO:0006952]	extracellular region [GO:0005576]	kinase activity [GO:0016301]	+	7	7	7	22.2	22.2	22.2	27.016	0	17.229	1993900000	24	0	3267100	0	0	0	0	0	5551600	67183000	91950000	137220000	49478000	119390000	177970000	136040000	173180000	144370000	25688000	103110000
-0.265416	0.00473877	0.311923	0.817567	-0.667976	-1.00505	-0.951139	-0.0937597	1.26432	1.20229	1.56256	1.5486	-0.579723	-1.41473	-1.05293	-0.681272	polysaccharide catabolic process [GO:0000272]		amylopectin maltohydrolase activity [GO:0102229];beta-amylase activity [GO:0016161]	+	8	8	8	18.4	18.4	18.4	50.142	0	12.938	740780000	24	0	0	0	0	0	0	0	0	54855000	51929000	23506000	49136000	9942000	7487300	18673000	12324000	117540000	62265000	135840000
1.55926	0.904989	0.089174	0.902212	0.243691	0.330751	0.659201	0.206386	-0.886862	0.0542684	-0.202611	-0.412453	-0.326856	-0.218284	-3.01882	0.115953				+	15	15	15	39.9	39.9	39.9	34.77	0	59.973	7010200000	111	21575000	9274000	4176100	8755100	8723300	7275100	8399900	10372000	615460000	530860000	558520000	618720000	321180000	316260000	421060000	408180000	402480000	322110000	401590000
-0.702533	0.252502	-0.197476	-0.21436	0.365889	0.801087	0.650703	1.31073	-1.536	0.209794	-2.20572	-1.16971	0.288219	1.26877	-0.163288	1.04139			metal ion binding [GO:0046872];oxidoreductase activity [GO:0016491]	+	3	3	3	13.6	13.6	13.6	26.428	0	3.8097	1211000000	27	37905000	38924000	57121000	46475000	39408000	81019000	44994000	71696000	61781000	37183000	39038000	57283000	29546000	37668000	37662000	52089000	41786000	28026000	22459000
-0.448759	-0.108827	-1.33389	-0.239159	-0.133474	-0.163467	0.0392522	0.382931	-0.342846	-0.800608	-1.5389	-0.9371	1.48103	1.72838	1.7799	0.635542	xylan catabolic process [GO:0045493]	cell wall [GO:0005618]	endo-1,4-beta-xylanase activity [GO:0031176]	+	8	8	8	18.8	18.8	18.8	64.946	0	12.76	1400000000	30	28731000	23659000	0	16565000	22632000	0	0	0	68704000	99255000	50249000	44821000	54794000	68888000	82319000	150620000	33180000	29564000	25113000
0.174905	0.14043	-1.94619	-1.84929	0.637074	0.848855	-1.08378	0.544584	0.844239	0.873697	0.727745	0.586486	0.327898	0.448745	-1.55223	0.276825		integral component of membrane [GO:0016021]	ATP binding [GO:0005524];protein kinase activity [GO:0004672]	+	3	3	3	4.3	4.3	4.3	80.468	0.0014859	2.2704	1354300000	6	108520000	111300000	119390000	125570000	179220000	227950000	181680000	195610000	5567200	4809100	0	0	10322000	13216000	0	8534600	10571000	11749000	6001500
-1.65192	-1.80344	-1.13247	-1.2852	0.737667	1.27615	1.20459	1.21534	-0.170837	-0.428938	0.102246	0.331218	0.387034	0.397707	0.357809	0.463039				+	82	82	82	60.3	60.3	60.3	99.643	0	323.31	64097000000	798	2838600000	3353300000	2901500000	2499400000	5071100000	5107600000	4405900000	5407400000	1219800000	1166800000	1405400000	1897400000	1743100000	2213100000	2844200000	2925000000	1849800000	1604900000	1908800000
-2.29985	0.0473235	-0.738469	-1.29617	1.22555	0.382457	0.788839	0.728436	-0.82978	0.611354	-0.856643	-0.709798	0.698942	0.387725	1.01126	0.848818				+	11	11	11	20.7	20.7	20.7	70.971	0	66.625	5463300000	104	40140000	31017000	28485000	26404000	29578000	29687000	27866000	31396000	162280000	267040000	326590000	271500000	284330000	302520000	351150000	342830000	281340000	234160000	308260000
-1.59493	-1.69496	-1.68506	-1.70353	0.554364	0.467492	0.41886	0.537511	0.731127	0.671588	0.671714	0.69249	0.493689	0.457782	0.487751	0.49411	carboxylic acid metabolic process [GO:0019752]		transferase activity, transferring acyl groups, acyl groups converted into alkyl on transfer [GO:0046912]	+	49	44	43	74.2	69.7	69.7	58.381	0	323.31	36346000000	374	445680000	376880000	209850000	307480000	989300000	1108300000	1004700000	856470000	213350000	84139000	213560000	78468000	1882000000	1964600000	2160800000	2409800000	2924700000	2054100000	3204700000
0.750449	0.0458091	0.295069	0.275089	-1.01181	-1.70892	0.696155	0.911221	-0.253178	-2.46709	-0.125772	-0.380227	1.05041	0.93408	0.838753	0.149957			peptidyl-prolyl cis-trans isomerase activity [GO:0003755]	+	16	16	16	57.9	57.9	57.9	31.385	0	253.23	17410000000	152	15094000	17736000	5706100	37792000	20500000	16585000	10943000	13692000	1387700000	969810000	1006600000	1090600000	868000000	1017400000	1033300000	1094100000	925760000	566610000	878910000
-0.769838	-0.900388	-1.00564	-1.05477	0.815974	1.21512	0.576031	0.649899	-0.871385	-1.13282	-0.859274	-0.976499	1.23098	0.866075	1.3531	0.863447	glucan catabolic process [GO:0009251]		beta-glucosidase activity [GO:0008422]	+	27	26	26	44.7	43.7	43.7	74.343	0	240.32	17552000000	273	84931000	104570000	60835000	77644000	87370000	137720000	96641000	103560000	826620000	800740000	1092300000	919660000	838290000	1235000000	1231700000	1239900000	895970000	376280000	848630000
0.945612	1.20697	1.05405	0.929143	-1.41926	-0.754596	0.649085	-0.89035	-1.86203	-1.33572	0.700778	0.544077	0.303859	0.412913	0.236447	-0.720985	COPII vesicle coating [GO:0048208];protein transport [GO:0015031]	endoplasmic reticulum [GO:0005783];Golgi membrane [GO:0000139]		+	9	7	7	9.4	6.9	6.9	115.68	0.00075988	2.6255	570020000	14	31366000	31822000	82579000	26192000	85062000	86328000	40540000	51362000	38427000	18049000	17069000	13140000	0	0	7742400	0	4728300	0	9679000
-0.0924818	-0.66699	-0.521844	-1.07534	0.798759	1.00704	0.992229	1.07074	-1.44423	0.342084	0.0224155	-1.68699	0.741215	-1.38465	0.855257	1.04278				+	3	3	3	5.3	5.3	5.3	74.111	0.00057307	2.74	308190000	8	43496000	17941000	8468500	0	20050000	58231000	30913000	48542000	0	0	0	0	6823300	9533200	9738500	10595000	5662800	0	5773500
-2.62102	-0.0780715	-0.618057	-0.827445	0.460478	-0.133186	0.195375	-0.34935	0.841336	0.936371	0.972633	0.900137	-1.15443	-0.115811	0.197706	1.39334		integral component of membrane [GO:0016021]	zinc ion binding [GO:0008270]	+	1	1	1	3.4	3.4	3.4	46.718	1	-2	2084300000	2	11450000	15238000	16296000	19210000	17548000	14741000	11185000	13454000	59983000	114440000	114150000	98160000	103520000	100330000	114290000	98717000	158770000	116910000	166740000
-2.02858	-1.68349	-1.58222	-1.17331	0.481444	0.265781	0.621165	0.597047	0.230321	0.685717	0.0236421	0.57428	0.652557	0.680262	0.745279	0.910102	carbohydrate metabolic process [GO:0005975]		carbohydrate binding [GO:0030246];hydrolase activity, hydrolyzing O-glycosyl compounds [GO:0004553]	+	61	61	61	51.2	51.2	51.2	107.39	0	301.97	65011000000	588	3586300000	3714700000	2804100000	2772900000	4409100000	4594400000	3989000000	3994200000	2138600000	1575600000	2239100000	1945500000	2021500000	1913800000	2254400000	2365200000	2701400000	505500000	2349100000
0.130244	-0.521643	0.220054	0.938678	-0.928189	-0.651949	-1.02569	-2.09011	2.02821	-0.333443	1.47979	0.469526	-0.395085	-0.0558696	0.298895	0.43658	L-methionine salvage from methylthioadenosine [GO:0019509];L-methionine salvage from S-adenosylmethionine [GO:0019284]	cytoplasm [GO:0005737]	2,3-diketo-5-methylthiopentyl-1-phosphate enolase activity [GO:0043715];2-hydroxy-3-keto-5-methylthiopentenyl-1-phosphate phosphatase activity [GO:0043716];acireductone synthase activity [GO:0043874];magnesium ion binding [GO:0000287];methylthioribulose 1-phosphate dehydratase activity [GO:0046570];zinc ion binding [GO:0008270]	+	39	39	39	66.5	66.5	66.5	58.46	0	323.31	36082000000	552	1201100000	1166400000	1087900000	1170000000	1993400000	1440600000	1154100000	1289100000	1828700000	1657800000	2237300000	1667800000	972610000	1008600000	1191200000	1157100000	2057100000	1080700000	1869300000
1.54581	1.22554	0.575319	0.654812	0.416478	-0.353715	-0.339695	1.42616	-2.05742	-1.01441	-1.48276	0.140112	0.209833	-0.369143	-0.480689	-0.0962397			catalytic activity [GO:0003824]	+	28	28	28	58.6	58.6	58.6	52.147	0	296.3	24455000000	293	36396000	35508000	31141000	42652000	65915000	36846000	45597000	21752000	1779100000	1501700000	1811200000	1853500000	1105700000	1303700000	1275400000	1627200000	1263800000	912030000	1263200000
1.54706	1.81078	-0.902999	2.24447	-0.494509	-0.604365	0.230553	-0.382651	-0.0675589	-0.684946	0.276896	-0.120076	-0.802067	-0.516262	-0.849433	-0.684889		nucleus [GO:0005634]		+	3	3	3	2	2	2	154.27	1	-2	899850000	5	86875000	110200000	72242000	105910000	0	158870000	141220000	145670000	10318000	17424000	0	51121000	0	0	0	0	0	0	0
1.35391	1.39029	1.57258	1.54503	-0.616453	-0.560482	0.119143	-0.967153	-0.9154	0.600072	-1.18488	0.241041	-0.404715	-1.13391	-0.318677	-0.720396			FAD binding [GO:0071949];oxidoreductase activity [GO:0016491]	+	12	9	8	17.9	13.6	11.5	65.278	0	11.105	1141600000	26	51938000	51879000	27297000	18866000	145370000	231720000	184040000	202430000	29394000	40049000	51306000	98066000	0	0	0	0	0	6338900	0
-1.45414	-2.35822	-0.877901	-0.880495	0.33823	0.473258	0.563949	0.523631	0.297226	0.928926	0.463153	0.628774	-1.01019	0.724249	1.2656	0.37395				+	2	2	2	7.9	7.9	7.9	26.32	1	-2	188710000	5	0	0	0	0	0	0	0	0	0	0	0	0	3133900	4059700	4551100	56066000	4778400	5164400	4853100
-1.30112	-1.12808	-0.989855	-1.4637	0.927764	0.00441056	-0.212972	-0.490014	1.44592	1.26786	1.68719	0.984913	-0.22138	-0.0344447	-0.0290788	-0.447414	pentose-phosphate shunt, non-oxidative branch [GO:0009052]		ribose-5-phosphate isomerase activity [GO:0004751];transferase activity [GO:0016740]	+	4	4	4	16.9	16.9	16.9	35.682	0	25.575	765910000	26	0	0	0	0	0	0	0	0	39972000	35011000	27807000	41764000	43102000	41927000	43709000	42771000	69146000	49714000	75613000
-0.406399	-0.116368	0.544622	0.337813	0.182528	0.551846	0.76268	-0.243673	-0.815993	-2.40536	-1.47724	-0.646673	1.33517	1.46302	0.567838	0.366185	chloroplast accumulation movement [GO:0009904];microtubule-based movement [GO:0007018]		ATP binding [GO:0005524];microtubule binding [GO:0008017];microtubule motor activity [GO:0003777]	+	35	20	20	25.4	17.7	17.7	141.59	0	42.543	3550000000	87	205630000	244990000	170490000	152270000	246730000	191600000	190890000	265900000	107240000	88735000	134700000	86756000	280250000	130600000	134090000	139480000	57663000	48133000	61160000
-0.148061	0.10069	-0.282555	-0.37371	-0.285847	1.64948	1.22365	0.727606	-0.015185	-2.59181	-0.410266	-1.28953	-0.233464	0.704489	0.425435	0.799077		anaphase-promoting complex [GO:0005680];integral component of membrane [GO:0016021]	ligase activity [GO:0016874]	+	8	8	8	5.9	5.9	5.9	186.34	0	5.7995	4852900000	33	86728000	124650000	93190000	114530000	141500000	83481000	113270000	127760000	278460000	282110000	482070000	222010000	99997000	312350000	224350000	284830000	247260000	82620000	253740000
0.280273	0.188777	0.588275	0.961697	-1.07504	1.36203	-0.980266	-1.89184	0.859854	-1.12494	-1.10334	-0.75589	1.04459	0.24563	0.96349	0.436698				+	23	23	23	20.8	20.8	20.8	114.18	0	34.147	3347300000	69	118300000	167960000	157230000	156510000	390510000	433030000	564420000	349550000	18756000	144870000	53389000	50399000	90252000	123300000	19759000	11409000	41644000	92914000	19500000
-1.38155	-0.311001	-1.82985	-1.94826	0.130355	-0.00980863	-0.0110279	-0.621731	0.974907	1.28382	1.05208	0.570934	0.946648	0.602684	0.318748	0.233057			nucleic acid binding [GO:0003676]	+	4	4	4	8	8	8	71.324	0	4.3746	522040000	5	5347400	0	0	3233800	46226000	17033000	33553000	31799000	17360000	21126000	16382000	14500000	18406000	20408000	21130000	18135000	31726000	24697000	32747000
-0.927393	-0.126197	-1.09428	0.292713	-2.43506	-0.399842	-0.199957	-0.282141	0.451391	0.331666	0.736261	0.721054	-0.177488	0.909487	0.105402	2.09437			transferase activity [GO:0016740]	+	9	9	9	15.3	15.3	15.3	74.463	0	7.5419	1495400000	13	108000000	63810000	56965000	82880000	53284000	114710000	88833000	95671000	20789000	30405000	39795000	41479000	2933700	32037000	54080000	51987000	66476000	47376000	73847000
-0.94636	-1.49713	-0.907023	-0.632284	0.611128	2.55228	0.624792	1.09948	-0.865006	-0.138843	-0.69573	-0.510247	0.124533	0.708465	0.316602	0.155351		chloroplast [GO:0009507]	isomerase activity [GO:0016853]	+	13	13	13	34.6	34.6	34.6	30.383	0	23.986	5369400000	82	5830900	12092000	0	0	11041000	17157000	9264100	0	136500000	86253000	112900000	367550000	285160000	597860000	466220000	523850000	402940000	146070000	332260000
-0.806693	-0.826556	-1.11745	-1.24668	0.93055	1.59409	1.2723	1.86464	0.192721	-0.344247	0.186835	0.67698	-0.165234	-0.691583	-0.599625	-0.920052			ATP binding [GO:0005524]	+	102	10	10	81.6	14.1	14.1	74.374	0	323.31	26584000000	289	1500600000	1658300000	1355100000	1288600000	2212400000	2654600000	2292100000	2447500000	635700000	672570000	660070000	522560000	640100000	868000000	785250000	857450000	719190000	466930000	786200000
-0.809062	-0.688212	-0.422872	-0.509334	0.94507	0.93572	0.917042	0.881933	0.0377053	-1.40968	0.593318	-0.822781	1.57153	-1.79665	1.05126	-0.474988			hydrolase activity [GO:0016787]	+	2	1	1	7	4.1	4.1	35.974	1	-2	93404000	1	0	0	0	0	0	0	0	0	0	0	0	0	0	14386000	14436000	13759000	0	0	0
-0.878734	-0.44773	-0.362118	-1.13152	0.492403	0.133255	-0.182352	0.615063	-1.25498	-1.07336	-1.14971	-0.325966	1.46277	1.24074	1.51359	1.34865				+	42	42	42	72.8	72.8	72.8	46.913	0	323.31	214960000000	765	55870000	51216000	76166000	47294000	31704000	33137000	29112000	29390000	12635000000	12667000000	14226000000	11866000000	9877500000	11072000000	13858000000	12736000000	11454000000	7544200000	11172000000
0.51018	0.872873	0.967158	0.928074	-1.08541	-0.837307	-0.443619	-0.660199	-0.543888	-1.4768	-0.949112	-1.28461	0.90357	0.442996	1.10291	1.55318	carbohydrate metabolic process [GO:0005975]		intramolecular transferase activity, phosphotransferases [GO:0016868]	+	44	44	44	74	74	74	58.309	0	323.31	58738000000	605	1503400000	1872900000	1579300000	1481000000	1747700000	1840800000	1766400000	2016800000	3423100000	3063100000	3462500000	3147600000	1641800000	2148900000	2489900000	2619800000	2692600000	1814700000	2739000000
0.534906	0.587525	-1.63267	0.53661	-0.024061	0.725428	0.49835	0.871802	0.531048	-2.09292	-1.04724	-1.69538	0.686785	0.449175	0.534325	0.536315	signal transduction [GO:0007165]		ADP binding [GO:0043531]	+	12	12	12	17.7	17.7	17.7	82.505	0	10.69	1254100000	32	108380000	114380000	83007000	57613000	100490000	141040000	96416000	121670000	29785000	29215000	0	37380000	31482000	41989000	23849000	53365000	46875000	0	0
-0.46038	-0.431866	0.108009	-0.0212264	1.20649	1.14366	1.27414	1.28047	0.887724	-0.635538	-1.39071	1.08422	-1.35306	-0.951918	-0.942339	-0.79768	microtubule-based movement [GO:0007018]	microtubule [GO:0005874]	ATP binding [GO:0005524];microtubule binding [GO:0008017];microtubule motor activity [GO:0003777]	+	4	4	2	5.3	5.3	2.4	82.279	0.006758	1.6032	506420000	6	14332000	48779000	65262000	6101200	59282000	58716000	50847000	76713000	0	0	0	0	28847000	17511000	24758000	25422000	11345000	0	0
-1.41176	0.0786879	-1.28353	0.566055	0.728705	-0.339261	-0.783904	-0.513611	-0.557798	-0.447292	-0.168478	-0.856735	1.35623	0.967849	0.355657	2.30918				+	3	3	3	13.8	13.8	13.8	28.288	0	3.2153	1034300000	8	25775000	11278000	0	0	22335000	17184000	9389700	0	33454000	66549000	76294000	64830000	10416000	42700000	44751000	51312000	52663000	9031300	66397000
-1.97148	-0.601811	-0.409643	-0.165371	-2.26111	-0.272561	0.125073	-0.353674	0.903269	0.989932	0.988663	1.22479	0.141213	0.552842	0.473073	0.636799			electron transfer activity [GO:0009055]	+	4	4	4	13	13	13	37.58	0	3.5323	363740000	11	0	0	0	0	0	0	0	0	0	6736600	9648800	11445000	0	8530000	21682000	6955200	46158000	19814000	57509000
-0.0906681	0.81464	0.421907	0.0632763	-1.03018	-0.753762	0.643918	0.0180396	-0.806597	-1.41681	-1.3139	-1.15435	1.72497	1.14505	0.322217	1.41226		mitochondrial matrix [GO:0005759]	electron transfer activity [GO:0009055]	+	13	13	13	58.2	58.2	58.2	31.015	0	88.754	4089100000	112	172170000	150850000	123720000	135710000	120690000	173780000	227020000	172420000	157340000	140100000	203280000	148570000	93961000	146230000	171490000	188710000	202260000	95403000	181310000
1.16849	0.316956	0.377143	0.0887169	1.30426	0.142314	1.47823	-0.0313401	-0.758765	-2.43858	-0.472136	-1.03972	0.673145	-0.0446249	0.289963	-1.05406	glycine catabolic process [GO:0006546]	mitochondrion [GO:0005739]	aminomethyltransferase activity [GO:0004047];transaminase activity [GO:0008483]	+	70	70	70	87.7	87.7	87.7	46.352	0	323.31	1615300000000	2772	4359500000	5934700000	4482800000	4325200000	6722200000	6870800000	6052000000	6569700000	106870000000	103800000000	110520000000	102350000000	87634000000	89234000000	97733000000	90023000000	94176000000	68750000000	100120000000
-0.130808	-0.54772	-0.0731997	0.0940643	1.07148	1.45193	1.59889	1.81891	-0.960062	-1.54569	-0.489219	0.124873	-0.82078	-0.95531	-0.628865	-0.00848406	ATP synthesis coupled proton transport [GO:0015986]	mitochondrion [GO:0005739];proton-transporting ATP synthase complex, catalytic core F(1) [GO:0045261]	ATP binding [GO:0005524];proton-transporting ATP synthase activity, rotational mechanism [GO:0046933]	+	45	45	44	65.9	65.9	64.5	55.103	0	323.31	138220000000	790	5656400000	5328700000	5433700000	4704200000	15557000000	15461000000	14551000000	14897000000	3168200000	2961800000	4040400000	3639200000	3205300000	3693200000	4253700000	3886700000	3270300000	2170800000	3543500000
0.371262	0.164901	-1.03043	-0.862758	-1.46621	-0.554676	-0.310942	0.127018	0.319967	-1.6751	-0.110764	-0.351916	1.46319	1.13588	1.63238	1.14819		cell wall [GO:0005618];vacuole [GO:0005773]		+	6	6	6	44	44	44	25.255	0	276.22	8110300000	135	25900000	14078000	25244000	30317000	42356000	37865000	70999000	48528000	558160000	528640000	503690000	446110000	277030000	400360000	415820000	424830000	569040000	258590000	463460000
-0.125989	0.150689	-0.0740432	0.129591	-0.827594	0.087233	0.0125736	-0.0130773	-0.805459	-2.43908	-0.679891	-0.607273	1.10403	1.2304	1.40815	1.44974	D-ribose catabolic process [GO:0019303];nucleoside metabolic process [GO:0009116]	chloroplast [GO:0009507];chloroplast nucleoid [GO:0042644];chloroplast stroma [GO:0009570];nucleus [GO:0005634];plastid nucleoid [GO:0042646]	ATP binding [GO:0005524];metal ion binding [GO:0046872];ribokinase activity [GO:0004747]	+	23	23	23	55.4	55.4	55.4	40.189	0	308	27640000000	304	459380000	497760000	445460000	374150000	565820000	639030000	550740000	562310000	1395100000	1519300000	1677500000	1522600000	1078200000	1147700000	1259100000	1335200000	1628300000	773660000	1587300000
-1.04955	0.596721	-1.48502	-0.817159	-1.16358	-1.39354	0.454226	-1.41727	0.590754	0.899656	0.692584	0.893188	0.553032	0.663277	0.916025	1.06666		nucleus [GO:0005634]	AT DNA binding [GO:0003680]	+	3	3	3	13.9	13.9	13.9	43.445	0	13.122	234330000	6	0	0	0	0	26265000	19246000	22437000	11882000	2705000	0	1728100	3455500	0	0	0	0	22698000	12441000	24263000
-1.2543	-0.86165	-1.14804	0.646795	0.0528545	0.612309	-0.118803	0.0208983	-0.074057	-1.82645	-0.774987	-0.28194	1.44767	1.38511	1.36612	0.808474	cellular response to oxidative stress [GO:0034599];response to high light intensity [GO:0009644]	cytoplasm [GO:0005737];cytosol [GO:0005829];plastid [GO:0009536]	AU-rich element binding [GO:0017091];NADPH:quinone reductase activity [GO:0003960]	+	32	32	32	61.8	61.8	61.8	44.022	0	318.16	56926000000	453	3351000000	1553800000	2288100000	3065800000	3844600000	3942300000	3074700000	3260800000	2117000000	1683200000	1949600000	2136100000	1252400000	1700800000	1900900000	1913100000	2061400000	1450700000	2136400000
-1.04306	-0.611741	-0.289078	-0.0799302	0.760964	0.36027	-0.00196359	-0.757504	-1.10058	-0.00718366	-1.51431	-0.73438	0.591172	1.07398	0.970975	2.38237	heat acclimation [GO:0010286];negative regulation of gene silencing [GO:0060969];regulation of cellular response to heat [GO:1900034];regulation of mitotic chromosome decondensation [GO:1901651];response to heat [GO:0009408]	chromocenter [GO:0010369];nucleolus [GO:0005730]		+	22	22	22	38.7	38.7	38.7	50.516	0	96.737	6368100000	151	220160000	259970000	221210000	144500000	428640000	479390000	344830000	397890000	281840000	244360000	252330000	246430000	170120000	192480000	179280000	237300000	199620000	119610000	182300000
0.16825	-0.385617	0.776301	1.44473	0.676666	0.495951	0.434624	0.24501	-1.42584	-1.54371	-1.20455	-1.66966	0.51211	1.4372	0.333129	-0.294589				+	16	16	16	48.4	48.4	48.4	38.478	0	102.01	8834900000	191	354100000	458890000	343370000	297510000	358630000	339460000	309240000	310460000	345670000	345360000	569780000	446050000	322910000	317390000	378900000	273990000	289930000	146390000	297110000
-0.230903	-1.01571	-0.962905	-0.076502	-0.000967802	0.74586	1.29491	0.802253	-0.410309	-1.47877	-0.454862	-1.94367	0.787404	1.39412	0.790666	0.75939	one-carbon metabolic process [GO:0006730];photorespiration [GO:0009853];tetrahydrofolate interconversion [GO:0035999]	cytosol [GO:0005829];mitochondrion [GO:0005739]	methenyltetrahydrofolate cyclohydrolase activity [GO:0004477];methylenetetrahydrofolate dehydrogenase (NADP+) activity [GO:0004488]	+	9	9	9	31.5	31.5	31.5	38.048	0	11.112	2186200000	58	70346000	82983000	102450000	101540000	142440000	169970000	133920000	140200000	58955000	19649000	35222000	112690000	29321000	43939000	127350000	38607000	33634000	14110000	51634000
-1.6686	-1.21005	-2.19643	-1.07325	0.540549	0.74445	0.410484	0.68916	0.573455	0.897151	0.784552	1.16914	-0.178313	0.230565	0.290565	-0.00343112				+	4	4	4	17.3	17.3	17.3	36.627	0	33.963	490580000	10	0	0	0	0	0	0	0	0	0	0	0	0	39260000	32496000	31805000	45312000	47125000	59595000	54789000
-1.13638	-1.9932	-1.07141	-1.83872	0.957358	0.707989	0.990643	0.807423	0.935299	0.239333	0.350681	0.274899	-0.0419123	0.968021	0.118888	-0.268905	histone H3-R17 methylation [GO:0034971];histone H3-R2 methylation [GO:0034970];histone H3-R26 methylation [GO:0034972];peptidyl-arginine methylation, to asymmetrical-dimethyl arginine [GO:0019919];regulation of flower development [GO:0009909];vegetative to reproductive phase transition of meristem [GO:0010228]	chloroplast [GO:0009507];cytoplasm [GO:0005737];nucleus [GO:0005634]	[myelin basic protein]-arginine N-methyltransferase activity [GO:0016277];histone-arginine N-methyltransferase activity [GO:0008469];protein heterodimerization activity [GO:0046982];protein homodimerization activity [GO:0042803];protein-arginine omega-N asymmetric methyltransferase activity [GO:0035242];protein-arginine omega-N monomethyltransferase activity [GO:0035241]	+	25	21	21	54.5	46.4	46.4	58.856	0	65.746	8538800000	153	714340000	826690000	583110000	551300000	769770000	938240000	723410000	847310000	156900000	93368000	171100000	106510000	166800000	185590000	113360000	174760000	249110000	150560000	213660000
0.934492	0.726861	0.408135	0.360565	0.709803	0.737599	0.281952	0.660114	0.328985	-2.12432	-2.26269	-0.0676875	0.435645	0.419315	-1.23722	-0.311551	phosphatidylethanolamine biosynthetic process [GO:0006646];protein autoprocessing [GO:0016540]	cytosol [GO:0005829];endoplasmic reticulum [GO:0005783];endoplasmic reticulum membrane [GO:0005789]	calcium ion binding [GO:0005509];phosphatidylserine decarboxylase activity [GO:0004609]	+	9	9	9	18.9	18.9	18.9	70.352	0	4.3225	1800500000	21	134170000	119260000	54399000	79099000	126690000	805190000	103610000	143580000	31701000	24532000	21464000	18112000	18660000	22091000	15231000	0	17492000	0	0
-0.0436343	-2.12092	0.159677	-2.74757	0.115865	0.321976	0.279883	0.110667	0.58995	0.403308	0.384221	0.220043	0.224796	0.19275	0.729871	1.17912	proteolysis [GO:0006508]	vacuole [GO:0005773]	carboxypeptidase activity [GO:0004180];dipeptidyl-peptidase activity [GO:0008239];serine-type peptidase activity [GO:0008236]	+	21	4	4	38.2	13.9	13.9	54.21	0	22.423	6579900000	14	0	14549000	0	0	0	0	0	0	11495000	0	16814000	0	31446000	18307000	19363000	12251000	34777000	18038000	51145000
-1.73115	-1.23072	-0.723927	-0.962064	1.75755	0.869978	0.254284	0.283332	-1.46522	0.868148	-0.648425	0.179388	0.422797	0.635477	0.771271	0.719294	carbohydrate metabolic process [GO:0005975]	cytosol [GO:0005829];secretory vesicle [GO:0099503];vacuole [GO:0005773]	beta-N-acetylhexosaminidase activity [GO:0004563];hexosaminidase activity [GO:0015929];N-acetyl-beta-D-galactosaminidase activity [GO:0102148]	+	31	31	30	54.7	54.7	54.7	61.229	0	292.57	54172000000	386	1428900000	1511300000	1318500000	1199000000	1367000000	1072800000	1373500000	1097900000	2311700000	2078800000	2581800000	2437000000	2800700000	2847900000	2503000000	2597000000	1915500000	2387400000	2398200000
1.56282	1.54997	1.32876	1.50303	-1.23663	-0.798347	-0.586678	-0.652933	-0.0478723	-0.474376	0.390148	0.382024	-0.160367	-1.18072	-0.76008	-0.818746			hydrolase activity [GO:0016787]	+	12	12	12	30.9	30.9	30.9	47.636	0	31.139	2594200000	79	276490000	250330000	206950000	257000000	284400000	248690000	248180000	284130000	131330000	129330000	139380000	104650000	0	1390900	0	0	6494700	0	14118000
1.16815	1.3295	1.27925	0.985695	-1.68222	-0.571945	-0.019675	-1.12741	0.370112	-1.70411	0.540786	0.638593	-0.236546	0.358261	-0.555984	-0.772464		integral component of membrane [GO:0016021];nucleus [GO:0005634];plasma membrane [GO:0005886]	ATP binding [GO:0005524];protein kinase activity [GO:0004672]	+	8	7	7	11.4	10.1	10.1	78.171	0	8.4883	2023800000	39	30582000	41098000	0	10586000	27969000	59916000	188320000	231790000	173520000	108240000	172440000	155330000	11349000	50117000	54489000	41263000	149590000	18019000	91460000
0.861984	1.18621	-1.25536	0.497771	1.25634	-0.662017	1.04118	1.19846	0.649233	-0.450426	-0.213078	0.175842	-0.993097	-0.360059	-1.89741	-1.03557	cellular amino acid metabolic process [GO:0006520];response to water deprivation [GO:0009414];response to wounding [GO:0009611];tyramine biosynthetic process [GO:1901695]	cytoplasm [GO:0005737]	aromatic-L-amino-acid decarboxylase activity [GO:0004058];pyridoxal phosphate binding [GO:0030170];tyrosine decarboxylase activity [GO:0004837]	+	3	2	2	4.4	3.3	3.3	61.031	1	-2	320720000	9	0	0	0	0	0	0	0	0	29083000	36005000	0	27269000	39063000	7836800	33663000	39177000	36657000	8378900	15202000
0.347162	0.924135	0.519404	0.731438	-0.961544	-0.330837	-0.994889	-1.0195	0.426174	1.54722	0.254992	2.03351	-1.2716	-0.447609	-0.781377	-0.976684		nascent polypeptide-associated complex [GO:0005854]		+	11	8	8	38.9	34.6	34.6	23.114	0	139.01	7359900000	81	561340000	522230000	420960000	456790000	916670000	875840000	775060000	972550000	127560000	159000000	123170000	136940000	46800000	61226000	87491000	39603000	167780000	139610000	178370000
1.71246	1.51494	1.64918	1.58173	-0.890382	-0.78425	-0.933443	-0.815648	-0.0831591	-0.322346	-0.111598	-0.10258	-0.614745	-0.615262	-0.67648	-0.50841			methylmalonate-semialdehyde dehydrogenase (acylating) activity [GO:0004491]	+	39	39	39	59.8	59.8	59.8	53.406	0	323.31	72820000000	602	3001300000	3220100000	2548600000	2396900000	3396500000	3855800000	3512100000	3512100000	5360400000	4964500000	5527800000	5243000000	1486400000	1637200000	1741700000	1729900000	2782500000	1843200000	2694200000
0.561478	1.24078	0.331382	0.789426	0.344495	-1.2005	0.809356	1.93686	-1.3048	-0.219973	-1.30804	-1.15747	-1.19828	0.308965	-0.202132	0.268437				+	6	6	6	29.9	29.9	29.9	17.688	0	48.615	1841500000	42	21734000	23266000	33785000	30768000	81304000	87350000	81342000	74332000	99055000	69550000	102400000	121030000	92703000	55933000	108150000	144580000	58961000	54311000	59597000
1.01119	1.51669	1.68871	1.19298	-0.973626	0.681153	0.109644	0.209274	0.159463	-1.80882	-1.04143	-0.536994	-0.706799	-0.411943	-0.572329	-0.51717			translation initiation factor activity [GO:0003743]	+	39	39	39	24.2	24.2	24.2	187.55	0	244.99	9720700000	203	691880000	813380000	524100000	596830000	1217500000	1340000000	1161600000	1299700000	195470000	170860000	193080000	128830000	109210000	154660000	125450000	117770000	98342000	52344000	86635000
-1.04619	0.317771	-0.969657	-0.705404	0.132058	0.195728	0.449307	0.0871817	-0.769299	-1.54645	-1.32969	-0.200023	1.31239	1.24277	1.27314	1.55638	nucleosome assembly [GO:0006334]	nucleus [GO:0005634]		+	37	37	30	60.1	60.1	56.6	42.974	0	323.31	23124000000	236	2329200000	2643400000	2177100000	2440300000	2884100000	3015700000	3082700000	3246200000	16492000	23848000	24981000	16826000	51922000	64923000	77776000	56154000	26923000	21830000	13498000
-0.245172	-1.29219	-0.71723	0.0880559	-0.174394	-0.90228	-2.04499	-1.09147	0.88177	1.06825	0.964843	1.6524	0.442185	0.683102	0.504672	0.182445	carbon dioxide transport [GO:0015670];response to salt stress [GO:0009651];response to water deprivation [GO:0009414];water transport [GO:0006833]	anchored component of plasma membrane [GO:0046658];cytosol [GO:0005829];integral component of membrane [GO:0016021];plasma membrane [GO:0005886];vacuole [GO:0005773]	water channel activity [GO:0015250]	+	6	6	2	30.6	30.6	9.3	32.454	0	49.27	4103200000	36	387410000	496410000	411570000	405590000	505980000	604730000	557910000	584490000	0	0	0	0	6946800	0	0	0	22621000	9284400	27630000
-1.04513	-0.591036	-0.998519	-1.06169	-1.48141	-0.344779	1.10004	0.430179	-0.442893	-0.429034	-0.0822821	1.13136	0.817049	-0.0978315	1.00535	2.09063	cellular glucose homeostasis [GO:0001678];glycolytic process [GO:0006096]		ATP binding [GO:0005524];glucose binding [GO:0005536];hexokinase activity [GO:0004396]	+	6	2	2	20.4	11.2	11.2	42.926	0	4.0839	236860000	21	8720200	8962000	0	35416000	6778000	41413000	6329200	4714400	5389800	5760200	5831500	5213000	3423700	5590800	9573500	7669500	6445600	4953000	7387700
-1.82389	-1.56343	-0.276547	0.761072	1.66825	1.22206	0.941524	-0.0433288	0.538684	-0.181771	-1.08127	-1.10486	0.0377287	0.473446	0.650017	-0.21768	glucosinolate biosynthetic process [GO:0019761]		8-methylthiopropyl glucosinolate S-oxygenase activity [GO:0080107];flavin adenine dinucleotide binding [GO:0050660];N,N-dimethylaniline monooxygenase activity [GO:0004499];NADP binding [GO:0050661]	+	32	32	30	62.3	62.3	61	52.103	0	159.83	16242000000	223	2021600000	2413200000	1767300000	1861400000	1383300000	1490900000	1693200000	1683300000	120500000	85438000	151530000	138500000	150140000	139260000	135620000	87991000	128790000	76219000	111550000
-0.698037	-1.13709	-1.31232	-1.42767	0.349619	0.693625	1.13357	-0.96526	0.950953	0.88496	0.881257	0.781473	0.264483	0.756682	-1.63961	0.483368				+	2	2	2	7.2	7.2	7.2	28.229	0.0013052	2.3186	156630000	9	0	0	0	0	0	0	0	0	0	0	0	0	3318300	11005000	16712000	0	24484000	17502000	22907000
1.19563	1.03009	1.26215	1.7698	-0.813148	-0.513708	-0.621372	-0.900469	0.325373	0.385438	0.526291	0.628693	-0.909407	-0.885901	-1.082	-1.39746	acetyl-CoA biosynthetic process from pyruvate [GO:0006086];cell redox homeostasis [GO:0045454];oxidation-reduction process [GO:0055114];response to arsenic-containing substance [GO:0046685]	chloroplast envelope [GO:0009941];chloroplast stroma [GO:0009570];cytosol [GO:0005829];nucleolus [GO:0005730]	dihydrolipoyl dehydrogenase activity [GO:0004148];flavin adenine dinucleotide binding [GO:0050660]	+	44	22	22	62.4	36	36	66.66	0	323.31	22833000000	272	2194500000	2093800000	1794400000	1800200000	2579100000	2702600000	2449700000	2608200000	513100000	477590000	532780000	466980000	128920000	204480000	196030000	129200000	270020000	210280000	386650000
0.144115	0.0252465	1.02923	-0.599126	-0.186899	-0.430425	-0.211127	-0.266661	1.03087	1.93865	0.798197	1.16805	-1.06338	-1.25	-0.212731	-1.91401	endoplasmic reticulum to Golgi vesicle-mediated transport [GO:0006888];Golgi vesicle docking [GO:0048211];intracellular protein transport [GO:0006886];membrane fusion [GO:0061025];post-embryonic development [GO:0009791];protein exit from endoplasmic reticulum [GO:0032527];transcytosis [GO:0045056];vesicle fusion with Golgi apparatus [GO:0048280]	cytosol [GO:0005829];endoplasmic reticulum [GO:0005783];ER to Golgi transport vesicle membrane [GO:0012507];Golgi apparatus [GO:0005794];Golgi membrane [GO:0000139];Golgi stack [GO:0005795]		+	35	35	35	46.5	46.5	46.5	101.83	0	319.31	7052600000	166	701520000	584910000	473570000	512390000	843450000	839290000	838140000	941290000	87056000	72056000	135360000	74548000	172390000	50530000	115460000	39468000	92046000	82855000	107410000
-1.37978	-1.30269	0.268468	-0.613098	-0.251444	0.555643	0.802057	0.897835	-0.774306	-1.41398	0.517488	-1.36987	0.722139	0.883085	1.05133	1.40713	fumarate metabolic process [GO:0006106];tricarboxylic acid cycle [GO:0006099]	tricarboxylic acid cycle enzyme complex [GO:0045239]	fumarate hydratase activity [GO:0004333]	+	22	1	1	69.4	3.5	3.5	33.728	0.0029406	2.0677	353740000	10	0	0	0	0	0	0	0	0	0	0	16291000	0	0	22760000	32326000	31194000	0	0	21191000
-1.31202	0.988713	-0.679928	-0.582027	1.91399	1.28997	0.704262	0.985032	-1.09678	0.80723	-0.702692	-0.524915	-0.817761	-1.06814	-0.318739	0.413811				+	12	12	12	57.5	57.5	57.5	23.99	0	131.46	11730000000	136	0	0	0	0	0	0	0	0	690110000	856660000	834240000	708430000	672160000	742520000	695920000	739300000	721530000	565580000	730260000
-1.51641	-1.66927	-1.50861	-1.77384	0.734367	0.395919	0.258458	0.508153	0.644823	1.07298	0.721583	0.960387	0.458164	0.312457	0.0100109	0.390846			translation initiation factor activity [GO:0003743]	+	26	26	26	49.8	49.8	49.8	53.578	0	150.49	17743000000	259	533990000	612720000	412960000	436530000	677730000	824560000	595730000	691460000	647940000	498750000	700390000	642940000	714580000	700880000	764660000	882000000	936890000	651540000	1013500000
-1.26964	-1.58263	-1.42038	-1.85371	-0.336352	0.202261	0.559581	0.222608	1.18748	0.56897	1.09415	1.11744	0.699935	0.395864	0.225747	0.188669	branched-chain amino acid biosynthetic process [GO:0009082]		L-isoleucine transaminase activity [GO:0052656];L-leucine transaminase activity [GO:0052654];L-valine transaminase activity [GO:0052655]	+	33	33	22	56.7	56.7	42.3	44.731	0	323.31	96054000000	550	1891000000	2246700000	1913500000	1754200000	3040200000	3596500000	3274500000	3229800000	3925900000	2482300000	3732300000	3532700000	3728300000	4542100000	4739500000	4519500000	5638200000	3986900000	6019100000
-0.578948	-0.132753	-0.200907	-0.159045	-0.339713	-0.498958	-0.412091	-0.542452	-0.880348	-1.54896	-0.732092	-0.281952	1.50588	1.55471	1.67396	1.57366	nucleosome assembly [GO:0006334]	nucleus [GO:0005634]		+	31	26	21	59.9	54.3	48.2	41.607	0	303.56	14098000000	176	1435300000	1555400000	1282300000	1122800000	2017100000	1702600000	2175100000	2164900000	18010000	39704000	34986000	29593000	22193000	17326000	23135000	17413000	23959000	5387800	14175000
0.069633	0.561921	0.574297	-0.191637	-1.09058	-0.938003	-1.41923	-2.00431	0.47766	-0.907111	0.653606	0.703503	0.546524	0.634147	0.522614	1.80696	methylation [GO:0032259]		methyltransferase activity [GO:0008168]	+	2	2	2	8.1	8.1	8.1	37.82	0.0098436	1.4725	160340000	2	0	0	0	0	10458000	0	0	0	6317800	0	16443000	0	0	0	0	0	12621000	0	17427000
1.08632	-0.930114	0.607304	0.801558	0.536202	0.534242	0.417882	0.31355	0.536854	0.770131	0.553282	0.572363	-2.36901	-0.991483	-1.13968	-1.2994		integral component of membrane [GO:0016021]		+	7	7	7	11.8	11.8	11.8	72.747	0	4.5756	683220000	13	58166000	54667000	44796000	56773000	84832000	108490000	43154000	56876000	11370000	0	17010000	22543000	20031000	6032000	4818800	3861800	7238000	30377000	19677000
-0.0479713	1.28018	0.127492	0.990801	1.25856	1.37803	-0.00184303	1.09147	-0.672649	-1.28021	-0.541746	-0.382678	-1.00301	-0.917147	0.476132	-1.7554	developmental process [GO:0032502];regulation of circadian rhythm [GO:0042752];response to abscisic acid [GO:0009737];response to oxidative stress [GO:0006979];response to water deprivation [GO:0009414];starch metabolic process [GO:0005982]	nucleus [GO:0005634]		+	2	2	2	2	2	2	164.93	0	3.0579	291520000	9	16312000	21886000	31449000	15627000	63467000	37230000	37285000	38370000	4533800	6833300	5157200	0	0	0	0	5938200	3472300	0	0
-2.35175	-1.20014	-0.761136	-1.03543	0.854018	0.268847	0.585229	0.832981	0.222614	-0.0897942	-0.793965	0.250168	0.85868	-0.0220573	0.863127	1.5186	pectin catabolic process [GO:0045490]		metal ion binding [GO:0046872];pectate lyase activity [GO:0030570]	+	11	11	10	41.4	41.4	37.8	37.186	0	25.571	3185700000	63	71933000	67869000	82968000	41094000	88743000	163000000	96951000	68978000	106120000	115960000	162900000	159460000	111210000	121990000	165360000	117170000	159640000	55219000	154410000
0.0741246	0.508838	-0.262155	0.710275	-0.814362	0.136106	-0.842575	0.909797	0.689242	1.6975	0.759187	1.14284	-0.98161	-1.14834	-2.02986	-0.549015	cysteinyl-tRNA aminoacylation [GO:0006423];response to cadmium ion [GO:0046686]	cytoplasm [GO:0005737];cytosol [GO:0005829]	ATP binding [GO:0005524];cysteine-tRNA ligase activity [GO:0004817];metal ion binding [GO:0046872]	+	39	39	39	61.4	61.4	61.4	57.841	0	310.29	34156000000	407	1709500000	2176900000	1726800000	1621000000	2713500000	3232000000	2549300000	2857200000	670830000	1156200000	588350000	961980000	893940000	1098000000	882390000	1290900000	1097400000	875470000	1116000000
-1.21981	-1.43928	-1.00419	-0.786128	0.0283908	-0.44755	-0.121151	0.376289	1.87873	1.09143	1.62587	1.29292	-0.347528	-0.248113	-0.279325	-0.400553	embryo development ending in seed dormancy [GO:0009793];plastid transcription [GO:0042793]	chloroplast [GO:0009507];cytosol [GO:0005829]	GTP binding [GO:0005525]	+	17	17	17	21.1	21.1	21.1	73.125	0	32.714	4728200000	102	0	3108100	4712100	0	0	15506000	5020100	6583500	181680000	133860000	207060000	196770000	189880000	216910000	267680000	237190000	554440000	410910000	538990000
1.57134	1.60412	1.64105	1.50142	-0.606079	-0.951488	-0.267435	-0.453042	-0.6642	-0.830431	-0.580681	-0.865763	0.50277	-0.522444	-0.799785	-0.279357	gluconeogenesis [GO:0006094]		ATP binding [GO:0005524];kinase activity [GO:0016301];phosphoenolpyruvate carboxykinase (ATP) activity [GO:0004612]	+	24	16	16	45.1	33	33	72.891	0	69.167	2215000000	46	101060000	36482000	31749000	74650000	152030000	129180000	157220000	192790000	257030000	318690000	439010000	325080000	0	0	0	0	0	0	0
-1.07756	-0.588791	-1.21789	-1.20411	0.904465	0.83808	0.878973	0.944873	-0.832482	-0.794889	-1.00372	-0.921779	1.08608	0.858615	1.01163	1.1185				+	9	9	9	61.7	61.7	61.7	21.768	0	52.442	2738800000	67	13311000	0	0	0	0	8945000	7568500	0	86150000	136480000	94432000	67258000	162230000	200740000	220060000	238260000	126090000	73482000	104410000
-1.54378	-0.591403	-0.884537	0.0257117	0.272183	-0.792615	-0.495923	-1.36899	-0.370215	-0.330536	0.0714912	0.36328	1.13011	1.14673	1.60492	1.76357		cytosol [GO:0005829];plasma membrane [GO:0005886];vacuole [GO:0005773]	hydrolase activity, acting on carbon-nitrogen (but not peptide) bonds, in linear amides [GO:0016811]	+	31	31	21	68.6	68.6	52	49.668	0	323.31	28088000000	405	15100000	34529000	42158000	26540000	215590000	153520000	133380000	119660000	1562400000	1451300000	1480100000	1591000000	1221800000	1197500000	1434500000	1182900000	1733500000	1224600000	1773500000
-1.18719	-0.0197754	-1.00586	-1.12463	1.06686	0.341827	0.386337	1.39502	-0.855991	-0.0512464	-0.864836	-1.38927	0.71734	1.36814	1.45287	-0.229601	cell wall organization [GO:0071555]	extracellular region [GO:0005576];plant-type cell wall [GO:0009505]	carboxylic ester hydrolase activity [GO:0052689];pectin acetylesterase activity [GO:0052793]	+	7	7	7	29.3	29.3	29.3	50.038	0	54.698	1939800000	36	0	0	0	0	0	0	0	0	107910000	92512000	86682000	86503000	98535000	82907000	137270000	149170000	98814000	74634000	128670000
-0.278845	-0.203528	-0.485919	-0.0929255	-0.00934883	0.375919	0.56247	0.319845	-1.45354	-1.23154	-1.12112	-1.47859	1.76086	0.830618	1.44487	1.06076	cysteine biosynthetic process [GO:0019344];cysteine biosynthetic process from serine [GO:0006535];double fertilization forming a zygote and endosperm [GO:0009567];pollen tube development [GO:0048868];pollen tube growth [GO:0009860]	chloroplast [GO:0009507];chloroplast stroma [GO:0009570];cytosol [GO:0005829];mitochondrion [GO:0005739]	ATP binding [GO:0005524];cysteine synthase activity [GO:0004124];lyase activity [GO:0016829];zinc ion binding [GO:0008270]	+	41	37	37	73	66.1	66.1	46.115	0	323.31	35397000000	496	1879900000	1755800000	1482500000	1375300000	2283200000	2637700000	2307800000	2298600000	1254600000	949620000	1392800000	1153700000	930360000	982840000	1177000000	1216200000	1151900000	818500000	1256200000
-1.08373	-0.509473	-1.63033	-0.792845	-0.248588	0.395359	0.830289	1.13025	-1.27909	0.150567	-0.81104	-0.0959398	0.216209	0.401982	1.78155	1.54482			GTP binding [GO:0005525];hydrolase activity [GO:0016787]	+	2	2	2	5.8	5.8	5.8	52.45	0.0098522	1.4802	1299600000	16	8622700	0	4789000	7389400	0	10664000	0	7341300	60637000	64003000	56198000	63501000	52910000	79664000	82937000	101990000	55962000	63678000	63703000
0.407682	0.299677	0.48947	0.358352	-0.35222	-0.0118206	-0.505259	0.0505499	1.31646	1.04107	1.12776	1.40243	-1.31288	-1.52007	-1.32934	-1.46185	ribosomal small subunit assembly [GO:0000028];translation [GO:0006412]	cytosolic small ribosomal subunit [GO:0022627]	structural constituent of ribosome [GO:0003735]	+	24	24	18	60.9	60.9	48	31.981	0	323.31	176320000000	791	19179000000	17873000000	14411000000	15018000000	19129000000	20499000000	21637000000	23231000000	1903200000	1478700000	2314400000	1999300000	966240000	1288600000	956260000	1139600000	2518400000	1861400000	2517200000
-1.3997	-1.84093	-1.57535	-1.48177	0.60898	1.00623	0.798766	0.820987	0.558403	0.752372	0.987409	0.587789	0.00307886	0.248383	-0.127355	0.0527069			transferase activity, transferring acyl groups [GO:0016746]	+	9	9	9	35.4	35.4	35.4	29.2	0	22.653	2913600000	43	14851000	0	0	16798000	0	17185000	0	0	59004000	44752000	46777000	86122000	206670000	266290000	222920000	153860000	272050000	217920000	317220000
0.609715	0.294801	0.628659	0.450587	0.729605	0.613055	0.365785	1.1449	-1.54768	-1.6311	-2.09406	-1.19127	0.440234	0.233839	0.594402	0.358522	acetate metabolic process [GO:0006083];acetyl-CoA biosynthetic process from acetate [GO:0019427];fatty acid metabolic process [GO:0006631]	chloroplast [GO:0009507];chloroplast stroma [GO:0009570];cytosol [GO:0005829];glyoxysome [GO:0009514]	acetate-CoA ligase activity [GO:0003987];AMP binding [GO:0016208];ATP binding [GO:0005524]	+	59	59	59	64.9	64.9	64.9	81.888	0	323.31	150960000000	890	6296200000	7539800000	5082400000	5676800000	6722900000	7315800000	7565900000	6962300000	6982200000	6771400000	7447700000	6843400000	5339100000	5878500000	5919300000	5919700000	6143500000	4074500000	5650300000
0.0500791	0.103824	0.106429	-0.316839	0.82609	0.80609	0.904278	1.02335	-1.53295	-1.44393	-1.62357	-1.64916	0.67452	0.673252	0.722277	0.676263	microtubule-based process [GO:0007017]	cytoplasm [GO:0005737];microtubule [GO:0005874]	GTP binding [GO:0005525];GTPase activity [GO:0003924];structural constituent of cytoskeleton [GO:0005200]	+	53	53	4	99.6	99.6	14.9	49.54	0	323.31	544360000000	1476	57801000000	55018000000	47398000000	46133000000	65233000000	66947000000	52349000000	56753000000	6366900000	5697100000	6326200000	5225200000	6118500000	6676500000	7197400000	7683400000	3465500000	2412000000	3636900000
0.821821	-0.0835165	-0.136444	0.100639	0.205761	-0.500514	-0.334514	0.265992	-0.88514	-0.901053	-1.6448	-1.82184	1.54624	1.20468	1.1613	1.00141	methylglyoxal catabolic process to D-lactate via S-lactoyl-glutathione [GO:0019243];response to cadmium ion [GO:0046686]	chloroplast [GO:0009507];cytosol [GO:0005829];extracellular region [GO:0005576]	lactoylglutathione lyase activity [GO:0004462];metal ion binding [GO:0046872]	+	24	24	24	72.8	72.8	72.8	26.472	0	323.31	48558000000	417	1180200000	1219900000	1043400000	970770000	1383000000	1316400000	1236400000	1459200000	2770200000	2469000000	2783600000	2649200000	1925300000	1979300000	2107400000	2064300000	2376700000	1528800000	1528600000
0.59593	0.980579	-0.317692	0.226536	0.170349	0.343883	1.13629	-0.751039	-1.39429	-0.796121	-1.63887	-1.39859	0.00326366	1.31518	-0.0793991	1.60399	coenzyme A biosynthetic process [GO:0015937]	cytosol [GO:0005829];nucleus [GO:0005634]	pantothenate kinase activity [GO:0004594]	+	15	5	5	39.6	13	13	40.071	0	10.11	442170000	15	0	0	0	0	0	3945800	0	0	45206000	41910000	51324000	32053000	36140000	8940600	36089000	32200000	13327000	11340000	6222200
-1.14769	-1.1077	-0.271947	-1.16836	0.449922	1.13777	0.352254	0.676255	-0.366326	-0.497804	0.396755	-2.18977	1.13144	1.05736	0.836649	0.711185	endoplasmic reticulum membrane organization [GO:0090158];endoplasmic reticulum-plasma membrane tethering [GO:0061817];intracellular transport [GO:0046907];viral process [GO:0016032]	endoplasmic reticulum membrane [GO:0005789];extracellular region [GO:0005576];integral component of membrane [GO:0016021];plasma membrane [GO:0005886]		+	2	2	2	4.7	4.7	4.7	43.269	0.0048886	1.8544	278240000	16	11233000	0	0	9405900	0	0	0	0	11388000	10516000	15724000	11010000	12923000	27784000	14969000	16670000	13928000	9595600	17662000
-0.165285	-0.0821708	0.0823022	0.470785	0.620231	0.294589	0.670513	0.810589	-1.6436	-1.8716	-1.57632	-1.07506	0.540157	0.744138	0.876743	1.30399	microtubule-based process [GO:0007017]	cytoplasm [GO:0005737];microtubule [GO:0005874]	GTP binding [GO:0005525];GTPase activity [GO:0003924];structural constituent of cytoskeleton [GO:0005200]	+	45	16	14	74.9	41.8	33.3	49.654	0	323.31	98789000000	551	8378700000	9083000000	7290600000	6937900000	9784100000	9726800000	8176700000	8636600000	1680400000	1818900000	2063300000	2399100000	1659000000	1734800000	2116100000	2104800000	1048900000	607650000	1100400000
-0.811884	-0.0342709	-1.27565	-1.08443	-1.85106	-0.366761	0.965399	-0.246593	1.6675	-0.50948	1.34823	0.936246	0.224759	0.962894	-0.328315	0.40342		integral component of membrane [GO:0016021];plasma membrane [GO:0005886]	ATP binding [GO:0005524];protein serine/threonine kinase activity [GO:0004674]	+	9	9	7	7.6	7.6	5.8	105.62	0	15.894	2226900000	49	112320000	121060000	139780000	139620000	83373000	128160000	104080000	130830000	50571000	34871000	71936000	62105000	20557000	49036000	101260000	34632000	114590000	68827000	131830000
-1.1646	-0.302893	-1.57946	-1.27544	-0.180225	-0.12185	1.50804	1.52278	0.466379	-0.380821	0.799947	1.14761	-0.162753	1.12626	-0.39199	-1.01098	protein autophosphorylation [GO:0046777]	integral component of membrane [GO:0016021];plasma membrane [GO:0005886]	ATP binding [GO:0005524];protein serine/threonine kinase activity [GO:0004674]	+	6	6	5	8	8	7.2	113.75	0	14.433	1580900000	32	216650000	219590000	161870000	145520000	84828000	219870000	75271000	77533000	10292000	12003000	23963000	16974000	17204000	11258000	77110000	18835000	15879000	68989000	17651000
-1.56757	0.447057	-0.2578	-1.29686	1.28929	0.607085	1.34296	1.09626	-1.4664	-1.08551	-0.133328	-0.0898145	-0.48422	-0.321708	0.85617	1.06439	jasmonic acid and ethylene-dependent systemic resistance [GO:0009861];protein autophosphorylation [GO:0046777];regulation of innate immune response [GO:0045088]	cytosol [GO:0005829];integral component of membrane [GO:0016021];plasma membrane [GO:0005886];plasmodesma [GO:0009506]	ATP binding [GO:0005524];protein serine/threonine kinase activity [GO:0004674]	+	16	16	14	17.5	17.5	15.7	112.28	0	35.216	2664700000	70	62672000	76078000	67331000	45689000	56361000	94492000	68565000	41775000	82456000	193060000	138280000	46564000	218490000	141200000	147560000	167960000	104940000	62891000	118990000
-1.83394	-1.56447	-1.22866	-0.591201	0.226851	0.234777	0.372632	0.0779421	-0.793753	-0.420624	0.0513283	0.772097	1.05551	1.41029	0.914933	1.31629	actin filament bundle assembly [GO:0051017]		actin filament binding [GO:0051015]	+	10	8	8	18.7	13.6	13.6	65.526	0	8.5699	3978000000	56	397610000	409370000	428800000	198050000	398600000	121900000	254320000	451440000	38129000	53330000	34979000	65389000	63665000	56491000	61542000	59364000	47552000	45589000	71578000
0.64108	2.07433	1.31186	1.11354	-0.0130776	0.23829	-0.673606	0.130519	-2.21006	0.453683	-0.470553	-0.643042	-0.688544	-0.284218	-0.353928	-0.626278		chloroplast [GO:0009507]	ferredoxin-NADP+ reductase activity [GO:0004324]	+	44	2	2	90.2	4.7	4.7	28.694	0	11.126	2139700000	32	0	0	0	0	5615400	0	0	0	190370000	270850000	262210000	221800000	20115000	25286000	114990000	32601000	12814000	130840000	153010000
2.03821	1.64447	0.268275	0.328717	0.679068	-0.626815	0.190811	0.358312	-0.31557	-1.81377	-0.329356	-1.65183	-0.657594	-0.111007	0.367438	-0.369367		cytosol [GO:0005829];extracellular region [GO:0005576];plasma membrane [GO:0005886]	hydrolase activity [GO:0016787]	+	10	10	10	41.3	41.3	41.3	26.508	0	38.334	5358500000	85	147920000	179470000	117890000	187210000	285210000	298470000	347030000	320440000	309120000	338350000	329810000	267750000	119520000	165830000	186370000	192590000	176260000	87768000	209050000
0.651772	0.679152	0.40466	0.607958	0.220696	0.44622	0.500222	0.345253	-1.33109	0.525163	-1.59405	-2.80906	0.398333	0.204954	0.341941	0.407869		nucleus [GO:0005634]	DNA binding [GO:0003677]	+	3	3	3	16.3	16.3	16.3	26.586	0.0048913	1.8599	655090000	17	44063000	45531000	37815000	35409000	21865000	44094000	38009000	39658000	33792000	32376000	23171000	30406000	14181000	19052000	21723000	16675000	32163000	18738000	26235000
0.318714	0.795135	0.386711	0.669477	-1.87228	-2.68745	-0.576507	-0.612731	0.837646	0.288856	0.484559	0.884884	0.0390948	0.540198	0.32169	0.181995	chaperone cofactor-dependent protein refolding [GO:0051085];protein folding [GO:0006457];protein refolding [GO:0042026]	chloroplast [GO:0009507];chloroplast stroma [GO:0009570];cytosol [GO:0005829];cytosolic ribosome [GO:0022626];mitochondrion [GO:0005739];plastid [GO:0009536]	ATP binding [GO:0005524]	+	79	45	45	88.6	63.5	63.5	63.324	0	323.31	28068000000	343	2691600000	3213000000	2556400000	2363000000	3197500000	3364500000	2998400000	3403500000	284150000	290550000	273100000	413700000	130660000	136560000	179170000	234300000	315160000	202040000	334790000
-0.844448	0.30929	-0.750158	-0.710925	-0.132904	-0.69267	-1.05325	0.0166506	0.138492	-0.664912	0.787516	-1.05934	2.21755	0.90036	1.86489	-0.326142		cytosol [GO:0005829]	metal ion binding [GO:0046872];metalloendopeptidase activity [GO:0004222]	+	39	39	39	37	37	37	117.17	0	226.35	7476100000	149	746860000	814850000	569610000	645560000	940550000	1433500000	789620000	953290000	19968000	30081000	32270000	8487100	66940000	14614000	4496300	17421000	0	3976700	24279000
-0.408758	-0.947958	-0.718354	-0.847694	1.78551	-0.570939	0.244832	-1.03414	1.66914	0.6394	1.90866	-0.450105	-0.396952	0.31498	-0.429794	-0.757837			alcohol dehydrogenase (NAD+) activity [GO:0004022];oxidoreductase activity [GO:0016491];oxidoreductase activity, acting on the CH-OH group of donors, NAD or NADP as acceptor [GO:0016616]	+	10	10	10	30.4	30.4	30.4	35.194	0	35.441	2508300000	36	171250000	182730000	153610000	162640000	372030000	471620000	444560000	525440000	0	0	0	0	4561100	0	0	0	4387900	6260800	9231000
0.462069	0.475607	0.392943	0.274263	0.353388	0.340998	-2.48225	-2.59997	0.445546	0.58939	0.502395	0.464434	0.186511	0.199345	0.224812	0.170513	peptidyl-serine phosphorylation [GO:0018105];peptidyl-threonine phosphorylation [GO:0018107]	cytoplasm [GO:0005737];cytosol [GO:0005829];plasma membrane [GO:0005886]	ATP binding [GO:0005524];protein serine/threonine kinase activity [GO:0004674]	+	14	14	14	17.1	17.1	17.1	131.24	0	49.915	2990900000	36	96480000	135410000	152120000	119670000	220720000	320980000	193340000	211280000	122270000	114150000	115860000	94843000	71897000	81079000	78330000	72464000	115320000	105230000	128290000
-0.482073	0.33309	-2.11777	-1.12278	0.235792	1.57677	0.93239	1.00466	-0.113649	0.00736703	-0.607501	-1.32122	0.831429	0.529133	0.976406	-0.662029			hydrolase activity [GO:0016787]	+	8	8	8	27	27	27	30.618	0	12.366	2174700000	42	17121000	0	0	0	18185000	7839400	0	0	146150000	183360000	120470000	93171000	90299000	101670000	104860000	148010000	131620000	88585000	97594000
-1.23177	-0.811544	-1.14122	-1.36296	-0.172425	-0.159168	-0.890053	-0.58007	1.22992	0.602052	1.45161	1.95879	0.13623	-0.133631	0.638921	0.465326		cell wall [GO:0005618];cytosol [GO:0005829];mitochondrion [GO:0005739];nucleus [GO:0005634];plasma membrane [GO:0005886];plasmodesma [GO:0009506]	ATP binding [GO:0005524]	+	116	25	25	91.6	36.8	36.8	91.68	0	323.31	54686000000	732	3326200000	3788100000	3043900000	2920700000	3569100000	3769900000	3759300000	4065600000	1727500000	1554100000	2008900000	1519800000	1030200000	1471600000	1315600000	1468300000	1922600000	1271900000	1900200000
0.518076	0.811968	0.627789	0.0605382	-0.48092	0.820441	-0.344465	-2.05733	1.03885	0.232288	1.26591	0.261657	0.368898	-2.2594	-0.421862	-0.442442	chloroplast rRNA processing [GO:1901259];regulation of RNA metabolic process [GO:0051252]	chloroplast [GO:0009507];chloroplast envelope [GO:0009941];chloroplast stroma [GO:0009570];chloroplast thylakoid membrane [GO:0009535];nucleus [GO:0005634];plastid [GO:0009536];ribonucleoprotein complex [GO:1990904]	mRNA binding [GO:0003729];RNA binding [GO:0003723]	+	25	25	25	53.1	53.1	53.1	32.674	0	150.77	24124000000	293	5098000	7873500	0	15682000	10458000	21216000	0	9897300	1433700000	1531800000	1563400000	1731700000	1210000000	1800900000	1148100000	1224500000	1558500000	1574300000	1837100000
-1.37995	-1.48655	-1.42193	-1.55828	0.562148	0.748076	0.948389	0.886935	-0.43295	-0.155104	-0.238912	-0.218419	0.886935	0.986232	1.08444	0.788947			nucleotide binding [GO:0000166];oxidoreductase activity, acting on the aldehyde or oxo group of donors, NAD or NADP as acceptor [GO:0016620]	+	70	20	20	88.4	49.4	49.4	33.905	0	323.31	428630000000	1302	23552000000	22441000000	17473000000	17626000000	25228000000	26845000000	24675000000	27964000000	11205000000	11707000000	12340000000	11813000000	11616000000	16038000000	14461000000	17983000000	13072000000	11330000000	14750000000
1.6164	1.50911	0.374159	0.336147	0.784606	0.771814	0.148838	0.648248	0.247316	0.190357	-1.15578	-1.40464	-0.989737	-1.48688	-1.20881	-0.381148				+	23	21	21	45	42.7	42.7	52.666	0	160.2	10718000000	179	8773300	0	0	42654000	0	0	5994100	0	994160000	916320000	943170000	845780000	551150000	730890000	634830000	784140000	627520000	515070000	571060000
-0.585889	1.10079	-0.720365	-2.12	-0.654125	0.0820751	0.127042	-1.94264	0.285098	1.05308	0.980544	1.17146	-0.0862686	0.379794	0.687671	0.241742				+	1	1	1	5.9	5.9	5.9	25.577	0.0013077	2.3395	66375000	6	0	0	0	0	0	3110100	0	0	3846100	0	3713200	0	0	0	0	0	7024000	6224800	8396400
1.14191	0.874415	1.27239	1.03366	-1.50782	-1.00025	0.268683	1.00963	0.694947	-0.416781	-1.08385	0.831453	-0.0627509	-1.35334	-0.662217	-1.04007				+	3	3	3	13.8	13.8	13.8	36.68	0	9.5236	391950000	16	30471000	35960000	27202000	31811000	55555000	50054000	40045000	40327000	8362700	6993500	9289500	7852800	2488200	3380400	5295800	0	7009800	3494300	3967100
-1.86832	-0.200462	-2.72566	-0.00169515	0.704268	0.394617	0.0294195	0.733198	-0.0551702	-0.328763	0.837146	0.529338	0.206487	-0.0105758	0.584125	1.17205	carbohydrate metabolic process [GO:0005975];ethylene biosynthetic process [GO:0009693];regulation of ethylene biosynthetic process [GO:0010364];regulation of leaf senescence [GO:1900055];starch metabolic process [GO:0005982];trehalose metabolic process [GO:0005991]	cytosol [GO:0005829]		+	24	24	24	13.2	13.2	13.2	244.38	0	65.442	3877900000	66	321730000	282140000	321600000	275490000	259340000	410780000	296910000	313040000	0	25043000	0	106640000	64803000	18971000	122780000	170130000	14921000	11947000	79016000
-0.559256	0.792152	0.145939	0.219529	0.617217	-0.520328	0.68938	0.780773	0.511577	0.763379	0.657974	0.646716	-1.72663	-2.18994	0.689793	-1.51828	nucleus organization [GO:0006997];regulation of nucleus size [GO:0097298]	cytoplasmic chromatin [GO:0000789];cytosol [GO:0005829];mitochondrion [GO:0005739];nuclear envelope [GO:0005635];nuclear lamina [GO:0005652];nuclear membrane [GO:0031965];nuclear periphery [GO:0034399];nucleoplasm [GO:0005654];nucleus [GO:0005634]		+	30	30	30	26	26	26	129.09	0	110.28	10317000000	97	2025300000	2858000000	285590000	343060000	811890000	735220000	814440000	659250000	97335000	136980000	123360000	115620000	77416000	117670000	107440000	127060000	100640000	106520000	120000000
0.591506	0.428076	0.586294	0.108473	-0.620954	-0.505097	-0.385425	-0.971793	-0.0406363	-1.67582	-1.06172	-1.39153	1.6488	1.00476	1.42997	0.855102	carbohydrate metabolic process [GO:0005975];glycerol-3-phosphate metabolic process [GO:0006072]		glycerol kinase activity [GO:0004370]	+	47	47	47	76.1	76.1	76.1	52.483	0	323.31	54295000000	625	3790800000	3902200000	2675000000	2536200000	5324500000	5244500000	4752600000	5010400000	1502900000	1377700000	1879800000	1576900000	913330000	899050000	958960000	1073600000	1178400000	769690000	1176200000
-1.74441	-1.43733	-1.4545	-1.49927	0.196838	0.178833	0.390238	0.408947	0.477531	0.417299	0.499371	1.31734	1.41191	-0.00131054	-0.0310451	0.869555		cytoplasm [GO:0005737];cytosol [GO:0005829];extracellular region [GO:0005576];nucleus [GO:0005634]		+	49	43	43	28.5	24.9	24.9	198.77	0	161.2	10927000000	282	0	0	0	23745000	0	0	5073800	0	311530000	372370000	478810000	488090000	512250000	585040000	637240000	712110000	718030000	538690000	777830000
1.19584	0.995164	1.01195	1.06279	1.10263	0.0523882	1.07222	-1.61838	-0.497428	0.093753	-0.999602	-0.899817	-0.373254	0.0336202	-0.506633	-1.72524	peptide metabolic process [GO:0006518];proteolysis [GO:0006508]	cytoplasm [GO:0005737]	metal ion binding [GO:0046872];metalloendopeptidase activity [GO:0004222]	+	2	2	2	3.2	3.2	3.2	80.29	1	-2	498600000	2	152100000	77237000	38261000	30872000	53367000	5682700	48169000	71468000	5209900	2899500	3525600	3651500	2923800	0	3234600	0	0	0	0
-0.182723	-2.47787	0.255253	-2.20088	-0.128114	0.205315	0.514204	0.731145	0.868488	0.57548	0.741706	-0.185206	0.543436	-0.453546	0.298878	0.894427	endoplasmic reticulum to Golgi vesicle-mediated transport [GO:0006888]	cytoplasm [GO:0005737];mitochondrion [GO:0005739];nucleus [GO:0005634];TRAPP complex [GO:0030008]		+	4	4	4	36.3	36.3	36.3	15.264	0	5.8748	680040000	12	76490000	43825000	35274000	26052000	45457000	84508000	83023000	46662000	10933000	0	16942000	0	8089500	12396000	16730000	20382000	22944000	13444000	23678000
0.982301	1.3808	1.6377	1.27186	0.147601	0.172941	0.24415	0.569744	-1.34123	-1.1124	-1.43894	-1.24024	-0.404376	-0.445995	-0.596339	0.172416	acyl-CoA metabolic process [GO:0006637];fatty acid catabolic process [GO:0009062]	peroxisome [GO:0005777]	acyl-CoA hydrolase activity [GO:0047617]	+	20	20	20	47.8	47.8	47.8	48.155	0	64.273	8787900000	207	150610000	244180000	167990000	186060000	265330000	282720000	279640000	263160000	602620000	554110000	581610000	568550000	334180000	350830000	393760000	369930000	377880000	262290000	372210000
0.806583	1.59238	-0.0377393	-0.0482606	0.571715	1.43583	0.595562	0.144828	-1.39198	-0.55868	-1.29862	-2.02622	0.091627	0.842473	-0.243253	-0.476252	RNA catabolic process [GO:0006401]	extracellular region [GO:0005576];secretory vesicle [GO:0099503]	endoribonuclease activity [GO:0004521];ribonuclease T2 activity [GO:0033897];RNA binding [GO:0003723]	+	12	12	12	37.2	37.2	37.2	28.186	0	59.881	5341600000	120	359750000	431000000	239740000	217940000	257760000	516930000	539750000	491750000	193570000	176390000	139920000	183030000	94355000	90559000	166420000	102100000	165590000	86478000	135830000
0.96363	-0.358543	0.847672	1.25834	0.130035	0.0232325	-0.0162576	0.453657	-0.257037	-1.58564	-0.0923655	-2.62958	0.962171	-0.686683	0.614211	0.373158	fatty acid metabolic process [GO:0006631]	peroxisome [GO:0005777]	ligase activity [GO:0016874]	+	8	8	8	16.5	16.5	16.5	61.073	0	7.277	1417500000	32	243270000	121170000	132790000	214530000	106920000	160360000	88412000	117680000	20367000	10147000	26576000	30625000	18824000	15218000	14935000	27420000	12385000	0	15675000
2.35348	-0.0968162	1.34633	0.995992	-0.712705	0.716128	-0.412503	-0.186197	-1.37739	0.700408	-0.76817	0.35029	-0.943751	-0.422198	-0.947249	-0.595638			ATP binding [GO:0005524];helicase activity [GO:0004386];nucleic acid binding [GO:0003676]	+	50	13	13	82.3	30.5	30.5	46.194	0	243.24	25946000000	100	2459200000	3019500000	2016300000	2243300000	3701400000	3667300000	3726400000	3465600000	220770000	136880000	121800000	241850000	70091000	71356000	29838000	72273000	73437000	79390000	132500000
-1.09996	-0.429423	-2.9595	-0.559461	0.562329	1.01086	0.392496	1.32083	-0.127916	0.424561	0.455678	0.101946	0.239717	-0.366607	0.796338	0.238117	detection of redox state [GO:0051776];photosystem stoichiometry adjustment [GO:0080005];protein autophosphorylation [GO:0046777];regulation of gene expression [GO:0010468];regulation of photosynthesis [GO:0010109]	chloroplast [GO:0009507];chloroplast stroma [GO:0009570]	kinase activity [GO:0016301];protein histidine kinase activity [GO:0004673];protein self-association [GO:0043621];quinone binding [GO:0048038]	+	7	7	7	13.7	13.7	13.7	66.842	0	36.094	915620000	33	0	0	0	0	0	8598300	0	2336500	18165000	23422000	15731000	37873000	58376000	106350000	76791000	90417000	61982000	63255000	54739000
0.0807304	0.197887	-0.0989174	0.0910674	-0.267439	0.247251	0.177308	-0.00397843	1.15009	0.768934	1.70219	1.44832	-1.23782	-1.3956	-1.813	-1.04701		integral component of membrane [GO:0016021];plasma membrane [GO:0005886];vacuole [GO:0005773]	mRNA binding [GO:0003729]	+	17	17	17	13.2	13.2	13.2	150.16	0	26.125	7847400000	118	722390000	673270000	548010000	581600000	980510000	1077100000	94336000	1064200000	124330000	134290000	147290000	145220000	80605000	135980000	119690000	135560000	139830000	97545000	208160000
1.67914	1.73424	1.03203	1.39657	-1.39564	-0.201373	0.39601	0.0457327	-0.344616	-0.912418	-0.867716	-0.568541	-1.33076	-0.418096	-0.0628019	-0.181759	tRNA aminoacylation for protein translation [GO:0006418]	cytosol [GO:0005829]	ATP binding [GO:0005524];tyrosine-tRNA ligase activity [GO:0004831]	+	39	39	34	50	50	43.4	84.717	0	113.02	22573000000	286	940250000	913700000	618160000	579800000	1280200000	1385800000	1123600000	1118000000	1155100000	1049600000	1346000000	1139800000	633870000	769490000	805120000	864150000	765980000	478510000	894120000
1.03872	0.462025	-0.0428638	0.62333	1.4149	1.50377	0.8669	0.937914	-1.16224	-1.30856	-1.00051	-1.31399	-0.120386	-0.279765	-1.14748	-0.471767	endosome to plasma membrane protein transport [GO:0099638];multivesicular body organization [GO:0036257];protein transport to vacuole involved in ubiquitin-dependent protein catabolic process via the multivesicular body sorting pathway [GO:0043328];vacuole organization [GO:0007033]	cytoplasm [GO:0005737];cytosol [GO:0005829];late endosome [GO:0005770];multivesicular body [GO:0005771];plasmodesma [GO:0009506]	protein self-association [GO:0043621];ubiquitin binding [GO:0043130]	+	46	46	46	50.5	50.5	50.5	95.208	0	280.6	24013000000	370	1777600000	1639300000	1328800000	1457500000	2522400000	2323000000	2274900000	1978300000	646100000	577390000	717180000	514800000	580870000	432180000	476820000	474540000	510770000	385440000	484540000
-0.916774	-0.00808608	-0.180249	0.0105141	-0.48321	-0.385437	0.442603	-0.548848	-0.379331	-1.32218	-1.27632	-0.796572	0.832524	1.59518	1.80617	1.61002	D-cysteine catabolic process [GO:0019447];ethylene biosynthetic process [GO:0009693];response to cadmium ion [GO:0046686]	chloroplast [GO:0009507];cytosol [GO:0005829];mitochondrion [GO:0005739];nucleus [GO:0005634]	cobalt ion binding [GO:0050897];D-cysteine desulfhydrase activity [GO:0019148];hydrolase activity [GO:0016787]	+	30	30	30	61.6	61.6	61.6	43.9	0	323.31	42139000000	444	434710000	456990000	309090000	352610000	448770000	476030000	455440000	426600000	2400500000	2703000000	2510100000	2404100000	1758400000	1955000000	2075700000	1924600000	2358400000	1583300000	2255000000
-1.40519	-0.985791	-0.259479	-1.92321	-0.182261	-0.396527	0.930952	0.859517	0.443803	-1.09348	-0.0198875	0.950253	1.16298	0.264062	-0.0110614	1.66532			ATP binding [GO:0005524]	+	20	10	10	18.4	10.4	10.4	135.99	0	8.4414	3833700000	32	104120000	206610000	183080000	180930000	208190000	255230000	198750000	238980000	40032000	64012000	90398000	38152000	245700000	82502000	128380000	128780000	100510000	45216000	428200000
-0.0559786	0.164989	0.865531	-0.153445	-2.58405	-1.47175	-0.518046	-0.496129	1.52599	-0.455189	0.651718	1.07158	0.400671	-0.00659884	0.471008	0.58971		chloroplast [GO:0009507];chloroplast envelope [GO:0009941];chloroplast stroma [GO:0009570];extracellular region [GO:0005576];mitochondrion [GO:0005739];plastid stroma [GO:0009532];thylakoid [GO:0009579]	serine-type endopeptidase activity [GO:0004252]	+	18	18	18	44.3	44.3	44.3	40.919	0	298.47	16867000000	187	57225000	110800000	28850000	87369000	132040000	143160000	91587000	131030000	1102100000	1072100000	1264700000	952730000	514470000	646650000	849150000	701580000	1424900000	494330000	1319900000
0.621078	1.2865	0.647446	0.593096	0.487566	0.63936	0.593473	-1.91752	0.911195	0.323089	0.643089	-0.570755	-0.45467	-0.578601	-1.83462	-1.38972		vacuole [GO:0005773]		+	13	13	12	9.3	9.3	8.9	228.95	0	22.572	1126300000	45	147010000	90461000	68595000	66291000	157180000	87153000	105690000	93256000	33670000	45864000	38285000	32931000	21441000	21522000	21251000	851660	19498000	4647100	33802000
0.153512	1.30194	1.28434	1.23572	-1.14045	-0.649433	0.267941	-1.06525	0.806879	-1.11117	0.852509	0.612419	-1.26896	-1.19178	-0.803654	0.71545		host cell nucleus [GO:0042025];nucleus [GO:0005634]	zinc ion binding [GO:0008270]	+	6	5	5	10.8	9.1	9.1	65.233	0	13.975	888720000	48	23757000	27244000	65110000	16685000	50056000	38164000	34223000	32327000	20931000	38408000	44659000	40633000	31854000	33081000	58108000	39289000	37229000	18336000	57256000
1.30969	1.61206	1.23061	1.70526	-0.933056	-0.829296	-1.25483	-1.41541	0.00732766	0.350618	-0.433197	0.278343	-0.596425	-0.208703	-0.38606	-0.436925				+	3	3	3	24.7	24.7	24.7	10.645	0	10.351	2109900000	22	7835300	7025200	8454200	0	40117000	41008000	38923000	38159000	198340000	259980000	299590000	256230000	33170000	58020000	40330000	47062000	96781000	89307000	92358000
-0.916442	-0.113141	-0.257463	-0.606361	0.16376	-0.0227617	0.831972	0.503849	-1.40818	-1.67358	-0.946091	-0.686742	1.21545	1.3314	1.30009	1.28424	leucyl-tRNA aminoacylation [GO:0006429]	chloroplast [GO:0009507];cytosol [GO:0005829];plasmodesma [GO:0009506]	aminoacyl-tRNA editing activity [GO:0002161];ATP binding [GO:0005524];leucine-tRNA ligase activity [GO:0004823]	+	109	109	109	77.1	77.1	77.1	123.45	0	323.31	72801000000	845	8817900000	8704000000	6768300000	6508200000	9013700000	9631000000	8568300000	9180700000	230840000	370540000	345450000	243410000	256130000	297620000	376310000	375590000	206630000	96491000	252360000
-0.0436727	0.730314	0.826049	1.02634	-1.30452	-0.79653	-0.327006	-0.116843	-0.791053	-2.3414	-0.338999	-0.2957	0.969295	0.678484	0.672929	1.45231		chloroplast [GO:0009507];cytoplasm [GO:0005737];cytosol [GO:0005829];mitochondrion [GO:0005739]	endopeptidase activity [GO:0004175];oligopeptidase activity [GO:0070012];serine-type endopeptidase activity [GO:0004252];serine-type exopeptidase activity [GO:0070008]	+	53	53	45	62.5	62.5	53.6	89.404	0	323.31	70260000000	848	2713700000	3728700000	2784400000	2631700000	3469100000	6961400000	3259600000	3530900000	2615800000	2502200000	2746600000	2685500000	1565100000	1731400000	2900700000	3069900000	1900300000	1400000000	2238300000
0.0377214	0.482905	0.313509	0.312235	-0.119649	-1.66527	-2.3256	-0.68898	-1.37356	0.80946	0.628883	0.23786	0.800728	0.597039	0.955744	0.996986	cellular response to heat [GO:0034605];mRNA processing [GO:0006397]	cytoplasmic stress granule [GO:0010494];cytosol [GO:0005829];nucleus [GO:0005634]	mRNA binding [GO:0003729];poly(A) binding [GO:0008143]	+	14	10	10	31.9	25.8	25.8	48.483	0	323.31	7062000000	88	612820000	531420000	511810000	531540000	990200000	1146400000	1052000000	1041100000	34909000	39958000	49514000	44000000	14666000	5118600	0	64054000	23089000	16647000	16801000
0.270244	0.456797	1.77858	1.53792	-1.10499	-1.02622	-1.64121	-0.462642	-0.0494109	1.73748	-0.0593494	-0.366559	0.277216	-0.781997	-0.268304	-0.297555	response to oxidative stress [GO:0006979]	mitochondrion [GO:0005739];nucleus [GO:0005634];peroxisome [GO:0005777]	oxidoreductase activity [GO:0016491];zinc ion binding [GO:0008270]	+	31	31	31	45.6	45.6	45.6	70.541	0	107.99	14196000000	265	319780000	340910000	245490000	205250000	361180000	439340000	435910000	426310000	769300000	778560000	873900000	857390000	570800000	595340000	540210000	592820000	767370000	580850000	757530000
-0.382774	1.0492	-0.693248	-0.373803	0.350898	1.18131	0.554232	1.20586	-1.23456	-1.72072	-0.940442	-0.0578567	0.231722	-1.16294	0.259245	1.73387		chloroplast [GO:0009507];chloroplast stroma [GO:0009570];cytoplasm [GO:0005737];nucleus [GO:0005634]	ATP binding [GO:0005524];ATPase activity [GO:0016887];GTP binding [GO:0005525];ribosomal large subunit binding [GO:0043023];ribosome binding [GO:0043022]	+	30	30	30	76.5	76.5	76.5	45.628	0	323.31	48319000000	480	112960000	132520000	103850000	100780000	227780000	311520000	211450000	234690000	3052800000	2858700000	3444200000	3016900000	2046900000	2862300000	2682500000	2975600000	2805700000	1823300000	2989000000
-0.65103	1.01085	0.918488	-0.728016	1.07591	-1.4836	-0.244622	-1.13124	1.04648	0.955838	1.20508	1.07138	-1.23665	-0.213075	-0.684565	-0.911232	biosynthetic process [GO:0009058];cell division [GO:0051301];chloroplast fission [GO:0010020];chloroplast organization [GO:0009658];regulation of cell shape [GO:0008360]	chloroplast [GO:0009507];chloroplast nucleoid [GO:0042644]	acid-amino acid ligase activity [GO:0016881];ATP binding [GO:0005524]	+	6	6	6	12	12	12	85.586	0	7.1713	299550000	6	13682000	15166000	16189000	18228000	10034000	9751900	0	0	0	10579000	17092000	0	13899000	11742000	0	0	35991000	26501000	65644000
0.622357	1.93076	1.19677	1.03111	-0.523413	-0.908006	-0.919573	0.0988967	-1.39058	-0.964177	-1.37712	-0.607737	0.093346	0.121133	0.730978	0.865258	response to cadmium ion [GO:0046686]	apoplast [GO:0048046];chloroplast [GO:0009507];chloroplast envelope [GO:0009941];chloroplast stroma [GO:0009570];cytosol [GO:0005829];nucleus [GO:0005634];plasma membrane [GO:0005886];vacuole [GO:0005773]	metallopeptidase activity [GO:0008237];zinc ion binding [GO:0008270]	+	119	119	119	85.5	85.5	85.5	109.41	0	323.31	465150000000	2778	11321000000	11085000000	8857200000	8788400000	10771000000	11614000000	10528000000	10148000000	26878000000	26068000000	30937000000	27467000000	16586000000	19693000000	20502000000	22265000000	23137000000	16453000000	19325000000
-1.62013	-0.450699	-1.35633	-1.44336	-0.67999	-0.00593223	-1.02601	0.29204	1.13964	1.04933	1.37579	0.92262	0.527788	-0.20775	0.537157	0.945826		mitochondrion [GO:0005739];plasma membrane [GO:0005886]	GTP binding [GO:0005525];GTPase activity [GO:0003924];translation initiation factor activity [GO:0003743]	+	44	44	44	32.7	32.7	32.7	142.11	0	323.31	73332000000	285	4341000000	5114500000	1530200000	4625900000	2324500000	2193500000	1832400000	1970000000	3463100000	3651300000	313250000	226780000	3361300000	4019800000	3860500000	3899600000	3918600000	3852000000	4379400000
-0.352382	0.918875	-0.173707	0.483745	-2.33722	-1.22628	-0.73958	-1.52729	0.833184	0.380203	1.20205	0.820862	0.611076	0.713345	0.150035	0.24308			Hsp90 protein binding [GO:0051879]	+	8	8	8	28.1	28.1	28.1	40.51	0	11.221	1880200000	30	277890000	131880000	87434000	105600000	117050000	136380000	140880000	158500000	54316000	63371000	29817000	52795000	32841000	48005000	48809000	15619000	84037000	32006000	54315000
1.13247	0.78173	0.893838	1.5366	-0.802746	-1.15377	-1.94414	-0.790348	0.454449	-0.90541	-1.25254	0.660785	0.349041	0.192266	0.514628	0.333144		plasma membrane [GO:0005886]	S100 protein binding [GO:0044548];tubulin binding [GO:0015631];ubiquitin protein ligase binding [GO:0031625]	+	2	2	2	10.5	10.5	10.5	25.687	0	3.8032	241380000	9	18057000	20141000	12135000	1618300	24444000	27101000	23680000	14876000	8536900	7248100	19388000	21446000	0	0	0	0	5238300	0	0
1.19023	-0.351458	1.34331	1.22617	-0.575088	0.787351	1.7648	-0.180199	-0.699902	-1.54801	0.367833	-0.361039	-0.210678	-0.781473	-1.37528	-0.596565			ATP binding [GO:0005524];hydrolase activity [GO:0016787]	+	18	8	8	19.1	9	9	111.04	0	15.415	557170000	22	64755000	53846000	57043000	55979000	69584000	63374000	80857000	97853000	2859700	0	3590000	2891500	0	0	4532900	0	0	0	0
-1.48349	-2.20396	-0.30976	0.0912574	1.11738	-0.0344982	-0.946564	-0.546486	0.609268	0.810546	1.21222	1.00122	-0.737391	0.752093	-0.195272	0.863435	ubiquitin-dependent protein catabolic process [GO:0006511]	cytosol [GO:0005829];plasma membrane [GO:0005886]	ATP binding [GO:0005524];ubiquitin-protein transferase activity [GO:0004842]	+	8	2	2	40.5	10.5	10.5	21.259	0	26.836	2763400000	28	175390000	216340000	185900000	132800000	140290000	233900000	198800000	230340000	49807000	33492000	98599000	46311000	61470000	51817000	51344000	75581000	90165000	90075000	98147000
-1.64877	-1.02784	-1.44335	-1.08693	0.75195	0.402924	1.39944	0.0822042	1.07352	0.716145	0.624458	1.4101	0.458605	-0.416375	-0.657717	-0.638379	DNA repair [GO:0006281];mRNA splicing, via spliceosome [GO:0000398]	Prp19 complex [GO:0000974]	ubiquitin protein ligase activity [GO:0061630]	+	28	25	25	56.2	52	52	56.881	0	91.359	8810000000	175	576440000	690150000	493140000	423290000	903050000	956490000	801050000	750520000	164420000	165170000	186580000	165960000	164880000	218590000	176190000	238620000	294510000	120010000	269520000
-0.129879	-0.258613	-0.525036	-0.316149	1.37202	1.30045	1.6628	-0.28068	-0.0760487	-0.989281	-0.573344	1.93438	-0.155234	-1.06844	-1.17591	-0.721042		nucleus [GO:0005634];vacuolar membrane [GO:0005774];vacuole [GO:0005773]		+	3	2	2	22.6	22.6	22.6	10.444	0	42.027	1558400000	8	0	334530000	0	220480000	514500000	0	0	11485000	0	0	0	0	36092000	37661000	64178000	0	229900000	0	0
-0.0177564	0.0322406	-0.204875	-0.020961	0.328489	0.714277	0.429124	0.906039	-0.669541	-3.29727	-0.361468	-0.289194	0.27799	0.461879	0.706962	1.00406	regulation of phosphoprotein phosphatase activity [GO:0043666]	vacuolar membrane [GO:0005774]	protein phosphatase binding [GO:0019903];protein phosphatase regulator activity [GO:0019888]	+	35	35	35	46.6	46.6	46.6	89.887	0	205.66	12298000000	167	1055400000	1652800000	1221100000	863840000	1843700000	1838900000	1688400000	1764900000	15574000	11143000	15456000	18613000	10225000	41104000	21424000	55520000	13775000	0	9452800
-0.717174	-0.116489	-0.650442	-0.645432	-1.09008	-0.542495	0.0175931	0.598031	1.83023	1.22387	1.67415	1.18751	-0.142417	-0.486248	-0.767377	-1.37323	biosynthetic process [GO:0009058];cellular response to hypoxia [GO:0071456];L-alanine catabolic process, by transamination [GO:0019481];response to cadmium ion [GO:0046686];response to hypoxia [GO:0001666]	mitochondrion [GO:0005739];nucleus [GO:0005634]	ATP binding [GO:0005524];L-alanine:2-oxoglutarate aminotransferase activity [GO:0004021];pyridoxal phosphate binding [GO:0030170]	+	48	48	34	60	60	45.3	59.82	0	323.31	203960000000	1108	6374800000	6731500000	4843400000	5598900000	6672700000	7243900000	6633700000	6815500000	9226300000	8683000000	9997000000	10265000000	7081700000	7964600000	8991700000	9398500000	11038000000	7908700000	10468000000
0.403341	-0.0197759	0.28481	0.941214	0.709992	0.112877	0.828981	0.0982384	-2.01606	-2.15711	-0.946762	-0.88355	0.357131	0.270918	1.12832	0.887432	iron ion homeostasis [GO:0055072];iron ion transport [GO:0006826]	apoplast [GO:0048046];cell wall [GO:0005618];plasma membrane [GO:0005886];plasmodesma [GO:0009506];secretory vesicle [GO:0099503]	copper ion binding [GO:0005507];ferroxidase activity [GO:0004322]	+	20	17	16	36.3	31.7	28.8	60.577	0	222.07	24369000000	272	70081000	98488000	62981000	38773000	124820000	102820000	100330000	71779000	1523800000	1374300000	1672600000	1459300000	1196900000	1207600000	1433900000	1352100000	1286200000	925190000	1573100000
1.39851	1.45516	0.270173	0.890872	0.261078	0.428485	0.519558	0.772454	-2.21723	-0.108288	-0.527309	-1.22057	-0.0221534	-0.48238	-1.41872	0.000359296	regulation of transcription, DNA-templated [GO:0006355]	nucleus [GO:0005634]	transcription corepressor activity [GO:0003714]	+	7	6	5	7.4	6.6	5.8	150.82	0	6.5559	2094300000	8	51321000	49974000	46432000	184550000	295080000	52970000	54224000	46055000	111450000	102880000	94074000	97672000	62285000	74221000	78319000	83446000	70419000	56797000	73537000
-1.14964	0.703973	-1.77798	-2.27911	0.980207	0.840025	1.15956	0.175219	-0.203907	0.267023	0.426965	0.741509	-0.0996025	0.818236	-0.500647	-0.101834				+	5	5	5	3.9	3.9	3.9	193.59	0	5.4639	387450000	3	50049000	72060000	17596000	41019000	24089000	52160000	60096000	58011000	0	1972800	0	0	2259300	2131900	3474700	0	0	0	0
1.51606	1.52069	0.568627	1.63816	-0.779228	0.117478	0.0408125	-0.215268	0.261417	-0.0540581	-0.0625951	0.186005	-0.610653	-0.842571	-1.39208	-1.89279	mRNA processing [GO:0006397];mRNA transport [GO:0051028];nuclear-transcribed mRNA catabolic process, nonsense-mediated decay [GO:0000184];positive regulation of gene expression [GO:0010628];regulation of alternative mRNA splicing, via spliceosome [GO:0000381];regulation of translation [GO:0006417];RNA splicing [GO:0008380]	cytoplasm [GO:0005737];cytosol [GO:0005829];exon-exon junction complex [GO:0035145];nuclear body [GO:0016604];nuclear speck [GO:0016607];nucleolus [GO:0005730];nucleoplasm [GO:0005654];nucleus [GO:0005634]	mRNA binding [GO:0003729]	+	6	6	6	28.7	28.7	28.7	22.438	0	34.505	8308700000	86	594900000	675650000	476860000	545880000	802040000	855460000	813110000	725980000	257780000	215010000	209230000	252410000	104870000	161640000	162320000	151490000	190770000	155940000	188700000
-0.242755	0.205234	0.0911557	0.134067	-0.147108	0.871602	0.119088	0.384631	-1.81158	-2.87516	0.120601	0.219556	0.780705	0.466006	0.650214	1.03375	phosphatidylinositol dephosphorylation [GO:0046856]		hydrolase activity [GO:0016787]	+	3	3	3	4.6	4.6	4.6	73.897	0.0020325	2.1656	761240000	7	3815800	121770000	0	118330000	6912700	0	71462000	6783900	31069000	47369000	52349000	46544000	24478000	12202000	39596000	5425600	0	0	46189000
-1.6976	0.049836	0.610479	0.457851	0.641595	0.735033	0.804273	0.789421	0.83742	0.444051	-0.882141	0.965734	-1.89238	-1.50033	0.452441	-0.815687	starch biosynthetic process [GO:0019252]	chloroplast [GO:0009507]	glycogen (starch) synthase activity [GO:0004373];starch binding [GO:2001070];starch synthase activity [GO:0009011]	+	4	4	4	3.6	3.6	3.6	124.23	0	4.4516	244470000	7	0	0	0	13892000	0	0	7118400	0	10195000	11791000	14884000	16131000	12531000	12223000	13974000	11864000	30834000	15016000	11814000
-0.576348	-0.44622	0.729996	-0.506883	0.212501	-0.619606	1.45774	1.50274	-0.408094	-0.709695	-1.539	-1.01318	1.3223	-0.834533	1.53158	-0.103298	amine metabolic process [GO:0009308]	nucleus [GO:0005634]	copper ion binding [GO:0005507];primary amine oxidase activity [GO:0008131];quinone binding [GO:0048038]	+	21	21	19	31.3	31.3	29.1	76.673	0	89.202	8564400000	160	0	20176000	9415700	11739000	49817000	16965000	0	0	532050000	573150000	644270000	404120000	553210000	472190000	573360000	523230000	509560000	398810000	496410000
-1.63367	-1.43017	-1.31709	-1.52622	-0.695271	0.491741	0.367534	0.546668	0.355049	0.839006	0.853704	0.993057	0.49485	-0.396125	1.04085	1.01608		integral component of membrane [GO:0016021];nucleus [GO:0005634]	ATP binding [GO:0005524];protein kinase activity [GO:0004672]	+	16	16	13	20.1	20.1	17.4	98.075	0	53.876	8996200000	115	46873000	48493000	40416000	58318000	0	47246000	0	54824000	305910000	258500000	331750000	288630000	402740000	509600000	556570000	549640000	620320000	427950000	661180000
-0.595926	-0.806662	-0.573326	-0.389754	-0.184839	-0.866955	0.886082	1.17308	-1.3578	-0.653471	-0.198379	-1.36587	1.28834	0.775399	1.36026	1.50983		chloroplast [GO:0009507];cytoplasm [GO:0005737]	intramolecular transferase activity, phosphotransferases [GO:0016868]	+	16	16	15	43.4	43.4	41.1	38.605	0	32.761	5183000000	121	333410000	281080000	242180000	208880000	337360000	332030000	276240000	394700000	156650000	103480000	118110000	176220000	112370000	95979000	184240000	212290000	134950000	57739000	141620000
-0.916691	-1.05979	-0.893859	-1.28166	0.258602	-0.0347396	0.577467	-0.161521	-0.405896	-1.38941	-0.0515251	-0.146986	1.1712	0.931713	1.60819	1.79491			gamma-glutamyl-peptidase activity [GO:0034722]	+	25	25	22	67.6	67.6	67.6	36.957	0	323.31	69322000000	471	1148200000	1266700000	1463900000	1157700000	1282800000	1433800000	1372100000	1495100000	2487100000	2875200000	3862700000	3224100000	2892900000	3427900000	3970000000	3533800000	2921300000	2335400000	4472400000
1.33243	0.735068	1.39448	1.5445	-0.229742	-0.635433	-0.380017	-0.810047	0.700551	0.624223	0.376883	0.236758	-1.22153	-1.05706	-1.29557	-1.31551	carbohydrate metabolic process [GO:0005975];pentose-phosphate shunt, non-oxidative branch [GO:0009052]	chloroplast [GO:0009507];chloroplast envelope [GO:0009941];chloroplast stroma [GO:0009570];extracellular region [GO:0005576]	sedoheptulose-7-phosphate:D-glyceraldehyde-3-phosphate glyceronetransferase activity [GO:0004801];zinc ion binding [GO:0008270]	+	22	22	22	41.5	41.5	41.5	46.527	0	240.92	27220000000	257	901250000	895030000	730580000	895210000	2050300000	2143100000	1577800000	1947100000	1422700000	1230100000	1675600000	1555600000	590190000	714520000	719190000	664800000	1246500000	758650000	1150600000
-1.46557	-0.0180134	-0.789021	0.109937	1.68832	0.0638291	0.0920647	1.46796	-1.67728	0.695298	-1.4355	-0.484198	0.153464	0.0363172	0.355718	1.20667		endosome [GO:0005768];Golgi apparatus [GO:0005794];integral component of membrane [GO:0016021];membrane [GO:0016020];plasma membrane [GO:0005886];trans-Golgi network [GO:0005802];vacuole [GO:0005773]		+	9	9	9	13.1	13.1	13.1	68.971	0	24.981	4548900000	103	105430000	95725000	55032000	91537000	16882000	30443000	66720000	22705000	106440000	274490000	206580000	256100000	348960000	299420000	147790000	378980000	103520000	231310000	160150000
-0.133591	-0.200702	-0.535224	-0.564576	1.76987	2.07511	0.0331135	0.943743	0.159901	-0.508746	0.690816	-1.0303	-0.0139981	-1.90504	-0.0370792	-0.743299		nucleus [GO:0005634]	chromatin binding [GO:0003682]	+	13	13	13	14.1	14.1	14.1	94.889	0	21.155	2964700000	39	193280000	340920000	331280000	259360000	105960000	475990000	408350000	76698000	51562000	44678000	40271000	4703400	18264000	24630000	49367000	67532000	57443000	56564000	108740000
0.754829	0.873022	-1.54788	0.741744	0.589626	-1.0942	-1.2899	-0.0493302	1.00444	0.99148	0.960126	1.12068	-0.619334	-0.348257	-0.469805	-1.61724	ubiquinone biosynthetic process [GO:0006744]	mitochondrial inner membrane [GO:0005743];mitochondrion [GO:0005739];nucleus [GO:0005634]	lipid binding [GO:0008289]	+	4	4	4	17.3	17.3	17.3	34.412	0	4.4961	362320000	18	31056000	32336000	21554000	50550000	8066800	5889400	53436000	91627000	9657900	7906400	0	7871900	0	0	0	0	11142000	6402100	8888800
-0.0461353	-1.23777	0.70977	-0.259009	-0.927214	-0.293646	-0.316981	0.411426	-0.0244449	-0.490511	-0.962598	-1.39903	1.40731	-0.18656	1.84855	1.76684		endosome [GO:0005768];Golgi apparatus [GO:0005794];integral component of membrane [GO:0016021];intracellular membrane-bounded organelle [GO:0043231];nucleus [GO:0005634];trans-Golgi network [GO:0005802]	nucleotidyltransferase activity [GO:0016779]	+	7	7	7	8.8	8.8	8.8	119.96	0	10.39	869410000	15	74930000	88708000	66676000	86592000	157050000	100460000	121630000	142710000	0	0	0	0	0	0	0	0	0	0	0
1.70878	2.20553	1.10409	0.850686	-0.432079	-0.225279	-1.48598	-0.852181	-0.733633	0.0824873	-0.925257	-0.611149	-0.358893	-0.310759	-0.233041	0.216678				+	7	7	7	47.3	47.3	47.3	22.821	0	46.751	11823000000	63	36460000	17965000	0	8209400	11918000	23571000	17749000	31317000	477420000	663470000	622480000	550600000	428750000	670520000	684210000	893060000	664480000	394240000	658310000
-1.31363	-1.24378	-1.95239	-1.40857	1.19048	0.614254	1.03379	0.346667	-0.0614382	1.28417	-0.318421	0.409141	0.241758	-0.16398	0.813533	0.528412	embryo development ending in seed dormancy [GO:0009793];threonyl-tRNA aminoacylation [GO:0006435];tRNA aminoacylation for protein translation [GO:0006418]	chloroplast [GO:0009507];chloroplast stroma [GO:0009570];mitochondrion [GO:0005739]	aminoacyl-tRNA ligase activity [GO:0004812];ATP binding [GO:0005524];metal ion binding [GO:0046872];threonine-tRNA ligase activity [GO:0004829]	+	18	18	18	30.3	30.3	30.3	74.784	0	35.493	3281600000	81	12703000	0	0	8425100	0	12523000	0	7560200	134200000	99214000	96319000	107500000	157460000	184390000	183170000	230050000	218340000	149900000	288690000
0.425651	-0.0532305	1.19654	1.38871	0.837589	-0.902259	-0.875106	-0.638475	-1.81521	-1.66484	-0.696283	0.311392	0.152388	0.901785	0.356925	1.07443		cytoplasm [GO:0005737]	aminopeptidase activity [GO:0004177]	+	29	2	2	75.4	4	4	37.433	0	34.355	2196500000	28	47398000	50232000	32927000	33456000	47146000	47784000	57274000	52554000	152490000	101880000	177510000	187190000	107610000	65366000	54565000	49031000	53575000	49837000	96281000
-0.806785	-0.811317	-0.923022	-0.73901	1.1286	1.71115	0.506004	0.467434	-0.958547	-1.07281	-0.973616	-1.0726	0.42607	0.974435	0.975003	1.16902		extracellular region [GO:0005576]	serine-type endopeptidase activity [GO:0004252]	+	40	40	40	45.7	45.7	45.7	87.919	0	227.41	27705000000	294	170080000	167660000	144050000	129590000	323620000	322270000	223830000	251160000	1103100000	969670000	1159000000	1122400000	1765700000	2076600000	1990600000	2139000000	1100100000	578590000	898600000
-1.38247	0.762427	-1.74658	-0.581109	-0.319771	-0.765398	0.500447	-0.651161	0.064613	1.22482	0.872167	1.36545	1.46856	0.634113	-0.616237	-0.829877	ATP-dependent chromatin remodeling [GO:0043044];defense response [GO:0006952];ethylene-activated signaling pathway [GO:0009873];flower development [GO:0009908];organ boundary specification between lateral organs and the meristem [GO:0010199];positive regulation of transcription by RNA polymerase II [GO:0045944];regulation of defense response to fungus [GO:1900150];regulation of ethylene-activated…	cytosol [GO:0005829];nucleus [GO:0005634]	ATP binding [GO:0005524];ATPase activity [GO:0016887];DNA binding [GO:0003677];DNA-dependent ATPase activity [GO:0008094];helicase activity [GO:0004386];histone binding [GO:0042393]	+	13	13	13	4.4	4.4	4.4	389.86	0	23.756	859920000	31	83292000	98031000	75915000	54191000	164410000	129540000	108230000	134140000	0	1413500	0	0	0	0	0	0	0	2279500	1814900
-0.99344	-0.720497	-0.631903	-1.58762	1.36476	0.754144	1.40438	0.99897	-0.768185	-0.0428306	-1.03197	-1.23147	0.140956	0.704508	0.557541	1.08265			ATP binding [GO:0005524];protein kinase activity [GO:0004672]	+	41	41	41	55.9	55.9	55.9	86.045	0	209.26	16050000000	297	1461100000	1451500000	985320000	1212500000	1633100000	1518400000	1349500000	1394400000	271000000	291440000	319390000	261190000	244650000	334630000	354710000	316190000	226730000	208480000	308440000
1.6618	1.00797	1.15913	1.65452	-1.08183	-0.969329	-1.10914	-0.900227	0.216623	0.108834	0.145517	0.668841	-0.508714	-1.31167	-0.694259	-0.0480623			UDP-glycosyltransferase activity [GO:0008194]	+	38	10	9	53.8	25.5	24.5	55.194	0	29.378	2154200000	54	281700000	308790000	248270000	157090000	162940000	170750000	225680000	220060000	53541000	69575000	86670000	49177000	6571300	7408700	0	6580600	7516000	16500000	11060000
0.200274	-0.244185	-0.673588	-0.86603	-0.239412	0.403961	0.121289	0.850934	-0.867185	-1.61834	-1.13401	-1.04306	1.37417	1.54766	1.49128	0.696242	carbohydrate metabolic process [GO:0005975]		beta-galactosidase activity [GO:0004565];carbohydrate binding [GO:0030246]	+	43	41	41	46	46	46	92.565	0	323.31	22938000000	354	180870000	156290000	82716000	117250000	202130000	270400000	205640000	145500000	1531800000	1272100000	1583400000	1124100000	1055100000	1304900000	1227100000	1395600000	1150300000	765800000	1130500000
0.315615	0.115878	-1.06785	-0.665611	1.16103	1.40767	0.205647	1.77175	-2.16623	0.0682506	-0.984523	-0.946052	0.239891	0.386528	0.0022411	0.155771	cell cycle [GO:0007049];cell division [GO:0051301];lateral root morphogenesis [GO:0010102];response to auxin [GO:0009733]	cortical microtubule [GO:0055028];phragmoplast [GO:0009524];plasma membrane [GO:0005886];plasmodesma [GO:0009506];preprophase band [GO:0009574]		+	23	23	23	18	18	18	186.86	0	33.241	3403400000	92	151670000	202760000	163050000	159320000	236770000	325480000	264410000	270110000	144140000	120320000	107280000	111590000	102160000	114070000	70036000	122310000	61988000	83908000	73641000
1.63323	1.11944	0.624024	0.433936	-1.42868	-0.160851	-0.228724	-0.578803	1.42915	-0.250086	0.952728	0.674801	-0.878402	-0.883957	-1.17447	-1.28333			serine-type carboxypeptidase activity [GO:0004185]	+	21	21	20	51.1	51.1	51.1	36.756	0	323.31	58545000000	462	47009000	137140000	102990000	50241000	151170000	172260000	84722000	123570000	4982600000	3925500000	5264900000	4190700000	2423600000	2605100000	2862300000	2887400000	4679200000	2670000000	4958400000
-1.05762	-1.93147	0.555808	-0.624044	-0.322952	-0.503684	-0.111771	0.0676562	0.277118	1.17454	0.132495	2.27036	0.322239	0.668692	0.400748	-1.31811				+	6	2	2	21.5	10	10	28.337	0	6.709	346780000	5	0	0	0	0	0	0	0	0	21617000	17468000	15943000	10453000	19078000	19966000	11908000	11117000	28446000	20558000	28610000
-1.58761	-1.58422	-0.628673	-1.19001	-0.8706	0.231021	-0.290971	0.711414	1.52805	0.0205787	1.3659	1.41147	0.65864	-0.193769	0.253625	0.165156		cytosol [GO:0005829];peroxisome [GO:0005777]	oxidoreductase activity [GO:0016491]	+	18	18	16	57.3	57.3	53.4	32.899	0	323.31	22817000000	194	57537000	32155000	4615600	41603000	43571000	27970000	35695000	27364000	1023500000	1045500000	1317900000	1053900000	757870000	1156400000	1279600000	1483200000	1945400000	1161100000	1791000000
-1.33996	-1.19928	0.328797	-1.90974	-1.10864	0.0332215	-0.406966	-0.258846	0.357539	0.0582456	0.328319	0.495583	0.507063	1.6908	1.28301	1.14085	mRNA processing [GO:0006397]	nucleus [GO:0005634]	RNA binding [GO:0003723]	+	13	13	13	24	24	24	67.362	0	83.393	3075600000	63	313050000	384440000	252840000	270540000	419300000	442970000	335490000	361130000	4959600	6742700	14317000	3292800	4089400	12752000	11488000	14417000	18130000	22708000	13182000
2.0876	0.467623	1.51071	0.545463	-1.1637	-0.0711452	0.094561	-1.0441	-0.760688	-0.20326	-0.203468	-0.0498279	-0.478976	-1.64724	-0.36596	1.28241	anther wall tapetum development [GO:0048658];cellular response to reactive oxygen species [GO:0034614];chloroplast disassembly [GO:1904821];protein ubiquitination [GO:0016567];root development [GO:0048364]	cytoplasm [GO:0005737]	ubiquitin protein ligase activity [GO:0061630]	+	14	14	14	21.4	21.4	21.4	90.344	0	52.761	1247100000	37	129700000	102120000	103660000	89367000	166020000	213710000	186050000	165380000	10014000	3145100	3810200	14867000	663710	1824300	2155900	0	0	1403300	1980000
1.18081	1.5382	1.397	-0.626961	0.210367	-0.252543	-1.33073	-0.571759	-0.584917	-1.3663	-1.34676	0.432728	1.23221	0.121599	-0.704057	0.671102	embryo development ending in seed dormancy [GO:0009793];rRNA processing [GO:0006364]	integral component of membrane [GO:0016021];Noc4p-Nop14p complex [GO:0030692];nuclear membrane [GO:0031965];nucleolus [GO:0005730];nucleoplasm [GO:0005654];small-subunit processome [GO:0032040]		+	4	4	4	8.1	8.1	8.1	65.348	0	11.109	344650000	12	14507000	12154000	13685000	11081000	36785000	51779000	47569000	52298000	18781000	41539000	34156000	0	0	0	0	0	0	0	0
-0.317018	0.139508	0.0929849	-0.89512	0.334691	0.251942	0.291784	3.22269	-0.855382	-0.786276	-0.259365	0.26184	-0.829817	0.140384	-1.07297	0.280122		mitochondrion [GO:0005739]	magnesium ion binding [GO:0000287]	+	7	2	2	37.9	14.7	14.7	13.067	0	47.088	5483200000	8	0	0	0	0	0	0	0	0	25556000	109620000	101580000	0	126510000	110970000	124770000	4515100000	13226000	0	32905000
-1.72866	-0.970752	-0.372859	-1.47139	-0.10439	-0.218971	1.29965	1.21336	1.40681	0.72377	1.10618	0.701952	-0.626307	-0.497477	-0.768925	0.308014	DNA replication initiation [GO:0006270]	MCM complex [GO:0042555];nucleus [GO:0005634]	ATP binding [GO:0005524];DNA helicase activity [GO:0003678];DNA replication origin binding [GO:0003688]	+	8	8	8	13.7	13.7	13.7	80.814	0	16.108	901020000	25	100630000	68077000	113040000	79378000	134830000	170940000	80989000	110420000	0	0	0	0	0	0	7730800	6905700	10391000	6404600	6813300
-0.616534	-1.6788	-1.53547	-1.22501	0.170673	0.191403	-0.564908	0.282549	1.5749	0.78163	1.39084	1.21385	-0.536457	-0.346564	0.1588	0.739093	post-embryonic root development [GO:0048528]	cytoplasm [GO:0005737];cytosol [GO:0005829];nucleus [GO:0005634];plasma membrane [GO:0005886]	calcium ion binding [GO:0005509]	+	22	19	18	62	55.8	55.8	30.968	0	279.58	16548000000	238	283730000	328950000	190210000	213350000	509150000	666680000	456510000	530770000	847650000	730880000	773050000	745820000	692390000	724530000	703000000	778540000	1046700000	782370000	1028100000
1.31078	1.43627	1.35264	1.45547	0.0970403	0.11033	0.30993	-0.273457	-1.99609	-0.524176	-0.174472	-0.323669	-0.810047	-1.05104	-0.96005	0.0405491			RNA binding [GO:0003723]	+	8	8	8	12	12	12	91.899	0	10.657	1448500000	46	178580000	162560000	172100000	160300000	137920000	135630000	112120000	122270000	35999000	45007000	76223000	70898000	5034300	5622900	6157200	2312300	0	1174000	5175900
1.42397	1.09603	-0.357581	0.125898	0.633421	0.536759	0.905121	1.73947	-0.88217	-1.58574	-1.66535	-0.504642	-0.0648033	-0.565443	-0.194236	-0.640698	cristae formation [GO:0042407];cysteinyl-tRNA aminoacylation [GO:0006423];polar nucleus fusion [GO:0010197];regulation of programmed cell death [GO:0043067]	chloroplast [GO:0009507];chloroplast stroma [GO:0009570];cytoplasm [GO:0005737];cytosol [GO:0005829];mitochondrion [GO:0005739]	ATP binding [GO:0005524];cysteine-tRNA ligase activity [GO:0004817];metal ion binding [GO:0046872]	+	31	31	31	51	51	51	63.913	0	188.02	13954000000	270	4415500	7720500	18259000	0	11461000	17328000	0	5857900	1034300000	931260000	1023600000	917840000	702130000	728970000	894190000	865480000	876900000	578990000	813820000
1.48869	1.96333	1.58841	1.42048	-0.470868	-0.717558	-0.7242	-0.367	-0.463725	-1.0365	-0.180702	-0.128212	-0.412527	-0.677233	-0.959803	-0.322584	hydrogen peroxide catabolic process [GO:0042744];response to oxidative stress [GO:0006979]	extracellular region [GO:0005576]	heme binding [GO:0020037];metal ion binding [GO:0046872];peroxidase activity [GO:0004601]	+	20	20	20	62.8	62.8	62.8	33.272	0	139.72	9781200000	133	251760000	250600000	182860000	202280000	1228400000	1281200000	1314900000	1368400000	415830000	478420000	504080000	439180000	122880000	140620000	116500000	135370000	188440000	93535000	202840000
0.433484	1.65084	-0.0391527	-0.736997	1.7852	-0.443908	0.562887	0.927579	-0.863771	-1.11917	-1.49235	-1.1332	0.710727	-0.839987	0.0969376	0.500887		endoplasmic reticulum [GO:0005783]		+	4	2	2	11	5.9	5.9	61.411	1	-2	447480000	5	0	0	18260000	10632000	11339000	0	6169800	0	30226000	32699000	39724000	18590000	26436000	24138000	26771000	29477000	17636000	11431000	13938000
-1.73146	-1.78433	-1.97946	-0.554927	0.627301	0.642563	0.583702	0.715417	0.144608	0.306982	-0.492159	0.470624	0.860417	0.78513	0.772244	0.633346			ATP binding [GO:0005524];protein kinase activity [GO:0004672]	+	2	2	2	3.1	3.1	3.1	76.181	0.0088246	1.5239	431020000	3	6002100	6327000	7531200	0	8938800	7303600	5945100	8620100	0	0	0	0	25121000	29850000	27369000	36361000	12703000	12735000	14738000
-1.84669	-1.22949	-1.48019	-1.11463	1.43978	0.884734	0.723727	-0.0592932	-0.071663	-0.374708	0.245877	-0.139904	0.133937	0.965184	1.3059	0.617429	methylation [GO:0032259]		methyltransferase activity [GO:0008168]	+	10	10	10	18.5	18.5	18.5	51.421	0	21.374	2288400000	47	0	20725000	13233000	23403000	13033000	39044000	31003000	28320000	54319000	74823000	64517000	69963000	156610000	177250000	188720000	140880000	151090000	84433000	146090000
-1.3993	-1.16054	-1.3135	-1.18997	-0.910749	0.555841	0.435859	1.31913	1.00364	0.366431	1.11554	1.12337	-0.717475	1.12031	-0.232298	-0.116285	methylation [GO:0032259]		S-adenosylmethionine-dependent methyltransferase activity [GO:0008757]	+	9	9	9	15.4	15.4	15.4	65.349	0	33.734	2214200000	33	112300000	159390000	125710000	125970000	109990000	120970000	82940000	147540000	54701000	65499000	74274000	52095000	49033000	62350000	83044000	114450000	72224000	37221000	84747000
1.18918	1.65269	1.49082	1.77179	-0.974243	-0.735876	-0.631747	-1.06193	-0.0884264	0.126298	0.127133	0.125184	-0.935227	-0.786312	-0.880663	-0.388683	defense response to fungus, incompatible interaction [GO:0009817];response to abscisic acid [GO:0009737];response to cadmium ion [GO:0046686]	endoplasmic reticulum [GO:0005783];membrane [GO:0016020];plasma membrane [GO:0005886]		+	119	119	119	75.1	75.1	75.1	148.61	0	323.31	37550000000	759	2814700000	3165300000	2346300000	2685600000	2948200000	3554200000	3576600000	3394800000	1483000000	1573100000	1668100000	1493300000	393230000	528040000	476120000	437700000	801770000	533110000	772500000
2.07931	1.05741	1.54257	1.79267	-0.784708	-0.918609	-0.313601	-0.592356	-0.422535	-0.743979	-0.543428	-0.303699	-0.487945	-0.684526	-0.313818	-0.362753			pyridoxal phosphate binding [GO:0030170];transaminase activity [GO:0008483]	+	11	11	11	37.7	37.7	37.7	53.692	0	15.858	1286200000	27	73977000	128270000	32258000	79272000	53314000	91063000	50874000	86686000	155610000	62872000	154400000	173670000	4188500	4569400	13031000	7472800	12024000	4477100	9169600
1.35129	1.6414	1.3241	1.66488	-0.831623	-1.35206	-1.12053	-0.866292	-0.337992	0.0904248	0.294583	0.0878642	-0.71211	-0.464813	-0.0737677	-0.695353		chloroplast [GO:0009507];chloroplast stroma [GO:0009570];cytosol [GO:0005829]		+	17	17	9	56.1	56.1	42.2	32.167	0	289.55	19469000000	228	34002000	36645000	23662000	22928000	11836000	31249000	28402000	45974000	1895400000	1809600000	1810400000	1744200000	818150000	770230000	809410000	608120000	1411700000	1095400000	869410000
1.00214	0.167103	0.833977	1.4114	-0.626992	-1.42428	-0.247047	-0.664554	-1.32307	1.59072	0.659708	1.11416	-0.486755	-0.436057	-1.39274	-0.177718			ATP binding [GO:0005524];metal ion binding [GO:0046872];phosphoprotein phosphatase activity [GO:0004721];protein kinase activity [GO:0004672]	+	2	2	2	2.7	2.7	2.7	121.09	0.0020336	2.1708	1838000000	3	0	7999800	0	0	0	0	0	0	130380000	111040000	168630000	193630000	62758000	76856000	86964000	74579000	118050000	148450000	144950000
-1.90588	-1.82979	-0.480416	-0.336719	0.292036	0.0194151	0.120047	0.234748	-0.427193	-0.796189	0.0554979	0.12737	0.812367	1.53118	0.877843	1.70568				+	4	4	4	20.2	20.2	20.2	27.824	0	44.104	1450300000	40	0	0	0	0	0	0	0	0	54740000	52232000	92926000	48412000	72921000	45839000	87229000	87003000	87406000	54322000	58606000
-0.433657	-1.44172	0.0384719	-0.0917134	-0.429011	-0.715027	0.0298646	0.436315	-1.27476	-1.87696	0.423767	0.832185	0.926514	1.1843	0.605651	1.78578		Golgi apparatus [GO:0005794];integral component of membrane [GO:0016021]	O-acetyltransferase activity [GO:0016413]	+	4	4	4	13.2	13.2	13.2	40.111	0	5.6533	493320000	24	0	0	0	0	0	0	0	0	24850000	17861000	46094000	23609000	6892700	18565000	22873000	42808000	26064000	6886300	41702000
0.0528207	0.381271	0.591112	0.693659	0.211118	0.627267	0.169587	0.267344	0.917698	0.642939	0.676514	1.13801	-1.90899	-1.82077	-1.44544	-1.19413	tricarboxylic acid cycle [GO:0006099]	cytosol [GO:0005829];mitochondrion [GO:0005739];oxoglutarate dehydrogenase complex [GO:0045252]	cobalt ion binding [GO:0050897];oxoglutarate dehydrogenase (succinyl-transferring) activity [GO:0004591];thiamine pyrophosphate binding [GO:0030976];zinc ion binding [GO:0008270]	+	110	110	87	67.4	67.4	57.1	115.16	0	323.31	251700000000	2173	14318000000	16940000000	12543000000	12976000000	20257000000	20135000000	18516000000	19154000000	8038700000	7310100000	9310000000	8094100000	5307500000	6612500000	6769400000	6897800000	8343800000	5414500000	8588000000
1.3129	-0.279178	1.29855	1.4701	-0.0178043	0.963655	0.796451	-0.841906	-0.462318	0.26866	-0.226637	-0.393557	-1.45662	-0.0107506	-0.335302	-2.08624	proteasome assembly [GO:0043248]	plasmodesma [GO:0009506];vacuolar membrane [GO:0005774]		+	9	9	8	21.2	21.2	20.1	60.185	0	15.686	1199500000	31	120580000	134980000	128490000	99407000	214820000	155040000	117900000	146520000	14878000	13927000	15506000	18250000	0	7225700	0	0	3211100	0	3947400
1.60561	1.35332	1.60814	0.657743	-0.497076	-0.0818797	-1.44588	-0.902273	-1.06591	-0.966725	-1.24506	-0.31331	0.718605	0.26211	-0.0174118	0.329982	defense response to bacterium [GO:0042742];endocytosis [GO:0006897];immune response [GO:0006955];innate immune response [GO:0045087];protein transport [GO:0015031];regulation of ARF protein signal transduction [GO:0032012];vesicle-mediated transport [GO:0016192];viral process [GO:0016032]	cytosol [GO:0005829];early endosome [GO:0005769];early endosome membrane [GO:0031901];trans-Golgi network [GO:0005802]	ARF guanyl-nucleotide exchange factor activity [GO:0005086]	+	122	122	118	61.6	61.6	60.6	192.88	0	323.31	67001000000	685	7629200000	8653500000	6387900000	6728900000	8990200000	9363800000	8492800000	9355800000	112660000	123310000	157020000	176070000	50036000	54343000	28472000	15395000	28170000	141300000	47537000
0.927419	1.09787	1.16016	0.702812	-2.76734	-0.369847	-1.07773	-1.10015	-0.0774183	-0.26345	0.604103	0.544609	0.386532	0.0212104	0.20251	0.00871046				+	12	12	12	50.5	50.5	50.5	29.542	0	150.32	4603700000	80	306330000	377470000	290340000	211830000	438350000	529880000	491830000	553720000	131130000	112810000	167220000	83012000	43758000	43836000	36243000	21254000	112220000	72908000	117130000
0.957488	0.503542	1.43563	0.845982	0.454861	0.34678	0.595318	0.223805	-1.89652	-1.55791	-1.55356	-1.24746	0.0561698	0.264802	0.499261	0.0718192	histidyl-tRNA aminoacylation [GO:0006427];mitochondrial translation [GO:0032543]	cytoplasm [GO:0005737];cytosol [GO:0005829];mitochondrion [GO:0005739]	ATP binding [GO:0005524];histidine-tRNA ligase activity [GO:0004821]	+	73	73	73	70.4	70.4	70.4	97.536	0	323.31	38775000000	540	2685400000	2529300000	1927400000	2194500000	5314000000	5134700000	4631300000	4238900000	872210000	853280000	944380000	831370000	475580000	589040000	673290000	687090000	283390000	337400000	404230000
-2.39192	0.0133199	-2.26841	-0.347539	0.657081	0.603576	0.410084	0.653294	-0.115627	-0.21671	-0.269872	0.155084	0.822827	0.675284	0.908174	0.71135		chloroplast [GO:0009507]	ATP binding [GO:0005524];D-alanine-D-alanine ligase activity [GO:0008716];metal ion binding [GO:0046872]	+	7	7	7	7.4	7.4	7.4	102.89	0	3.7216	491000000	12	0	0	0	4435900	0	0	0	18530000	0	26168000	6881900	15388000	32214000	89662000	27463000	30086000	6915000	12991000	5167300
0.501274	-0.81413	0.106778	0.496516	-1.32441	0.752483	-0.0746444	-0.292471	-1.25311	-0.958292	-1.85009	0.18088	1.17774	0.674475	1.18475	1.49225	protein import into nucleus [GO:0006606]	cytoplasm [GO:0005737];cytosol [GO:0005829];nucleus [GO:0005634]	nuclear import signal receptor activity [GO:0061608];nuclear localization sequence binding [GO:0008139];Ran GTPase binding [GO:0008536]	+	41	41	19	49.5	49.5	21.9	96.353	0	323.31	48354000000	311	4333300000	5232600000	4311000000	3737100000	6407800000	6039300000	6301200000	7032900000	269170000	272820000	288190000	238420000	145900000	355080000	228960000	229520000	144770000	154330000	150560000
0.886167	0.900538	0.807564	0.892298	0.19486	0.16212	-1.64629	0.820924	-1.56294	0.150841	-2.3373	0.0904493	-0.0532341	0.0210393	-0.0761319	0.749102				+	5	5	5	14.6	14.6	14.6	43.48	0	7.9091	934900000	27	26375000	43146000	71025000	96686000	35628000	25280000	59655000	48740000	109740000	99796000	62957000	66700000	39271000	18860000	0	25547000	0	40817000	0
-1.3692	-0.973925	-1.2375	-1.55129	-0.14694	-1.03664	0.455382	0.033249	0.0450333	2.02763	0.819721	1.08908	0.250083	0.717602	0.431548	0.446175		chloroplast [GO:0009507]		+	6	6	6	24.8	24.8	24.8	28.261	0	72.807	1256900000	21	0	0	31670000	32495000	0	0	0	0	41714000	70340000	33506000	40657000	110470000	95289000	71893000	97233000	57785000	107770000	42639000
-2.00733	-0.847778	-1.34384	-1.45781	0.722455	1.19209	-0.179808	0.773093	-0.441245	0.181896	-0.123736	-0.180334	0.824148	1.05234	0.90588	0.929993	starch catabolic process [GO:0005983]	chloroplast [GO:0009507];chloroplast starch grain [GO:0009569];chloroplast stroma [GO:0009570];starch grain [GO:0043036]	carbohydrate phosphatase activity [GO:0019203];protein tyrosine/serine/threonine phosphatase activity [GO:0008138]	+	25	25	25	34	34	34	65.74	0	102.74	15298000000	199	659890000	228050000	113060000	225510000	184070000	18986000	138890000	211810000	766730000	742320000	939390000	965280000	700930000	888440000	765490000	816630000	726530000	699810000	780170000
0.781201	1.09812	0.736892	1.07217	-0.827053	0.432782	1.00625	-0.264169	0.43765	-0.271669	-0.150206	0.870973	-2.54028	-0.539974	-1.07757	-0.765107	transcription, DNA-templated [GO:0006351]	cytosol [GO:0005829];nucleus [GO:0005634]	transcription corepressor activity [GO:0003714]	+	11	11	11	20.4	20.4	20.4	68.634	0	12.1	2742800000	55	161530000	184090000	131480000	149260000	178460000	250770000	267630000	335440000	97120000	66000000	96317000	97863000	26349000	57673000	76671000	77336000	91657000	40302000	74122000
-0.998914	0.265251	-1.06103	-1.18042	1.15941	0.110836	1.40437	1.20329	-1.4433	-1.39511	-0.286059	-0.194581	0.112607	0.0838544	1.1509	1.06889	carbohydrate metabolic process [GO:0005975];response to bacterium [GO:0009617]	anchored component of plasma membrane [GO:0046658];apoplast [GO:0048046];cell wall [GO:0005618];endoplasmic reticulum [GO:0005783];secretory vesicle [GO:0099503]	cellulase activity [GO:0008810];glucan endo-1,3-beta-D-glucosidase activity [GO:0042973]	+	20	20	20	78.9	78.9	78.9	37.631	0	323.31	37209000000	259	0	42188000	0	0	76477000	791000000	0	60342000	1931700000	1594500000	1835800000	1540300000	2341600000	3188900000	2551700000	3042700000	1004800000	910640000	1038000000
-2.02132	-1.4942	-0.486035	-1.70694	-0.569076	0.26451	0.883514	0.376334	0.804772	-0.0393085	1.13054	1.08175	0.414449	0.791292	0.565954	0.00376233	folic acid-containing compound biosynthetic process [GO:0009396];one-carbon metabolic process [GO:0006730];photorespiration [GO:0009853];seedling development [GO:0090351];tetrahydrofolylpolyglutamate biosynthetic process [GO:0046901]	cytoplasm [GO:0005737];cytosol [GO:0005829];mitochondrial inner membrane [GO:0005743];mitochondrial matrix [GO:0005759];mitochondrion [GO:0005739]	ATP binding [GO:0005524];metal ion binding [GO:0046872];tetrahydrofolylpolyglutamate synthase activity [GO:0004326]	+	6	6	6	10.6	10.6	10.6	68.92	0	8.9907	1243600000	36	3990100	23151000	12849000	2403100	10576000	0	40431000	26565000	68110000	60627000	78398000	76083000	64061000	44558000	83516000	73159000	63787000	39725000	101000000
-1.19416	-0.892954	-0.473856	-0.490267	-0.139708	-0.390471	1.04407	2.14057	-0.680113	0.985095	-1.01458	-0.857125	0.398244	0.490582	1.60829	-0.533622	carbohydrate metabolic process [GO:0005975]	vacuolar membrane [GO:0005774]	lyase activity [GO:0016829];polygalacturonase activity [GO:0004650]	+	10	10	10	22.7	22.7	22.7	54.098	0	60.305	5868800000	133	189450000	187060000	220540000	179610000	237140000	218280000	162190000	218320000	280440000	335910000	239230000	274560000	264920000	290570000	247120000	366380000	216870000	184820000	168280000
-0.552233	-1.03385	-1.01747	-1.13904	1.28584	1.05582	0.136344	1.07187	-0.176502	-1.70361	-0.262396	-0.203993	0.894764	1.54344	0.800861	-0.699843	peptidyl-diphthamide biosynthetic process from peptidyl-histidine [GO:0017183]		diphthine-ammonia ligase activity [GO:0017178]	+	21	21	21	33.1	33.1	33.1	79.898	0	131.6	10585000000	170	711330000	616650000	554030000	404010000	322320000	280260000	308450000	324560000	150910000	195280000	160960000	186480000	136910000	233140000	157850000	176060000	141190000	182330000	245300000
0.109536	-1.3125	1.33443	0.516795	-0.767859	-1.69681	-0.827631	-1.15976	0.641423	-0.160312	0.266679	0.939719	0.322012	-0.807429	0.994728	1.60697			serine-type carboxypeptidase activity [GO:0004185]	+	8	8	8	21.1	21.1	21.1	45.029	0	17.296	1090200000	20	0	0	0	6889600	0	0	0	0	54570000	31573000	78498000	81373000	46793000	32019000	59778000	54878000	36238000	52917000	82295000
-0.682289	0.404855	-1.13592	-0.729351	0.119334	2.54725	-0.723653	-0.421525	1.49697	0.827006	0.412535	0.430521	-0.173149	-1.11038	-0.677565	-0.584638	tryptophanyl-tRNA aminoacylation [GO:0006436]		ATP binding [GO:0005524];transferase activity [GO:0016740];tryptophan-tRNA ligase activity [GO:0004830]	+	23	23	23	55.7	55.7	55.7	45.767	0	65.668	19292000000	128	322700000	334740000	276990000	285130000	427060000	379670000	316900000	304590000	247660000	263270000	321550000	270080000	294700000	2793600000	323950000	2488200000	445360000	381980000	1836400000
0.797888	0.821755	0.815153	0.809227	-0.613442	-0.227814	-1.83528	-2.10384	0.758019	-1.41673	0.868446	0.870227	0.127683	0.0894511	0.117884	0.121378	intracellular protein transport [GO:0006886]		Ran GTPase binding [GO:0008536]	+	12	12	12	12.2	12.2	12.2	121.35	0	15.052	1593700000	30	106700000	141810000	100610000	87158000	188110000	176780000	171130000	164340000	38976000	37529000	43136000	38895000	1145800	0	0	0	34551000	0	44793000
-1.3181	-0.379698	-1.55495	-0.566697	-0.409356	-1.08759	1.2169	1.01587	0.347561	1.20585	1.45817	0.860642	-0.779319	-0.062994	-0.82801	0.881718	regulation of phosphoprotein phosphatase activity [GO:0043666]		protein phosphatase binding [GO:0019903];protein phosphatase regulator activity [GO:0019888]	+	30	30	28	45.9	45.9	44.6	87.639	0	248.97	12859000000	150	1251900000	1625800000	1222900000	1275800000	1805800000	2011000000	1606800000	1736100000	2698900	30908000	8863100	15544000	0	0	74682000	36371000	5599300	22930000	36516000
0.30769	0.345721	-0.952439	-1.23174	-2.70855	-1.04644	0.010446	0.445673	0.539228	1.1332	0.686903	0.916647	0.596117	0.270428	0.0436094	0.643508	DNA-dependent DNA replication [GO:0006261]		DNA binding [GO:0003677];DNA-directed DNA polymerase activity [GO:0003887];exonuclease activity [GO:0004527]	+	3	3	3	11.4	11.4	11.4	45.537	0	4.185	203390000	8	0	0	0	0	3311700	0	15985000	10556000	22849000	14388000	0	0	0	0	0	10419000	13288000	30354000	18702000
-1.7305	-1.88963	-0.495388	-0.65623	0.0107781	-0.409651	0.172268	-0.112306	0.0727309	-0.490072	0.103999	0.123581	1.13975	1.08048	1.35759	1.72259	intracellular distribution of mitochondria [GO:0048312];positive regulation of mitochondrial fusion [GO:0010636]	cytosol [GO:0005829];plasma membrane [GO:0005886]	RNA binding [GO:0003723]	+	79	79	79	56.4	56.4	56.4	155.17	0	323.31	46630000000	717	4523300000	4856300000	3850800000	3604200000	5603400000	5929100000	5511500000	5839800000	252020000	226970000	419010000	376150000	353450000	218830000	431050000	315030000	356190000	220090000	462050000
0.812344	0.967289	0.465178	0.120173	0.374493	0.686576	0.0433142	0.660904	0.624745	0.955736	0.110331	0.544761	-1.12759	-1.92101	-1.50558	-1.81167	formation of cytoplasmic translation initiation complex [GO:0001732]	cytosol [GO:0005829];eukaryotic 43S preinitiation complex [GO:0016282];eukaryotic 48S preinitiation complex [GO:0033290];eukaryotic translation initiation factor 3 complex [GO:0005852];plasma membrane [GO:0005886]	mRNA binding [GO:0003729];translation initiation factor activity [GO:0003743]	+	23	23	23	60.1	60.1	60.1	35.663	0	198.61	18417000000	185	1217900000	1489500000	1052700000	1134000000	2030400000	2597600000	2318200000	2100100000	386810000	395290000	436350000	276190000	221990000	256090000	230390000	369090000	404880000	267910000	271290000
-1.62835	-2.01509	-0.876003	-0.413659	0.220629	0.164351	1.03584	-0.725275	0.814428	1.416	1.23654	0.884141	0.0117964	0.629453	-0.462394	-0.2924	chromatin silencing [GO:0006342];embryo development ending in seed dormancy [GO:0009793];leaf development [GO:0048366];regulation of flower development [GO:0009909];shoot apical meristem development [GO:1902182]	cytosol [GO:0005829]	DNA binding [GO:0003677]	+	35	35	25	44.5	44.5	35.7	73.989	0	76.659	12102000000	285	340060000	219720000	215490000	161340000	599930000	475390000	545360000	569900000	547590000	370880000	492120000	491880000	399660000	502140000	650980000	571260000	703220000	508210000	776110000
-0.0365929	1.0449	0.590972	0.351599	0.447426	0.38342	0.106067	-0.557191	-2.18927	-0.357322	-1.10928	-1.40635	1.01719	-0.65467	1.61266	0.756439	protein import into nucleus [GO:0006606]	cytosol [GO:0005829];nuclear envelope [GO:0005635]	Ran GTPase binding [GO:0008536]	+	44	44	41	38.2	38.2	38.1	117.77	0	323.31	25860000000	315	2748000000	3139700000	2229800000	2642900000	3191300000	3316000000	2784900000	3090100000	203900000	278210000	300040000	221390000	146290000	169270000	132220000	134030000	95516000	93267000	86468000
1.00664	0.973087	0.92582	1.33286	0.351906	-0.476388	0.126895	0.0815746	0.335351	0.821867	-0.449996	-0.560774	-1.29426	-2.56053	-0.699293	0.0852433	protein deubiquitination [GO:0016579];ubiquitin-dependent protein catabolic process [GO:0006511]		thiol-dependent ubiquitinyl hydrolase activity [GO:0036459]	+	99	47	47	70.6	40	40	130.52	0	253.81	22534000000	310	2364300000	2667500000	1963600000	1860300000	3128300000	2823000000	2554600000	2555700000	276140000	184710000	238100000	213550000	110470000	104660000	130580000	145910000	164960000	119100000	136960000
0.431525	2.28292	1.18715	0.921756	-1.28495	-0.720963	-1.51855	-0.502035	0.364369	0.0121126	0.561191	0.737592	-0.46835	-0.661216	-0.491707	-0.850848			hydrolase activity [GO:0016787]	+	8	8	8	42.2	42.2	42.2	21.457	0	71.901	3521300000	64	115170000	73137000	38802000	46059000	200460000	637160000	177430000	164610000	144430000	232490000	236720000	233170000	70283000	86851000	63420000	112950000	124100000	118520000	136300000
0.342212	0.281727	0.464881	0.630702	0.694452	0.549664	0.603158	0.793145	-2.02595	-1.18872	-1.84043	-1.50506	0.530305	0.701742	0.479952	0.488232	glutamine biosynthetic process [GO:0006542];lateral root formation [GO:0010311];polyamine catabolic process [GO:0006598];response to abscisic acid [GO:0009737];response to bacterium [GO:0009617];root cap development [GO:0048829]	cytosol [GO:0005829]	gamma-tubulin binding [GO:0043015];hydrolase activity [GO:0016787];protein self-association [GO:0043621];transcription factor binding [GO:0008134]	+	53	53	53	54.7	54.7	54.7	94.384	0	323.31	32449000000	434	2831800000	2785100000	2178900000	2518800000	4265200000	3969800000	3561300000	3749800000	536810000	561340000	531950000	436590000	389790000	520370000	428830000	373350000	217660000	258520000	215290000
1.58441	1.75637	1.6299	1.34535	-0.772856	-0.697793	-0.841162	-0.176143	-0.700076	-0.538399	0.164729	0.0357819	-0.940196	-0.537175	-0.286987	-1.02576		cytosol [GO:0005829]		+	51	51	51	77.3	77.3	77.3	73.453	0	257.23	12909000000	195	2620900000	1221800000	1112100000	1103800000	1130100000	1434600000	1240700000	1263300000	333130000	434050000	403110000	276600000	36569000	25391000	16440000	38429000	32582000	24246000	42949000
-0.654286	-0.957483	-0.999642	-1.76754	-1.70446	0.408299	-0.391116	1.43376	0.698281	0.48493	0.467572	0.450311	0.139734	0.299949	0.409497	1.6822			metal ion binding [GO:0046872];oxidoreductase activity [GO:0016491]	+	12	12	12	60.1	60.1	60.1	31.676	0	24.859	2348300000	52	20765000	97588000	64229000	51739000	95755000	98353000	89172000	92831000	78020000	89380000	85743000	50531000	23518000	79052000	75699000	124520000	153520000	66124000	149060000
-0.128201	-2.54483	-0.0930325	-2.26422	0.418279	-0.143901	0.282661	0.572999	0.7417	0.683931	0.834689	0.758487	-0.164221	0.181497	0.582037	0.282129			aspartic-type endopeptidase activity [GO:0004190]	+	2	2	2	6.6	6.6	6.6	38.316	0	5.9005	590380000	4	10832000	10975000	177480000	11846000	16921000	5094500	0	14867000	6739300	0	12405000	0	13896000	8991300	10671000	35929000	43244000	17951000	41776000
-1.76649	-0.492949	-0.78817	0.260483	0.712305	0.437851	1.11161	-0.648014	-0.178282	-1.89847	-0.4097	-0.408375	1.18068	0.433258	1.10721	1.34705	carbohydrate metabolic process [GO:0005975]		hydrolase activity, hydrolyzing O-glycosyl compounds [GO:0004553]	+	16	7	7	24.8	11.5	11.5	66.098	0	13.528	1012000000	32	43406000	26070000	19830000	25238000	23256000	12258000	10615000	19073000	26126000	41018000	40808000	31752000	56622000	45639000	57650000	42791000	41025000	23019000	36152000
-0.934105	0.827966	1.1478	0.944705	-1.16945	-1.53292	-0.849271	-0.967297	1.21908	-1.0749	-0.530354	0.979814	-0.361225	0.997226	0.673792	0.629137	translational elongation [GO:0006414]	cytosol [GO:0005829];ribonucleoprotein complex [GO:1990904];ribosome [GO:0005840]	GTP binding [GO:0005525];GTPase activity [GO:0003924];ribosome binding [GO:0043022];translation elongation factor activity [GO:0003746]	+	45	6	6	46.6	10.2	10.2	90.994	0	28.492	9201900000	18	33281000	1622900000	45235000	28644000	84328000	2251300000	1916100000	61486000	12450000	8369300	37836000	12645000	0	67706000	0	8741800	32937000	8482100	67811000
-0.970676	-0.291711	-1.41818	-0.500907	0.833283	1.09217	0.954871	1.17532	-1.78017	1.08963	-0.381685	-0.757621	0.589196	-0.354784	1.28829	-0.567025		chloroplast [GO:0009507]		+	12	12	12	52.9	52.9	52.9	32.336	0	134.06	14313000000	179	414440000	445120000	265840000	347520000	583510000	488640000	409290000	463080000	757220000	662670000	776020000	771190000	488430000	600420000	579740000	641140000	629660000	504550000	694340000
0.87627	0.76986	1.27588	0.964612	-1.7636	-0.146428	0.516808	-1.22584	-0.291684	-0.223261	-2.30293	0.216883	0.0695804	0.0978888	0.583265	0.582698			3-hydroxyisobutyryl-CoA hydrolase activity [GO:0003860];peptidase activity [GO:0008233]	+	6	6	6	19.7	19.7	19.7	47.43	0	13.29	598460000	18	0	0	0	0	17067000	9354000	0	9318400	91975000	62006000	118710000	58062000	9474000	20581000	11774000	6981800	23107000	11269000	0
0.163317	-0.392942	0.85449	-0.46197	-0.179831	-0.15929	0.265963	0.0283369	-1.8638	-0.423428	-2.28798	0.13236	1.32475	0.810605	0.968498	1.22092	arabinogalactan protein metabolic process [GO:0010405];carbohydrate metabolic process [GO:0005975]	cell wall [GO:0005618]	hydrolase activity, hydrolyzing O-glycosyl compounds [GO:0004553];polysaccharide binding [GO:0030247];raffinose alpha-galactosidase activity [GO:0052692]	+	12	12	12	16.2	16.2	16.2	72.342	0	20.702	3382400000	98	6545200	8835500	24517000	13056000	7725400	31694000	15130000	7784400	191750000	224910000	273080000	237860000	164980000	141280000	142040000	150930000	147480000	124110000	110510000
0.601833	0.560571	0.592379	0.611223	-1.26944	-1.62735	0.62	0.606628	0.581908	0.616519	0.88186	0.922214	0.525867	-1.31321	-1.42375	-1.48726	protein deubiquitination [GO:0016579]		thiol-dependent ubiquitinyl hydrolase activity [GO:0036459]	+	3	2	2	2	1.1	1.1	177.39	0.0033009	2.0412	6928000000	3	29841000	38876000	4298000	28273000	9853200	11759000	7940700	9498200	677970000	528180000	696050000	683680000	0	0	611950000	588060000	609150000	498250000	639060000
0.572543	0.80237	0.468037	-0.129147	1.22413	0.76971	0.448118	-1.25708	-0.782412	0.955876	0.187735	0.928502	-1.08647	-2.47282	-0.360917	-0.268179	miRNA mediated inhibition of translation [GO:0035278]	nucleus [GO:0005634];P-body [GO:0000932]	chromatin binding [GO:0003682]	+	7	7	7	7.7	7.7	7.7	171.94	0	11.504	910140000	17	66566000	59069000	34279000	69671000	97080000	122560000	124140000	131250000	20661000	21814000	16437000	1184700	74046000	13568000	16123000	0	0	15100000	5886000
0.726915	-0.959325	0.7853	0.591323	0.702726	-1.87006	-1.53598	-1.33101	0.804998	0.781691	0.587135	0.634999	0.447096	0.487515	-1.33619	0.48287			phosphatidylinositol binding [GO:0035091]	+	1	1	1	1.3	1.3	1.3	103.59	0.0023981	2.1376	11854000000	7	0	0	0	0	3629100	0	0	0	1063500000	0	1334200000	1255100000	701530000	0	0	0	1287400000	861890000	1239000000
-0.317185	0.839109	-0.590389	-0.148969	1.64635	1.34906	0.0172163	1.03696	-1.81242	-0.202875	-1.83898	-0.603448	0.0924614	-0.179671	-0.296148	1.00894		secretory vesicle [GO:0099503];vacuole [GO:0005773]		+	5	4	4	16.6	12.5	12.5	30.322	0	6.5578	1037200000	26	0	0	0	0	0	14194000	0	16339000	66833000	60860000	57744000	66182000	70390000	87048000	35759000	78015000	26282000	49802000	37077000
-0.0151621	0.685228	-1.10292	0.915147	0.299654	1.66278	2.01618	0.630214	-0.433831	-1.40302	-0.965532	-1.23795	-0.607558	-0.0145612	-0.410384	-0.018287			hydrolase activity [GO:0016787]	+	16	16	16	71.3	71.3	71.3	31.512	0	196.04	7928100000	158	55367000	104690000	90622000	61746000	69674000	114540000	66193000	93337000	539230000	566600000	432210000	407330000	334930000	426780000	507520000	460170000	435490000	265970000	487490000
0.526369	1.05005	1.01243	0.745358	-0.524388	-0.534114	-0.18937	0.00266425	0.776548	0.633056	1.04291	1.09373	-1.46801	-1.69111	-1.04384	-1.43228			ATP binding [GO:0005524];helicase activity [GO:0004386];translation initiation factor activity [GO:0003743]	+	52	52	12	82.3	82.3	32.4	46.136	0	323.31	265300000000	1226	22058000000	22671000000	19992000000	20511000000	30779000000	30969000000	27973000000	30351000000	4463400000	4492400000	5126000000	4774700000	2534700000	2724300000	3017600000	3106500000	4301700000	3107900000	4958500000
-0.263286	0.430004	-0.328245	0.354205	-0.382896	0.477585	0.699536	0.695758	-1.15196	-1.06872	-1.81146	-1.63745	0.49036	0.866562	0.938967	1.69104				+	10	10	10	31.4	31.4	31.4	44.659	0	39.892	1873900000	51	177260000	162430000	144860000	166640000	190740000	226450000	181770000	203810000	27899000	22262000	20849000	27295000	8178500	27985000	47087000	25693000	22086000	9181900	5846700
0.364507	-0.685513	0.249931	1.12268	0.731537	-0.176185	1.3135	0.809055	-0.612123	0.553336	0.906644	-0.19638	-1.87516	-0.766887	-2.08819	0.349252	activation of GTPase activity [GO:0090630];intracellular protein transport [GO:0006886]	cytosol [GO:0005829]	GTPase activator activity [GO:0005096];Rab GTPase binding [GO:0017137]	+	18	18	18	24.4	24.4	24.4	91.753	0	48.433	4197500000	52	523390000	509640000	403100000	361380000	683000000	600880000	447320000	485620000	18495000	5209000	19356000	23953000	12575000	13558000	5002000	37184000	10131000	9155500	8970100
-1.82056	-1.37113	-1.01889	0.109669	-1.6388	0.438073	0.605024	0.952776	0.652276	-1.06988	0.740017	0.659318	0.516896	0.595702	0.638878	1.01063	regulation of RNA metabolic process [GO:0051252]	nucleus [GO:0005634];ribonucleoprotein complex [GO:1990904]	mRNA binding [GO:0003729];RNA binding [GO:0003723]	+	7	6	6	19.8	18.6	18.6	52.055	0	20.697	1924000000	17	44077000	154860000	106640000	173670000	295360000	326690000	309670000	333330000	0	0	1651200	16588000	0	9468100	11487000	19641000	14630000	0	16443000
-0.716765	-0.170843	-2.36527	-2.20903	0.165834	0.354047	0.694713	0.692264	0.906493	0.96427	0.660894	0.658073	-0.283193	0.342112	0.188358	0.118045		integral component of membrane [GO:0016021]	ATP binding [GO:0005524];protein kinase activity [GO:0004672]	+	4	4	4	9.8	9.8	9.8	64.011	0	9.1341	333450000	16	0	0	0	0	0	0	0	0	0	9240600	0	0	22651000	42231000	12661000	25104000	38966000	30277000	33871000
-0.351403	-0.324943	-0.130929	-2.13658	1.07618	1.0776	0.596196	0.633818	-1.02171	-0.625578	-1.03524	-1.23462	0.693816	1.03482	0.874359	0.874223	embryo development ending in seed dormancy [GO:0009793];fructose 6-phosphate metabolic process [GO:0006002];photosynthesis [GO:0015979];response to glucose [GO:0009749]	cytosol [GO:0005829]	6-phosphofructokinase activity [GO:0003872];ATP binding [GO:0005524];diphosphate-fructose-6-phosphate 1-phosphotransferase activity [GO:0047334];metal ion binding [GO:0046872];phosphofructokinase activity [GO:0008443]	+	30	13	13	43.8	27.2	27.2	62.741	0	46.116	4432200000	92	68617000	74511000	72154000	67867000	209880000	208070000	193180000	154920000	182940000	156810000	178350000	134420000	199390000	263810000	200280000	254550000	111660000	140140000	152670000
1.40041	-0.111737	1.46527	1.57342	0.760533	0.192873	0.386323	-0.0932105	-1.48949	-1.35465	-1.0694	-1.20599	-0.434223	0.621753	-0.00681432	-0.635071	acyl-CoA metabolic process [GO:0006637];fatty acid catabolic process [GO:0009062]		acyl-CoA hydrolase activity [GO:0047617]	+	6	6	6	15.5	15.5	15.5	49.85	0	11.131	1230100000	53	12728000	32505000	22364000	19263000	32884000	20208000	11333000	22600000	95969000	37951000	92365000	115290000	41823000	77123000	39271000	49263000	65090000	22380000	50586000
-0.790776	0.679639	-0.610349	-0.109122	-0.468279	0.267808	-0.969506	1.26831	1.34546	1.06449	1.18712	0.696952	-1.24797	-1.78744	0.42945	-0.955793				+	4	4	4	15.4	15.4	15.4	36.643	0	4.121	959830000	18	18760000	38793000	54374000	15486000	50420000	62730000	53381000	57382000	24555000	50811000	27313000	31274000	17882000	32979000	43131000	32800000	33114000	25436000	31082000
0.687195	2.09038	1.54822	1.31218	-0.558826	-0.355645	-1.09865	-0.597262	-0.00529756	-0.297004	0.317755	-0.0258408	-1.36309	-1.13934	-0.785714	0.270929				+	28	28	28	55.4	55.4	55.4	25.341	0	323.31	75210000000	509	5197500000	5470700000	2874100000	3545500000	6405800000	5937200000	6037900000	6059700000	2500400000	2331600000	2974100000	2447300000	1247400000	1661200000	1617800000	1615600000	2431100000	1465900000	2411500000
-1.21145	-0.555761	0.817012	0.397155	-0.805415	-0.494877	-0.141548	0.345524	-1.35599	-1.21145	-0.673159	-0.319243	0.69216	1.40818	1.23094	1.87792		chloroplast [GO:0009507]	catalytic activity [GO:0003824]	+	40	40	40	52.7	52.7	52.7	91.834	0	287.22	22738000000	360	465360000	518860000	350690000	310340000	309300000	409230000	320410000	341130000	1119400000	1074300000	1246000000	1400000000	1360600000	970460000	1053700000	1019800000	1025800000	1196600000	1102600000
0.149756	0.112319	-0.82663	-1.34043	0.97732	0.425986	0.543342	1.44395	-0.570633	-1.9579	0.667716	-1.36055	0.722306	-0.709622	0.895647	0.827431	DNA catabolic process [GO:0006308];RNA phosphodiester bond hydrolysis, endonucleolytic [GO:0090502]		endonuclease activity [GO:0004519];endoribonuclease activity [GO:0004521];metal ion binding [GO:0046872];nucleic acid binding [GO:0003676];single-stranded DNA endodeoxyribonuclease activity [GO:0000014]	+	5	3	3	20.1	15.4	15.4	34.203	0	4.6509	1022400000	19	21461000	19192000	21264000	14326000	71147000	25267000	21203000	27526000	35870000	41127000	45220000	39501000	39057000	30864000	32747000	39864000	47419000	36785000	72447000
-0.813718	-1.49429	-0.088573	-1.2451	-0.732778	-0.574436	-0.318876	-0.785499	0.657377	0.819412	-0.742255	0.0786977	0.770354	1.31314	1.59861	1.55794				+	4	4	4	30.6	30.6	30.6	10.048	0	7.1951	216530000	15	0	0	0	0	0	0	0	0	5142300	7955200	18696000	19544000	13146000	4677900	5463300	17473000	13173000	8278300	9827200
0.44601	0.364786	0.754403	0.865574	0.117481	1.35354	0.64168	-0.317199	0.578522	0.491815	0.462073	0.462905	-2.00032	-1.23916	-1.44768	-1.53444		cytosol [GO:0005829];extracellular space [GO:0005615]	serine-type endopeptidase activity [GO:0004252]	+	8	2	2	11	2.9	2.9	81.478	1	-2	384870000	16	7710000	7087200	0	0	26153000	16676000	13139000	10654000	27717000	17642000	23628000	22459000	12505000	22312000	17955000	12929000	29867000	14049000	19619000
0.937207	1.34812	1.37532	1.69492	-1.40541	-1.12722	-0.79375	-0.681746	-1.59505	-0.381999	-0.191826	0.0827308	-0.103531	-0.0829229	0.36249	0.562671	intracellular protein transport [GO:0006886]			+	17	17	8	60.7	60.7	28.7	32.108	0	133.83	7381300000	94	642580000	658260000	662100000	522240000	631130000	745560000	677390000	662100000	143190000	171440000	251100000	282240000	61930000	70078000	102730000	99902000	97613000	92922000	136080000
-2.24701	-0.633444	-1.2003	-0.633675	-0.221272	-0.0403014	1.37725	0.558497	1.68437	-0.734535	0.651791	-0.576981	0.591993	0.254314	0.256802	0.9125	tRNA aminoacylation for protein translation [GO:0006418]	chloroplast [GO:0009507];cytosol [GO:0005829];mitochondrion [GO:0005739]	aspartate-tRNA ligase activity [GO:0004815];ATP binding [GO:0005524];DNA binding [GO:0003677];metal ion binding [GO:0046872]	+	28	28	28	44	44	44	74.516	0	84.518	13209000000	248	102240000	128650000	72899000	76780000	141590000	214070000	50497000	131090000	649880000	777070000	853500000	757760000	658120000	758190000	777520000	793320000	725700000	451730000	870070000
0.331151	0.259751	0.279955	-0.110769	1.68034	1.93636	1.12442	-0.17388	-0.10908	-0.682561	0.255884	-0.136023	-1.48409	-0.826952	-0.594274	-1.75023		chloroplast [GO:0009507];chloroplast stroma [GO:0009570]		+	11	11	11	33.3	33.3	33.3	43.963	0	24.381	3521800000	51	16302000	38724000	28728000	12701000	28667000	4501200	27618000	45470000	332350000	224980000	212370000	222090000	155430000	331160000	220320000	228330000	208720000	149290000	286430000
-1.72185	-0.169268	-0.664319	-0.295277	1.58642	1.34002	-0.248993	0.679016	-0.537849	0.689633	-0.246456	-2.12101	0.849233	0.0252442	0.769508	0.0659487		cytosol [GO:0005829]	2,3-bisphosphoglycerate-independent phosphoglycerate mutase activity [GO:0046537];metal ion binding [GO:0046872]	+	18	18	11	39.4	39.4	25	53.124	0	102.27	4278800000	144	512250000	537470000	320300000	446020000	279190000	421450000	369770000	379800000	37386000	39533000	53693000	55505000	82199000	82997000	40708000	72156000	45954000	49457000	52356000
-1.40168	-1.3143	-2.07387	-1.4622	0.512566	0.0221284	0.0374577	0.42764	0.778228	1.07795	1.11367	0.892042	0.500033	0.18683	0.145138	0.558379	cell cycle [GO:0007049];multicellular organism development [GO:0007275];response to abscisic acid [GO:0009737]	cytoplasm [GO:0005737];plasma membrane [GO:0005886]		+	85	85	79	44.3	44.3	40.6	199.11	0	323.31	35992000000	559	100170000	44077000	26253000	66358000	66529000	85854000	47819000	60643000	570510000	454880000	635380000	471440000	1672500000	1875900000	1961800000	2043600000	4382500000	3000300000	4441700000
-0.699573	-0.72197	0.0277599	0.140316	0.226901	0.299397	1.17453	0.323805	-1.24819	-1.47148	-1.42684	-1.16236	1.09709	1.12441	1.36174	0.95445		chloroplast [GO:0009507];chloroplast stroma [GO:0009570];cytosol [GO:0005829]		+	21	21	21	54.7	54.7	54.7	32.725	0	209.43	20562000000	234	150320000	137320000	69022000	107080000	209120000	140730000	97899000	145030000	1285900000	1141900000	1192000000	814430000	1146300000	1268200000	1239300000	1187000000	994940000	611800000	879580000
1.12336	1.65152	1.39479	1.11523	-0.966212	-1.56967	-0.788588	-1.36877	0.812671	-0.272245	0.48689	0.186764	-0.625826	-0.533153	-0.459352	-0.187404	NLS-bearing protein import into nucleus [GO:0006607]	cytosol [GO:0005829];host cell nucleus [GO:0042025];nuclear envelope [GO:0005635];nucleolus [GO:0005730];nucleus [GO:0005634];plasmodesma [GO:0009506]	nuclear import signal receptor activity [GO:0061608];nuclear localization sequence binding [GO:0008139]	+	41	24	24	79.3	61.9	61.9	58.906	0	323.31	32345000000	428	2084800000	2142200000	1542700000	1595100000	2706800000	2992800000	2525900000	2728500000	1113900000	1199900000	1321700000	1081000000	492320000	624780000	620320000	647270000	1008400000	610180000	1007400000
0.912253	1.16083	1.13172	1.03556	-0.937409	-0.979998	-0.307023	-1.26772	0.977252	0.916485	0.883817	0.41523	-1.32959	-1.12481	-0.884857	-0.601743				+	6	6	6	12.8	12.8	12.8	47.993	0	5.7697	1135000000	42	118970000	36895000	52682000	53155000	149950000	130440000	118150000	139680000	22863000	37251000	19853000	41487000	35410000	17568000	8377000	12762000	36282000	12524000	27613000
1.34655	0.767219	1.5154	0.846536	-0.0853401	-0.994145	-0.190208	-0.674172	0.546153	0.0685941	1.04369	0.603695	-1.545	-0.700099	-1.60349	-0.945385	cell redox homeostasis [GO:0045454];oxidation-reduction process [GO:0055114];response to arsenic-containing substance [GO:0046685]	chloroplast [GO:0009507];chloroplast envelope [GO:0009941];chloroplast stroma [GO:0009570];cytosol [GO:0005829]	dihydrolipoyl dehydrogenase activity [GO:0004148];flavin adenine dinucleotide binding [GO:0050660]	+	50	50	28	73.7	73.7	47.1	60.144	0	323.31	88718000000	1028	4203400000	4377400000	3550500000	3290300000	4882900000	4811500000	4619800000	4798300000	4303300000	3840900000	4593900000	4091700000	2434800000	2938600000	2814100000	2648700000	3912400000	2600300000	3685400000
-1.72614	-1.30805	-0.933619	-1.42546	0.967072	0.567386	0.546275	0.180623	-0.170976	-0.508276	-0.60331	0.0945229	0.962618	0.559303	1.35845	1.43957		peroxisome [GO:0005777]	dioxygenase activity [GO:0051213];metal ion binding [GO:0046872]	+	7	7	7	21.2	21.2	21.2	40.376	0	46.529	2830100000	58	156100000	129310000	78423000	119330000	196080000	152230000	128240000	150480000	65596000	53684000	63322000	59261000	99644000	102470000	139760000	117900000	92874000	66202000	90716000
1.07875	0.776272	0.733775	0.728428	-3.36593	-0.0944015	-0.07724	-0.37481	0.216419	-0.285241	0.459397	-0.184289	0.0589888	0.115207	0.472577	-0.257902		chloroplast [GO:0009507];cytosol [GO:0005829]	kinase activity [GO:0016301];phosphotransferase activity, alcohol group as acceptor [GO:0016773]	+	27	2	2	57.5	5	5	47.353	0	6.8381	422320000	15	0	12843000	0	0	0	0	0	0	58096000	22295000	52663000	25108000	0	15500000	28907000	25444000	19442000	10052000	41456000
-0.801763	-0.801193	-1.03049	-1.41076	0.384417	0.501891	-0.0128304	0.65584	-0.930344	-0.251919	-0.666273	-1.00822	1.7405	1.27601	1.09746	1.25768			dioxygenase activity [GO:0051213]	+	7	7	7	24.4	24.4	24.4	29.08	0	26.402	3273100000	79	69228000	62593000	38988000	59989000	40542000	66547000	64491000	47201000	142170000	77570000	198900000	124170000	122230000	160120000	154390000	166190000	147970000	93087000	142680000
1.29878	1.63536	1.56179	1.51301	-0.418885	-0.289989	-0.634225	-0.300426	-0.382476	-0.67337	0.328054	0.234297	-1.18342	-1.08944	-1.31443	-0.28462	defense response to bacterium, incompatible interaction [GO:0009816];post-embryonic development [GO:0009791];protein folding [GO:0006457];protein targeting to chloroplast [GO:0045036];response to cadmium ion [GO:0046686];vegetative to reproductive phase transition of meristem [GO:0010228]	chloroplast [GO:0009507];cytoplasm [GO:0005737];integral component of chloroplast outer membrane [GO:0031359];nucleus [GO:0005634];plasma membrane [GO:0005886]		+	27	27	23	76.9	76.9	66.9	38.056	0	323.31	31905000000	394	179360000	214860000	122500000	147890000	353390000	327020000	339110000	352180000	2508100000	2438000000	2833700000	2464400000	1233700000	1569500000	1569100000	1598900000	1914100000	1122200000	2028100000
-1.29273	-0.886435	-1.34468	-1.29446	-0.240856	0.0115554	-0.0402462	0.180183	1.16878	1.43096	1.60556	1.62593	-0.371648	-0.294853	0.0635343	-0.320604		cytosol [GO:0005829]	endoribonuclease activity [GO:0004521]	+	20	20	20	68.2	68.2	68.2	35.951	0	323.31	18600000000	257	1528200000	1521100000	1064100000	1208100000	1465700000	1842200000	1515200000	1769900000	280320000	309590000	364060000	296700000	217090000	225350000	337130000	345480000	691770000	430700000	774020000
-2.58181	-1.53358	-1.3774	-0.443415	0.127323	0.112582	0.363775	0.533108	0.339954	0.61999	0.799456	1.0709	0.177694	0.739152	0.639388	0.412884		integral component of membrane [GO:0016021]	ATP binding [GO:0005524];protein kinase activity [GO:0004672]	+	3	3	3	6.2	6.2	6.2	72	0	6.1666	376040000	14	15360000	16564000	0	0	22275000	43665000	25740000	24722000	0	0	0	0	8636300	9826300	12449000	14425000	28193000	12616000	31917000
0.896746	1.25645	1.25996	1.03573	-0.503281	-1.18487	-0.205487	-0.356188	-0.401261	-0.511794	-1.16861	1.24579	1.16087	-0.638324	-0.150076	-1.73564	vesicle-mediated transport [GO:0016192]	cytosol [GO:0005829];nucleus [GO:0005634]		+	8	8	8	19.5	19.5	19.5	62.349	0	25.238	1205000000	15	118380000	132820000	93758000	124210000	122210000	148920000	129160000	125380000	32506000	50888000	70828000	41061000	0	0	0	0	0	0	0
-1.11721	-0.464239	-1.21	-1.37339	-0.0332789	0.561308	0.143932	1.13392	-0.40173	-1.13323	-0.565443	-0.506319	0.971084	0.901827	1.50912	1.58364	carbohydrate metabolic process [GO:0005975]	chloroplast [GO:0009507];cytosol [GO:0005829];plasma membrane [GO:0005886]	kinase activity [GO:0016301];phosphotransferase activity, alcohol group as acceptor [GO:0016773]	+	37	37	37	64.6	64.6	64.6	62.551	0	323.31	33735000000	487	591360000	564890000	401550000	372810000	568880000	490640000	491540000	540240000	1796800000	1655100000	1875300000	1407900000	1363600000	1839300000	1717600000	1713100000	1804300000	1295500000	1884200000
-0.820889	-0.784856	0.437074	-0.606061	-1.13193	0.314005	-0.306246	-0.728196	1.57559	1.43538	1.24685	1.24298	-0.90564	-0.931374	-0.971533	0.934843	photosynthesis [GO:0015979]	chloroplast [GO:0009507];plasma membrane [GO:0005886]		+	24	24	24	37.6	37.6	37.6	77.089	0	105.39	4507200000	151	6908900	0	0	0	0	0	94765000	5760000	288580000	268190000	366800000	329150000	208280000	197680000	197940000	232980000	342040000	208770000	341710000
-0.791214	-0.648407	-1.10004	-0.693659	-0.852221	1.66009	0.64965	1.2248	-0.977823	-0.674672	-1.00896	-0.541613	0.399413	0.748936	1.20304	1.40268	lipid metabolic process [GO:0006629]	plasma membrane [GO:0005886]	phosphoric diester hydrolase activity [GO:0008081]	+	13	13	13	24.8	24.8	24.8	44.331	0	113.28	9523900000	158	90244000	113660000	66544000	115540000	131050000	124440000	88899000	134180000	660040000	545380000	644890000	530810000	321860000	528090000	436380000	549200000	503360000	263000000	474170000
1.37427	1.29705	1.37246	0.0352896	0.223909	0.0684186	-0.281946	0.401506	0.42356	-1.07443	-1.67724	-1.34234	0.351986	-1.7366	0.259297	0.304821	mitochondrial respiratory chain complex I assembly [GO:0032981];NADH dehydrogenase complex assembly [GO:0010257]	chloroplast [GO:0009507];chloroplast stroma [GO:0009570];cytosol [GO:0005829];vacuole [GO:0005773]	unfolded protein binding [GO:0051082]	+	51	51	51	60.4	60.4	60.4	69.137	0	323.31	111410000000	662	149970000	33533000	60684000	12578000	160950000	54517000	51710000	65816000	9132900000	9466700000	10058000000	9293800000	4680600000	5119300000	5680200000	5369000000	7316600000	4998700000	6799600000
-0.288736	-0.434111	-1.83443	-0.397746	-0.236031	1.46666	-1.303	1.38554	0.170587	1.31659	0.737591	1.27267	0.0774858	-0.412728	-1.00736	-0.512986	Golgi organization [GO:0007030];intra-Golgi vesicle-mediated transport [GO:0006891];protein transport [GO:0015031];regulation of exocyst localization [GO:0060178]	cytoplasmic vesicle [GO:0031410];Golgi membrane [GO:0000139];Golgi transport complex [GO:0017119];vacuole [GO:0005773]	protein homodimerization activity [GO:0042803]	+	24	24	24	34.3	34.3	34.3	84.618	0	182.34	3016800000	88	300050000	318940000	233620000	250050000	353920000	502110000	447210000	415380000	5341300	0	0	0	0	10673000	0	10194000	39717000	29052000	46439000
1.46998	1.45213	0.622325	1.49156	0.377198	0.0157361	-0.87819	-1.69303	-0.470026	-0.223848	0.420115	-1.39967	-1.1708	-0.485314	-0.0912844	0.563123		integral component of membrane [GO:0016021]		+	4	4	3	8.8	8.8	7.4	47.739	0	6.2619	466780000	19	25890000	65327000	21160000	40996000	78593000	81652000	34958000	47985000	12869000	11556000	21135000	12765000	0	0	0	0	0	0	5379300
-0.593611	-0.968765	-1.05003	-1.07484	1.27666	1.32794	0.00574534	0.602497	-0.699851	2.42958	-0.733808	0.495685	-0.440152	0.183455	-0.35263	-0.407881		integral component of membrane [GO:0016021]	ATP binding [GO:0005524];ATPase activity [GO:0016887];ATPase-coupled transmembrane transporter activity [GO:0042626]	+	6	6	6	14.7	14.7	14.7	59.245	0	7.5798	1033800000	25	0	15389000	17568000	21114000	12476000	16499000	15432000	0	42926000	36357000	82610000	38068000	50106000	65797000	86554000	65975000	18210000	66012000	63995000
0.0491984	0.186545	-0.0578494	-0.0701928	-0.104163	0.145967	-0.303023	-0.912915	1.57177	1.85245	1.59786	0.423937	-1.29419	-1.44355	-0.463431	-1.17841	mRNA cis splicing, via spliceosome [GO:0045292];regulation of alternative mRNA splicing, via spliceosome [GO:0000381]	nuclear speck [GO:0016607];nucleolus [GO:0005730];nucleus [GO:0005634]	RNA binding [GO:0003723]	+	4	4	4	7.2	7.2	7.2	91.563	0	29.369	10437000000	22	412730000	820610000	539660000	622000000	449210000	0	480570000	634190000	418780000	399960000	435720000	397110000	289920000	347550000	327000000	290300000	562460000	427860000	571800000
0.596571	-0.768306	0.512454	0.692262	0.922489	-0.498913	-0.060348	-0.846634	1.43301	0.953658	1.09935	0.877657	-1.8096	-1.06063	-0.843682	-1.19933		vacuole [GO:0005773]		+	26	26	26	35	35	35	87.974	0	134.19	6197600000	121	695160000	757640000	633800000	677470000	631910000	770070000	833280000	873660000	44949000	8695500	17093000	6771800	32019000	18607000	26065000	3943200	57195000	33305000	30579000
-0.954104	-0.709769	0.409829	0.567436	-1.56588	-1.82926	-0.644205	0.0703083	-0.336232	0.0147319	-0.0409642	0.105301	0.773249	1.31012	0.948519	1.88092	synaptonemal complex assembly [GO:0007130]	chromosome [GO:0005694];nucleus [GO:0005634]		+	5	5	5	5.6	5.6	5.6	158.52	0	3.8705	596540000	10	56021000	62600000	40418000	63134000	64939000	67206000	70643000	25663000	4133000	15293000	5901100	5578500	2558200	11234000	3719900	4388000	4578200	3536900	30797000
-1.69441	-1.52919	-1.35454	-1.51568	1.07368	0.70498	0.536567	0.768068	-0.282085	-0.0733924	0.161798	-0.203452	0.727491	0.801806	0.794108	1.08425	cellular amino acid metabolic process [GO:0006520];response to zinc ion [GO:0010043]	endoplasmic reticulum [GO:0005783];Golgi apparatus [GO:0005794];plasma membrane [GO:0005886];secretory vesicle [GO:0099503];vacuole [GO:0005773]	aminoacylase activity [GO:0004046];metallopeptidase activity [GO:0008237]	+	43	43	43	82.9	82.9	82.9	48.037	0	323.31	102190000000	864	4332200000	4128300000	3285900000	2892300000	4975600000	5108400000	4780300000	5235900000	2528400000	2495500000	3356600000	2834800000	3781200000	4103100000	4423200000	4125600000	4359100000	2949500000	4976400000
-2.00503	-1.69682	-1.04316	0.0971359	-0.00467645	0.449785	1.8516	0.69026	0.214271	-0.415704	-0.266876	1.42542	-0.195527	0.627422	-0.0934418	0.365344	COPII-coated vesicle cargo loading [GO:0090110];intracellular protein transport [GO:0006886]	COPII vesicle coat [GO:0030127];cytosol [GO:0005829];endoplasmic reticulum exit site [GO:0070971];endoplasmic reticulum membrane [GO:0005789];Golgi membrane [GO:0000139]	GTPase activator activity [GO:0005096];zinc ion binding [GO:0008270]	+	43	43	30	52	52	40	85.377	0	323.31	29854000000	358	2365900000	2735000000	2152400000	2288800000	3448600000	3260300000	2775200000	3465500000	397130000	377430000	511540000	359210000	327600000	423480000	478300000	396940000	448070000	313440000	624880000
-1.41883	-1.77914	-1.47878	-1.44472	0.406093	0.499891	-0.0960138	0.396353	0.804428	1.44162	0.858403	1.12891	0.134237	0.0174134	0.0767659	0.453375	proteolysis [GO:0006508]	chloroplast [GO:0009507];cytoplasm [GO:0005737];cytosol [GO:0005829];cytosolic ribosome [GO:0022626];vacuolar membrane [GO:0005774];vacuole [GO:0005773]	aminopeptidase activity [GO:0004177];serine-type endopeptidase activity [GO:0004252];tripeptidyl-peptidase activity [GO:0008240]	+	158	158	158	87.9	87.9	87.9	152.37	0	323.31	347820000000	1794	22442000000	24686000000	20991000000	19379000000	19636000000	22413000000	19602000000	21807000000	11786000000	10246000000	10979000000	9467300000	11258000000	12161000000	10552000000	12033000000	11991000000	9242400000	11978000000
1.3566	1.35261	1.55768	1.41289	-1.26028	-1.54724	-1.49831	0.0813059	-0.241516	0.15057	-0.159626	0.208352	-0.225439	-0.375541	-0.372949	-0.439107	L-lysine catabolic process [GO:0019477];response to karrikin [GO:0080167]	cytoplasm [GO:0005737];cytosol [GO:0005829]	saccharopine dehydrogenase (NADP+, L-lysine-forming) activity [GO:0047130];saccharopine dehydrogenase activity [GO:0004753]	+	62	62	62	60.2	60.2	60.2	117.16	0	253.6	13610000000	288	694040000	872490000	551760000	658290000	694920000	825570000	555700000	628490000	1837800000	1604700000	1965700000	2073000000	16293000	0	0	182080000	105670000	66584000	51318000
1.50696	1.57355	1.57671	1.28402	-0.683722	0.6882	-0.269541	-0.140466	-1.24262	0.143688	-0.824969	-0.992224	-0.89085	-0.407016	-0.766279	-0.555445	lipid metabolic process [GO:0006629]		phosphoric diester hydrolase activity [GO:0008081]	+	9	9	9	33.8	33.8	33.8	40.357	0	23.288	1333100000	38	0	14711000	0	6914300	102890000	111890000	92849000	80663000	228750000	178930000	261540000	215530000	0	30199000	0	0	0	8199300	0
-1.53987	-1.34246	-0.446082	0.307687	-0.0711449	-1.34113	0.494246	0.267989	-0.694455	-0.482848	-0.591583	0.404184	0.605972	1.89824	1.19394	1.33731	embryo development ending in seed dormancy [GO:0009793];folic acid-containing compound biosynthetic process [GO:0009396];one-carbon metabolic process [GO:0006730];tetrahydrofolate biosynthetic process [GO:0046654]	cytoplasm [GO:0005737];cytosol [GO:0005829];mitochondrial matrix [GO:0005759];mitochondrion [GO:0005739]	ATP binding [GO:0005524];dihydrofolate synthase activity [GO:0008841];metal ion binding [GO:0046872];tetrahydrofolylpolyglutamate synthase activity [GO:0004326]	+	10	10	10	25.8	25.8	25.8	56.903	0	34.945	3433000000	59	9042200	17589000	7043600	6739200	40901000	54365000	31285000	32109000	199190000	200290000	240140000	296530000	194590000	70155000	197700000	211970000	149270000	150180000	143240000
-0.837628	0.703793	-1.94786	-1.24241	1.03441	-0.539362	0.427031	1.05171	0.0977195	-0.787621	-0.00432679	-0.47318	1.77717	-0.105629	-0.423846	1.27004	mitotic sister chromatid cohesion [GO:0007064]			+	54	54	54	35.7	35.7	35.7	181.34	0	181.32	10157000000	229	1034300000	1102500000	957420000	919390000	1492000000	1370700000	1403100000	1686300000	9363600	3507000	0	0	4675100	8662200	0	0	13448000	5166000	15029000
-1.48646	-1.92794	0.387389	-2.28427	0.747221	0.452024	0.474729	-0.553725	0.627428	0.568665	0.318887	0.243254	0.511909	0.50961	0.617983	0.793295	mRNA splicing, via spliceosome [GO:0000398];spliceosomal complex assembly [GO:0000245]	catalytic step 2 spliceosome [GO:0071013];plastid [GO:0009536];post-mRNA release spliceosomal complex [GO:0071014];Prp19 complex [GO:0000974];U2-type catalytic step 2 spliceosome [GO:0071007]		+	7	7	7	11.2	11.2	11.2	84.527	0	19.622	871370000	20	62006000	67678000	43700000	73715000	101630000	120860000	80340000	122000000	0	0	9630100	0	9239100	8369400	9071000	12666000	49690000	9033200	7732200
-1.20727	0.0774673	0.0114527	0.601202	-2.20671	-1.11157	-0.118064	-0.720199	0.968703	0.69557	0.298392	2.02799	-0.516566	0.456671	0.0870676	0.655864		cytoplasm [GO:0005737];cytosol [GO:0005829];mitochondrion [GO:0005739];nucleus [GO:0005634];plastid [GO:0009536]	hydrolase activity [GO:0016787]	+	36	36	33	79.9	79.9	76.4	42.299	0	283.32	60849000000	581	2795400000	3107800000	2040300000	2272700000	2951200000	2326000000	2830700000	2568800000	2813900000	3080900000	2550100000	2899700000	1596200000	1748200000	2344300000	2233700000	2601200000	1937500000	2526000000
-1.36333	-1.52287	-0.965237	-1.77997	-0.39773	-0.244641	0.160106	0.225166	1.09805	0.000517602	0.969436	1.48594	0.711004	1.2011	0.347135	0.0753215	carbohydrate metabolic process [GO:0005975]		hydrolase activity, hydrolyzing O-glycosyl compounds [GO:0004553]	+	10	10	10	24.1	24.1	24.1	45.063	0	72.001	7065500000	54	45797000	8327300	55778000	4197200	21691000	24965000	22033000	41250000	153750000	154700000	327310000	303220000	223830000	269710000	278820000	484060000	825890000	490820000	800970000
-0.968122	0.317363	-0.31734	-1.25734	1.21384	1.45338	0.879662	1.9064	0.777282	-0.652018	-0.968475	-0.633384	0.226344	-1.12141	-0.776505	-0.0796804	regulation of translational fidelity [GO:0006450]	cytoplasm [GO:0005737]	double-stranded RNA binding [GO:0003725];nucleotidyltransferase activity [GO:0016779];tRNA binding [GO:0000049]	+	3	3	3	12.5	12.5	12.5	31.303	0	7.388	533950000	9	12785000	6275900	0	0	20038000	9609600	11462000	12951000	26014000	31394000	17089000	7617800	45131000	41885000	46235000	54373000	26700000	6571100	32130000
-1.38427	-1.47706	-1.15058	-1.01832	0.654133	0.761963	0.393464	0.518741	-0.691783	-0.409586	-0.491072	-0.553378	1.04475	1.29942	1.22682	1.27676	isopentenyl diphosphate biosynthetic process, methylerythritol 4-phosphate pathway [GO:0019288];response to bacterium [GO:0009617];systemic acquired resistance, salicylic acid mediated signaling pathway [GO:0009862];terpenoid biosynthetic process [GO:0016114]	chloroplast [GO:0009507];chloroplast envelope [GO:0009941];chloroplast stroma [GO:0009570];plastid [GO:0009536]	4 iron, 4 sulfur cluster binding [GO:0051539];4-hydroxy-3-methylbut-2-en-1-yl diphosphate synthase activity [GO:0046429];iron ion binding [GO:0005506]	+	48	48	48	64.4	64.4	64.4	82.256	0	323.31	26778000000	525	687760000	539420000	441770000	480730000	656680000	886930000	612750000	668080000	776020000	804380000	2466500000	1159400000	1243100000	1388100000	1165000000	1267200000	1057500000	892180000	1219600000
0.638059	-0.380733	2.37935	0.932927	1.12842	0.516787	0.339019	-0.604855	-0.674233	-0.741569	-1.49315	0.26314	-0.780668	0.388865	-0.908009	-1.00335		chloroplast [GO:0009507]	nucleoside-triphosphate diphosphatase activity [GO:0047429]	+	10	10	10	40.1	40.1	40.1	22.565	0	49.93	4209400000	78	14664000	11127000	0	7883800	0	21305000	3018700	6163600	337650000	327670000	453250000	386310000	348000000	192620000	205540000	224960000	233330000	156650000	212450000
-0.944003	-0.196395	-0.334721	-0.0745618	-1.25982	-0.741895	-0.101148	-1.90557	0.628472	-0.449927	0.65871	0.169372	1.61893	0.367575	0.551721	2.01326	methylation [GO:0032259];vesicle-mediated transport [GO:0016192]	integral component of membrane [GO:0016021]	methyltransferase activity [GO:0008168];nucleic acid binding [GO:0003676]	+	11	11	11	16.2	16.2	16.2	120.06	0	45.82	2155600000	64	104360000	236680000	133930000	167270000	240640000	244730000	219050000	217380000	14218000	20440000	27166000	27719000	17281000	20182000	23152000	8912800	35542000	191300000	44074000
-0.526648	-1.63442	-0.526525	0.286358	-0.397924	0.501612	-0.232438	-1.86875	-0.452832	0.203946	-0.354297	-0.19382	0.941509	1.35769	1.0003	1.89625		chloroplast [GO:0009507];chloroplast envelope [GO:0009941];chloroplast stroma [GO:0009570]	hydrolase activity [GO:0016787]	+	11	11	11	13.7	13.7	13.7	105.05	0	19.485	1661200000	61	17784000	8615900	5979700	9489000	24064000	16118000	6268800	39564000	68346000	73550000	70107000	81677000	76849000	88830000	75869000	47688000	99079000	84350000	114780000
-0.785491	0.0255042	-0.241795	-0.1185	0.269696	0.935639	0.7884	0.755294	-1.73961	-1.49099	-1.01736	-1.31597	0.650458	0.806042	1.17297	1.30571			oxidoreductase activity [GO:0016491]	+	22	22	22	50.8	50.8	50.8	46.653	0	85.722	9072500000	223	182070000	201070000	118150000	168600000	460540000	338320000	278710000	196100000	469460000	447770000	571470000	424680000	298530000	412670000	392620000	429610000	245030000	260710000	371020000
-1.53648	-0.399738	-1.52992	-1.54949	0.107959	0.955298	1.00744	-0.0448779	-0.487098	-0.0567499	-0.239206	-0.0906124	0.0243462	1.25388	0.755844	1.82939	folic acid-containing compound biosynthetic process [GO:0009396];lignin biosynthetic process [GO:0009809];one-carbon metabolic process [GO:0006730];quiescent center organization [GO:1904961];root development [GO:0048364];root hair elongation [GO:0048767];root meristem growth [GO:0010449];tetrahydrofolylpolyglutamate biosynthetic process [GO:0046901]	chloroplast [GO:0009507];cytoplasm [GO:0005737];cytosol [GO:0005829];mitochondrion [GO:0005739]	ATP binding [GO:0005524];metal ion binding [GO:0046872];tetrahydrofolylpolyglutamate synthase activity [GO:0004326]	+	34	34	32	67.3	67.3	63.9	63.345	0	305.1	26226000000	383	1461200000	1781300000	1441200000	1358000000	2124900000	2319700000	2112600000	2221000000	591780000	1093700000	765710000	668850000	515730000	806020000	608470000	688350000	676720000	445690000	576130000
-0.931682	-1.46808	-0.584888	-0.182353	1.45552	0.652049	0.695324	0.347588	-1.152	-0.763074	-1.05893	-1.03418	1.09802	1.37195	0.609089	0.945645		chloroplast [GO:0009507];cytosol [GO:0005829];plastid [GO:0009536]	serine-type peptidase activity [GO:0008236]	+	62	62	62	64.9	64.9	64.9	81.305	0	323.31	79933000000	860	2618400000	2632200000	2109400000	2125500000	2879000000	2714900000	2507300000	2733800000	4031700000	3347900000	3649700000	3398400000	3615100000	3773800000	3505000000	3651200000	3528700000	2904900000	3357400000
-0.55986	0.435477	-0.719711	0.870333	-1.11393	0.636371	-0.168074	0.963317	-0.908037	-1.37868	-0.458916	-1.48543	-0.0770217	1.14028	1.10886	1.71502			nucleoside-triphosphate diphosphatase activity [GO:0047429]	+	16	16	16	74.3	74.3	74.3	22.825	0	32.916	5322200000	97	211180000	307770000	144660000	221640000	250800000	344930000	304940000	293800000	208180000	211790000	241370000	208830000	121790000	260040000	165800000	206740000	192550000	82837000	189070000
-1.55612	-2.37542	-0.938669	-0.835773	0.339223	0.323329	0.211334	0.337606	1.22905	1.10626	1.08249	0.986491	0.263083	-0.0386996	0.0302694	-0.164452	protein stabilization [GO:0050821];response to cold [GO:0009409];rRNA processing [GO:0006364]	chloroplast [GO:0009507];ribonucleoprotein complex [GO:1990904]	GTP binding [GO:0005525];GTPase activity [GO:0003924];translation elongation factor activity [GO:0003746]	+	19	19	19	41.2	41.2	41.2	74.314	0	69.388	2739500000	57	53057000	57818000	45266000	35442000	50151000	27444000	22907000	51105000	5005300	0	14884000	75378000	141730000	94204000	39449000	146270000	383970000	245610000	364580000
1.37272	1.30362	0.907157	-1.12751	-0.97854	-2.38703	-0.52175	-0.481125	-0.0863896	0.761559	0.775314	0.661121	0.0135014	0.489839	-0.50991	-0.192567	production of miRNAs involved in gene silencing by miRNA [GO:0035196];regulation of transcription by RNA polymerase II [GO:0006357]	core mediator complex [GO:0070847];mediator complex [GO:0016592]	transcription coregulator activity [GO:0003712]	+	3	3	3	6.9	6.9	6.9	73.403	1	-2	191080000	10	4781400	12925000	16250000	13532000	7331100	31327000	15572000	22780000	5760400	3916600	4815400	0	1200000	0	6782100	9020100	2619100	2913800	3310100
-0.662097	0.858641	0.796208	0.589193	-0.120643	0.44026	0.856898	0.0932419	-0.533079	-2.07687	-0.624136	-1.68317	-0.846413	0.660187	0.687578	1.5642				+	2	2	2	10.3	10.3	10.3	31.819	0	4.056	475440000	46	16539000	23686000	17735000	15940000	25394000	24293000	20700000	22831000	20039000	22670000	26818000	23480000	15183000	19241000	21226000	15819000	16306000	9158700	16208000
1.61059	1.67709	1.59564	1.59382	-0.403458	-0.997831	-0.614721	-0.227904	-0.405144	-1.02721	-0.0646743	-0.572793	-0.171747	-0.73969	-0.567335	-0.684628	cellular response to hypoxia [GO:0071456];response to cold [GO:0009409];response to karrikin [GO:0080167];response to oxidative stress [GO:0006979]	chloroplast [GO:0009507];cytosol [GO:0005829];plasmodesma [GO:0009506]	catalytic activity [GO:0003824];mRNA binding [GO:0003729]	+	55	55	52	57.2	57.2	55.6	94.215	0	282.51	23233000000	314	823020000	1014400000	753990000	607250000	1790400000	1698300000	1511800000	1646800000	3187900000	2963800000	3843700000	3258500000	22653000	0	0	9868700	24030000	1132600	43431000
-0.225408	0.113089	-0.548455	0.457402	0.611096	0.813744	0.426137	0.584325	0.132748	0.990369	0.0160037	0.757195	-1.55693	-0.240092	-2.91156	0.580344	histone H3-K27 trimethylation [GO:0098532]			+	5	5	5	4.4	4.4	4.4	118.09	1	-2	972190000	10	82234000	96723000	60582000	52907000	153980000	154770000	110990000	144060000	4544000	5544500	0	13933000	19709000	7256400	6692700	7754100	5992600	18441000	5480500
0.247896	0.122737	0.129309	-0.0851886	0.159388	0.162969	0.165451	-0.017256	-0.852563	-0.765568	-2.79336	-0.844998	0.922654	1.23536	0.820576	1.39259	regulation of double-strand break repair [GO:2000779]	mitochondrion [GO:0005739];nucleus [GO:0005634];plastid [GO:0009536]	histone binding [GO:0042393]	+	14	14	14	20.8	20.8	20.8	87.206	0	27.127	2401300000	56	233040000	168160000	172170000	179260000	334990000	289710000	218930000	269600000	25029000	30539000	28097000	19320000	9396300	31841000	14912000	21053000	3300400	12250000	711380
1.817	1.23347	1.68964	1.65416	-0.35504	-0.572081	-0.288592	-0.4073	-1.08919	-0.799362	-0.996503	-0.826831	-0.098823	-0.114617	-0.403567	-0.442357	protein catabolic process [GO:0030163];proteolysis [GO:0006508]	cell wall [GO:0005618]	aspartic-type endopeptidase activity [GO:0004190]	+	27	27	27	45.9	45.9	45.9	48.694	0	78.707	39559000000	304	926190000	980080000	681980000	602240000	1935900000	1600700000	1599100000	1493300000	3003100000	2387200000	3410300000	3175200000	1247500000	1167500000	1440300000	1442600000	1141300000	1127300000	1291700000
0.610691	0.839106	1.07245	1.01669	0.523686	-0.159322	0.259144	-0.148342	-1.53922	-0.801312	-2.82178	0.461595	0.242723	-0.0123318	0.241905	0.214317				+	2	2	2	2.1	2.1	2.1	128.83	0.0064251	1.6469	392080000	12	5257900	6400100	5843800	5566600	7333200	5311300	7016800	7257700	32332000	37028000	51557000	44325000	18762000	12221000	19190000	12942000	0	0	0
0.939611	1.23944	1.17743	1.12007	-1.93917	-1.71023	0.404338	-1.39812	0.170212	-0.551558	0.22369	0.149018	0.213109	0.199927	0.436718	-0.674488	defense response [GO:0006952];defense response to fungus [GO:0050832];defense response to insect [GO:0002213];response to wounding [GO:0009611]		serine-type endopeptidase inhibitor activity [GO:0004867]	+	7	7	7	53.5	53.5	53.5	11.081	0	40.128	1276400000	26	26390000	22955000	28031000	3052500	34178000	26436000	31163000	24521000	257680000	214890000	170830000	263430000	0	0	21345000	0	12011000	7300100	14301000
-0.466622	-0.930327	-0.753812	-1.59791	0.539486	1.40605	0.392786	1.79978	0.0631426	-1.12808	-1.15174	-0.452875	-0.204261	0.824857	0.493292	1.16623			hydrolase activity [GO:0016787]	+	22	22	22	35.2	35.2	35.2	72.949	0	101.23	10597000000	163	655480000	762380000	688560000	550030000	793780000	515120000	748320000	877050000	227010000	304240000	210350000	243120000	276420000	367660000	330100000	258970000	430560000	301600000	372280000
-1.43182	-0.933856	-1.84234	-1.37545	-0.386218	-0.552876	0.375755	0.548431	0.636028	0.901459	1.21266	1.5714	0.385986	0.0396409	0.761091	0.0901017		cell wall [GO:0005618];extracellular region [GO:0005576];plasmodesma [GO:0009506]	copper ion binding [GO:0005507];oxidoreductase activity [GO:0016491]	+	16	15	15	32.8	31.5	31.5	65.838	0	94.314	6057100000	126	364830000	291480000	233600000	224330000	394000000	434560000	452970000	376450000	110090000	167190000	135220000	186810000	109970000	157880000	189550000	236310000	289620000	215560000	363010000
-0.811577	-2.21473	-1.319	-1.13733	0.585896	0.544529	0.504652	1.44075	0.312952	-0.133895	0.187681	1.61391	0.255869	-0.231096	-0.287959	0.689346			kinase activity [GO:0016301];phosphotransferase activity, alcohol group as acceptor [GO:0016773]	+	3	3	3	8.2	8.2	8.2	39.133	0	6.9459	634690000	9	49559000	38421000	31618000	12431000	30206000	0	0	12297000	30969000	15385000	30496000	24071000	20416000	29750000	31064000	42314000	30569000	20858000	28785000
-0.21674	0.824803	-0.624127	-1.49586	1.75217	0.104528	0.814106	-0.20061	-0.597904	-0.223364	-1.21632	-1.3996	-0.173526	-0.0440506	1.76554	0.930946	exocytosis [GO:0006887];protein transport [GO:0015031]	cytosol [GO:0005829];exocyst [GO:0000145];plasma membrane [GO:0005886]		+	13	13	13	23.1	23.1	23.1	76.616	0	19.333	8724200000	39	117200000	190080000	132450000	171200000	184620000	219400000	167140000	106110000	510150000	565320000	63014000	505380000	374860000	529120000	487640000	525750000	417950000	288740000	384750000
-0.687972	-1.38945	-0.501844	-0.530851	0.394175	-0.60842	-1.72958	0.430999	1.76325	0.0993594	1.48333	1.10133	-0.112065	-0.291739	1.17349	-0.593999		plasmodesma [GO:0009506]		+	4	4	4	8.9	8.9	8.9	62.04	0	4.2855	324000000	8	0	0	2561000	0	0	0	0	0	9700600	6189200	11355000	10224000	24171000	8212700	0	39436000	37010000	13212000	28985000
-2.0835	-2.18264	-0.434351	-0.222178	0.0679236	0.53136	0.886304	0.846898	-0.635629	-0.482074	-0.0743826	0.316582	0.707512	1.1386	0.718481	0.9011	protein phosphorylation [GO:0006468]	integral component of membrane [GO:0016021];plasma membrane [GO:0005886]	ATP binding [GO:0005524];transmembrane receptor protein serine/threonine kinase activity [GO:0004675]	+	6	6	6	8	8	8	119.24	0	16.801	1154600000	29	9248900	16384000	11677000	0	20582000	8953500	8047300	9677500	35921000	41801000	70513000	65877000	58506000	85171000	76167000	56463000	79325000	45942000	89737000
1.20281	0.178568	1.42652	0.535035	0.104678	-0.846793	-0.344304	-0.0289604	-0.638287	-0.541514	1.12194	1.33604	0.337095	-2.27126	-0.560841	-1.01072		cytoplasm [GO:0005737];cytosol [GO:0005829];nucleus [GO:0005634]	zinc ion binding [GO:0008270]	+	17	17	17	45	45	45	54.076	0	130.29	4807300000	84	591510000	567720000	383170000	518090000	619230000	457980000	496530000	577030000	27785000	19497000	57336000	32513000	36100000	21803000	39797000	38352000	46002000	22733000	83419000
-0.250588	-0.954484	1.03687	1.05725	1.26049	1.00477	0.931355	0.912601	-1.09247	1.13381	-0.46033	-0.485991	-1.51996	-0.841367	-0.654456	-1.07751	carbon fixation [GO:0015977];photorespiration [GO:0009853];photosynthesis [GO:0015979]	chloroplast [GO:0009507]	monooxygenase activity [GO:0004497];ribulose-bisphosphate carboxylase activity [GO:0016984]	+	26	8	8	67.2	45.4	45.4	19.395	0	323.31	247850000000	378	6679000	0	15924000	8766300	55468000	23816000	15543000	6010500	14783000000	13982000000	21570000000	19898000000	16022000000	16057000000	15954000000	16346000000	14108000000	15436000000	13691000000
0.358583	0.934594	1.75646	1.52755	0.537054	0.952657	0.617525	0.274345	-1.30936	-1.01364	-1.07433	-1.2429	-0.591442	-0.476067	-0.373568	-0.877465	methylation [GO:0032259]		methyltransferase activity [GO:0008168]	+	4	4	4	13.5	13.5	13.5	37.202	0	5.5611	761750000	22	4666100	0	0	0	0	57797000	0	0	49436000	29770000	109180000	37775000	56303000	25682000	61232000	38719000	46224000	27631000	27803000
-0.746579	-0.662844	-0.399048	-0.236059	2.35323	2.32734	0.0484553	-0.171817	-0.382537	0.944377	-0.48401	-0.193596	-0.488576	-0.475179	-0.696609	-0.736552	DNA replication initiation [GO:0006270];DNA unwinding involved in DNA replication [GO:0006268];double-strand break repair via break-induced replication [GO:0000727];mitotic DNA replication [GO:1902969];pre-replicative complex assembly involved in nuclear cell cycle DNA replication [GO:0006267]	MCM complex [GO:0042555];nucleus [GO:0005634];THO complex [GO:0000347]	ATP binding [GO:0005524];DNA helicase activity [GO:0003678];DNA replication origin binding [GO:0003688];metal ion binding [GO:0046872];single-stranded DNA binding [GO:0003697]	+	14	14	14	19.7	19.7	19.7	92.85	0	19.514	59833000000	48	245100000	251040000	197020000	180400000	147360000	178130000	175670000	257630000	3827400000	3756800000	4023500000	3513500000	4168100000	4085300000	3682800000	3911600000	3722800000	3664100000	3608400000
1.29919	1.37154	0.200633	1.23578	-1.72366	-0.780095	0.272937	0.123224	0.125872	0.478721	0.331739	0.550693	0.442461	-1.64146	-1.02259	-1.26497	cell morphogenesis [GO:0000902]	cell cortex [GO:0005938];plasma membrane [GO:0005886];site of polarized growth [GO:0030427]		+	16	16	16	8.3	8.3	8.3	242.5	0	30.506	6393700000	57	271410000	342410000	289740000	361120000	444300000	585330000	403240000	433320000	385680000	538590000	483400000	514080000	41569000	72235000	47369000	48457000	137430000	120830000	171930000
1.3419	1.26584	1.57933	2.05514	-1.3215	-0.782559	-0.080969	-0.131363	-0.340874	-0.883731	-0.836291	-0.386251	-0.325018	-0.504185	-0.624712	-0.0247667	fatty acid metabolic process [GO:0006631]	peroxisome [GO:0005777]	ligase activity [GO:0016874]	+	29	29	28	42.9	42.9	41.3	79.18	0	142.02	7547900000	157	229060000	263890000	166260000	210710000	335900000	486800000	462700000	1051100000	589740000	451010000	630240000	956330000	82511000	75509000	150550000	126060000	139490000	82817000	102700000
0.489784	0.925732	-0.148509	1.46089	0.215485	0.303544	1.54954	-0.0845707	0.516988	-0.460515	-0.446265	-0.311251	-2.79074	-0.512482	-0.10534	-0.602284	chromatin organization [GO:0006325]	nucleus [GO:0005634];plasmodesma [GO:0009506]	ATP binding [GO:0005524];DNA binding [GO:0003677];helicase activity [GO:0004386];metal ion binding [GO:0046872]	+	5	4	4	2.2	1.8	1.8	247.92	1	-2	6355300000	10	0	23830000	19375000	11915000	33025000	60388000	37358000	39907000	419970000	516040000	684370000	162010000	33802000	612590000	569090000	101050000	550740000	286480000	93543000
-0.836184	0.0820275	-0.676823	-0.605916	0.00885057	-1.09438	0.356748	-0.0704312	1.51897	1.16672	1.85982	1.35985	-0.0304945	-1.24809	-0.908769	-0.881894	tetrahydrobiopterin biosynthetic process [GO:0006729]		4-alpha-hydroxytetrahydrobiopterin dehydratase activity [GO:0008124]	+	10	10	10	63.7	63.7	63.7	20.908	0	135.17	6769900000	103	0	15868000	11112000	4097300	16400000	8357300	0	0	349100000	278250000	344020000	227360000	205320000	207000000	265810000	256510000	1082600000	597880000	1043700000
1.74372	1.65848	1.49761	1.61398	-0.682585	-0.625331	-0.331324	-0.704634	-0.187036	-0.513015	-0.140634	-0.170025	-0.904672	-0.728815	-0.899851	-0.625862		apoplast [GO:0048046];cell wall [GO:0005618]	manganese ion binding [GO:0030145];nutrient reservoir activity [GO:0045735]	+	3	3	3	24.5	24.5	24.5	21.352	0	8.2068	1638800000	38	20470000	44002000	20321000	16926000	40392000	18485000	23698000	16793000	288290000	278530000	322990000	289950000	13270000	16132000	22974000	17514000	34886000	23858000	32366000
0.973456	0.852268	1.59161	1.22611	-0.170503	0.534156	0.92577	0.0968125	-0.904876	-0.830967	-1.52585	-1.81676	-0.952596	-0.131932	0.202196	-0.0688893			hydrolase activity [GO:0016787]	+	11	11	11	37.2	37.2	37.2	34.08	0	44.196	2761100000	92	21853000	28323000	79358000	31380000	63813000	87160000	40624000	45424000	206100000	189470000	256700000	196440000	107080000	139050000	154850000	135050000	80876000	88976000	90197000
-0.742226	0.378535	-0.532866	0.0199106	-0.0559238	0.353953	0.620229	0.580536	-0.913832	-1.45093	-1.09412	-1.83226	1.39075	0.945517	1.41911	0.913621	thiamine biosynthetic process [GO:0009228]	cytosol [GO:0005829];mitochondrion [GO:0005739]	thiaminase activity [GO:0050334];thiamine phosphate phosphatase activity [GO:0042131]	+	19	19	19	31.1	31.1	31.1	68.963	0	47.515	5220800000	138	296940000	308070000	304020000	238900000	404930000	423120000	368300000	399540000	149490000	125570000	159290000	149770000	141060000	140050000	105190000	137760000	123950000	99655000	94810000
-1.81671	-1.25907	-1.48541	-1.09539	0.476268	0.875474	0.684543	0.569851	0.366156	-0.610423	0.581752	-0.52445	0.480463	0.532932	0.47433	1.74968			serine-type endopeptidase activity [GO:0004252]	+	23	23	23	50	50	50	46.259	0	122.51	13000000000	187	159240000	85541000	120030000	91575000	90157000	95167000	137820000	124180000	564370000	591480000	542250000	498920000	532750000	691560000	1060900000	766810000	741990000	575750000	776870000
1.08655	1.10095	1.5031	1.33404	-1.66292	-1.05053	-0.814493	-0.322176	0.83531	-0.30379	0.779718	0.451049	-0.630468	-0.867477	-0.989288	-0.449579		nucleolus [GO:0005730];plastid [GO:0009536]	GTP binding [GO:0005525];GTPase activity [GO:0003924]	+	58	58	58	48.6	48.6	48.6	122.78	0	257.86	19885000000	401	1334400000	1603400000	1292100000	1125100000	2576900000	1815700000	1666300000	1716300000	584350000	644680000	705850000	458220000	196370000	263630000	288960000	303430000	566510000	326580000	597870000
1.1981	-0.785522	1.82363	0.622323	-0.856632	-0.421326	-0.308365	-0.171499	-0.792313	-1.74806	0.497916	-1.42683	0.653372	0.730046	1.11962	-0.134456	fructose 1,6-bisphosphate metabolic process [GO:0030388];gluconeogenesis [GO:0006094];glycolytic process [GO:0006096]	cytosol [GO:0005829]	fructose-bisphosphate aldolase activity [GO:0004332]	+	21	14	14	51.4	42.7	42.7	42.906	0	27.497	4169900000	84	15173000	48935000	26419000	16204000	6224600	0	0	0	178020000	121180000	366300000	545100000	86013000	167490000	126500000	144390000	152750000	99718000	273080000
1.54543	1.7827	1.60476	1.56158	-0.385308	-0.247753	-0.396843	-0.305884	-0.350518	-0.454451	-0.343367	-0.411228	-1.0915	-1.01804	-0.796645	-0.692937	lytic vacuole organization [GO:0080171]	chloroplast [GO:0009507];cytosol [GO:0005829];plasma membrane [GO:0005886]	kinase activity [GO:0016301]	+	189	189	189	69.3	69.3	69.3	323	0	323.31	80738000000	1399	6125400000	7327500000	5408700000	6103600000	5166100000	5387400000	5670500000	5197600000	5857600000	6269600000	6342300000	5599100000	748820000	1033600000	857320000	966720000	992120000	725220000	1163200000
-1.17927	-1.29433	-1.67053	-1.53499	1.02419	0.816886	0.712321	0.739356	-0.316102	-0.158443	-0.708492	-0.0911971	0.921444	1.01194	0.955389	0.771824		chloroplast thylakoid lumen [GO:0009543];thylakoid lumen [GO:0031977]	endopeptidase activity [GO:0004175];serine-type peptidase activity [GO:0008236]	+	24	24	24	50.9	50.9	50.9	53.033	0	88.135	5671600000	124	10475000	68023000	66287000	106180000	66662000	185880000	68368000	78993000	116680000	90989000	77033000	68461000	350360000	437340000	361570000	426660000	242250000	144000000	214850000
0.586632	0.731305	0.568009	0.647972	-0.529903	-0.469501	0.659124	0.673826	-1.45323	-2.35469	-1.66985	0.617183	0.531865	0.169956	0.551959	0.739349	D-serine biosynthetic process [GO:0070179];L-serine biosynthetic process [GO:0006564]		phosphatase activity [GO:0016791];phosphoserine phosphatase activity [GO:0004647]	+	21	21	21	69.3	69.3	69.3	26.474	0	79.614	4822700000	75	408040000	527660000	527890000	480110000	546490000	790710000	588460000	620610000	24426000	36432000	24409000	29265000	2973000	4202400	26307000	27970000	0	0	0
-0.39864	-0.345645	-0.056031	-0.908183	-0.703795	-0.692829	-0.928135	-0.618282	-0.771898	-0.809616	-0.734036	1.32394	1.27154	1.27215	1.33387	1.76559		protein kinase CK2 complex [GO:0005956]	kinase activity [GO:0016301];protein kinase regulator activity [GO:0019887]	+	5	5	5	16.2	16.2	16.2	28.373	0	2.9571	6209400000	10	191180000	229530000	198500000	277140000	190220000	241770000	215130000	197250000	0	0	0	0	0	0	0	0	0	0	0
0.416147	0.261162	0.627338	0.360597	0.967756	0.629695	0.882633	1.00294	0.555191	0.424458	0.280748	0.0143233	-1.53647	-2.01975	-1.44542	-1.42134	photorespiration [GO:0009853];reductive pentose-phosphate cycle [GO:0019253];response to abscisic acid [GO:0009737];response to cadmium ion [GO:0046686]	apoplast [GO:0048046];cell wall [GO:0005618];chloroplast [GO:0009507];chloroplast envelope [GO:0009941];chloroplast stroma [GO:0009570];chloroplast thylakoid membrane [GO:0009535];cytosolic ribosome [GO:0022626];plastid [GO:0009536];plastoglobule [GO:0010287];thylakoid [GO:0009579]	magnesium ion binding [GO:0000287];monooxygenase activity [GO:0004497];ribulose-bisphosphate carboxylase activity [GO:0016984]	+	97	97	91	77.7	77.7	77.7	52.954	0	323.31	5541200000000	9549	738470000	914350000	583500000	893040000	2377100000	2193500000	1580300000	1417600000	363020000000	338070000000	414370000000	369190000000	295780000000	332350000000	339840000000	360830000000	384160000000	262940000000	376980000000
-0.460322	0.0927087	-1.96518	-1.60114	1.28192	0.135056	1.16017	0.43075	0.338765	0.921436	0.573291	0.742585	0.488653	-0.802908	-1.54576	0.209979	embryo sac development [GO:0009553];glucose mediated signaling pathway [GO:0010255];pollen development [GO:0009555];positive regulation of RNA polymerase II transcription preinitiation complex assembly [GO:0045899];proteasomal protein catabolic process [GO:0010498];regulation of transcription by RNA polymerase II [GO:0006357]	cytosol [GO:0005829];extracellular region [GO:0005576];nucleus [GO:0005634];plasma membrane [GO:0005886];proteasome complex [GO:0000502];proteasome regulatory particle, base subcomplex [GO:0008540];protein-containing complex [GO:0032991]	ATP binding [GO:0005524];hydrolase activity [GO:0016787]	+	37	9	9	72.1	19.4	19.4	47.037	0	27.211	1334400000	23	159150000	156080000	123790000	165140000	101550000	162590000	179390000	163720000	5291700	4808800	0	0	16179000	4494200	16351000	6579400	6751400	27902000	8900600
1.17712	1.2194	1.01382	1.3712	-0.142415	-0.522837	-0.508187	0.117854	0.167433	0.759656	-0.374931	0.0526859	-2.60417	-0.867548	-0.459582	-0.399505	cellular response to hypoxia [GO:0071456];protein targeting to vacuole [GO:0006623]	endoplasmic reticulum [GO:0005783];endoplasmic reticulum membrane [GO:0005789];extracellular region [GO:0005576];integral component of membrane [GO:0016021];plasma membrane [GO:0005886];protein storage vacuole [GO:0000326];protein storage vacuole membrane [GO:0032586]		+	10	10	10	34	34	34	34.189	0	27.361	2870800000	33	211360000	263040000	185660000	51630000	242990000	203990000	241870000	208580000	167680000	163670000	139400000	297980000	39078000	29038000	39088000	41810000	55392000	60424000	51243000
1.35106	1.46316	1.50827	1.44959	-0.145889	0.323473	-0.98793	-0.612721	0.020007	-2.00001	-0.479506	-0.511506	-0.0188394	-0.660366	-0.411438	-0.287351			phosphatase activity [GO:0016791]	+	5	5	5	24.9	24.9	24.9	32.678	0	24.859	781070000	15	56926000	78830000	46438000	50062000	60761000	77566000	73632000	47904000	55239000	37790000	49954000	41557000	5270000	10275000	4686600	16367000	12222000	0	8241200
0.967411	0.934829	0.254236	0.150544	-2.26714	-2.31833	-0.376949	-0.586532	0.350586	0.327556	0.190758	-0.177196	0.984249	0.556855	0.594709	0.414411	response to karrikin [GO:0080167]	chloroplast [GO:0009507];chloroplast stroma [GO:0009570]	2 iron, 2 sulfur cluster binding [GO:0051537];electron transfer activity [GO:0009055];metal ion binding [GO:0046872]	+	4	3	3	57.4	57.4	57.4	15.897	0	99.936	6886900000	46	18919000	0	0	14499000	7638000	0	0	23316000	641260000	534500000	486660000	366570000	113030000	114440000	311290000	236600000	457370000	383150000	458810000
-1.45221	-2.16705	-1.54104	-1.44743	0.55928	0.578977	0.544827	0.54441	0.617631	0.611357	0.651576	0.700915	0.398659	0.484981	0.460796	0.454311	cellular amino acid metabolic process [GO:0006520];L-serine biosynthetic process [GO:0006564]	chloroplast [GO:0009507];chloroplast stroma [GO:0009570];cytosol [GO:0005829];nucleus [GO:0005634]	NAD binding [GO:0051287];phosphoglycerate dehydrogenase activity [GO:0004617]	+	46	43	43	67.5	64.7	64.7	66.453	0	323.31	58198000000	523	5898900000	7181700000	5293600000	5592300000	3943200000	4040100000	3997300000	3897700000	50510000	20449000	39852000	49321000	996790000	1302400000	1283900000	1430500000	1939400000	1296900000	2199100000
-2.3378	-2.38763	-0.575588	-0.370364	0.80985	0.793619	0.255705	0.523082	0.285887	0.565678	0.427229	0.326854	0.61508	0.155412	0.795905	0.117087	cyclic nucleotide metabolic process [GO:0009187];tRNA splicing, via endonucleolytic cleavage and ligation [GO:0006388]	cytoplasm [GO:0005737];cytosol [GO:0005829]	2',3'-cyclic-nucleotide 3'-phosphodiesterase activity [GO:0004113]	+	12	12	12	68.5	68.5	68.5	20.514	0	63.714	3876700000	73	322310000	270780000	188880000	211160000	285660000	360830000	348900000	269860000	26381000	31665000	79422000	54669000	115030000	137480000	84324000	137250000	71229000	51909000	122480000
-1.61537	-0.894485	-1.64121	-1.69523	1.56201	1.09548	0.197505	0.664428	0.478683	0.903292	0.585784	0.658676	-0.0430094	-0.279692	0.0226023	0.000541766	endoplasmic reticulum unfolded protein response [GO:0030968];protein folding [GO:0006457];response to cadmium ion [GO:0046686];response to endoplasmic reticulum stress [GO:0034976];response to oxidative stress [GO:0006979]	endoplasmic reticulum [GO:0005783];endoplasmic reticulum lumen [GO:0005788];endoplasmic reticulum membrane [GO:0005789];mitochondrion [GO:0005739];nucleus [GO:0005634];plasmodesma [GO:0009506];secretory vesicle [GO:0099503];vacuolar membrane [GO:0005774]	calcium ion binding [GO:0005509];carbohydrate binding [GO:0030246];unfolded protein binding [GO:0051082]	+	60	43	43	84.5	71.1	71.1	48.527	0	323.31	68793000000	612	3149500000	3765100000	3481200000	3005900000	5473000000	5729500000	5497300000	5265100000	1590000000	1597700000	1869100000	1617700000	1848900000	2017200000	2105100000	2143900000	2522100000	1942100000	2345500000
-1.34578	-1.44992	-1.53146	-1.7812	1.25852	0.991881	0.990277	0.993234	0.10335	0.0114149	-0.0273969	-0.153296	0.673289	0.47493	0.450779	0.341382	anthocyanin-containing compound metabolic process [GO:0046283];defense response to bacterium [GO:0042742];endoplasmic reticulum unfolded protein response [GO:0030968];innate immune response-activating signal transduction [GO:0002758];plant-type hypersensitive response [GO:0009626];protein folding [GO:0006457]	endoplasmic reticulum [GO:0005783];endoplasmic reticulum lumen [GO:0005788];endoplasmic reticulum membrane [GO:0005789];extracellular region [GO:0005576]	calcium ion binding [GO:0005509];carbohydrate binding [GO:0030246];unfolded protein binding [GO:0051082]	+	46	46	46	68.9	68.9	68.9	49.843	0	323.31	46355000000	499	175230000	135900000	90651000	85701000	288220000	274940000	283420000	304510000	1714000000	1416300000	1653600000	1226600000	3358700000	3734600000	3708500000	3801700000	2806200000	2159500000	2670900000
-1.12733	-1.37045	-1.05986	-1.46974	0.570138	0.764952	0.664154	0.902667	-0.146076	-0.322302	-0.713063	-1.01091	0.975266	0.907755	1.16049	1.27432	amylopectin biosynthetic process [GO:0010021];starch biosynthetic process [GO:0019252];starch catabolic process [GO:0005983]	chloroplast [GO:0009507];chloroplast isoamylase complex [GO:0010368]	isoamylase activity [GO:0019156]	+	17	17	17	25.7	25.7	25.7	89.48	0	45.334	6896200000	81	7348100	11282000	0	0	7014500	3264800	18173000	0	188560000	392480000	366090000	393860000	166390000	372100000	360560000	478880000	321660000	240500000	379540000
-1.02924	-0.619671	0.299996	0.345642	0.149828	0.793356	0.923862	0.337005	-0.976519	-2.20703	-1.43931	-0.370282	0.782066	0.875229	0.929612	1.20545	anther dehiscence [GO:0009901];defense response [GO:0006952];defense response to bacterium [GO:0042742];defense response to fungus [GO:0050832];extracellular ATP signaling [GO:0106167];jasmonic acid and ethylene-dependent systemic resistance [GO:0009861];jasmonic acid mediated signaling pathway [GO:0009867];negative regulation of defense response [GO:0031348];protein ubiquitination [GO:0016567];r…			+	12	12	12	25.7	25.7	25.7	67.665	0	20.518	3476800000	56	128050000	114320000	105880000	105470000	215290000	270110000	133300000	335080000	40342000	38536000	156340000	138110000	90743000	164060000	149600000	212670000	130280000	26461000	72739000
-1.04269	-0.949984	-1.25523	-0.818361	0.848932	0.854208	0.831413	0.806506	0.902571	0.867636	0.865997	-1.03589	-1.0987	-1.42092	0.867676	0.77684	embryo development ending in seed dormancy [GO:0009793];formation of cytoplasmic translation initiation complex [GO:0001732];pollen germination [GO:0009846];response to sucrose [GO:0009744];translational initiation [GO:0006413]	cytoplasm [GO:0005737];cytosol [GO:0005829];eukaryotic 43S preinitiation complex [GO:0016282];eukaryotic 48S preinitiation complex [GO:0033290];eukaryotic translation initiation factor 3 complex, eIF3m [GO:0071541];Golgi apparatus [GO:0005794];nucleus [GO:0005634]	translation initiation factor activity [GO:0003743];translation initiation factor binding [GO:0031369]	+	18	18	18	85.7	85.7	85.7	31.862	0	323.31	38445000000	175	4329500000	4507800000	3515500000	3576800000	5305500000	5196800000	5381200000	5428900000	81414000	75685000	81858000	98422000	54136000	63796000	59750000	54144000	90260000	57849000	81051000
1.28447	1.35464	1.45077	0.850055	-0.697825	-1.1759	-0.43161	-0.477169	-1.21891	-1.1386	-1.19958	-0.914918	0.509837	0.592024	0.61425	0.598464	response to cold [GO:0009409];response to jasmonic acid [GO:0009753];response to wounding [GO:0009611];vegetative to reproductive phase transition of meristem [GO:0010228]	chloroplast [GO:0009507];cytosol [GO:0005829];nucleus [GO:0005634];plasmodesma [GO:0009506];vacuole [GO:0005773]	carbohydrate binding [GO:0030246]	+	44	44	43	98.7	98.7	98.7	48.496	0	323.31	75959000000	657	2728900000	2858200000	2444800000	2466200000	7868900000	6690900000	7468600000	7475100000	2956100000	2820800000	3094800000	2750700000	1276900000	1494200000	1716800000	1987500000	1948700000	1395100000	1920000000
-1.46919	0.674129	0.528735	1.19486	-1.00833	-0.964487	-0.806077	-1.05415	0.589836	1.23155	0.905373	1.78866	0.0333485	-0.74491	-0.702468	-0.196879	response to cold [GO:0009409]	cytosol [GO:0005829];nucleus [GO:0005634];plasmodesma [GO:0009506]	carbohydrate binding [GO:0030246];copper ion binding [GO:0005507]	+	54	54	54	59.1	59.1	59.1	72.473	0	323.31	110140000000	593	9070300000	10395000000	8555700000	7330400000	16578000000	18980000000	18016000000	17810000000	137920000	421280000	239630000	280540000	59617000	343470000	97938000	311110000	179920000	226510000	238620000
1.09023	1.16304	1.35563	1.24169	-1.08974	-0.978485	-1.34777	-0.176763	-0.0563948	-0.549919	0.204728	1.70997	-0.383019	-0.705368	-0.937415	-0.54041	protein folding [GO:0006457];regulation of hydrolase activity [GO:0051336]	cytosol [GO:0005829];nucleus [GO:0005634];plasmodesma [GO:0009506]	carbohydrate binding [GO:0030246];copper ion binding [GO:0005507];enzyme regulator activity [GO:0030234]	+	44	44	34	99.7	99.7	84.9	32.158	0	323.31	291210000000	759	21478000000	23370000000	19607000000	19851000000	51471000000	48729000000	52633000000	47036000000	886030000	689500000	820620000	754400000	151680000	180360000	145120000	277870000	505280000	180810000	538030000
0.614651	0.262992	0.601082	-0.365554	-0.831174	-1.33516	-1.70805	-1.06702	1.06303	1.68753	1.01046	1.37838	-0.178118	-0.126002	-0.309613	-0.697434	glucosinolate catabolic process [GO:0019762];nitrile biosynthetic process [GO:0080028]	cytosol [GO:0005829];nucleus [GO:0005634];plasmodesma [GO:0009506]	carbohydrate binding [GO:0030246];enzyme regulator activity [GO:0030234]	+	68	68	36	87.4	87.4	47.8	67.603	0	323.31	377270000000	981	33349000000	34332000000	28763000000	27168000000	58446000000	51232000000	57240000000	56665000000	2335700000	2038000000	2373700000	1685000000	1245700000	1288600000	1266500000	1365900000	2323800000	1742500000	2426300000
-1.06704	-0.565303	-0.492328	-0.163098	0.223274	1.22993	0.954914	0.706035	-1.06234	1.72243	-0.058473	1.07331	-1.93887	-0.240808	-0.929016	0.607389	auxin metabolic process [GO:0009850];response to wounding [GO:0009611]	endoplasmic reticulum [GO:0005783];endoplasmic reticulum lumen [GO:0005788];nucleus [GO:0005634];plasma membrane [GO:0005886]	hydrolase activity [GO:0016787];IAA-Ala conjugate hydrolase activity [GO:0010179];metal ion binding [GO:0046872]	+	28	28	28	59.3	59.3	59.3	48.263	0	312.95	19594000000	277	1815000000	2404100000	1202400000	1503600000	1779700000	1761200000	1674300000	1985300000	373550000	346090000	420550000	364500000	212110000	314270000	338310000	314020000	294950000	204180000	411210000
-0.904371	-2.05499	-0.702859	0.50238	1.35933	0.53271	0.0765571	-0.117543	1.16234	0.414083	1.68439	-0.102886	-0.723598	-0.959283	0.702237	-0.868492	brassinosteroid mediated signaling pathway [GO:0009742];megasporogenesis [GO:0009554];meiotic sister chromatid cohesion [GO:0051177];microsporogenesis [GO:0009556];protein dephosphorylation [GO:0006470];regulation of protein autophosphorylation [GO:0031952]	cytoplasm [GO:0005737];cytosol [GO:0005829];nucleus [GO:0005634];protein phosphatase type 2A complex [GO:0000159]	protein phosphatase activator activity [GO:0072542]	+	11	11	4	19	19	10.4	57.471	0	11.399	2855100000	56	197840000	188160000	158750000	162860000	239120000	224140000	230770000	234730000	92985000	61296000	98674000	67698000	54045000	60829000	64727000	57799000	93011000	58340000	95977000
-0.419197	-1.72361	-0.391811	-0.335336	-1.57622	0.053278	0.135046	1.01321	-1.74322	0.588087	-0.128719	0.329405	0.86985	0.951199	1.02074	1.3573	adaxial/abaxial pattern specification [GO:0009955];adventitious root development [GO:0048830];auxin metabolic process [GO:0009850];cell differentiation [GO:0030154];defense response to virus [GO:0051607];gene silencing by miRNA [GO:0035195];innate immune response [GO:0045087];leaf morphogenesis [GO:0009965];leaf proximal/distal pattern formation [GO:0010589];leaf vascular tissue pattern formation…	cytoplasm [GO:0005737];cytosol [GO:0005829];nucleus [GO:0005634]	endoribonuclease activity [GO:0004521];metal ion binding [GO:0046872];miRNA binding [GO:0035198];mRNA binding [GO:0003729]	+	37	37	37	35.3	35.3	35.3	116.19	0	111.99	15933000000	279	601340000	680630000	614930000	555200000	1166700000	1227000000	1196600000	1207100000	431200000	463930000	577750000	606380000	352530000	431870000	451300000	604080000	462620000	367680000	545580000
1.60956	1.38238	1.30274	1.15017	-1.81965	-0.61741	-0.652797	-0.282781	-1.10917	-0.675199	-0.949713	-0.506688	0.108077	0.23077	0.528729	0.300994	peroxisome organization [GO:0007031];purine nucleobase metabolic process [GO:0006144];urate catabolic process [GO:0019628]	cytosol [GO:0005829];peroxisome [GO:0005777]	urate oxidase activity [GO:0004846]	+	29	29	29	65.4	65.4	65.4	34.88	0	211.36	14843000000	266	1340800000	1491900000	1107500000	1127300000	1404300000	1262100000	1294200000	1142300000	461560000	451520000	520030000	452460000	125320000	201050000	181340000	202270000	143590000	120870000	164150000
-0.415732	-1.20626	-0.201739	-0.518741	0.318059	0.560413	0.703314	0.35563	1.11404	1.12353	1.46117	1.34741	-1.2616	-0.812266	-1.39602	-1.17121	protein folding [GO:0006457]	chaperonin-containing T-complex [GO:0005832];cytosol [GO:0005829];nucleus [GO:0005634];plasma membrane [GO:0005886];plasmodesma [GO:0009506]	ATP binding [GO:0005524];unfolded protein binding [GO:0051082]	+	60	60	60	88	88	88	59.384	0	323.31	53403000000	473	3516700000	4658600000	3003800000	3513900000	7174500000	7228900000	6991500000	6330200000	772790000	653550000	720410000	575900000	649910000	738280000	646600000	624440000	966350000	512590000	916580000
0.644771	0.0166192	0.671979	-0.157837	-1.45389	-0.167022	-1.11545	-0.484036	2.37334	-0.689552	1.02889	1.26478	-0.941435	-0.837986	-0.322122	0.168954		cytosol [GO:0005829];extracellular region [GO:0005576];plasma membrane [GO:0005886];plasmodesma [GO:0009506];vacuole [GO:0005773]	translation elongation factor activity [GO:0003746]	+	55	29	29	68.6	34.8	34.8	46.66	0	323.31	133640000000	880	5939300000	6066400000	4857300000	4711400000	9127900000	10341000000	8239400000	9284100000	5551700000	4787700000	5432900000	4402100000	3558600000	3473200000	4048000000	4001900000	6110200000	4239600000	5538500000
-1.21608	0.00284948	-1.95155	-1.29785	0.744337	0.401963	-0.0575986	-0.0619238	-1.1339	1.2361	0.844492	0.937308	-0.870363	1.07255	0.473189	0.876477	leaf proximal/distal pattern formation [GO:0010589];leaf vascular tissue pattern formation [GO:0010305];mRNA cleavage involved in gene silencing by miRNA [GO:0035279];pre-miRNA processing [GO:0031054];primary miRNA processing [GO:0031053];production of miRNAs involved in gene silencing by miRNA [GO:0035196];production of siRNA involved in RNA interference [GO:0030422];production of ta-siRNAs invo…	nuclear dicing body [GO:0010445];nuclear speck [GO:0016607];nucleus [GO:0005634]	double-stranded RNA binding [GO:0003725];identical protein binding [GO:0042802];miRNA binding [GO:0035198];ribonuclease III activity [GO:0004525]	+	2	2	2	16	16	16	45.546	0	5.1712	435280000	10	18539000	35084000	27629000	32651000	41882000	53426000	49115000	49492000	0	0	0	0	6268300	5657400	4226200	4261600	0	17821000	19520000
1.0382	1.5633	1.53432	1.73806	-0.644092	-0.56102	-0.383596	-0.208178	-1.46951	-1.09682	-1.2165	-0.563299	0.0449527	0.13056	0.0437172	0.049895	protein catabolic process [GO:0030163];proteolysis [GO:0006508];regulation of programmed cell death [GO:0043067];systemic acquired resistance [GO:0009627]	apoplast [GO:0048046];cell wall [GO:0005618];secretory vesicle [GO:0099503]	aspartic-type endopeptidase activity [GO:0004190];nucleotide binding [GO:0000166]	+	20	20	20	38.8	38.8	38.8	47.661	0	323.31	193030000000	481	127090000	216490000	140380000	207560000	387600000	456960000	334880000	414730000	16089000000	15876000000	17269000000	17188000000	5924400000	8756100000	10070000000	10241000000	9289900000	6683200000	10209000000
-0.287586	-0.343916	-1.53758	-1.97445	-0.226691	0.281888	0.635347	0.753601	1.58574	0.256281	1.33464	1.31769	-0.08077	-0.950841	-0.122683	-0.640668	cellular carbohydrate metabolic process [GO:0044262];glucose catabolic process [GO:0006007];glycolytic process [GO:0006096];pollen development [GO:0009555];response to cadmium ion [GO:0046686];response to cold [GO:0009409];stomatal movement [GO:0010118]	chloroplast [GO:0009507];cytosol [GO:0005829];extracellular region [GO:0005576];mitochondrial envelope [GO:0005740];plasma membrane [GO:0005886];plasmodesma [GO:0009506]	2,3-bisphosphoglycerate-independent phosphoglycerate mutase activity [GO:0046537];manganese ion binding [GO:0030145]	+	86	86	64	98.6	98.6	88.7	60.579	0	323.31	568080000000	2488	37545000000	42136000000	35122000000	35115000000	46567000000	48100000000	41671000000	44070000000	14536000000	14518000000	14720000000	13393000000	11418000000	13321000000	14124000000	14735000000	16807000000	10769000000	17533000000
-0.397557	-0.511203	-0.151164	-0.0118986	0.719777	1.24598	0.816459	0.830361	-1.45395	-1.34759	-1.35823	-1.62101	0.770585	0.910555	0.566609	0.992277		cytosol [GO:0005829]		+	12	11	11	39	34.1	34.1	35.079	0	37.106	3230700000	64	53678000	40050000	44019000	24453000	204460000	281210000	254810000	220800000	108950000	68301000	84238000	67348000	122090000	198870000	217980000	144570000	50995000	25400000	48478000
1.12359	1.02388	1.06659	0.667738	0.7842	0.659437	-1.24195	0.942998	-0.234632	0.494713	-0.789764	-1.61339	-1.48082	-0.717794	0.417581	-1.10237	ribosomal large subunit assembly [GO:0000027];translation [GO:0006412]	chloroplast [GO:0009507];chloroplast envelope [GO:0009941];chloroplast stroma [GO:0009570];cytosol [GO:0005829];cytosolic ribosome [GO:0022626]	RNA binding [GO:0003723];rRNA binding [GO:0019843];structural constituent of ribosome [GO:0003735]	+	4	4	4	13.4	13.4	13.4	28.343	0.00094162	2.4944	467490000	8	23140000	22276000	65792000	19489000	23467000	27845000	27595000	0	21338000	53200000	54775000	47445000	21431000	26566000	0	22225000	0	4900700	0
-1.35072	-1.65241	-1.63922	-1.82783	0.378458	0.255754	0.447833	0.420734	0.791761	1.07165	0.907704	0.888289	0.254447	0.423529	0.31736	0.312658		Golgi apparatus [GO:0005794];integral component of membrane [GO:0016021]	O-acetyltransferase activity [GO:0016413]	+	12	12	12	34.8	34.8	34.8	50.687	0	61.226	2615500000	65	0	0	0	0	0	0	0	0	33333000	41202000	32196000	15514000	153790000	180960000	144650000	170970000	346340000	225450000	377640000
-1.31095	-1.47266	-0.955244	-0.672409	0.884248	0.803032	1.02265	0.764351	-0.91015	0.274228	-1.33895	-0.68803	0.480845	0.964379	1.21702	0.937629	threonyl-tRNA aminoacylation [GO:0006435];tRNA aminoacylation for protein translation [GO:0006418]	cell wall [GO:0005618];chloroplast [GO:0009507];cytosol [GO:0005829];mitochondrion [GO:0005739];plasma membrane [GO:0005886];plastid [GO:0009536]	aminoacyl-tRNA ligase activity [GO:0004812];ATP binding [GO:0005524];metal ion binding [GO:0046872];threonine-tRNA ligase activity [GO:0004829]	+	82	82	82	83.9	83.9	83.9	80.935	0	323.31	58659000000	813	3637500000	3621400000	2844300000	2849400000	4880500000	5468300000	4923900000	4790100000	1536000000	1307200000	1685500000	1344400000	1187400000	1376200000	1749100000	1707300000	1605300000	1073600000	1387000000
-0.704422	-1.3231	-1.51614	-2.58042	0.189511	0.438911	0.211743	0.332076	0.862761	0.579242	0.721759	0.992346	0.358198	0.449795	0.429609	0.558135	one-carbon metabolic process [GO:0006730]	chloroplast stroma [GO:0009570];endoplasmic reticulum [GO:0005783]	carbonate dehydratase activity [GO:0004089];hydro-lyase activity [GO:0016836];zinc ion binding [GO:0008270]	+	9	9	9	30.6	30.6	30.6	32.697	0	18.158	2334200000	50	5114700	0	3178600	0	0	0	0	0	32399000	11006000	4583000	0	161790000	85152000	151810000	141430000	244330000	233940000	212020000
1.44965	1.86262	1.1406	0.922909	-1.654	-0.876538	-0.518309	-0.651314	-0.857287	-1.01894	-0.514882	-0.635497	0.199336	0.146568	0.691124	0.313967	'de novo' pyrimidine nucleobase biosynthetic process [GO:0006207];'de novo' UMP biosynthetic process [GO:0044205];pyrimidine nucleotide biosynthetic process [GO:0006221]	chloroplast [GO:0009507];cytoplasm [GO:0005737];cytosol [GO:0005829];mitochondrion [GO:0005739]	dihydroorotase activity [GO:0004151];metal ion binding [GO:0046872]	+	24	24	24	72.4	72.4	72.4	41.949	0	206.8	27507000000	300	1113500000	1176100000	973130000	899090000	931920000	884810000	800120000	842510000	1514300000	1716500000	1637700000	1616600000	387500000	563650000	706160000	601140000	1176600000	386490000	1316900000
1.58878	1.88162	1.19244	1.45137	-0.940039	-0.559633	-0.143582	0.127065	-0.0617651	-1.34794	-0.0861031	-0.776942	-0.584335	-0.096015	-0.684806	-0.960114	CDP biosynthetic process [GO:0046705];'de novo' pyrimidine nucleobase biosynthetic process [GO:0006207];purine nucleotide metabolic process [GO:0006163];pyrimidine nucleotide biosynthetic process [GO:0006221];pyrimidine ribonucleoside monophosphate metabolic process [GO:0009173];UDP biosynthetic process [GO:0006225]	cytoplasm [GO:0005737];cytosol [GO:0005829];nucleus [GO:0005634];plastid [GO:0009536]	ATP binding [GO:0005524];cytidylate kinase activity [GO:0004127];UMP kinase activity [GO:0033862];uridylate kinase activity [GO:0009041]	+	25	25	24	87.1	87.1	87.1	22.481	0	129.22	21983000000	243	1519800000	1729300000	1321800000	1269900000	2403700000	2280700000	2502800000	2462000000	556600000	570390000	752700000	627420000	277180000	274350000	369610000	265760000	443450000	248130000	422950000
1.42512	1.51066	1.17605	0.564269	-1.07698	-1.23114	-1.41985	-1.18449	0.420877	1.16845	-0.0935217	0.0283781	-0.0438182	0.0133614	-0.106038	-1.15133	response to oxidative stress [GO:0006979]	cytosol [GO:0005829];nucleus [GO:0005634];peroxisome [GO:0005777];plasma membrane [GO:0005886]	glutathione peroxidase activity [GO:0004602];peroxidase activity [GO:0004601]	+	31	29	29	97	97	97	18.944	0	229.77	21876000000	265	1877900000	1919500000	1566000000	1520200000	2096500000	2567800000	2588300000	2790300000	439270000	443850000	404550000	322120000	189540000	223310000	234600000	191850000	337370000	311430000	303650000
1.38099	1.7863	0.720947	0.776064	-1.72591	-1.06739	-1.43945	-1.39193	0.66455	-0.110626	0.1499	-0.199846	0.359576	-0.0095374	0.0762681	0.0300933	fatty acid biosynthetic process [GO:0006633];malonyl-CoA biosynthetic process [GO:2001295]	chloroplast [GO:0009507]	acetyl-CoA carboxylase activity [GO:0003989];ATP binding [GO:0005524];biotin carboxylase activity [GO:0004075];metal ion binding [GO:0046872]	+	53	53	53	77.8	77.8	77.8	58.386	0	323.31	128670000000	991	7842500000	8568700000	6864900000	6536800000	9698600000	8599000000	9458600000	9797200000	5213400000	4955700000	4677700000	4282600000	2048000000	2646700000	2878200000	2975500000	4443700000	2514900000	3993600000
0.424557	1.04724	-0.414395	-1.78016	-1.4623	-0.359312	-0.864478	-0.0537717	0.221427	-1.4784	0.247545	0.418583	0.992627	0.303098	1.29585	1.46188		anchored component of membrane [GO:0031225];anchored component of plasma membrane [GO:0046658];apoplast [GO:0048046];cytosol [GO:0005829];plasma membrane [GO:0005886];secretory vesicle [GO:0099503]		+	33	33	30	50.7	50.7	48.8	43.074	0	323.31	192250000000	811	1921200000	2110300000	1679000000	1790600000	3197000000	3160100000	3292400000	2927900000	11510000000	11081000000	12051000000	9421800000	7148600000	8742100000	8973000000	9534400000	11348000000	7759800000	11813000000
1.39335	1.42089	1.36893	1.34893	-0.666466	-0.693834	-0.945774	-0.868098	0.398682	0.449391	0.375312	0.440232	-1.02671	-1.14477	-0.945543	-0.904521	cell wall modification [GO:0042545];defense response to Gram-negative bacterium [GO:0050829];pectin catabolic process [GO:0045490];response to bacterium [GO:0009617];response to fungus [GO:0009620]	cell wall [GO:0005618];extracellular region [GO:0005576]	aspartyl esterase activity [GO:0045330];pectinesterase activity [GO:0030599];pectinesterase inhibitor activity [GO:0046910]	+	26	26	25	56.9	56.9	55.8	55.976	0	323.31	28370000000	183	424980000	338890000	262560000	315500000	336840000	338310000	281090000	333180000	6194600000	5639300000	6240900000	5039200000	41280000	38263000	51450000	28507000	531950000	534840000	626210000
-0.544415	-0.695126	0.0958765	-0.140682	0.464853	0.543964	-0.194312	-0.0192175	1.1133	1.5947	1.43777	1.24888	-1.03826	-1.46284	-1.45044	-0.954066	regulation of translation [GO:0006417];response to cadmium ion [GO:0046686];viral process [GO:0016032]	cytoplasm [GO:0005737];cytosol [GO:0005829];nucleus [GO:0005634];ribonucleoprotein complex [GO:1990904];vacuole [GO:0005773]	mRNA 3'-UTR binding [GO:0003730];mRNA binding [GO:0003729];poly(A) binding [GO:0008143];poly(U) RNA binding [GO:0008266];RNA binding [GO:0003723]	+	65	65	60	66.2	66.2	64.8	71.652	0	323.31	107580000000	939	5729900000	5564200000	4594000000	4334200000	6724500000	7452400000	7286900000	7584400000	3835100000	3182700000	3629200000	3291600000	2843400000	5411600000	2954800000	3321000000	4245100000	3400100000	4532100000
-0.563491	-0.672362	-1.58979	-0.386835	1.84891	0.758151	0.0792172	0.740525	0.0176218	1.38361	0.117314	0.574003	0.588443	-0.393751	-0.503356	-1.99821	protein autophosphorylation [GO:0046777]	integral component of membrane [GO:0016021];plasma membrane [GO:0005886];plasmodesma [GO:0009506];vacuole [GO:0005773]	ATP binding [GO:0005524];protein kinase activity [GO:0004672];protein serine/threonine kinase activity [GO:0004674]	+	5	4	4	5.6	4.6	4.6	93.378	0.00057176	2.6999	643840000	37	0	0	0	0	0	0	0	0	34503000	34972000	35579000	39274000	41737000	43465000	38515000	48408000	35161000	43064000	44139000
-2.26147	-1.04534	-1.50496	-0.738954	1.10228	-0.174516	1.02134	0.662565	0.232369	0.477704	-0.656192	1.30806	0.0134943	0.582324	0.420211	0.561087	coumarin biosynthetic process [GO:0009805];flavonoid biosynthetic process [GO:0009813];lignin biosynthetic process [GO:0009809];phenylpropanoid biosynthetic process [GO:0009699]	cytosol [GO:0005829];endoplasmic reticulum [GO:0005783];integral component of membrane [GO:0016021];intracellular membrane-bounded organelle [GO:0043231];membrane [GO:0016020];mitochondrion [GO:0005739];plasma membrane [GO:0005886]	heme binding [GO:0020037];identical protein binding [GO:0042802];iron ion binding [GO:0005506];monooxygenase activity [GO:0004497];oxidoreductase activity, acting on paired donors, with incorporation or reduction of molecular oxygen, NAD(P)H as one donor, and incorporation of one atom of oxygen [GO:0016709];p-coumarate 3-hydroxylase activity [GO:0046409]	+	7	7	7	12	12	12	57.926	0	7.6626	1210600000	40	76767000	84721000	60222000	73234000	84922000	47342000	85086000	79000000	25385000	29424000	31941000	33251000	31953000	40605000	42800000	40988000	52499000	35138000	44218000
0.886614	0.674108	2.20569	1.21488	-0.820993	-0.606069	-0.406165	-0.317869	-0.328425	-2.10205	-0.197354	-1.00159	-0.254994	0.554364	0.400312	0.0995328	cell redox homeostasis [GO:0045454];hydrogen peroxide catabolic process [GO:0042744];positive regulation of catalytic activity [GO:0043085];regulation of chlorophyll biosynthetic process [GO:0010380];regulation of starch biosynthetic process [GO:0010581];removal of superoxide radicals [GO:0019430]	chloroplast [GO:0009507];chloroplast stroma [GO:0009570];cytosol [GO:0005829]	enzyme activator activity [GO:0008047];identical protein binding [GO:0042802];oxidoreductase activity, acting on a sulfur group of donors, disulfide as acceptor [GO:0016671];thioredoxin-disulfide reductase activity [GO:0004791]	+	33	33	33	52.2	52.2	52.2	57.949	0	323.31	85369000000	459	241510000	202810000	1185500000	350750000	209130000	282470000	162920000	204230000	5933300000	5463000000	7174600000	6202200000	3921300000	4148800000	4887200000	4704100000	4701700000	3019000000	4889000000
-1.14917	-0.37738	-1.34484	-1.66965	1.27827	1.80486	0.849041	1.60769	-0.269856	-0.125756	-0.489029	-0.459918	0.204265	-0.03824	-0.179367	0.359087	cell redox homeostasis [GO:0045454];double fertilization forming a zygote and endosperm [GO:0009567];embryo development ending in seed dormancy [GO:0009793];embryo sac development [GO:0009553];pollen tube development [GO:0048868];response to cadmium ion [GO:0046686];response to endoplasmic reticulum stress [GO:0034976]	cytosol [GO:0005829];endoplasmic reticulum [GO:0005783];plant-type cell wall [GO:0009505];secretory vesicle [GO:0099503];vacuolar membrane [GO:0005774]	protein disulfide isomerase activity [GO:0003756]	+	57	57	56	86.1	86.1	86.1	39.496	0	323.31	91540000000	829	2457100000	2712100000	2106400000	2389100000	5748800000	6944200000	6301700000	6636100000	2983800000	3466500000	3424000000	2930100000	2960900000	3775600000	3531300000	3764900000	3706800000	2591800000	3567600000
-1.67621	-0.597342	-1.56855	-0.437336	0.999437	0.825775	-0.0144622	-0.550321	0.652848	1.72997	0.298574	0.582348	0.971293	-1.1815	-0.728181	0.693662	protein heterotrimerization [GO:0070208];protein import into chloroplast thylakoid membrane [GO:0045038];response to high light intensity [GO:0009644]	chloroplast [GO:0009507];chloroplast envelope [GO:0009941];chloroplast stroma [GO:0009570];chloroplast thylakoid membrane [GO:0009535];cytosol [GO:0005829];protein-containing complex [GO:0032991];signal recognition particle, chloroplast targeting [GO:0080085];signal recognition particle, endoplasmic reticulum targeting [GO:0005786]	disordered domain specific binding [GO:0097718];identical protein binding [GO:0042802];metal ion binding [GO:0046872];protein domain specific binding [GO:0019904];protein-macromolecule adaptor activity [GO:0030674]	+	12	12	12	33.2	33.2	33.2	41.279	0	27.03	5237300000	89	32014000	28117000	0	22795000	19090000	50958000	55730000	35977000	185660000	236020000	158050000	254700000	282820000	319860000	281140000	326760000	365810000	377060000	296320000
-0.606816	-0.755316	-0.501033	-0.369278	0.241109	0.606881	0.810624	0.481093	-1.07245	-1.16687	-1.38658	-1.28117	1.35816	1.20199	1.3141	1.12556	cellulose biosynthetic process [GO:0030244];defense response to bacterium [GO:0042742];GDP-mannose biosynthetic process [GO:0009298];L-ascorbic acid biosynthetic process [GO:0019853];response to ammonium ion [GO:0060359];response to heat [GO:0009408];response to jasmonic acid [GO:0009753];response to ozone [GO:0010193];response to salt stress [GO:0009651]	cytosol [GO:0005829];nucleus [GO:0005634]	GTP binding [GO:0005525];mannose-1-phosphate guanylyltransferase activity [GO:0004475]	+	34	34	34	76.5	76.5	76.5	39.577	0	179.85	28808000000	336	1987600000	2625300000	2096000000	2013900000	2580100000	2694300000	2395200000	2601500000	519760000	479060000	547260000	544080000	480100000	643260000	613920000	653410000	332680000	238790000	320960000
0.976632	0.77669	0.770005	1.08165	0.219829	-1.25635	-0.245067	0.272119	0.221799	-0.48931	0.329569	0.812727	0.63576	-0.828004	-2.73421	-0.543841	mRNA cis splicing, via spliceosome [GO:0045292];regulation of alternative mRNA splicing, via spliceosome [GO:0000381]	interchromatin granule [GO:0035061];nuclear speck [GO:0016607];nucleus [GO:0005634];spliceosomal complex [GO:0005681]	mRNA binding [GO:0003729];RNA binding [GO:0003723]	+	18	15	15	44.9	42.2	42.2	33.729	0	45.224	11055000000	77	1190100000	1115300000	788440000	1044200000	1606200000	1684600000	1267700000	1513800000	111460000	131890000	89236000	124850000	27777000	0	19243000	35861000	38429000	11477000	49884000
0.0983135	0.100804	0.602894	0.644041	-0.0799052	-0.0113373	0.805203	-0.343029	-1.00267	-1.56137	-1.93135	-1.37681	0.736748	1.11515	1.37256	0.830758	chromatin organization [GO:0006325]	Cul4-RING E3 ubiquitin ligase complex [GO:0080008];cytosol [GO:0005829];nucleus [GO:0005634]		+	14	14	11	46.5	46.5	38.3	46.703	0	41.851	7632300000	138	671990000	759530000	703000000	521920000	505280000	853720000	695000000	866630000	133280000	113430000	131400000	170690000	216250000	79189000	118480000	79550000	81024000	60023000	50501000
0.0702215	0.335211	0.28396	0.409799	-0.133675	1.19866	0.724909	-0.0600286	-0.813689	-3.07645	-1.026	0.284432	0.755067	0.864387	-0.0758738	0.259073	chloroplast organization [GO:0009658]	cytosol [GO:0005829]	ATP binding [GO:0005524];protein kinase activity [GO:0004672];protein serine/threonine kinase activity [GO:0004674];protein serine/threonine/tyrosine kinase activity [GO:0004712]	+	17	13	12	34.1	26.4	24.7	61.509	0	34.219	3765900000	87	378840000	392910000	327030000	337990000	341170000	374590000	457680000	398450000	47266000	53553000	56324000	67067000	28518000	52984000	35756000	20786000	49645000	23829000	46873000
-0.847417	-0.683615	-0.204571	-0.32361	-0.830608	-1.55058	0.546629	0.835675	0.177981	-1.89943	-0.313623	0.333699	1.11738	1.30261	1.01898	1.3205	photosystem II repair [GO:0010206];protein catabolic process [GO:0030163]	chloroplast [GO:0009507];chloroplast thylakoid [GO:0009534];chloroplast thylakoid membrane [GO:0009535];cytosol [GO:0005829];nucleus [GO:0005634];thylakoid [GO:0009579];thylakoid lumen [GO:0031977]	identical protein binding [GO:0042802];serine-type endopeptidase activity [GO:0004252];serine-type peptidase activity [GO:0008236]	+	16	16	16	48.1	48.1	48.1	46.673	0	57.619	4503200000	110	21284000	0	31821000	0	0	0	5634000	0	228020000	281760000	227700000	212780000	107490000	158860000	254360000	247650000	243720000	103000000	234850000
0.530012	0.23966	1.17206	1.08134	-0.79587	-0.37168	-0.7797	-0.90107	0.729337	1.24141	1.43474	0.711676	-1.67743	-0.811853	-1.21085	-0.591773	cysteine biosynthetic process from serine [GO:0006535];photosynthesis [GO:0015979];photosynthetic acclimation [GO:0009643];regulation of hydrogen peroxide metabolic process [GO:0010310];regulation of superoxide metabolic process [GO:0090322]	chloroplast [GO:0009507];chloroplast thylakoid lumen [GO:0009543];cytoplasm [GO:0005737];thylakoid lumen [GO:0031977]	cysteine synthase activity [GO:0004124];pyridoxal phosphate binding [GO:0030170]	+	12	12	12	31.2	31.2	31.2	43.16	0	45.156	3053400000	90	0	0	0	0	0	0	0	0	257300000	178890000	310730000	337250000	112730000	92384000	91903000	118840000	276160000	177990000	303990000
0.996804	1.23347	0.580281	1.36914	-0.906678	-1.20646	-0.676701	-1.09982	0.9375	0.591719	1.05911	0.300028	-0.849305	0.17429	-1.21527	-1.28809	cyanate catabolic process [GO:0009440];response to salt stress [GO:0009651]	cytosol [GO:0005829]	cyanate hydratase activity [GO:0008824];DNA binding [GO:0003677];identical protein binding [GO:0042802]	+	14	14	14	70.2	70.2	70.2	18.592	0	282.35	25162000000	204	1191600000	1221000000	1071200000	967720000	1341400000	1134200000	1061900000	1300000000	1195300000	1105400000	1525900000	1538500000	681600000	653880000	668760000	715580000	1084200000	883850000	1067000000
-0.156751	-1.34493	-0.512731	-1.6521	1.78282	-0.0767032	-0.417493	-0.563471	0.11568	0.567367	-1.27046	-0.350042	1.30698	0.512539	0.620359	1.43893	auxin biosynthetic process [GO:0009851];tryptophan biosynthetic process [GO:0000162]	chloroplast [GO:0009507];cytoplasm [GO:0005737];cytosol [GO:0005829]	indole-3-glycerol-phosphate lyase activity [GO:0033984];tryptophan synthase activity [GO:0004834]	+	8	7	7	40.7	35.3	35.3	29.579	0	19.509	1629300000	31	34585000	23026000	49720000	37846000	19059000	94987000	73152000	31684000	53054000	37628000	82559000	43875000	100630000	71059000	64627000	55629000	57035000	84458000	86218000
-1.39044	-1.77254	-1.24895	1.83509	-0.630332	-0.554965	-0.476827	-0.493345	0.672368	0.120861	0.5664	0.279337	0.569273	1.28373	0.947671	0.292671	photosystem II repair [GO:0010206]	chloroplast [GO:0009507];chloroplast envelope [GO:0009941];chloroplast stroma [GO:0009570];chloroplast thylakoid [GO:0009534];chloroplast thylakoid lumen [GO:0009543];chloroplast thylakoid membrane [GO:0009535];cytosol [GO:0005829];thylakoid [GO:0009579];thylakoid lumen [GO:0031977]		+	3	3	3	19.9	19.9	19.9	23.663	0	17.897	763250000	27	0	0	0	0	0	0	0	0	42399000	37690000	17425000	31293000	34735000	34025000	44918000	17639000	52420000	31785000	64882000
1.29055	0.995906	0.555083	1.73542	-0.399441	-0.346791	0.227102	-1.54662	-0.608843	1.46618	-0.391365	-1.29347	-0.858379	-0.861217	-0.468714	0.50458	plasmodesmata-mediated intercellular transport [GO:0010497];transport of virus in multicellular host [GO:0046739]	integral component of membrane [GO:0016021];plasma membrane [GO:0005886];plasmodesma [GO:0009506]		+	2	2	2	8.2	8.2	8.2	32.658	0	15.287	309390000	5	0	0	0	0	0	0	0	0	35125000	28955000	29093000	29390000	16305000	16944000	8845800	21999000	18673000	11224000	20182000
-0.947569	-1.97494	-1.68805	-1.33091	0.285229	0.543529	0.251071	0.245479	1.65104	0.241019	0.896678	0.659185	0.96066	0.198381	0.223655	-0.214456	defense response to bacterium [GO:0042742];DNA repair [GO:0006281];generation of catalytic spliceosome for first transesterification step [GO:0000349];innate immune response [GO:0045087];protein K63-linked ubiquitination [GO:0070534]	catalytic step 2 spliceosome [GO:0071013];cell wall [GO:0005618];Cul4-RING E3 ubiquitin ligase complex [GO:0080008];endoplasmic reticulum [GO:0005783];nucleus [GO:0005634];Prp19 complex [GO:0000974];U2-type catalytic step 1 spliceosome [GO:0071006]	ubiquitin protein ligase activity [GO:0061630];ubiquitin-protein transferase activity [GO:0004842]	+	30	30	27	66.3	66.3	60	56.727	0	323.31	21171000000	292	1704600000	1765800000	1273800000	1333000000	2554000000	1979000000	2023900000	1643900000	377740000	332950000	390850000	379770000	346990000	477380000	292300000	441530000	665080000	301250000	707180000
1.40059	1.59868	1.83963	1.68325	-0.779532	-0.527183	-0.862973	-0.810747	-0.469834	-0.258237	-0.457391	-0.0321501	-0.436283	-0.881546	-0.557741	-0.448529	cytidine to uridine editing [GO:0016554];endonucleolytic cleavage of tetracistronic rRNA transcript (SSU-rRNA, LSU-rRNA, 4.5S-rRNA, 5S-rRNA) [GO:0002103];mitochondrial mRNA modification [GO:0080156];mRNA processing [GO:0006397];plastid organization [GO:0009657]	chloroplast [GO:0009507];endoplasmic reticulum [GO:0005783];mitochondrion [GO:0005739]	protein dimerization activity [GO:0046983];protein homodimerization activity [GO:0042803]	+	4	3	3	15.5	15.5	15.5	24.715	0	13.939	533080000	10	3250500	0	0	0	3598300	4095500	10599000	0	74078000	60250000	85418000	55832000	16223000	22728000	9808300	9828700	35068000	26354000	25081000
-1.45883	-1.37396	-1.59725	-0.720531	0.188628	-0.575684	-0.444903	-0.575232	0.456525	0.0735239	0.407135	0.773219	1.08267	1.15736	1.04896	1.55835	ceramide transport [GO:0035627];intermembrane lipid transfer [GO:0120009]	cytosol [GO:0005829];membrane [GO:0016020];plasma membrane [GO:0005886]	ceramide 1-phosphate binding [GO:1902387];ceramide 1-phosphate transfer activity [GO:1902388];lipid binding [GO:0008289]	+	17	17	17	61.4	61.4	61.4	22.74	0	76.951	5656800000	93	335670000	439220000	355210000	244300000	808700000	930260000	644660000	718950000	67303000	52008000	54035000	47396000	54517000	84991000	30263000	61599000	85611000	37853000	82789000
-1.77491	-1.6323	-0.326864	-0.318818	-1.41716	-0.953976	0.388447	-0.162194	1.06249	0.103881	1.02752	1.10621	0.581419	1.18478	0.365504	0.76597	cellular response to hypoxia [GO:0071456];response to abscisic acid [GO:0009737];response to cadmium ion [GO:0046686];response to heat [GO:0009408];response to water deprivation [GO:0009414]		oxidoreductase activity [GO:0016491];oxidoreductase activity, acting on the CH-OH group of donors, NAD or NADP as acceptor [GO:0016616]	+	18	18	10	43.3	43.3	26.8	35.875	0	81.043	13139000000	219	353850000	387480000	309530000	349840000	443270000	440400000	371760000	390210000	427790000	466360000	606470000	594680000	357220000	409910000	564160000	579420000	816140000	449150000	902910000
-1.15955	-2.32085	0.271657	-0.54716	1.67729	0.975521	0.942493	0.377637	0.5096	-0.650908	-0.130637	-0.0729242	0.779892	-0.796477	0.827617	-0.683202			oxidoreductase activity [GO:0016491];oxidoreductase activity, acting on the CH-OH group of donors, NAD or NADP as acceptor [GO:0016616]	+	16	8	8	45.8	29.9	29.9	35.614	0	14.465	1741800000	58	26566000	20416000	24764000	34009000	47163000	40719000	53340000	39632000	101000000	81305000	111120000	63790000	110510000	98075000	66919000	92131000	98692000	63603000	91480000
0.940874	1.06086	1.20976	1.13068	-1.0042	-0.877129	-1.02247	-0.761687	0.864125	0.64229	0.823798	0.989424	-1.11982	-0.873482	-1.04679	-0.956234	benzoate metabolic process [GO:0018874];para-aminobenzoic acid metabolic process [GO:0046482];positive regulation of seed germination [GO:0010030];salicylic acid metabolic process [GO:0009696]	cytosol [GO:0005829];intracellular membrane-bounded organelle [GO:0043231]	benzoic acid glucosyltransferase activity [GO:0052641];nicotinate-O-glucosyltransferase activity [GO:0090704];quercetin 3-O-glucosyltransferase activity [GO:0080043];quercetin 7-O-glucosyltransferase activity [GO:0080044];salicylic acid glucosyltransferase (ester-forming) activity [GO:0052639];salicylic acid glucosyltransferase (glucoside-forming) activity [GO:0052640];UDP-glucose:4-aminobenzoate…	+	24	24	19	42.1	42.1	38.1	50.771	0	323.31	18988000000	278	1517000000	1076500000	1076200000	1003200000	1206800000	1408400000	1321800000	1347500000	966090000	842860000	1117200000	872400000	219320000	289630000	295140000	291050000	802840000	512660000	707460000
-1.06328	0.00101055	-1.63824	-0.748497	-1.53156	0.617196	-0.122479	1.38515	0.287736	0.0469288	-0.654503	-0.163742	-0.133799	0.723832	1.94453	1.04972	Mo-molybdopterin cofactor biosynthetic process [GO:0006777]	cytosol [GO:0005829];molybdopterin synthase complex [GO:0019008]	molybdopterin synthase activity [GO:0030366]	+	13	13	13	63.6	63.6	63.6	22.216	0	50.886	7966900000	151	568210000	471650000	255620000	327160000	533800000	568690000	483450000	460100000	255460000	224280000	373630000	329440000	157160000	282990000	226080000	363030000	270410000	181420000	243030000
-0.492466	-0.0247463	0.784239	-0.0236078	-1.50842	-1.48759	-1.0915	-0.921809	1.46111	0.789765	1.35992	1.47266	-0.0419028	0.556983	-0.119173	-0.713461	defense response [GO:0006952];fatty acid biosynthetic process [GO:0006633];fatty acid metabolic process [GO:0006631]	chloroplast stroma [GO:0009570]	acyl-[acyl-carrier-protein] desaturase activity [GO:0045300];metal ion binding [GO:0046872];stearoyl-[acp] desaturase activity [GO:0102786];stearoyl-CoA 9-desaturase activity [GO:0004768]	+	25	25	15	52.9	52.9	35.9	45.692	0	121.5	14768000000	189	368940000	490990000	254460000	181280000	425110000	463990000	448140000	527620000	652850000	680780000	927180000	719710000	461990000	386160000	563160000	548800000	881880000	612740000	993560000
1.31433	0.942259	1.74882	1.79277	-1.35649	-0.917308	-0.623084	-0.497251	0.42692	-0.278951	0.0559894	0.313266	-1.1303	-0.372672	-0.632717	-0.785578	cell wall macromolecule catabolic process [GO:0016998];chitin catabolic process [GO:0006032];defense response [GO:0006952];polysaccharide catabolic process [GO:0000272]	apoplast [GO:0048046];secretory vesicle [GO:0099503]	chitin binding [GO:0008061];chitinase activity [GO:0004568]	+	7	6	6	36	30.4	30.4	30.377	0	102.35	2014400000	40	0	0	0	0	0	0	0	0	217030000	197350000	307040000	282880000	30044000	31890000	83694000	79193000	164490000	49247000	146800000
-0.0886565	-0.217551	0.514483	0.190082	1.84512	0.546702	-0.403835	1.84716	-1.4302	0.582437	-1.97552	-0.742211	0.333526	-0.134647	-0.328223	-0.53867	plant-type cell wall organization [GO:0009664];syncytium formation [GO:0006949]	cell wall [GO:0005618];extracellular region [GO:0005576];membrane [GO:0016020]		+	3	3	2	16.2	16.2	12.6	27.26	0	16.361	2297400000	26	0	0	0	0	0	0	0	0	359500000	48825000	30709000	391610000	96643000	22418000	34154000	76816000	55843000	45557000	29398000
2.01645	1.37545	1.44099	0.194919	-0.617567	-0.567626	-0.707679	-1.09482	1.12598	-0.384969	0.265762	-0.18908	-0.0186054	-1.22594	-0.492343	-1.12093	chlorophyll biosynthetic process [GO:0015995];protoporphyrinogen IX biosynthetic process [GO:0006782]	chloroplast [GO:0009507];chloroplast envelope [GO:0009941];chloroplast stroma [GO:0009570];Golgi apparatus [GO:0005794]	uroporphyrinogen decarboxylase activity [GO:0004853]	+	34	34	34	69	69	69	43.579	0	323.31	107710000000	658	166520000	174490000	126750000	95125000	242780000	248620000	299730000	225440000	9504700000	8520300000	7668100000	6603800000	4685100000	5465000000	5997000000	5982800000	7486500000	4931700000	6947000000
-3.47636	-0.312864	-0.488638	0.238125	0.324961	-0.0743831	0.899445	0.813307	0.459959	0.471753	0.226588	-0.129269	0.0713197	0.360225	0.54593	0.0699026	mRNA processing [GO:0006397];RNA splicing [GO:0008380]	chloroplast envelope [GO:0009941];spliceosomal complex [GO:0005681]	ATP binding [GO:0005524];RNA binding [GO:0003723];RNA helicase activity [GO:0003724]	+	29	8	8	44.4	14	14	82.653	0	21.472	753420000	20	25558000	35448000	24229000	20055000	93696000	64824000	74146000	91749000	0	16349000	17266000	28170000	25976000	16164000	23942000	37290000	12079000	8725700	21189000
-0.866854	-2.89654	-0.575974	-0.267904	0.652625	-0.763023	-0.105396	-0.0498118	0.910859	0.433559	0.125311	1.30444	0.726408	0.503655	0.953886	-0.0852429		nucleus [GO:0005634]	ATP binding [GO:0005524];RNA binding [GO:0003723];RNA helicase activity [GO:0003724]	+	13	13	13	20.1	20.1	20.1	83.05	0	12.002	2528800000	59	219020000	176850000	117430000	126800000	107090000	161560000	149530000	125250000	58857000	18883000	74253000	83693000	63269000	95269000	82640000	100570000	104220000	45820000	64235000
-0.620579	-0.29243	-0.633365	-0.416745	-2.98817	-0.516929	-0.0324164	-0.333563	1.09407	0.671039	1.01157	0.866136	0.665873	0.448236	0.554669	0.52261	negative regulation of reductive pentose-phosphate cycle [GO:0080153];reductive pentose-phosphate cycle [GO:0019253];response to sucrose [GO:0009744]	chloroplast [GO:0009507];chloroplast envelope [GO:0009941];chloroplast stroma [GO:0009570];cytosol [GO:0005829];protein-containing complex [GO:0032991]	copper ion binding [GO:0005507];nickel cation binding [GO:0016151]	+	2	2	2	31.5	31.5	31.5	13.487	0	19.487	688430000	13	0	0	0	0	0	0	0	0	32922000	35510000	35039000	22903000	0	28951000	17853000	21348000	86935000	47491000	83314000
1.31457	1.56739	0.529301	1.61327	-0.954229	-0.363353	-0.390095	-0.586763	0.710568	0.296018	0.298993	-0.00230273	-1.62062	-1.51804	-0.0112651	-0.883432	cis assembly of pre-catalytic spliceosome [GO:0000354];mRNA splicing, via spliceosome [GO:0000398]	Cajal body [GO:0015030];cytoplasm [GO:0005737];nucleoplasm [GO:0005654];spliceosomal complex [GO:0005681];U2 snRNP [GO:0005686]	RNA binding [GO:0003723]	+	6	6	6	26.7	26.7	26.7	26.237	0	16.743	3012300000	45	90428000	155520000	131490000	136570000	225480000	204880000	243480000	210580000	131790000	145010000	156930000	132960000	54440000	70829000	74571000	70132000	121700000	71985000	113520000
-0.267472	-0.301091	-0.604657	-0.913049	0.0221521	-0.335273	0.132214	-0.640677	1.56559	1.59722	1.55175	1.61417	-0.976033	-1.11397	-0.627477	-0.70339	negative regulation of unidimensional cell growth [GO:0051511];regulation of cell wall pectin metabolic process [GO:1902066]	cell wall [GO:0005618];plant-type cell wall [GO:0009505];plasmodesma [GO:0009506]		+	10	10	10	38.4	38.4	38.4	40.37	0	37.944	3509400000	60	236920000	284810000	160740000	180410000	489600000	475840000	459760000	455090000	125120000	0	0	0	0	0	0	0	183330000	107670000	145230000
0.0937797	0.368922	0.42585	0.653174	0.228205	0.292869	-0.567082	-0.0433492	-1.17462	-2.18265	-1.44612	-0.955158	1.03722	1.08613	1.07385	1.10899	peptide catabolic process [GO:0043171];proteolysis involved in cellular protein catabolic process [GO:0051603]	cytosol [GO:0005829];mitochondrion [GO:0005739];peroxisome [GO:0005777]	metal ion binding [GO:0046872];metalloendopeptidase activity [GO:0004222]	+	57	57	57	54	54	54	110.99	0	286.2	22696000000	413	2378200000	2509300000	2108100000	1808300000	2176100000	2411500000	2419100000	2524400000	315620000	259490000	354060000	278350000	205150000	337340000	107360000	138790000	121390000	51501000	92950000
-1.64981	-0.134801	-1.00241	-1.89035	1.10043	0.652415	0.595938	0.197266	0.805014	0.460778	0.594913	0.607564	0.487594	0.397536	0.598325	-1.8204	cellular protein modification process [GO:0006464];defense response [GO:0006952];positive regulation of camalexin biosynthetic process [GO:1901183]	cytosol [GO:0005829];nucleus [GO:0005634]	protein-N-terminal asparagine amidohydrolase activity [GO:0008418];protein-N-terminal glutamine amidohydrolase activity [GO:0070773]	+	3	3	3	17.6	17.6	17.6	24.972	0	3.2061	160060000	4	0	0	0	0	0	0	0	0	0	0	0	0	17388000	17970000	10578000	13447000	16737000	15214000	12298000
0.773717	1.45449	0.785226	0.918595	-0.0163613	0.0704982	-0.384696	0.117115	-1.86012	-1.57941	-1.26743	-1.22145	0.216724	0.411118	0.528117	1.05388	regulation of programmed cell death [GO:0043067]	cytosol [GO:0005829];endoplasmic reticulum [GO:0005783];nucleus [GO:0005634];plasmodesma [GO:0009506]	mRNA binding [GO:0003729];RNA binding [GO:0003723]	+	38	38	35	59.1	59.1	56.1	61.644	0	314.62	18175000000	363	794650000	921770000	713040000	716180000	1290200000	1265200000	1042200000	1100500000	902020000	820230000	912200000	832870000	385680000	479070000	440930000	538100000	466290000	259460000	469670000
-1.5893	-1.05085	-1.50774	-1.08214	-0.446184	0.194994	-0.139963	-0.0399516	1.23114	1.36383	1.3737	1.44576	-0.170823	0.371707	-0.247142	0.292971		Golgi apparatus [GO:0005794];integral component of membrane [GO:0016021]	O-acetyltransferase activity [GO:0016413]	+	8	8	8	21.8	21.8	21.8	43.353	0	50.464	1880800000	49	54367000	60866000	25215000	55619000	63197000	52284000	46148000	68928000	11671000	22376000	13279000	25083000	32144000	40225000	54224000	66214000	210690000	165580000	245880000
0.321881	-1.6246	-1.94627	-0.930447	0.540247	-0.276936	0.0208536	0.101914	-0.0743633	1.40619	1.15486	-1.00916	1.64137	0.390188	0.175441	0.10884	defense response [GO:0006952]	anchored component of membrane [GO:0031225];anchored component of plasma membrane [GO:0046658];mitochondrion [GO:0005739];plasma membrane [GO:0005886];plasmodesma [GO:0009506]	chitin binding [GO:0008061]	+	12	12	12	30	30	30	37.739	0	67.24	10675000000	106	70063000	49995000	43880000	29712000	68278000	63346000	75286000	64624000	643760000	506680000	623740000	612480000	509770000	555240000	629450000	596830000	686800000	461350000	665260000
0.088781	0.522556	0.683462	0.4329	-1.34389	-1.00294	-0.780374	-0.740525	1.25173	1.26557	1.37743	1.48508	-0.742836	-0.680877	-0.62563	-1.19043	oxidation-reduction process [GO:0055114];potassium ion transport [GO:0006813];regulation of ion transmembrane transport [GO:0034765]	extracellular region [GO:0005576];plasma membrane [GO:0005886];plasmodesma [GO:0009506]	aldo-keto reductase (NADP) activity [GO:0004033];voltage-gated ion channel activity [GO:0005244]	+	25	25	25	62.5	62.5	62.5	36.538	0	88.432	19079000000	225	1168400000	1098200000	876810000	805090000	895200000	1019400000	777080000	858780000	733820000	759550000	938360000	872690000	483170000	548320000	508160000	554980000	947630000	603410000	926060000
-1.17266	-1.2475	-1.31339	-1.87058	0.949336	1.54952	0.354027	0.544721	1.18001	0.924139	-0.384101	0.33127	0.533206	0.0709751	0.111958	-0.560917	protein modification by small protein conjugation [GO:0032446];protein ufmylation [GO:0071569]	cytoplasm [GO:0005737];cytosol [GO:0005829]	ATP binding [GO:0005524];metal ion binding [GO:0046872];UFM1 activating enzyme activity [GO:0071566]	+	24	24	24	54.1	54.1	54.1	47.02	0	323.31	19978000000	294	943580000	1080100000	823310000	891260000	1323500000	1575700000	1237700000	1359000000	761060000	500140000	632560000	626680000	586870000	629470000	628910000	620720000	905820000	676250000	690510000
-1.04906	-1.3386	-1.55797	-1.72553	-0.528063	0.577944	-0.581592	0.610606	0.204712	0.860627	0.0438298	1.32733	1.29197	0.60542	0.578497	0.679883	hydrogen peroxide catabolic process [GO:0042744];hyperosmotic salinity response [GO:0042538];response to cold [GO:0009409];response to desiccation [GO:0009269];response to oxidative stress [GO:0006979]	endoplasmic reticulum [GO:0005783];extracellular region [GO:0005576];plant-type cell wall [GO:0009505];plasmodesma [GO:0009506]	heme binding [GO:0020037];metal ion binding [GO:0046872];peroxidase activity [GO:0004601]	+	13	12	11	53.1	50.3	45.1	34.905	0	240.17	6079000000	81	567230000	511420000	355520000	440920000	847510000	882530000	829140000	802700000	29577000	30421000	28341000	20726000	41696000	55421000	17832000	54592000	52608000	30888000	53044000
1.39738	0.805105	1.09224	1.19957	-1.31245	-0.334078	-0.0920878	0.0379053	0.714726	-0.151046	-0.337739	0.790183	-2.42122	-0.386123	-0.763132	-0.239235	embryo development ending in seed dormancy [GO:0009793];translation [GO:0006412]	chloroplast [GO:0009507];chloroplast envelope [GO:0009941];chloroplast stroma [GO:0009570];extracellular region [GO:0005576];ribosome [GO:0005840]	rRNA binding [GO:0019843];structural constituent of ribosome [GO:0003735]	+	13	13	13	38.1	38.1	38.1	24.705	0	53.646	4614400000	119	0	0	0	20962000	8527100	14276000	22290000	51266000	397650000	353670000	415990000	309070000	112900000	194250000	244560000	272040000	348130000	207480000	351680000
1.2537	1.40187	0.974738	1.22246	0.511704	-0.177596	-0.204482	-0.2886	-1.58139	-1.62268	-1.43666	-0.852189	0.428573	0.314065	0.470942	-0.414458	gibberellic acid homeostasis [GO:0010336];mitochondrial electron transport, cytochrome c to oxygen [GO:0006123];mitochondrial electron transport, ubiquinol to cytochrome c [GO:0006122]	cytosol [GO:0005829];mitochondrial intermembrane space [GO:0005758];mitochondrion [GO:0005739];nucleus [GO:0005634];respirasome [GO:0070469];vacuolar membrane [GO:0005774]	copper ion binding [GO:0005507];electron transfer activity [GO:0009055];heme binding [GO:0020037]	+	8	8	8	57.9	57.9	57.9	12.394	0	23.85	3917300000	79	93152000	73216000	109680000	62030000	137840000	63624000	132630000	142250000	259780000	242860000	276920000	269470000	184340000	194680000	191590000	189440000	122370000	55333000	95031000
-2.16113	-1.39874	-1.1409	-1.19758	0.402137	0.667074	0.956732	0.561939	1.0526	0.667779	1.0322	1.00407	-0.28951	0.0509289	-0.282597	0.0749903	regulation of proton transport [GO:0010155]	cytosol [GO:0005829];endoplasmic reticulum [GO:0005783];endoplasmic reticulum membrane [GO:0005789];integral component of membrane [GO:0016021];plasma membrane [GO:0005886];plasmodesma [GO:0009506]	mRNA binding [GO:0003729]	+	41	41	41	52.5	52.5	52.5	68.878	0	100.32	15472000000	289	964350000	948300000	634660000	570160000	848130000	1019400000	1025300000	1017800000	333590000	418590000	413360000	400740000	567020000	526580000	619310000	482410000	823760000	424390000	736380000
1.07655	1.38032	0.874973	1.33262	-0.843766	-0.74146	-1.18932	-1.73301	0.492044	0.66699	0.451832	0.848073	-1.13551	-0.355723	-0.729866	-0.394748	defense response to fungus, incompatible interaction [GO:0009817];jasmonic acid metabolic process [GO:0009694];salicylic acid metabolic process [GO:0009696];systemic acquired resistance [GO:0009627]		hydrolase activity [GO:0016787];hydrolase activity, acting on ester bonds [GO:0016788];methyl indole-3-acetate esterase activity [GO:0080030];methyl jasmonate esterase activity [GO:0080032];methyl salicylate esterase activity [GO:0080031]	+	8	7	7	42.2	38.3	38.3	28.744	0	29.432	1095300000	35	107160000	112710000	68814000	73415000	136820000	115260000	107680000	130810000	44831000	43353000	40879000	48882000	0	0	0	0	13966000	16014000	13403000
1.37475	2.18492	1.32247	0.468254	-1.16942	-0.129259	-0.62474	-0.711389	-1.17573	-0.956417	-1.02681	0.00213454	0.665161	-0.182023	0.339246	-0.381157	nitrogen compound metabolic process [GO:0006807];photorespiration [GO:0009853]	mitochondrion [GO:0005739];plasma membrane [GO:0005886]	(R)-2-hydroxyglutarate dehydrogenase activity [GO:0051990];2-hydroxyglutarate dehydrogenase activity [GO:0047545];FAD binding [GO:0071949]	+	21	21	21	40.6	40.6	40.6	61.445	0	73.937	7859500000	165	127340000	219180000	206890000	94963000	170660000	159570000	167770000	199840000	411790000	959230000	453970000	905790000	189120000	234820000	267230000	205180000	374520000	222520000	310970000
0.373303	-0.407631	0.339304	0.266858	1.20252	1.46699	1.31705	1.53687	-1.51285	-1.39438	-1.11485	-0.815652	-0.670116	-0.111193	-0.458792	-0.0174174	cellular response to tetrahydrofolate [GO:1904482];circadian rhythm [GO:0007623];folic acid metabolic process [GO:0046655];glycine biosynthetic process from serine [GO:0019264];glycine metabolic process [GO:0006544];L-serine catabolic process [GO:0006565];one-carbon metabolic process [GO:0006730];response to cadmium ion [GO:0046686];tetrahydrofolate interconversion [GO:0035999];tetrahydrofolate m…	cytosol [GO:0005829];plasma membrane [GO:0005886];plasmodesma [GO:0009506]	amino acid binding [GO:0016597];cobalt ion binding [GO:0050897];glycine hydroxymethyltransferase activity [GO:0004372];pyridoxal phosphate binding [GO:0030170];serine binding [GO:0070905];zinc ion binding [GO:0008270]	+	68	68	68	96	96	96	51.717	0	323.31	459840000000	1350	52050000000	54016000000	40505000000	42591000000	40703000000	40366000000	41068000000	41917000000	6302500000	6917300000	7230800000	6931500000	5602300000	6790700000	7144700000	7262700000	5818600000	4728800000	5973300000
-0.0221192	-0.603321	0.107089	0.00968739	0.493865	0.534496	0.344577	0.698697	-1.20078	-1.81178	-1.41118	-1.41437	1.39108	1.09505	1.02986	0.759148	DNA methylation-dependent heterochromatin assembly [GO:0006346];embryo development ending in seed dormancy [GO:0009793];one-carbon metabolic process [GO:0006730];posttranscriptional gene silencing [GO:0016441];S-adenosylmethionine cycle [GO:0033353]	cytosol [GO:0005829];plasma membrane [GO:0005886];plasmodesma [GO:0009506];vacuolar membrane [GO:0005774];vacuole [GO:0005773]	adenosylhomocysteinase activity [GO:0004013];copper ion binding [GO:0005507]	+	71	71	32	82.7	82.7	45.2	53.378	0	323.31	727950000000	2264	51742000000	56402000000	46743000000	44837000000	41506000000	40099000000	39515000000	40136000000	23453000000	20828000000	22982000000	22515000000	19671000000	21532000000	21574000000	23579000000	19055000000	14757000000	20009000000
1.1685	1.19907	1.0626	1.08536	-0.557334	-0.308763	-0.408568	-0.334261	-1.00805	-1.97781	-1.28494	-1.04166	0.659604	0.66236	0.741735	0.342158	cellular response to selenium ion [GO:0071291];response to cadmium ion [GO:0046686];response to hydrogen peroxide [GO:0042542];sulfate assimilation [GO:0000103]	cytosol [GO:0005829];plasmodesma [GO:0009506]	selenium binding [GO:0008430]	+	47	37	37	91	84.3	84.3	54.056	0	323.31	72276000000	642	3998500000	3968100000	3374300000	3375400000	4850000000	5298000000	5159000000	4738100000	3118100000	2913400000	2875200000	2865300000	1840700000	1868500000	1968800000	1995600000	1982300000	1226100000	1649300000
1.98055	1.5655	0.181865	2.21991	-0.666727	-0.671723	-0.750532	-0.659918	-0.267104	-0.222832	0.0155251	-0.212851	-0.561577	-0.690806	-0.5322	-0.727086	translation [GO:0006412]	cytosol [GO:0005829];cytosolic large ribosomal subunit [GO:0022625]	structural constituent of ribosome [GO:0003735]	+	20	20	20	78.1	78.1	78.1	12.125	0	74.046	46504000000	120	4539100000	5397200000	4430200000	4141400000	6589800000	6867100000	7018400000	7388500000	19056000	0	8021700	63573000	1221100	1394600	1272400	1488900	6230800	2452900	3514700
1.56006	0.820274	0.918062	1.71783	0.636027	0.00243174	-1.75314	-1.17466	-0.57272	0.751344	-0.214383	-0.452735	-0.886858	-0.39967	0.115253	-1.06712	fatty acid beta-oxidation [GO:0006635];fatty acid catabolic process [GO:0009062];indolebutyric acid metabolic process [GO:0080024];response to indolebutyric acid [GO:0080026];root hair elongation [GO:0048767]	peroxisome [GO:0005777]	dodecenoyl-CoA delta-isomerase activity [GO:0004165];enoyl-CoA hydratase activity [GO:0004300]	+	6	6	4	35.4	35.4	29.6	25.773	0	4.419	789150000	23	18801000	42733000	21754000	12676000	49091000	34918000	48221000	49223000	38723000	81124000	80795000	58946000	33981000	12021000	7738100	10385000	14109000	48485000	16397000
0.01383	2.63832	0.895768	-0.202568	0.631055	-0.312728	-0.372283	-0.165739	-0.810566	-1.0429	-1.07873	-0.773404	-0.646954	-0.775793	0.975889	1.0268	positive regulation of transcription, DNA-templated [GO:0045893]	cytosol [GO:0005829];nucleus [GO:0005634]	DNA-binding transcription factor activity [GO:0003700];protein heterodimerization activity [GO:0046982];sequence-specific DNA binding [GO:0043565]	+	7	7	3	28.6	28.6	11.8	17.186	0	11.64	2944300000	46	4085500	5713200	8057200	3250500	14718000	11301000	11588000	18191000	206140000	264680000	188280000	241840000	151400000	137580000	225560000	110480000	122610000	91992000	142070000
-1.86366	-1.3544	-1.26597	-1.98236	0.280451	0.392326	0.328738	0.15388	0.888194	0.521871	0.839687	0.915278	0.443442	0.60344	0.433782	0.665303	response to high light intensity [GO:0009644]	chloroplast [GO:0009507]	2 iron, 2 sulfur cluster binding [GO:0051537];electron transfer activity [GO:0009055];metal ion binding [GO:0046872]	+	4	4	4	39	39	39	16.732	0	95.109	880060000	12	0	0	0	0	0	0	0	0	0	0	0	0	43452000	42649000	42948000	42193000	127690000	69588000	104170000
-1.16025	-0.870407	-1.17388	-0.891	-0.604296	-0.208908	0.690108	-0.365084	0.0318537	-1.50393	0.595203	0.27335	1.15824	1.2183	1.0601	1.7506		intracellular membrane-bounded organelle [GO:0043231]	cinnamate beta-D-glucosyltransferase activity [GO:0050412];quercetin 3-O-glucosyltransferase activity [GO:0080043];quercetin 7-O-glucosyltransferase activity [GO:0080044];sinapate 1-glucosyltransferase activity [GO:0050284];UDP-glycosyltransferase activity [GO:0008194]	+	9	7	7	21.7	18.8	18.8	53.912	0	10.855	2141500000	60	55621000	60663000	85884000	51529000	43824000	158610000	43872000	35339000	59263000	86622000	46320000	48551000	22586000	102410000	121740000	65644000	85487000	45896000	68667000
-1.21313	-1.26602	-1.03308	-1.65578	0.0585349	0.17194	0.939104	1.00825	-0.0908343	1.66609	-1.03356	-0.202592	1.03736	0.999825	0.189453	0.424431		intracellular membrane-bounded organelle [GO:0043231]	cinnamate beta-D-glucosyltransferase activity [GO:0050412];quercetin 3-O-glucosyltransferase activity [GO:0080043];quercetin 7-O-glucosyltransferase activity [GO:0080044];sinapate 1-glucosyltransferase activity [GO:0050284];UDP-glycosyltransferase activity [GO:0008194]	+	11	11	9	22.5	22.5	19.6	53.495	0	57.879	2973000000	69	293620000	274310000	209870000	237470000	398580000	442690000	405040000	435460000	5258700	4620800	7771400	17663000	16130000	18371000	20795000	31457000	7214100	18974000	5861500
-1.32346	-1.12437	-1.15328	-1.67227	1.1166	0.827754	0.958493	0.956088	-0.283059	-0.936666	-0.391376	-0.313848	0.933241	0.921103	0.918207	0.566841	photosystem I assembly [GO:0048564]	chloroplast [GO:0009507];chloroplast stroma [GO:0009570];chloroplast thylakoid lumen [GO:0009543];chloroplast thylakoid membrane [GO:0009535];extrinsic component of membrane [GO:0019898];photosystem II oxygen evolving complex [GO:0009654];thylakoid [GO:0009579];thylakoid lumen [GO:0031977]	calcium ion binding [GO:0005509]	+	17	17	17	52.3	52.3	52.3	32.265	0	89.298	9480200000	115	2722500	5577000	3716900	0	0	9925500	0	0	54629000	72458000	71576000	82956000	876190000	727420000	1032700000	961410000	275410000	199500000	256030000
1.79153	1.62107	1.41744	1.73636	-0.894567	-0.551319	-0.81855	-0.770789	-0.25613	-0.317372	-0.387486	-0.289794	-0.423332	-0.656493	-0.460981	-0.739585	photosynthesis [GO:0015979];pyruvate metabolic process [GO:0006090]	chloroplast [GO:0009507];chloroplast stroma [GO:0009570];cytosol [GO:0005829];nucleus [GO:0005634]	ATP binding [GO:0005524];kinase activity [GO:0016301];metal ion binding [GO:0046872];pyruvate, phosphate dikinase activity [GO:0050242]	+	114	114	114	83	83	83	105.14	0	323.31	439150000000	1763	327310000	284150000	237930000	174100000	777520000	377530000	427040000	503560000	56058000000	52424000000	52112000000	54023000000	12007000000	12912000000	15411000000	16019000000	20345000000	14642000000	21802000000
-0.104475	-1.23989	-1.29867	-1.89064	1.20373	0.095328	0.250035	1.35574	-0.385544	0.26962	-0.760693	-0.648114	1.25744	0.565567	1.30787	0.0226948	maltose biosynthetic process [GO:0000024];response to cold [GO:0009409];starch catabolic process [GO:0005983]	chloroplast stroma [GO:0009570];cytosol [GO:0005829]	amylopectin maltohydrolase activity [GO:0102229];beta-amylase activity [GO:0016161]	+	51	51	51	77	77	77	61.352	0	323.31	43883000000	421	14685000	28038000	11094000	9118800	77226000	65769000	27204000	28646000	1623000000	1281200000	1773400000	1411300000	2662200000	3351800000	3189100000	3380100000	2140000000	1503900000	2128700000
-1.6758	-1.5009	-0.92499	-1.2797	0.265343	0.381843	0.116385	0.644125	0.04127	-0.647899	-0.0208742	-0.273797	0.820228	1.08709	1.33202	1.63566	diadenosine tetraphosphate biosynthetic process [GO:0015966];glycyl-tRNA aminoacylation [GO:0006426];mitochondrial glycyl-tRNA aminoacylation [GO:0070150];response to cadmium ion [GO:0046686]	chloroplast [GO:0009507];cytoplasm [GO:0005737];cytosol [GO:0005829];endosome [GO:0005768];Golgi apparatus [GO:0005794];mitochondrion [GO:0005739];nucleus [GO:0005634];trans-Golgi network [GO:0005802]	ATP binding [GO:0005524];glycine-tRNA ligase activity [GO:0004820];protein dimerization activity [GO:0046983];transferase activity [GO:0016740]	+	96	96	96	76	76	76	81.943	0	323.31	185040000000	1647	6160600000	6526100000	5244700000	4765500000	7378000000	7560100000	6849400000	7042600000	7795100000	7002200000	8001200000	7940800000	6730300000	7488200000	7851600000	8166900000	8323900000	6132100000	7968200000
-0.38586	-0.381877	-0.160276	-0.50414	-2.6422	-0.0131966	-0.429963	-1.20456	0.00791145	1.01084	1.15005	1.35329	0.0882242	0.946624	0.740203	0.424923	nucleosome assembly [GO:0006334]	chloroplast stroma [GO:0009570];chloroplast thylakoid [GO:0009534];cytosol [GO:0005829];nucleolus [GO:0005730];nucleosome [GO:0000786]	DNA binding [GO:0003677];protein heterodimerization activity [GO:0046982]	+	22	2	2	82	13.3	13.3	16.436	0	4.9846	1528200000	30	49826000	21718000	91977000	56486000	157620000	173460000	124980000	156780000	48898000	40004000	63190000	53077000	7477800	13950000	36144000	36001000	41526000	14387000	53742000
0.0837564	0.0337746	-0.1546	-0.480882	1.29282	1.71122	1.27154	1.4163	-0.777726	-1.93304	-1.13617	-0.820068	0.0529891	-0.189089	-0.411358	0.0405427	amylopectin biosynthetic process [GO:0010021];carbohydrate metabolic process [GO:0005975];cellular response to fructose stimulus [GO:0071332];cellular response to glucose stimulus [GO:0071333];cellular response to light stimulus [GO:0071482];cellular response to sucrose stimulus [GO:0071329];glycogen biosynthetic process [GO:0005978];starch biosynthetic process [GO:0019252];starch metabolic proce…	amyloplast [GO:0009501];chloroplast [GO:0009507];chloroplast stroma [GO:0009570];cytoplasm [GO:0005737]	1,4-alpha-glucan branching enzyme activity (using a glucosylated glycogenin as primer for glycogen synthesis) [GO:0102752];1,4-alpha-glucan branching enzyme activity [GO:0003844];cation binding [GO:0043169];hydrolase activity, hydrolyzing O-glycosyl compounds [GO:0004553]	+	28	28	23	36.6	36.6	30.2	97.659	0	127.52	8381400000	219	187200000	252510000	162990000	183530000	342820000	403070000	258220000	293870000	347810000	340130000	347070000	274840000	427240000	533470000	557610000	604600000	272000000	165270000	297140000
-1.81704	-2.59519	-1.29576	0.700936	0.464136	0.199466	0.357059	0.265896	0.75917	0.672309	0.727771	0.773629	0.120899	0.279227	0.105759	0.281737	homoserine biosynthetic process [GO:0009090];lysine biosynthetic process via diaminopimelate [GO:0009089];threonine biosynthetic process [GO:0009088]	chloroplast stroma [GO:0009570];cytoplasm [GO:0005737]	aspartate kinase activity [GO:0004072];ATP binding [GO:0005524]	+	14	12	9	25.9	24.8	18.8	59.604	0	35.4	2620600000	66	106480000	110560000	104260000	97507000	154620000	214670000	197940000	225410000	0	0	4835700	95364000	73249000	60875000	44918000	79141000	196020000	151120000	221020000
0.69993	0.503555	0.752549	0.715334	-0.376489	-0.550809	-0.362324	-0.25099	0.857852	1.09803	1.02635	1.36894	-1.60059	-1.09307	-1.50856	-1.27971	ATP metabolic process [GO:0046034];Golgi organization [GO:0007030];pollen development [GO:0009555]	cell wall [GO:0005618];chloroplast [GO:0009507];chloroplast envelope [GO:0009941];cytosol [GO:0005829];Golgi apparatus [GO:0005794];mitochondrion [GO:0005739];plant-type vacuole [GO:0000325];plasma membrane [GO:0005886];plasmodesma [GO:0009506];proton-transporting V-type ATPase, V1 domain [GO:0033180];vacuolar membrane [GO:0005774];vacuole [GO:0005773]	ATP binding [GO:0005524];protease binding [GO:0002020];proton-transporting ATPase activity, rotational mechanism [GO:0046961]	+	82	82	81	86	86	86	68.812	0	323.31	347340000000	1582	29987000000	28725000000	23683000000	25136000000	34163000000	34628000000	33360000000	33914000000	7528800000	7179500000	8578300000	7650000000	5468800000	4772500000	5837800000	5428500000	7898700000	5496700000	8331100000
0.106765	0.0355875	0.37931	1.30698	-0.832833	-0.93079	-0.966454	-0.453729	-0.927845	0.747677	-1.50524	-0.693595	-0.253657	1.70278	0.553403	1.73164	embryo development ending in seed dormancy [GO:0009793];mRNA processing [GO:0006397];mRNA transport [GO:0051028];nuclear-transcribed mRNA catabolic process, nonsense-mediated decay [GO:0000184];pollen tube guidance [GO:0010183];positive regulation of gene expression [GO:0010628];regulation of translation [GO:0006417];RNA splicing [GO:0008380]	exon-exon junction complex [GO:0035145];nuclear speck [GO:0016607];nucleolus [GO:0005730];nucleoplasm [GO:0005654];P-body [GO:0000932]	RNA binding [GO:0003723]	+	15	15	15	82.7	82.7	82.7	17.458	0	120.52	11732000000	150	866650000	1050900000	650650000	814320000	970470000	1019600000	1028600000	942400000	316910000	313910000	301630000	360700000	171470000	233370000	187740000	208200000	313590000	241570000	230790000
0.686191	0.888092	0.430182	0.476623	-2.00221	-0.728208	-1.86547	-1.31156	1.2096	0.064615	0.740771	1.1949	0.364718	-0.103225	-0.00893191	-0.0360849	proteasomal protein catabolic process [GO:0010498];proteasomal ubiquitin-independent protein catabolic process [GO:0010499];proteasome-mediated ubiquitin-dependent protein catabolic process [GO:0043161];response to zinc ion [GO:0010043]	cytoplasm [GO:0005737];cytosol [GO:0005829];cytosolic ribosome [GO:0022626];nucleus [GO:0005634];proteasome complex [GO:0000502];proteasome core complex [GO:0005839];proteasome core complex, alpha-subunit complex [GO:0019773]	endopeptidase activity [GO:0004175];threonine-type endopeptidase activity [GO:0004298]	+	28	28	5	96.6	96.6	20.4	25.701	0	323.31	63352000000	485	4762800000	4883600000	4118800000	3446700000	6147200000	5858200000	5280500000	4938200000	1636900000	1685600000	1734400000	1587700000	830110000	1122500000	1090300000	934610000	2025400000	1094900000	1866800000
0.471959	-0.772354	0.0365741	-0.690494	-1.31184	-0.578799	-1.66462	-0.813355	1.3568	2.10576	1.23671	0.509848	0.0849251	-0.0919338	0.312123	-0.191295	proteasomal protein catabolic process [GO:0010498];proteasomal ubiquitin-independent protein catabolic process [GO:0010499];proteasome-mediated ubiquitin-dependent protein catabolic process [GO:0043161]	cytoplasm [GO:0005737];cytosol [GO:0005829];nucleus [GO:0005634];proteasome complex [GO:0000502];proteasome core complex [GO:0005839];proteasome core complex, beta-subunit complex [GO:0019774]	endopeptidase activity [GO:0004175];threonine-type endopeptidase activity [GO:0004298]	+	24	24	6	60.4	60.4	21.6	29.555	0	180.41	25112000000	233	2286300000	2559600000	1573000000	1847100000	2283200000	2365600000	2286800000	2340300000	491220000	420570000	474540000	516920000	299300000	371610000	310680000	375640000	487040000	593740000	580280000
0.302054	0.203862	0.29329	0.558417	-0.205326	-2.56355	-2.3779	0.0294249	0.511975	0.457005	0.279096	0.351712	0.98094	0.218255	0.312718	0.64802	proteasomal protein catabolic process [GO:0010498];proteasomal ubiquitin-independent protein catabolic process [GO:0010499];proteasome-mediated ubiquitin-dependent protein catabolic process [GO:0043161]	apoplast [GO:0048046];cytoplasm [GO:0005737];cytosol [GO:0005829];nucleus [GO:0005634];plasma membrane [GO:0005886];proteasome complex [GO:0000502];proteasome core complex [GO:0005839];proteasome core complex, beta-subunit complex [GO:0019774];secretory vesicle [GO:0099503];vacuolar membrane [GO:0005774];vacuole [GO:0005773]	endopeptidase activity [GO:0004175];threonine-type endopeptidase activity [GO:0004298]	+	13	4	4	63.7	17.6	17.6	22.54	0	6.4133	2203300000	21	301080000	249700000	136720000	205530000	184970000	199550000	217010000	177760000	15200000	12607000	16517000	10636000	1989400	0	0	8836000	13546000	52471000	6687800
-0.714125	-0.355243	-0.33419	0.423979	-0.683707	-0.867333	-1.8345	-1.15814	1.56279	1.32817	1.4156	1.23571	0.0944262	0.0674224	0.344848	-0.5257	proteasomal protein catabolic process [GO:0010498];proteasomal ubiquitin-independent protein catabolic process [GO:0010499];proteasome-mediated ubiquitin-dependent protein catabolic process [GO:0043161];response to cadmium ion [GO:0046686];response to cold [GO:0009409]	apoplast [GO:0048046];cytoplasm [GO:0005737];cytosol [GO:0005829];nucleus [GO:0005634];peroxisome [GO:0005777];proteasome complex [GO:0000502];proteasome core complex [GO:0005839];proteasome core complex, alpha-subunit complex [GO:0019773];vacuolar membrane [GO:0005774];vacuole [GO:0005773]	endopeptidase activity [GO:0004175];threonine-type endopeptidase activity [GO:0004298]	+	32	32	32	81.5	81.5	81.5	27.377	0	310.18	43511000000	393	3851200000	3916600000	3197300000	2766900000	3681200000	4312100000	3803900000	3767000000	891070000	781070000	871770000	696400000	469440000	636340000	516660000	728970000	1207600000	614530000	1292000000
0.0444336	-0.819511	0.568104	0.865372	-0.208258	-1.70814	-1.7525	-1.8885	0.873726	0.757249	0.822739	0.597626	0.315189	0.860494	0.667331	0.00464217	proteasomal protein catabolic process [GO:0010498];proteasomal ubiquitin-independent protein catabolic process [GO:0010499];proteasome-mediated ubiquitin-dependent protein catabolic process [GO:0043161]	cytoplasm [GO:0005737];nucleus [GO:0005634];proteasome core complex [GO:0005839];proteasome core complex, beta-subunit complex [GO:0019774]	endopeptidase activity [GO:0004175];threonine-type endopeptidase activity [GO:0004298]	+	21	21	7	72.6	72.6	35.4	29.667	0	323.31	30430000000	258	2674300000	2741900000	2203000000	1725600000	2826000000	2627600000	2804700000	2714800000	605200000	630200000	674550000	498970000	410200000	449570000	476690000	524500000	778880000	535100000	764870000
0.227905	0.0277424	0.457436	0.0887723	1.56156	1.15106	0.629533	1.00097	-1.60942	-1.13004	-1.23464	-1.92751	0.0725533	-0.106987	0.652476	0.13858	isopentenyl diphosphate biosynthetic process, mevalonate pathway [GO:0019287];sterol biosynthetic process [GO:0016126]	cytosol [GO:0005829];peroxisome [GO:0005777]	ATP binding [GO:0005524];diphosphomevalonate decarboxylase activity [GO:0004163];identical protein binding [GO:0042802]	+	37	37	25	79.4	79.4	62.1	45.585	0	323.31	92531000000	489	9512500000	9632400000	7699900000	7695100000	10426000000	10508000000	9602600000	10314000000	1319400000	1022300000	1241000000	1152500000	960050000	1167800000	1018500000	1152400000	837730000	674220000	1026700000
-0.377409	0.335274	-0.215618	-0.204146	-0.948858	-0.917104	-1.16183	0.677869	0.722331	1.3324	1.11576	1.70879	-0.493314	-2.06579	0.325108	0.166527	cellular response to abscisic acid stimulus [GO:0071215];gibberellin mediated signaling pathway [GO:0010476];positive regulation of protein phosphorylation [GO:0001934];positive regulation of signal transduction [GO:0009967];regulation of translation [GO:0006417];rescue of stalled ribosome [GO:0072344];response to cadmium ion [GO:0046686];response to gibberellin [GO:0009739];response to glucose […	chloroplast [GO:0009507];cytoplasm [GO:0005737];cytosol [GO:0005829];cytosolic ribosome [GO:0022626];cytosolic small ribosomal subunit [GO:0022627];nucleus [GO:0005634];polysomal ribosome [GO:0042788]	enzyme binding [GO:0019899];MAP-kinase scaffold activity [GO:0005078];protein kinase C binding [GO:0005080];ribosome binding [GO:0043022];structural constituent of ribosome [GO:0003735]	+	48	48	35	89.3	89.3	77.4	35.747	0	323.31	142560000000	648	15896000000	14392000000	11437000000	11653000000	20644000000	19890000000	17071000000	18535000000	789020000	800180000	951900000	965270000	432680000	617030000	625130000	859270000	799680000	712330000	881290000
-1.18856	-1.03404	-0.989706	-1.22994	-0.20268	0.131532	0.0384572	0.178082	1.64356	1.25449	1.48387	1.64011	-0.451179	-0.455837	-0.512309	-0.305862	acetyl-CoA biosynthetic process from pyruvate [GO:0006086];glycolytic process [GO:0006096]	chloroplast [GO:0009507];chloroplast envelope [GO:0009941];chloroplast stroma [GO:0009570];plastid [GO:0009536]	pyruvate dehydrogenase (acetyl-transferring) activity [GO:0004739]	+	55	55	55	73.4	73.4	73.4	47.173	0	323.31	58769000000	704	3750700000	4019100000	3048600000	2963100000	5366700000	4707500000	4843900000	4855000000	977640000	918350000	1207600000	923960000	974780000	1287700000	1257100000	1571700000	2777900000	1756400000	3014800000
1.54688	0.927359	1.32747	0.749095	-0.997638	-0.653119	-0.713577	-1.94439	0.0810247	-0.914694	-0.613373	-0.988015	0.911765	0.127342	0.617537	0.536324	methylglyoxal catabolic process to D-lactate via S-lactoyl-glutathione [GO:0019243]	cytosol [GO:0005829];secretory vesicle [GO:0099503]	hydroxyacylglutathione hydrolase activity [GO:0004416];metal ion binding [GO:0046872]	+	27	27	27	85.3	85.3	85.3	28.791	0	323.31	46920000000	440	1166900000	1412400000	946000000	808570000	1419300000	1276300000	1284300000	1243800000	3006600000	2786600000	3096900000	2853100000	1317100000	1665700000	1919000000	1604700000	2276400000	1375000000	2313300000
-0.946563	-1.29867	-1.68975	-1.85446	0.266341	-0.716686	0.568864	0.199834	0.663556	0.418178	-0.110883	0.552601	0.744644	0.649094	1.32793	1.22598	fatty acid metabolic process [GO:0006631];triglyceride biosynthetic process [GO:0019432]	cytosol [GO:0005829]	heme binding [GO:0020037];metal ion binding [GO:0046872];oxygen binding [GO:0019825];oxygen carrier activity [GO:0005344]	+	16	16	16	89.2	89.2	89.2	17.871	0	54.252	9646400000	149	244240000	70963000	71802000	93843000	44746000	63403000	39381000	60826000	476090000	375510000	329840000	397390000	501240000	468310000	526510000	563770000	747050000	568230000	377790000
-2.26065	-1.26467	-0.71073	-1.91097	0.479804	0.432621	0.910099	0.178805	0.157104	0.426439	0.423596	0.030011	0.662206	0.896222	0.887908	0.662206	cell wall macromolecule catabolic process [GO:0016998];chitin catabolic process [GO:0006032];defense response [GO:0006952];polysaccharide catabolic process [GO:0000272];response to fungus [GO:0009620]		chitin binding [GO:0008061];chitinase activity [GO:0004568]	+	3	3	3	12.5	12.5	12.5	28.78	0	3.0266	323850000	6	0	0	0	0	0	0	0	0	0	0	0	0	12269000	28063000	44296000	3568900	33195000	25651000	31064000
0.144932	0.024496	0.329312	0.0784081	-0.1728	-0.00612446	-2.16321	0.103798	1.12263	1.24029	1.06814	1.08047	-2.21302	-0.24086	-0.16162	-0.234848	cell wall macromolecule catabolic process [GO:0016998];chitin catabolic process [GO:0006032];leaf senescence [GO:0010150];polysaccharide catabolic process [GO:0000272];response to amitrole [GO:0072722];response to silver ion [GO:0010272];response to virus [GO:0009615];systemic acquired resistance [GO:0009627]	apoplast [GO:0048046];secretory vesicle [GO:0099503]	chitin binding [GO:0008061];chitinase activity [GO:0004568]	+	16	16	16	67.5	67.5	67.5	29.775	0	272.73	12804000000	168	19287000	21265000	20020000	5850600	22787000	7018300	24733000	25789000	812090000	694890000	879060000	666620000	468800000	599190000	405050000	621270000	1349800000	1156700000	1246200000
0.447776	0.898035	0.544151	0.337102	0.412979	-1.96618	-2.6626	-0.951484	0.341248	0.642324	0.721406	0.58487	0.0362282	0.110293	0.151528	0.352327	proteasomal protein catabolic process [GO:0010498];proteasomal ubiquitin-independent protein catabolic process [GO:0010499];proteasome-mediated ubiquitin-dependent protein catabolic process [GO:0043161];ubiquitin-dependent protein catabolic process [GO:0006511]	cytoplasm [GO:0005737];nucleus [GO:0005634];plastid [GO:0009536];proteasome complex [GO:0000502];proteasome core complex [GO:0005839];proteasome core complex, alpha-subunit complex [GO:0019773];vacuole [GO:0005773]	endopeptidase activity [GO:0004175];threonine-type endopeptidase activity [GO:0004298]	+	19	3	3	60.8	12	12	27.324	0	12.977	456260000	15	52376000	77793000	27781000	23877000	22877000	30993000	54658000	84355000	2099800	4113800	2632300	11030000	1397500	0	0	0	11821000	2029300	3275000
0.376163	0.321332	0.0863213	0.661784	-0.688109	-1.53939	-1.63437	-1.82984	0.69174	1.16822	0.703109	0.993612	0.888355	0.206306	0.574692	-0.979919	proteasomal protein catabolic process [GO:0010498];proteasomal ubiquitin-independent protein catabolic process [GO:0010499];proteasome-mediated ubiquitin-dependent protein catabolic process [GO:0043161]	cytoplasm [GO:0005737];nucleus [GO:0005634];proteasome core complex [GO:0005839];proteasome core complex, beta-subunit complex [GO:0019774]	endopeptidase activity [GO:0004175];threonine-type endopeptidase activity [GO:0004298]	+	20	20	11	87.4	87.4	54.8	21.984	0	104.82	12428000000	142	1360000000	1376300000	903000000	761800000	1243000000	1430400000	1012800000	1128600000	293800000	278130000	324630000	267740000	111830000	120220000	109920000	136130000	173960000	207660000	173150000
-0.342951	-0.693662	-0.624068	-0.897763	1.05358	1.29935	0.388181	0.820695	-1.06564	-1.16892	-1.25101	-1.27774	0.54153	0.855215	0.99912	1.36409	protein transport [GO:0015031];small GTPase mediated signal transduction [GO:0007264];vesicle-mediated transport [GO:0016192]	apoplast [GO:0048046];cytoplasm [GO:0005737];cytosol [GO:0005829];plasmodesma [GO:0009506]	GTPase activator activity [GO:0005096];Rab GDP-dissociation inhibitor activity [GO:0005093];Rab GTPase binding [GO:0017137]	+	56	56	44	81.3	81.3	62.2	49.538	0	323.31	133560000000	868	11132000000	11725000000	9263900000	8874300000	12937000000	11834000000	10814000000	12210000000	2473100000	2136100000	2922100000	3146700000	2349200000	2579000000	2708200000	2537500000	2421700000	1946700000	2265000000
-1.62297	-1.06671	-0.99184	-0.382682	-0.0609649	-0.57355	-0.41644	0.0721994	0.672519	1.72451	1.02554	1.85146	-1.02572	0.283331	-0.2013	0.712609	cell wall macromolecule catabolic process [GO:0016998];chitin catabolic process [GO:0006032];defense response [GO:0006952];polysaccharide catabolic process [GO:0000272]	secretory vesicle [GO:0099503]	chitin binding [GO:0008061];chitinase activity [GO:0004568]	+	8	8	8	43.9	43.9	43.9	28.353	0	323.31	13659000000	204	41466000	62871000	6702900	23337000	1059200000	867500000	1122300000	1073900000	435490000	342160000	580180000	555780000	466450000	499010000	430540000	551790000	677710000	477800000	886930000
-1.53594	-1.16685	0.013394	-0.90812	0.794868	0.867387	0.946703	1.05232	-0.652827	-0.74112	-1.31008	-0.862665	0.520803	1.50391	0.68805	0.790155	cellular response to hypoxia [GO:0071456]		hydrolase activity [GO:0016787]	+	14	14	14	54.9	54.9	54.9	28.809	0	31.931	3790500000	91	11198000	31827000	11020000	7326200	30309000	25379000	48223000	4082200	201550000	161540000	208230000	227890000	185990000	187260000	224470000	216410000	294610000	182470000	148520000
-1.42548	-1.07225	-1.05238	-0.823846	1.43121	0.787684	0.310304	0.806937	-0.952373	-0.651929	-0.988852	-0.263603	1.06356	1.03967	0.437461	1.35389		cytosol [GO:0005829]	catalytic activity [GO:0003824];molybdenum ion binding [GO:0030151];pyridoxal phosphate binding [GO:0030170]	+	31	31	31	80.5	80.5	80.5	34.798	0	322.4	42305000000	378	1585000000	1643600000	1290500000	1282100000	2172200000	2364200000	2207900000	2475700000	1623500000	1548400000	1319200000	1427700000	1645700000	1699600000	1643700000	1808600000	1405100000	927330000	1611400000
-0.0953796	0.796568	1.2048	0.614129	-0.325405	1.25453	0.911887	0.348044	0.142755	-0.781733	0.912805	-0.261141	-0.313623	-0.963305	-0.885116	-2.55981	asparaginyl-tRNA aminoacylation [GO:0006421];plant ovule development [GO:0048481]	chloroplast [GO:0009507];chloroplast stroma [GO:0009570];mitochondrion [GO:0005739]	asparagine-tRNA ligase activity [GO:0004816];ATP binding [GO:0005524];DNA binding [GO:0003677]	+	37	36	36	43.6	43.6	43.6	63.698	0	323.31	79795000000	487	201900000	385420000	308910000	225580000	305330000	362430000	271360000	307230000	5606800000	4996100000	5507800000	5103500000	3389200000	4673300000	4826400000	4851600000	4822300000	3271100000	5380100000
-1.62677	-1.27362	-1.35778	-1.98486	0.664227	0.571615	-0.0612279	0.0324114	0.407091	0.462045	0.106192	0.267795	1.11099	1.08127	0.680201	0.920429	response to cadmium ion [GO:0046686];response to oxidative stress [GO:0006979]	chloroplast [GO:0009507];cytosol [GO:0005829];mitochondrion [GO:0005739];plasma membrane [GO:0005886]	glutathione peroxidase activity [GO:0004602];peroxidase activity [GO:0004601];phospholipid-hydroperoxide glutathione peroxidase activity [GO:0047066]	+	31	31	31	69.4	69.4	69.4	25.584	0	257.24	67014000000	404	6396700000	5924500000	4621900000	4494500000	7350000000	7391600000	7526300000	7640000000	576680000	558450000	561060000	551140000	561890000	727200000	935550000	735380000	894100000	913890000	1049100000
-0.160712	0.528807	-1.91574	-1.9025	0.674602	-0.0319837	-1.03669	0.239108	-0.607385	1.06487	-0.650351	0.0346376	0.851862	0.76555	1.44422	0.701705	polyamine biosynthetic process [GO:0006596];spermidine biosynthetic process [GO:0008295]	cytosol [GO:0005829];mitochondrion [GO:0005739];plasma membrane [GO:0005886]	spermidine synthase activity [GO:0004766]	+	23	18	17	70.9	49.4	49.4	37.14	0	323.31	42442000000	347	2583700000	2895400000	2201800000	2531300000	2815300000	2743100000	2778200000	3056400000	1414500000	1362400000	1216400000	1117400000	1156800000	1249800000	1158600000	1357200000	1242600000	991780000	1324700000
-0.617597	-0.158666	-1.65266	-1.68095	0.857592	1.44316	0.49873	1.65516	0.752845	-0.183119	-0.473907	-1.10385	0.289452	-0.562419	0.0507742	0.885451	defense response by callose deposition in cell wall [GO:0052544];defense response to bacterium [GO:0042742];glucosinolate biosynthetic process [GO:0019761]	cytosol [GO:0005829];intracellular membrane-bounded organelle [GO:0043231];nucleus [GO:0005634]	quercetin 3-O-glucosyltransferase activity [GO:0080043];quercetin 7-O-glucosyltransferase activity [GO:0080044];thiohydroximate beta-D-glucosyltransferase activity [GO:0047251];UDP-glucose: 4-methylthiobutylhydroximate S-glucosyltransferase activity [GO:0102659];UDP-glucose: 6-methylthiohexylhydroximate S-glucosyltransferase activity [GO:0103100];UDP-glucose: 9-methylthiononylhydroximate S-glucos…	+	35	35	35	52.8	52.8	52.8	51.002	0	295.8	38003000000	483	1705100000	1723900000	1180800000	1358300000	2285500000	2665700000	2239800000	2447700000	1468800000	1197400000	1327200000	1308300000	1037100000	1530000000	1406100000	1506800000	1406600000	1049000000	1505400000
-2.35976	-0.938626	-1.41074	-0.634284	0.664932	-0.479394	-0.283227	0.205012	0.325352	1.1711	0.86206	1.27304	0.0583209	0.157229	0.179753	1.20924	cell wall modification [GO:0042545];pectin catabolic process [GO:0045490];response to bacterium [GO:0009617]	cell wall [GO:0005618];extracellular region [GO:0005576]	aspartyl esterase activity [GO:0045330];pectinesterase activity [GO:0030599];pectinesterase inhibitor activity [GO:0046910]	+	5	5	5	11.2	11.2	11.2	60.416	0	10.406	872980000	27	0	0	0	3931300	0	0	0	0	5352800	10795000	9676400	13638000	62014000	46873000	39324000	64949000	67291000	61809000	87047000
0.815794	1.24639	1.20334	2.0902	-0.691765	0.166538	-0.082852	0.266123	-0.580654	-1.80679	-0.258717	-1.26768	-0.629727	-0.398109	-0.558931	0.486838	chloroplast accumulation movement [GO:0009904];chloroplast avoidance movement [GO:0009903]	cytosol [GO:0005829];peroxisome [GO:0005777];plasma membrane [GO:0005886]		+	25	25	25	29.6	29.6	29.6	89.293	0	62.364	11335000000	151	828770000	1000000000	830840000	962080000	735770000	877150000	790230000	1080500000	406630000	497330000	374520000	390330000	202110000	157800000	210780000	217350000	220590000	113400000	222140000
0.938285	1.49522	0.666754	0.298742	0.966823	0.647443	-0.170367	0.472833	-0.671704	0.526204	0.785673	-0.41904	-1.02096	-1.28095	-2.00926	-1.22569	ubiquitin-dependent protein catabolic process [GO:0006511]	cytoplasm [GO:0005737];nucleus [GO:0005634];proteasome regulatory particle, lid subcomplex [GO:0008541]	endopeptidase activator activity [GO:0061133];proteasome binding [GO:0070628];ubiquitin binding [GO:0043130]	+	8	8	8	35	35	35	33.297	0	25.24	1117600000	33	99441000	70221000	49696000	44776000	96331000	149370000	153070000	133870000	35066000	37904000	26825000	12333000	21325000	14529000	11337000	25959000	19784000	16584000	28495000
1.76756	0.460964	1.29421	1.14151	-0.136132	0.295841	-1.85153	-0.630263	0.388785	0.504933	-0.16524	-0.295388	-0.257528	-2.00791	-0.204467	-0.305348	cell redox homeostasis [GO:0045454];glycerol ether metabolic process [GO:0006662];negative regulation of catalytic activity [GO:0043086];positive regulation of catalytic activity [GO:0043085];regulation of carbohydrate metabolic process [GO:0006109];response to cold [GO:0009409]	apoplast [GO:0048046];chloroplast [GO:0009507];chloroplast envelope [GO:0009941];chloroplast stroma [GO:0009570];cytoplasm [GO:0005737];extracellular region [GO:0005576];stromule [GO:0010319];thylakoid [GO:0009579]	enzyme activator activity [GO:0008047];enzyme inhibitor activity [GO:0004857];oxidoreductase activity, acting on a sulfur group of donors, disulfide as acceptor [GO:0016671];protein disulfide oxidoreductase activity [GO:0015035];protein-disulfide reductase activity [GO:0047134]	+	13	13	13	39.7	39.7	39.7	19.664	0	228.03	12460000000	144	0	0	0	0	0	0	5474600	0	1157500000	1114600000	1055600000	894470000	503100000	697320000	461200000	504790000	856220000	562490000	762530000
1.26953	1.28172	1.38536	1.09639	-0.435691	-0.467175	-0.47251	-1.97172	0.610936	0.0681515	0.638059	0.493217	-0.871347	-0.988473	-0.84663	-0.789809	chlorophyll biosynthetic process [GO:0015995];photosynthesis [GO:0015979]	chloroplast [GO:0009507];chloroplast envelope [GO:0009941];chloroplast membrane [GO:0031969];chloroplast thylakoid [GO:0009534];chloroplast thylakoid membrane [GO:0009535];extracellular region [GO:0005576]	NADPH dehydrogenase activity [GO:0003959];protochlorophyllide reductase activity [GO:0016630]	+	43	37	37	75.8	68.8	68.8	43.882	0	323.31	55395000000	515	0	0	0	0	0	0	19652000	19968000	6154200000	5250900000	6351200000	4987300000	2040200000	2271900000	2437100000	2211600000	4524900000	2382000000	4522500000
-1.39407	-1.14241	-1.48819	-2.03226	0.163774	0.607969	0.700681	0.571526	1.159	0.050453	0.944343	1.35312	0.164988	0.129611	0.275593	-0.0641342	cell redox homeostasis [GO:0045454];response to endoplasmic reticulum stress [GO:0034976]	endoplasmic reticulum [GO:0005783];endoplasmic reticulum lumen [GO:0005788];Golgi apparatus [GO:0005794];plasma membrane [GO:0005886];vacuole [GO:0005773]	protein disulfide isomerase activity [GO:0003756]	+	26	26	23	44.3	44.3	43	47.754	0	193.07	19444000000	359	535270000	494420000	483980000	462010000	1269700000	1359800000	1237100000	1271800000	634820000	562140000	537870000	541550000	571200000	794640000	606490000	838000000	988860000	522120000	1092100000
-1.44019	-0.826514	-0.128358	-0.72406	0.0879693	0.608453	1.12811	0.747134	-0.807154	-0.571202	-1.50057	-0.723118	1.45914	0.170761	1.71165	0.807959	carbohydrate metabolic process [GO:0005975]		beta-glucosidase activity [GO:0008422];scopolin beta-glucosidase activity [GO:0102483]	+	6	6	5	9.3	9.3	8.1	70.189	0	11.725	498830000	31	0	0	0	0	0	0	0	0	7649000	8816200	40379000	9772100	42598000	38117000	43360000	20610000	14047000	29490000	9493700
1.64935	1.83806	1.29396	1.58632	-0.0693561	-1.10027	-0.568349	-0.540038	-0.199166	-0.242185	-0.170885	-0.372089	-0.983101	-0.406594	-0.931547	-0.78411	carotenoid biosynthetic process [GO:0016117];cellular response to UV-C [GO:0071494];chloroplast-nucleus signaling pathway [GO:0010019];flavonoid biosynthetic process [GO:0009813];heme oxidation [GO:0006788];photosynthesis [GO:0015979];phytochromobilin biosynthetic process [GO:0010024];regulation of meristem growth [GO:0010075];regulation of stomatal movement [GO:0010119]	chloroplast [GO:0009507]	heme binding [GO:0020037];heme oxygenase (decyclizing) activity [GO:0004392];metal ion binding [GO:0046872]	+	17	17	17	55.3	55.3	55.3	32.691	0	30.639	4565300000	94	75827000	89065000	64367000	44135000	68428000	87027000	73177000	102940000	442350000	317830000	547210000	413980000	194950000	156640000	172560000	123710000	226700000	140790000	193380000
-0.576411	0.0672836	0.082059	-0.510271	0.739828	0.761846	1.89663	0.443174	-1.49808	-1.77804	-1.14664	-0.544929	1.28192	-0.0782763	0.898027	-0.0381203		integral component of membrane [GO:0016021];peroxisome [GO:0005777];plasma membrane [GO:0005886]	ATP binding [GO:0005524];protein kinase activity [GO:0004672]	+	15	15	15	26.1	26.1	26.1	71.751	0	107.66	5095200000	85	114860000	73136000	260310000	31438000	95517000	40109000	25024000	277100000	216150000	278880000	310630000	349610000	218640000	261790000	285690000	290810000	163240000	231530000	177720000
-1.22099	-1.33161	-1.33092	-1.29031	0.0320293	-0.20785	0.0697003	0.120418	1.44933	0.729836	1.6659	1.62823	-0.161435	-0.307656	0.225654	-0.0703318		cytosol [GO:0005829];nucleus [GO:0005634]		+	48	48	48	65.2	65.2	65.2	82.707	0	323.31	32204000000	479	1151700000	1205700000	836450000	807520000	1219300000	1247900000	1388200000	1185800000	1089600000	951630000	1038400000	1062500000	870210000	1186800000	1406300000	1421100000	2277400000	1212100000	2361800000
0.628848	0.767264	0.735729	1.06104	1.1505	0.850286	-0.259816	-0.459747	-0.117596	1.72711	-1.08074	-0.383539	-0.808637	-1.08604	-1.65053	-1.07413	plant-type cell wall organization [GO:0009664];syncytium formation [GO:0006949]	cytosol [GO:0005829];extracellular region [GO:0005576];membrane [GO:0016020];plant-type cell wall [GO:0009505];plasmodesma [GO:0009506]		+	2	2	2	8.2	8.2	8.2	27.847	0.0014848	2.2519	457370000	5	9676600	12880000	12299000	17501000	44500000	72632000	23580000	39338000	22188000	26405000	28995000	49461000	21601000	27585000	0	0	0	48730000	0
-1.05504	-0.83417	-1.27959	-1.41865	0.65435	0.792879	0.422954	1.02396	-0.668811	-0.621216	-0.877664	-0.686397	1.05007	1.19076	1.18111	1.12546	circadian rhythm [GO:0007623];response to abscisic acid [GO:0009737];response to cold [GO:0009409];response to high light intensity [GO:0009644];response to salt stress [GO:0009651];response to water deprivation [GO:0009414]	chloroplast [GO:0009507];plasma membrane [GO:0005886]		+	43	43	43	79.6	79.6	79.6	49	0	323.31	70586000000	672	2225200000	2665400000	2326600000	2159300000	2023800000	2131900000	1939800000	2172300000	2733500000	2453900000	2837600000	2433200000	2569100000	3472100000	3247000000	3598100000	2439800000	1754800000	2461100000
1.23534	0.969662	1.53878	1.20735	-0.446178	-2.35194	-0.326448	-0.131084	0.554455	-0.0440522	-0.425617	0.658774	-1.06468	-0.125697	-0.611884	-0.636778	proteasome-mediated ubiquitin-dependent protein catabolic process [GO:0043161];regulation of protein catabolic process [GO:0042176]	cytosol [GO:0005829];endoplasmic reticulum [GO:0005783];nucleus [GO:0005634];proteasome complex [GO:0000502];proteasome regulatory particle, base subcomplex [GO:0008540];proteasome storage granule [GO:0034515]	enzyme regulator activity [GO:0030234]	+	61	61	33	60.6	60.6	34.8	108.98	0	323.31	42735000000	411	4818900000	5066200000	4497500000	4039400000	5479200000	6323800000	5078900000	5176000000	246040000	286820000	346060000	259130000	64481000	50401000	73342000	62637000	140810000	93897000	111830000
-1.77358	-1.60303	-0.709717	-1.48034	-0.244227	-0.164032	0.41154	-0.266534	1.19308	1.07277	1.11574	1.35019	-0.0470873	0.361771	0.0913439	0.692107	cellular response to phosphate starvation [GO:0016036];glycolipid biosynthetic process [GO:0009247];sulfolipid biosynthetic process [GO:0046506]	chloroplast [GO:0009507];plasma membrane [GO:0005886]	sulfotransferase activity [GO:0008146];UDPsulfoquinovose synthase activity [GO:0046507];zinc ion binding [GO:0008270]	+	31	31	31	62.3	62.3	62.3	53.113	0	323.31	36821000000	439	140110000	145240000	86160000	82121000	156370000	154740000	166420000	191660000	1447800000	1393900000	1815000000	1387400000	1366700000	1902200000	2038600000	1985500000	3057300000	2046900000	3220500000
1.76708	0.962949	0.613456	1.70212	0.739726	0.107009	0.344126	0.229376	-1.43584	-0.889303	-1.41404	-1.10576	-0.386363	-0.685243	-0.0482287	-0.501067	chloroplast accumulation movement [GO:0009904];chloroplast avoidance movement [GO:0009903];circadian rhythm [GO:0007623];negative regulation of anion channel activity by blue light [GO:0010362];phototropism [GO:0009638];protein autophosphorylation [GO:0046777];protein phosphorylation [GO:0006468];protein-chromophore linkage [GO:0018298];regulation of proton transport [GO:0010155];regulation of st…	cell surface [GO:0009986];cytoplasm [GO:0005737];cytoplasmic side of plasma membrane [GO:0009898];nucleus [GO:0005634];plasma membrane [GO:0005886];vacuole [GO:0005773]	ATP binding [GO:0005524];blue light photoreceptor activity [GO:0009882];FMN binding [GO:0010181];identical protein binding [GO:0042802];kinase activity [GO:0016301];mRNA binding [GO:0003729];protein kinase activity [GO:0004672];protein serine/threonine kinase activity [GO:0004674]	+	37	37	35	38.6	38.6	35.8	111.69	0	234.17	18636000000	230	0	23578000	0	12276000	9030000	9024000	18955000	9120500	1812100000	1689600000	1950500000	1795900000	980610000	1031100000	896010000	1119800000	789730000	653890000	779630000
0.36665	0.275237	0.787741	0.615114	-0.724567	-1.0973	-0.900702	-1.31881	1.19499	0.957759	1.48299	1.45446	-0.494654	-1.24392	-0.411684	-0.943306	cell wall modification [GO:0042545];defense response to Gram-negative bacterium [GO:0050829];pectin catabolic process [GO:0045490];response to fungus [GO:0009620];response to nematode [GO:0009624]	apoplast [GO:0048046];cell wall [GO:0005618];cytoplasm [GO:0005737];cytosol [GO:0005829];plasma membrane [GO:0005886]	aspartyl esterase activity [GO:0045330];pectinesterase activity [GO:0030599];pectinesterase inhibitor activity [GO:0046910]	+	22	22	18	40.5	40.5	31.4	64.255	0	297.2	16007000000	221	456800000	511280000	418390000	423510000	825950000	618820000	703660000	954910000	794660000	623770000	1107200000	847330000	223960000	348790000	401500000	337860000	1149900000	872170000	1233100000
-0.801808	-0.106435	-0.693893	-0.983323	0.0241752	-0.0357651	0.273266	0.439101	1.18973	1.77491	1.38449	1.44737	-1.37987	-0.90498	-0.768508	-0.85846	defense response [GO:0006952];response to jasmonic acid [GO:0009753]	vacuole [GO:0005773]	acid phosphatase activity [GO:0003993];nutrient reservoir activity [GO:0045735];transcription factor binding [GO:0008134]	+	9	9	5	31.5	31.5	14.8	30.261	0	88.954	1576300000	61	8818600	42850000	0	0	220340000	132500000	80875000	206310000	35012000	43937000	29303000	15747000	57597000	53906000	49065000	50600000	112310000	104020000	98484000
-1.05489	-2.22004	-1.46524	-1.03345	0.613392	-1.11671	0.504851	0.690759	0.726929	0.411235	0.564568	0.485499	0.852722	0.60157	0.797827	0.640976	cysteine biosynthetic process [GO:0019344];hydrogen sulfide biosynthetic process [GO:0070814];sulfate assimilation [GO:0000103]	chloroplast [GO:0009507];plastid [GO:0009536]	adenylylsulfate kinase activity [GO:0004020];ATP binding [GO:0005524]	+	11	9	9	35.8	32.4	32.4	31.977	0	36.295	1830800000	24	89828000	59175000	28435000	72122000	309470000	119910000	148040000	137340000	0	0	0	0	45734000	22962000	40828000	50207000	78019000	37404000	74995000
-0.850896	-1.42072	-0.597712	-2.31969	0.774539	0.835057	0.943376	0.75661	1.46094	0.0291173	0.678566	0.514707	-0.681569	0.287136	0.161522	-0.570978	CTP biosynthetic process [GO:0006241];GTP biosynthetic process [GO:0006183];purine nucleotide metabolic process [GO:0006163];pyrimidine nucleotide metabolic process [GO:0006220];response to oxidative stress [GO:0006979];UTP biosynthetic process [GO:0006228]	chloroplast thylakoid lumen [GO:0009543];cytosol [GO:0005829];mitochondrial inner membrane [GO:0005743];mitochondrial intermembrane space [GO:0005758];mitochondrion [GO:0005739];plastid [GO:0009536]	ATP binding [GO:0005524];cobalt ion binding [GO:0050897];nucleoside diphosphate kinase activity [GO:0004550];zinc ion binding [GO:0008270]	+	24	24	16	48.7	48.7	36.6	25.734	0	323.31	219410000000	669	10095000000	11378000000	8051100000	8125200000	13425000000	11936000000	11173000000	12976000000	7968300000	7050400000	8379700000	6530900000	6408300000	7813700000	9075300000	8404900000	8805300000	6236200000	9828600000
1.59105	-1.0239	1.55444	1.47963	-0.869598	-1.02885	-0.28917	-0.460786	-0.462733	1.60026	-0.1946	-0.186359	-0.484524	0.143945	-1.26064	-0.108168	'de novo' GDP-L-fucose biosynthetic process [GO:0042351];L-fucose biosynthetic process [GO:0006005]		GDP-L-fucose synthase activity [GO:0050577];isomerase activity [GO:0016853]	+	23	14	14	71.2	59.4	59.4	35.569	0	60.457	3873100000	78	411910000	375720000	330110000	287840000	462620000	605560000	428220000	391390000	55990000	0	55680000	44270000	39748000	55194000	12167000	0	11653000	39568000	64132000
-1.01935	-2.1416	0.47863	0.176818	-0.0419319	-0.831046	-1.26385	-1.29815	0.806325	1.43362	0.912989	0.436365	0.443409	0.637479	0.634467	0.63582		cytosol [GO:0005829]	amino acid binding [GO:0016597]	+	20	20	20	44.6	44.6	44.6	50.402	0	89.116	4309500000	72	540600000	805770000	599130000	544020000	398110000	374640000	326290000	336420000	0	0	25198000	15876000	20380000	4284100	0	2867600	34367000	4005400	52142000
-1.9055	-0.628207	-1.02577	-1.76928	0.468001	1.24522	-0.507445	0.469943	1.07047	-0.579475	0.607705	0.187643	0.0346787	0.126679	0.779633	1.4257	rRNA processing [GO:0006364]	nucleolus [GO:0005730]	ATP binding [GO:0005524];RNA binding [GO:0003723];RNA helicase activity [GO:0003724]	+	14	14	14	19.6	19.6	19.6	93.502	0	12.117	1940300000	25	54483000	82009000	57241000	41374000	138680000	156620000	101680000	148040000	37127000	49623000	63538000	46888000	49480000	95314000	93195000	64298000	105760000	38333000	90093000
1.0972	0.990207	1.19015	1.17265	-0.685097	-1.36722	-1.08306	-1.10021	1.2193	0.287035	0.912891	0.370564	-0.297246	-0.879056	-1.25323	-0.57489		chloroplast [GO:0009507];chloroplast stroma [GO:0009570]	carboxyvinyl-carboxyphosphonate phosphorylmutase activity [GO:0008807]	+	18	15	15	51	51	51	36.565	0	252.79	19616000000	203	0	0	0	0	0	0	0	0	1777800000	1592000000	1736800000	1643200000	747900000	995960000	971830000	946070000	1590600000	897440000	1234200000
-1.36478	-1.11167	0.0694866	0.309082	0.97872	-0.879966	0.664846	0.762331	-1.65892	-1.37006	-0.156699	-0.271763	1.27492	1.20748	0.911857	0.635133	photosynthesis [GO:0015979]	chloroplast [GO:0009507];chloroplast stroma [GO:0009570];chloroplast thylakoid [GO:0009534];chloroplast thylakoid lumen [GO:0009543];cytosol [GO:0005829];extrinsic component of membrane [GO:0019898];mitochondrion [GO:0005739];photosystem II oxygen evolving complex [GO:0009654];thylakoid [GO:0009579];thylakoid lumen [GO:0031977]	calcium ion binding [GO:0005509]	+	12	12	12	47.3	47.3	47.3	28.501	0	66.397	13620000000	128	0	0	20547000	0	99086000	12369000	0	10273000	668140000	676030000	923110000	934320000	659770000	677250000	914240000	835250000	573610000	577340000	733260000
-0.245946	-0.266301	-0.143713	-0.144511	0.282028	0.443503	0.404769	0.176555	-1.395	-1.17789	-1.50223	-1.50904	1.43191	1.20888	1.27868	1.1583	carbohydrate metabolic process [GO:0005975];glucose metabolic process [GO:0006006];response to cadmium ion [GO:0046686]	cytoplasm [GO:0005737];cytosol [GO:0005829];nucleus [GO:0005634];plasma membrane [GO:0005886]	magnesium ion binding [GO:0000287];phosphoglucomutase activity [GO:0004614]	+	86	86	65	97.6	97.6	81.3	63.17	0	323.31	261390000000	1160	25478000000	30962000000	23880000000	21805000000	25789000000	21316000000	23213000000	25307000000	3611900000	3170700000	3457600000	3497100000	3334300000	3959800000	4197300000	4014000000	1882700000	1481400000	1778300000
-2.20797	-1.07988	0.414656	-1.42395	-0.300434	0.840725	-0.89142	0.869011	-0.42478	0.154304	0.0380468	0.0420171	0.870884	1.42937	0.764758	0.90466	abscisic acid-activated signaling pathway [GO:0009738];positive regulation of abscisic acid-activated signaling pathway [GO:0009789];positive regulation of GTPase activity [GO:0043547]	cytosol [GO:0005829];nucleus [GO:0005634];plasma membrane [GO:0005886]	GTPase activator activity [GO:0005096];metal ion binding [GO:0046872];phospholipid binding [GO:0005543]	+	10	10	10	50.9	50.9	50.9	18.569	0	29.115	4981200000	82	208440000	242310000	231780000	214130000	221920000	309910000	247230000	307900000	171530000	158600000	143580000	130400000	122370000	178200000	172970000	197570000	210280000	150590000	211850000
0.0994257	0.35376	0.247156	0.159578	0.510018	0.674823	0.70866	0.777508	-1.69738	-1.49866	-1.61828	-1.71536	0.760172	0.854356	0.660566	0.723659	defense response [GO:0006952]	cytosol [GO:0005829];nucleus [GO:0005634]		+	25	25	24	84.4	84.4	84.4	17.859	0	198.22	56482000000	349	304040000	293120000	296710000	226430000	325520000	318960000	228280000	278060000	3652300000	3312100000	3676500000	3432700000	2961600000	4000600000	4323700000	4075900000	1223800000	788350000	1401600000
1.48072	1.38571	1.62818	1.22939	-0.650037	-0.350686	0.42687	-0.907655	-0.492039	0.292474	-0.349162	-0.193332	-0.709108	-0.312897	-1.95138	-0.527053	defense response [GO:0006952]			+	2	2	2	11.5	11.5	11.5	17.322	0.004366	1.9007	436320000	5	71529000	0	36162000	54409000	9586300	63508000	51330000	9099800	27920000	23289000	34168000	32312000	0	0	0	0	4212800	7626700	5042300
1.25811	1.06425	0.906188	0.989894	-0.47126	-1.68757	0.683427	-0.431685	-0.754031	-0.904005	-1.24748	0.716963	-1.12487	0.694117	-0.714788	1.02274	defense response [GO:0006952];protein phosphorylation [GO:0006468]	peroxisome [GO:0005777];plasma membrane [GO:0005886];plasmodesma [GO:0009506]	ATP binding [GO:0005524];non-membrane spanning protein tyrosine kinase activity [GO:0004715];protein kinase binding [GO:0019901];transmembrane receptor protein serine/threonine kinase activity [GO:0004675]	+	5	5	3	20.2	20.2	15.3	40.5	0	9.3105	678460000	14	108010000	108070000	14803000	32330000	70314000	89223000	77492000	64218000	17672000	13908000	27043000	22978000	0	0	5281900	0	0	0	0
0.438801	-0.159863	-0.174158	-1.00317	1.11535	1.48192	0.664754	0.141113	-0.141507	1.41917	0.598899	0.369269	-1.10799	-0.504977	-2.24307	-0.894533	chloroplast RNA modification [GO:1900865];cytidine to uridine editing [GO:0016554];mitochondrial mRNA modification [GO:0080156];mitochondrial RNA modification [GO:1900864];mRNA processing [GO:0006397]	chloroplast [GO:0009507];mitochondrion [GO:0005739]	protein dimerization activity [GO:0046983]	+	2	2	2	7.6	7.6	7.6	45.157	0	24.541	583110000	15	40820000	13765000	31103000	31889000	79175000	78797000	78145000	67677000	10261000	8441000	9226300	6862600	9838800	11118000	10151000	8677000	21439000	10673000	11572000
1.19824	-1.30934	1.25729	0.218434	-0.647893	0.187524	0.0961278	-0.360875	1.62498	0.111949	1.36666	0.105943	-0.81551	-0.305986	-0.808579	-1.91896		cytosol [GO:0005829];plasma membrane [GO:0005886]	mRNA binding [GO:0003729]	+	19	19	18	85.6	85.6	85.6	16.459	0	323.31	49385000000	307	1347800000	1337700000	1138600000	1066800000	1898700000	1859800000	1754200000	1830800000	2626400000	2334500000	2906500000	2233900000	2180700000	2307900000	2260800000	2392600000	1983400000	1517500000	2263200000
-0.671469	-0.605791	-0.527096	-0.45827	-0.738678	-0.854613	-0.970576	-0.489052	1.60616	1.52903	1.74775	1.68835	-0.435521	-0.259553	-0.284279	-0.276397	lignin biosynthetic process [GO:0009809]	cytosol [GO:0005829]	cinnamyl-alcohol dehydrogenase activity [GO:0045551];oxidoreductase activity, acting on the CH-OH group of donors, NAD or NADP as acceptor [GO:0016616];sinapyl alcohol dehydrogenase activity [GO:0052747];zinc ion binding [GO:0008270]	+	39	37	37	94.7	94.7	94.7	38.743	0	323.31	53610000000	463	6555900000	7190100000	5072400000	5048500000	4653300000	4217000000	4103000000	4244400000	509930000	628090000	614090000	665050000	351460000	374880000	274360000	427950000	1609500000	1274200000	1784100000
1.39022	1.11157	0.404789	0.380552	-0.432935	-0.362655	-1.60604	-1.00505	0.817297	1.12855	1.00195	0.771365	-0.205741	-1.30584	-0.773248	-1.31479	cellular amino acid metabolic process [GO:0006520];embryo development ending in seed dormancy [GO:0009793];L-serine biosynthetic process [GO:0006564];megagametogenesis [GO:0009561];pollen development [GO:0009555];sulfur amino acid metabolic process [GO:0000096]	chloroplast [GO:0009507];chloroplast stroma [GO:0009570];mitochondrion [GO:0005739];plasma membrane [GO:0005886];plastid [GO:0009536]	ATP binding [GO:0005524];NAD binding [GO:0051287];phosphoglycerate dehydrogenase activity [GO:0004617]	+	57	57	48	69.3	69.3	65.3	63.324	0	323.31	321660000000	1312	23303000000	24282000000	19805000000	18131000000	25349000000	24194000000	20488000000	24662000000	10287000000	8945600000	9498400000	9202800000	7045500000	8222400000	7318300000	7516000000	9224800000	7256700000	9941000000
-1.45435	-1.09288	-1.36444	-1.88989	-0.127605	0.426968	-0.281194	0.397217	1.70907	0.515747	1.11825	0.89879	0.439801	-0.145553	0.441208	0.408855	coumarin biosynthetic process [GO:0009805];lignin biosynthetic process [GO:0009809];methylation [GO:0032259];response to cadmium ion [GO:0046686]	cytosol [GO:0005829];plasma membrane [GO:0005886]	caffeoyl-CoA O-methyltransferase activity [GO:0042409];metal ion binding [GO:0046872];S-adenosylmethionine-dependent methyltransferase activity [GO:0008757]	+	38	38	38	98.8	98.8	98.8	29.155	0	323.31	249690000000	1093	29353000000	33711000000	25222000000	24864000000	24106000000	26101000000	23728000000	25802000000	1833800000	1684900000	1947000000	1430800000	1671200000	2035100000	1810000000	2250400000	3258100000	1974700000	3156900000
-1.44152	-1.5928	-0.789767	-1.49744	0.737575	0.7902	1.24265	1.78014	-0.00356061	0.353814	-0.504703	-0.317795	-0.376515	0.24761	0.608323	0.763791	[2Fe-2S] cluster assembly [GO:0044571];iron-sulfur cluster assembly [GO:0016226]	cytosol [GO:0005829];mitochondrion [GO:0005739];plastid [GO:0009536]	ATP binding [GO:0005524];cysteine desulfurase activity [GO:0031071];iron-sulfur cluster binding [GO:0051536];pyridoxal phosphate binding [GO:0030170];zinc ion binding [GO:0008270]	+	38	38	38	80.4	80.4	80.4	50.295	0	323.31	36446000000	374	3266000000	3605700000	3040700000	2831400000	5001900000	4739700000	4235400000	4619400000	257100000	231760000	351530000	223760000	392810000	345200000	318550000	377070000	308230000	299990000	294650000
-2.35184	-0.683726	-2.47407	0.222538	0.435799	0.138959	0.189027	0.366598	0.582012	0.483914	0.799379	0.726173	0.619535	0.456197	0.259984	0.229523	cell differentiation [GO:0030154];floral organ development [GO:0048437];gametophyte development [GO:0048229];hormone-mediated signaling pathway [GO:0009755];regulation of meristem growth [GO:0010075];regulation of meristem structural organization [GO:0009934]	integral component of membrane [GO:0016021];plasma membrane [GO:0005886]	ATP binding [GO:0005524];identical protein binding [GO:0042802];protein self-association [GO:0043621];protein serine/threonine kinase activity [GO:0004674];receptor serine/threonine kinase binding [GO:0033612]	+	5	5	5	4.6	4.6	4.6	109.2	0.00094073	2.4805	1030200000	11	18338000	27349000	94317000	28281000	134650000	149380000	155380000	170450000	0	30145000	0	22691000	8089800	8280300	8917200	10358000	54256000	18905000	15634000
-1.55826	-2.54141	-0.805151	0.301445	0.139062	0.139726	0.59567	-1.10228	0.648279	0.986158	0.93698	0.859353	0.664933	-0.0500444	0.355139	0.430408	embryo development ending in seed dormancy [GO:0009793];nucleotide-excision repair [GO:0006289];proteasome-mediated ubiquitin-dependent protein catabolic process [GO:0043161];protein ubiquitination [GO:0016567];red, far-red light phototransduction [GO:0009585]	cullin-RING ubiquitin ligase complex [GO:0031461];cytosol [GO:0005829];nucleus [GO:0005634]	damaged DNA binding [GO:0003684]	+	31	14	14	29.5	16.5	16.5	121.18	0	20.035	2910400000	82	471970000	275100000	221060000	207750000	313920000	243200000	291680000	269570000	16289000	13223000	19131000	41034000	17852000	18275000	61608000	15747000	47587000	37781000	53651000
-1.61486	-1.22092	-1.32324	-1.29294	0.551859	0.472129	0.170328	0.476095	1.24911	1.32877	1.23991	1.19262	-0.363246	-0.295581	-0.404059	-0.165975		chloroplast [GO:0009507];chloroplast stroma [GO:0009570]	ATP binding [GO:0005524];phosphoprotein phosphatase activity [GO:0004721];phosphotransferase activity, phosphate group as acceptor [GO:0016776];protein kinase activity [GO:0004672];protein serine/threonine kinase activity [GO:0004674]	+	38	38	35	83.9	83.9	83.9	43.683	0	323.31	28990000000	376	29908000	57270000	45255000	100530000	67312000	42905000	36113000	46074000	649650000	720190000	752900000	614630000	1689800000	1805900000	1772800000	1843000000	3610100000	2571300000	3239700000
-0.937384	-0.582801	-1.3333	-1.56205	-0.4351	0.0137051	0.259766	0.305291	-0.491464	-0.090933	-0.319025	-0.509848	1.63738	1.28394	1.85993	0.901891	chromatin assembly or disassembly [GO:0006333]	chromatin [GO:0000785];cytosol [GO:0005829];nucleus [GO:0005634]	chromatin binding [GO:0003682];DNA binding [GO:0003677];DNA-binding transcription factor activity [GO:0003700];structural constituent of chromatin [GO:0030527]	+	5	3	3	30.6	24.3	24.3	15.981	0	10.987	751010000	19	137510000	25970000	10196000	15590000	25724000	30406000	27447000	24971000	8854700	17296000	17793000	14124000	16984000	19102000	13259000	24136000	19780000	16361000	23533000
-1.52088	-1.40848	-1.57222	-1.40212	0.863848	0.305174	0.104311	-0.0861739	0.182098	1.64976	-0.0799066	1.18078	0.922968	0.443828	-0.032667	0.44969	negative regulation of catalytic activity [GO:0043086];response to karrikin [GO:0080167]	vacuole [GO:0005773]	enzyme inhibitor activity [GO:0004857]	+	5	5	5	36.1	36.1	36.1	19.633	0	9.5103	846080000	16	0	0	0	0	0	3609300	0	0	20476000	19708000	21702000	14097000	45134000	61797000	21430000	56079000	63938000	63446000	35909000
-1.725	-1.72741	-1.6713	-1.36745	0.437182	0.56366	0.395551	0.386397	0.177488	0.221826	0.369958	0.36407	0.913486	0.833233	0.835287	0.993023	plant-type cell wall modification [GO:0009827]	plasma membrane [GO:0005886]	serine-type endopeptidase activity [GO:0004252];serine-type peptidase activity [GO:0008236]	+	24	24	24	33.2	33.2	33.2	81.045	0	144.92	14027000000	181	147040000	194630000	174670000	148680000	247760000	276540000	305260000	281890000	99658000	128180000	139720000	160070000	634050000	828240000	957490000	851170000	755140000	408780000	848450000
1.41239	1.65807	1.62535	1.12002	-1.17273	-0.667161	-0.915623	-1.58785	0.379666	0.0110837	-0.129756	-0.0414323	-0.11143	-0.191361	-0.732533	-0.656703		chloroplast [GO:0009507];chloroplast thylakoid [GO:0009534];chloroplast thylakoid membrane [GO:0009535];cytosol [GO:0005829];mitochondrion [GO:0005739];plastoglobule [GO:0010287];thylakoid [GO:0009579];thylakoid lumen [GO:0031977]		+	12	11	11	54.8	50	50	33.655	0	102.2	5670500000	103	321340000	287080000	294230000	269610000	410070000	384020000	341350000	448860000	431030000	258150000	331260000	289190000	242370000	66726000	59864000	61029000	127110000	144860000	158890000
-1.29645	-2.26415	-1.2176	-0.712165	0.958184	0.20165	0.89302	-0.745479	1.06351	-0.26326	0.269715	0.181044	0.218855	1.01316	0.668495	1.03147	tRNA threonylcarbamoyladenosine modification [GO:0002949]	cytosol [GO:0005829];EKC/KEOPS complex [GO:0000408];nucleus [GO:0005634]	metal ion binding [GO:0046872];N(6)-L-threonylcarbamoyladenine synthase activity [GO:0061711]	+	10	10	10	32.6	32.6	32.6	38.767	0	70.028	5280900000	94	293320000	323160000	250150000	302530000	511280000	364460000	359650000	403560000	126450000	63389000	96718000	114170000	105140000	131980000	158880000	142820000	222390000	122910000	200410000
-1.59008	-1.20704	-0.785182	-1.90788	0.752977	0.833664	-0.196496	-0.210997	-0.58101	0.364226	0.211639	0.956376	0.0117023	0.788325	1.48677	1.073	carotene catabolic process [GO:0016121]	chloroplast [GO:0009507];chloroplast stroma [GO:0009570];cytosol [GO:0005829];plastoglobule [GO:0010287]	carotenoid dioxygenase activity [GO:0010436];metal ion binding [GO:0046872]	+	34	34	34	59.8	59.8	59.8	65.601	0	155.45	17323000000	293	4586700	0	3252400	5366900	4980700	0	9838200	8017900	773710000	716870000	726570000	725640000	798380000	1073600000	1123000000	1302600000	940920000	719050000	1196600000
0.0583816	-0.0305864	0.222312	-0.338355	0.360192	0.995375	0.857849	0.36962	-1.38059	-2.09818	-0.841281	-1.43321	1.39	1.22975	0.564405	0.0743132	abscisic acid-activated signaling pathway [GO:0009738];positive regulation of response to water deprivation [GO:1902584];regulation of protein serine/threonine phosphatase activity [GO:0080163]	cytoplasm [GO:0005737];cytosol [GO:0005829];nucleus [GO:0005634];plasma membrane [GO:0005886]	abscisic acid binding [GO:0010427];identical protein binding [GO:0042802];protein homodimerization activity [GO:0042803];protein phosphatase inhibitor activity [GO:0004864];signaling receptor activity [GO:0038023]	+	19	19	17	83.8	83.8	83.8	21.575	0	166.08	19557000000	300	1556400000	1531400000	1182100000	1183700000	1322100000	1287000000	1378600000	1529300000	558030000	374540000	692080000	633040000	449090000	393570000	609900000	573160000	310830000	257720000	338520000
1.50957	0.520426	1.05374	0.715944	-0.968892	-1.09162	-0.762245	-0.834367	1.16104	0.461791	1.1378	0.8897	-0.629762	-1.05971	-0.90906	-1.19434	DNA methylation-dependent heterochromatin assembly [GO:0006346];methionine biosynthetic process [GO:0009086];methylation [GO:0032259];positive regulation of histone H3-K9 methylation [GO:0051574];response to cadmium ion [GO:0046686];response to zinc ion [GO:0010043]	apoplast [GO:0048046];chloroplast [GO:0009507];chloroplast stroma [GO:0009570];cytosol [GO:0005829];extracellular region [GO:0005576];peroxisome [GO:0005777];plasma membrane [GO:0005886];plasmodesma [GO:0009506];vacuolar membrane [GO:0005774]	5-methyltetrahydropteroyltriglutamate-homocysteine S-methyltransferase activity [GO:0003871];copper ion binding [GO:0005507];methionine synthase activity [GO:0008705];zinc ion binding [GO:0008270]	+	122	122	70	90.1	90.1	69.9	84.356	0	323.31	3069400000000	5957	165510000000	180480000000	152820000000	140530000000	182870000000	176760000000	169060000000	171530000000	121440000000	106440000000	125750000000	118380000000	76602000000	90039000000	90262000000	95613000000	125550000000	83604000000	120790000000
1.94434	1.58952	0.283351	0.0947879	-0.917994	-0.58538	-1.85694	-1.06883	0.842547	-0.259601	-0.340376	-0.43436	0.932771	-0.0986973	0.592516	-0.717647	arginine biosynthetic process via ornithine [GO:0042450];citrulline biosynthetic process [GO:0019240]	chloroplast [GO:0009507];chloroplast stroma [GO:0009570];intracellular membrane-bounded organelle [GO:0043231]	amino acid binding [GO:0016597];ornithine carbamoyltransferase activity [GO:0004585]	+	26	26	26	55.5	55.5	55.5	41.002	0	155.18	28306000000	389	1350700000	1044400000	993000000	742110000	1218700000	936840000	1044500000	1039900000	1547800000	1468000000	1539000000	1385200000	963750000	999120000	959780000	952230000	1553100000	1030000000	1334700000
0.99926	1.08152	0.847538	1.14944	-0.135108	-0.270506	-0.951053	-0.056016	-0.185222	0.255668	-1.39254	0.792559	-2.58238	0.35942	0.446542	-0.359127	translation [GO:0006412]	chloroplast [GO:0009507];chloroplast stroma [GO:0009570];chloroplast thylakoid membrane [GO:0009535];cytosolic ribosome [GO:0022626];extracellular region [GO:0005576];nucleus [GO:0005634];plastid large ribosomal subunit [GO:0000311];thylakoid [GO:0009579]	poly(U) RNA binding [GO:0008266];rRNA binding [GO:0019843];structural constituent of ribosome [GO:0003735]	+	3	3	3	12.4	12.4	12.4	30.558	0	7.3966	277710000	12	24855000	17308000	0	7102400	33250000	44488000	28852000	15571000	28884000	7079900	20516000	9072100	0	5054300	0	0	0	6436300	10843000
-0.314909	-0.305235	0.782498	1.05828	-0.940065	-1.93024	-0.198516	-0.729437	0.632071	0.596837	1.71283	1.51505	-0.701284	-0.366658	-1.09634	0.285121	formation of translation preinitiation complex [GO:0001731];positive regulation of translational fidelity [GO:0045903]	cytoplasm [GO:0005737];cytosol [GO:0005829];eukaryotic translation initiation factor 2 complex [GO:0005850];extracellular region [GO:0005576]	GTP binding [GO:0005525];GTPase activity [GO:0003924];translation initiation factor activity [GO:0003743]	+	34	34	34	59.1	59.1	59.1	50.853	0	233.13	41620000000	448	1989200000	2142500000	1830000000	2088000000	2860300000	3122200000	2424100000	3336800000	1258800000	1299300000	1806500000	1629300000	966100000	923390000	1115200000	1130000000	1620800000	1007700000	1814300000
1.28747	1.87683	1.58113	0.605808	0.0469739	-0.0248314	-0.595483	0.134187	0.376733	-1.25954	-1.53247	-0.540348	-0.428895	-1.42058	-0.0308487	-0.0761367	defense response [GO:0006952];positive regulation of programmed cell death [GO:0043068];protein autoprocessing [GO:0016540]	cytoplasm [GO:0005737];cytosol [GO:0005829];mitochondrion [GO:0005739];plasma membrane [GO:0005886];plasmodesma [GO:0009506]	cysteine-type endopeptidase activity [GO:0004197];cysteine-type peptidase activity [GO:0008234];identical protein binding [GO:0042802]	+	46	46	46	79.7	79.7	79.7	45.483	0	323.31	60270000000	508	4563500000	5528000000	4285000000	4466600000	7414400000	7056400000	7125700000	7144100000	746840000	746140000	837420000	630290000	609120000	628770000	522900000	584680000	1685400000	975180000	1354800000
-1.31327	-1.58088	-1.15406	-1.67066	-0.758122	0.207417	0.410743	-0.0180652	1.50548	0.474001	0.983371	1.1813	0.125816	0.415787	0.83496	0.356181	embryo development ending in seed dormancy [GO:0009793];transsulfuration [GO:0019346]	chloroplast [GO:0009507];cytosol [GO:0005829];mitochondrion [GO:0005739]	3-mercaptopyruvate sulfurtransferase activity [GO:0016784];sulfurtransferase activity [GO:0016783];thiosulfate sulfurtransferase activity [GO:0004792]	+	31	31	30	79.7	79.7	78.1	41.893	0	323.31	84438000000	646	5604300000	4633500000	4054900000	3639000000	5434300000	4949700000	4673700000	5644800000	2562200000	2178600000	2627100000	2125600000	2062600000	2561600000	2823900000	2774000000	3310500000	2380500000	3351300000
-1.19351	-0.471037	-0.751055	-1.18022	0.68074	0.46065	-0.023385	0.460046	-0.875421	-0.0787404	-1.44411	-0.76673	1.35902	1.01904	1.75192	1.05279	catabolic process [GO:0009056]		hydrolase activity [GO:0016787];methyl indole-3-acetate esterase activity [GO:0080030]	+	12	12	12	42.2	42.2	42.2	36.424	0	59.719	3397000000	61	0	0	0	0	0	0	0	0	175450000	219620000	153370000	126390000	249820000	270030000	147130000	255810000	174590000	170820000	172390000
0.0823371	-1.55817	-1.29492	-1.13436	-2.20916	0.327192	0.28883	0.235108	1.01469	0.978419	0.385432	0.860593	0.431915	1.10039	0.447344	0.0443694	acetyl-CoA biosynthetic process from pyruvate [GO:0006086];glycolytic process [GO:0006096];pollen tube development [GO:0048868]	chloroplast envelope [GO:0009941];endoplasmic reticulum [GO:0005783]	pyruvate dehydrogenase (acetyl-transferring) activity [GO:0004739];zinc ion binding [GO:0008270]	+	16	4	4	28.1	4.7	4.7	44.015	0	29.051	1176000000	24	50361000	64373000	68887000	113380000	68423000	93314000	102970000	95689000	9629800	0	0	0	0	18891000	42115000	49845000	102790000	121940000	28852000
1.42144	1.28399	1.06877	0.682186	-0.477212	-0.478821	-0.121134	-1.05018	0.0443669	1.55732	0.00581963	0.487804	-0.870719	-1.75807	-1.00387	-0.791692		anchored component of membrane [GO:0031225];endoplasmic reticulum [GO:0005783];plant-type cell wall [GO:0009505];plasma membrane [GO:0005886]		+	14	14	12	38.9	38.9	34.2	43.943	0	76.986	2977300000	64	11275000	0	14962000	0	0	0	4355000	0	291260000	236170000	278760000	225910000	125660000	108300000	156160000	166740000	225680000	127280000	220720000
-1.00392	-0.967095	-1.51307	-0.978963	0.0622291	0.176062	0.628889	0.402051	-0.124004	-0.308641	-1.22885	-0.47975	1.0414	1.13019	1.56499	1.5985	nitrogen compound metabolic process [GO:0006807];positive regulation of catalytic activity [GO:0043085]		GTP binding [GO:0005525];GTPase activity [GO:0003924];nickel cation binding [GO:0016151]	+	21	21	21	90.5	90.5	90.5	30.082	0	225.69	10630000000	125	1277400000	1187800000	1117700000	890340000	1159000000	999910000	1145900000	1297600000	35858000	35826000	50471000	31848000	77609000	69241000	100560000	111060000	63158000	58008000	31960000
0.654152	1.39462	1.21168	-0.123176	0.193581	-0.656948	0.0106552	-0.412461	-0.688168	-1.27232	-1.00717	-2.16963	0.227324	0.438789	0.980736	1.21834	cellular response to light stimulus [GO:0071482];peptidyl-threonine dephosphorylation [GO:0035970];thylakoid membrane organization [GO:0010027]	chloroplast [GO:0009507];chloroplast stroma [GO:0009570]	metal ion binding [GO:0046872];phosphoprotein phosphatase activity [GO:0004721]	+	8	8	8	28.2	28.2	28.2	32.284	0	51.298	5267800000	74	0	0	0	0	11093000	6670300	0	8098800	363480000	365960000	389390000	289900000	284400000	310310000	320430000	336550000	281310000	124580000	262970000
0.566076	0.985396	0.921857	1.42159	-0.371209	-0.690216	-1.07348	-0.589267	0.783166	1.22208	0.407237	0.978654	-1.16954	-1.19623	-1.47445	-0.721671	regulation of flower development [GO:0009909]	cytoplasm [GO:0005737];cytosol [GO:0005829];intracellular membrane-bounded organelle [GO:0043231];nucleus [GO:0005634]	UDP-glycosyltransferase activity [GO:0008194]	+	23	23	23	40.2	40.2	40.2	51.728	0	103.21	10303000000	251	547230000	532910000	565660000	498260000	372970000	456600000	277800000	414490000	509670000	575260000	596910000	675640000	262950000	309510000	247020000	326560000	454610000	400820000	466520000
0.756509	0.26698	0.320089	0.636514	-2.40157	-1.50537	0.271935	-0.750422	0.117923	-1.32458	0.74812	1.45721	0.00411036	0.678006	0.408475	0.316074	embryo development ending in seed dormancy [GO:0009793];polar nucleus fusion [GO:0010197]	cell wall [GO:0005618];extracellular region [GO:0005576];plasmodesma [GO:0009506]	cinnamyl-alcohol dehydrogenase activity [GO:0045551];coniferyl-alcohol dehydrogenase activity [GO:0050268];FAD binding [GO:0071949];sinapyl alcohol dehydrogenase activity [GO:0052747]	+	23	22	19	45.1	45.1	40.4	59.646	0	97.973	8468500000	164	678030000	873070000	736700000	830010000	622210000	842220000	749320000	697920000	152160000	191700000	178740000	162900000	39576000	95295000	106680000	161330000	144500000	54914000	162700000
-1.05242	-1.02432	-0.523026	-0.797622	0.2243	-0.397814	0.021778	-0.324214	1.34679	1.67268	1.64892	1.63608	-0.29553	-0.732793	-0.659178	-0.743641	response to jasmonic acid [GO:0009753];response to wounding [GO:0009611]	cell wall [GO:0005618];extracellular region [GO:0005576]	FAD binding [GO:0071949];oxidoreductase activity [GO:0016491]	+	28	28	27	47	47	45.7	61.306	0	65.878	14111000000	236	168030000	195840000	189700000	118830000	115850000	109880000	101230000	87025000	740880000	621990000	892780000	757410000	555230000	573620000	726920000	740050000	1144400000	839970000	1243100000
0.953039	0.607553	0.996966	1.67474	-1.33352	-1.50745	-1.43737	-0.312878	0.856902	-0.846034	0.158425	0.97082	-0.685239	-0.651961	-0.0702052	0.626211	defense response to fungus [GO:0050832];response to oomycetes [GO:0002239]	cell wall [GO:0005618]		+	19	19	19	25.2	25.2	25.2	100.28	0	94.03	3756900000	121	27362000	71999000	0	29243000	0	0	9702300	13340000	300810000	245420000	305650000	352730000	139410000	159810000	138120000	174450000	200620000	135660000	246240000
-0.044378	0.909561	-0.168159	-0.185092	-0.623343	1.30802	0.345326	0.213296	-0.468695	-1.31191	-1.21443	-2.27948	1.1307	0.728738	0.679463	0.980367		cytosol [GO:0005829];endoplasmic reticulum [GO:0005783];mitochondrial matrix [GO:0005759];mitochondrion [GO:0005739]	oxidoreductase activity, acting on a sulfur group of donors, disulfide as acceptor [GO:0016671]	+	10	10	10	45.9	45.9	45.9	21.191	0	17.724	4859100000	113	167450000	149100000	107440000	128430000	380540000	275760000	302680000	301330000	203180000	226110000	184310000	235630000	137560000	188740000	162720000	169250000	170340000	130350000	165980000
0.217455	0.860328	0.49638	-1.30692	-0.371194	-0.0276065	1.50604	0.534826	-1.15429	-1.54399	-1.08977	-1.34307	0.428944	0.882664	1.14228	0.767932	embryo development ending in seed dormancy [GO:0009793];embryo sac development [GO:0009553];pollen development [GO:0009555];UDP-glucose metabolic process [GO:0006011];UDP-N-acetylgalactosamine metabolic process [GO:0019276];UDP-N-acetylglucosamine biosynthetic process [GO:0006048];UDP-N-acetylglucosamine metabolic process [GO:0006047]	cytoplasm [GO:0005737]	UDP-N-acetylgalactosamine diphosphorylase activity [GO:0052630];UDP-N-acetylglucosamine diphosphorylase activity [GO:0003977];uridylyltransferase activity [GO:0070569];UTP:glucose-1-phosphate uridylyltransferase activity [GO:0003983]	+	18	7	7	43.6	23.7	23.7	55.759	0	33.271	2169800000	42	63331000	67487000	57167000	62557000	105440000	108850000	84618000	92095000	130420000	156620000	121710000	94636000	75845000	94008000	91184000	60213000	50832000	41963000	52945000
1.63633	1.65492	1.67262	0.903031	-1.26649	-0.880836	-0.884823	-0.645981	0.223672	-1.29301	-0.164912	0.0151292	-0.709574	0.0164656	-0.360897	0.0843669	purine nucleotide biosynthetic process [GO:0006164]		IMP cyclohydrolase activity [GO:0003937];phosphoribosylaminoimidazolecarboxamide formyltransferase activity [GO:0004643]	+	56	56	56	85.7	85.7	85.7	59.471	0	323.31	102120000000	1128	2952000000	3531200000	3157300000	2537700000	3218900000	3392500000	3250500000	3493000000	6524900000	6011700000	6900000000	5791300000	2854400000	3763900000	3447300000	3558500000	4929300000	3115600000	4923600000
-0.30026	-0.802047	0.0945429	-0.843614	-0.443227	-0.311276	-0.137902	-1.42374	1.02075	2.27502	1.379	1.16938	-0.303822	0.227719	-0.416313	-1.1842	secondary metabolic process [GO:0019748]	extracellular region [GO:0005576]	serine-type carboxypeptidase activity [GO:0004185];transferase activity, transferring acyl groups other than amino-acyl groups [GO:0016747]	+	13	8	8	30.4	26.1	26.1	49.784	0	23.529	1723700000	25	34923000	9836100	0	37097000	0	29236000	8457700	36923000	53977000	69382000	62143000	48496000	74275000	55758000	25649000	72662000	160100000	177890000	164540000
-0.781765	-1.2366	-1.73242	-0.722518	-0.356599	-0.15173	-0.507063	-0.13979	0.69801	1.63063	1.67854	1.64641	-0.423485	0.148714	0.0890977	0.160577	secondary metabolic process [GO:0019748]	extracellular region [GO:0005576]	serine-type carboxypeptidase activity [GO:0004185];sinapoylglucose-sinapoylglucose O-sinapoyltransferase activity [GO:0047158];transferase activity, transferring acyl groups other than amino-acyl groups [GO:0016747]	+	6	4	4	18.3	15.1	15.1	49.755	0	7.21	855400000	25	8063400	6862100	5904500	13833000	0	0	10768000	11130000	43717000	43166000	41398000	32607000	41708000	37830000	39273000	40832000	60533000	45474000	82393000
-0.637718	0.733286	-0.696263	-1.20526	-1.71575	0.824114	-1.49948	-0.42868	0.289576	-0.657932	0.932357	1.37411	0.887349	0.329878	0.0982243	1.3722	lipid transport [GO:0006869]	anchored component of membrane [GO:0031225];cytosol [GO:0005829];integral component of membrane [GO:0016021];plasma membrane [GO:0005886]	lipid binding [GO:0008289]	+	1	1	1	5.4	5.4	5.4	21.706	0.002037	2.1922	188790000	14	0	0	0	0	0	0	0	0	10995000	13742000	11547000	9389100	6061200	12500000	0	9822600	13190000	7602500	15454000
-1.3534	-1.8215	0.20513	-0.206843	-0.854245	-0.664146	0.967676	-1.21389	0.41328	-0.18406	1.28368	-0.0718892	0.157263	1.43393	0.494005	1.415		cytosol [GO:0005829]	calcium ion binding [GO:0005509]	+	3	3	3	17.6	17.6	17.6	15.821	0	5.444	737190000	16	7870900	0	6713300	0	13545000	21240000	21680000	19458000	22879000	22350000	43271000	22441000	22160000	16305000	36915000	24318000	46905000	23591000	61412000
1.52939	1.44901	0.716157	0.229725	0.535924	1.25475	0.457065	0.0366225	-1.74303	-0.360546	-1.5404	-1.39878	-0.406238	-0.391392	-0.325901	-0.0423608	carbohydrate metabolic process [GO:0005975];defense response by callose deposition in cell wall [GO:0052544];defense response to bacterium [GO:0042742];defense response to fungus, incompatible interaction [GO:0009817];glucosinolate catabolic process [GO:0019762];glucosinolate metabolic process [GO:0019760];indole glucosinolate catabolic process [GO:0042344];induced systemic resistance [GO:0009682…	chloroplast envelope [GO:0009941];membrane [GO:0016020];peroxisome [GO:0005777]	beta-glucosidase activity [GO:0008422];scopolin beta-glucosidase activity [GO:0102483];thioglucosidase activity [GO:0019137]	+	23	22	22	40.4	39.1	39.1	63.915	0	116.61	11732000000	176	1077500000	1196700000	917400000	801690000	1180400000	1093300000	980650000	1070400000	410150000	256800000	333660000	292490000	168890000	176460000	129160000	136530000	114000000	129530000	184100000
1.64007	1.53388	1.85201	1.42044	-0.305891	-0.101249	-0.443365	-0.335515	-0.329087	-1.00431	-0.705964	-0.880648	-0.383624	-0.608175	-0.300408	-1.04817	auxin-activated signaling pathway [GO:0009734];CTP biosynthetic process [GO:0006241];GTP biosynthetic process [GO:0006183];purine nucleotide metabolic process [GO:0006163];pyrimidine nucleotide metabolic process [GO:0006220];red, far-red light phototransduction [GO:0009585];response to hydrogen peroxide [GO:0042542];response to UV [GO:0009411];UTP biosynthetic process [GO:0006228]	chloroplast [GO:0009507];chloroplast envelope [GO:0009941];chloroplast stroma [GO:0009570];cytoplasm [GO:0005737];nucleus [GO:0005634];plastid [GO:0009536];thylakoid [GO:0009579]	ATP binding [GO:0005524];metal ion binding [GO:0046872];nucleoside diphosphate kinase activity [GO:0004550]	+	23	23	23	45	45	45	25.55	0	226.03	73320000000	331	151200000	191020000	102120000	54969000	157910000	175200000	146210000	127850000	6552900000	5614500000	6735700000	5986100000	3227900000	3716000000	4027200000	3965800000	4491200000	3071100000	3903600000
0.450206	0.3791	-0.240936	-1.17059	0.433967	0.753913	1.14141	1.54221	-0.559926	-1.50859	-1.36267	-1.32626	0.52286	-0.753524	1.23537	0.463463	protein modification by small protein conjugation [GO:0032446];protein neddylation [GO:0045116]	cytoplasm [GO:0005737];cytosol [GO:0005829];nucleus [GO:0005634]	ATP binding [GO:0005524];NEDD8 activating enzyme activity [GO:0019781];protein heterodimerization activity [GO:0046982]	+	32	32	32	57.5	57.5	57.5	50.541	0	136.56	22571000000	402	1223800000	1124800000	1054000000	1016600000	1283700000	1443200000	1414700000	1352000000	901650000	846400000	835010000	618080000	766770000	746790000	822680000	744770000	778960000	537060000	733280000
1.46397	1.90048	1.53653	1.00344	-0.94004	-1.36129	0.301472	0.0704115	-0.110437	-0.763281	0.00527603	-0.0485825	-0.952736	-0.501036	-0.833288	-0.770884	fatty acid beta-oxidation [GO:0006635];fatty acid beta-oxidation using acyl-CoA oxidase [GO:0033540];lipid homeostasis [GO:0055088];long-chain fatty acid metabolic process [GO:0001676]	peroxisome [GO:0005777]	acyl-CoA oxidase activity [GO:0003997];FAD binding [GO:0071949];fatty acid binding [GO:0005504];flavin adenine dinucleotide binding [GO:0050660]	+	28	28	28	41.9	41.9	41.9	77.479	0	63.177	6144200000	92	814270000	592960000	453690000	450640000	768850000	816820000	717570000	884190000	123060000	108160000	188660000	96557000	2888500	0	8823200	21353000	23745000	6950300	24220000
1.55281	1.56065	1.61236	1.49059	-0.690871	-0.814406	-0.970649	-0.955012	0.0630797	0.0714913	0.0890322	0.0201031	-0.740904	-0.835174	-0.819238	-0.633865	fatty acid beta-oxidation [GO:0006635];fatty acid beta-oxidation using acyl-CoA oxidase [GO:0033540];jasmonic acid biosynthetic process [GO:0009695];lipid homeostasis [GO:0055088];long-chain fatty acid metabolic process [GO:0001676];response to cadmium ion [GO:0046686];response to fungus [GO:0009620];response to wounding [GO:0009611]	cytosol [GO:0005829];peroxisome [GO:0005777];plasmodesma [GO:0009506]	acyl-CoA oxidase activity [GO:0003997];FAD binding [GO:0071949];fatty acid binding [GO:0005504];flavin adenine dinucleotide binding [GO:0050660]	+	48	48	41	61.4	61.4	53.8	74.301	0	323.31	60497000000	613	3415600000	3570700000	2888400000	2871800000	2992900000	2881900000	2730800000	2743800000	4982200000	4669800000	4545300000	4134100000	969070000	1122600000	1116400000	1177500000	2234600000	1493600000	2290500000
1.35324	1.07357	0.926214	0.67789	-1.33059	-0.203795	-2.56103	-0.872229	-0.216283	-0.165545	-0.413918	-0.350408	0.745583	0.282309	0.585379	0.469618	polysaccharide catabolic process [GO:0000272]	chloroplast [GO:0009507];chloroplast stroma [GO:0009570]	amylopectin maltohydrolase activity [GO:0102229];beta-amylase activity [GO:0016161]	+	33	33	33	57.6	57.6	57.6	61.397	0	323.31	22460000000	358	29055000	17545000	32902000	23640000	0	21334000	21684000	31133000	1956500000	1650000000	1826000000	1456900000	960700000	1106000000	1027000000	1190600000	1357100000	943970000	1196100000
1.66585	1.85947	1.2667	1.22676	-1.24431	-0.25497	0.198783	-1.19123	-0.136324	-0.554758	0.0727186	-0.953392	-0.827007	-0.357303	-0.729444	-0.0415354	one-carbon metabolic process [GO:0006730];photorespiration [GO:0009853];tetrahydrofolate interconversion [GO:0035999]	chloroplast [GO:0009507];cytosol [GO:0005829]	methenyltetrahydrofolate cyclohydrolase activity [GO:0004477];methylenetetrahydrofolate dehydrogenase (NADP+) activity [GO:0004488]	+	20	20	20	69.2	69.2	69.2	38.741	0	186.33	17985000000	308	461360000	511160000	416540000	387630000	751690000	648420000	563620000	662110000	1082100000	971380000	1125100000	1024600000	494230000	660830000	657100000	605280000	986140000	583940000	950370000
1.3822	2.17492	1.02653	0.834976	-0.168099	0.0566871	-0.842738	-0.489483	0.250754	0.0466042	0.0639731	0.10588	-0.725645	-1.73314	-0.834677	-1.14875	chaperone cofactor-dependent protein refolding [GO:0051085];negative regulation of abscisic acid-activated signaling pathway [GO:0009788];positive regulation of superoxide dismutase activity [GO:1901671];protein heterotetramerization [GO:0051290];response to cadmium ion [GO:0046686];response to cold [GO:0009409]	apoplast [GO:0048046];chloroplast [GO:0009507];chloroplast envelope [GO:0009941];chloroplast stroma [GO:0009570];chloroplast thylakoid membrane [GO:0009535];mitochondrial matrix [GO:0005759];mitochondrion [GO:0005739];plastid [GO:0009536];thylakoid [GO:0009579]	ATP binding [GO:0005524];chaperone binding [GO:0051087];copper ion binding [GO:0005507];metal ion binding [GO:0046872];unfolded protein binding [GO:0051082]	+	42	42	42	77.1	77.1	77.1	26.802	0	323.31	224680000000	927	2090500000	2352300000	1812800000	1914500000	3296400000	3029400000	2837600000	3031000000	15081000000	14766000000	16296000000	14788000000	9123200000	10433000000	10524000000	10222000000	12925000000	9590900000	13889000000
-1.71326	-1.73277	-1.3132	-1.2434	0.139648	0.131876	-0.129947	-0.0198088	1.23917	0.282423	1.14572	1.19355	0.499387	0.141867	0.40209	0.976642	mucilage extrusion from seed coat [GO:0080001];mucilage metabolic process involved in seed coat development [GO:0048359];seed coat development [GO:0010214]	apoplast [GO:0048046];cell wall [GO:0005618];extracellular region [GO:0005576];secretory vesicle [GO:0099503]	serine-type endopeptidase activity [GO:0004252]	+	31	31	31	47.2	47.2	47.2	79.414	0	323.31	68497000000	599	1939800000	2111500000	1875600000	1489200000	2301500000	2015300000	1919800000	2094100000	2614500000	2216200000	2911900000	2796900000	2453700000	2660900000	2947600000	3090900000	4013100000	2351600000	4016600000
-0.315572	-0.883446	-1.54053	-2.40534	0.931228	0.807726	0.512088	0.841148	0.53549	1.61398	-0.262776	-0.0669043	0.499472	-0.483181	0.1046	0.112023	methylglyoxal catabolic process to D-lactate via S-lactoyl-glutathione [GO:0019243];response to cadmium ion [GO:0046686]	chloroplast envelope [GO:0009941];cytoplasm [GO:0005737];cytosol [GO:0005829];extracellular region [GO:0005576];peroxisome [GO:0005777];plasma membrane [GO:0005886];secretory vesicle [GO:0099503];vacuole [GO:0005773]	dioxygenase activity [GO:0051213];lactoylglutathione lyase activity [GO:0004462];metal ion binding [GO:0046872]	+	37	35	35	67.1	67.1	67.1	31.928	0	323.31	300640000000	902	14398000000	15557000000	12062000000	12451000000	17876000000	19069000000	18853000000	21097000000	10274000000	9226200000	10774000000	10033000000	7865200000	8911300000	10764000000	10035000000	11730000000	8193900000	12007000000
-0.0410002	-0.932754	-0.61258	-0.635875	-1.02966	-1.75279	-0.23864	-1.50576	0.790372	0.322535	1.19742	1.59121	0.81081	0.498494	0.536202	1.00202		cytosol [GO:0005829]	oxidoreductase activity [GO:0016491]	+	27	27	27	78.8	78.8	78.8	34.465	0	316.76	66288000000	500	3994400000	3127400000	2859200000	2983200000	3340600000	3006700000	2369400000	2538400000	3036200000	2459800000	2734800000	2891200000	1807000000	2171700000	2663500000	2475500000	2649600000	1803700000	2966800000
-1.90141	-0.922687	-1.94756	-1.03167	0.782482	0.129549	0.094709	0.594403	0.26121	1.39473	-0.17666	0.913393	1.22992	0.531908	0.0902211	-0.0425368	iron ion homeostasis [GO:0055072];iron ion transport [GO:0006826]	plasma membrane [GO:0005886];plasmodesma [GO:0009506]	copper ion binding [GO:0005507];ferroxidase activity [GO:0004322]	+	13	12	12	28.1	25.1	25.1	60.455	0	71.558	10628000000	144	232980000	318520000	203940000	210810000	426370000	306690000	436710000	319950000	452420000	404070000	461710000	439660000	382260000	343580000	425150000	481290000	566440000	421430000	579430000
-1.2577	-0.958223	-0.777247	-1.21211	1.91303	1.5656	-0.131717	0.599448	-0.129763	1.72192	-0.264045	-0.145107	-0.748447	0.373658	-0.363787	-0.185514	programmed cell death [GO:0012501];response to salicylic acid [GO:0009751];systemic acquired resistance [GO:0009627]	apoplast [GO:0048046];secretory vesicle [GO:0099503]		+	7	7	7	36.2	36.2	36.2	29.722	0	169.8	18520000000	82	0	0	0	0	0	0	0	0	1203000000	994820000	904170000	1133300000	1053500000	921890000	1218000000	1349000000	1263400000	1215500000	1298700000
-0.744054	-0.425374	-0.715516	-0.885167	-0.211451	-0.174345	-0.404715	-0.114043	3.43729	0.822964	0.0895745	0.0925908	-0.127352	-0.073896	-0.39968	-0.166822	fructose 1,6-bisphosphate metabolic process [GO:0030388];gluconeogenesis [GO:0006094];glycolytic process [GO:0006096]	cytosol [GO:0005829]	fructose-bisphosphate aldolase activity [GO:0004332]	+	49	46	45	89.7	89.7	89.7	38.293	0	323.31	281010000000	1159	61314000	10201000	152880000	55491000	202180000	40257000	15669000	19821000	17212000000	15376000000	18576000000	15957000000	14855000000	17918000000	17256000000	17935000000	20703000000	14258000000	19381000000
-1.32914	-1.18408	-0.547356	-0.353987	-0.98069	-0.435339	0.478711	-0.00759666	2.48157	-0.512421	1.31935	0.246868	-0.406339	0.593468	-0.4175	1.05448	cold acclimation [GO:0009631];DNA duplex unwinding [GO:0032508];response to cold [GO:0009409];response to salt stress [GO:0009651];response to water deprivation [GO:0009414];RNA secondary structure unwinding [GO:0010501]	cytoplasm [GO:0005737];nucleus [GO:0005634];plasma membrane [GO:0005886]	double-stranded DNA binding [GO:0003690];mRNA binding [GO:0003729];nucleic acid binding [GO:0003676];RNA binding [GO:0003723];single-stranded DNA binding [GO:0003697];zinc ion binding [GO:0008270]	+	20	20	20	77.9	77.9	77.9	30.087	0	323.31	27517000000	353	1677400000	2063300000	1439400000	1509800000	2525500000	2116900000	2373100000	2401700000	646120000	573210000	777090000	670380000	510670000	586490000	656740000	692760000	983130000	529350000	897260000
-0.238602	-1.38717	-1.60025	-1.32798	1.25787	-0.340757	1.39998	-0.118881	0.177427	1.9749	-0.383819	-0.676763	0.110149	0.427086	0.248527	0.478295	positive regulation of leaf senescence [GO:1900057];response to hydroperoxide [GO:0033194]		pinoresinol reductase activity [GO:0010283]	+	9	9	9	35.9	35.9	35.9	34.071	0	11.361	2225100000	38	244980000	218330000	24499000	93872000	76327000	83242000	123650000	51723000	130830000	59524000	113580000	30978000	32795000	48036000	141310000	41697000	64751000	170120000	48272000
0.257169	-2.44436	0.151193	-1.14895	0.306644	-1.8903	-0.613729	0.596384	0.811495	0.824479	0.586059	0.690281	0.441415	0.75562	0.160107	0.516487	ribosome biogenesis [GO:0042254];rRNA processing [GO:0006364]	chloroplast [GO:0009507]	ribosomal small subunit binding [GO:0043024]	+	3	3	3	19.5	19.5	19.5	24.289	0.00019223	2.8374	316000000	19	0	0	0	0	0	0	0	0	26917000	0	19813000	0	20386000	0	0	32003000	45714000	24255000	35706000
-0.728578	-1.66535	-1.10545	-1.1212	0.356726	1.3161	1.45708	1.74828	0.178368	0.12567	-0.169872	0.784285	0.2861	0.095138	-0.476389	-1.08089	cellular response to unfolded protein [GO:0034620];chaperone cofactor-dependent protein refolding [GO:0051085];protein refolding [GO:0042026];response to cadmium ion [GO:0046686];response to heat [GO:0009408];response to karrikin [GO:0080167];response to unfolded protein [GO:0006986];response to virus [GO:0009615]	apoplast [GO:0048046];cell wall [GO:0005618];chloroplast [GO:0009507];cytoplasm [GO:0005737];cytosol [GO:0005829];cytosolic ribosome [GO:0022626];Golgi apparatus [GO:0005794];nuclear matrix [GO:0016363];plasma membrane [GO:0005886];plasmodesma [GO:0009506];vacuolar membrane [GO:0005774];vacuole [GO:0005773]	ATP binding [GO:0005524];ATPase activity [GO:0016887];heat shock protein binding [GO:0031072];misfolded protein binding [GO:0051787];protease binding [GO:0002020];protein folding chaperone [GO:0044183];unfolded protein binding [GO:0051082]	+	85	41	40	82.1	41.4	40.4	71.147	0	323.31	426670000000	1322	18514000000	21278000000	17064000000	16817000000	16748000000	17913000000	16917000000	18905000000	17982000000	17067000000	19555000000	18166000000	12812000000	16579000000	16952000000	17036000000	18549000000	12962000000	19363000000
0.375841	0.393248	-0.0370644	-0.265429	1.51574	1.39609	0.831313	1.08608	-1.91464	-1.02319	-1.42743	-1.25413	-0.258508	0.178656	0.27863	0.124783	actin cytoskeleton organization [GO:0030036];actin polymerization or depolymerization [GO:0008154];cell morphogenesis [GO:0000902];establishment or maintenance of cell polarity [GO:0007163];regulation of adenylate cyclase activity [GO:0045761];unidimensional cell growth [GO:0009826]	cortical actin cytoskeleton [GO:0030864];cytosol [GO:0005829]	actin binding [GO:0003779];adenylate cyclase binding [GO:0008179]	+	64	64	64	88	88	88	50.969	0	323.31	106070000000	802	6499700000	8176100000	6962500000	6689700000	9662500000	9945500000	8377200000	9412300000	2804900000	2588000000	2968000000	2683800000	2199500000	2546300000	2748400000	2577400000	1972100000	1744700000	2182900000
0.7374	1.65553	0.373039	1.00792	0.308615	-0.791236	0.210785	-0.431912	-0.843428	-2.44633	-0.326909	-1.14563	0.329876	0.0688314	0.125741	1.1677	cellular response to light intensity [GO:0071484];cellular response to oxidative stress [GO:0034599];cellular response to ozone [GO:0071457];cellular response to salt stress [GO:0071472];cellular response to sucrose stimulus [GO:0071329];cellular response to UV-B [GO:0071493];gene silencing by miRNA [GO:0035195];removal of superoxide radicals [GO:0019430];response to copper ion [GO:0046688];respo…	apoplast [GO:0048046];chloroplast [GO:0009507];chloroplast stroma [GO:0009570];extracellular region [GO:0005576];extracellular space [GO:0005615];thylakoid [GO:0009579]	copper ion binding [GO:0005507];superoxide dismutase activity [GO:0004784]	+	11	11	11	69.9	69.9	69.9	22.244	0	323.31	262540000000	532	261890000	583640000	387820000	530450000	625060000	442160000	364090000	565100000	17065000000	19194000000	18814000000	18125000000	11824000000	12899000000	15244000000	13889000000	15693000000	7727600000	15919000000
-0.688019	-1.37598	-0.601465	-0.480011	-0.0732594	-0.0675881	-0.134719	-0.243526	1.38116	1.3819	1.49484	2.00601	-0.790506	-0.47121	-0.929893	-0.407731	cellular amino acid metabolic process [GO:0006520];pyridoxal phosphate biosynthetic process [GO:0042823];pyridoxine biosynthetic process [GO:0008615]	chloroplast [GO:0009507];cytosol [GO:0005829];endoplasmic reticulum [GO:0005783]	amine-lyase activity [GO:0016843];protein heterodimerization activity [GO:0046982];pyridoxal 5'-phosphate synthase (glutamine hydrolysing) activity [GO:0036381]	+	26	26	18	53.4	53.4	36.9	32.862	0	323.31	66061000000	394	744030000	715150000	492870000	535000000	828080000	1167300000	1097100000	852500000	3375300000	2602500000	3493700000	3457900000	2890900000	3402600000	3641700000	3371800000	5799000000	3805200000	4144600000
1.14468	1.69307	1.53795	1.73273	-0.705995	-1.13885	0.690028	-0.413717	-0.479259	-0.139661	-0.921593	-0.844861	-0.640846	-0.375502	-0.544779	-0.593391	flavonoid biosynthetic process [GO:0009813];regulation of jasmonic acid mediated signaling pathway [GO:2000022]	cytosol [GO:0005829]	dioxygenase activity [GO:0051213];jasmonic acid hydrolase [GO:0120091];metal ion binding [GO:0046872]	+	10	10	10	33.7	33.7	33.7	39.681	0	43.586	1556900000	27	0	5756600	49370000	13047000	83589000	0	16105000	0	331440000	260460000	319070000	367110000	0	0	97113000	0	0	7919500	0
1.47987	1.25939	1.18055	1.2066	-0.531354	-1.16183	-0.867807	1.34106	-0.130581	-1.31332	-0.16635	-0.657566	-1.34465	-0.284231	-0.22823	0.218445	defense response to fungus, incompatible interaction [GO:0009817];jasmonic acid metabolic process [GO:0009694];salicylic acid metabolic process [GO:0009696];systemic acquired resistance [GO:0009627]		hydrolase activity [GO:0016787];hydrolase activity, acting on ester bonds [GO:0016788];methyl indole-3-acetate esterase activity [GO:0080030];methyl jasmonate esterase activity [GO:0080032];methyl salicylate esterase activity [GO:0080031]	+	6	5	5	34.6	30.8	30.8	28.823	0	22.502	604220000	9	68099000	87310000	51214000	33826000	92820000	63409000	44141000	62696000	27380000	7157500	19234000	39168000	0	0	0	7762600	0	0	0
-1.82772	-0.535543	-1.46211	-1.82331	1.28547	0.853892	0.454621	1.01545	0.652024	-0.133762	-0.245934	-0.374393	0.511393	-0.0341123	0.840523	0.823506	jasmonic acid metabolic process [GO:0009694];nicotinate metabolic process [GO:1901847];salicylic acid metabolic process [GO:0009696]	cytosol [GO:0005829];vacuole [GO:0005773]	carboxylic ester hydrolase activity [GO:0052689];hydrolase activity [GO:0016787];hydrolase activity, acting on ester bonds [GO:0016788];methyl indole-3-acetate esterase activity [GO:0080030];methyl jasmonate esterase activity [GO:0080032];methyl salicylate esterase activity [GO:0080031]	+	20	20	19	70	70	70	29.667	0	323.31	82399000000	470	189020000	168440000	144400000	118330000	256320000	258320000	214280000	214320000	4269000000	4232500000	5226300000	4708800000	4406100000	4463900000	4918200000	4860300000	5372500000	3891400000	5236500000
-1.61213	-0.602172	-1.81482	-0.0462979	0.265565	0.0107812	-0.249031	-0.250356	-0.832697	0.467624	0.217827	0.102112	1.79847	1.66336	1.2114	-0.329631	jasmonic acid metabolic process [GO:0009694];salicylic acid metabolic process [GO:0009696]	vacuole [GO:0005773]	hydrolase activity [GO:0016787];hydrolase activity, acting on ester bonds [GO:0016788];methyl indole-3-acetate esterase activity [GO:0080030];methyl jasmonate esterase activity [GO:0080032];methyl salicylate esterase activity [GO:0080031]	+	16	16	15	51	51	47.1	29.823	0	88.513	11764000000	182	258940000	162220000	162890000	180120000	228790000	233460000	212430000	251660000	644400000	773870000	453720000	677390000	566200000	612120000	573020000	662250000	717400000	326010000	453980000
0.945034	1.101	1.49734	2.37369	-0.922059	-0.83406	-0.00319038	-0.577622	-0.416361	-0.0700831	-1.04768	-0.801335	-1.01454	0.140257	-0.412329	0.0419437	host response to induction by symbiont of tumor, nodule or growth in host [GO:0080034];NLS-bearing protein import into nucleus [GO:0006607];symbiont intracellular protein transport in host [GO:0030581]	cytosol [GO:0005829];host cell nucleus [GO:0042025];nuclear envelope [GO:0005635];nucleus [GO:0005634]	nuclear import signal receptor activity [GO:0061608];nuclear localization sequence binding [GO:0008139]	+	34	29	25	66.7	60.8	58.7	59.445	0	323.31	23627000000	288	1306100000	2010300000	1536700000	1684000000	2681900000	2762500000	2498600000	2321000000	627520000	508230000	740090000	613020000	258980000	294330000	320630000	314950000	358940000	215630000	305950000
0.850682	0.325722	0.123594	-0.0763571	0.417497	0.336812	0.231069	0.33238	0.762562	1.03868	0.715448	0.674755	-0.578667	-0.601252	-2.34388	-2.20905	chaperone cofactor-dependent protein refolding [GO:0051085];protein folding [GO:0006457]	chloroplast [GO:0009507];chloroplast envelope [GO:0009941];chloroplast stroma [GO:0009570];cytosol [GO:0005829];mitochondrial matrix [GO:0005759];plastid [GO:0009536]	chaperone binding [GO:0051087];metal ion binding [GO:0046872];protein domain specific binding [GO:0019904];unfolded protein binding [GO:0051082]	+	13	13	12	66.9	66.9	66.9	15.049	0	323.31	22697000000	166	21022000	28267000	38314000	14580000	57820000	120820000	151890000	159310000	1972600000	1542500000	1485900000	1377400000	1174600000	1251200000	1379000000	1267000000	1598800000	1588800000	1575100000
1.60387	1.40581	1.5096	1.55085	-0.679258	-0.941124	-1.07745	-1.43117	0.184365	-0.30818	0.0825626	0.128502	-0.38145	-0.471939	-0.576988	-0.597991		anchored component of membrane [GO:0031225];anchored component of plasma membrane [GO:0046658];plasmodesma [GO:0009506]	electron transfer activity [GO:0009055];metal ion binding [GO:0046872]	+	9	9	9	31.7	31.7	31.7	20.354	0	258.88	33228000000	151	2337800000	3916700000	3074400000	2812900000	3539200000	3103700000	3434200000	3270400000	1604400000	1297900000	1390500000	1289500000	111970000	84026000	98283000	75716000	309690000	175290000	267620000
-0.337377	-1.28249	-0.644628	-0.462427	-1.47352	-1.20382	-1.22714	-0.262867	0.882178	1.05939	1.13707	1.45394	0.235999	0.200718	0.679284	1.2457	lipid catabolic process [GO:0016042]	chloroplast stroma [GO:0009570];extracellular region [GO:0005576]	hydrolase activity, acting on ester bonds [GO:0016788]	+	8	8	8	26.5	26.5	26.5	40.476	0	13.602	1035400000	25	11690000	0	46988000	57256000	11126000	0	5717400	13888000	70365000	53391000	80242000	54119000	32534000	35852000	35247000	32243000	60440000	37706000	65485000
0.914447	0.574179	0.714047	0.850376	0.287015	0.197721	0.354177	0.319544	-1.73309	-1.46501	-1.62701	-1.74717	0.537762	0.668036	0.573859	0.581115	acetyl-CoA biosynthetic process [GO:0006085];lipid metabolic process [GO:0006629]	citrate lyase complex [GO:0009346];cytosol [GO:0005829];extracellular region [GO:0005576]	ATP binding [GO:0005524];ATP citrate synthase activity [GO:0003878]	+	37	26	26	62.5	52.6	52.6	46.945	0	323.31	49422000000	523	3728800000	3926000000	3117400000	3147900000	4286700000	4309200000	3958000000	3877800000	1447100000	1283000000	1488900000	1139000000	1022200000	1064300000	1080600000	1096200000	809430000	660490000	810160000
0.802611	0.942175	0.675454	0.733786	0.0715253	-0.0451026	-0.620207	-1.21364	0.724758	0.795679	0.68491	0.626192	-1.77786	-1.775	-1.33299	0.707708			alcohol dehydrogenase (NAD+) activity [GO:0004022];oxidoreductase activity [GO:0016491];oxidoreductase activity, acting on the CH-OH group of donors, NAD or NADP as acceptor [GO:0016616]	+	5	5	5	16	16	16	35.773	0	4.7664	510090000	20	0	0	0	0	0	0	0	0	67176000	77491000	90595000	40777000	6254200	3046400	0	0	69364000	37589000	56173000
-0.2789	0.381548	-1.22641	-1.74207	0.611569	-0.0740547	-0.0243092	0.237295	1.22628	1.27865	0.623283	1.26902	-2.01435	0.252504	-0.711203	0.191148	RNA processing [GO:0006396]	nucleus [GO:0005634];ribonucleoprotein complex [GO:1990904]	mRNA binding [GO:0003729]	+	14	14	14	32.3	32.3	32.3	60.588	0	31.021	4260600000	59	198540000	360330000	282760000	296370000	362290000	413970000	416670000	441840000	52192000	97581000	86266000	70732000	49372000	73796000	69009000	75158000	75934000	88800000	137400000
-0.691078	-1.6308	-0.107234	-0.961247	-0.156995	0.632776	0.500142	-0.0823456	1.6335	0.720643	0.718584	1.07003	0.224884	-1.80272	-1.05724	0.989104	inositol trisphosphate metabolic process [GO:0032957];myo-inositol hexakisphosphate biosynthetic process [GO:0010264]	cytosol [GO:0005829]	ATP binding [GO:0005524];inositol tetrakisphosphate 1-kinase activity [GO:0047325];inositol-1,3,4-trisphosphate 5-kinase activity [GO:0052726];inositol-1,3,4-trisphosphate 6-kinase activity [GO:0052725];magnesium ion binding [GO:0000287]	+	14	14	14	34.8	34.8	34.8	54.18	0	53.717	2922000000	53	190970000	289940000	176170000	200100000	232660000	353330000	286490000	342070000	57819000	32830000	28995000	43858000	51636000	50280000	34386000	25623000	109340000	62151000	62667000
1.36133	2.058	1.19565	1.3775	-0.890841	-0.424984	-0.855221	-0.436599	-1.43519	-0.459874	-0.862444	-0.645185	0.0974665	-0.37922	-0.021318	0.320931	diaminopimelate biosynthetic process [GO:0019877];lysine biosynthetic process via diaminopimelate [GO:0009089]	chloroplast [GO:0009507];chloroplast stroma [GO:0009570];cytosol [GO:0005829]	4-hydroxy-tetrahydrodipicolinate reductase [GO:0008839];NADPH binding [GO:0070402]	+	19	19	13	64	64	49	37.55	0	258.41	25912000000	222	389810000	359680000	326530000	312840000	553540000	538010000	452780000	397830000	1908900000	1693600000	2093300000	1851400000	885940000	1170000000	994270000	1149400000	1182800000	846590000	1390900000
-0.0222839	0.656056	-0.256967	-0.394648	-0.392028	-0.129683	-1.05657	-0.13143	1.11378	1.35019	0.812204	1.47004	-0.097122	-0.483188	0.184983	-2.62333	riboflavin biosynthetic process [GO:0009231]	chloroplast [GO:0009507];chloroplast stroma [GO:0009570];riboflavin synthase complex [GO:0009349]	6,7-dimethyl-8-ribityllumazine synthase activity [GO:0000906]	+	7	7	7	26.9	26.9	26.9	24.024	0	36.357	4081800000	87	240300000	315690000	162730000	188440000	272540000	277240000	372550000	343170000	157790000	153350000	151810000	99735000	50391000	62843000	68915000	91200000	173240000	91114000	205850000
0.0568781	-0.219107	0.167396	-0.0717737	0.455969	-0.187327	-0.314884	0.861809	-0.761517	-2.5722	-0.923554	-0.87769	1.04826	0.751474	1.25225	1.33402	methionine biosynthetic process [GO:0009086];one-carbon metabolic process [GO:0006730];tetrahydrofolate interconversion [GO:0035999]	cytosol [GO:0005829]	FAD binding [GO:0071949];methylenetetrahydrofolate reductase (NAD(P)H) activity [GO:0004489]	+	59	51	51	87	84.5	84.5	66.801	0	323.31	126060000000	1024	9375000000	9815200000	7499800000	7051900000	7603300000	7580000000	6913100000	7702000000	4460600000	3824600000	4194100000	4154800000	2995400000	3056000000	3375900000	3757100000	3942800000	2388600000	4011100000
1.41638	1.44324	1.32889	1.31243	-1.28505	-0.537813	0.350085	-0.0285428	0.414918	-0.630842	-1.22904	-0.0752523	0.44524	-1.35884	-0.754283	-0.811529	carbohydrate metabolic process [GO:0005975];lignin biosynthetic process [GO:0009809]		beta-glucosidase activity [GO:0008422];coniferin beta-glucosidase activity [GO:0047782];scopolin beta-glucosidase activity [GO:0102483]	+	39	39	39	64.5	64.5	64.5	59.112	0	323.31	17436000000	167	81272000	84606000	44671000	73624000	208530000	289480000	181510000	204520000	4092700000	3812100000	4244600000	3720700000	0	39381000	24430000	72504000	36445000	68034000	9255500
-1.50584	0.333207	-0.777002	-0.363106	0.329688	0.636924	0.387022	2.89084	-0.576444	0.290577	0.300032	-0.0203423	-1.16721	-0.839708	-0.337963	0.419326	regulation of transcription, DNA-templated [GO:0006355]		DNA-binding transcription factor activity [GO:0003700]	+	2	2	2	10.9	10.9	10.9	30.184	1	-2	223430000	1	0	0	0	0	0	0	0	0	7904300	16483000	11675000	12850000	12734000	16831000	15581000	19665000	11640000	12310000	17446000
-0.485749	-1.23452	-0.444556	-2.06127	0.84737	1.62082	1.23201	1.0308	-0.469775	-0.539315	-0.538954	-0.7919	0.668205	0.884304	0.433271	-0.150747	defense response to bacterium [GO:0042742];plant-type hypersensitive response [GO:0009626]		oxidoreductase activity [GO:0016491]	+	18	18	12	60.7	60.7	48.6	26.9	0	82.607	15653000000	171	1092300000	806750000	608260000	350400000	2553300000	2925000000	1747500000	2495700000	154610000	111360000	182550000	136850000	178720000	313560000	285360000	194770000	136450000	109320000	139620000
-1.05381	-0.930285	-1.44096	-1.00883	0.913588	0.634779	0.421544	0.806867	-1.02769	-0.801622	-0.657361	-0.503036	0.995284	1.08993	1.18022	1.38139	cell wall organization [GO:0071555]	extracellular region [GO:0005576];plant-type cell wall [GO:0009505]	carboxylic ester hydrolase activity [GO:0052689];pectin acetylesterase activity [GO:0052793]	+	22	22	22	61.5	61.5	61.5	45.944	0	285.02	12753000000	257	327370000	283100000	164290000	194030000	362070000	371110000	349060000	358840000	462510000	520650000	461550000	377350000	658550000	684120000	615950000	737550000	511110000	343500000	483560000
0.915728	0.138911	-1.28175	0.942406	0.354335	0.776262	0.615956	1.29464	-1.58386	-1.84815	-1.13462	-0.145203	0.568709	0.741727	0.396094	-0.751188		cytosol [GO:0005829]		+	16	16	16	25.8	25.8	25.8	71.421	0	39.305	2638900000	81	299110000	324270000	192000000	229130000	371430000	336750000	345100000	293050000	13252000	13273000	6536200	16019000	14685000	15197000	16012000	44734000	7859000	4943100	22687000
0.599295	0.496478	0.550108	0.713681	-1.02388	-2.46297	-1.80519	0.496967	0.622118	0.566486	0.498465	-0.904682	-0.199108	0.599067	0.584149	0.669009	dephosphorylation [GO:0016311]	cytoplasm [GO:0005737];cytosol [GO:0005829]	transferase activity, transferring glycosyl groups [GO:0016757]	+	21	17	17	32.5	26.8	26.8	97.323	0	86.786	2471900000	45	154700000	174940000	160690000	95411000	482460000	464660000	342370000	478810000	9221500	15201000	8572600	12294000	0	0	1929800	5923700	9523100	5852600	6847900
-0.26822	0.411679	0.448656	1.0889	-0.241968	-0.115145	-0.0542912	0.0336629	-1.61159	-1.71788	-1.191	-1.17087	0.88669	0.931157	1.31413	1.25608	cell redox homeostasis [GO:0045454];pollen tube growth [GO:0009860];pollen tube guidance [GO:0010183];regulation of pollen tube growth [GO:0080092];response to cadmium ion [GO:0046686]	cytosol [GO:0005829];nucleus [GO:0005634]	protein-disulfide reductase activity [GO:0047134]	+	56	56	56	72	72	72	65.169	0	323.31	58835000000	746	4456100000	4107200000	3794400000	3651600000	4768400000	4825000000	4518500000	4686600000	1570600000	1532600000	1869200000	1770800000	984820000	1265300000	1497100000	1323500000	1174300000	902240000	1255400000
-0.132238	-0.382323	-0.00198127	-0.330118	0.533315	0.289131	0.421345	0.657023	-1.13593	-2.09276	-1.19751	-1.18399	1.15613	0.962679	1.29244	1.14478	double fertilization forming a zygote and endosperm [GO:0009567]	cytoplasm [GO:0005737];nucleus [GO:0005634]	transferase activity, transferring acyl groups other than amino-acyl groups [GO:0016747]	+	12	12	12	26.7	26.7	26.7	50.505	0	12.226	1219200000	47	23595000	0	11365000	13788000	0	28480000	14771000	18103000	44856000	33309000	57252000	24319000	58660000	69136000	80308000	90831000	13973000	3105500	8440200
-1.31656	-0.701988	-1.0373	-0.821541	0.674493	0.255964	0.334698	0.319353	-0.43734	-0.772905	-0.879069	-0.823256	1.05077	0.603467	1.40447	2.14675	GDP-mannose biosynthetic process [GO:0009298];L-ascorbic acid biosynthetic process [GO:0019853];mannose metabolic process [GO:0006013];protein N-linked glycosylation [GO:0006487];protein targeting to ER [GO:0045047]	cytosol [GO:0005829]	phosphomannomutase activity [GO:0004615]	+	32	32	32	85.4	85.4	85.4	27.761	0	323.31	72066000000	616	1989600000	2142500000	2021300000	2038400000	2784500000	2964800000	2780900000	2460000000	3150200000	2788800000	2926100000	3136800000	2531300000	2935000000	2936100000	3131800000	3148900000	2190500000	3071800000
-3.35478	-0.408912	-0.156761	-0.79302	0.0398548	0.633776	0.751927	-0.118094	0.763583	0.382229	0.352536	0.812384	0.324072	0.54626	0.105816	0.119125	SRP-dependent cotranslational protein targeting to membrane [GO:0006614]	chloroplast stroma [GO:0009570];chloroplast thylakoid membrane [GO:0009535]	GTP binding [GO:0005525];metal ion binding [GO:0046872]	+	22	22	22	54.4	54.4	54.4	39.679	0	150.93	17841000000	208	4387400	18048000	6459600	0	6391800	13242000	8365100	0	1064500000	984910000	1369400000	1029500000	890650000	1029400000	1006300000	1068200000	1261400000	870330000	1445300000
-0.828135	-0.862506	-0.654563	-0.850362	1.00893	0.770823	0.9031	0.543596	-1.13864	-1.26865	-0.881112	-1.06363	0.959417	0.809634	1.1191	1.433	defense response [GO:0006952];defense response to bacterium [GO:0042742];glutathione metabolic process [GO:0006749];response to cadmium ion [GO:0046686];response to zinc ion [GO:0010043];toxin catabolic process [GO:0009407]	apoplast [GO:0048046];chloroplast [GO:0009507];chloroplast stroma [GO:0009570];cytoplasm [GO:0005737];cytosol [GO:0005829];peroxisome [GO:0005777];plasma membrane [GO:0005886];plasmodesma [GO:0009506];thylakoid [GO:0009579];vacuole [GO:0005773]	copper ion binding [GO:0005507];glutathione binding [GO:0043295];glutathione peroxidase activity [GO:0004602];glutathione transferase activity [GO:0004364]	+	35	35	33	80	80	80	24.146	0	323.31	399280000000	964	13820000000	12714000000	5381200000	5552300000	7260200000	7403200000	7546100000	13753000000	16663000000	13513000000	19651000000	15753000000	17717000000	22750000000	23605000000	23138000000	15614000000	9881200000	16553000000
0.234743	-0.622559	1.30168	0.557621	-0.875031	-1.72767	-0.671242	-1.12632	-1.46093	-0.0969993	-0.012346	0.326958	0.836657	1.36493	0.580845	1.38966	response to zinc ion [GO:0010043]	chloroplast [GO:0009507];cytosol [GO:0005829];endoplasmic reticulum [GO:0005783]	hydrolase activity [GO:0016787];transferase activity, transferring acyl groups other than amino-acyl groups [GO:0016747]	+	18	18	18	59.4	59.4	59.4	25.921	0	72.341	9237300000	134	342900000	450930000	271600000	312640000	451810000	466660000	426150000	437750000	431330000	339700000	768950000	506710000	203770000	175610000	253240000	171430000	225300000	262350000	322860000
0.861887	0.6438	0.803703	0.681741	0.407635	1.18301	0.422459	0.395543	0.353398	-1.05194	0.259986	0.301888	-1.9032	-0.929286	-2.21568	-0.214945	spliceosomal complex assembly [GO:0000245]	catalytic step 2 spliceosome [GO:0071013];U2 snRNP [GO:0005686];U2-type prespliceosome [GO:0071004]	nucleic acid binding [GO:0003676];zinc ion binding [GO:0008270]	+	12	12	12	42.6	42.6	42.6	31.369	0	76.852	3345800000	73	257480000	278820000	182570000	178550000	358000000	318590000	258390000	221820000	79342000	71304000	58583000	105300000	78343000	116980000	68976000	99998000	99119000	49136000	96103000
0.824603	1.0518	1.2654	1.79364	-0.792673	-1.203	-0.534347	-0.606312	0.21939	-0.0132292	0.149833	-0.445953	-2.02898	-0.0948606	-0.56249	0.97717	protein transport to vacuole involved in ubiquitin-dependent protein catabolic process via the multivesicular body sorting pathway [GO:0043328]	cytoplasm [GO:0005737];early endosome [GO:0005769];early endosome membrane [GO:0031901];multivesicular body [GO:0005771];plasma membrane [GO:0005886]	ubiquitin binding [GO:0043130]	+	10	10	10	22.7	22.7	22.7	72.317	0	90.949	3882400000	90	196960000	162140000	145150000	169130000	330210000	314250000	288490000	280560000	174100000	176500000	245520000	199810000	85066000	81564000	107300000	82655000	103810000	111830000	119930000
-0.811586	-1.6479	-0.868189	0.153594	-0.572736	-0.626658	-0.208478	-0.23979	0.446116	2.06647	1.88139	1.24923	-0.661964	0.0305777	-0.0944837	-0.0955964	hydrogen peroxide catabolic process [GO:0042744];response to oxidative stress [GO:0006979]	extracellular region [GO:0005576];vacuole [GO:0005773]	heme binding [GO:0020037];metal ion binding [GO:0046872];peroxidase activity [GO:0004601]	+	15	14	10	39.5	39.5	35	38.1	0	182.51	98816000000	77	8854900000	7794900000	5292900000	7402100000	7007500000	7134700000	7750500000	8039400000	2008400000	2033000000	2130000000	2455100000	1507000000	1706900000	1910200000	2027500000	3408600000	3230000000	3812600000
-0.57877	-2.34639	-1.57726	-0.592662	0.994023	0.916537	0.069273	0.365015	-0.0950994	0.358948	0.0860731	-1.04845	0.587942	1.03225	0.798636	1.02993	defense response [GO:0006952];defense response to bacterium [GO:0042742];defense response to oomycetes [GO:0002229];response to salicylic acid [GO:0009751]	endoplasmic reticulum [GO:0005783];integral component of membrane [GO:0016021];plasma membrane [GO:0005886]	ATP binding [GO:0005524];carbohydrate binding [GO:0030246];transmembrane receptor protein serine/threonine kinase activity [GO:0004675]	+	6	5	5	9.9	8.7	8.7	75.541	0	5.134	953190000	14	2256500	0	0	0	0	0	4366300	0	36334000	0	0	14167000	68549000	110260000	50588000	67197000	33119000	31150000	59622000
-0.326326	-0.483501	-0.734673	-0.862317	-0.826378	-0.445477	-0.48412	-0.581123	1.8141	1.58496	1.71668	1.5028	-0.585285	-0.323055	-0.463619	-0.502661	oxidation-reduction process [GO:0055114];response to cadmium ion [GO:0046686];response to cold [GO:0009409];response to salt stress [GO:0009651];response to toxic substance [GO:0009636];response to water deprivation [GO:0009414]	cytosol [GO:0005829];endoplasmic reticulum [GO:0005783]	alcohol dehydrogenase (NADP+) activity [GO:0008106];alditol:NADP+ 1-oxidoreductase activity [GO:0004032];aldo-keto reductase (NADP) activity [GO:0004033];NADP+ binding [GO:0070401];oxidoreductase activity [GO:0016491];steroid dehydrogenase activity [GO:0016229]	+	28	28	23	64.6	64.6	54.7	34.684	0	148.96	21806000000	332	1396900000	1526000000	1122300000	1133800000	805750000	947910000	792260000	866370000	752570000	653720000	627960000	538690000	416860000	514940000	511150000	521880000	1805600000	1061400000	1578000000
-1.16284	-1.39958	-1.59962	-2.27391	0.838603	0.627889	0.306582	0.435999	0.491757	0.41591	0.517618	0.509318	0.853562	0.154398	0.813422	0.470895	glycine decarboxylation via glycine cleavage system [GO:0019464]	apoplast [GO:0048046];chloroplast [GO:0009507];chloroplast envelope [GO:0009941];cytosol [GO:0005829];glycine cleavage complex [GO:0005960];mitochondrion [GO:0005739];vacuole [GO:0005773]	ATP binding [GO:0005524];glycine binding [GO:0016594];glycine dehydrogenase (decarboxylating) activity [GO:0004375];pyridoxal phosphate binding [GO:0030170]	+	91	52	52	67.2	45.3	45.3	113.77	0	323.31	224090000000	1273	4691400000	4563400000	3462400000	3218200000	4824400000	4338500000	4640400000	4379100000	10047000000	9137100000	10156000000	9065000000	9471100000	10858000000	10931000000	11571000000	11924000000	9253600000	13532000000
0.86023	-0.494758	0.49317	0.505572	-0.990699	-2.30265	-0.42168	-0.937189	-0.871892	0.428574	1.02847	-0.732688	0.166388	1.08183	0.938868	1.24845	abscisic acid-activated signaling pathway [GO:0009738];regulation of protein serine/threonine phosphatase activity [GO:0080163]	cytoplasm [GO:0005737];nucleus [GO:0005634];plasma membrane [GO:0005886]	abscisic acid binding [GO:0010427];identical protein binding [GO:0042802];protein homodimerization activity [GO:0042803];protein phosphatase inhibitor activity [GO:0004864];signaling receptor activity [GO:0038023]	+	3	3	3	20.5	20.5	20.5	21.282	0	4.2729	136510000	9	7762000	12322000	11304000	8436800	11639000	20328000	16585000	15249000	0	0	0	0	14124000	0	0	0	0	0	0
-2.16708	-0.802463	-1.39954	-1.36143	0.205756	0.127411	0.404016	0.151856	0.287554	0.0716352	0.83007	1.188	1.45582	1.10609	0.134093	-0.231782			GTP binding [GO:0005525];metal ion binding [GO:0046872]	+	2	2	2	5	5	5	33.692	1	-2	928170000	6	6599000	0	0	4192100	0	0	0	0	18228000	33184000	28616000	26659000	7453300	58512000	56383000	83506000	61227000	58923000	81456000
0.829956	0.834247	1.68225	1.53028	-0.101066	0.335748	-0.528773	0.0608761	0.739874	-0.619838	-0.397126	0.465212	-1.61131	-1.70874	-0.946716	-0.564885	isopentenyl diphosphate biosynthetic process, methylerythritol 4-phosphate pathway [GO:0019288];terpenoid biosynthetic process [GO:0016114]	chloroplast [GO:0009507];chloroplast stroma [GO:0009570]	4-(cytidine 5'-diphospho)-2-C-methyl-D-erythritol kinase activity [GO:0050515];ATP binding [GO:0005524]	+	28	28	28	41.8	41.8	41.8	42.042	0	221.35	34986000000	378	27254000	34112000	50345000	10705000	173500000	45984000	50486000	64442000	2296100000	2230600000	3068600000	2581500000	1711100000	1498700000	1545800000	1834600000	2603400000	1561600000	2383900000
1.05306	1.38943	1.18069	-0.306107	0.367839	0.419764	0.195908	-1.3371	-0.0644465	-1.09715	-0.765732	-1.71589	1.03677	-1.36281	0.784554	0.221209	phosphatidylethanolamine biosynthetic process [GO:0006646];phospholipid biosynthetic process [GO:0008654]	plasma membrane [GO:0005886]	ATP binding [GO:0005524];ethanolamine kinase activity [GO:0004305]	+	20	20	20	47.3	47.3	47.3	42.859	0	42.362	5493500000	148	448040000	670940000	412160000	449550000	447010000	537670000	438250000	538480000	197720000	124070000	125030000	69645000	110630000	103810000	89133000	87147000	93258000	40514000	80131000
-0.860887	-1.19179	0.896851	-0.734348	-0.544109	-1.30206	0.862258	-0.954229	-0.950401	0.85834	-1.0861	0.887109	1.0481	1.03107	1.0232	1.017	L-ascorbic acid biosynthetic process [GO:0019853]	membrane [GO:0016020]	D-arabinono-1,4-lactone oxidase activity [GO:0003885];FAD binding [GO:0071949];L-gulonolactone oxidase activity [GO:0050105]	+	12	4	4	21.7	9	9	66.281	0	26.397	4467200000	16	450660000	349120000	269930000	278170000	698590000	916970000	703260000	701890000	0	0	10580000	0	0	0	7281400	0	0	5914100	0
0.545788	0.209582	0.147411	-0.135472	-1.74546	-2.00068	-0.758205	-1.48854	1.20005	0.468427	1.2031	1.03259	0.277473	0.67828	0.16097	0.2047	proteasomal protein catabolic process [GO:0010498];proteasomal ubiquitin-independent protein catabolic process [GO:0010499];proteasome-mediated ubiquitin-dependent protein catabolic process [GO:0043161];response to zinc ion [GO:0010043]	cytoplasm [GO:0005737];cytosol [GO:0005829];nucleus [GO:0005634];plastid [GO:0009536];proteasome complex [GO:0000502];proteasome core complex [GO:0005839];proteasome core complex, alpha-subunit complex [GO:0019773];vacuolar membrane [GO:0005774]	endopeptidase activity [GO:0004175];threonine-type endopeptidase activity [GO:0004298]	+	27	27	12	85	85	56.1	27.294	0	300.79	46955000000	307	4318600000	4469000000	3308800000	2837400000	4509800000	4873400000	4324500000	4507700000	1027600000	901540000	1055800000	705820000	377620000	546770000	680010000	629660000	1160200000	623380000	1042800000
-0.724555	0.372358	-1.02771	-1.45349	-1.14546	-0.973013	-1.17596	-0.491475	1.15848	1.32044	0.581313	1.00567	1.13365	0.299319	1.21094	-0.0904994	proteasomal protein catabolic process [GO:0010498];proteasomal ubiquitin-independent protein catabolic process [GO:0010499];proteasome-mediated ubiquitin-dependent protein catabolic process [GO:0043161]	cytoplasm [GO:0005737];cytosol [GO:0005829];cytosolic ribosome [GO:0022626];mitochondrion [GO:0005739];nucleus [GO:0005634];polysomal ribosome [GO:0042788];proteasome complex [GO:0000502];proteasome core complex [GO:0005839];proteasome core complex, alpha-subunit complex [GO:0019773]	endopeptidase activity [GO:0004175];structural constituent of ribosome [GO:0003735];threonine-type endopeptidase activity [GO:0004298]	+	25	10	10	87.8	56.9	56.9	27.35	0	98.474	12378000000	126	1085100000	1089900000	839590000	830060000	1020100000	1069400000	971210000	952570000	255950000	313600000	223840000	269920000	131170000	165550000	198230000	161430000	443000000	227150000	308950000
-0.0387612	0.290651	0.198889	0.193547	-1.92244	-1.3789	-1.58672	-1.44162	0.813822	0.710316	1.1004	1.05676	0.28798	0.451216	0.809829	0.455037	proteasomal protein catabolic process [GO:0010498];proteasomal ubiquitin-independent protein catabolic process [GO:0010499];proteasome-mediated ubiquitin-dependent protein catabolic process [GO:0043161];response to cadmium ion [GO:0046686]	cytoplasm [GO:0005737];cytosol [GO:0005829];cytosolic ribosome [GO:0022626];mitochondrion [GO:0005739];nucleus [GO:0005634];proteasome complex [GO:0000502];proteasome core complex [GO:0005839];proteasome core complex, alpha-subunit complex [GO:0019773];vacuole [GO:0005773]	endopeptidase activity [GO:0004175];threonine-type endopeptidase activity [GO:0004298]	+	24	24	24	67.6	67.6	67.6	27.475	0	323.31	33467000000	324	2918800000	2631100000	2665200000	2387700000	3082300000	3170400000	2875400000	3154000000	668690000	682870000	781310000	652520000	261950000	385380000	410800000	415790000	906380000	542870000	815820000
-0.387208	0.483431	0.753019	0.608337	-0.818223	-1.6759	-1.66625	-1.15239	1.01985	1.38389	1.0229	1.28968	-0.32514	0.130427	-0.541896	-0.124526	proteasomal protein catabolic process [GO:0010498];proteasomal ubiquitin-independent protein catabolic process [GO:0010499];proteasome-mediated ubiquitin-dependent protein catabolic process [GO:0043161];response to cadmium ion [GO:0046686]	cytoplasm [GO:0005737];cytosol [GO:0005829];cytosolic ribosome [GO:0022626];nucleus [GO:0005634];plasma membrane [GO:0005886];polysomal ribosome [GO:0042788];proteasome complex [GO:0000502];proteasome core complex [GO:0005839];proteasome core complex, alpha-subunit complex [GO:0019773];vacuolar membrane [GO:0005774]	endopeptidase activity [GO:0004175];ribonuclease activity [GO:0004540];structural constituent of ribosome [GO:0003735];threonine-type endopeptidase activity [GO:0004298]	+	15	15	3	64.6	64.6	15.2	25.947	0	323.31	13753000000	194	1139500000	1113300000	877650000	917780000	1146400000	1336100000	1202400000	1340100000	326520000	295020000	350850000	305620000	137260000	175880000	151810000	151570000	450510000	265090000	456700000
0.902615	1.30607	1.19775	1.1238	-0.32061	-0.202593	-0.230075	-0.465579	-1.41159	-1.49136	-1.41989	-1.32192	0.550854	0.47042	0.692023	0.620081	defense response to bacterium [GO:0042742];embryo development ending in seed dormancy [GO:0009793];response to zinc ion [GO:0010043]	cytosol [GO:0005829];mitochondrial matrix [GO:0005759];mitochondrion [GO:0005739]	copper ion binding [GO:0005507];manganese ion binding [GO:0030145];metal ion binding [GO:0046872];superoxide dismutase activity [GO:0004784]	+	22	22	22	74.9	74.9	74.9	25.444	0	323.31	44159000000	337	1879000000	1959400000	1526600000	1497200000	1861300000	1964800000	1878700000	1758400000	2105200000	2654000000	3173900000	2591400000	1113400000	1351500000	1443900000	1416500000	945940000	669920000	858520000
-1.16558	-1.40055	-1.11323	-1.12191	-0.632868	-0.105774	0.781106	0.5667	0.612994	1.49738	1.26667	1.62552	-0.736702	0.0242925	-0.510609	0.41257	protein import into chloroplast stroma [GO:0045037];protein targeting to chloroplast [GO:0045036]	chloroplast [GO:0009507];chloroplast envelope [GO:0009941];chloroplast outer membrane [GO:0009707];cytosol [GO:0005829];integral component of membrane [GO:0016021];plastid [GO:0009536];TOC-TIC supercomplex I [GO:0061927]	chaperone binding [GO:0051087];G protein-coupled receptor activity [GO:0004930];GTP binding [GO:0005525];GTPase activity [GO:0003924];metal ion binding [GO:0046872];ribosomal small subunit binding [GO:0043024];transmembrane signaling receptor activity [GO:0004888]	+	10	10	10	7.8	7.8	7.8	160.82	0	16.709	1089700000	36	13471000	10384000	0	10768000	13261000	40160000	31967000	6686200	36962000	40670000	40266000	22758000	37571000	54793000	55190000	66921000	89050000	75720000	97352000
0.914418	0.712252	0.779743	0.553634	-0.815339	0.0558414	-0.48139	-1.30492	0.82536	0.495418	0.746826	0.875761	-2.46219	-1.31716	0.179361	0.242387		vacuolar membrane [GO:0005774];vacuole [GO:0005773]		+	3	2	2	15.6	15.6	15.6	18.356	0	15.386	843840000	21	62406000	63581000	63058000	51455000	35639000	96995000	117980000	127730000	24452000	19656000	23922000	23489000	0	12072000	8741300	0	22425000	13062000	21581000
0.117383	0.476012	0.0923699	0.277219	0.0968975	0.874964	0.349148	0.531561	-1.69043	-2.13626	-1.55676	-0.834248	0.846786	0.927955	0.974756	0.652639		peroxisome [GO:0005777]	hydrolase activity [GO:0016787]	+	16	16	16	56.8	56.8	56.8	36.656	0	71.618	5820800000	118	460210000	490690000	389500000	363720000	593230000	600850000	420490000	488490000	116080000	150930000	143140000	110150000	93506000	140050000	118330000	149480000	38081000	15497000	32156000
-0.122795	0.484054	0.409967	0.527935	-0.65646	-0.00349196	-1.53254	0.358783	1.39734	0.513173	2.3677	-0.015169	-1.0922	-0.679805	-1.02492	-0.931571	photoinhibition [GO:0010205];response to abscisic acid [GO:0009737];response to cold [GO:0009409]	chloroplast [GO:0009507];chloroplast stroma [GO:0009570];chloroplast thylakoid [GO:0009534];chloroplast thylakoid membrane [GO:0009535];cytosol [GO:0005829];nucleus [GO:0005634];plastoglobule [GO:0010287];stromule [GO:0010319];thylakoid [GO:0009579];thylakoid lumen [GO:0031977]		+	20	20	19	65.4	65.4	60.7	34.948	0	193.81	17966000000	241	243910000	272200000	188510000	220420000	205730000	191850000	202020000	204020000	1184500000	1089800000	1150600000	1028400000	963410000	809030000	573220000	809100000	1205600000	1087100000	1161600000
1.00112	0.541382	0.733697	0.928546	1.94253	0.500676	0.00169159	0.515664	-1.15608	-0.667557	-1.48814	-1.794	0.00934753	-0.551585	0.166133	-0.683408	actin filament bundle assembly [GO:0051017];actin filament capping [GO:0051693];actin filament severing [GO:0051014];actin polymerization or depolymerization [GO:0008154]	actin cytoskeleton [GO:0015629];cytoplasm [GO:0005737];cytosol [GO:0005829]	actin filament binding [GO:0051015]	+	100	100	84	80.7	80.7	72.2	107.84	0	323.31	182370000000	1550	9583500000	10853000000	8688400000	8181300000	12948000000	13263000000	12165000000	13016000000	7067300000	6128100000	7347500000	6888500000	4378700000	4994200000	5372300000	5291600000	5214500000	3580600000	5383000000
1.63318	1.12487	1.74528	1.55043	-1.22816	-0.701033	-0.955718	-0.633002	0.0184368	-1.20823	0.21099	0.133147	-0.299611	-0.565533	-0.537612	-0.287444	actin filament bundle assembly [GO:0051017];actin filament capping [GO:0051693];actin filament severing [GO:0051014];actin polymerization or depolymerization [GO:0008154]	actin cytoskeleton [GO:0015629];actin filament [GO:0005884];cytoplasm [GO:0005737];cytosol [GO:0005829]	actin filament binding [GO:0051015]	+	84	66	66	69.2	60.4	60.4	106.35	0	323.31	89045000000	1042	3292900000	3480900000	2717700000	2750900000	4452800000	4239900000	3877500000	4052500000	4478100000	4437700000	5025000000	4352400000	2147800000	2953800000	2937100000	3347600000	4140400000	2316300000	4029000000
0.128208	1.49304	2.13493	1.40021	0.317033	-0.548644	-0.928173	-1.06484	0.296377	-1.16478	-0.970927	-1.10944	-0.0990647	-0.272336	0.018933	0.369475	response to abscisic acid [GO:0009737]	plasma membrane [GO:0005886];vacuole [GO:0005773]	magnesium-dependent protein serine/threonine phosphatase activity [GO:0004724];metal ion binding [GO:0046872];protein serine/threonine phosphatase activity [GO:0004722]	+	24	24	21	64.2	64.2	57.7	39.354	0	108.31	8167600000	136	780500000	674260000	598280000	684160000	843690000	955960000	1014200000	895820000	143540000	156200000	186430000	189540000	108170000	71163000	65305000	55350000	109830000	56518000	92867000
-0.824987	-1.88565	-0.999544	-1.68747	0.646903	0.725434	0.816294	0.723885	-1.15567	0.340906	-0.553157	0.682226	0.618062	0.90425	0.811579	0.836937	carbohydrate metabolic process [GO:0005975]	cell wall [GO:0005618]	lyase activity [GO:0016829];polygalacturonase activity [GO:0004650]	+	3	3	3	9.5	9.5	9.5	54.69	0	88.977	652530000	11	30152000	22074000	36183000	42980000	23636000	80144000	45805000	99920000	0	0	0	0	13579000	18454000	23157000	19269000	0	24052000	0
-0.149845	-1.51161	0.853857	-0.462576	-0.584837	-1.98703	-1.39458	-0.298019	1.6881	0.575899	1.04843	0.523781	0.607754	0.151002	0.605892	0.333782	methylation [GO:0032259];peptidyl-diphthamide biosynthetic process from peptidyl-histidine [GO:0017183]		diphthine synthase activity [GO:0004164]	+	8	8	8	30.7	30.7	30.7	30.79	0	75.479	2802000000	92	110450000	170520000	123620000	107370000	213030000	257940000	183880000	170810000	102770000	34852000	89124000	95344000	79060000	91269000	41047000	77433000	159630000	73250000	101840000
1.51542	1.30624	1.11737	1.14344	-0.422621	0.214349	-1.45377	0.200562	-0.239853	0.322053	0.485589	-0.320003	-0.40088	-1.00393	-0.407547	-2.05643	auxin homeostasis [GO:0010252];camalexin biosynthetic process [GO:0010120];positive regulation of camalexin biosynthetic process [GO:1901183];response to auxin [GO:0009733]	cytoplasm [GO:0005737]	acid-amino acid ligase activity [GO:0016881];indole-3-acetic acid amido synthetase activity [GO:0010279]	+	24	23	13	40	40	22.7	69.283	0	88.532	3195700000	56	40975000	48360000	52582000	37962000	93823000	89397000	71604000	78258000	705550000	576140000	532610000	541770000	8016500	11214000	40401000	11244000	46954000	13485000	31973000
1.30216	0.828504	0.0853985	2.561	0.0115363	-1.47504	0.377378	0.128668	-1.13082	-1.03275	-0.559244	-0.929125	0.206752	-0.207951	-0.302249	0.135789	aspartate family amino acid biosynthetic process [GO:0009067];homoserine biosynthetic process [GO:0009090];lysine biosynthetic process via diaminopimelate [GO:0009089];methionine biosynthetic process [GO:0009086];threonine biosynthetic process [GO:0009088]	chloroplast [GO:0009507];chloroplast stroma [GO:0009570]	aspartate kinase activity [GO:0004072];ATP binding [GO:0005524];homoserine dehydrogenase activity [GO:0004412];NADP binding [GO:0050661]	+	51	41	41	54	43.9	43.9	100.25	0	150.42	15502000000	267	1435700000	972420000	787230000	895840000	1703500000	1517100000	1227500000	1317400000	416300000	403910000	402660000	482280000	237150000	207300000	335440000	533550000	351760000	263470000	327640000
-0.766005	-0.465071	0.25308	-0.128628	-0.28717	-0.679141	-1.01134	-0.608792	1.31914	1.64794	1.40337	1.94235	-0.218717	-0.714514	-0.825258	-0.861253	chitin catabolic process [GO:0006032];polysaccharide catabolic process [GO:0000272];response to abscisic acid [GO:0009737];response to jasmonic acid [GO:0009753];response to salt stress [GO:0009651]	cell wall [GO:0005618];extracellular region [GO:0005576];secretory vesicle [GO:0099503]	chitin binding [GO:0008061];chitinase activity [GO:0004568];endochitinase activity [GO:0008843];exochitinase activity [GO:0035885]	+	21	21	21	55.1	55.1	55.1	41.128	0	323.31	35606000000	251	5575800000	6260200000	4935200000	4546600000	1944300000	1979600000	1803500000	1859800000	284060000	310810000	398720000	375320000	253380000	302650000	317500000	299410000	565220000	379960000	586210000
-0.277442	0.320229	0.408862	1.75047	-0.488237	-0.842107	0.436024	-0.546139	-1.54567	-1.23882	-0.627782	-0.645995	-0.0767612	2.11411	0.355894	0.903355		chloroplast thylakoid lumen [GO:0009543]	peptidyl-prolyl cis-trans isomerase activity [GO:0003755]	+	4	4	4	21	21	21	24.713	0	22.769	2265700000	38	0	0	0	0	5352700	0	0	0	154160000	152040000	193130000	215280000	91418000	113240000	108240000	122300000	98533000	91703000	134270000
0.823927	1.512	1.20296	1.15872	-0.191759	1.43588	0.55136	0.20879	-0.990785	-0.509995	-0.199122	-0.479232	-1.07202	-0.932092	-1.03762	-1.48102	response to insect [GO:0009625]		carbohydrate binding [GO:0030246];proteoglycan binding [GO:0043394]	+	5	5	5	24	24	24	28.101	0	47.59	680960000	34	24598000	24793000	8133300	16171000	24493000	9205400	24511000	10227000	65900000	43210000	85997000	80888000	7416800	57122000	11253000	29210000	7861500	17461000	10274000
-0.46017	-0.12797	-0.935434	-2.25118	0.622861	1.78385	-0.762611	0.141901	0.925605	-0.943572	0.310873	-0.777855	0.893972	0.440301	1.10182	0.0376052	galactose metabolic process [GO:0006012];L-ascorbic acid biosynthetic process [GO:0019853]	cytosol [GO:0005829]	L-galactose dehydrogenase activity [GO:0010349];oxidoreductase activity [GO:0016491]	+	14	14	14	45.1	45.1	45.1	34.531	0	119.72	11268000000	194	45666000	53199000	24195000	18149000	41196000	72993000	59226000	44323000	702190000	786100000	755960000	551390000	659190000	848410000	571150000	653810000	695350000	516410000	634300000
1.18039	1.27113	-0.293955	1.51661	1.38631	1.14863	-0.176841	-0.158756	-1.01275	0.259606	-0.299384	-0.654629	-1.49157	-0.72356	-1.12304	-0.828197		extracellular space [GO:0005615]		+	4	3	3	17.8	13.5	13.5	18.491	0	3.6762	404440000	5	123270000	62903000	51990000	56489000	15653000	0	54130000	16929000	4828400	5135500	0	8286300	4826600	0	0	0	0	0	0
-2.64723	-1.65339	0.277243	-0.365193	0.636548	0.896772	0.797647	0.723354	0.422635	-1.276	0.32522	0.423708	0.136055	0.4787	0.402404	0.421525	protein phosphorylation [GO:0006468];recognition of pollen [GO:0048544]	integral component of membrane [GO:0016021];plasma membrane [GO:0005886];plasmodesma [GO:0009506];vacuole [GO:0005773]	ATP binding [GO:0005524];carbohydrate binding [GO:0030246];protein serine/threonine kinase activity [GO:0004674];transmembrane receptor protein serine/threonine kinase activity [GO:0004675];ubiquitin protein ligase binding [GO:0031625]	+	5	2	2	6	3.2	3.2	96.465	0	10.476	268040000	12	0	0	0	0	0	0	0	0	0	0	20655000	14275000	7524200	92606000	10799000	10028000	8150300	0	21543000
1.86779	2.09258	0.891638	1.43679	-0.981876	-0.459374	-1.05065	-0.746802	-0.254922	-0.449873	-0.146759	-0.241056	-0.479051	-0.619096	-0.661389	-0.197942	cellular copper ion homeostasis [GO:0006878];copper ion transport [GO:0006825];response to cadmium ion [GO:0046686]	chloroplast [GO:0009507];cytosol [GO:0005829]	copper chaperone activity [GO:0016531];protein domain specific binding [GO:0019904]	+	28	28	2	99.2	99.2	17.4	12.971	0	323.31	48826000000	376	3272400000	3366300000	2925900000	2928500000	5152600000	6031200000	6359100000	6112700000	1146200000	1149200000	1061000000	1095000000	399140000	605880000	563110000	681850000	732050000	446890000	778850000
[truncated: 2,475 more rows]
[truncated: 121 more columns]
