# Supplementary material for: Proteome Dynamics of Persulfidation in Leaf Tissue under Light/Dark Conditions and Carbon Deprivation
Source: Antioxidants (Basel). 2023 Mar 23;12(4):789. doi: 10.3390/antiox12040789 (PMC10135009; doi:10.3390/antiox12040789)
Supplement: Supplementary file 1 [file antioxidants-12-00789-s001.zip › Dataset S6.xlsx]

## Sheet: Hoja1
Dataset 6. Differential persulfidated proteins in S2 versus S4 samples
Significant	#NAME?	Difference log2 fold change (S2/S4)	Protein IDs	Majority protein IDs	id	Gene name	Protein name	Gene ontology (biological process)	Gene ontology (cellular component)	Gene ontology (molecular function)	ANOVA Significant	Peptides	Razor + unique peptides	Unique peptides	Sequence coverage [%]	Unique + razor sequence coverage [%]	Unique sequence coverage [%]	Mol. weight [kDa]	Q-value	Score	Intensity	MS/MS count	Intensity MN1	Intensity MN2	Intensity MN3	Intensity MN4	Intensity PN1	Intensity PN2	Intensity PN3	Intensity PN4	Intensity S11	Intensity S12	Intensity S13	Intensity S14	Intensity S21	Intensity S22	Intensity S23	Intensity S24	Intensity S31	Intensity S32	Intensity S33	Intensity S34	Intensity S41	Intensity S42	Intensity S43	Intensity S44	Sequence coverage MN1 [%]	Sequence coverage MN2 [%]	Sequence coverage MN3 [%]
+	5.28105	2.4765	O03042;REV__Q9FRK9	O03042	1072	rbcL	Ribulose bisphosphate carboxylase large chain	photorespiration [GO:0009853];reductive pentose-phosphate cycle [GO:0019253];response to abscisic acid [GO:0009737];response to cadmium ion [GO:0046686]	apoplast [GO:0048046];cell wall [GO:0005618];chloroplast [GO:0009507];chloroplast envelope [GO:0009941];chloroplast stroma [GO:0009570];chloroplast thylakoid membrane [GO:0009535];cytosolic ribosome [GO:0022626];plastid [GO:0009536];plastoglobule [GO:0010287];thylakoid [GO:0009579]	magnesium ion binding [GO:0000287];monooxygenase activity [GO:0004497];ribulose-bisphosphate carboxylase activity [GO:0016984]	+	97	97	91	77.7	77.7	77.7	52.954	0	323.31	5541200000000	9549	738470000	914350000	583500000	893040000	2377100000	2193500000	1580300000	1417600000	363020000000	338070000000	414370000000	369190000000	295780000000	332350000000	339840000000	360830000000	384160000000	262940000000	376980000000	357200000000	356240000000	314290000000	337730000000	327510000000	60.5	62.4	62.6
+	4.06654	2.43458	P56757	P56757	1914	atpA	ATP synthase subunit alpha, chloroplastic	ATP synthesis coupled proton transport [GO:0015986];defense response to bacterium [GO:0042742];response to cold [GO:0009409]	chloroplast [GO:0009507];chloroplast thylakoid [GO:0009534];chloroplast thylakoid membrane [GO:0009535];cytosol [GO:0005829];mitochondrion [GO:0005739];plastid [GO:0009536];plastoglobule [GO:0010287];proton-transporting ATP synthase complex, catalytic core F(1) [GO:0045261];stromule [GO:0010319];thylakoid [GO:0009579];thylakoid lumen [GO:0031977]	ATP binding [GO:0005524];proton-transporting ATP synthase activity, rotational mechanism [GO:0046933];zinc ion binding [GO:0008270]	+	32	31	31	54.8	53.5	53.5	55.328	0	323.31	178940000000	539	78952000	92375000	126570000	87818000	179810000	376210000	236320000	307770000	11769000000	10427000000	11084000000	8798500000	11151000000	13247000000	12951000000	12702000000	11744000000	10587000000	11733000000	11985000000	11273000000	10059000000	9232900000	8715400000	15.6	20.1	12.2
+	2.26774	2.3057	F4JJY7	F4JJY7	875	At4g34090	Cyclin delta-3		chloroplast [GO:0009507];chloroplast stroma [GO:0009570]		+	11	11	11	33.3	33.3	33.3	43.963	0	24.381	3521800000	51	16302000	38724000	28728000	12701000	28667000	4501200	27618000	45470000	332350000	224980000	212370000	222090000	155430000	331160000	220320000	228330000	208720000	149290000	286430000	193960000	115350000	188960000	140220000	109090000	6.9	8.2	4.4
+	3.68727	2.28722	Q38890	Q38890	2146	KOR	Endoglucanase 25	cell wall organization [GO:0071555];cellulose biosynthetic process [GO:0030244];cellulose catabolic process [GO:0030245];cortical microtubule organization [GO:0043622];hyperosmotic salinity response [GO:0042538];response to cytokinin [GO:0009735];shoot system development [GO:0048367];unidimensional cell growth [GO:0009826]	cell plate [GO:0009504];early endosome [GO:0005769];endosome [GO:0005768];Golgi apparatus [GO:0005794];integral component of membrane [GO:0016021];plasma membrane [GO:0005886];trans-Golgi network [GO:0005802]	cellulase activity [GO:0008810]	+	3	3	3	5.3	5.3	5.3	69.191	0	7.0802	855190000	12	18441000	37717000	17191000	29419000	45316000	80320000	46284000	40993000	40245000	29025000	25511000	26821000	36530000	42658000	56842000	45116000	31223000	23518000	28008000	34617000	31842000	25295000	32143000	30110000	1.4	3.1	1.4
+	5.24431	2.28224	Q93Z10	Q93Z10	3330	At5g11580	AT5g11580/F15N18_170		cytosol [GO:0005829];plasma membrane [GO:0005886]		+	8	8	8	19.3	19.3	19.3	60.542	0	27.971	2130200000	49	61014000	44629000	18347000	42316000	101620000	69963000	100150000	42243000	73306000	118380000	127870000	114450000	65705000	103310000	99141000	87711000	166670000	92911000	161280000	149400000	75751000	70791000	80776000	62462000	6.3	4.2	2
+	3.37035	2.24939	Q9SR59	Q9SR59	5542	MDAR3	Monodehydroascorbate reductase 3	regulation of interspecies interactions between organisms [GO:0043903];response to jasmonic acid [GO:0009753];response to symbiotic fungus [GO:0009610];response to water deprivation [GO:0009414]	cytosol [GO:0005829]	flavin adenine dinucleotide binding [GO:0050660];monodehydroascorbate reductase (NADH) activity [GO:0016656]	+	45	43	43	78.2	78.2	78.2	48.362	0	323.31	21841000000	294	1591800000	2100300000	2066800000	1604000000	2715500000	2823800000	2515500000	2956900000	295750000	247980000	333080000	270900000	204590000	226620000	199390000	210010000	188740000	241300000	188650000	241950000	165750000	148590000	146410000	157250000	68	68	68.9
+	3.95781	2.24075	Q93ZT6	Q93ZT6	3373	EIF(ISO)4G1	Eukaryotic translation initiation factor isoform 4G-1		cytoplasm [GO:0005737];cytosol [GO:0005829];eukaryotic translation initiation factor 4F complex [GO:0016281];nucleus [GO:0005634];plastid [GO:0009536]	mRNA binding [GO:0003729];translation initiation factor activity [GO:0003743]	+	77	77	73	77.6	77.6	75.8	85.571	0	323.31	81930000000	967	1633000000	1593100000	1552300000	1234700000	3681700000	3924700000	4165700000	4046900000	4424800000	3995700000	5143300000	4293000000	3307100000	3515000000	3129200000	3660100000	3924500000	2794900000	4008300000	3984500000	3522600000	3191000000	3467800000	3736200000	51.2	50.3	48.3
+	5.73892	2.23744	A0A1P8BGR0	A0A1P8BGR0	329	At5g06670	Kinesin-like protein	microtubule-based movement [GO:0007018]	microtubule [GO:0005874]	ATP binding [GO:0005524];microtubule binding [GO:0008017];microtubule motor activity [GO:0003777]	+	4	4	2	5.3	5.3	2.4	82.279	0.006758	1.6032	506420000	6	14332000	48779000	65262000	6101200	59282000	58716000	50847000	76713000	0	0	0	0	28847000	17511000	24758000	25422000	11345000	0	0	18507000	0	0	0	0	2.8	3.9	5.3
+	3.97633	2.21497	Q6NMH5	Q6NMH5	2455	At3g16760	At3g16760		plasma membrane [GO:0005886]		+	11	11	11	17.1	17.1	17.1	48.828	0	11.764	4333300000	47	146730000	186510000	72568000	134910000	204090000	250700000	235280000	229130000	192800000	202970000	171020000	142190000	126800000	254490000	152450000	274890000	240080000	134300000	278030000	212150000	123550000	114160000	108850000	144640000	10.5	10.9	5.3
+	2.60962	2.20643	Q9XIC8	Q9XIC8	5855	At1g34220	F23M19.10	protein transport [GO:0015031]			+	18	18	18	30.2	30.2	30.2	68.958	0	50.281	8660700000	181	517210000	568970000	329860000	403370000	561550000	549920000	540540000	614350000	318730000	284420000	327160000	326400000	232010000	298250000	366630000	301660000	326610000	252210000	337000000	295360000	246160000	230120000	231920000	200310000	27.3	28.8	20.7
+	4.08239	2.19378	Q9SB50	Q9SB50	5221	AP4M	AP-4 complex subunit mu	Golgi to lysosome transport [GO:0090160];protein targeting [GO:0006605];vesicle-mediated transport [GO:0016192]	AP-4 adaptor complex [GO:0030124];clathrin adaptor complex [GO:0030131];clathrin-coated pit [GO:0005905];cytoplasmic vesicle [GO:0031410];cytosol [GO:0005829];intracellular membrane-bounded organelle [GO:0043231];trans-Golgi network [GO:0005802]		+	32	32	32	63.2	63.2	63.2	50.946	0	99.658	14036000000	139	1766300000	1658500000	1326900000	1366400000	2034900000	1966500000	1609500000	1726800000	42166000	28774000	50639000	4702300	55645000	44795000	38342000	56901000	34943000	29278000	41997000	69682000	11854000	20066000	29866000	20389000	57.2	53.9	51.7
+	2.40879	2.18203	Q9S7B5	Q9S7B5	5145	TS1	Threonine synthase 1, chloroplastic	threonine biosynthetic process [GO:0009088]	chloroplast [GO:0009507];chloroplast stroma [GO:0009570];cytoplasm [GO:0005737];cytosol [GO:0005829];plasma membrane [GO:0005886]	pyridoxal phosphate binding [GO:0030170];threonine synthase activity [GO:0004795]	+	49	49	46	63.9	63.9	63.9	57.776	0	323.31	157720000000	965	4126900000	4837700000	3354500000	3524100000	4668200000	5463200000	5406600000	5268700000	8103900000	6366000000	8220200000	7794600000	6730700000	7261000000	7250600000	7548500000	7761100000	5301000000	7509900000	8116000000	9177800000	8417300000	7438100000	8076200000	62.9	55.9	62.4
+	3.52875	2.16126	O82762	O82762	1600	At2g25970	F17H15.1/F17H15.1	regulation of gene expression [GO:0010468]	cytoplasm [GO:0005737];cytosol [GO:0005829];vacuole [GO:0005773]	mRNA binding [GO:0003729]	+	24	24	24	37.5	37.5	37.5	64.606	0	186.76	39649000000	360	3184400000	916960000	3346500000	742160000	6120500000	5552400000	1061300000	1138900000	1203500000	932470000	1350900000	1110300000	1787300000	1091800000	931990000	972800000	1036500000	683430000	1286200000	1112000000	913670000	1053200000	1082700000	1037400000	34.7	32.9	35.9
+	2.92582	2.16012	Q84JG2	Q84JG2	2526	SWI3B	SWI/SNF complex subunit SWI3B	chromatin remodeling [GO:0006338];multicellular organism development [GO:0007275]	nucleus [GO:0005634];SWI/SNF complex [GO:0016514]	DNA binding [GO:0003677]	+	6	6	6	14.9	14.9	14.9	52.41	0	4.912	300420000	14	42006000	24034000	21046000	14243000	55934000	39516000	41255000	48098000	0	847100	0	0	0	0	12278000	0	0	0	0	0	0	342820	420810	397170	11.5	9.4	9.4
+	2.12431	2.13378	Q94B74	Q94B74	3499	NUDT2	Nudix hydrolase 2	response to oxidative stress [GO:0006979];signal transduction [GO:0007165]	cytosol [GO:0005829]	ADP-ribose diphosphatase activity [GO:0047631];metal ion binding [GO:0046872];NAD binding [GO:0051287];NAD+ diphosphatase activity [GO:0000210];NADH pyrophosphatase activity [GO:0035529]	+	5	5	5	25.2	25.2	25.2	31.61	0	22.915	1008100000	24	36247000	43027000	20242000	38666000	42837000	34876000	51315000	43920000	43060000	45497000	52647000	44807000	47726000	48253000	42674000	44929000	57110000	40113000	46505000	28701000	43081000	30347000	65555000	15943000	8.6	11.9	5.4
+	2.56067	2.12182	Q9C744	Q9C744	3725	DELTA-ADR	AP-3 complex subunit delta	endosome organization [GO:0007032];Golgi to vacuole transport [GO:0006896];intracellular protein transport [GO:0006886];lytic vacuole organization [GO:0080171];protein storage vacuole organization [GO:1990019];protein targeting to vacuole [GO:0006623];vesicle targeting [GO:0006903]	AP-3 adaptor complex [GO:0030123];endosome membrane [GO:0010008];Golgi apparatus [GO:0005794];Golgi membrane [GO:0000139];nucleus [GO:0005634]		+	11	11	11	12.8	12.8	12.8	97.153	0	10.58	4432100000	36	35614000	74703000	131870000	38024000	108440000	91905000	89906000	99634000	211030000	222290000	232740000	177070000	276920000	234870000	241610000	248970000	230740000	207750000	228420000	225060000	207910000	377110000	217040000	222420000	4.8	4.6	4.8
+	2.64643	2.09511	P10796	P10796	1629	RBCS-1B	Ribulose bisphosphate carboxylase small chain 1B, chloroplastic	photorespiration [GO:0009853];reductive pentose-phosphate cycle [GO:0019253];response to blue light [GO:0009637];response to far red light [GO:0010218];response to red light [GO:0010114]	apoplast [GO:0048046];chloroplast [GO:0009507];chloroplast envelope [GO:0009941];chloroplast membrane [GO:0031969];chloroplast stroma [GO:0009570];plastid [GO:0009536];thylakoid [GO:0009579]	monooxygenase activity [GO:0004497];protein domain specific binding [GO:0019904];ribulose-bisphosphate carboxylase activity [GO:0016984]	+	32	32	12	68.5	68.5	51.9	20.286	0	323.31	1873400000000	1901	49294000	56357000	71669000	72401000	135860000	117330000	84653000	95887000	117570000000	116920000000	131150000000	120420000000	107250000000	109480000000	119480000000	117360000000	113060000000	101410000000	116330000000	116670000000	120580000000	120990000000	117410000000	126690000000	35.9	33.1	44.2
+	3.68526	2.08866	A0A2P2CLF9	A0A2P2CLF9	350	atp1	ATP synthase subunit alpha	ATP synthesis coupled proton transport [GO:0015986]	mitochondrion [GO:0005739];proton-transporting ATP synthase complex, catalytic core F(1) [GO:0045261]	ATP binding [GO:0005524];proton-transporting ATP synthase activity, rotational mechanism [GO:0046933]	+	45	45	44	65.9	65.9	64.5	55.103	0	323.31	138220000000	790	5656400000	5328700000	5433700000	4704200000	15557000000	15461000000	14551000000	14897000000	3168200000	2961800000	4040400000	3639200000	3205300000	3693200000	4253700000	3886700000	3270300000	2170800000	3543500000	4101900000	3809700000	3926000000	3487700000	3472300000	58.6	56.4	57.2
+	3.25997	2.08348	Q8VZS8	Q8VZS8	3198	PYL1	Abscisic acid receptor PYL1	abscisic acid-activated signaling pathway [GO:0009738];defense response [GO:0006952];regulation of protein serine/threonine phosphatase activity [GO:0080163]	cytoplasm [GO:0005737];nucleus [GO:0005634];plasma membrane [GO:0005886];plastid [GO:0009536]	abscisic acid binding [GO:0010427];identical protein binding [GO:0042802];protein homodimerization activity [GO:0042803];protein phosphatase inhibitor activity [GO:0004864];signaling receptor activity [GO:0038023]	+	18	17	17	81	81	81	25.361	0	177.63	28713000000	233	1658000000	1792500000	1183200000	936540000	1580300000	1758200000	1392900000	1864500000	1054700000	935030000	988220000	1016800000	1021200000	1111800000	332820000	1085800000	1053500000	1064100000	1000100000	1117500000	1668700000	255180000	1648500000	1192500000	74.7	75.6	70.6
+	4.25848	2.05063	F4KA76	F4KA76	1031	RBCS3B	Ribulose bisphosphate carboxylase small chain	carbon fixation [GO:0015977];photorespiration [GO:0009853];photosynthesis [GO:0015979]	chloroplast [GO:0009507]	monooxygenase activity [GO:0004497];ribulose-bisphosphate carboxylase activity [GO:0016984]	+	26	8	8	67.2	45.4	45.4	19.395	0	323.31	247850000000	378	6679000	0	15924000	8766300	55468000	23816000	15543000	6010500	14783000000	13982000000	21570000000	19898000000	16022000000	16057000000	15954000000	16346000000	14108000000	15436000000	13691000000	14039000000	13747000000	12836000000	13424000000	15829000000	29.9	17.2	39.7
+	1.73076	2.04317	Q8L7A9	Q8L7A9	2798	At1g31730	AP-4 complex subunit epsilon	intracellular protein transport [GO:0006886];receptor-mediated endocytosis [GO:0006898]	AP-4 adaptor complex [GO:0030124];clathrin-coated pit [GO:0005905];cytosol [GO:0005829];Golgi apparatus [GO:0005794];plasmodesma [GO:0009506]	cargo adaptor activity [GO:0140312]	+	58	58	58	54.9	54.9	54.9	103.73	0	323.31	24890000000	301	2477700000	2993000000	2364900000	2138400000	3400200000	3349100000	3103700000	3115100000	78157000	89722000	31248000	86287000	719610000	79984000	78767000	78964000	89017000	42528000	86515000	101640000	75303000	85979000	80209000	143410000	52.3	51.5	48.3
+	2.29986	2.03843	O49429	O49429	1321	MORF1	Multiple organellar RNA editing factor 1, mitochondrial	chloroplast RNA modification [GO:1900865];cytidine to uridine editing [GO:0016554];mitochondrial mRNA modification [GO:0080156];mitochondrial RNA modification [GO:1900864];mRNA processing [GO:0006397]	chloroplast [GO:0009507];mitochondrion [GO:0005739]	protein dimerization activity [GO:0046983]	+	2	2	2	7.6	7.6	7.6	45.157	0	24.541	583110000	15	40820000	13765000	31103000	31889000	79175000	78797000	78145000	67677000	10261000	8441000	9226300	6862600	9838800	11118000	10151000	8677000	21439000	10673000	11572000	20583000	7267900	8245000	0	7385800	7.6	4.5	7.6
+	3.90277	2.03278	F4J6A1	F4J6A1	792	EIF3G1	Eukaryotic translation initiation factor 3 subunit G	formation of cytoplasmic translation initiation complex [GO:0001732]	cytosol [GO:0005829];eukaryotic 43S preinitiation complex [GO:0016282];eukaryotic 48S preinitiation complex [GO:0033290];eukaryotic translation initiation factor 3 complex [GO:0005852];plasma membrane [GO:0005886]	mRNA binding [GO:0003729];translation initiation factor activity [GO:0003743]	+	23	23	23	60.1	60.1	60.1	35.663	0	198.61	18417000000	185	1217900000	1489500000	1052700000	1134000000	2030400000	2597600000	2318200000	2100100000	386810000	395290000	436350000	276190000	221990000	256090000	230390000	369090000	404880000	267910000	271290000	311050000	224120000	159580000	156000000	109520000	57.3	48.6	47
+	2.07546	2.02853	O82790	O82790	1604	At2g45990	AT2G45990 protein	methylation [GO:0032259];SNARE complex assembly [GO:0035493]	chloroplast [GO:0009507];chloroplast stroma [GO:0009570];cytosol [GO:0005829];endosome [GO:0005768];lytic vacuole [GO:0000323]	methyltransferase activity [GO:0008168];SNARE binding [GO:0000149]	+	28	28	27	83.6	83.6	83.6	30.112	0	168.1	24874000000	320	440990000	135460000	189350000	105100000	223760000	245450000	465790000	247090000	1712200000	1431400000	1437000000	1515600000	1214000000	1536900000	1637600000	936780000	1363600000	935530000	1665400000	1627900000	1815700000	1272100000	1043200000	1676700000	51.5	39.9	42.5
+	3.64194	2.00952	A0A1P8BF32	A0A1P8BF32	315	BIP2	Heat shock protein 70 (Hsp 70) family protein			ATP binding [GO:0005524]	+	102	10	10	81.6	14.1	14.1	74.374	0	323.31	26584000000	289	1500600000	1658300000	1355100000	1288600000	2212400000	2654600000	2292100000	2447500000	635700000	672570000	660070000	522560000	640100000	868000000	785250000	857450000	719190000	466930000	786200000	841890000	793720000	646810000	709370000	569130000	80.1	80.7	74.3
+	2.68952	2.00466	Q93W28	Q93W28	3291	At4g15545	Uncharacterized protein At4g15545		cytosol [GO:0005829];endoplasmic reticulum [GO:0005783];ER body [GO:0010168]	protein self-association [GO:0043621]	+	21	21	21	65.3	65.3	65.3	37.206	0	184.64	12294000000	202	15050000	3226200	38483000	3686500	74921000	128480000	93134000	93107000	838820000	780250000	801120000	758970000	507640000	768120000	810140000	864620000	725330000	436270000	832600000	756230000	771330000	652260000	780100000	760210000	4.2	3	7.7
+	2.64813	2.00427	F4JJL8	F4JJL8	872	SBT3.15	Subtilisin-like protease SBT3.15		cytosol [GO:0005829];extracellular space [GO:0005615]	serine-type endopeptidase activity [GO:0004252]	+	8	2	2	11	2.9	2.9	81.478	1	-2	384870000	16	7710000	7087200	0	0	26153000	16676000	13139000	10654000	27717000	17642000	23628000	22459000	12505000	22312000	17955000	12929000	29867000	14049000	19619000	31453000	20050000	10906000	10384000	9971600	4.1	4.1	1.2
+	1.96601	1.9968	P42737	P42737	1770	BCA2	Beta carbonic anhydrase 2, chloroplastic	carbon utilization [GO:0015976];cyanate catabolic process [GO:0009440];defense response to bacterium [GO:0042742]	apoplast [GO:0048046];chloroplast [GO:0009507];chloroplast envelope [GO:0009941];chloroplast stroma [GO:0009570];chloroplast thylakoid membrane [GO:0009535];cytoplasm [GO:0005737];cytosol [GO:0005829];plastid [GO:0009536]	carbonate dehydratase activity [GO:0004089];zinc ion binding [GO:0008270]	+	49	32	32	66.2	49.5	49.5	36.615	0	323.31	519190000000	840	84196000	34430000	134130000	56594000	232600000	71038000	71574000	81422000	34868000000	31941000000	36773000000	32441000000	27068000000	27925000000	27379000000	30983000000	39068000000	29161000000	38189000000	35634000000	32960000000	30204000000	32457000000	31377000000	32.9	24.5	27.8
+	4.52799	1.9894	Q9LKR3	Q9LKR3	4548	BIP1	Heat shock 70 kDa protein BIP1	cellular response to unfolded protein [GO:0034620];chaperone cofactor-dependent protein refolding [GO:0051085];endoplasmic reticulum unfolded protein response [GO:0030968];protein refolding [GO:0042026];response to unfolded protein [GO:0006986];ubiquitin-dependent ERAD pathway [GO:0030433]	cell wall [GO:0005618];chloroplast [GO:0009507];cytoplasm [GO:0005737];cytosol [GO:0005829];endoplasmic reticulum [GO:0005783];endoplasmic reticulum chaperone complex [GO:0034663];endoplasmic reticulum lumen [GO:0005788];Golgi apparatus [GO:0005794];mediator complex [GO:0016592];membrane [GO:0016020];nucleus [GO:0005634];plasma membrane [GO:0005886];plasmodesma [GO:0009506];secretory vesicle [GO:…	ATP binding [GO:0005524];ATPase activity [GO:0016887];heat shock protein binding [GO:0031072];misfolded protein binding [GO:0051787];protein folding chaperone [GO:0044183];unfolded protein binding [GO:0051082]	+	104	104	11	82.4	82.4	15.1	73.628	0	323.31	676210000000	2341	32400000000	34087000000	26632000000	28440000000	45462000000	46578000000	47785000000	44654000000	22120000000	20015000000	22021000000	21405000000	22231000000	23911000000	24311000000	25371000000	25484000000	17399000000	24114000000	25716000000	25867000000	23200000000	24046000000	22958000000	80.9	81.3	74.9
+	3.55058	1.98398	Q42510	Q42510	2273	GN	ARF guanine-nucleotide exchange factor GNOM	basipetal auxin transport [GO:0010540];cell adhesion [GO:0007155];cell wall organization [GO:0071555];cellular response to cold [GO:0070417];cytokinesis by cell plate formation [GO:0000911];embryo development ending in seed dormancy [GO:0009793];embryonic pattern specification [GO:0009880];endocytosis [GO:0006897];endosome transport via multivesicular body sorting pathway [GO:0032509];establishme…	cytosol [GO:0005829];endosome [GO:0005768];endosome membrane [GO:0010008];plasma membrane [GO:0005886]	ARF guanyl-nucleotide exchange factor activity [GO:0005086];identical protein binding [GO:0042802];protein homodimerization activity [GO:0042803]	+	25	22	22	20.5	19	19	162.62	0	51.716	7983400000	83	1820500000	1080500000	653580000	881680000	1016400000	478530000	713190000	1173900000	32019000	7816400	50208000	0	9455300	28997000	11670000	10783000	5727600	0	8423900	0	0	0	0	0	16.7	18.5	18.1
+	2.83275	1.96005	Q9SUE9	Q9SUE9	5642	At4g08310	DNA ligase		nucleus [GO:0005634]	ligase activity [GO:0016874]	+	6	6	6	11.9	11.9	11.9	56.235	0	4.7491	1112800000	12	34523000	23899000	4562600	0	27421000	247210000	37765000	32388000	0	0	125100000	0	102250000	112950000	120730000	122640000	121330000	0	0	0	0	0	0	0	5.4	6.7	1.6
+	3.00213	1.95598	P10795	P10795	1628	RBCS-1A	Ribulose bisphosphate carboxylase small chain 1A, chloroplastic	chloroplast ribulose bisphosphate carboxylase complex assembly [GO:0110102];photorespiration [GO:0009853];photosynthesis [GO:0015979];reductive pentose-phosphate cycle [GO:0019253];response to blue light [GO:0009637];response to cold [GO:0009409];response to far red light [GO:0010218];response to red light [GO:0010114]	apoplast [GO:0048046];chloroplast [GO:0009507];chloroplast envelope [GO:0009941];chloroplast membrane [GO:0031969];chloroplast stroma [GO:0009570];chloroplast thylakoid membrane [GO:0009535];cytosolic ribosome [GO:0022626];mitochondrion [GO:0005739];thylakoid [GO:0009579];thylakoid lumen [GO:0031977]	copper ion binding [GO:0005507];monooxygenase activity [GO:0004497];ribulose-bisphosphate carboxylase activity [GO:0016984]	+	28	18	18	64.4	64.4	64.4	20.216	0	323.31	849920000000	1020	45506000	20007000	6906300	12874000	95013000	107080000	88357000	21786000	55983000000	55613000000	65166000000	56854000000	42859000000	43082000000	52367000000	52348000000	52510000000	40168000000	56757000000	56290000000	52446000000	54668000000	55313000000	57098000000	59.4	47.2	38.9
+	3.93976	1.9453	Q9M888	Q9M888	5064	CCT6A	T-complex protein 1 subunit zeta 1	protein folding [GO:0006457];response to cadmium ion [GO:0046686];response to zinc ion [GO:0010043]	chaperonin-containing T-complex [GO:0005832];cytoplasm [GO:0005737];cytosol [GO:0005829]	ATP binding [GO:0005524];unfolded protein binding [GO:0051082]	+	50	50	16	74.8	74.8	22.8	58.949	0	323.31	58500000000	616	5353900000	5858500000	4742800000	3954600000	7075300000	7681400000	6734800000	6976200000	660590000	633090000	758210000	553960000	463190000	672700000	619260000	504540000	865220000	533340000	956770000	893270000	553790000	455450000	463110000	536120000	74.8	74.8	73.3
+	1.79982	1.94341	Q9LUG5	Q9LUG5	4744	At3g23620	Ribosome production factor 2 homolog	maturation of LSU-rRNA from tricistronic rRNA transcript (SSU-rRNA, 5.8S rRNA, LSU-rRNA) [GO:0000463];ribosomal large subunit assembly [GO:0000027];RNA biosynthetic process [GO:0032774]	nucleolus [GO:0005730]	rRNA binding [GO:0019843]	+	16	16	16	52.5	52.5	52.5	35.727	0	56.873	2446100000	48	133350000	173550000	71832000	84303000	300300000	345760000	284000000	254910000	50937000	53709000	67056000	57556000	57714000	57165000	55415000	44808000	55620000	48979000	46055000	43305000	38085000	42153000	42748000	36836000	32.2	32.2	18.2
+	1.79579	1.94124	Q96328	Q96328	3608	SAC8	Phosphoinositide phosphatase SAC8	phosphatidylinositol dephosphorylation [GO:0046856]	endoplasmic reticulum [GO:0005783];endoplasmic reticulum membrane [GO:0005789];integral component of membrane [GO:0016021]	phosphatidylinositol-4-phosphate phosphatase activity [GO:0043812]	+	2	1	1	3.2	1.7	1.7	66.463	1	-2	199520000	7	0	0	0	0	0	0	0	0	17495000	13521000	12831000	17642000	11761000	13534000	15827000	15117000	11850000	12034000	19713000	16733000	9664000	11798000	0	0	1.5	0	0
+	3.02578	1.93916	A0A1I9LT48	A0A1I9LT48	72	CHUP1	Hydroxyproline-rich glycoprotein family protein				+	10	10	10	12.4	12.4	12.4	112.2	0	7.6887	1573300000	44	8201700	8425800	0	5731500	0	12872000	0	0	79052000	104510000	123660000	118960000	75259000	115140000	75273000	110980000	105860000	101000000	116510000	127240000	67464000	67364000	80541000	69301000	0.6	0.6	0
+	4.07203	1.93782	P42731	P42731	1767	PAB2	Polyadenylate-binding protein 2	nuclear-transcribed mRNA catabolic process, nonsense-mediated decay [GO:0000184];regulation of nuclear-transcribed mRNA catabolic process, deadenylation-dependent decay [GO:1900151];regulation of nuclear-transcribed mRNA poly(A) tail shortening [GO:0060211];regulation of translational initiation [GO:0006446];translational initiation [GO:0006413];viral process [GO:0016032]	cytoplasm [GO:0005737];cytosol [GO:0005829];nucleus [GO:0005634];plasma membrane [GO:0005886];ribonucleoprotein complex [GO:1990904]	mRNA 3'-UTR binding [GO:0003730];mRNA binding [GO:0003729];poly(A) binding [GO:0008143];poly(U) RNA binding [GO:0008266];RNA binding [GO:0003723];translation initiation factor activity [GO:0003743]	+	62	61	59	66	66	62.2	68.672	0	323.31	61111000000	577	5648000000	5383100000	3536200000	4279800000	4845400000	5150900000	5983000000	5871800000	1754800000	1699800000	1675100000	1315300000	996740000	1247500000	1140100000	1253300000	1553100000	1027000000	1515200000	1589600000	1106800000	952240000	891140000	694620000	60.3	63.3	59.1
+	1.86581	1.91834	A0A1I9LTH3	A0A1I9LTH3	75	At3g10250	Histidine-tRNA ligase			ligase activity [GO:0016874]	+	2	2	2	7.1	7.1	7.1	33.14	0	3.5848	547170000	7	37628000	48091000	31718000	13100000	35090000	32675000	52391000	35799000	21591000	19976000	16104000	21345000	16478000	19769000	14204000	20335000	12956000	13385000	14727000	16111000	18340000	13788000	11431000	10140000	7.1	7.1	7.1
+	2.07647	1.91794	O80897	O80897	1487	At2g32600	At2g32600/T26B15.16	spliceosomal complex assembly [GO:0000245]	catalytic step 2 spliceosome [GO:0071013];U2 snRNP [GO:0005686];U2-type prespliceosome [GO:0071004]	nucleic acid binding [GO:0003676];zinc ion binding [GO:0008270]	+	12	12	12	42.6	42.6	42.6	31.369	0	76.852	3345800000	73	257480000	278820000	182570000	178550000	358000000	318590000	258390000	221820000	79342000	71304000	58583000	105300000	78343000	116980000	68976000	99998000	99119000	49136000	96103000	81911000	63133000	66716000	75147000	81441000	32.1	35.7	30.7
+	1.64036	1.9173	Q9FVQ1	Q9FVQ1	4274	NUCL1	Nucleolin 1	cotyledon vascular tissue pattern formation [GO:0010588];endonucleolytic cleavage involved in rRNA processing [GO:0000478];leaf development [GO:0048366];leaf vascular tissue pattern formation [GO:0010305];petal vascular tissue pattern formation [GO:0080056];ribosome biogenesis [GO:0042254];root development [GO:0048364];rRNA processing [GO:0006364];sepal vascular tissue pattern formation [GO:00800…	mitochondrion [GO:0005739];nucleolus [GO:0005730];nucleus [GO:0005634]	DNA binding [GO:0003677];mRNA binding [GO:0003729]	+	54	54	54	53	53	53	58.773	0	323.31	43445000000	266	2605100000	2973800000	2275900000	2256000000	8146900000	8218700000	7855100000	8486600000	49622000	70511000	21970000	21183000	79091000	69170000	43760000	42431000	26090000	75332000	49822000	0	25433000	4501900	47937000	0	51.7	51.7	46.3
+	4.16604	1.91116	F4IWV2	F4IWV2	743	At3g55410	2-oxoglutarate dehydrogenase, E1 component	tricarboxylic acid cycle [GO:0006099]	cytosol [GO:0005829];mitochondrion [GO:0005739];oxoglutarate dehydrogenase complex [GO:0045252]	cobalt ion binding [GO:0050897];oxoglutarate dehydrogenase (succinyl-transferring) activity [GO:0004591];thiamine pyrophosphate binding [GO:0030976];zinc ion binding [GO:0008270]	+	110	110	87	67.4	67.4	57.1	115.16	0	323.31	251700000000	2173	14318000000	16940000000	12543000000	12976000000	20257000000	20135000000	18516000000	19154000000	8038700000	7310100000	9310000000	8094100000	5307500000	6612500000	6769400000	6897800000	8343800000	5414500000	8588000000	9253500000	7099100000	5904700000	7218000000	6700200000	64.9	66	65.4
+	3.01173	1.90036	B3H797	B3H797	419	At4g36210	Transmembrane/coiled-coil protein (DUF726)		integral component of membrane [GO:0016021]		+	7	7	7	11.8	11.8	11.8	72.747	0	4.5756	683220000	13	58166000	54667000	44796000	56773000	84832000	108490000	43154000	56876000	11370000	0	17010000	22543000	20031000	6032000	4818800	3861800	7238000	30377000	19677000	20184000	0	0	0	12327000	7.1	4.2	4.6
+	2.18763	1.89177	Q9LPL6	Q9LPL6	4613	TOL3	TOM1-like protein 3	intracellular protein transport [GO:0006886]	membrane [GO:0016020]		+	13	13	11	29.2	29.2	27.7	55.791	0	151.35	6417400000	108	367500000	354070000	306680000	289010000	412750000	339010000	414030000	389890000	243240000	255990000	322050000	209600000	177230000	232270000	256340000	194530000	250430000	138150000	248710000	248760000	180730000	196410000	181710000	208350000	20.8	23.1	24.7
+	1.97783	1.89012	Q94AH8	Q94AH8	3474	TPS6	Alpha,alpha-trehalose-phosphate synthase [UDP-forming] 6	trehalose biosynthetic process [GO:0005992]	cytoplasm [GO:0005737];cytosol [GO:0005829]	alpha,alpha-trehalose-phosphate synthase (UDP-forming) activity [GO:0003825];trehalose-phosphatase activity [GO:0004805]	+	14	8	7	19.7	10.9	9.7	97.702	0	3.854	772030000	12	30547000	25557000	19563000	18633000	65506000	83467000	75390000	85287000	21135000	33406000	24076000	15450000	22115000	35842000	23466000	25910000	27741000	19414000	28122000	21197000	25785000	13770000	18891000	11763000	11.7	13.7	9.9
+	1.59086	1.88031	F4IDJ0	F4IDJ0	659	YUP8H12R.24	Binding protein		nucleus [GO:0005634]	chromatin binding [GO:0003682]	+	13	13	13	14.1	14.1	14.1	94.889	0	21.155	2964700000	39	193280000	340920000	331280000	259360000	105960000	475990000	408350000	76698000	51562000	44678000	40271000	4703400	18264000	24630000	49367000	67532000	57443000	56564000	108740000	67771000	58654000	32930000	56628000	33085000	10.8	8.9	7.7
+	2.36224	1.87241	Q9FFV2	Q9FFV2	3919	MBG8.1	Trafficking protein particle complex subunit	Golgi vesicle transport [GO:0048193]	endoplasmic reticulum [GO:0005783];Golgi apparatus [GO:0005794];TRAPP complex [GO:0030008]		+	12	12	12	55.4	55.4	55.4	20.759	0	47.123	4536200000	86	346940000	257730000	165050000	250900000	354150000	475010000	417020000	384380000	138900000	82969000	124030000	110790000	107950000	103930000	117780000	99486000	162220000	105060000	134730000	142460000	97030000	119270000	131390000	107000000	43	39.8	33.3
+	2.80887	1.86483	Q9S7P3	Q9S7P3	5157	KIN7N	Kinesin-like protein KIN-7N	microtubule-based movement [GO:0007018]	kinesin complex [GO:0005871];microtubule [GO:0005874]	ATP binding [GO:0005524];ATPase activity [GO:0016887];microtubule binding [GO:0008017];microtubule motor activity [GO:0003777]	+	1	1	1	1.2	1.2	1.2	93.148	1	-2	428980000	6	0	0	0	0	0	0	0	0	28997000	35065000	36703000	23790000	24850000	30733000	26513000	30724000	32185000	22434000	24063000	20051000	22947000	20584000	23447000	25895000	0	0	0
+	2.9316	1.8634	O48726	O48726	1287	RPN13	26S proteasome regulatory subunit RPN13	ubiquitin-dependent protein catabolic process [GO:0006511]	cytoplasm [GO:0005737];nucleus [GO:0005634];proteasome regulatory particle, lid subcomplex [GO:0008541]	endopeptidase activator activity [GO:0061133];proteasome binding [GO:0070628];ubiquitin binding [GO:0043130]	+	8	8	8	35	35	35	33.297	0	25.24	1117600000	33	99441000	70221000	49696000	44776000	96331000	149370000	153070000	133870000	35066000	37904000	26825000	12333000	21325000	14529000	11337000	25959000	19784000	16584000	28495000	28313000	9308500	9139500	16039000	7915100	28	23.3	23.3
+	1.52188	1.85962	Q8LBK6	Q8LBK6	2869	GRXS15	Monothiol glutaredoxin-S15, mitochondrial		cytosol [GO:0005829];mitochondrial matrix [GO:0005759];mitochondrion [GO:0005739]	2 iron, 2 sulfur cluster binding [GO:0051537];electron transfer activity [GO:0009055];metal ion binding [GO:0046872];protein disulfide oxidoreductase activity [GO:0015035]	+	6	6	6	41.4	41.4	41.4	18.734	0	23.778	3614000000	60	262150000	230080000	143200000	156140000	367100000	366750000	404380000	379630000	130340000	92613000	81777000	88809000	67541000	82833000	67434000	65862000	99749000	75403000	98653000	75864000	101240000	64210000	62273000	49932000	41.4	41.4	34.3
+	3.08399	1.85713	Q9XIE2	Q9XIE2	5856	ABCG36	ABC transporter G family member 36	auxin polar transport [GO:0009926];cadmium ion transport [GO:0015691];cellular detoxification [GO:1990748];cellular response to indolebutyric acid stimulus [GO:0071366];cotyledon development [GO:0048825];coumarin metabolic process [GO:0009804];defense response by callose deposition in cell wall [GO:0052544];defense response to bacterium [GO:0042742];defense response to fungus [GO:0050832];defense…	chloroplast [GO:0009507];chloroplast envelope [GO:0009941];endoplasmic reticulum [GO:0005783];integral component of membrane [GO:0016021];mitochondrion [GO:0005739];plasma membrane [GO:0005886];trans-Golgi network [GO:0005802];vacuolar membrane [GO:0005774]	ATP binding [GO:0005524];ATPase activity [GO:0016887];ATPase-coupled transmembrane transporter activity [GO:0042626];auxin efflux transmembrane transporter activity [GO:0010329];cadmium ion transmembrane transporter activity [GO:0015086];efflux transmembrane transporter activity [GO:0015562]	+	27	27	11	19.7	19.7	9.7	165.08	0	71.632	4426900000	160	377980000	351950000	265080000	281820000	390690000	520540000	439200000	375730000	61131000	99133000	75046000	112800000	114460000	171570000	164460000	92723000	61533000	60385000	67166000	29172000	94035000	84723000	98212000	37357000	12.7	12.4	10.1
+	5.03839	1.85363	P54150	P54150	1892	MSR4	Peptide methionine sulfoxide reductase A4, chloroplastic	cellular response to oxidative stress [GO:0034599];response to light stimulus [GO:0009416]	chloroplast [GO:0009507];chloroplast envelope [GO:0009941];chloroplast stroma [GO:0009570];cytoplasm [GO:0005737];cytosol [GO:0005829];mitochondrion [GO:0005739]	L-methionine-(S)-S-oxide reductase activity [GO:0036456];peptide-methionine (S)-S-oxide reductase activity [GO:0008113]	+	20	20	20	72.9	72.9	72.9	28.644	0	323.31	193040000000	427	1586800000	1896900000	1385500000	1307400000	1652200000	1684500000	1595600000	1630000000	12362000000	12434000000	13335000000	11259000000	8589100000	9858200000	10274000000	10474000000	13927000000	8789000000	13952000000	12668000000	10766000000	10496000000	11004000000	10115000000	51.2	51.2	51.2
+	2.23393	1.85322	Q96253	Q96253	3594	At1g51650	ATP synthase subunit epsilon, mitochondrial	ATP synthesis coupled proton transport [GO:0015986]	mitochondrial inner membrane [GO:0005743];mitochondrial proton-transporting ATP synthase complex [GO:0005753];mitochondrial proton-transporting ATP synthase complex, catalytic core F(1) [GO:0000275];mitochondrion [GO:0005739];nucleus [GO:0005634]	proton-transporting ATP synthase activity, rotational mechanism [GO:0046933]	+	3	3	3	38.6	38.6	38.6	7.8319	0.0014892	2.2945	289710000	15	0	4043200	0	0	17672000	17224000	7139000	10355000	10106000	7739300	18424000	8669400	9634200	10591000	9977100	29210000	24735000	15257000	11530000	25719000	21628000	14289000	9710500	6061500	0	14.3	0
+	2.73566	1.84648	Q9SI37	Q9SI37	5347	WRKY1	WRKY transcription factor 1	positive regulation of transcription, DNA-templated [GO:0045893];response to salicylic acid [GO:0009751];salicylic acid mediated signaling pathway [GO:0009863]	mitochondrion [GO:0005739];nucleus [GO:0005634]	DNA binding [GO:0003677];DNA-binding transcription factor activity [GO:0003700];sequence-specific DNA binding [GO:0043565];zinc ion binding [GO:0008270]	+	11	11	11	21.8	21.8	21.8	54.01	0	19.132	40011000000	38	1549400000	2138000000	1284300000	2458300000	477310000	921640000	1156400000	855790000	1565800000	2429400000	2006600000	1520400000	1664800000	1905200000	1950400000	1826700000	1873800000	1907700000	1542500000	1391100000	1931100000	1694200000	1870500000	2089700000	5.3	1.8	1.8
+	3.36013	1.83947	Q9SD97	Q9SD97	5258	At5g07870	HXXXD-type acyl-transferase family protein			transferase activity, transferring acyl groups other than amino-acyl groups [GO:0016747]	+	25	10	10	44.2	26.1	26.1	51.737	0	108.69	5631300000	47	848950000	771170000	593230000	417260000	677880000	677500000	629960000	714110000	27679000	15500000	31990000	32339000	4213300	19193000	8532400	22778000	35570000	6208600	22655000	34980000	18222000	5886700	7544700	7972600	44.2	44.2	39.2
+	2.78527	1.83381	Q9LFE4	Q9LFE4	4415	At5g16730	WEB family protein At5g16730, chloroplastic	reciprocal meiotic recombination [GO:0007131]	chloroplast [GO:0009507];microtubule associated complex [GO:0005875];plastid [GO:0009536]		+	7	7	7	10.1	10.1	10.1	96.207	0	15.703	703860000	20	70536000	52478000	39621000	37692000	121260000	61325000	60154000	48127000	30194000	20477000	10459000	7595300	17930000	26919000	9147400	9255100	12897000	6829500	10877000	16504000	10048000	5825400	8475500	9235600	6.4	5.4	4.1
+	1.60794	1.81637	Q9FFV1;P41568	Q9FFV1;P41568	3918	MBG8.2;At4g27130	At5g54760;Protein translation factor SUI1 homolog 1		cytosol [GO:0005829];plastid [GO:0009536]	RNA binding [GO:0003723];translation initiation factor activity [GO:0003743]	+	10	10	10	73.5	73.5	73.5	12.62	0	39.012	3437100000	66	180340000	166460000	102410000	120460000	211070000	189680000	236670000	267330000	142450000	107860000	79761000	81863000	161260000	219820000	107000000	146160000	150170000	99576000	150740000	131550000	121940000	90120000	92801000	79550000	51.3	50.4	27.4
+	2.09759	1.81325	Q9LZQ9	Q9LZQ9	4915	At3g62310	Probable pre-mRNA-splicing factor ATP-dependent RNA helicase DEAH2	mRNA processing [GO:0006397];RNA splicing [GO:0008380]	cytosol [GO:0005829];nucleolus [GO:0005730];spliceosomal complex [GO:0005681]	ATP binding [GO:0005524];RNA binding [GO:0003723];RNA helicase activity [GO:0003724]	+	30	30	9	44.4	44.4	14.2	82.693	0	114.72	7507700000	133	776880000	843680000	702960000	640310000	981150000	823920000	886280000	897310000	59971000	46353000	83663000	60557000	55909000	55767000	87150000	81556000	64450000	47368000	68782000	64776000	75467000	43007000	32627000	27763000	38.8	39.7	38.6
+	2.50957	1.80114	F4K0E6	F4K0E6	972	MUP24.1	DHBP synthase RibB-like alpha/beta domain-containing protein	regulation of translational fidelity [GO:0006450]	cytoplasm [GO:0005737]	double-stranded RNA binding [GO:0003725];nucleotidyltransferase activity [GO:0016779];tRNA binding [GO:0000049]	+	3	3	3	12.5	12.5	12.5	31.303	0	7.388	533950000	9	12785000	6275900	0	0	20038000	9609600	11462000	12951000	26014000	31394000	17089000	7617800	45131000	41885000	46235000	54373000	26700000	6571100	32130000	23028000	47331000	10726000	14243000	30364000	4.2	4.2	0
+	3.08566	1.79721	Q93W34	Q93W34	3294	RBP45C	Polyadenylate-binding protein RBP45C	mRNA processing [GO:0006397]	cytosol [GO:0005829];nucleus [GO:0005634]	mRNA binding [GO:0003729];poly(A) binding [GO:0008143]	+	18	18	17	42.9	42.9	41	44.972	0	323.31	53277000000	450	3839500000	3518900000	3149500000	2795200000	4589800000	4182900000	4451100000	4469900000	1195500000	1151800000	1463500000	1484000000	1149000000	1263500000	1400700000	1584200000	1664500000	1158200000	1673400000	1799300000	1379300000	1414800000	1129800000	1369100000	42.9	42.9	42.9
+	1.95652	1.7938	F4I600	F4I600	618	At1g16820	Vacuolar ATP synthase catalytic subunit-related / V-ATPase-related / vacuolar proton pump-like protein		nucleus [GO:0005634];vacuolar membrane [GO:0005774];vacuole [GO:0005773]		+	3	2	2	22.6	22.6	22.6	10.444	0	42.027	1558400000	8	0	334530000	0	220480000	514500000	0	0	11485000	0	0	0	0	36092000	37661000	64178000	0	229900000	0	0	109600000	0	0	0	0	6.5	22.6	6.5
+	1.57454	1.79278	Q5S1W2	Q5S1W2	2378	BON2	Protein BONZAI 2	cellular response to calcium ion [GO:0071277];defense response [GO:0006952];negative regulation of cell death [GO:0060548]	plasma membrane [GO:0005886];plasmodesma [GO:0009506]	calcium-dependent phospholipid binding [GO:0005544];metal ion binding [GO:0046872]	+	6	6	6	10.8	10.8	10.8	64.033	0.00057263	2.7222	1925800000	16	0	17034000	19058000	18636000	50269000	48432000	72773000	51051000	159740000	186830000	197480000	168000000	100220000	114650000	112260000	91789000	112830000	79344000	102720000	103350000	0	0	119360000	0	1.5	2	4.3
+	1.78234	1.79247	Q9SJF3	Q9SJF3	5403	At1g08370	mRNA-decapping enzyme-like protein	deadenylation-dependent decapping of nuclear-transcribed mRNA [GO:0000290];deadenylation-independent decapping of nuclear-transcribed mRNA [GO:0031087];defense response [GO:0006952];mRNA processing [GO:0006397]	cytoplasm [GO:0005737];extracellular region [GO:0005576];P-body [GO:0000932]	enzyme activator activity [GO:0008047];enzyme regulator activity [GO:0030234];hydrolase activity [GO:0016787];mRNA binding [GO:0003729]	+	13	13	13	47.4	47.4	47.4	40.61	0	106	4440100000	96	316310000	293400000	267900000	163520000	465070000	483590000	502700000	553690000	128090000	97237000	121870000	131850000	78729000	46319000	72026000	77810000	61792000	49702000	79798000	100710000	90373000	81931000	95670000	79979000	28.3	33.2	34.9
+	1.7277	1.78002	A8MQJ1	A8MQJ1	379	TYRDC	L-tyrosine decarboxylase	cellular amino acid metabolic process [GO:0006520];response to water deprivation [GO:0009414];response to wounding [GO:0009611];tyramine biosynthetic process [GO:1901695]	cytoplasm [GO:0005737]	aromatic-L-amino-acid decarboxylase activity [GO:0004058];pyridoxal phosphate binding [GO:0030170];tyrosine decarboxylase activity [GO:0004837]	+	3	2	2	4.4	3.3	3.3	61.031	1	-2	320720000	9	0	0	0	0	0	0	0	0	29083000	36005000	0	27269000	39063000	7836800	33663000	39177000	36657000	8378900	15202000	15095000	13510000	13217000	0	6563300	1.5	1.5	0
+	1.5266	1.77597	Q94AI7	Q94AI7	3477	TPL	Protein TOPLESS	jasmonic acid mediated signaling pathway [GO:0009867];negative regulation of transcription, DNA-templated [GO:0045892];primary shoot apical meristem specification [GO:0010072];regulation of transcription, DNA-templated [GO:0006355];response to auxin [GO:0009733];xylem and phloem pattern formation [GO:0010051]	cytosol [GO:0005829];nucleus [GO:0005634]	identical protein binding [GO:0042802];protein homodimerization activity [GO:0042803]	+	78	78	22	67	67	27.9	124.3	0	323.31	64432000000	909	4073100000	4663800000	3757400000	3521000000	5980300000	4681100000	4827100000	4954600000	1915100000	1660200000	1811800000	1949500000	1483600000	1645200000	1528600000	1791400000	1742200000	1148700000	1838400000	1756100000	1853800000	2037800000	1895900000	1915500000	59.7	55.2	54
+	3.22407	1.7681	Q9SUM7	Q9SUM7	5652	At4g20520	RNA binding / RNA-directed DNA polymerase			RNA-directed DNA polymerase activity [GO:0003964]	+	2	2	2	5.1	5.1	5.1	42.445	0.0054074	1.7902	244390000	2	0	0	0	0	0	0	0	0	32765000	0	0	20053000	10220000	23611000	18642000	18653000	95076000	0	25367000	0	0	0	0	0	0	0	0
+	1.47763	1.76472	F4JF82	F4JF82	840	At3g55020	Ypt/Rab-GAP domain of gyp1p superfamily protein	activation of GTPase activity [GO:0090630];intracellular protein transport [GO:0006886]	cytosol [GO:0005829]	GTPase activator activity [GO:0005096];Rab GTPase binding [GO:0017137]	+	18	18	18	24.4	24.4	24.4	91.753	0	48.433	4197500000	52	523390000	509640000	403100000	361380000	683000000	600880000	447320000	485620000	18495000	5209000	19356000	23953000	12575000	13558000	5002000	37184000	10131000	9155500	8970100	10093000	3218800	0	0	6216500	24.4	23	21.4
+	1.94622	1.76265	O80504	O80504	1445	CPN10-2	10 kDa chaperonin 2, chloroplastic	chaperone cofactor-dependent protein refolding [GO:0051085];protein folding [GO:0006457]	chloroplast [GO:0009507];chloroplast envelope [GO:0009941];chloroplast stroma [GO:0009570];cytosol [GO:0005829];mitochondrial matrix [GO:0005759];plastid [GO:0009536]	chaperone binding [GO:0051087];metal ion binding [GO:0046872];protein domain specific binding [GO:0019904];unfolded protein binding [GO:0051082]	+	13	13	12	66.9	66.9	66.9	15.049	0	323.31	22697000000	166	21022000	28267000	38314000	14580000	57820000	120820000	151890000	159310000	1972600000	1542500000	1485900000	1377400000	1174600000	1251200000	1379000000	1267000000	1598800000	1588800000	1575100000	1569600000	1275400000	999400000	1146300000	901630000	11.5	22.3	41.7
+	2.06133	1.76192	Q9FMM0	Q9FMM0	4173	UBC18	Probable ubiquitin-conjugating enzyme E2 18	proteasome-mediated ubiquitin-dependent protein catabolic process [GO:0043161];protein polyubiquitination [GO:0000209]	nucleus [GO:0005634]	ATP binding [GO:0005524];ubiquitin conjugating enzyme activity [GO:0061631]	+	4	2	2	16.8	6.2	6.2	18.372	0	4.1894	560620000	11	50502000	49195000	40651000	38422000	64461000	60768000	66403000	62098000	0	0	0	10088000	16047000	19715000	12867000	13963000	8750400	11101000	13756000	11086000	0	0	0	10743000	11.2	11.2	11.2
+	1.39922	1.7611	Q38942	Q38942	2163	RAE1	Protein RAE1	mRNA transport [GO:0051028];protein transport [GO:0015031];RNA export from nucleus [GO:0006405];transcription-dependent tethering of RNA polymerase II gene DNA at nuclear periphery [GO:0000972]	Cul4-RING E3 ubiquitin ligase complex [GO:0080008];cytosol [GO:0005829];nuclear envelope [GO:0005635];nuclear pore [GO:0005643]	RNA binding [GO:0003723];ubiquitin binding [GO:0043130]	+	12	12	12	47.3	47.3	47.3	38.268	0	67.812	2961700000	81	188310000	224170000	90580000	110280000	44160000	154160000	125000000	106710000	144480000	126990000	192220000	131380000	71150000	97557000	88994000	122710000	145120000	56935000	159600000	139350000	153790000	89104000	98414000	100530000	39	43.3	15.5
+	2.15659	1.74768	Q2V3E2	Q2V3E2	2128	At4g27740	Protein yippee-like At4g27740		plasma membrane [GO:0005886]	metal ion binding [GO:0046872]	+	8	8	8	78.1	78.1	78.1	11.781	0	14.744	1195300000	40	0	0	0	0	0	0	0	0	81368000	22780000	42698000	16553000	96451000	124710000	107280000	92560000	60393000	65563000	84790000	40940000	97307000	54261000	111200000	96479000	0	0	0
+	3.45071	1.74176	Q5HZ00	Q5HZ00	2368	SPS3	Solanesyl diphosphate synthase 3, chloroplastic/mitochondrial	embryo development ending in seed dormancy [GO:0009793];isoprenoid biosynthetic process [GO:0008299];plastoquinone biosynthetic process [GO:0010236];ubiquinone biosynthetic process [GO:0006744]	chloroplast [GO:0009507];mitochondrion [GO:0005739];plastid [GO:0009536];transferase complex [GO:1990234]	all-trans-nonaprenyl-diphosphate synthase (geranylgeranyl-diphosphate specific) activity [GO:0052924];farnesyltranstransferase activity [GO:0004311];metal ion binding [GO:0046872];prenyltransferase activity [GO:0004659];trans-octaprenyltranstransferase activity [GO:0050347]	+	8	8	8	24.6	24.6	24.6	46.401	0	13.074	945890000	25	33357000	124730000	101690000	72842000	152820000	121650000	99343000	151470000	0	0	0	5095500	3161800	5688900	8327300	7853400	23469000	3399100	23096000	7896200	0	0	0	0	13.5	15.4	18.2
+	1.32639	1.73853	F4KAB8	F4KAB8	1033	MCM6	DNA replication licensing factor MCM6	DNA replication initiation [GO:0006270];DNA unwinding involved in DNA replication [GO:0006268];double-strand break repair via break-induced replication [GO:0000727];mitotic DNA replication [GO:1902969];pre-replicative complex assembly involved in nuclear cell cycle DNA replication [GO:0006267]	MCM complex [GO:0042555];nucleus [GO:0005634];THO complex [GO:0000347]	ATP binding [GO:0005524];DNA helicase activity [GO:0003678];DNA replication origin binding [GO:0003688];metal ion binding [GO:0046872];single-stranded DNA binding [GO:0003697]	+	14	14	14	19.7	19.7	19.7	92.85	0	19.514	59833000000	48	245100000	251040000	197020000	180400000	147360000	178130000	175670000	257630000	3827400000	3756800000	4023500000	3513500000	4168100000	4085300000	3682800000	3911600000	3722800000	3664100000	3608400000	3745300000	3517000000	3044100000	2993400000	2936400000	15.3	16.5	15.3
+	1.66266	1.73141	B3H7F6	B3H7F6	420	TIC	Time for coffee	developmental process [GO:0032502];regulation of circadian rhythm [GO:0042752];response to abscisic acid [GO:0009737];response to oxidative stress [GO:0006979];response to water deprivation [GO:0009414];starch metabolic process [GO:0005982]	nucleus [GO:0005634]		+	2	2	2	2	2	2	164.93	0	3.0579	291520000	9	16312000	21886000	31449000	15627000	63467000	37230000	37285000	38370000	4533800	6833300	5157200	0	0	0	0	5938200	3472300	0	0	3955100	0	0	0	0	1.4	1.4	2
+	1.57036	1.72773	O48593	O48593	1279	SYNO	Asparagine--tRNA ligase, chloroplastic/mitochondrial	asparaginyl-tRNA aminoacylation [GO:0006421];plant ovule development [GO:0048481]	chloroplast [GO:0009507];chloroplast stroma [GO:0009570];mitochondrion [GO:0005739]	asparagine-tRNA ligase activity [GO:0004816];ATP binding [GO:0005524];DNA binding [GO:0003677]	+	37	36	36	43.6	43.6	43.6	63.698	0	323.31	79795000000	487	201900000	385420000	308910000	225580000	305330000	362430000	271360000	307230000	5606800000	4996100000	5507800000	5103500000	3389200000	4673300000	4826400000	4851600000	4822300000	3271100000	5380100000	5095300000	5523300000	4779800000	5130100000	4470200000	24.3	29.5	25.7
+	2.14379	1.71837	Q5XF35	Q5XF35	2388	At4g39820	At4g39820		plasma membrane [GO:0005886]		+	10	10	10	31.6	31.6	31.6	46.317	0	19.814	1971400000	49	227650000	263120000	191710000	220170000	235610000	298340000	219370000	262210000	7259900	6281100	6305100	9500600	0	7438700	0	8684400	7695800	0	0	0	0	0	0	0	26.2	28.4	26.2
+	4.30299	1.7176	P28769	P28769	1698	CCT1	T-complex protein 1 subunit alpha	protein folding [GO:0006457]	chaperonin-containing T-complex [GO:0005832];cytosol [GO:0005829]	ATP binding [GO:0005524];unfolded protein binding [GO:0051082]	+	62	62	62	91.6	91.6	91.6	59.229	0	323.31	48409000000	650	3819200000	3999700000	3301300000	3368500000	5244000000	6632100000	5176800000	4868400000	801310000	668110000	699400000	695880000	499730000	620660000	778080000	741120000	1004000000	632320000	963040000	1136100000	666770000	744180000	710560000	638160000	76.9	79.4	80.9
+	1.88916	1.7155	Q9M8R9	Q9M8R9	5073	At3g02770	Putative 4-hydroxy-4-methyl-2-oxoglutarate aldolase 1	regulation of RNA metabolic process [GO:0051252]	cytosol [GO:0005829]	4-hydroxy-4-methyl-2-oxoglutarate aldolase activity [GO:0047443];metal ion binding [GO:0046872];oxaloacetate decarboxylase activity [GO:0008948];ribonuclease inhibitor activity [GO:0008428]	+	15	6	6	66.3	35.5	35.5	17.836	0	98.793	16310000000	98	500660000	450800000	369450000	388880000	123720000	316760000	352660000	536250000	904510000	786170000	802890000	818100000	700590000	900530000	587710000	939870000	911110000	631820000	851930000	887940000	1036400000	904750000	850140000	756770000	66.3	60.2	62.7
+	1.55539	1.71026	Q9C9M7	Q9C9M7	3810	CDKD-2	Cyclin-dependent kinase D-2	cell cycle [GO:0007049];cell division [GO:0051301];positive regulation of long-day photoperiodism, flowering [GO:0048578];positive regulation of transcription by RNA polymerase II [GO:0045944];protein phosphorylation [GO:0006468];regulation of cyclin-dependent protein serine/threonine kinase activity [GO:0000079]	cytoplasm [GO:0005737];nucleus [GO:0005634];transcription factor TFIIK complex [GO:0070985]	ATP binding [GO:0005524];cyclin-dependent protein serine/threonine kinase activity [GO:0004693];protein kinase activity [GO:0004672];protein serine/threonine kinase activity [GO:0004674];RNA polymerase II CTD heptapeptide repeat kinase activity [GO:0008353]	+	6	5	5	19.3	17	17	39.201	0	4.1414	459180000	17	24131000	11049000	20166000	10686000	23968000	20336000	23457000	32178000	3518000	10914000	12619000	17167000	7373000	22541000	27013000	17323000	18147000	2407700	25327000	19675000	42721000	12449000	31238000	22777000	8.3	5.2	5.2
+	1.79977	1.7046	Q9FK88	Q9FK88	4077	INVE	Alkaline/neutral invertase E, chloroplastic	cotyledon development [GO:0048825];starch metabolic process [GO:0005982];sucrose catabolic process [GO:0005987]	chloroplast [GO:0009507]	glycopeptide alpha-N-acetylgalactosaminidase activity [GO:0033926];sucrose alpha-glucosidase activity [GO:0004575]	+	13	13	12	19.9	19.9	19	69.239	0	23.575	3862400000	69	348790000	143150000	90665000	240630000	150810000	541070000	430590000	218830000	152430000	131740000	146450000	176850000	107590000	121210000	125690000	152540000	135790000	123620000	106860000	56416000	40813000	25021000	66071000	28793000	16.9	14.3	8.9
+	1.19075	1.70059	Q9FHM9	Q9FHM9	3985	EXL3	Protein EXORDIUM-like 3	response to karrikin [GO:0080167]	apoplast [GO:0048046];extracellular space [GO:0005615];plant-type cell wall [GO:0009505];plasmodesma [GO:0009506]		+	3	3	3	6.8	6.8	6.8	36.848	0.00094357	2.5365	398970000	5	11345000	0	4099300	0	0	43952000	29141000	18061000	6969300	4691300	6386000	7243300	9182200	46805000	9997200	6185100	44780000	34654000	51113000	51896000	5557900	6906500	0	0	4.2	0	2.7
+	1.22079	1.69595	Q9SA26	Q9SA26	5187	At1g16270	F3O9.7 protein	signal transduction [GO:0007165]	cytoplasm [GO:0005737];cytosol [GO:0005829];nucleus [GO:0005634]	ATP binding [GO:0005524];protein kinase activity [GO:0004672];protein serine/threonine/tyrosine kinase activity [GO:0004712]	+	25	24	13	22	21.3	13.7	126.78	0	35.24	4433000000	108	358820000	380230000	277830000	345550000	597310000	774200000	423880000	526230000	24551000	45991000	58442000	43186000	40180000	77306000	61441000	47087000	38046000	59193000	76518000	20322000	32364000	73408000	20800000	30084000	14.1	16.7	12.6
+	4.23843	1.69524	O23254	O23254	1214	SHM4	Serine hydroxymethyltransferase 4	cellular response to tetrahydrofolate [GO:1904482];circadian rhythm [GO:0007623];folic acid metabolic process [GO:0046655];glycine biosynthetic process from serine [GO:0019264];glycine metabolic process [GO:0006544];L-serine catabolic process [GO:0006565];one-carbon metabolic process [GO:0006730];response to cadmium ion [GO:0046686];tetrahydrofolate interconversion [GO:0035999];tetrahydrofolate m…	cytosol [GO:0005829];plasma membrane [GO:0005886];plasmodesma [GO:0009506]	amino acid binding [GO:0016597];cobalt ion binding [GO:0050897];glycine hydroxymethyltransferase activity [GO:0004372];pyridoxal phosphate binding [GO:0030170];serine binding [GO:0070905];zinc ion binding [GO:0008270]	+	68	68	68	96	96	96	51.717	0	323.31	459840000000	1350	52050000000	54016000000	40505000000	42591000000	40703000000	40366000000	41068000000	41917000000	6302500000	6917300000	7230800000	6931500000	5602300000	6790700000	7144700000	7262700000	5818600000	4728800000	5973300000	6542400000	6888300000	7209000000	7340600000	7936700000	96	95.8	95.3
+	2.59821	1.69178	Q9M099	Q9M099	4936	SCPL24	Serine carboxypeptidase 24	brassinosteroid mediated signaling pathway [GO:0009742];proteolysis [GO:0006508];proteolysis involved in cellular protein catabolic process [GO:0051603]	extracellular space [GO:0005615]	serine-type carboxypeptidase activity [GO:0004185]	+	17	17	15	35.1	35.1	31	52.844	0	35.262	6199300000	126	5153400	62842000	51456000	26889000	80790000	65331000	58027000	58277000	327490000	284110000	395290000	387390000	308210000	409110000	415960000	311810000	352370000	245680000	389050000	339930000	451850000	368260000	431690000	372360000	3.7	10.8	11
+	1.65836	1.6907	Q8H1B3	Q8H1B3	2734	BIP3	Heat shock 70 kDa protein BIP3	cellular response to unfolded protein [GO:0034620];chaperone cofactor-dependent protein refolding [GO:0051085];endoplasmic reticulum unfolded protein response [GO:0030968];pollen tube growth [GO:0009860];protein refolding [GO:0042026];response to unfolded protein [GO:0006986];ubiquitin-dependent ERAD pathway [GO:0030433]	cytoplasm [GO:0005737];endoplasmic reticulum chaperone complex [GO:0034663];endoplasmic reticulum lumen [GO:0005788];mediator complex [GO:0016592];membrane [GO:0016020];nucleus [GO:0005634];secretory vesicle [GO:0099503]	ATP binding [GO:0005524];ATPase activity [GO:0016887];heat shock protein binding [GO:0031072];misfolded protein binding [GO:0051787];protein folding chaperone [GO:0044183];unfolded protein binding [GO:0051082]	+	12	7	7	16.1	9.9	9.9	75.149	0	7.9869	348830000	8	0	0	78971000	32098000	12878000	0	0	11697000	0	0	0	4871200	64864000	15030000	26357000	9212600	0	0	20290000	28845000	35049000	0	0	8672700	5.3	6.2	8.9
+	3.73411	1.68969	Q8GSJ6	Q8GSJ6	2615	LQY1	Protein disulfide-isomerase LQY1, chloroplastic	photosystem II repair [GO:0010206]	chloroplast [GO:0009507];chloroplast stroma [GO:0009570];chloroplast thylakoid [GO:0009534];chloroplast thylakoid membrane [GO:0009535];integral component of membrane [GO:0016021];mitochondrion [GO:0005739]	metal ion binding [GO:0046872];protein disulfide isomerase activity [GO:0003756]	+	2	2	2	28.6	28.6	28.6	16.334	0	46.232	2333800000	21	0	0	13269000	0	0	0	0	0	153700000	121600000	120670000	109050000	121750000	135550000	168690000	184760000	214230000	107000000	202450000	165650000	128020000	119500000	133250000	134650000	0	0	11
+	5.01312	1.68581	P10896	P10896	1630	RCA	Ribulose bisphosphate carboxylase/oxygenase activase, chloroplastic	defense response to bacterium [GO:0042742];leaf senescence [GO:0010150];response to cold [GO:0009409];response to jasmonic acid [GO:0009753];response to light stimulus [GO:0009416]	apoplast [GO:0048046];cell wall [GO:0005618];chloroplast [GO:0009507];chloroplast envelope [GO:0009941];chloroplast stroma [GO:0009570];chloroplast thylakoid membrane [GO:0009535];Golgi apparatus [GO:0005794];nucleus [GO:0005634];plastoglobule [GO:0010287];stromule [GO:0010319];thylakoid [GO:0009579]	ADP binding [GO:0043531];ATP binding [GO:0005524];enzyme regulator activity [GO:0030234];ribulose-1,5-bisphosphate carboxylase/oxygenase activator activity [GO:0046863]	+	61	61	61	85.7	85.7	85.7	51.981	0	323.31	2258200000000	3789	337870000	216750000	326090000	288610000	674650000	793250000	646140000	602090000	158030000000	144520000000	163180000000	159320000000	105070000000	129830000000	143400000000	131350000000	173920000000	127240000000	164250000000	174590000000	121160000000	124890000000	117450000000	116140000000	45.8	38.4	41.4
+	3.03761	1.68572	F4HXZ1	F4HXZ1	569	BRO1	Vacuolar-sorting protein BRO1	endosome to plasma membrane protein transport [GO:0099638];multivesicular body organization [GO:0036257];protein transport to vacuole involved in ubiquitin-dependent protein catabolic process via the multivesicular body sorting pathway [GO:0043328];vacuole organization [GO:0007033]	cytoplasm [GO:0005737];cytosol [GO:0005829];late endosome [GO:0005770];multivesicular body [GO:0005771];plasmodesma [GO:0009506]	protein self-association [GO:0043621];ubiquitin binding [GO:0043130]	+	46	46	46	50.5	50.5	50.5	95.208	0	280.6	24013000000	370	1777600000	1639300000	1328800000	1457500000	2522400000	2323000000	2274900000	1978300000	646100000	577390000	717180000	514800000	580870000	432180000	476820000	474540000	510770000	385440000	484540000	543290000	630240000	646420000	496220000	594730000	45.4	39.8	34.5
+	1.76358	1.68157	F4IAG1	F4IAG1	641	SS3	Starch synthase 3	starch biosynthetic process [GO:0019252]	chloroplast [GO:0009507]	glycogen (starch) synthase activity [GO:0004373];starch binding [GO:2001070];starch synthase activity [GO:0009011]	+	4	4	4	3.6	3.6	3.6	124.23	0	4.4516	244470000	7	0	0	0	13892000	0	0	7118400	0	10195000	11791000	14884000	16131000	12531000	12223000	13974000	11864000	30834000	15016000	11814000	39196000	7214500	0	10326000	5467300	0	0	0
+	1.21529	1.67947	A0A1P8AW47	A0A1P8AW47	150	At1g29320	Transducin/WD40 repeat-like superfamily protein	ribosomal large subunit biogenesis [GO:0042273]	nucleolus [GO:0005730];preribosome, large subunit precursor [GO:0030687]		+	9	9	9	21.5	21.5	21.5	52.341	0	11.382	1114700000	23	118300000	100280000	73525000	74760000	264980000	226430000	113880000	125890000	0	0	0	0	5522000	4256100	0	3066400	0	3818900	0	0	0	0	0	0	14.5	11.5	12.8
+	2.15035	1.67102	B3H4M0	B3H4M0	408	PIFI	Post-illumination chlorophyll fluorescence increase				+	12	12	12	57.5	57.5	57.5	23.99	0	131.46	11730000000	136	0	0	0	0	0	0	0	0	690110000	856660000	834240000	708430000	672160000	742520000	695920000	739300000	721530000	565580000	730260000	739710000	743780000	733360000	688370000	868550000	0	0	0
+	1.92058	1.66908	O82263	O82263	1567	At2g47960	At2g47960/T9J23.10				+	22	22	22	57	57	57	49.289	0	98.497	8912400000	129	649120000	1003300000	816930000	820660000	986280000	1038100000	853400000	1087600000	126570000	126060000	109700000	188980000	71331000	50055000	175880000	59106000	83077000	67190000	129550000	103480000	63517000	162250000	86848000	53479000	43.4	46.8	40
+	2.51236	1.66502	Q9MA79	Q9MA79	5103	CYFBP	Fructose-1,6-bisphosphatase, cytosolic	fructose 1,6-bisphosphate metabolic process [GO:0030388];fructose 6-phosphate metabolic process [GO:0006002];fructose metabolic process [GO:0006000];gluconeogenesis [GO:0006094];photosynthesis [GO:0015979];response to abscisic acid [GO:0009737];response to fructose [GO:0009750];starch catabolic process [GO:0005983];sucrose biosynthetic process [GO:0005986]	cytoplasm [GO:0005737];cytosol [GO:0005829];nucleus [GO:0005634]	fructose 1,6-bisphosphate 1-phosphatase activity [GO:0042132];metal ion binding [GO:0046872]	+	45	45	45	73	73	73	37.287	0	323.31	378220000000	1170	384600000	477100000	301960000	292270000	486050000	532030000	457830000	479810000	28355000000	27183000000	25837000000	24163000000	19295000000	23128000000	23612000000	24094000000	22708000000	17789000000	25823000000	25304000000	23206000000	21979000000	19355000000	22978000000	61	54.5	45.5
+	5.31335	1.66187	Q9C5A9	Q9C5A9	3660	At5g08680	ATP synthase subunit beta-3, mitochondrial	mitochondrial ATP synthesis coupled proton transport [GO:0042776];response to cadmium ion [GO:0046686]	mitochondrial proton-transporting ATP synthase complex [GO:0005753];mitochondrial proton-transporting ATP synthase complex, catalytic core F(1) [GO:0000275];mitochondrion [GO:0005739];plasma membrane [GO:0005886];proton-transporting ATP synthase complex, catalytic core F(1) [GO:0045261]	ATP binding [GO:0005524];ATPase activity [GO:0016887];copper ion binding [GO:0005507];proton-transporting ATP synthase activity, rotational mechanism [GO:0046933]	+	54	52	52	85.3	84.8	84.8	59.858	0	323.31	580990000000	1681	8384700000	9271100000	8368900000	8158500000	23711000000	23076000000	18382000000	22024000000	35626000000	33236000000	36379000000	35790000000	20386000000	23335000000	27374000000	25029000000	36913000000	24241000000	35831000000	33441000000	22814000000	23456000000	21793000000	23973000000	75.1	76	75
+	1.89322	1.66136	Q0WRW8	Q0WRW8	2076	At3g07570	Cytochrome b561 and DOMON domain-containing protein At3g07570	oxidation-reduction process [GO:0055114]	integral component of membrane [GO:0016021]	metal ion binding [GO:0046872]	+	2	2	2	7.9	7.9	7.9	40.444	0	19.472	668030000	22	63635000	71747000	59989000	62251000	66502000	95425000	42617000	43993000	3339000	0	0	0	12651000	34411000	28841000	19972000	16497000	0	27894000	0	0	18270000	0	0	7.9	7.9	7.9
+	1.85653	1.6552	Q05153	Q05153	2018	SSRP1	FACT complex subunit SSRP1	DNA repair [GO:0006281];DNA replication [GO:0006260];karyogamy [GO:0000741];polar nucleus fusion [GO:0010197];vegetative to reproductive phase transition of meristem [GO:0010228]	FACT complex [GO:0035101];nuclear chromatin [GO:0000790];nuclear euchromatin [GO:0005719];nucleus [GO:0005634]	DNA binding [GO:0003677];DNA-binding transcription factor activity [GO:0003700];histone binding [GO:0042393];nucleosome binding [GO:0031491]	+	17	17	17	30.3	30.3	30.3	71.645	0	48.165	3317100000	46	459980000	361290000	302710000	322260000	313610000	489250000	430690000	477380000	0	17939000	0	31148000	0	19990000	16724000	39922000	0	12471000	0	0	684660	848420	1125300	19064000	28.9	17.3	15.9
+	2.01201	1.65472	Q8W4D6	Q8W4D6	3233	HCF173	Protein HIGH CHLOROPHYLL FLUORESCENCE PHENOTYPE 173, chloroplastic	photosystem II assembly [GO:0010207];translational initiation [GO:0006413]	chloroplast [GO:0009507];chloroplast envelope [GO:0009941];chloroplast membrane [GO:0031969];chloroplast stroma [GO:0009570];chloroplast thylakoid membrane [GO:0009535];photosystem II [GO:0009523];thylakoid membrane [GO:0042651]		+	26	26	26	43	43	43	65.708	0	164.71	13511000000	214	9839300	13857000	13993000	7893800	13211000	4646800	13644000	12452000	1044800000	810070000	1018400000	927520000	692830000	713070000	905680000	819620000	1069500000	788440000	1020200000	984300000	778940000	650980000	683060000	513950000	2	4.7	4.7
+	1.67435	1.65384	A0A1P8ARN1	A0A1P8ARN1	112	At1g60200	Splicing factor PWI domain-containing protein / RNA recognition motif (RRM)-containing protein	mRNA processing [GO:0006397]		RNA binding [GO:0003723]	+	12	12	12	16.4	16.4	16.4	85.987	0	116.34	1006400000	39	93792000	96152000	79141000	97422000	161820000	157600000	147000000	153260000	0	0	1613000	0	0	0	14584000	0	0	1281000	0	0	359420	671410	633580	1021400	14.1	7.9	10.7
+	1.56416	1.65374	Q9M0F4	Q9M0F4	4944	At4g29270	Acid phosphatase-like protein			acid phosphatase activity [GO:0003993]	+	23	23	22	77	77	77	28.746	0	213.36	13979000000	112	1031400000	1423300000	828770000	975810000	1686200000	2062300000	2178900000	1887100000	304340000	301450000	219440000	79233000	158220000	199070000	23108000	175460000	215870000	20915000	23207000	36369000	21646000	28973000	39280000	58181000	60.2	70.3	53.5
+	3.05406	1.65315	P0DH99;Q6NLF6	P0DH99	1618	A1	Elongation factor 1-alpha 1	translation [GO:0006412];translational elongation [GO:0006414]	mitochondrion [GO:0005739];plasma membrane [GO:0005886];plasmodesma [GO:0009506]	GTP binding [GO:0005525];GTPase activity [GO:0003924];translation elongation factor activity [GO:0003746]	+	73	73	73	86.4	86.4	86.4	49.502	0	323.31	1672400000000	3511	72609000000	80236000000	70806000000	66136000000	105170000000	108790000000	98487000000	107750000000	61678000000	52986000000	59911000000	55188000000	48943000000	57678000000	59584000000	58083000000	66892000000	49110000000	70845000000	65007000000	69219000000	62791000000	64463000000	60060000000	84.2	83.1	79.7
+	1.6553	1.64517	Q9LJD8	Q9LJD8	4505	M3KE1	MAP3K epsilon protein kinase 1	activation of protein kinase activity [GO:0032147];cell cycle [GO:0007049];cell division [GO:0051301];protein autophosphorylation [GO:0046777];regulation of cell division [GO:0051302];regulation of embryonic development [GO:0045995];regulation of extent of cell growth [GO:0061387];regulation of mitotic cell cycle [GO:0007346];regulation of unidimensional cell growth [GO:0051510];signal transducti…	cytoplasm [GO:0005737];cytoskeleton [GO:0005856];cytosol [GO:0005829];nucleolus [GO:0005730];plasma membrane [GO:0005886]	ATP binding [GO:0005524];protein serine/threonine kinase activity [GO:0004674]	+	8	8	8	6.8	6.8	6.8	151.17	0	9.6872	971170000	13	66480000	50234000	37561000	45359000	70983000	92296000	72953000	79001000	50727000	36622000	29971000	37489000	51828000	58301000	54776000	51278000	0	13640000	0	0	0	0	0	71677000	5	5	3.2
+	4.39858	1.64463	O04450	O04450	1103	CCT5	T-complex protein 1 subunit epsilon	protein folding [GO:0006457]	chaperonin-containing T-complex [GO:0005832];cytosol [GO:0005829];nucleus [GO:0005634];plasma membrane [GO:0005886];plasmodesma [GO:0009506]	ATP binding [GO:0005524];unfolded protein binding [GO:0051082]	+	60	60	60	88	88	88	59.384	0	323.31	53403000000	473	3516700000	4658600000	3003800000	3513900000	7174500000	7228900000	6991500000	6330200000	772790000	653550000	720410000	575900000	649910000	738280000	646600000	624440000	966350000	512590000	916580000	809830000	717320000	544020000	627430000	508430000	74.8	85	70.1
+	1.20123	1.643	Q9AST8	Q9AST8	3628	ROSY1	MD-2-related lipid-recognition protein ROSY1	intracellular sterol transport [GO:0032366];positive gravitropism [GO:0009958];response to salt stress [GO:0009651];sterol transport [GO:0015918]	cytoplasm [GO:0005737]	phosphatidylethanolamine binding [GO:0008429];sterol binding [GO:0032934]	+	9	9	9	45.6	45.6	45.6	17.228	0	100.01	6248300000	55	238770000	283070000	272450000	229210000	1012400000	1198700000	1215900000	1298300000	28671000	24077000	26182000	22253000	61455000	44912000	55086000	51788000	3495200	2473700	40895000	33927000	4605400	14685000	4348800	80712000	38.8	38.8	38.8
+	3.54002	1.64285	Q9C8P0;REV__Q9M209	Q9C8P0	3775	EMB3003	Dihydrolipoyllysine-residue acetyltransferase component 5 of pyruvate dehydrogenase complex, chloroplastic	glycolytic process [GO:0006096]	chloroplast [GO:0009507];chloroplast envelope [GO:0009941];chloroplast stroma [GO:0009570];chloroplast thylakoid [GO:0009534];cytosolic ribosome [GO:0022626];nucleus [GO:0005634];plasma membrane [GO:0005886]	dihydrolipoyllysine-residue acetyltransferase activity [GO:0004742];protein domain specific binding [GO:0019904]	+	45	45	41	57.4	57.4	57	48.306	0	323.31	51533000000	526	3731100000	4887500000	3349600000	3361200000	5398400000	5745700000	5275200000	5633000000	803040000	689570000	1066900000	881120000	505480000	721130000	917600000	989490000	912590000	693380000	1061800000	1117200000	714040000	906040000	1012400000	1159500000	56.8	57	57.4
+	1.79	1.63817	Q9LVY0	Q9LVY0	4805	PRFB1	Peptide chain release factor PrfB1, chloroplastic	plastid organization [GO:0009657];RNA processing [GO:0006396];translational termination [GO:0006415]	chloroplast [GO:0009507];chloroplast stroma [GO:0009570]	translation release factor activity, codon specific [GO:0016149]	+	16	16	16	34.6	34.6	34.6	50.976	0	65.617	5593000000	107	33985000	87483000	32160000	51275000	27869000	60889000	56057000	47522000	276040000	330980000	358320000	305920000	226580000	300410000	293670000	305320000	473600000	272190000	456350000	440310000	302420000	253610000	288100000	311940000	3.1	4.8	3.1
+	3.5552	1.633	Q9LK72	Q9LK72	4536	At3g16530	Lectin-like protein At3g16530	response to chitin [GO:0010200];response to oomycetes [GO:0002239]	apoplast [GO:0048046];cell wall [GO:0005618];cytosol [GO:0005829];nucleus [GO:0005634]	carbohydrate binding [GO:0030246]	+	28	28	21	72.5	72.5	54	30.509	0	323.31	243740000000	754	40307000	29829000	26065000	30507000	608840000	686120000	455380000	580400000	15269000000	13769000000	15385000000	12903000000	15313000000	16331000000	16940000000	16987000000	14183000000	11502000000	14572000000	15118000000	17091000000	15738000000	16134000000	14044000000	6.9	5.1	10.9
+	4.81506	1.63247	Q9FUP0	Q9FUP0	4259	OPR3	12-oxophytodienoate reductase 3	jasmonic acid biosynthetic process [GO:0009695];oxylipin biosynthetic process [GO:0031408];response to fungus [GO:0009620];response to ozone [GO:0010193];stamen development [GO:0048443]	peroxisome [GO:0005777]	12-oxophytodienoate reductase activity [GO:0016629];FMN binding [GO:0010181];oxidoreductase activity [GO:0016491]	+	31	31	31	87	87	87	42.691	0	323.31	58382000000	501	755130000	1190900000	625020000	712950000	1047800000	1009300000	1017800000	901190000	4043500000	3716000000	3966000000	3504300000	2294500000	2979700000	3264800000	3025000000	3187300000	2121200000	3128100000	3194100000	3479100000	2831900000	3262700000	3123400000	59.1	61.1	52.9
+	3.16332	1.63223	Q94BV5	Q94BV5	3513	At1g62600	Flavin-containing monooxygenase FMO GS-OX-like 4		vacuole [GO:0005773]	flavin adenine dinucleotide binding [GO:0050660];N,N-dimethylaniline monooxygenase activity [GO:0004499];NADP binding [GO:0050661]	+	14	12	12	37.2	34.7	34.7	51.311	0	26.02	4617300000	117	190900000	180090000	129350000	171070000	188440000	174140000	163020000	110180000	144930000	177860000	191330000	324360000	159630000	146310000	309920000	207160000	186050000	171120000	180410000	237400000	163040000	285370000	195270000	230010000	32.5	26.1	23.5
+	2.36193	1.63175	O81865	O81865	1547	PP2A1	Protein PHLOEM PROTEIN 2-LIKE A1	response to insect [GO:0009625]		carbohydrate binding [GO:0030246];proteoglycan binding [GO:0043394]	+	5	5	5	24	24	24	28.101	0	47.59	680960000	34	24598000	24793000	8133300	16171000	24493000	9205400	24511000	10227000	65900000	43210000	85997000	80888000	7416800	57122000	11253000	29210000	7861500	17461000	10274000	23951000	29220000	22038000	20446000	26584000	12.6	12.6	5.3
+	1.39208	1.62799	A0A1P8AX61	A0A1P8AX61	166	At2g01755	Uncharacterized protein		chloroplast [GO:0009507]		+	6	6	6	27.9	27.9	27.9	20.405	0	23.932	2514600000	39	0	0	0	0	0	0	0	0	185780000	169880000	236910000	217360000	142530000	154750000	133250000	147750000	152880000	108020000	158050000	160600000	163890000	130510000	131160000	121240000	0	0	0
+	2.92234	1.62784	Q8LPR9	Q8LPR9	2965	TIC110	Protein TIC110, chloroplastic	chloroplast organization [GO:0009658];protein import into chloroplast stroma [GO:0045037]	chloroplast [GO:0009507];chloroplast envelope [GO:0009941];extracellular region [GO:0005576];integral component of membrane [GO:0016021];plastid [GO:0009536];Tic complex [GO:0031897];TOC-TIC supercomplex I [GO:0061927]		+	18	18	18	20	20	20	112.12	0	37.104	2468100000	57	431830000	0	282710000	11211000	0	10320000	0	10316000	180410000	119920000	228780000	151430000	82327000	103410000	77131000	76036000	139520000	95095000	168720000	114050000	52266000	38560000	44803000	49238000	0.9	0	2.2
+	1.41856	1.61737	Q9SI20	Q9SI20	5346	At2g18110	Elongation factor 1-delta 2	translational elongation [GO:0006414]	cytosol [GO:0005829];eukaryotic translation elongation factor 1 complex [GO:0005853];mitochondrion [GO:0005739]	guanyl-nucleotide exchange factor activity [GO:0005085];translation elongation factor activity [GO:0003746]	+	27	17	17	74.5	70.1	70.1	25.266	0	225.67	13047000000	191	699710000	555400000	431710000	582910000	821930000	1039800000	1089500000	1425700000	522070000	414930000	415270000	492080000	198070000	594760000	410370000	361630000	489080000	371170000	401370000	385750000	376320000	210350000	408620000	348420000	74	60.2	59.7
+	1.91094	1.61616	Q9LTX7_ARATHGb	Q9LTX7_ARATHGb	4727						+	22	22	22	22.6	22.6	22.6	121.43	0	38.409	3282400000	73	231770000	261690000	191410000	175610000	315300000	243550000	272430000	312240000	87971000	49110000	68135000	68709000	62078000	82960000	106470000	46751000	61360000	20978000	122730000	92157000	90439000	112700000	108680000	97161000	16.8	17.6	15.1
+	4.04967	1.61525	Q9SKZ1	Q9SKZ1	5455	PURA1	Transcription factor Pur-alpha 1	response to cadmium ion [GO:0046686]	cytoplasm [GO:0005737];nucleus [GO:0005634];peroxisome [GO:0005777]	DNA-binding transcription repressor activity, RNA polymerase II-specific [GO:0001227];double-stranded DNA binding [GO:0003690];mRNA binding [GO:0003729];purine-rich negative regulatory element binding [GO:0032422];RNA polymerase II transcription regulatory region sequence-specific DNA binding [GO:0000977];sequence-specific DNA binding [GO:0043565]	+	21	21	21	72.3	72.3	72.3	32.2	0	323.31	32792000000	390	1395700000	1326900000	1000700000	1067500000	1405300000	1530800000	1528800000	1420300000	1306400000	1268500000	1363200000	1274200000	1144600000	1492600000	1351300000	1589800000	1522800000	1024700000	1531200000	1536200000	1411600000	1317700000	1453800000	1527600000	69.9	72	67.9
+	2.98844	1.60843	Q93VR3	Q93VR3	3282	At5g28840	GDP-mannose 3,5-epimerase	L-ascorbic acid biosynthetic process [GO:0019853]	cytosol [GO:0005829];plastid [GO:0009536]	GDP-mannose 3,5-epimerase activity [GO:0047918];NAD binding [GO:0051287]	+	53	53	53	77.7	77.7	77.7	42.758	0	323.31	138120000000	882	2034300000	2516100000	1623000000	1769700000	2532800000	2577900000	2511600000	2453100000	7451700000	6542700000	7883000000	6689600000	5497500000	7266800000	7213300000	7848400000	8700500000	5274200000	9046700000	9458600000	7913200000	7023500000	7770700000	8525700000	72.9	69.2	69.5
+	2.92335	1.60502	F4HR91	F4HR91	533	At1g33610	Leucine-rich repeat (LRR) family protein				+	23	21	21	45	42.7	42.7	52.666	0	160.2	10718000000	179	8773300	0	0	42654000	0	0	5994100	0	994160000	916320000	943170000	845780000	551150000	730890000	634830000	784140000	627520000	515070000	571060000	551750000	493230000	461070000	515500000	525160000	2.5	0	0
+	4.85507	1.60073	Q94AQ8	Q94AQ8	3483	PNSB2	Photosynthetic NDH subunit of subcomplex B 2, chloroplastic	carbohydrate metabolic process [GO:0005975];photosynthetic electron transport in photosystem I [GO:0009773]	chloroplast thylakoid [GO:0009534];chloroplast thylakoid membrane [GO:0009535];cytoplasm [GO:0005737];NAD(P)H dehydrogenase complex (plastoquinone) [GO:0010598]	carbohydrate binding [GO:0030246];glucose-6-phosphate 1-epimerase activity [GO:0047938]	+	16	16	16	50.3	50.3	50.3	38.005	0	182.3	12814000000	141	109990000	176670000	155070000	138850000	172600000	288650000	228950000	235590000	627210000	567390000	617930000	498440000	506920000	625420000	551220000	701510000	1259400000	851530000	1152100000	1066800000	646620000	561270000	657110000	416380000	4.9	4.9	4.9
+	2.49757	1.5925	Q9FG81	Q9FG81	3935	MQD19.19	Aluminum induced protein with YGL and LRDR motifs		cytosol [GO:0005829];nucleus [GO:0005634];plastid [GO:0009536]		+	26	26	25	92	92	92	27.509	0	323.31	104560000000	637	5656900000	5075700000	4138600000	4001500000	7411000000	6564600000	6736000000	7247200000	4418700000	4360200000	5214500000	3823800000	2981800000	3898200000	2769300000	3384200000	4200600000	2882100000	3677400000	3564400000	3367600000	2684900000	3429700000	3075100000	77.7	68.5	77.7
+	1.90572	1.59143	O81888	O81888	1549	T16L1.210	AT4g33720		extracellular space [GO:0005615]		+	4	3	3	17.8	13.5	13.5	18.491	0	3.6762	404440000	5	123270000	62903000	51990000	56489000	15653000	0	54130000	16929000	4828400	5135500	0	8286300	4826600	0	0	0	0	0	0	0	0	0	0	0	13.5	12.3	12.3
+	3.46068	1.59096	Q9M2E0	Q9M2E0	5004	RH12	DEAD-box ATP-dependent RNA helicase 12	cytoplasmic mRNA processing body assembly [GO:0033962];mRNA processing [GO:0006397];mRNA transport [GO:0051028];regulation of translation [GO:0006417];stress granule assembly [GO:0034063]	cytoplasmic stress granule [GO:0010494];P-body [GO:0000932]	ATP binding [GO:0005524];mRNA binding [GO:0003729];RNA binding [GO:0003723];RNA helicase activity [GO:0003724]	+	21	21	6	41	41	17.3	56.774	0	146.41	14275000000	264	347370000	411170000	324940000	359820000	854900000	688120000	551950000	682760000	668290000	661390000	961920000	992770000	512120000	390180000	525420000	441780000	640920000	600200000	781080000	693610000	555380000	530080000	556920000	541700000	26.9	22.5	28.5
+	1.45082	1.58953	Q9SB48	Q9SB48	5220	ATR1	NADPH--cytochrome P450 reductase 1	phenylpropanoid metabolic process [GO:0009698];response to abscisic acid [GO:0009737];response to oxidative stress [GO:0006979]	cytosol [GO:0005829];endoplasmic reticulum [GO:0005783];endoplasmic reticulum membrane [GO:0005789];integral component of membrane [GO:0016021]	flavin adenine dinucleotide binding [GO:0050660];FMN binding [GO:0010181];NADP binding [GO:0050661];NADPH-hemoprotein reductase activity [GO:0003958];oxidoreductase activity [GO:0016491];oxidoreductase activity, acting on paired donors, with incorporation or reduction of molecular oxygen, NAD(P)H as one donor, and incorporation of one atom of oxygen [GO:0016709]	+	13	12	12	23.4	22.5	22.5	76.765	0	23.228	1667500000	22	282670000	269480000	185090000	170920000	223040000	160250000	167330000	157570000	6482500	0	0	0	12226000	6061800	9797100	9127300	0	0	0	0	3517100	0	0	3985500	14.5	16.9	16.2
+	2.20512	1.58196	Q9SX22	Q9SX22	5710	At1g68590	30S ribosomal protein 3-1, chloroplastic	plastid translation [GO:0032544]	chloroplast [GO:0009507];chloroplast stroma [GO:0009570];chloroplast thylakoid membrane [GO:0009535];mitochondrion [GO:0005739];ribosome [GO:0005840];thylakoid [GO:0009579]	structural constituent of ribosome [GO:0003735]	+	14	14	14	54.8	54.8	54.8	18.472	0	31.034	8006000000	138	5480300	0	0	0	0	10534000	12390000	0	695510000	685520000	675950000	524040000	283000000	469780000	416500000	477690000	693670000	385740000	695870000	660910000	355420000	286630000	397100000	274300000	4.2	0	0
+	1.2753	1.58014	P54888	P54888	1896	P5CSB	Delta-1-pyrroline-5-carboxylate synthase B	embryo development ending in seed dormancy [GO:0009793];L-proline biosynthetic process [GO:0055129];pollen development [GO:0009555];proline biosynthetic process [GO:0006561]	chloroplast [GO:0009507];cytoplasm [GO:0005737];cytosol [GO:0005829];plasmodesma [GO:0009506]	ATP binding [GO:0005524];glutamate 5-kinase activity [GO:0004349];glutamate-5-semialdehyde dehydrogenase activity [GO:0004350]	+	51	51	28	58.3	58.3	34.6	78.87	0	323.31	25930000000	242	2158500000	2452300000	2032000000	1801100000	3919900000	3637000000	3698400000	4199100000	226200000	88120000	240940000	53530000	235760000	224700000	188940000	60550000	48442000	187530000	58918000	82032000	72089000	83008000	73904000	107420000	48.8	52.1	51.2
+	3.89997	1.57975	Q9LZ82	Q9LZ82	4892	BTR1	Protein BTR1	regulation by virus of viral protein levels in host cell [GO:0046719];regulation of gene expression [GO:0010468];RNA splicing [GO:0008380]	cytoplasm [GO:0005737];cytosol [GO:0005829];plasma membrane [GO:0005886]	mRNA binding [GO:0003729]	+	39	39	39	84.3	84.3	84.3	33.82	0	323.31	119920000000	894	4464400000	5055400000	4209200000	4374600000	6215000000	5442800000	5444300000	5708500000	6182200000	5607500000	6423400000	6395900000	3529700000	4612300000	4665500000	5050500000	5619700000	3824300000	5750600000	5505600000	4218000000	3843000000	3908400000	3871000000	79.2	80.8	82.7
+	1.16748	1.57802	F4HRT5	F4HRT5	538	CRWN1	Protein CROWDED NUCLEI 1	nucleus organization [GO:0006997];regulation of nucleus size [GO:0097298]	cytoplasmic chromatin [GO:0000789];cytosol [GO:0005829];mitochondrion [GO:0005739];nuclear envelope [GO:0005635];nuclear lamina [GO:0005652];nuclear membrane [GO:0031965];nuclear periphery [GO:0034399];nucleoplasm [GO:0005654];nucleus [GO:0005634]		+	30	30	30	26	26	26	129.09	0	110.28	10317000000	97	2025300000	2858000000	285590000	343060000	811890000	735220000	814440000	659250000	97335000	136980000	123360000	115620000	77416000	117670000	107440000	127060000	100640000	106520000	120000000	117250000	110380000	17834000	135460000	173060000	19.3	19.2	14.9
+	5.64425	1.57677	P11574	P11574	1634	VHA-B1	V-type proton ATPase subunit B1	actin filament bundle assembly [GO:0051017];actin filament capping [GO:0051693];ATP metabolic process [GO:0046034];glucose mediated signaling pathway [GO:0010255];negative regulation of actin filament depolymerization [GO:0030835];proton transmembrane transport [GO:1902600];regulation of transcription by RNA polymerase II [GO:0006357];response to cadmium ion [GO:0046686]	Golgi apparatus [GO:0005794];mitochondrion [GO:0005739];nucleus [GO:0005634];plasma membrane [GO:0005886];plasmodesma [GO:0009506];protein-containing complex [GO:0032991];proton-transporting V-type ATPase, V1 domain [GO:0033180];vacuolar membrane [GO:0005774];vacuole [GO:0005773]	actin filament binding [GO:0051015];ATP binding [GO:0005524];hydrolase activity [GO:0016787]	+	48	48	11	80.2	80.2	21.2	54.107	0	323.31	229840000000	1421	20667000000	20297000000	16630000000	15595000000	22708000000	21985000000	20617000000	22454000000	5618700000	5139600000	5908200000	5301400000	3408700000	3955200000	3855000000	3476800000	4955700000	4134100000	5694000000	5412200000	3414200000	2872700000	2840400000	2905700000	80	80.2	80.2
+	1.45363	1.57172	Q9C658	Q9C658	3701	DCP5	Protein decapping 5	cytoplasmic mRNA processing body assembly [GO:0033962];deadenylation-independent decapping of nuclear-transcribed mRNA [GO:0031087];mRNA processing [GO:0006397];negative regulation of translation [GO:0017148];positive regulation of cytoplasmic mRNA processing body assembly [GO:0010606];stress granule assembly [GO:0034063]	cytosol [GO:0005829];messenger ribonucleoprotein complex [GO:1990124];nucleus [GO:0005634];P-body [GO:0000932]	mRNA binding [GO:0003729];protein homodimerization activity [GO:0042803]	+	13	13	13	25	25	25	64.369	0	146.19	4279100000	95	405290000	374510000	213430000	273930000	532630000	518520000	531900000	629360000	72851000	78990000	57421000	44619000	38314000	56134000	45107000	27959000	65169000	71302000	55867000	52563000	56718000	22907000	36652000	16907000	22.9	25	15.1
+	1.21385	1.56591	Q9LII1	Q9LII1	4482	At3g18580	Nucleic acid-binding, OB-fold-like protein	mitochondrial DNA replication [GO:0006264];positive regulation of helicase activity [GO:0051096]	mitochondrial nucleoid [GO:0042645];mitochondrion [GO:0005739];nucleoid [GO:0009295]	single-stranded DNA binding [GO:0003697]	+	7	7	7	34.1	34.1	34.1	24.213	0	9.2006	968290000	21	85723000	65626000	43063000	76436000	95109000	135090000	122380000	134180000	2665400	16265000	7623200	11581000	17420000	11233000	14256000	28206000	5799800	18986000	9367000	24843000	20153000	4812400	17481000	0	19.8	19.8	13.8
+	2.04776	1.5604	P46077	P46077	1808	GRF4	14-3-3-like protein GF14 phi		cytoplasm [GO:0005737];nucleus [GO:0005634]		+	34	20	18	86.9	65.5	61.4	30.194	0	192.13	12740000000	170	889810000	973160000	611870000	609850000	1586500000	1373000000	1219500000	1418500000	305230000	258720000	256010000	181720000	246800000	282690000	162720000	377300000	305060000	218450000	276720000	373280000	249590000	116710000	256300000	190410000	82	86.1	82
+	3.61844	1.55214	Q9SAB3	Q9SAB3	5199	RBP45B	Polyadenylate-binding protein RBP45B	mRNA processing [GO:0006397];response to ozone [GO:0010193]	cytosol [GO:0005829];extracellular region [GO:0005576];nucleus [GO:0005634]	mRNA binding [GO:0003729];poly(A) binding [GO:0008143];RNA binding [GO:0003723]	+	26	26	26	50.6	50.6	50.6	44.114	0	300.65	59414000000	469	2809500000	2352400000	1573000000	2100400000	3248600000	3469600000	3146700000	3468700000	1969800000	1834500000	2221300000	1967000000	2147900000	2557900000	2295400000	2499100000	3126600000	2453800000	2822500000	2579800000	2034200000	2215500000	2215100000	2304900000	50.6	48.6	38.8
+	1.42408	1.55181	Q9LZ57	Q9LZ57	4889	RPL36C	60S ribosomal protein L36-3	cytoplasmic translation [GO:0002181]	cytosolic large ribosomal subunit [GO:0022625];plasma membrane [GO:0005886];plasmodesma [GO:0009506];vacuolar membrane [GO:0005774]	structural constituent of ribosome [GO:0003735]	+	14	14	7	57.4	57.4	30.6	12.189	0	98.816	22596000000	88	2116400000	2701700000	1858100000	2210500000	3170000000	3353600000	3251000000	3728700000	26446000	26827000	20935000	15192000	0	1635100	9965300	0	24012000	0	21579000	21485000	9357200	8601000	13217000	7146900	54.6	57.4	56.5
+	4.32642	1.5497	O23647	O23647	1244	SBE2.1	1,4-alpha-glucan-branching enzyme 2-1, chloroplastic/amyloplastic	amylopectin biosynthetic process [GO:0010021];carbohydrate metabolic process [GO:0005975];cellular response to fructose stimulus [GO:0071332];cellular response to glucose stimulus [GO:0071333];cellular response to light stimulus [GO:0071482];cellular response to sucrose stimulus [GO:0071329];glycogen biosynthetic process [GO:0005978];starch biosynthetic process [GO:0019252];starch metabolic proce…	amyloplast [GO:0009501];chloroplast [GO:0009507];chloroplast stroma [GO:0009570];cytoplasm [GO:0005737]	1,4-alpha-glucan branching enzyme activity (using a glucosylated glycogenin as primer for glycogen synthesis) [GO:0102752];1,4-alpha-glucan branching enzyme activity [GO:0003844];cation binding [GO:0043169];hydrolase activity, hydrolyzing O-glycosyl compounds [GO:0004553]	+	28	28	23	36.6	36.6	30.2	97.659	0	127.52	8381400000	219	187200000	252510000	162990000	183530000	342820000	403070000	258220000	293870000	347810000	340130000	347070000	274840000	427240000	533470000	557610000	604600000	272000000	165270000	297140000	357370000	489100000	412120000	430910000	440480000	19.8	21.3	20.3
+	1.14887	1.54251	O80699	O80699	1468	TULP4	Putative Tubby-like protein 4	regulation of transcription, DNA-templated [GO:0006355]		DNA-binding transcription factor activity [GO:0003700]	+	2	2	2	10.9	10.9	10.9	30.184	1	-2	223430000	1	0	0	0	0	0	0	0	0	7904300	16483000	11675000	12850000	12734000	16831000	15581000	19665000	11640000	12310000	17446000	15255000	9807200	10619000	13641000	18984000	0	0	0
+	4.15558	1.5397	Q9LKA5;Q58G44	Q9LKA5;Q58G44	4544	MORF8;At1g53260	Multiple organellar RNA editing factor 8, chloroplastic/mitochondrial;Uncharacterized protein	cytidine to uridine editing [GO:0016554];mitochondrial mRNA modification [GO:0080156];mRNA processing [GO:0006397];RNA modification [GO:0009451]	chloroplast [GO:0009507];cytosol [GO:0005829];mitochondrion [GO:0005739];nucleus [GO:0005634]	cobalt ion binding [GO:0050897];protein dimerization activity [GO:0046983];protein homodimerization activity [GO:0042803]	+	14	14	14	21.3	21.3	21.3	42.869	0	66.736	11977000000	89	984010000	1079300000	756440000	816890000	1313200000	1229200000	1533900000	1524900000	320820000	261580000	154650000	150430000	73258000	87895000	117600000	140040000	376680000	154900000	376690000	179570000	95759000	104390000	91071000	53787000	19.2	21.3	19.2
+	1.83835	1.53904	A0A1P8B4E4	A0A1P8B4E4	224	At4g30990	ARM repeat superfamily protein		90S preribosome [GO:0030686];nucleolus [GO:0005730];small-subunit processome [GO:0032040]		+	7	7	7	3	3	3	297.52	0.0057627	1.7656	944090000	14	4858100	5387800	3859600	7091800	46199000	42311000	24402000	43395000	77784000	60967000	87615000	22737000	50718000	66953000	39182000	39958000	88895000	27735000	60562000	29153000	27285000	23891000	29735000	33418000	0.4	0.4	0.4
+	1.21699	1.53498	Q9SZA3	Q9SZA3	5765	TIF3K1	Eukaryotic translation initiation factor 3 subunit K	formation of cytoplasmic translation initiation complex [GO:0001732];regulation of translational initiation [GO:0006446]	cytosol [GO:0005829];eukaryotic 43S preinitiation complex [GO:0016282];eukaryotic 48S preinitiation complex [GO:0033290];eukaryotic translation initiation factor 3 complex [GO:0005852];plasma membrane [GO:0005886]	ribosome binding [GO:0043022];translation initiation factor activity [GO:0003743]	+	18	18	18	61.5	61.5	61.5	25.728	0	149.91	8585000000	83	881140000	943790000	658370000	707630000	1157100000	1413900000	1156400000	1157100000	17756000	48508000	22042000	41917000	19912000	39733000	29681000	41888000	27773000	38922000	31743000	61137000	29841000	6008900	41785000	10921000	60.6	61.1	57.5
+	1.20385	1.53226	Q681Q7	Q681Q7	2425	At1g03900	Uncharacterized protein At1g03900	endocytosis [GO:0006897];vesicle-mediated transport [GO:0016192]	clathrin vesicle coat [GO:0030125]	ATPase-coupled transmembrane transporter activity [GO:0042626]	+	11	11	11	51.5	51.5	51.5	29.795	0	118.97	6710800000	124	403010000	396790000	257290000	303290000	348480000	441770000	445540000	501810000	232670000	231960000	251690000	270090000	188760000	203770000	165210000	209570000	265080000	191640000	265840000	236590000	215220000	229160000	219410000	236110000	47.1	44.5	35.3
+	2.06626	1.53016	Q8L860	Q8L860	2828	TOL9	TOM1-like protein 9	intracellular protein transport [GO:0006886]	cytoplasm [GO:0005737];membrane [GO:0016020]		+	13	13	13	26.7	26.7	26.7	72.963	0	142.33	11518000000	147	509110000	529620000	431060000	414200000	545210000	675780000	680260000	577850000	458110000	418040000	424660000	389180000	381800000	422560000	470280000	490290000	603190000	388030000	546700000	429320000	470580000	396730000	458300000	406700000	20	22.5	18.2
+	2.25372	1.52228	Q42479	Q42479	2272	CPK3	Calcium-dependent protein kinase 3	abscisic acid-activated signaling pathway [GO:0009738];intracellular signal transduction [GO:0035556];peptidyl-serine phosphorylation [GO:0018105];protein autophosphorylation [GO:0046777];regulation of anion channel activity [GO:0010359];regulation of stomatal movement [GO:0010119];response to salt stress [GO:0009651]	cytoplasm [GO:0005737];cytosol [GO:0005829];membrane [GO:0016020];nucleus [GO:0005634];plasma membrane [GO:0005886];vacuole [GO:0005773]	ATP binding [GO:0005524];calcium ion binding [GO:0005509];calcium-dependent protein serine/threonine kinase activity [GO:0009931];calmodulin binding [GO:0005516];protein kinase activity [GO:0004672];protein serine/threonine kinase activity [GO:0004674]	+	33	33	33	59.2	59.2	59.2	59.336	0	210.96	15669000000	252	1685700000	1734300000	1349500000	1467900000	1225600000	1488500000	938570000	1075200000	183340000	217690000	644000000	711190000	178130000	226160000	167860000	228770000	368950000	230280000	562660000	417720000	101010000	160980000	141680000	163640000	54.6	48.4	47.1
+	4.97728	1.51593	Q9LVT8	Q9LVT8	4800	RGGC	RGG repeats nuclear RNA binding protein C		cytoplasm [GO:0005737];nucleus [GO:0005634];perinuclear region of cytoplasm [GO:0048471];plasma membrane [GO:0005886];plastid [GO:0009536]	mRNA binding [GO:0003729];RNA binding [GO:0003723]	+	15	15	9	42	42	33.1	37.999	0	68.373	6993100000	133	381380000	546470000	424660000	504620000	730230000	898850000	618480000	812730000	339950000	306650000	347500000	339490000	79841000	34011000	49688000	55797000	170410000	84201000	98596000	129750000	10741000	5805300	9047800	14198000	35.9	38.1	37.3
+	1.89766	1.51356	O65719	O65719	1425	HSP70-3	Heat shock 70 kDa protein 3	cellular response to unfolded protein [GO:0034620];chaperone cofactor-dependent protein refolding [GO:0051085];protein refolding [GO:0042026];response to cadmium ion [GO:0046686];response to heat [GO:0009408];response to karrikin [GO:0080167];response to unfolded protein [GO:0006986];response to virus [GO:0009615]	apoplast [GO:0048046];cell wall [GO:0005618];chloroplast [GO:0009507];cytoplasm [GO:0005737];cytosol [GO:0005829];cytosolic ribosome [GO:0022626];Golgi apparatus [GO:0005794];nuclear matrix [GO:0016363];plasma membrane [GO:0005886];plasmodesma [GO:0009506];vacuolar membrane [GO:0005774];vacuole [GO:0005773]	ATP binding [GO:0005524];ATPase activity [GO:0016887];heat shock protein binding [GO:0031072];misfolded protein binding [GO:0051787];protease binding [GO:0002020];protein folding chaperone [GO:0044183];unfolded protein binding [GO:0051082]	+	85	41	40	82.1	41.4	40.4	71.147	0	323.31	426670000000	1322	18514000000	21278000000	17064000000	16817000000	16748000000	17913000000	16917000000	18905000000	17982000000	17067000000	19555000000	18166000000	12812000000	16579000000	16952000000	17036000000	18549000000	12962000000	19363000000	19738000000	20668000000	19181000000	17002000000	18905000000	77.3	81.8	82.1
+	3.02972	1.50964	Q9SDS7	Q9SDS7	5263	VHA-C	V-type proton ATPase subunit C	unidimensional cell growth [GO:0009826]	chloroplast [GO:0009507];extracellular region [GO:0005576];Golgi apparatus [GO:0005794];plant-type vacuole [GO:0000325];plasma membrane [GO:0005886];vacuolar membrane [GO:0005774];vacuolar proton-transporting V-type ATPase, V1 domain [GO:0000221];vacuole [GO:0005773]	proton-exporting ATPase activity, phosphorylative mechanism [GO:0008553];proton-transporting ATPase activity, rotational mechanism [GO:0046961]	+	36	36	36	79.2	79.2	79.2	42.619	0	323.31	96513000000	611	5192700000	6028300000	3778200000	4654300000	6166800000	7262200000	7304200000	7170700000	2742000000	2447100000	3236500000	3192200000	2137600000	2899800000	2758100000	2653000000	3468100000	3309200000	4483000000	4106100000	2681100000	3000000000	2495400000	3347000000	71.2	77.1	71.7
+	2.88645	1.50713	Q8RWV0	Q8RWV0	3007	TKL-1	Transketolase-1, chloroplastic	pentose-phosphate shunt [GO:0006098];reductive pentose-phosphate cycle [GO:0019253];response to cadmium ion [GO:0046686]	chloroplast [GO:0009507];chloroplast envelope [GO:0009941];chloroplast stroma [GO:0009570];cytosol [GO:0005829];plastid [GO:0009536]	metal ion binding [GO:0046872];transketolase activity [GO:0004802]	+	87	87	66	83.3	83.3	81.8	79.967	0	323.31	2115100000000	4704	25227000000	25989000000	20701000000	19235000000	28977000000	24071000000	29857000000	28585000000	118180000000	104610000000	116670000000	108610000000	104130000000	110520000000	115280000000	114500000000	135690000000	102160000000	141810000000	137500000000	133980000000	113120000000	125300000000	130370000000	78.4	78.4	81.9
+	1.7533	1.5048	Q9LT92	Q9LT92	4706	MJM18.3	2-oxoglutarate (2OG) and Fe(II)-dependent oxygenase superfamily protein	peptidyl-proline hydroxylation to 4-hydroxy-L-proline [GO:0018401]	endoplasmic reticulum [GO:0005783]	iron ion binding [GO:0005506];L-ascorbic acid binding [GO:0031418];oxidoreductase activity, acting on paired donors, with incorporation or reduction of molecular oxygen [GO:0016705]	+	7	7	7	30.8	30.8	30.8	27.762	0	14.498	2156000000	68	118460000	138100000	77416000	84461000	46284000	72205000	105860000	89333000	103600000	101720000	82405000	52008000	69102000	101890000	67226000	74366000	105570000	78401000	129420000	96506000	107440000	72855000	85477000	95879000	14.8	14.8	27.2
+	1.71925	1.50079	Q6NLQ7	Q6NLQ7	2449	RIBA2	Monofunctional riboflavin biosynthesis protein RIBA 2, chloroplastic	riboflavin biosynthetic process [GO:0009231]	chloroplast [GO:0009507];cytoplasm [GO:0005737]	3,4-dihydroxy-2-butanone-4-phosphate synthase activity [GO:0008686];GTP binding [GO:0005525];metal ion binding [GO:0046872]	+	14	12	12	32.4	28.2	28.2	52.199	0	82.978	4828800000	111	112390000	184230000	141590000	132490000	162420000	194030000	156060000	179390000	288620000	173100000	167440000	210670000	133030000	155780000	285060000	231880000	265020000	213240000	255840000	286430000	238210000	246110000	210930000	204850000	18.1	21.4	17.6
+	1.73616	1.49254	Q8H0S3	Q8H0S3	2699	At1g05520	Protein transport protein SEC23	COPII-coated vesicle cargo loading [GO:0090110];intracellular protein transport [GO:0006886]	COPII vesicle coat [GO:0030127];cytosol [GO:0005829];endoplasmic reticulum exit site [GO:0070971];endoplasmic reticulum membrane [GO:0005789];extracellular region [GO:0005576];Golgi membrane [GO:0000139]	GTPase activator activity [GO:0005096];zinc ion binding [GO:0008270]	+	33	31	28	44.4	42.9	39.1	86.356	0	323.31	16216000000	251	1289900000	1541400000	1220900000	1184000000	1669800000	1752900000	1557100000	1709300000	252400000	229910000	309410000	234990000	294800000	194140000	280430000	339970000	241430000	183780000	231440000	328740000	306220000	223290000	345910000	294250000	38.6	43.6	40.7
+	1.30314	1.48974	Q9FVR1	Q9FVR1	4276	At1g32160	At1g32160/F3C3_6		chloroplast [GO:0009507];chloroplast stroma [GO:0009570]		+	5	5	5	17.7	17.7	17.7	45.867	0	30.346	1384400000	27	17298000	21584000	0	4995400	19666000	7881000	20662000	20711000	82404000	79780000	99514000	96806000	72470000	70760000	65952000	81154000	73331000	29430000	71532000	39710000	37284000	96633000	67680000	207130000	3.2	5.7	0
+	1.36026	1.48285	P43082	P43082	1793	HEL	Hevein-like preproprotein	defense response to bacterium [GO:0042742];defense response to fungus, incompatible interaction [GO:0009817];killing of cells of other organism [GO:0031640];response to ethylene [GO:0009723];response to herbivore [GO:0080027];response to virus [GO:0009615];systemic acquired resistance [GO:0009627]	secretory vesicle [GO:0099503];vacuole [GO:0005773]	chitin binding [GO:0008061];ribonuclease activity [GO:0004540]	+	7	7	7	31.6	31.6	31.6	22.936	0	64.304	4645500000	97	76195000	88686000	34387000	25047000	167380000	66477000	110240000	113980000	366490000	179350000	270700000	243890000	295710000	243430000	227910000	192030000	379250000	281530000	256990000	249190000	277220000	234520000	162320000	102630000	19.3	25.5	15.6
+	3.5397	1.48171	Q93ZS6	Q93ZS6	3371	LRS1	AT3g05090/T12H1_5	lateral root formation [GO:0010311];positive regulation of protein deubiquitination [GO:1903003]	Cul4-RING E3 ubiquitin ligase complex [GO:0080008];cytosol [GO:0005829]	ubiquitin binding [GO:0043130]	+	18	18	18	29.7	29.7	29.7	82.196	0	69.686	6456100000	140	305000000	266640000	178980000	257940000	213240000	296180000	303540000	294640000	236350000	236850000	269820000	224700000	220870000	424330000	244610000	218600000	213120000	215070000	342940000	307140000	289630000	323090000	257700000	315150000	24.8	20.1	12.1
+	2.73615	1.4798	Q39192	Q39192	2206	SRK2D	Serine/threonine-protein kinase SRK2D	abscisic acid-activated signaling pathway [GO:0009738];intracellular signal transduction [GO:0035556];protein phosphorylation [GO:0006468]	cytoplasm [GO:0005737];nucleus [GO:0005634]	ATP binding [GO:0005524];protein serine/threonine kinase activity [GO:0004674]	+	11	7	3	28.7	21.5	11.9	41.206	0	18.125	2786300000	46	363780000	263870000	231180000	195390000	244660000	225530000	258980000	205850000	82376000	36231000	78463000	28966000	73273000	72062000	57633000	54406000	54109000	41734000	46478000	11464000	51243000	39887000	41086000	27614000	26	25.7	28.7
+	3.18798	1.47873	Q29Q26	Q29Q26	2123	AKR2B	Ankyrin repeat domain-containing protein 2B	protein targeting to chloroplast [GO:0045036];regulation of transcription, DNA-templated [GO:0006355]	cytosol [GO:0005829];integral component of chloroplast outer membrane [GO:0031359];mitochondrion [GO:0005739];nucleus [GO:0005634];plasma membrane [GO:0005886]	chloroplast targeting sequence binding [GO:0030941];lipid binding [GO:0008289]	+	17	13	13	57.6	47.4	47.4	36.899	0	89.548	9096700000	98	415790000	430560000	251690000	274660000	398800000	445450000	575540000	594490000	453530000	639910000	629470000	448370000	394110000	338700000	344170000	317590000	283450000	314840000	246700000	380690000	331580000	183850000	232050000	170730000	40.4	45.1	42.2
+	1.82557	1.47514	O48818	O48818	1296	EXPA4	Expansin-A4	plant-type cell wall organization [GO:0009664];syncytium formation [GO:0006949]	cytosol [GO:0005829];extracellular region [GO:0005576];membrane [GO:0016020];plant-type cell wall [GO:0009505];plasmodesma [GO:0009506]		+	2	2	2	8.2	8.2	8.2	27.847	0.0014848	2.2519	457370000	5	9676600	12880000	12299000	17501000	44500000	72632000	23580000	39338000	22188000	26405000	28995000	49461000	21601000	27585000	0	0	0	48730000	0	0	0	0	0	0	3.5	3.5	3.5
+	1.70792	1.47338	Q01525	Q01525	2010	GRF2	14-3-3-like protein GF14 omega	brassinosteroid mediated signaling pathway [GO:0009742]	cytosol [GO:0005829];Golgi apparatus [GO:0005794];mitochondrion [GO:0005739];nucleus [GO:0005634];plasma membrane [GO:0005886];vacuolar membrane [GO:0005774];vacuole [GO:0005773]		+	30	17	17	84.6	57.1	57.1	29.161	0	312.43	19907000000	210	1481200000	1723500000	1144000000	1139000000	2593400000	2418800000	2195100000	2383400000	322610000	256190000	308120000	268880000	320770000	282550000	290650000	297390000	391700000	247750000	313530000	378840000	269320000	306410000	314420000	259730000	77.2	77.2	78.8
+	1.40851	1.47203	Q9FPJ4	Q9FPJ4	4239	RABD2B	Ras-related protein RABD2b	intracellular protein transport [GO:0006886];pollen tube growth [GO:0009860];Rab protein signal transduction [GO:0032482];vesicle-mediated transport [GO:0016192]	endomembrane system [GO:0012505];Golgi apparatus [GO:0005794];Golgi membrane [GO:0000139];plasma membrane [GO:0005886];plastid [GO:0009536]	GTP binding [GO:0005525];GTPase activity [GO:0003924]	+	15	15	3	86.6	86.6	18.8	22.313	0	145.68	8113700000	164	646310000	622640000	560270000	493810000	538420000	675560000	667410000	582050000	222990000	191150000	261760000	179300000	109100000	128410000	234360000	209670000	317670000	199410000	329250000	259400000	163590000	144190000	187860000	189110000	81.2	80.2	80.2
+	2.79183	1.46757	O82291	O82291	1572	PAP3	Probable plastid-lipid-associated protein 3, chloroplastic		chloroplast [GO:0009507];chloroplast thylakoid [GO:0009534];chloroplast thylakoid membrane [GO:0009535];endoplasmic reticulum [GO:0005783];plastid [GO:0009536];plastoglobule [GO:0010287];thylakoid [GO:0009579]		+	23	23	23	54.8	54.8	54.8	40.505	0	323.31	97402000000	404	605990000	575770000	528720000	601930000	861750000	1106700000	444720000	923090000	5571600000	5805900000	7019300000	5604000000	4783500000	5102200000	5227100000	5669500000	6479000000	4955400000	6559900000	6846300000	5469500000	5381400000	5558200000	5720800000	20.5	24.2	22.6
+	2.71168	1.4658	Q8L7U5	Q8L7U5	2818	BSL1	Serine/threonine-protein phosphatase BSL1	brassinosteroid mediated signaling pathway [GO:0009742]	cytoplasm [GO:0005737];cytosol [GO:0005829];nucleus [GO:0005634];plasma membrane [GO:0005886]	metal ion binding [GO:0046872];protein serine/threonine phosphatase activity [GO:0004722]	+	52	52	48	61.4	61.4	57.3	96.145	0	323.31	44780000000	709	1403200000	1597900000	1427700000	1326600000	1733000000	1531200000	1486500000	1386200000	2142700000	2027900000	2349300000	2119100000	1706200000	1938800000	2047700000	2203600000	1893900000	1492400000	2196300000	2204600000	2209000000	2055300000	2305400000	1996000000	44.7	51.6	50.6
+	1.70806	1.46353	Q9SQR1	Q9SQR1	5519	At3g04010	At3g04010	carbohydrate metabolic process [GO:0005975]	anchored component of membrane [GO:0031225];anchored component of plasma membrane [GO:0046658]	hydrolase activity, hydrolyzing O-glycosyl compounds [GO:0004553]	+	7	7	6	12.2	12.2	11	54.059	0	20.378	2376900000	50	187170000	207240000	183340000	228010000	279020000	278170000	113950000	229410000	57953000	54316000	19693000	15421000	38411000	81488000	38591000	52695000	49699000	31701000	52749000	45203000	35745000	39528000	31781000	25612000	10.6	10.6	12.2
+	2.92324	1.447	Q9SII8	Q9SII8	5364	DSK2B	Ubiquitin domain-containing protein DSK2b	ubiquitin-dependent protein catabolic process [GO:0006511]	cytosol [GO:0005829];mitochondrion [GO:0005739];nucleus [GO:0005634]	polyubiquitin modification-dependent protein binding [GO:0031593]	+	16	16	9	41.7	41.7	26.3	58.053	0	297.25	15338000000	167	1259000000	1481200000	1219700000	1302400000	1901500000	1701400000	1953200000	1976200000	261610000	264820000	298000000	261300000	97988000	110300000	127140000	111890000	151830000	128180000	215110000	192280000	62919000	88572000	96894000	74570000	37.7	35.6	41.7
+	2.45043	1.44625	Q8VYW2	Q8VYW2	3152	BAM9	Inactive beta-amylase 9	polysaccharide catabolic process [GO:0000272]	cytoplasm [GO:0005737]	beta-amylase activity [GO:0016161]	+	6	6	6	19.6	19.6	19.6	58.28	0	10.839	332400000	7	2585500	3108900	0	0	7970200	14526000	52381000	56137000	53895000	23968000	30358000	17328000	10996000	11315000	13013000	34815000	0	0	0	0	0	0	0	0	3.5	1.9	0
+	4.9366	1.44403	Q9M9S3	Q9M9S3	5093	WHY1	Single-stranded DNA-binding protein WHY1, chloroplastic	defense response [GO:0006952];DNA repair [GO:0006281];negative regulation of telomere maintenance via telomerase [GO:0032211];regulation of transcription, DNA-templated [GO:0006355]	chloroplast [GO:0009507];chloroplast nucleoid [GO:0042644];extracellular region [GO:0005576];plastid chromosome [GO:0009508]	DNA binding [GO:0003677];mRNA binding [GO:0003729];single-stranded DNA binding [GO:0003697];telomeric DNA binding [GO:0042162]	+	14	11	11	52.9	45.2	45.2	29.058	0	123.13	5344700000	107	33196000	59430000	22339000	54898000	89126000	96137000	97908000	115380000	371410000	338760000	395620000	391590000	243500000	247100000	214730000	252120000	513900000	373880000	469590000	384280000	130160000	178350000	145000000	126270000	22.8	29.3	19
+	3.56913	1.44269	Q9LY14	Q9LY14	4849	MSRA3	Peptide methionine sulfoxide reductase A3	cellular response to oxidative stress [GO:0034599];response to light stimulus [GO:0009416]	cytoplasm [GO:0005737];cytosol [GO:0005829];plasma membrane [GO:0005886]	L-methionine-(S)-S-oxide reductase activity [GO:0036456];peptide-methionine (S)-S-oxide reductase activity [GO:0008113]	+	13	11	8	68.8	61.4	48	22.545	0	323.31	21034000000	200	666510000	984850000	716680000	769950000	689450000	890370000	739400000	968800000	1287900000	1212900000	681420000	594870000	786240000	1166000000	1013600000	1056200000	996560000	754450000	636170000	667370000	1286600000	724620000	1087700000	655150000	65.8	67.3	53.5
+	1.72134	1.44005	Q9SU40;REV__Q8L7Y9	Q9SU40	5627	SKU5	Monocopper oxidase-like protein SKU5	cell tip growth [GO:0009932];iron ion homeostasis [GO:0055072];iron ion transport [GO:0006826]	anchored component of membrane [GO:0031225];anchored component of plasma membrane [GO:0046658];apoplast [GO:0048046];cell wall [GO:0005618];cytosol [GO:0005829];plant-type cell wall [GO:0009505];plasma membrane [GO:0005886];plasmodesma [GO:0009506];vacuolar membrane [GO:0005774]	copper ion binding [GO:0005507];ferroxidase activity [GO:0004322]	+	37	37	37	45.7	45.7	45.7	65.637	0	323.31	115590000000	687	772670000	654180000	721060000	640250000	899520000	1127500000	884850000	816970000	7479900000	6924800000	8809300000	6932600000	6024000000	6905300000	5893800000	7210600000	6307700000	5333000000	6346300000	6868700000	7919700000	5888300000	7142300000	7086100000	29.6	26.7	26.2
+	1.16275	1.43342	O22187	O22187	1130	At2g23200	Probable receptor-like protein kinase At2g23200	protein autophosphorylation [GO:0046777]	integral component of membrane [GO:0016021];plasma membrane [GO:0005886];plasmodesma [GO:0009506];vacuole [GO:0005773]	ATP binding [GO:0005524];protein kinase activity [GO:0004672];protein serine/threonine kinase activity [GO:0004674]	+	5	4	4	5.6	4.6	4.6	93.378	0.00057176	2.6999	643840000	37	0	0	0	0	0	0	0	0	34503000	34972000	35579000	39274000	41737000	43465000	38515000	48408000	35161000	43064000	44139000	52801000	47820000	39091000	44602000	20715000	0	0	0
+	3.13976	1.42522	O22173	O22173	1129	PAB4	Polyadenylate-binding protein 4	regulation of translation [GO:0006417];response to cadmium ion [GO:0046686];viral process [GO:0016032]	cytoplasm [GO:0005737];cytosol [GO:0005829];nucleus [GO:0005634];ribonucleoprotein complex [GO:1990904];vacuole [GO:0005773]	mRNA 3'-UTR binding [GO:0003730];mRNA binding [GO:0003729];poly(A) binding [GO:0008143];poly(U) RNA binding [GO:0008266];RNA binding [GO:0003723]	+	65	65	60	66.2	66.2	64.8	71.652	0	323.31	107580000000	939	5729900000	5564200000	4594000000	4334200000	6724500000	7452400000	7286900000	7584400000	3835100000	3182700000	3629200000	3291600000	2843400000	5411600000	2954800000	3321000000	4245100000	3400100000	4532100000	4788600000	3346600000	3013500000	3448000000	3063800000	55.4	61.3	58
+	2.29955	1.42322	Q9C5Z1	Q9C5Z1	3697	TIF3B1	Eukaryotic translation initiation factor 3 subunit B	formation of cytoplasmic translation initiation complex [GO:0001732];translational initiation [GO:0006413]	eukaryotic 43S preinitiation complex [GO:0016282];eukaryotic 48S preinitiation complex [GO:0033290];eukaryotic translation initiation factor 3 complex [GO:0005852]	translation initiation factor activity [GO:0003743];translation initiation factor binding [GO:0031369]	+	75	75	17	73.2	73.2	25.3	81.874	0	323.31	56447000000	532	6043300000	5856500000	5560400000	4758600000	7768000000	8052800000	7587500000	7488200000	305900000	262500000	303690000	230840000	119760000	185760000	203670000	223210000	250860000	207220000	194800000	258080000	215230000	132310000	134330000	103470000	63.1	69.1	65
+	2.06318	1.42194	Q8H0V6	Q8H0V6	2704	ABCF3	ABC transporter F family member 3	defense response to bacterium [GO:0042742];response to cadmium ion [GO:0046686]	cytosol [GO:0005829];nucleus [GO:0005634]	ATP binding [GO:0005524];ATPase activity [GO:0016887]	+	41	41	41	55.8	55.8	55.8	79.643	0	272.6	18180000000	365	1183200000	1416300000	1068300000	1028500000	2120300000	2183100000	1871700000	1974000000	256280000	290390000	341320000	261030000	241720000	380060000	283410000	379920000	484950000	384420000	553860000	503050000	277850000	174340000	323600000	198170000	48.1	47.6	41.8
+	1.43525	1.41739	Q9XFH9	Q9XFH9	5823	At5g16400	Thioredoxin F2, chloroplastic	cell redox homeostasis [GO:0045454];oxidation-reduction process [GO:0055114];positive regulation of catalytic activity [GO:0043085];response to light intensity [GO:0009642]	chloroplast [GO:0009507];chloroplast stroma [GO:0009570];cytosol [GO:0005829];plastid [GO:0009536]	enzyme activator activity [GO:0008047]	+	15	8	8	47	30.8	30.8	19.999	0	16.111	819120000	53	5269200	10548000	36719000	5607000	0	8195700	8530700	9300200	90687000	69743000	76466000	75635000	42973000	29622000	20935000	47893000	41728000	35992000	35097000	52018000	45878000	32760000	28924000	8596300	6.5	6.5	4.9
+	1.7601	1.4149	F4JEJ3	F4JEJ3	836	At3g13800	Metallo-hydrolase/oxidoreductase superfamily protein			hydrolase activity [GO:0016787]	+	16	16	16	71.3	71.3	71.3	31.512	0	196.04	7928100000	158	55367000	104690000	90622000	61746000	69674000	114540000	66193000	93337000	539230000	566600000	432210000	407330000	334930000	426780000	507520000	460170000	435490000	265970000	487490000	463560000	516950000	424250000	607630000	395840000	19.7	33.3	32.6
+	2.52959	1.4125	Q9FPJ8	Q9FPJ8	4240	RBP45A	Polyadenylate-binding protein RBP45A	mRNA processing [GO:0006397]	cytosol [GO:0005829];nucleus [GO:0005634]	mRNA binding [GO:0003729];poly(A) binding [GO:0008143]	+	15	14	14	45	42.9	42.9	42.323	0	300.08	22547000000	242	1874700000	1959400000	1447400000	1585400000	2649500000	2803900000	2608100000	2780900000	425130000	293130000	490310000	374390000	298360000	221200000	268000000	173910000	547680000	321720000	406090000	433550000	165440000	121790000	181210000	115340000	43.4	44.7	44.7
+	3.40033	1.41164	F4HWC3	F4HWC3	564	At1g20970	Calponin-like domain protein		integral component of membrane [GO:0016021];plasma membrane [GO:0005886];vacuole [GO:0005773]	mRNA binding [GO:0003729]	+	17	17	17	13.2	13.2	13.2	150.16	0	26.125	7847400000	118	722390000	673270000	548010000	581600000	980510000	1077100000	94336000	1064200000	124330000	134290000	147290000	145220000	80605000	135980000	119690000	135560000	139830000	97545000	208160000	234110000	94294000	124800000	100920000	83384000	4.8	6.6	6.3
+	1.64054	1.40985	Q8RXF1	Q8RXF1	3034	At1g14650	Probable splicing factor 3A subunit 1	mRNA splicing, via spliceosome [GO:0000398]	catalytic step 2 spliceosome [GO:0071013];U2 snRNP [GO:0005686];U2-type prespliceosome [GO:0071004];U2-type spliceosomal complex [GO:0005684]	RNA binding [GO:0003723]	+	23	23	23	34	34	34	87.593	0	72.55	5869100000	131	548580000	547670000	440080000	418440000	643210000	451260000	587050000	516690000	185000000	154410000	138940000	158460000	88379000	42157000	124740000	76243000	117190000	78254000	125040000	137810000	91648000	86504000	52330000	59038000	27	23.4	24.1
+	2.22831	1.40758	Q67Y99	Q67Y99	2415	CLPF	Clp protease adapter protein ClpF, chloroplastic		chloroplast [GO:0009507];chloroplastic endopeptidase Clp complex [GO:0009840]	DNA binding [GO:0003677]	+	4	4	4	17	17	17	37.44	0	15.982	743190000	19	0	0	0	0	0	0	0	0	17926000	28024000	10269000	14420000	72923000	64522000	51906000	67877000	53651000	67048000	70922000	65821000	51589000	27795000	60428000	18066000	0	0	0
+	1.28599	1.40386	O04373	O04373	1098	ILL4	IAA-amino acid hydrolase ILR1-like 4	auxin metabolic process [GO:0009850];response to wounding [GO:0009611]	endoplasmic reticulum [GO:0005783];endoplasmic reticulum lumen [GO:0005788];nucleus [GO:0005634];plasma membrane [GO:0005886]	hydrolase activity [GO:0016787];IAA-Ala conjugate hydrolase activity [GO:0010179];metal ion binding [GO:0046872]	+	28	28	28	59.3	59.3	59.3	48.263	0	312.95	19594000000	277	1815000000	2404100000	1202400000	1503600000	1779700000	1761200000	1674300000	1985300000	373550000	346090000	420550000	364500000	212110000	314270000	338310000	314020000	294950000	204180000	411210000	406400000	353500000	368990000	391080000	354220000	57.5	55.5	52.5
+	1.60118	1.4022	Q9C576	Q9C576	3656	At5g22120	At5g22100			nucleic acid binding [GO:0003676]	+	6	6	6	18.3	18.3	18.3	42.092	0	19.464	1869300000	61	86381000	83693000	60554000	44512000	101070000	68577000	111570000	62381000	71328000	73387000	94285000	92179000	25913000	56032000	78900000	104540000	67064000	24807000	88040000	105310000	82720000	84925000	79497000	121690000	15.1	13.3	9.1
+	2.35229	1.40107	Q94K76	Q94K76	3578	At5g18470	Curculin-like (Mannose-binding) lectin family protein	response to karrikin [GO:0080167]	plant-type cell wall [GO:0009505]	carbohydrate binding [GO:0030246]	+	8	8	8	20.8	20.8	20.8	45.807	0	15.142	3338200000	56	0	0	0	0	0	0	0	0	97436000	172690000	115220000	130440000	266710000	370910000	250950000	290090000	211840000	210860000	211850000	209270000	201060000	202000000	191810000	205040000	0	0	0
+	2.19135	1.39101	Q9LHN3	Q9LHN3	4458	At3g18860	AT3g18860/MCB22_3	proteasome-mediated ubiquitin-dependent protein catabolic process [GO:0043161];ubiquitin recycling [GO:0010992]	cytoplasm [GO:0005737];cytosol [GO:0005829];nucleus [GO:0005634];plasmodesma [GO:0009506]	ubiquitin binding [GO:0043130]	+	51	51	51	71.8	71.8	71.8	84.273	0	323.31	28399000000	356	3579200000	3889200000	2588600000	2914600000	3306900000	3787500000	3449300000	2985200000	133510000	146150000	101240000	130710000	110180000	149800000	119940000	182790000	59894000	46147000	110860000	144310000	109420000	121090000	102050000	130280000	71.6	70.5	61.6
+	2.89947	1.3905	Q0WR30;Q9LME7	Q0WR30;Q9LME7	2074	At1g78260;At1g22330	RNA-binding (RRM/RBD/RNP motifs) family protein		integral component of membrane [GO:0016021];nucleus [GO:0005634]	mRNA binding [GO:0003729]	+	7	7	5	18.5	18.5	14.8	30.334	0	68.9	3994900000	54	274120000	280450000	270390000	260300000	542240000	425270000	424320000	489180000	98883000	68047000	47477000	74310000	108290000	133910000	47077000	140370000	28006000	108980000	11217000	26419000	37080000	29480000	30166000	38960000	17.3	18.1	17.3
+	1.19644	1.38648	P0DO23	P0DO23	1627	CP2	2-oxoglutarate and iron-dependent oxygenase domain-containing protein CP2		nucleoplasm [GO:0005654];nucleus [GO:0005634]	dioxygenase activity [GO:0051213];iron ion binding [GO:0005506];L-ascorbic acid binding [GO:0031418];oxidoreductase activity, acting on paired donors, with incorporation or reduction of molecular oxygen [GO:0016705]	+	4	4	4	11.7	11.7	11.7	45.179	0	3.4003	578610000	6	7853200	17473000	7132000	8340300	38076000	57507000	46468000	0	43644000	70664000	0	45105000	51211000	0	28831000	33941000	28337000	23541000	28332000	26700000	15454000	0	0	0	2	6.1	4.1
+	1.46764	1.38608	Q9FGN6	Q9FGN6	3952	LRR-RLK	Leucine-rich repeat receptor-like protein kinase	hormone-mediated signaling pathway [GO:0009755];negative regulation of secondary growth [GO:2000604]	integral component of membrane [GO:0016021];plasma membrane [GO:0005886]	ATP binding [GO:0005524];protein kinase activity [GO:0004672]	+	3	3	3	3.8	3.8	3.8	98.905	1	-2	1906500000	8	19203000	21025000	13751000	15340000	0	33672000	11903000	18332000	192060000	135350000	126600000	102430000	118060000	122060000	87115000	78542000	160430000	143160000	120950000	87146000	96790000	88785000	63349000	50411000	1.2	1.2	0.9
+	1.93969	1.37677	Q9ZW85	Q9ZW85	6033	SSU1	3-isopropylmalate dehydratase small subunit 1	chloroplast organization [GO:0009658];gametophyte development [GO:0048229];glucosinolate biosynthetic process [GO:0019761];leucine biosynthetic process [GO:0009098]	chloroplast [GO:0009507];chloroplast stroma [GO:0009570];plastid [GO:0009536]	3-isopropylmalate dehydratase activity [GO:0003861]	+	18	17	16	48.6	48.6	48.6	26.79	0	323.31	40166000000	245	1327300000	1099200000	821710000	787790000	2129900000	2180400000	1801100000	2185700000	2208600000	2243000000	1501700000	1501800000	1285800000	1856100000	1653800000	1987000000	2600300000	1564400000	2195000000	1793200000	1654600000	1170100000	1490900000	1126700000	48.2	41.8	41.8
+	1.44476	1.37048	P93025	P93025	1979	PHOT2	Phototropin-2	chloroplast relocation [GO:0009902];circadian rhythm [GO:0007623];negative regulation of anion channel activity by blue light [GO:0010362];phototropism [GO:0009638];protein autophosphorylation [GO:0046777];protein phosphorylation [GO:0006468];protein-chromophore linkage [GO:0018298];response to blue light [GO:0009637];stomatal movement [GO:0010118]	cytoplasm [GO:0005737];Golgi apparatus [GO:0005794];membrane [GO:0016020];nucleus [GO:0005634];plasma membrane [GO:0005886];plastid [GO:0009536]	ATP binding [GO:0005524];blue light photoreceptor activity [GO:0009882];FMN binding [GO:0010181];identical protein binding [GO:0042802];kinase activity [GO:0016301];protein serine/threonine kinase activity [GO:0004674]	+	35	33	33	38.8	35.8	35.8	102.47	0	168.42	13444000000	228	17613000	17437000	8442000	10629000	24340000	48623000	45479000	0	739860000	675290000	657840000	651300000	867820000	931340000	901150000	1032100000	954250000	733350000	927790000	924230000	777240000	773190000	807720000	917360000	1.2	2.3	0.8
+	1.20654	1.3704	Q9C9W3	Q9C9W3	3819	At1g67980	Putative caffeoyl-CoA O-methyltransferase At1g67980	lignin biosynthetic process [GO:0009809];methylation [GO:0032259]	cytosol [GO:0005829]	caffeoyl-CoA O-methyltransferase activity [GO:0042409];metal ion binding [GO:0046872];S-adenosylmethionine-dependent methyltransferase activity [GO:0008757]	+	8	8	6	38.4	38.4	30.6	26.114	0	5.9315	2498700000	24	0	0	6243500	0	3915500	0	0	0	249830000	173120000	293540000	296240000	533770000	485350000	61005000	42301000	74084000	43641000	59664000	18530000	38381000	39349000	38954000	40742000	0	0	4.7
+	2.12474	1.36855	Q9SU14	Q9SU14	5624	NUDT7	Nudix hydrolase 7	signal transduction [GO:0007165]	cytoplasm [GO:0005737];nucleus [GO:0005634];plasma membrane [GO:0005886]	ADP-ribose diphosphatase activity [GO:0047631];metal ion binding [GO:0046872];NAD binding [GO:0051287];NAD+ diphosphatase activity [GO:0000210];NADH pyrophosphatase activity [GO:0035529]	+	23	23	23	75.5	75.5	75.5	31.884	0	323.31	41896000000	369	533310000	614450000	412720000	405830000	608090000	607130000	552050000	520280000	2476100000	2884200000	3195500000	2242900000	1790800000	2076200000	1895800000	2121600000	2442000000	1485900000	2383800000	2193100000	2606400000	2417400000	2887500000	2543400000	59.2	37.9	45
+	2.57574	1.35501	Q8RWH9	Q8RWH9	2986	NUP58	Nuclear pore complex protein NUP58	mRNA transport [GO:0051028];protein transport [GO:0015031]	nuclear envelope [GO:0005635];nuclear pore [GO:0005643]	nuclear localization sequence binding [GO:0008139];structural constituent of nuclear pore [GO:0017056]	+	4	4	4	9	9	9	56.541	0	7.8547	607990000	11	34893000	19299000	14413000	14854000	35838000	41210000	23993000	72260000	40689000	39690000	45647000	58547000	11936000	14957000	6219800	5871500	20323000	28976000	32789000	23617000	2728300	4014700	2535700	12688000	6.8	3.3	3.3
+	1.21269	1.34965	Q9AST9	Q9AST9	3629	At1g73110	At1g73110/F3N23_39		chloroplast [GO:0009507];chloroplast thylakoid membrane [GO:0009535];mitochondrion [GO:0005739]	ATP binding [GO:0005524];hydrolase activity [GO:0016787]	+	2	2	2	6	6	6	48.325	0	8.2369	604780000	5	0	0	0	0	0	0	0	0	42711000	43775000	49241000	56276000	36459000	43857000	43004000	42484000	49448000	35210000	41871000	28659000	24235000	34876000	23116000	9557100	0	0	0
+	2.02709	1.34917	Q940S9	Q940S9	3392	At3g57890	AT3g57890/T10K17_100	cell morphogenesis [GO:0000902]			+	31	31	29	57.8	57.8	54.3	62.778	0	318.86	36178000000	347	2914100000	2966300000	2632900000	2384900000	3598000000	3379200000	3075000000	3094600000	929660000	920030000	995520000	950060000	750540000	760780000	846910000	852220000	577970000	347060000	724310000	453820000	849360000	874700000	621830000	678160000	48	49.6	49.6
+	3.06548	1.34667	Q8L835	Q8L835	2826	At1g18070	At1g18070	nuclear-transcribed mRNA catabolic process, deadenylation-dependent decay [GO:0000288]		GTP binding [GO:0005525];GTPase activity [GO:0003924];translation elongation factor activity [GO:0003746];translation initiation factor activity [GO:0003743];translation release factor activity [GO:0003747]	+	61	61	61	74.4	74.4	74.4	59.242	0	323.31	110390000000	1143	4367300000	5006300000	3900200000	3857900000	5383000000	5912800000	5232500000	5301400000	4080900000	3663900000	4760300000	3992800000	3441600000	4058100000	4139500000	4596700000	5546000000	3224800000	5164300000	5059700000	5280500000	4548400000	4880000000	4991400000	67.1	68.6	63.9
+	1.62686	1.34061	Q9FVR9	Q9FVR9	4278	At1g57770	FAD/NAD(P)-binding oxidoreductase family protein		chloroplast [GO:0009507];nucleus [GO:0005634]	oxidoreductase activity [GO:0016491]	+	35	35	35	64.1	64.1	64.1	61.723	0	282.79	23225000000	354	8799400	22640000	11756000	14719000	7619600	120480000	14683000	15360000	1475300000	1738400000	2772800000	2355800000	654820000	674790000	1246200000	1202300000	1856400000	742360000	1415600000	2175100000	878040000	1130500000	1313100000	1377000000	1.2	5.4	1.2
+	2.07853	1.33353	Q9SR19	Q9SR19	5533	RAF1.2	Rubisco accumulation factor 1.2, chloroplastic	chloroplast ribulose bisphosphate carboxylase complex assembly [GO:0110102]	chloroplast [GO:0009507];chloroplast stroma [GO:0009570];cytosol [GO:0005829]		+	26	26	26	44.8	44.8	44.8	50.199	0	166.09	14228000000	268	6241800	7104500	0	0	3942400	19968000	2065800	0	1114800000	1042000000	1205100000	1239200000	618240000	605830000	548720000	648520000	1198400000	1173100000	1243900000	1390700000	562450000	543200000	575710000	478690000	3.8	5.8	0
+	1.758	1.32836	Q9FYR6	Q9FYR6	4333	OVA6	Proline--tRNA ligase, chloroplastic/mitochondrial	embryo sac development [GO:0009553];plant ovule development [GO:0048481];prolyl-tRNA aminoacylation [GO:0006433];regulation of photosynthesis [GO:0010109];seed development [GO:0048316]	aminoacyl-tRNA synthetase multienzyme complex [GO:0017101];chloroplast [GO:0009507];chloroplast stroma [GO:0009570];cytoplasm [GO:0005737];mitochondrion [GO:0005739]	ATP binding [GO:0005524];proline-tRNA ligase activity [GO:0004827]	+	43	43	43	70	70	70	60.746	0	323.31	72549000000	647	451830000	421690000	371160000	301660000	545600000	487260000	458770000	575120000	5560000000	5210500000	4332900000	4249500000	3637900000	3945300000	3858600000	4267700000	4631000000	3149500000	4193000000	4488600000	4301400000	4471500000	4297200000	4341900000	42.2	31.1	34.1
+	1.39786	1.32448	Q9CAI7	Q9CAI7	3845	TIF4A-3	Eukaryotic initiation factor 4A-3	cytoplasmic translational initiation [GO:0002183]	cytoplasmic stress granule [GO:0010494];cytosol [GO:0005829];mitochondrion [GO:0005739];plant-type cell wall [GO:0009505];vacuolar membrane [GO:0005774]	ATP binding [GO:0005524];RNA binding [GO:0003723];RNA helicase activity [GO:0003724];translation initiation factor activity [GO:0003743]	+	42	18	18	72	40.8	40.8	46.77	0	144.21	25749000000	136	2969300000	2189400000	1929600000	1553300000	3635400000	3380300000	3130100000	3291000000	344620000	196350000	288630000	260980000	192080000	205440000	204160000	184860000	331890000	215860000	307660000	261350000	208180000	196530000	167730000	104120000	64.3	59.2	60.9
+	2.29225	1.31999	F4IPY2	F4IPY2	712	SYCO	Cysteine--tRNA ligase, chloroplastic/mitochondrial	cristae formation [GO:0042407];cysteinyl-tRNA aminoacylation [GO:0006423];polar nucleus fusion [GO:0010197];regulation of programmed cell death [GO:0043067]	chloroplast [GO:0009507];chloroplast stroma [GO:0009570];cytoplasm [GO:0005737];cytosol [GO:0005829];mitochondrion [GO:0005739]	ATP binding [GO:0005524];cysteine-tRNA ligase activity [GO:0004817];metal ion binding [GO:0046872]	+	31	31	31	51	51	51	63.913	0	188.02	13954000000	270	4415500	7720500	18259000	0	11461000	17328000	0	5857900	1034300000	931260000	1023600000	917840000	702130000	728970000	894190000	865480000	876900000	578990000	813820000	862040000	932410000	973780000	836970000	916140000	3.9	2.8	4.4
+	4.1011	1.31993	Q8LDU0	Q8LDU0	2902	At4g28355	At4g28360	ribosome assembly [GO:0042255];translation [GO:0006412]	large ribosomal subunit [GO:0015934];mitochondrial large ribosomal subunit [GO:0005762];mitochondrion [GO:0005739]	structural constituent of ribosome [GO:0003735]	+	8	8	8	24.4	24.4	24.4	30.456	0	3.9748	6859000000	52	300640000	294920000	270360000	288300000	379970000	422260000	422190000	476430000	233470000	241110000	196380000	205590000	219720000	259270000	260060000	234750000	325790000	382090000	277620000	280780000	230120000	213670000	213360000	230140000	12.2	12.5	13.7
+	1.98702	1.317	Q41969	Q41969	2249	EIF2B	Eukaryotic translation initiation factor 2 subunit beta	formation of cytoplasmic translation initiation complex [GO:0001732];formation of translation preinitiation complex [GO:0001731]	eukaryotic translation initiation factor 2 complex [GO:0005850];plasma membrane [GO:0005886];plastid [GO:0009536]	metal ion binding [GO:0046872];mRNA binding [GO:0003729];translation initiation factor activity [GO:0003743];translation initiation factor binding [GO:0031369]	+	26	26	26	73.1	73.1	73.1	30.663	0	269.23	21125000000	333	1306000000	1144800000	1035600000	1048000000	1824200000	2100700000	2039900000	2027400000	456530000	446020000	834220000	737510000	456730000	358080000	469850000	335330000	555310000	496320000	710900000	701310000	436960000	541620000	484000000	577750000	63.8	65.7	65.7
+	2.23443	1.31249	Q38896	Q38896	2149	CSP4	Cold shock domain-containing protein 4	embryo development ending in seed dormancy [GO:0009793];fruit development [GO:0010154];response to cold [GO:0009409]	cytosol [GO:0005829];nucleolus [GO:0005730];nucleus [GO:0005634]	DNA binding [GO:0003677];mRNA binding [GO:0003729];zinc ion binding [GO:0008270]	+	9	7	7	41.3	36.8	36.8	19.077	0	270.05	11666000000	96	859790000	1016700000	659970000	692460000	1691800000	1519900000	1741400000	1760000000	185610000	195690000	247040000	204650000	75852000	77799000	91841000	99787000	87973000	22945000	99288000	113850000	54896000	72205000	35268000	58983000	36.3	34.3	36.3
+	1.97507	1.3119	P0C895	P0C895	1611	At2g30105	LRR repeats and ubiquitin-like domain-containing protein At2g30105				+	9	9	9	27.5	27.5	27.5	41.337	0	18.939	1775800000	71	58352000	64791000	51131000	55249000	110350000	105160000	96011000	82965000	59837000	93721000	60619000	56107000	70833000	64796000	85852000	56697000	90916000	74177000	69213000	71568000	59897000	83861000	74119000	79542000	12.3	9.9	9.9
+	1.38641	1.31168	Q9SCV9	Q9SCV9	5239	BGAL3	Beta-galactosidase 3	carbohydrate metabolic process [GO:0005975]	apoplast [GO:0048046];cell wall [GO:0005618];plant-type cell wall [GO:0009505];plasma membrane [GO:0005886];vacuole [GO:0005773]	beta-galactosidase activity [GO:0004565];carbohydrate binding [GO:0030246]	+	6	5	5	6.9	6.2	6.2	95.192	0.0077931	1.5521	357350000	5	17357000	31031000	16085000	7520100	12561000	22175000	29093000	22668000	0	0	0	0	5496500	6783100	6500100	18310000	26117000	28798000	35560000	18394000	0	15436000	17462000	20006000	1.6	3.3	2.3
+	3.58125	1.30906	Q8VYJ6	Q8VYJ6	3131	SWAP70	At2g30880/F7F1.9	defense response to bacterium [GO:0042742];intracellular signal transduction [GO:0035556];peptidyl-serine phosphorylation [GO:0018105]		protein serine/threonine kinase activity [GO:0004674]	+	15	15	15	28.2	28.2	28.2	56.023	0	72.527	3657800000	92	253900000	229720000	164980000	155570000	277050000	279630000	270030000	234790000	106440000	96061000	133780000	65734000	130410000	138160000	96604000	176900000	154460000	99982000	84157000	145350000	77065000	64549000	108810000	113680000	25.8	20.8	26
+	4.2756	1.30697	Q93VK7	Q93VK7	3277	At5g14910	AT5g14910/F2G14_30	metal ion transport [GO:0030001]	chloroplast [GO:0009507];chloroplast envelope [GO:0009941];chloroplast stroma [GO:0009570];chloroplast thylakoid membrane [GO:0009535];plastid [GO:0009536];thylakoid [GO:0009579]	metal ion binding [GO:0046872]	+	4	4	4	27.5	27.5	27.5	18.956	0	155.19	3819000000	55	69354000	84346000	95071000	110670000	85913000	129780000	116280000	104480000	341580000	134860000	319480000	320110000	135210000	139530000	170670000	140810000	330260000	227990000	321870000	255780000	31328000	36245000	32909000	84525000	6.7	6.7	6.7
+	4.56733	1.30257	Q9LIK9	Q9LIK9	4486	APS1	ATP sulfurylase 1, chloroplastic	hydrogen sulfide biosynthetic process [GO:0070814];response to cadmium ion [GO:0046686];selenium compound metabolic process [GO:0001887];sulfate assimilation [GO:0000103]	chloroplast [GO:0009507];chloroplast stroma [GO:0009570];plasma membrane [GO:0005886]	ATP binding [GO:0005524];sulfate adenylyltransferase (ATP) activity [GO:0004781]	+	43	43	20	69.1	69.1	47.3	51.458	0	323.31	52994000000	393	6005300000	6272700000	4795800000	4807700000	7400100000	7552800000	7532100000	7358900000	43907000	83343000	17484000	32938000	88493000	133720000	111590000	115540000	69902000	58377000	50661000	83521000	86697000	101120000	102820000	88546000	68.7	68.3	68
+	2.77087	1.29853	O22263	O22263	1138	PDIL2-1	Protein disulfide-isomerase like 2-1	cell redox homeostasis [GO:0045454];double fertilization forming a zygote and endosperm [GO:0009567];embryo development ending in seed dormancy [GO:0009793];embryo sac development [GO:0009553];pollen tube development [GO:0048868];response to cadmium ion [GO:0046686];response to endoplasmic reticulum stress [GO:0034976]	cytosol [GO:0005829];endoplasmic reticulum [GO:0005783];plant-type cell wall [GO:0009505];secretory vesicle [GO:0099503];vacuolar membrane [GO:0005774]	protein disulfide isomerase activity [GO:0003756]	+	57	57	56	86.1	86.1	86.1	39.496	0	323.31	91540000000	829	2457100000	2712100000	2106400000	2389100000	5748800000	6944200000	6301700000	6636100000	2983800000	3466500000	3424000000	2930100000	2960900000	3775600000	3531300000	3764900000	3706800000	2591800000	3567600000	3776200000	4435900000	3982700000	3874900000	3471800000	80.6	80.6	77.6
+	3.15242	1.29744	Q9XJ36	Q9XJ36	5864	CLPR2	ATP-dependent Clp protease proteolytic subunit-related protein 2, chloroplastic	chloroplast organization [GO:0009658];protein quality control for misfolded or incompletely synthesized proteins [GO:0006515]	chloroplast [GO:0009507];chloroplast envelope [GO:0009941];chloroplast stroma [GO:0009570];chloroplast thylakoid [GO:0009534];chloroplastic endopeptidase Clp complex [GO:0009840];endopeptidase Clp complex [GO:0009368];extracellular region [GO:0005576];plastoglobule [GO:0010287]	ATPase binding [GO:0051117];ATP-dependent peptidase activity [GO:0004176];serine-type endopeptidase activity [GO:0004252]	+	15	15	15	55.9	55.9	55.9	31.208	0	126.66	10550000000	148	21899000	18184000	27124000	25982000	8247600	17605000	15588000	31742000	620930000	491190000	617160000	569990000	557340000	611480000	585260000	536600000	1081700000	702590000	944460000	830930000	600570000	582300000	507870000	543780000	10.4	12.5	11.8
+	1.19223	1.29393	P92941	P92941	1957	CLC-A	Chloride channel protein CLC-a	chloride transport [GO:0006821];nitrate transport [GO:0015706];regulation of ion transmembrane transport [GO:0034765];response to nitrate [GO:0010167]	chloride channel complex [GO:0034707];intracellular membrane-bounded organelle [GO:0043231];plant-type vacuole membrane [GO:0009705]	nitrate transmembrane transporter activity [GO:0015112];nitrate:proton symporter activity [GO:0009671];transmembrane transporter activity [GO:0022857];voltage-gated chloride channel activity [GO:0005247]	+	2	2	2	2.2	2.2	2.2	85.405	0.0036483	1.9545	659860000	18	0	2967000	0	0	9831600	8970400	11165000	7157100	66332000	43558000	48788000	41155000	42616000	37339000	37020000	18503000	61327000	37829000	58505000	33122000	27793000	23798000	28449000	13639000	0	1.2	0
+	3.58137	1.29342	O82299	O82299	1573	At2g35410	Putative chloroplast RNA binding protein		chloroplast [GO:0009507];chloroplast stroma [GO:0009570];cytoplasm [GO:0005737];endoplasmic reticulum [GO:0005783];nucleus [GO:0005634];ribonucleoprotein complex [GO:1990904];thylakoid [GO:0009579]	mRNA binding [GO:0003729]	+	25	25	25	59.4	59.4	59.4	33.785	0	323.31	78537000000	376	7171700	0	13338000	0	48377000	37734000	28299000	24806000	7689600000	6462200000	7657300000	6839900000	3529600000	4563400000	3735300000	4546600000	5560600000	3562900000	5380300000	5326500000	3630800000	3546200000	3455200000	2890600000	2.9	0	6.2
+	1.73984	1.29328	Q42565	Q42565	2294	ASB1	Anthranilate synthase beta subunit 1, chloroplastic	glutamine metabolic process [GO:0006541];regulation of auxin biosynthetic process [GO:0010600];tryptophan biosynthetic process [GO:0000162]	chloroplast [GO:0009507]	anthranilate synthase activity [GO:0004049]	+	12	12	12	33	33	33	30.46	0	90.543	9791300000	138	362660000	403490000	290210000	230630000	583400000	538400000	380200000	578980000	506310000	499910000	562140000	371930000	116060000	331440000	471270000	424230000	497340000	223110000	572590000	465100000	426420000	273570000	431460000	250420000	27.9	27.9	29
+	2.70644	1.28384	Q2V2S7	Q2V2S7	2127	ndhM	NAD(P)H-quinone oxidoreductase subunit M, chloroplastic	NADH dehydrogenase complex (plastoquinone) assembly [GO:0010258]	chloroplast [GO:0009507];chloroplast thylakoid membrane [GO:0009535];NAD(P)H dehydrogenase complex (plastoquinone) [GO:0010598];plasma membrane [GO:0005886]	oxidoreductase activity, acting on NAD(P)H, quinone or similar compound as acceptor [GO:0016655];quinone binding [GO:0048038]	+	3	3	3	15.7	15.7	15.7	24.795	0	3.4645	656810000	21	3704000	0	31085000	0	0	0	0	0	17325000	14995000	18509000	20123000	46249000	40762000	56922000	58675000	58103000	56929000	57876000	58526000	38460000	20020000	19988000	38562000	5.1	0	5.1
+	1.35566	1.2829	Q9LJG3	Q9LJG3	4509	ESM1	GDSL esterase/lipase ESM1	defense response to bacterium [GO:0042742];glucosinolate catabolic process [GO:0019762];lipid catabolic process [GO:0016042];response to cold [GO:0009409];response to insect [GO:0009625]	apoplast [GO:0048046];chloroplast [GO:0009507];chloroplast envelope [GO:0009941];cytosol [GO:0005829];cytosolic ribosome [GO:0022626];nucleus [GO:0005634];peroxisome [GO:0005777];plasmodesma [GO:0009506];secretory vesicle [GO:0099503];vacuole [GO:0005773]	hydrolase activity, acting on ester bonds [GO:0016788]	+	32	32	31	63.5	63.5	63.5	44.06	0	323.31	343380000000	840	0	53108000	0	10031000	266540000	276570000	0	316660000	18277000000	16040000000	19713000000	20356000000	19263000000	20711000000	21609000000	21074000000	22439000000	21365000000	25183000000	24436000000	24112000000	24408000000	22762000000	20713000000	0	6.6	0
+	3.45776	1.27359	Q39024	Q39024	2174	MPK4	Mitogen-activated protein kinase 4	cellular response to carbon dioxide [GO:0071244];cortical microtubule organization [GO:0043622];cytokinesis by cell plate formation [GO:0000911];hyperosmotic response [GO:0006972];hypotonic salinity response [GO:0042539];intracellular signal transduction [GO:0035556];jasmonic acid and ethylene-dependent systemic resistance [GO:0009861];jasmonic acid and ethylene-dependent systemic resistance, jas…	cell plate [GO:0009504];cytoplasm [GO:0005737];cytosol [GO:0005829];microtubule [GO:0005874];nucleus [GO:0005634]	ATP binding [GO:0005524];kinase activity [GO:0016301];MAP kinase activity [GO:0004707];protein kinase activity [GO:0004672]	+	24	24	17	67.3	67.3	57.2	42.851	0	214.93	17687000000	228	1343000000	1327900000	1038600000	1030700000	1342500000	1408900000	1193900000	1341100000	503480000	450350000	541790000	405320000	508370000	995700000	372170000	627860000	336330000	216790000	363450000	369140000	453210000	539530000	484030000	493170000	49.2	61.2	60.6
+	1.22154	1.26851	Q9SHI1	Q9SHI1	5335	At1g17220	Translation initiation factor IF-2, chloroplastic		chloroplast [GO:0009507];chloroplast envelope [GO:0009941];chloroplast stroma [GO:0009570];nucleus [GO:0005634]	GTP binding [GO:0005525];GTPase activity [GO:0003924];translation initiation factor activity [GO:0003743]	+	50	50	50	42.6	42.6	42.6	109.75	0	194.52	17348000000	347	16016000	9745600	69445000	18980000	9398500	30674000	1860400	0	973020000	959650000	1048800000	991920000	647830000	893720000	951420000	953940000	1859300000	1185100000	1920300000	1894300000	762590000	745590000	623920000	780380000	2	1	1
+	1.51039	1.2667	Q9FNJ8	Q9FNJ8	4219	ADT5	Arogenate dehydratase 5, chloroplastic	defense response [GO:0006952];L-phenylalanine biosynthetic process [GO:0009094]	chloroplast [GO:0009507];chloroplast stroma [GO:0009570];cytoplasm [GO:0005737]	arogenate dehydratase activity [GO:0047769];prephenate dehydratase activity [GO:0004664]	+	19	19	10	56	56	37.4	45.927	0	323.31	15690000000	135	1786600000	2338500000	1950200000	1784000000	2004900000	1611400000	1743500000	1912900000	49129000	30866000	32593000	50910000	21623000	25728000	20677000	32346000	44779000	43429000	52782000	54842000	20462000	33748000	22676000	21693000	50.4	50.4	46.1
+	2.49984	1.25955	Q9SZN1	Q9SZN1	5777	VHA-B2	V-type proton ATPase subunit B2	ATP metabolic process [GO:0046034];proton transmembrane transport [GO:1902600]	proton-transporting V-type ATPase, V1 domain [GO:0033180];vacuolar membrane [GO:0005774]	ATP binding [GO:0005524];hydrolase activity [GO:0016787]	+	48	11	11	80.1	20.5	20.5	54.304	0	48.591	12510000000	112	1152500000	1179400000	887420000	836540000	1229000000	1426200000	1152100000	1228300000	297250000	168320000	300780000	308230000	158980000	180940000	177560000	208240000	301180000	152410000	222860000	289560000	176140000	140750000	151210000	184320000	79.9	80.1	80.1
+	1.23029	1.25752	Q9SEI4	Q9SEI4	5274	RPT3	26S proteasome regulatory subunit 6B homolog	positive regulation of RNA polymerase II transcription preinitiation complex assembly [GO:0045899];protein catabolic process [GO:0030163]	cell wall [GO:0005618];cytosol [GO:0005829];cytosolic proteasome complex [GO:0031597];nucleus [GO:0005634];plasmodesma [GO:0009506];proteasome complex [GO:0000502];proteasome regulatory particle, base subcomplex [GO:0008540]	ATP binding [GO:0005524];proteasome-activating ATPase activity [GO:0036402]	+	41	40	40	81.1	78.2	78.2	45.751	0	323.31	71571000000	403	8037500000	8857200000	6674700000	6669800000	9926000000	10582000000	10007000000	9992500000	26064000	99994000	249150000	47415000	19927000	60018000	41095000	85714000	13252000	64726000	25678000	23174000	28452000	7973700	21602000	9800600	80.9	80.1	79.7
+	2.24659	1.2474	Q9LR30	Q9LR30	4646	GGAT1	Glutamate--glyoxylate aminotransferase 1	glycine biosynthetic process [GO:0006545];L-alanine catabolic process [GO:0042853];photorespiration [GO:0009853];response to hypoxia [GO:0001666]	apoplast [GO:0048046];chloroplast [GO:0009507];cytosol [GO:0005829];nucleus [GO:0005634];peroxisome [GO:0005777];vacuole [GO:0005773]	alanine-glyoxylate transaminase activity [GO:0008453];glycine:2-oxoglutarate aminotransferase activity [GO:0047958];L-alanine:2-oxoglutarate aminotransferase activity [GO:0004021];pyridoxal phosphate binding [GO:0030170]	+	77	77	46	86.1	86.1	62	53.301	0	323.31	1651700000000	2643	1873500000	1804300000	1519900000	1434000000	1983900000	2105200000	1724300000	2040300000	115260000000	100220000000	121060000000	108280000000	77381000000	86132000000	96360000000	92654000000	103620000000	71586000000	109530000000	110680000000	115730000000	110920000000	108710000000	109110000000	67.4	65.5	57.8
+	2.56355	1.24639	Q9FG01	Q9FG01	3927	ATO	Splicing factor SF3a60 homolog	mRNA splicing, via spliceosome [GO:0000398];regulation of embryo sac egg cell differentiation [GO:0045694]	cytosol [GO:0005829];spliceosomal complex [GO:0005681]	RNA binding [GO:0003723];zinc ion binding [GO:0008270]	+	13	13	13	24.4	24.4	24.4	58.971	0	31.725	4959800000	112	666640000	438950000	353740000	317040000	505610000	292590000	386280000	551580000	154290000	119240000	150980000	162070000	70366000	103790000	65679000	67805000	106170000	79402000	88898000	76079000	66528000	34756000	53716000	47617000	16.5	18.1	20.4
+	4.42539	1.24102	Q9SZD6	Q9SZD6	5771	PETs	Polyprotein of EF-Ts, chloroplastic	mitochondrial translational elongation [GO:0070125];response to cadmium ion [GO:0046686];translational elongation [GO:0006414]	chloroplast [GO:0009507];chloroplast envelope [GO:0009941];chloroplast ribosome [GO:0043253];chloroplast stroma [GO:0009570];mitochondrial matrix [GO:0005759];plasma membrane [GO:0005886]	mRNA binding [GO:0003729];polysome binding [GO:1905538];translation elongation factor activity [GO:0003746];translation elongation factor binding [GO:0061770]	+	135	135	135	84.9	84.9	84.9	103.78	0	323.31	560790000000	2391	217150000	240030000	110130000	287640000	286710000	441940000	241460000	325860000	34523000000	31158000000	35656000000	30290000000	26415000000	30251000000	32964000000	33993000000	47289000000	32472000000	47767000000	46725000000	33149000000	31108000000	32336000000	32544000000	13.2	14.5	3.9
+	3.08001	1.24091	Q9SP02	Q9SP02	5511	CYP20-1	Peptidyl-prolyl cis-trans isomerase CYP20-1	protein folding [GO:0006457];protein peptidyl-prolyl isomerization [GO:0000413];root development [GO:0048364]	chloroplast [GO:0009507];cytoplasm [GO:0005737];endoplasmic reticulum [GO:0005783];extracellular region [GO:0005576];intracellular membrane-bounded organelle [GO:0043231];plasmodesma [GO:0009506];plastid [GO:0009536]	cyclosporin A binding [GO:0016018];peptidyl-prolyl cis-trans isomerase activity [GO:0003755]	+	21	17	17	69.1	59.8	59.8	21.961	0	50.607	19641000000	240	745130000	591760000	439150000	448730000	1076000000	1003500000	1103700000	1219800000	704400000	576150000	791240000	609260000	668400000	831990000	811140000	944850000	984480000	760250000	1225200000	1278100000	717790000	692080000	717640000	699920000	59.8	65.2	65.2
+	2.92113	1.24072	Q9LPR4	Q9LPR4	4616	IPMS1	2-isopropylmalate synthase 1, chloroplastic	leucine biosynthetic process [GO:0009098]	chloroplast [GO:0009507];chloroplast stroma [GO:0009570];cytosol [GO:0005829]	2-isopropylmalate synthase activity [GO:0003852]	+	48	47	24	74.6	74.6	39.3	68.675	0	323.31	57071000000	595	2728700000	3023800000	2230000000	2349100000	3653700000	4109000000	3643600000	3950300000	2042400000	1541100000	2364800000	2035200000	1356000000	1671300000	1913100000	1702400000	2782000000	1599600000	3182800000	2756300000	1439300000	1709100000	1706200000	1581000000	69.1	65.5	68.1
+	2.02935	1.23444	Q9FZJ7	Q9FZJ7	4353	At1g27385	At1g27385				+	3	3	3	13.4	13.4	13.4	22.057	0	5.3368	720370000	23	29100000	0	0	0	31182000	0	28869000	50552000	32508000	38152000	40898000	51408000	17692000	23509000	31966000	33397000	49649000	23646000	48569000	47861000	36155000	30180000	35417000	39663000	5.4	0	0
+	3.29639	1.23306	Q9SQI8	Q9SQI8	5517	LTA2	Dihydrolipoyllysine-residue acetyltransferase component 4 of pyruvate dehydrogenase complex, chloroplastic	acetyl-CoA biosynthetic process from pyruvate [GO:0006086];glycolytic process [GO:0006096]	chloroplast [GO:0009507];chloroplast envelope [GO:0009941];chloroplast stroma [GO:0009570];chloroplast thylakoid [GO:0009534];cytosol [GO:0005829];cytosolic ribosome [GO:0022626]	dihydrolipoyllysine-residue acetyltransferase activity [GO:0004742]	+	38	35	35	54.8	54.8	54.8	50.08	0	323.31	49024000000	425	3872800000	4402400000	3577700000	3332700000	5527900000	5858900000	4384800000	4733100000	807350000	838450000	765290000	669860000	704290000	927480000	770080000	675820000	1144100000	713000000	1171300000	1112700000	746550000	824740000	756350000	706500000	53.3	54.8	54.2
+	1.85866	1.23014	Q8LE63	Q8LE63	2909	At4g11860	FAM63A-like protein (DUF544)	protein K48-linked deubiquitination [GO:0071108]	cell periphery [GO:0071944];cytosol [GO:0005829];nucleus [GO:0005634];plasma membrane [GO:0005886]	cysteine-type carboxypeptidase activity [GO:0016807];Lys48-specific deubiquitinase activity [GO:1990380];thiol-dependent ubiquitin-specific protease activity [GO:0004843]	+	18	18	18	30.8	30.8	30.8	74.427	0	78.904	3601700000	119	291950000	249860000	242280000	260020000	296770000	347320000	283790000	289440000	126740000	98124000	133880000	125060000	72528000	87583000	59575000	59840000	99526000	53161000	101330000	57844000	111530000	49005000	55158000	49410000	20.7	17.9	22.3
+	1.82458	1.22874	Q9SAA2	Q9SAA2	5197	CLPP6	ATP-dependent Clp protease proteolytic subunit 6, chloroplastic	protein quality control for misfolded or incompletely synthesized proteins [GO:0006515]	chloroplast stroma [GO:0009570];endopeptidase Clp complex [GO:0009368]	ATPase binding [GO:0051117];ATP-dependent peptidase activity [GO:0004176];serine-type endopeptidase activity [GO:0004252]	+	13	13	13	41.3	41.3	41.3	29.382	0	287.64	34903000000	216	106420000	103580000	57401000	80257000	154750000	208750000	230480000	148270000	2003300000	2369700000	1817200000	2299100000	1801800000	1793600000	1990300000	2268900000	1822400000	1564500000	1965700000	1942800000	2669300000	2624500000	2599300000	2280900000	30.3	21	15.5
+	4.39582	1.22808	Q9LV21	Q9LV21	4760	CCT4	T-complex protein 1 subunit delta	protein folding [GO:0006457];response to cadmium ion [GO:0046686]	chaperonin-containing T-complex [GO:0005832];cytosol [GO:0005829]	ATP binding [GO:0005524];unfolded protein binding [GO:0051082]	+	62	62	61	90.7	90.7	90.7	57.775	0	323.31	65722000000	689	4783500000	5360000000	4706600000	4178800000	6615800000	7374200000	7071400000	6911700000	1719400000	1137800000	1269100000	1208000000	891950000	921120000	906380000	1047300000	1624700000	1187800000	1702800000	1645400000	938540000	768500000	856010000	895620000	86.4	86.8	82.5
+	2.48724	1.22222	Q9C9M1	Q9C9M1	3809	AR401	Protein-lysine N-methyltransferase At1g66680	peptidyl-lysine dimethylation [GO:0018027];peptidyl-lysine monomethylation [GO:0018026]	cytoplasm [GO:0005737];cytosol [GO:0005829];mitochondrion [GO:0005739];nucleus [GO:0005634]	protein-lysine N-methyltransferase activity [GO:0016279]	+	27	27	27	78.2	78.2	78.2	39.229	0	323.31	22987000000	234	2297500000	2399400000	1870300000	1950900000	2879300000	2817900000	2545500000	2821500000	351770000	362670000	380060000	285360000	129090000	180940000	146460000	220630000	211330000	160690000	173050000	176030000	170900000	101900000	173920000	179510000	78.2	73.5	75.7
+	1.37118	1.21874	Q9SQR4	Q9SQR4	5522	At3g03980	NADPH-dependent aldehyde reductase-like protein, chloroplastic		chloroplast [GO:0009507]	oxidoreductase activity [GO:0016491]	+	14	13	11	58.1	58.1	52.6	28.146	0	173.92	10364000000	144	137610000	183880000	137710000	140390000	191710000	145180000	177510000	225510000	574540000	531660000	675710000	563890000	490810000	522530000	474430000	519370000	593970000	489880000	667220000	619760000	648280000	535710000	583490000	533680000	25.6	30.4	24.4
+	1.23818	1.21761	O65469	O65469	1409	CRK9	Putative cysteine-rich receptor-like protein kinase 9	programmed cell death [GO:0012501];response to salicylic acid [GO:0009751];systemic acquired resistance [GO:0009627]	apoplast [GO:0048046];secretory vesicle [GO:0099503]		+	7	7	7	36.2	36.2	36.2	29.722	0	169.8	18520000000	82	0	0	0	0	0	0	0	0	1203000000	994820000	904170000	1133300000	1053500000	921890000	1218000000	1349000000	1263400000	1215500000	1298700000	1362200000	1222900000	891630000	1326000000	1161900000	0	0	0
+	1.21051	1.21353	Q9C7N2	Q9C7N2	3735	CAD1	MACPF domain-containing protein CAD1	cell death [GO:0008219];immune response [GO:0006955];plant-type hypersensitive response [GO:0009626];regulation of salicylic acid metabolic process [GO:0010337]	plasma membrane [GO:0005886]		+	17	17	17	39.4	39.4	39.4	62.222	0	47.727	5398600000	123	397640000	408620000	342460000	328300000	335400000	276290000	268280000	252390000	188480000	222680000	219850000	219640000	163820000	180360000	127400000	188160000	159750000	198010000	167660000	157320000	164550000	109430000	158010000	164120000	31.9	29.8	31
+	3.19261	1.21342	P47924	P47924	1823	RIBA1	Bifunctional riboflavin biosynthesis protein RIBA 1, chloroplastic	riboflavin biosynthetic process [GO:0009231]	chloroplast [GO:0009507];chloroplast stroma [GO:0009570];cytoplasm [GO:0005737]	3,4-dihydroxy-2-butanone-4-phosphate synthase activity [GO:0008686];GTP binding [GO:0005525];GTP cyclohydrolase II activity [GO:0003935];metal ion binding [GO:0046872]	+	21	19	17	38.3	33.9	30.2	59.055	0	52.488	7087900000	152	272030000	302560000	171860000	159040000	327380000	286480000	292870000	298110000	314930000	305580000	282450000	224970000	200200000	300310000	304390000	270520000	475910000	328350000	535720000	515350000	203160000	241550000	286400000	187800000	23.8	25.8	17.3
+	2.21676	1.21069	Q9M5K3	Q9M5K3	5053	LPD1	Dihydrolipoyl dehydrogenase 1, mitochondrial	cell redox homeostasis [GO:0045454];oxidation-reduction process [GO:0055114];response to cadmium ion [GO:0046686]	apoplast [GO:0048046];mitochondrial matrix [GO:0005759];mitochondrial respiratory chain complex I [GO:0005747];mitochondrion [GO:0005739];nucleus [GO:0005634];oxoglutarate dehydrogenase complex [GO:0045252]	ATP binding [GO:0005524];cobalt ion binding [GO:0050897];copper ion binding [GO:0005507];dihydrolipoyl dehydrogenase activity [GO:0004148];flavin adenine dinucleotide binding [GO:0050660];zinc ion binding [GO:0008270]	+	80	80	56	83.4	83.4	78.7	53.987	0	323.31	820080000000	2518	12236000000	14870000000	11262000000	10657000000	14242000000	14042000000	13004000000	13178000000	47754000000	40460000000	53557000000	46586000000	36878000000	41286000000	41902000000	41596000000	45359000000	30020000000	46453000000	46668000000	53829000000	47890000000	48743000000	47611000000	77.5	77.5	82.6
+	3.26998	1.20853	Q93VC7	Q93VC7	3269	RPS1	30S ribosomal protein S1, chloroplastic	translation [GO:0006412]	chloroplast [GO:0009507];chloroplast stroma [GO:0009570];plastid [GO:0009536];ribosome [GO:0005840];thylakoid [GO:0009579]	mRNA binding [GO:0003729];structural constituent of ribosome [GO:0003735]	+	14	14	14	36.5	36.5	36.5	45.11	0	34.931	3934200000	126	26233000	33476000	0	12769000	76161000	112890000	101490000	110540000	400860000	346350000	278020000	293730000	94835000	164050000	186680000	153620000	352900000	284040000	316080000	361020000	57383000	43853000	65218000	61992000	8.2	8.9	0
+	1.90836	1.20518	Q84MA1	Q84MA1	2551	NOP2C	rRNA (cytosine-C(5))-methyltransferase NOP2C	RNA methylation [GO:0001510];rRNA processing [GO:0006364]	nucleolus [GO:0005730]	methyltransferase activity [GO:0008168];RNA binding [GO:0003723]	+	9	9	9	16.9	16.9	16.9	65.512	0	8.8897	1708100000	41	104150000	89649000	99706000	100110000	121190000	135640000	124260000	117910000	38426000	32495000	33870000	28168000	51567000	71588000	48335000	71762000	40313000	28607000	47118000	50258000	84019000	76913000	65746000	46306000	11.4	9.8	9.2
+	1.35372	1.20258	Q9SLF7	Q9SLF7	5469	RPP2B	60S acidic ribosomal protein P2-2	response to cold [GO:0009409];translational elongation [GO:0006414]	chloroplast [GO:0009507];cytosol [GO:0005829];cytosolic ribosome [GO:0022626];nucleolus [GO:0005730];nucleus [GO:0005634];peroxisome [GO:0005777];plasma membrane [GO:0005886];polysomal ribosome [GO:0042788];secretory vesicle [GO:0099503]	structural constituent of ribosome [GO:0003735]	+	12	8	8	83.5	73	73	11.444	0	320.93	8541500000	80	750360000	758930000	477910000	581350000	1215800000	1440100000	1559600000	1508800000	18098000	36988000	34753000	40710000	0	7383200	12226000	0	14018000	14619000	38119000	14657000	7723400	0	0	9314200	81.7	79.1	80.9
+	3.81107	1.20135	B9DG17	B9DG17	442	P40	40S ribosomal protein SA	ribosomal small subunit assembly [GO:0000028];translation [GO:0006412]	cytosolic small ribosomal subunit [GO:0022627]	structural constituent of ribosome [GO:0003735]	+	24	24	18	60.9	60.9	48	31.981	0	323.31	176320000000	791	19179000000	17873000000	14411000000	15018000000	19129000000	20499000000	21637000000	23231000000	1903200000	1478700000	2314400000	1999300000	966240000	1288600000	956260000	1139600000	2518400000	1861400000	2517200000	2420700000	1102100000	1126400000	877500000	873340000	60.9	60.9	60.9
+	1.64739	1.19731	Q9C829	Q9C829	3749	NUP50A	Nuclear pore complex protein NUP50A	intracellular transport [GO:0046907];mRNA transport [GO:0051028];positive regulation of GTPase activity [GO:0043547];protein transport [GO:0015031]	cytoplasm [GO:0005737];cytosol [GO:0005829];nuclear pore [GO:0005643];nucleoplasm [GO:0005654];nucleus [GO:0005634]	Ran GTPase binding [GO:0008536]	+	20	20	20	38.2	38.2	38.2	46.592	0	163.93	10303000000	212	564100000	598470000	374990000	481710000	612150000	1098800000	611890000	708820000	411610000	392490000	462460000	323340000	309820000	363250000	333410000	344310000	292170000	207730000	277660000	435120000	302920000	183570000	291430000	320510000	35.7	34.8	33.4
+	1.94673	1.19501	Q9SJU9	Q9SJU9	5419	GC1	Epimerase family protein SDR39U1 homolog, chloroplastic	chloroplast fission [GO:0010020]	chloroplast [GO:0009507];chloroplast envelope [GO:0009941];chloroplast inner membrane [GO:0009706];plastid [GO:0009536]	oxidoreductase activity [GO:0016491];protein homodimerization activity [GO:0042803]	+	15	15	15	38.6	38.6	38.6	37.745	0	122.78	8956300000	136	0	0	0	0	0	0	0	0	604190000	467720000	619270000	404090000	333730000	533380000	568000000	567010000	600340000	388650000	651050000	744100000	670400000	590340000	607200000	606860000	0	0	0
+	1.99681	1.19431	Q06588	Q06588	2027	ACO4	1-aminocyclopropane-1-carboxylate oxidase 4	cellular response to fatty acid [GO:0071398];defense response [GO:0006952];ethylene biosynthetic process [GO:0009693];fruit ripening [GO:0009835];response to fungus [GO:0009620]	cytosol [GO:0005829];extracellular region [GO:0005576]	1-aminocyclopropane-1-carboxylate oxidase activity [GO:0009815];dioxygenase activity [GO:0051213];L-ascorbic acid binding [GO:0031418];metal ion binding [GO:0046872]	+	30	30	28	86.4	86.4	83	36.676	0	189	45528000000	422	698270000	750610000	716430000	662100000	1019000000	1032500000	899980000	2400400000	2929300000	2776100000	3240100000	2841900000	1661300000	2121200000	2495400000	2553300000	1880000000	1327600000	1911100000	2028500000	2720200000	2070900000	2424500000	2367700000	34.4	33.1	44
+	1.76538	1.18935	Q9LYU8	Q9LYU8	4880	AK1	Aspartokinase 1, chloroplastic	cellular amino acid biosynthetic process [GO:0008652];homoserine biosynthetic process [GO:0009090];lysine biosynthetic process via diaminopimelate [GO:0009089];threonine biosynthetic process [GO:0009088]	chloroplast stroma [GO:0009570];cytoplasm [GO:0005737]	aspartate kinase activity [GO:0004072];ATP binding [GO:0005524]	+	22	22	20	32.9	32.9	32.9	62.297	0	64.974	4858800000	117	354080000	381140000	292020000	345760000	728160000	770570000	559970000	576320000	23258000	35515000	23496000	112140000	31987000	63232000	56609000	52051000	80449000	68235000	76757000	55361000	49590000	51415000	36696000	34018000	27.6	29.2	27.8
+	1.58992	1.1752	P42761	P42761	1781	GSTF10	Glutathione S-transferase F10	glutathione metabolic process [GO:0006749];response to cadmium ion [GO:0046686];response to water deprivation [GO:0009414];toxin catabolic process [GO:0009407]	apoplast [GO:0048046];cell wall [GO:0005618];chloroplast [GO:0009507];cytoplasm [GO:0005737];cytosol [GO:0005829];peroxisome [GO:0005777];plasma membrane [GO:0005886];vacuole [GO:0005773]	copper ion binding [GO:0005507];glutathione binding [GO:0043295];glutathione transferase activity [GO:0004364]	+	26	24	24	62.8	62.8	62.8	24.23	0	323.31	70963000000	463	1725900000	2889200000	1876500000	1908800000	1253300000	2463500000	2116300000	1969400000	3169900000	2593300000	3697400000	3206500000	2916600000	3386100000	3304300000	3352000000	4519500000	2985200000	3859200000	3209700000	3490500000	3858300000	3686400000	3524900000	62.8	60.9	62.8
+	3.24677	1.17503	F4KAB4	F4KAB4	1032	At5g44600	S-adenosyl-L-methionine-dependent methyltransferases superfamily protein	methylation [GO:0032259]		methyltransferase activity [GO:0008168]	+	4	4	4	13.5	13.5	13.5	37.202	0	5.5611	761750000	22	4666100	0	0	0	0	57797000	0	0	49436000	29770000	109180000	37775000	56303000	25682000	61232000	38719000	46224000	27631000	27803000	22001000	11973000	26044000	65209000	64306000	1.8	0	0
+	1.45556	1.16897	Q94C48	Q94C48	3518	WDL5	Protein WVD2-like 5	cellular response to ethylene stimulus [GO:0071369];microtubule bundle formation [GO:0001578]	cytoplasm [GO:0005737];microtubule [GO:0005874]	microtubule binding [GO:0008017]	+	8	7	7	16.2	14.9	14.9	47.542	0	19.032	912500000	58	27102000	33007000	13040000	18435000	79814000	54003000	45124000	22511000	21726000	36677000	41867000	26575000	39409000	24788000	24510000	47804000	64270000	23514000	57667000	48443000	31631000	35400000	38141000	57036000	13.5	10.1	4.8
+	2.81047	1.16804	Q9SRZ6	Q9SRZ6	5569	CICDH	Cytosolic isocitrate dehydrogenase [NADP]	defense response to bacterium [GO:0042742];isocitrate metabolic process [GO:0006102];NADP metabolic process [GO:0006739];response to cadmium ion [GO:0046686];response to zinc ion [GO:0010043];tricarboxylic acid cycle [GO:0006099]	apoplast [GO:0048046];chloroplast stroma [GO:0009570];cytosol [GO:0005829];mitochondrion [GO:0005739];nucleus [GO:0005634];plasma membrane [GO:0005886];plasmodesma [GO:0009506]	copper ion binding [GO:0005507];isocitrate dehydrogenase (NADP+) activity [GO:0004450];magnesium ion binding [GO:0000287];NAD binding [GO:0051287]	+	93	93	77	89.8	89.8	87.3	45.746	0	323.31	1584100000000	3515	86780000000	90857000000	72028000000	73164000000	96097000000	96667000000	92925000000	96201000000	54051000000	47127000000	58409000000	54841000000	41833000000	49161000000	52203000000	52849000000	58146000000	40307000000	60664000000	60792000000	62056000000	62636000000	60301000000	64037000000	89.8	89.8	89.3
+	1.92299	1.16738	Q9C5H4	Q9C5H4	3675	MTV1	Protein MODIFIED TRANSPORT TO THE VACUOLE 1	clathrin-coated vesicle cargo loading [GO:0035652];intracellular protein transport [GO:0006886]	clathrin-coated vesicle [GO:0030136];trans-Golgi network [GO:0005802]	clathrin binding [GO:0030276]	+	16	16	16	23.8	23.8	23.8	74.891	0	41.485	3765200000	109	310860000	120110000	42035000	136030000	226260000	369940000	273390000	313530000	142740000	123870000	169600000	104690000	46072000	30698000	119190000	46497000	199460000	60632000	171400000	222180000	114570000	133940000	128220000	159280000	19.3	15.4	7.4
+	1.84072	1.16461	Q5HZ03	Q5HZ03	2369	MTE17.25	At5g55530				+	11	11	9	32.6	32.6	28.6	44.126	0	42.668	3740600000	57	230230000	317780000	165160000	203230000	311890000	450620000	291770000	373490000	102570000	78584000	81062000	65158000	49922000	68016000	88733000	69052000	119590000	91198000	124030000	119270000	87706000	101150000	88470000	61923000	21.5	21.5	13.8
+	1.92359	1.16395	Q9SW33	Q9SW33	5704	At4g24930	Thylakoid lumenal 17.9 kDa protein, chloroplastic		chloroplast [GO:0009507];chloroplast thylakoid lumen [GO:0009543];cytosol [GO:0005829];thylakoid [GO:0009579];thylakoid lumen [GO:0031977]		+	7	7	7	28.9	28.9	28.9	24.695	0	23.346	1581900000	39	0	0	0	0	0	0	0	0	70410000	68437000	66225000	48088000	147540000	161250000	168010000	150790000	63078000	122670000	84573000	61567000	96370000	94824000	107290000	70774000	0	0	0
+	3.67631	1.15754	Q8RXK8	Q8RXK8	3040	OVA2	Isoleucine--tRNA ligase, chloroplastic/mitochondrial	isoleucyl-tRNA aminoacylation [GO:0006428];mitochondrial translation [GO:0032543];plant ovule development [GO:0048481]	chloroplast [GO:0009507];chloroplast stroma [GO:0009570];mitochondrion [GO:0005739]	aminoacyl-tRNA editing activity [GO:0002161];ATP binding [GO:0005524];isoleucine-tRNA ligase activity [GO:0004822];metal ion binding [GO:0046872];tRNA binding [GO:0000049]	+	49	49	49	48.3	48.3	48.3	123.01	0	219.65	17898000000	387	391100000	454800000	361940000	307490000	693160000	750360000	505380000	522770000	1358000000	1294900000	1524000000	1527900000	756530000	926410000	982820000	949290000	519020000	386320000	508350000	505930000	501120000	624930000	756810000	788490000	23.1	30.2	27.1
+	1.24719	1.15652	Q43307	Q43307	2311	ATS1	Glycerol-3-phosphate acyltransferase, chloroplastic	CDP-diacylglycerol biosynthetic process [GO:0016024];phosphatidylglycerol biosynthetic process [GO:0006655]	chloroplast [GO:0009507];chloroplast stroma [GO:0009570];plastid [GO:0009536]	glycerol-3-phosphate O-acyltransferase activity [GO:0004366];sn-1-glycerol-3-phosphate C16:0-DCA-CoA acyl transferase activity [GO:0102420]	+	34	34	34	73.9	73.9	73.9	50.421	0	323.31	40197000000	437	78017000	74703000	15449000	29428000	39705000	94521000	76046000	49707000	3333500000	3054200000	3390300000	2734900000	1802800000	2102900000	1914700000	2185500000	2810700000	1619700000	2950400000	2592100000	2526300000	2256700000	2387100000	2077000000	19	22.4	8.9
+	1.74414	1.15558	Q8GY46	Q8GY46	2668	At5g13560	At5g13560		cytosol [GO:0005829];plastid [GO:0009536]		+	33	33	33	54.2	54.2	54.2	76.65	0	138.78	8375500000	208	410100000	419960000	392090000	339090000	895220000	863390000	724200000	615270000	221140000	231840000	264320000	334450000	145520000	236580000	136240000	197960000	284680000	276860000	301410000	345260000	186670000	183030000	179050000	191180000	36.8	41.1	39.6
+	1.33833	1.15422	Q9LJE2	Q9LJE2	4506	OVA5	Lysine--tRNA ligase, chloroplastic/mitochondrial	lysyl-tRNA aminoacylation [GO:0006430];plant ovule development [GO:0048481]	chloroplast [GO:0009507];cytosol [GO:0005829];mitochondrion [GO:0005739]	ATP binding [GO:0005524];DNA binding [GO:0003677];lysine-tRNA ligase activity [GO:0004824];metal ion binding [GO:0046872];tRNA binding [GO:0000049]	+	32	32	32	49	49	49	67.587	0	174.92	9441500000	276	92676000	40761000	32057000	25782000	108720000	53830000	74532000	132330000	651070000	591320000	670140000	601250000	337730000	453370000	463400000	497640000	693220000	641170000	643330000	688950000	505980000	453740000	511450000	477030000	17.4	10.3	6.3
+	3.21873	1.15315	O49195	O49195	1306	VSP1	Vegetative storage protein 1	defense response [GO:0006952];response to jasmonic acid [GO:0009753]	vacuole [GO:0005773]	acid phosphatase activity [GO:0003993];nutrient reservoir activity [GO:0045735];transcription factor binding [GO:0008134]	+	9	9	5	31.5	31.5	14.8	30.261	0	88.954	1576300000	61	8818600	42850000	0	0	220340000	132500000	80875000	206310000	35012000	43937000	29303000	15747000	57597000	53906000	49065000	50600000	112310000	104020000	98484000	113680000	19837000	25031000	37649000	38440000	8.1	4.1	0
+	1.89671	1.14961	O81014	O81014	1509	ISPE	4-diphosphocytidyl-2-C-methyl-D-erythritol kinase, chloroplastic	isopentenyl diphosphate biosynthetic process, methylerythritol 4-phosphate pathway [GO:0019288];terpenoid biosynthetic process [GO:0016114]	chloroplast [GO:0009507];chloroplast stroma [GO:0009570]	4-(cytidine 5'-diphospho)-2-C-methyl-D-erythritol kinase activity [GO:0050515];ATP binding [GO:0005524]	+	28	28	28	41.8	41.8	41.8	42.042	0	221.35	34986000000	378	27254000	34112000	50345000	10705000	173500000	45984000	50486000	64442000	2296100000	2230600000	3068600000	2581500000	1711100000	1498700000	1545800000	1834600000	2603400000	1561600000	2383900000	2779200000	2230600000	1638600000	2252000000	2313000000	16.7	18.8	11.7
+	1.80237	1.13383	Q8L5R3	Q8L5R3	2767	TFCD	Tubulin-folding cofactor D	embryo development ending in seed dormancy [GO:0009793];microtubule cytoskeleton organization [GO:0000226];microtubule-based process [GO:0007017];post-chaperonin tubulin folding pathway [GO:0007023];protein folding [GO:0006457];tubulin complex assembly [GO:0007021]	cytosol [GO:0005829];plasmodesma [GO:0009506]	beta-tubulin binding [GO:0048487];GTPase activator activity [GO:0005096];tubulin binding [GO:0015631]	+	30	30	30	27.1	27.1	27.1	139.91	0	63.589	2845000000	79	199670000	294680000	221160000	232280000	521490000	425470000	386740000	436450000	4022900	331990	19687000	4253400	2590900	0	12346000	18358000	21719000	6057900	4520900	12568000	607080	9893900	662370	9424500	11.5	20	15.5
+	3.26492	1.1336	Q9CAD1	Q9CAD1	3836	At1g63660	At1g63660	glutamine metabolic process [GO:0006541];GMP biosynthetic process [GO:0006177]	cytosol [GO:0005829]	ATP binding [GO:0005524];GMP synthase (glutamine-hydrolyzing) activity [GO:0003922];GMP synthase activity [GO:0003921];pyrophosphatase activity [GO:0016462];transferase activity [GO:0016740]	+	49	49	49	79.6	79.6	79.6	59.314	0	323.31	51850000000	494	4136200000	3776700000	3648600000	3433800000	4801400000	5538000000	5140200000	4844000000	1079000000	1075600000	880330000	880290000	793630000	914060000	1030400000	896280000	1316000000	1030400000	1425500000	1164200000	1094500000	1023000000	1008500000	918800000	79.4	66.3	68.4
+	1.41026	1.1311	Q5QIT3	Q5QIT3	2377	B''BETA	Serine/threonine protein phosphatase 2A regulatory subunit B''beta	protein dephosphorylation [GO:0006470]	cytosol [GO:0005829];protein phosphatase type 2A complex [GO:0000159]	calcium ion binding [GO:0005509];protein phosphatase regulator activity [GO:0019888]	+	28	28	20	50.4	50.4	38.2	61.977	0	142.76	24802000000	211	2095200000	2060400000	1508800000	1567500000	2082800000	2080000000	2501900000	2292900000	1193200000	657550000	380130000	875550000	628500000	464240000	676220000	796580000	215900000	344220000	284650000	525590000	679410000	350740000	229570000	310720000	45	39.7	36.8
+	2.46185	1.12967	Q8LBZ7	Q8LBZ7	2875	SDH2-1	Succinate dehydrogenase [ubiquinone] iron-sulfur subunit 1, mitochondrial	aerobic respiration [GO:0009060];mitochondrial electron transport, succinate to ubiquinone [GO:0006121];respiratory electron transport chain [GO:0022904];tricarboxylic acid cycle [GO:0006099]	cytosol [GO:0005829];mitochondrial inner membrane [GO:0005743];mitochondrion [GO:0005739];respiratory chain complex II [GO:0045273];succinate dehydrogenase complex [GO:0045281]	2 iron, 2 sulfur cluster binding [GO:0051537];3 iron, 4 sulfur cluster binding [GO:0051538];4 iron, 4 sulfur cluster binding [GO:0051539];electron transfer activity [GO:0009055];succinate dehydrogenase (ubiquinone) activity [GO:0008177];succinate dehydrogenase activity [GO:0000104];zinc ion binding [GO:0008270]	+	22	22	4	58.4	58.4	15.8	31.171	0	148.77	14532000000	217	594770000	535840000	373900000	351510000	1045400000	962580000	1116700000	1078900000	508530000	461530000	369380000	407440000	291730000	415130000	460460000	434110000	963110000	581300000	896980000	902360000	531270000	473570000	450930000	324120000	48.7	48.4	33
+	2.59123	1.12779	Q9FIQ0	Q9FIQ0	4031	AGD9	Probable ADP-ribosylation factor GTPase-activating protein AGD9	COPI coating of Golgi vesicle [GO:0048205];response to abscisic acid [GO:0009737]	Golgi membrane [GO:0000139];plastid [GO:0009536]	GTPase activator activity [GO:0005096];metal ion binding [GO:0046872]	+	18	18	12	51	51	39.1	43.55	0	183.02	83449000000	190	663630000	644940000	481010000	584050000	601710000	701760000	671340000	556320000	5250500000	6611500000	5872400000	6387400000	562450000	5409900000	4287100000	4834300000	4874200000	3005600000	4460500000	6308800000	4150400000	5257700000	4833200000	6438100000	41.8	33.6	26.9
+	2.93875	1.12642	O65902	O65902	1427	CAP1	Cyclase-associated protein 1	actin cytoskeleton organization [GO:0030036];actin polymerization or depolymerization [GO:0008154];cell morphogenesis [GO:0000902];establishment or maintenance of cell polarity [GO:0007163];regulation of adenylate cyclase activity [GO:0045761];unidimensional cell growth [GO:0009826]	cortical actin cytoskeleton [GO:0030864];cytosol [GO:0005829]	actin binding [GO:0003779];adenylate cyclase binding [GO:0008179]	+	64	64	64	88	88	88	50.969	0	323.31	106070000000	802	6499700000	8176100000	6962500000	6689700000	9662500000	9945500000	8377200000	9412300000	2804900000	2588000000	2968000000	2683800000	2199500000	2546300000	2748400000	2577400000	1972100000	1744700000	2182900000	2163200000	2826400000	2914400000	2671900000	2748100000	83.8	85.7	81.1
+	1.27798	1.11832	Q94CD1	Q94CD1	3528	HHT1	Omega-hydroxypalmitate O-feruloyl transferase	cell wall pectin biosynthetic process [GO:0052325];suberin biosynthetic process [GO:0010345]		hydroxycinnamoyltransferase activity [GO:0050734];omega-hydroxypalmitate O-sinapoyl transferase activity [GO:0102406]	+	38	36	36	68.9	65	65	50.957	0	310.45	18414000000	214	2373600000	2234900000	2090000000	1974100000	2571900000	2388700000	2353100000	2383100000	0	5629400	0	0	0	0	0	0	0	4512100	29021000	5111100	0	0	0	0	64.6	63.5	54.3
+	1.35723	1.10746	F4JTI1	F4JTI1	928	PHOX4	Protein PHOX4		vacuole [GO:0005773]		+	26	26	26	35	35	35	87.974	0	134.19	6197600000	121	695160000	757640000	633800000	677470000	631910000	770070000	833280000	873660000	44949000	8695500	17093000	6771800	32019000	18607000	26065000	3943200	57195000	33305000	30579000	23178000	0	7169500	8967600	6042200	29.9	27.7	32.6
+	2.04527	1.10716	Q8L6Y1	Q8L6Y1	2783	UBP14	Ubiquitin carboxyl-terminal hydrolase 14	embryo development ending in seed dormancy [GO:0009793];protein deubiquitination [GO:0016579];root hair elongation [GO:0048767];ubiquitin-dependent protein catabolic process [GO:0006511]	cytosol [GO:0005829];nucleus [GO:0005634]	cysteine-type endopeptidase activity [GO:0004197];thiol-dependent ubiquitin-specific protease activity [GO:0004843];zinc ion binding [GO:0008270]	+	60	60	59	56.3	56.3	56.3	88.373	0	323.31	47066000000	634	4731700000	5047600000	3790200000	3433100000	4430400000	4711500000	3733700000	4093100000	803280000	732230000	891310000	737000000	661690000	822900000	761990000	775890000	939500000	676740000	930900000	1084000000	788110000	810540000	875570000	803250000	52.4	56.3	56.3
+	2.94994	1.09751	F4JEL5	F4JEL5	837	EIF4A1	Eukaryotic translation initiation factor 4A1			ATP binding [GO:0005524];helicase activity [GO:0004386];translation initiation factor activity [GO:0003743]	+	52	52	12	82.3	82.3	32.4	46.136	0	323.31	265300000000	1226	22058000000	22671000000	19992000000	20511000000	30779000000	30969000000	27973000000	30351000000	4463400000	4492400000	5126000000	4774700000	2534700000	2724300000	3017600000	3106500000	4301700000	3107900000	4958500000	5075500000	3151500000	3130600000	2986300000	3050100000	81.1	81.6	79.1
+	1.88893	1.09659	Q940P8	Q940P8	3389	CCT2	T-complex protein 1 subunit beta	protein folding [GO:0006457]	anchored component of plasma membrane [GO:0046658];cell wall [GO:0005618];chaperonin-containing T-complex [GO:0005832];cytosol [GO:0005829];plastid [GO:0009536]	ATP binding [GO:0005524];unfolded protein binding [GO:0051082]	+	67	67	67	87.3	87.3	87.3	57.285	0	323.31	103190000000	833	7481000000	10065000000	6879500000	6140900000	12246000000	13446000000	12197000000	12593000000	3167200000	1353100000	1417900000	1304500000	615960000	816390000	874820000	824840000	1256300000	811360000	3045300000	3306400000	836610000	748940000	869010000	889010000	87.3	82.4	83.5
+	4.71896	1.08231	Q9LTX9	Q9LTX9	4728	HSP70-7	Heat shock 70 kDa protein 7, chloroplastic	cellular response to unfolded protein [GO:0034620];chaperone cofactor-dependent protein refolding [GO:0051085];protein refolding [GO:0042026];protein targeting to chloroplast [GO:0045036];response to cadmium ion [GO:0046686];response to heat [GO:0009408];response to unfolded protein [GO:0006986]	apoplast [GO:0048046];chloroplast [GO:0009507];chloroplast envelope [GO:0009941];chloroplast stroma [GO:0009570];cytoplasm [GO:0005737];plastid [GO:0009536];plastid stroma [GO:0009532];thylakoid [GO:0009579]	ATP binding [GO:0005524];ATPase activity [GO:0016887];heat shock protein binding [GO:0031072];misfolded protein binding [GO:0051787];protein folding chaperone [GO:0044183];unfolded protein binding [GO:0051082]	+	100	44	44	71	39.6	39.6	76.996	0	323.31	244120000000	1041	1930200000	2024800000	1612400000	1624500000	2277000000	2042100000	1950900000	2195300000	22442000000	18786000000	22120000000	19626000000	10248000000	11505000000	12993000000	12339000000	13914000000	9892400000	13740000000	13407000000	13180000000	12364000000	11187000000	10717000000	63.8	62.3	63.5
+	1.76034	1.07413	Q9FHU3	Q9FHU3	3988	CIP4	COP1-interacting protein 4	regulation of photomorphogenesis [GO:0010099]	nucleus [GO:0005634]	transcription coregulator activity [GO:0003712]	+	2	2	2	4.2	4.2	4.2	95.38	1	-2	3333800000	2	0	0	26354000	0	0	0	0	0	233250000	245340000	206620000	193150000	156080000	167360000	190570000	199500000	262510000	276410000	253450000	246080000	204930000	163930000	149420000	158900000	0	0	2.2
+	3.63017	1.07127	Q6NQA8	Q6NQA8	2472	APY5	Probable apyrase 5		integral component of membrane [GO:0016021];vacuole [GO:0005773]	8-oxo-dGTP phosphohydrolase activity [GO:0102490];ATP binding [GO:0005524];dATP phosphohydrolase activity [GO:0102485];dCTP phosphohydrolase activity [GO:0102486];dGTP phosphohydrolase activity [GO:0102491];dTTP phosphohydrolase activity [GO:0102488];dUTP phosphohydrolase activity [GO:0102487];GTP phosphohydrolase activity [GO:0102489]	+	18	18	16	39.8	39.8	38.1	53.504	0	117.07	4166900000	81	78215000	81328000	16025000	8720200	0	0	20177000	24616000	118370000	125030000	234510000	242780000	161160000	217040000	191140000	153810000	552460000	365870000	563390000	554290000	126870000	122970000	106270000	101910000	1.6	1.6	1.2
+	4.3731	1.06703	Q9SF16	Q9SF16	5281	CCT7	T-complex protein 1 subunit eta	protein folding [GO:0006457];response to cadmium ion [GO:0046686]	chaperonin-containing T-complex [GO:0005832];cytosol [GO:0005829]	ATP binding [GO:0005524];unfolded protein binding [GO:0051082]	+	53	53	53	89.2	89.2	89.2	59.776	0	323.31	104290000000	831	8334800000	8966900000	6484200000	6718500000	11420000000	9522200000	9486900000	9825100000	2417500000	2052700000	2385700000	2297000000	1340500000	1744300000	1811400000	1830700000	2718500000	2039100000	2706800000	2911000000	1799100000	1894400000	1687800000	1897800000	86.2	86.9	76.5
+	6.14209	1.06563	Q9C5R8	Q9C5R8	3688	At5g06290	2-Cys peroxiredoxin BAS1-like, chloroplastic	cell redox homeostasis [GO:0045454];defense response to bacterium [GO:0042742];response to cold [GO:0009409];response to oxidative stress [GO:0006979]	apoplast [GO:0048046];chloroplast [GO:0009507];chloroplast stroma [GO:0009570];plasma membrane [GO:0005886];stromule [GO:0010319]	peroxiredoxin activity [GO:0051920];thioredoxin peroxidase activity [GO:0008379]	+	23	13	13	59.3	28.2	28.2	29.78	0	323.31	61703000000	198	0	0	0	2663600	0	0	0	0	4746600000	5523500000	6414500000	5647000000	2686200000	2936900000	3088900000	2995500000	3349800000	2394000000	3507000000	3769500000	3971400000	3521800000	3225200000	3922400000	29.3	27.5	28.2
+	1.48747	1.06438	Q94BV4	Q94BV4	3512	RH6	DEAD-box ATP-dependent RNA helicase 6	cytoplasmic mRNA processing body assembly [GO:0033962];mRNA processing [GO:0006397];mRNA transport [GO:0051028];regulation of translation [GO:0006417];stress granule assembly [GO:0034063]	cytoplasmic stress granule [GO:0010494];cytosol [GO:0005829];P-body [GO:0000932]	ATP binding [GO:0005524];mRNA binding [GO:0003729];RNA binding [GO:0003723];RNA helicase activity [GO:0003724]	+	21	9	7	42	21	15.7	60.42	0	34.465	3311600000	74	101730000	96447000	151120000	89980000	219350000	175760000	147310000	153800000	274240000	148360000	148740000	176680000	114700000	135570000	86865000	70237000	277570000	101310000	136230000	141920000	96507000	41883000	34980000	190270000	23.1	19.3	23.7
+	1.50797	1.0606	Q94K05	Q94K05	3566	CCT8	T-complex protein 1 subunit theta	positive regulation of transport [GO:0051050];protein folding [GO:0006457]	chaperonin-containing T-complex [GO:0005832];cytoplasm [GO:0005737];cytosol [GO:0005829];plasmodesma [GO:0009506]	ATP binding [GO:0005524];protein folding chaperone [GO:0044183];unfolded protein binding [GO:0051082]	+	55	55	55	88.5	88.5	88.5	58.939	0	323.31	77806000000	670	6249200000	6968300000	5939300000	5495100000	9009700000	9787800000	8412800000	9142400000	1332700000	1163600000	1120700000	818900000	971790000	835250000	777320000	880070000	1328700000	1207500000	1340200000	1509100000	1048700000	869830000	796990000	800270000	79.1	80.9	76.3
+	1.65776	1.05987	P42645	P42645	1764	GRF5	14-3-3-like protein GF14 upsilon	response to cadmium ion [GO:0046686]	cell wall [GO:0005618];cytosol [GO:0005829];Golgi apparatus [GO:0005794];mitochondrion [GO:0005739];nucleus [GO:0005634];plasma membrane [GO:0005886];plastid [GO:0009536]	ATP binding [GO:0005524]	+	30	9	9	85.1	39.9	39.9	30.182	0	105.76	5243300000	78	301760000	297140000	367770000	236180000	554030000	642450000	465300000	459680000	65730000	73442000	98912000	71938000	115650000	127360000	136930000	125450000	173750000	125550000	202030000	129590000	104770000	84283000	126400000	157180000	76.5	76.5	76.5
+	1.652	1.05751	F4JSM3	F4JSM3	920	ABCB28	Non-intrinsic ABC protein 8		integral component of membrane [GO:0016021]	ATP binding [GO:0005524];ATPase activity [GO:0016887];ATPase-coupled transmembrane transporter activity [GO:0042626]	+	6	6	6	14.7	14.7	14.7	59.245	0	7.5798	1033800000	25	0	15389000	17568000	21114000	12476000	16499000	15432000	0	42926000	36357000	82610000	38068000	50106000	65797000	86554000	65975000	18210000	66012000	63995000	89684000	58844000	40132000	89014000	41038000	0	1.5	1.5
+	1.79216	1.05682	Q9SSS9	Q9SSS9	5598	ATPD	ATP synthase subunit delta, chloroplastic	ATP synthesis coupled proton transport [GO:0015986];defense response to bacterium [GO:0042742];photosynthesis [GO:0015979];photosynthetic electron transport in photosystem I [GO:0009773];photosynthetic electron transport in photosystem II [GO:0009772];response to cold [GO:0009409]	chloroplast [GO:0009507];chloroplast envelope [GO:0009941];chloroplast thylakoid [GO:0009534];chloroplast thylakoid membrane [GO:0009535];cytosol [GO:0005829];plastoglobule [GO:0010287];proton-transporting ATP synthase complex, catalytic core F(1) [GO:0045261];stromule [GO:0010319];thylakoid [GO:0009579]	proton-transporting ATP synthase activity, rotational mechanism [GO:0046933]	+	31	31	31	71.8	71.8	71.8	25.668	0	323.31	43781000000	279	0	0	151380000	109040000	81002000	0	0	335360000	2537900000	2331000000	2939800000	2507300000	1434000000	2024200000	2133000000	2126500000	4396000000	3735900000	4647800000	5195600000	1665700000	1937500000	2003400000	1488600000	0	0	17.9
+	1.33878	1.05479	Q8VYV9	Q8VYV9	3151	APF1	Aspartyl protease family protein 1	protein catabolic process [GO:0030163];proteolysis [GO:0006508]	anchored component of membrane [GO:0031225];plasma membrane [GO:0005886]	aspartic-type endopeptidase activity [GO:0004190]	+	6	6	6	12.9	12.9	12.9	56.027	0	23.024	1904600000	62	106500000	117430000	74544000	96080000	117440000	130970000	138100000	108670000	125020000	104390000	57306000	104980000	30659000	40770000	40464000	35422000	93038000	30885000	109140000	104780000	64964000	29253000	38886000	4881100	12.9	12.9	7.4
+	3.72677	1.05473	Q9STW6	Q9STW6	5617	HSP70-6	Heat shock 70 kDa protein 6, chloroplastic	cellular response to unfolded protein [GO:0034620];chaperone cofactor-dependent protein refolding [GO:0051085];protein refolding [GO:0042026];protein targeting to chloroplast [GO:0045036];response to cadmium ion [GO:0046686];response to cold [GO:0009409];response to heat [GO:0009408];response to unfolded protein [GO:0006986];viral process [GO:0016032]	chloroplast [GO:0009507];chloroplast envelope [GO:0009941];chloroplast stroma [GO:0009570];cytoplasm [GO:0005737];cytosol [GO:0005829];mitochondrion [GO:0005739];nucleus [GO:0005634];thylakoid [GO:0009579]	ATP binding [GO:0005524];ATPase activity [GO:0016887];heat shock protein binding [GO:0031072];misfolded protein binding [GO:0051787];protein folding chaperone [GO:0044183];unfolded protein binding [GO:0051082]	+	100	100	44	71	71	41.2	76.507	0	323.31	1131300000000	2984	11678000000	12556000000	9936300000	10343000000	13962000000	14854000000	15020000000	14757000000	89866000000	83435000000	94175000000	84685000000	49927000000	55019000000	56624000000	56815000000	58143000000	44587000000	59677000000	62467000000	60897000000	58942000000	56202000000	56777000000	63.6	68.8	63.4
+	2.00239	1.04184	Q9SEU8;F4JG94	Q9SEU8;F4JG94	5277	TRXM2;ATHM2	Thioredoxin M2, chloroplastic;Thioredoxin superfamily protein	cell redox homeostasis [GO:0045454];glycerol ether metabolic process [GO:0006662];positive regulation of catalytic activity [GO:0043085]	chloroplast [GO:0009507];chloroplast stroma [GO:0009570];chloroplast thylakoid membrane [GO:0009535];cytoplasm [GO:0005737];cytosol [GO:0005829];thylakoid [GO:0009579]	enzyme activator activity [GO:0008047];oxidoreductase activity, acting on a sulfur group of donors, disulfide as acceptor [GO:0016671];protein disulfide oxidoreductase activity [GO:0015035];protein-disulfide reductase activity [GO:0047134]	+	14	14	14	48.4	48.4	48.4	20.312	0	323.31	40430000000	229	198310000	190890000	164660000	133040000	276210000	246500000	316810000	298450000	2523900000	2645500000	3085900000	2915600000	2352000000	2221900000	2113800000	2289700000	2462900000	1902900000	2399300000	2267000000	2272100000	2413500000	2393800000	2345200000	36	30.6	27.4
+	1.4136	1.04158	Q9SJZ7	Q9SJZ7	5424	DJA6	Chaperone protein dnaJ A6, chloroplastic	chaperone cofactor-dependent protein refolding [GO:0051085];protein refolding [GO:0042026];response to heat [GO:0009408]	chloroplast [GO:0009507];chloroplast envelope [GO:0009941];chloroplast thylakoid membrane [GO:0009535];cytoplasm [GO:0005737];vacuole [GO:0005773]	ATP binding [GO:0005524];heat shock protein binding [GO:0031072];metal ion binding [GO:0046872];unfolded protein binding [GO:0051082]	+	6	6	4	16.5	16.5	13.1	47.761	0	11.593	475050000	19	18822000	35312000	4243400	0	28022000	13506000	40754000	3745200	23145000	5746300	26229000	16750000	15586000	19272000	20596000	16429000	25274000	18315000	24789000	72568000	3215500	0	10986000	31747000	7	8.8	3.4
+	2.56915	1.04042	Q9S7C0	Q9S7C0	5146	HSP70-14	Heat shock 70 kDa protein 14	response to cadmium ion [GO:0046686];response to heat [GO:0009408]	cytoplasm [GO:0005737];cytosol [GO:0005829];mitochondrion [GO:0005739];nucleus [GO:0005634];plasma membrane [GO:0005886]	ATP binding [GO:0005524]	+	121	121	30	91.8	91.8	39	91.749	0	323.31	405280000000	2336	29735000000	30683000000	24301000000	24285000000	32220000000	32599000000	30284000000	31456000000	11452000000	9201500000	12051000000	10910000000	8544400000	9432700000	10070000000	10340000000	11964000000	8980800000	12283000000	12196000000	11038000000	10047000000	10385000000	10824000000	91.5	90.3	90
+	1.2471	1.03275	Q9SGH4	Q9SGH4	5311	PNSL3	Photosynthetic NDH subunit of lumenal location 3, chloroplastic	photosynthesis, light reaction [GO:0019684];photosynthetic electron transport chain [GO:0009767]	chloroplast [GO:0009507];chloroplast thylakoid [GO:0009534];chloroplast thylakoid membrane [GO:0009535];cytosol [GO:0005829];extrinsic component of membrane [GO:0019898];nitrite reductase complex [NAD(P)H] [GO:0009344];photosystem II oxygen evolving complex [GO:0009654]	calcium ion binding [GO:0005509];electron transporter, transferring electrons within the cyclic electron transport pathway of photosynthesis activity [GO:0045156]	+	3	3	3	14.1	14.1	14.1	24.781	0.0014856	2.2697	602850000	14	0	5141400	3338400	0	0	0	0	0	48275000	40725000	34688000	32548000	29690000	27366000	52912000	51365000	14842000	17576000	40718000	30761000	41436000	52447000	39943000	39083000	0	3.2	3.2
+	1.65234	1.02972	Q8VZ38	Q8VZ38	3165	A_TM018A10.12	TRAF-like family protein				+	3	3	3	14.4	14.4	14.4	34.323	0	3.7265	486000000	12	6929500	11586000	8059600	0	11300000	7836700	0	29173000	20138000	54415000	24356000	45011000	17455000	10985000	22334000	38237000	37150000	5669100	30134000	42222000	23207000	11199000	20152000	8449200	3.3	3.3	3.3
+	2.19156	1.02837	O49203	O49203	1308	NDPK3	Nucleoside diphosphate kinase III, chloroplastic/mitochondrial	CTP biosynthetic process [GO:0006241];GTP biosynthetic process [GO:0006183];purine nucleotide metabolic process [GO:0006163];pyrimidine nucleotide metabolic process [GO:0006220];response to oxidative stress [GO:0006979];UTP biosynthetic process [GO:0006228]	chloroplast thylakoid lumen [GO:0009543];cytosol [GO:0005829];mitochondrial inner membrane [GO:0005743];mitochondrial intermembrane space [GO:0005758];mitochondrion [GO:0005739];plastid [GO:0009536]	ATP binding [GO:0005524];cobalt ion binding [GO:0050897];nucleoside diphosphate kinase activity [GO:0004550];zinc ion binding [GO:0008270]	+	24	24	16	48.7	48.7	36.6	25.734	0	323.31	219410000000	669	10095000000	11378000000	8051100000	8125200000	13425000000	11936000000	11173000000	12976000000	7968300000	7050400000	8379700000	6530900000	6408300000	7813700000	9075300000	8404900000	8805300000	6236200000	9828600000	8523300000	9312700000	10068000000	9509900000	8330800000	48.7	48.7	48.7
+	2.10419	1.02812	P27140	P27140	1691	BCA1	Beta carbonic anhydrase 1, chloroplastic	carbon utilization [GO:0015976];cyanate catabolic process [GO:0009440];defense response to bacterium [GO:0042742];defense response to fungus, incompatible interaction [GO:0009817];negative regulation of stomatal complex development [GO:2000122];photosynthesis [GO:0015979];regulation of stomatal movement [GO:0010119];response to carbon dioxide [GO:0010037];response to cold [GO:0009409]	apoplast [GO:0048046];chloroplast [GO:0009507];chloroplast envelope [GO:0009941];chloroplast stroma [GO:0009570];chloroplast thylakoid membrane [GO:0009535];cytosol [GO:0005829];plasma membrane [GO:0005886];stromule [GO:0010319];thylakoid [GO:0009579]	carbonate dehydratase activity [GO:0004089];zinc ion binding [GO:0008270]	+	57	4	4	75.8	10.4	10.4	37.449	0	57.967	15207000000	85	0	0	0	0	0	0	0	0	1286100000	951170000	1383000000	1360800000	785630000	829420000	894290000	800130000	1002200000	702100000	901310000	1046100000	952980000	792040000	804180000	716000000	30.8	25.6	22.5
+	1.98358	1.02139	Q9SIF2	Q9SIF2	5360	HSP90-5	Heat shock protein 90-5, chloroplastic	de-etiolation [GO:0009704];protein folding [GO:0006457];protein import into chloroplast stroma [GO:0045037];response to chlorate [GO:0010157];response to heat [GO:0009408];response to salt stress [GO:0009651];response to water deprivation [GO:0009414]	chloroplast [GO:0009507];chloroplast envelope [GO:0009941];chloroplast stroma [GO:0009570];mitochondrion [GO:0005739];plastid [GO:0009536];vacuolar membrane [GO:0005774]	ATP binding [GO:0005524];protein homodimerization activity [GO:0042803];unfolded protein binding [GO:0051082]	+	103	102	96	82.1	80.9	76.5	88.662	0	323.31	249260000000	2056	10701000000	10263000000	8591600000	9238100000	11478000000	11913000000	11799000000	12039000000	10323000000	10883000000	12781000000	11595000000	6581900000	8743600000	9018300000	9075400000	12089000000	7500400000	12661000000	12102000000	10440000000	9614800000	10168000000	9658700000	77.8	78.5	77.4
+	1.68003	1.01487	Q9SN73	Q9SN73	5500	BSD2	Protein BUNDLE SHEATH DEFECTIVE 2, chloroplastic	chaperone-mediated protein folding [GO:0061077];chloroplast ribulose bisphosphate carboxylase complex assembly [GO:0110102]	chaperone complex [GO:0101031];chloroplast [GO:0009507];chloroplast stroma [GO:0009570];cytosol [GO:0005829]	metal ion binding [GO:0046872];polysome binding [GO:1905538];protein folding chaperone [GO:0044183]	+	4	4	4	33.1	33.1	33.1	14.546	0	50.171	2577900000	37	0	0	0	0	0	0	10564000	0	310530000	292630000	225200000	324510000	100700000	144710000	168030000	126360000	191050000	98016000	136120000	104130000	118120000	98390000	80495000	48308000	0	0	0
+	2.43494	1.01219	Q9SE45	Q9SE45	5265	ANN3	Annexin D3	response to cold [GO:0009409];response to heat [GO:0009408];response to salt stress [GO:0009651];response to water deprivation [GO:0009414]	cytoplasm [GO:0005737];vacuole [GO:0005773]	calcium ion binding [GO:0005509];calcium-dependent phospholipid binding [GO:0005544]	+	3	3	3	9.7	9.7	9.7	36.255	0	4.295	1233200000	18	0	0	0	0	4761700	28700000	23320000	21530000	56226000	69614000	72439000	77652000	80087000	77840000	82383000	98759000	50454000	62463000	39467000	63053000	75813000	84174000	81872000	82550000	0	0	0
+	4.76917	1.00829	Q84WV1	Q84WV1	2598	CCT3	T-complex protein 1 subunit gamma	protein folding [GO:0006457]	chaperonin-containing T-complex [GO:0005832];cytosol [GO:0005829];plastid [GO:0009536]	ATP binding [GO:0005524];unfolded protein binding [GO:0051082]	+	70	70	70	95.7	95.7	95.7	60.339	0	323.31	112500000000	841	8057400000	10573000000	7574600000	8109300000	12316000000	13805000000	13432000000	13115000000	2096600000	1657900000	2297500000	1951000000	846980000	1328300000	1285300000	1363700000	2005000000	1373400000	2073400000	2059800000	1196700000	1238800000	1231500000	1513700000	90.1	93.9	93
+	3.08307	1.00115	Q9LJR2	Q9LJR2	4521	LEC	Lectin-like protein LEC	cellular response to chitin [GO:0071323];cellular response to ethylene stimulus [GO:0071369];cellular response to jasmonic acid stimulus [GO:0071395];defense response to fungus, incompatible interaction [GO:0009817];ethylene-activated signaling pathway [GO:0009873];response to wounding [GO:0009611]	apoplast [GO:0048046];cell wall [GO:0005618];cytosol [GO:0005829]	carbohydrate binding [GO:0030246]	+	26	19	19	75.3	59.8	59.8	29.749	0	323.31	122380000000	417	64118000	38836000	36806000	23192000	134320000	99275000	101440000	83836000	13166000000	12192000000	10664000000	11734000000	5771300000	5828900000	6878600000	6857700000	6064000000	5407900000	6255800000	5492000000	5980100000	6339200000	6664500000	6500300000	15.1	7.4	7.4
+	1.50526	0.997869	Q9FID9	Q9FID9	4013	At5g38990	Probable receptor-like protein kinase At5g38990	protein autophosphorylation [GO:0046777];response to metal ion [GO:0010038]	integral component of membrane [GO:0016021];plasma membrane [GO:0005886];plasmodesma [GO:0009506];plastid [GO:0009536]	ATP binding [GO:0005524];protein kinase activity [GO:0004672];protein serine/threonine kinase activity [GO:0004674]	+	8	8	7	8.8	8.8	7.7	97.952	0	25.671	2196500000	42	0	0	0	0	18170000	0	0	0	65235000	93761000	82274000	94782000	154580000	142510000	155630000	196420000	136510000	99816000	137050000	154530000	170270000	106950000	190320000	197680000	0	0	0
+	2.22063	0.988997	Q94FY7	Q94FY7	3549	VTE1	Tocopherol cyclase, chloroplastic	chlorophyll metabolic process [GO:0015994];fatty acid metabolic process [GO:0006631];phloem sucrose loading [GO:0009915];regulation of defense response [GO:0031347];response to high light intensity [GO:0009644];response to oxidative stress [GO:0006979];response to temperature stimulus [GO:0009266];vitamin E biosynthetic process [GO:0010189];xanthophyll metabolic process [GO:0016122]	chloroplast [GO:0009507];chloroplast envelope [GO:0009941];chloroplast inner membrane [GO:0009706];chloroplast thylakoid [GO:0009534];plasma membrane [GO:0005886];plastoglobule [GO:0010287]	isomerase activity [GO:0016853];tocopherol cyclase activity [GO:0009976]	+	26	26	26	48.8	48.8	48.8	54.72	0	223.38	20616000000	233	20167000	42859000	0	14167000	40467000	47542000	54012000	23634000	1062500000	888140000	1241900000	1167700000	1058900000	1213200000	1376200000	1234300000	1537400000	1039900000	1528700000	1551600000	1474100000	1407500000	1308900000	1282300000	6.1	9.4	0
+	1.36505	0.985608	Q9FZD1	Q9FZD1	4348	At1g26460	Pentatricopeptide repeat-containing protein At1g26460, mitochondrial		mitochondrion [GO:0005739]		+	23	23	23	45.9	45.9	45.9	70.234	0	125.46	65824000000	156	567830000	605990000	418200000	403390000	867080000	945510000	815320000	955810000	5277700000	4579000000	214420000	4114400000	4559000000	4693700000	4409300000	4781700000	5439300000	3533600000	5068100000	4940600000	4332900000	3952300000	152340000	197170000	32.9	30.6	30.6
+	3.55927	0.98533	O23654	O23654	1246	VHA-A	V-type proton ATPase catalytic subunit A	ATP metabolic process [GO:0046034];Golgi organization [GO:0007030];pollen development [GO:0009555]	cell wall [GO:0005618];chloroplast [GO:0009507];chloroplast envelope [GO:0009941];cytosol [GO:0005829];Golgi apparatus [GO:0005794];mitochondrion [GO:0005739];plant-type vacuole [GO:0000325];plasma membrane [GO:0005886];plasmodesma [GO:0009506];proton-transporting V-type ATPase, V1 domain [GO:0033180];vacuolar membrane [GO:0005774];vacuole [GO:0005773]	ATP binding [GO:0005524];protease binding [GO:0002020];proton-transporting ATPase activity, rotational mechanism [GO:0046961]	+	82	82	81	86	86	86	68.812	0	323.31	347340000000	1582	29987000000	28725000000	23683000000	25136000000	34163000000	34628000000	33360000000	33914000000	7528800000	7179500000	8578300000	7650000000	5468800000	4772500000	5837800000	5428500000	7898700000	5496700000	8331100000	8548900000	5182100000	5328600000	5222100000	5292700000	84.6	83.8	83.1
+	1.50639	0.976117	F4I962	F4I962	629	SNL3	SIN3-like 3	regulation of transcription, DNA-templated [GO:0006355]	nucleus [GO:0005634]	transcription corepressor activity [GO:0003714]	+	7	6	5	7.4	6.6	5.8	150.82	0	6.5559	2094300000	8	51321000	49974000	46432000	184550000	295080000	52970000	54224000	46055000	111450000	102880000	94074000	97672000	62285000	74221000	78319000	83446000	70419000	56797000	73537000	64390000	101550000	75394000	82721000	84524000	4.5	4.5	5.4
+	1.49075	0.975474	F4I9J7	F4I9J7	632	Y14	RNA-binding protein Y14	mRNA processing [GO:0006397];mRNA transport [GO:0051028];nuclear-transcribed mRNA catabolic process, nonsense-mediated decay [GO:0000184];positive regulation of gene expression [GO:0010628];regulation of alternative mRNA splicing, via spliceosome [GO:0000381];regulation of translation [GO:0006417];RNA splicing [GO:0008380]	cytoplasm [GO:0005737];cytosol [GO:0005829];exon-exon junction complex [GO:0035145];nuclear body [GO:0016604];nuclear speck [GO:0016607];nucleolus [GO:0005730];nucleoplasm [GO:0005654];nucleus [GO:0005634]	mRNA binding [GO:0003729]	+	6	6	6	28.7	28.7	28.7	22.438	0	34.505	8308700000	86	594900000	675650000	476860000	545880000	802040000	855460000	813110000	725980000	257780000	215010000	209230000	252410000	104870000	161640000	162320000	151490000	190770000	155940000	188700000	218580000	166630000	134960000	132750000	115750000	28.7	28.7	23.8
+	1.34468	0.972597	F4I5P3	F4I5P3	617	MAC3A	MOS4-associated complex 3A	DNA repair [GO:0006281];mRNA splicing, via spliceosome [GO:0000398]	Prp19 complex [GO:0000974]	ubiquitin protein ligase activity [GO:0061630]	+	28	25	25	56.2	52	52	56.881	0	91.359	8810000000	175	576440000	690150000	493140000	423290000	903050000	956490000	801050000	750520000	164420000	165170000	186580000	165960000	164880000	218590000	176190000	238620000	294510000	120010000	269520000	292990000	219770000	203250000	211660000	123720000	35.2	46.8	36.9
+	3.12951	0.968317	Q9ZUU4	Q9ZUU4	5967	CP29B	RNA-binding protein CP29B, chloroplastic	innate immune response [GO:0045087];mRNA processing [GO:0006397];regulation of RNA metabolic process [GO:0051252];response to abscisic acid [GO:0009737];response to cold [GO:0009409]	chloroplast [GO:0009507];chloroplast envelope [GO:0009941];chloroplast stroma [GO:0009570];chloroplast thylakoid [GO:0009534];chloroplast thylakoid membrane [GO:0009535];endoplasmic reticulum [GO:0005783];nucleus [GO:0005634];ribonucleoprotein complex [GO:1990904];stromule [GO:0010319];thylakoid [GO:0009579]	mRNA binding [GO:0003729];poly(U) RNA binding [GO:0008266];RNA binding [GO:0003723]	+	17	17	13	55.4	55.4	52.2	30.718	0	323.31	222630000000	789	211220000	188690000	129960000	129580000	383490000	471770000	418360000	408820000	13220000000	12729000000	13544000000	12044000000	11117000000	12116000000	10937000000	12640000000	18457000000	14700000000	18896000000	19361000000	13656000000	12073000000	12499000000	12296000000	27	24.9	31.8
+	1.34791	0.962805	Q9ZR03	Q9ZR03	5907	petC	Cytochrome b6-f complex iron-sulfur subunit, chloroplastic	defense response to bacterium [GO:0042742];nonphotochemical quenching [GO:0010196];photosynthetic electron transport chain [GO:0009767];response to karrikin [GO:0080167]	chloroplast [GO:0009507];chloroplast envelope [GO:0009941];chloroplast thylakoid [GO:0009534];chloroplast thylakoid membrane [GO:0009535];cytochrome b6f complex [GO:0009512];cytosol [GO:0005829];integral component of membrane [GO:0016021];membrane [GO:0016020];plasma membrane [GO:0005886];thylakoid [GO:0009579]	2 iron, 2 sulfur cluster binding [GO:0051537];electron transporter, transferring electrons from cytochrome b6/f complex of photosystem II activity [GO:0046028];electron transporter, transferring electrons within cytochrome b6/f complex of photosystem II activity [GO:0045158];metal ion binding [GO:0046872];oxidoreductase activity [GO:0016491]	+	6	6	6	39.7	39.7	39.7	24.366	0	72.464	3544200000	48	8545600	12786000	0	0	0	22149000	13581000	9838100	353850000	330020000	391730000	338910000	147890000	189860000	166210000	166580000	227970000	123980000	237820000	193280000	182250000	151220000	127680000	148070000	6.6	6.6	0
+	1.90695	0.956416	Q9SJ89	Q9SJ89	5395	FTRC	Ferredoxin-thioredoxin reductase catalytic chain, chloroplastic	oxidation-reduction process [GO:0055114]	chloroplast [GO:0009507];chloroplast envelope [GO:0009941];chloroplast stroma [GO:0009570]	4 iron, 4 sulfur cluster binding [GO:0051539];electron transfer activity [GO:0009055];ferredoxin:thioredoxin reductase activity [GO:0030385];ferredoxin-thioredoxin reductase activity [GO:0103012];metal ion binding [GO:0046872]	+	21	21	21	76	76	76	16.434	0	323.31	38614000000	248	62126000	55862000	0	0	8833200	4658800	109670000	5151600	3625400000	3384200000	4103000000	3492800000	1825800000	1993100000	1955600000	1985700000	2040000000	1438300000	1611100000	1732200000	2426500000	2283600000	2278500000	2191600000	28.1	20.5	0
+	1.71927	0.954745	O04151	O04151	1081	CRT1	Calreticulin-1	endoplasmic reticulum unfolded protein response [GO:0030968];protein folding [GO:0006457];response to cadmium ion [GO:0046686];response to endoplasmic reticulum stress [GO:0034976];response to oxidative stress [GO:0006979]	endoplasmic reticulum [GO:0005783];endoplasmic reticulum lumen [GO:0005788];endoplasmic reticulum membrane [GO:0005789];mitochondrion [GO:0005739];nucleus [GO:0005634];plasmodesma [GO:0009506];secretory vesicle [GO:0099503];vacuolar membrane [GO:0005774]	calcium ion binding [GO:0005509];carbohydrate binding [GO:0030246];unfolded protein binding [GO:0051082]	+	60	43	43	84.5	71.1	71.1	48.527	0	323.31	68793000000	612	3149500000	3765100000	3481200000	3005900000	5473000000	5729500000	5497300000	5265100000	1590000000	1597700000	1869100000	1617700000	1848900000	2017200000	2105100000	2143900000	2522100000	1942100000	2345500000	2624400000	2394300000	2224100000	2540300000	2044000000	70.4	69.9	84.5
+	1.86342	0.953361	Q05758	Q05758	2024	At3g58610	Ketol-acid reductoisomerase, chloroplastic	branched-chain amino acid biosynthetic process [GO:0009082];isoleucine biosynthetic process [GO:0009097];response to cadmium ion [GO:0046686];valine biosynthetic process [GO:0009099]	apoplast [GO:0048046];cell wall [GO:0005618];chloroplast [GO:0009507];chloroplast envelope [GO:0009941];chloroplast stroma [GO:0009570];cytosol [GO:0005829];mitochondrion [GO:0005739];plastid [GO:0009536]	copper ion binding [GO:0005507];ketol-acid reductoisomerase activity [GO:0004455]	+	51	51	51	66.2	66.2	66.2	63.812	0	323.31	443710000000	2025	17196000000	18358000000	13273000000	13184000000	26242000000	27033000000	23622000000	28271000000	17572000000	16732000000	19075000000	16250000000	12354000000	14510000000	14422000000	15060000000	20285000000	16367000000	21864000000	22012000000	19374000000	15406000000	18725000000	16526000000	64	65	65
+	1.47694	0.949424	Q9FFE0	Q9FFE0	3892	At5g16450	Putative 4-hydroxy-4-methyl-2-oxoglutarate aldolase 2	regulation of RNA metabolic process [GO:0051252]	plastid [GO:0009536]	4-hydroxy-4-methyl-2-oxoglutarate aldolase activity [GO:0047443];metal ion binding [GO:0046872];oxaloacetate decarboxylase activity [GO:0008948];ribonuclease inhibitor activity [GO:0008428]	+	15	15	6	66.3	66.3	35.5	17.82	0	172.41	31920000000	233	1187800000	1210700000	1066400000	826510000	1305100000	1366200000	1631500000	1546600000	1032900000	1069800000	1095800000	1255900000	981630000	1197500000	1279000000	1188400000	1100400000	1191200000	1775600000	1535500000	1846300000	1756300000	1691900000	1781500000	60.8	60.8	57.2
+	1.46748	0.940415	F4IIU4	F4IIU4	689	AIR9	187-kDa microtubule-associated protein AIR9	cell cycle [GO:0007049];cell division [GO:0051301];lateral root morphogenesis [GO:0010102];response to auxin [GO:0009733]	cortical microtubule [GO:0055028];phragmoplast [GO:0009524];plasma membrane [GO:0005886];plasmodesma [GO:0009506];preprophase band [GO:0009574]		+	23	23	23	18	18	18	186.86	0	33.241	3403400000	92	151670000	202760000	163050000	159320000	236770000	325480000	264410000	270110000	144140000	120320000	107280000	111590000	102160000	114070000	70036000	122310000	61988000	83908000	73641000	75849000	135630000	115680000	102530000	88650000	9.2	11.1	9.8
+	1.45266	0.929325	Q8VY07	Q8VY07	3102	EPSIN1	Clathrin interactor EPSIN 1	endocytosis [GO:0006897];protein targeting to vacuole [GO:0006623]	actin filament [GO:0005884];clathrin vesicle coat [GO:0030125];endosome [GO:0005768];Golgi apparatus [GO:0005794];intracellular membrane-bounded organelle [GO:0043231];late endosome [GO:0005770];plasma membrane [GO:0005886];thylakoid [GO:0009579]	clathrin binding [GO:0030276];phospholipid binding [GO:0005543];protease binding [GO:0002020]	+	19	19	19	38.2	38.2	38.2	60.634	0	137.03	4144600000	60	232500000	276670000	229620000	258120000	560930000	684620000	643270000	512810000	89480000	65170000	86482000	50260000	23034000	8429500	38285000	43971000	63234000	43160000	40421000	78671000	21862000	20682000	35682000	37209000	23.4	23.9	19.1
+	4.79851	0.927019	Q9FLT0	Q9FLT0	4137	TSN2	Ribonuclease TUDOR 2	cellular response to heat [GO:0034605];gene silencing by RNA [GO:0031047];gibberellin biosynthetic process [GO:0009686];mRNA catabolic process [GO:0006402];mRNA processing [GO:0006397];positive regulation of gibberellin biosynthetic process [GO:0010372];response to cadmium ion [GO:0046686];response to salt stress [GO:0009651];RNA catabolic process [GO:0006401];seed germination [GO:0009845]	cytoplasm [GO:0005737];cytoplasmic stress granule [GO:0010494];cytosol [GO:0005829];endoplasmic reticulum [GO:0005783];nuclear envelope [GO:0005635];nucleus [GO:0005634];P-body [GO:0000932];perinuclear region of cytoplasm [GO:0048471];plasmodesma [GO:0009506];plastid [GO:0009536];RISC complex [GO:0016442]	mRNA binding [GO:0003729];nuclease activity [GO:0004518];RNA binding [GO:0003723]	+	110	83	83	82.2	69.3	69.3	107.74	0	323.31	147450000000	1211	8078100000	9217400000	7405300000	6784700000	11531000000	11575000000	10096000000	11549000000	3754400000	3323600000	4152700000	3230600000	3860600000	4394100000	4291400000	4462300000	5493700000	3970100000	5226800000	5803900000	5189800000	4652200000	5051500000	4351200000	77.8	78.2	75.3
+	1.40576	0.917479	Q93ZC9	Q93ZC9	3351	GLCAK1	Glucuronokinase 1	carbohydrate phosphorylation [GO:0046835];cell wall biogenesis [GO:0042546];glucose 6-phosphate metabolic process [GO:0051156];inositol metabolic process [GO:0006020];pollen tube development [GO:0048868]	cytosol [GO:0005829]	ATP binding [GO:0005524];glucuronokinase activity [GO:0047940];metal ion binding [GO:0046872];poly(U) RNA binding [GO:0008266]	+	15	15	15	59.1	59.1	59.1	40.075	0	67.642	4226700000	116	189330000	187020000	118720000	100270000	221510000	372140000	297220000	354030000	91842000	84101000	230860000	164650000	128110000	123010000	167930000	167830000	127590000	116810000	149400000	98155000	217800000	207150000	133040000	178230000	48.9	43.4	37.8
+	1.62005	0.903812	Q8GW64	Q8GW64	2637	At1g18440	Peptidyl-tRNA hydrolase, chloroplastic		chloroplast [GO:0009507];chloroplast stroma [GO:0009570]	aminoacyl-tRNA hydrolase activity [GO:0004045]	+	9	9	9	43.1	43.1	43.1	31.561	0	26.264	16005000000	74	75331000	77255000	45640000	89724000	41821000	80044000	56956000	61831000	952030000	1388200000	1273600000	1397700000	100170000	1238100000	171310000	1795300000	1177200000	756930000	1297700000	1421900000	87767000	973000000	1366000000	79536000	2.4	2.4	2.4
+	4.33862	0.897488	Q9ASR1	Q9ASR1	3623	LOS1	Elongation factor 2	cold acclimation [GO:0009631];response to cold [GO:0009409];translational elongation [GO:0006414]	chloroplast [GO:0009507];cytosol [GO:0005829];nucleolus [GO:0005730];nucleus [GO:0005634];plasma membrane [GO:0005886];plasmodesma [GO:0009506];ribonucleoprotein complex [GO:1990904];vacuolar membrane [GO:0005774]	copper ion binding [GO:0005507];GTP binding [GO:0005525];GTPase activity [GO:0003924];mRNA binding [GO:0003729];ribosome binding [GO:0043022];translation elongation factor activity [GO:0003746]	+	137	137	98	95.6	95.6	74.3	93.89	0	323.31	2162900000000	5370	104580000000	104650000000	94345000000	78486000000	129440000000	122450000000	113310000000	117190000000	89260000000	74899000000	90862000000	81238000000	64655000000	70343000000	76669000000	74463000000	89989000000	65594000000	91746000000	91495000000	86998000000	81109000000	83032000000	86127000000	95.6	95.6	95.5
+	1.46251	0.896672	Q5XF06;A0A1P8B2X6	Q5XF06	2384	TIM44-2	Mitochondrial import inner membrane translocase subunit TIM44-2	protein import into mitochondrial matrix [GO:0030150];protein targeting to mitochondrion [GO:0006626]	mitochondrial inner membrane [GO:0005743];mitochondrion [GO:0005739];TIM23 mitochondrial import inner membrane translocase complex [GO:0005744]	ATPase-coupled protein transmembrane transporter activity [GO:0015462];chaperone binding [GO:0051087]	+	13	13	13	29.9	29.9	29.9	53.645	0	48.594	1700900000	42	136370000	179290000	140080000	120640000	302660000	304460000	250440000	257880000	0	0	355440	0	7699500	0	0	0	339490	214350	0	515210	0	0	0	0	27.1	25.8	23.5
+	1.91943	0.896627	O23722	O23722	1258	MVD1	Diphosphomevalonate decarboxylase MVD1, peroxisomal	isopentenyl diphosphate biosynthetic process, mevalonate pathway [GO:0019287];sterol biosynthetic process [GO:0016126]	cytosol [GO:0005829];peroxisome [GO:0005777]	ATP binding [GO:0005524];diphosphomevalonate decarboxylase activity [GO:0004163];identical protein binding [GO:0042802]	+	37	37	25	79.4	79.4	62.1	45.585	0	323.31	92531000000	489	9512500000	9632400000	7699900000	7695100000	10426000000	10508000000	9602600000	10314000000	1319400000	1022300000	1241000000	1152500000	960050000	1167800000	1018500000	1152400000	837730000	674220000	1026700000	831440000	1240100000	1140300000	1124100000	1231500000	77.2	79.4	71.6
+	3.7785	0.894161	Q9M3B4	Q9M3B4	5043	RID3	Protein ROOT INITIATION DEFECTIVE 3	negative regulation of shoot apical meristem development [GO:1902184];regulation of DNA-dependent DNA replication initiation [GO:0030174];rRNA processing [GO:0006364]	Cul4-RING E3 ubiquitin ligase complex [GO:0080008];nuclear pre-replicative complex [GO:0005656];Rix1 complex [GO:0097344]		+	4	4	4	8.2	8.2	8.2	48.149	1	-2	420190000	6	4667900	0	0	0	9816900	27490000	4116300	12976000	25851000	35732000	34654000	33386000	16044000	20740000	17351000	21447000	19842000	18284000	23301000	41130000	14994000	11966000	14536000	11868000	2.5	0	0
+	1.58657	0.879325	Q8LFS6	Q8LFS6	2933	BRN1	RNA-binding protein BRN1	flower development [GO:0009908];mRNA catabolic process [GO:0006402];plant-type hypersensitive response [GO:0009626];positive regulation of salicylic acid mediated signaling pathway [GO:0080151];regulation of photoperiodism, flowering [GO:2000028]	cytoplasm [GO:0005737];cytosol [GO:0005829];nucleus [GO:0005634];ribonucleoprotein complex [GO:1990904]	mRNA binding [GO:0003729];RNA binding [GO:0003723]	+	9	9	9	17.9	17.9	17.9	48.198	0	9.4515	1616300000	33	66447000	73840000	40986000	41484000	107530000	137080000	105000000	140910000	84205000	95368000	80238000	84601000	27207000	52121000	48922000	36130000	65672000	33160000	54241000	52829000	47786000	39934000	55348000	45202000	11.8	7	9.1
+	3.69139	0.878955	Q43349	Q43349	2316	CP29A	29 kDa ribonucleoprotein, chloroplastic	cold acclimation [GO:0009631];mRNA processing [GO:0006397];regulation of RNA metabolic process [GO:0051252];RNA stabilization [GO:0043489]	chloroplast [GO:0009507];nucleus [GO:0005634];ribonucleoprotein complex [GO:1990904]	mRNA binding [GO:0003729];RNA binding [GO:0003723]	+	13	9	9	31	25.4	25.4	36.007	0	297.81	17378000000	155	11374000	7606600	0	41517000	28090000	70343000	84297000	40847000	1073700000	843640000	1108600000	1068700000	508810000	598190000	638270000	581130000	2258200000	1780300000	2293800000	2386600000	578500000	430940000	490200000	453910000	7.6	9.6	2.9
+	1.42514	0.875618	A0A1P8AUP4	A0A1P8AUP4	136	At1g27430	GYF domain-containing protein				+	12	9	9	10.9	9	9	152.24	0	37.023	4771800000	23	121930000	67401000	55919000	77054000	144220000	191420000	3909800000	161180000	1826100	1546700	0	0	1911500	2369200	1650400	2382100	0	0	1826800	12052000	2024600	0	2162000	13162000	8.1	6.5	5.6
+	1.58501	0.870488	Q9M1J8	Q9M1J8	4982	F24I3.80	At3g57000	rRNA base methylation [GO:0070475]	nucleolus [GO:0005730];small-subunit processome [GO:0032040]	rRNA (pseudouridine) methyltransferase activity [GO:0070037];rRNA binding [GO:0019843]	+	2	2	2	6.4	6.4	6.4	33.829	0.00019157	2.7917	103760000	4	6983000	6231400	3957100	0	11058000	15750000	11956000	11877000	640190	1306900	1091000	978050	2930000	3439100	3177500	3389900	2765200	808220	2232500	2951100	1753700	1958500	2961600	3567000	6.4	6.4	2.7
+	1.3664	0.870124	Q9FMF9	Q9FMF9	4167	MSJ1.11	Nuclear protein-like	spliceosomal complex assembly [GO:0000245]	catalytic step 2 spliceosome [GO:0071013];plastid [GO:0009536];U12-type spliceosomal complex [GO:0005689];U2 snRNP [GO:0005686];U2-type prespliceosome [GO:0071004]	mRNA binding [GO:0003729]	+	34	34	34	32.1	32.1	32.1	141.45	0	99.274	6724300000	129	573440000	650830000	606570000	491480000	919650000	1033400000	911760000	931820000	59795000	62396000	66572000	50420000	5004000	16308000	13235000	19971000	52838000	50567000	88667000	99978000	0	4535700	7065800	8025900	23.2	25.5	24.1
+	1.44318	0.869389	Q9LHA6	Q9LHA6	4443	At3g28220	AT3g28220/T19D11_3		chloroplast envelope [GO:0009941];cytosol [GO:0005829];integral component of membrane [GO:0016021];vacuole [GO:0005773]		+	20	20	20	32.2	32.2	32.2	42.886	0	138.15	6124300000	108	4865500	0	0	0	31154000	4192100	11235000	4238600	115540000	130720000	159460000	140150000	325350000	354730000	354160000	371320000	698940000	607250000	725220000	858530000	334910000	343810000	222180000	326350000	2.4	0	0
+	2.79402	0.864938	Q9ZPR2	Q9ZPR2	5884	At2g03640	Nuclear transport factor 2 (NTF2) family protein with RNA binding (RRM-RBD-RNP motifs) domain-containing protein			RNA binding [GO:0003723]	+	9	9	9	28.6	28.6	28.6	46.202	0	32.297	2129500000	46	128240000	105350000	80948000	75623000	194460000	222980000	209310000	148870000	39011000	44342000	14425000	23110000	60803000	66307000	58378000	78151000	115600000	84590000	97327000	66135000	72061000	43077000	42790000	57589000	13.5	17.5	16.5
+	1.74905	0.862564	O64883	O64883	1388	BGLU26	Beta-glucosidase 26, peroxisomal	carbohydrate metabolic process [GO:0005975];defense response by callose deposition in cell wall [GO:0052544];defense response to bacterium [GO:0042742];defense response to fungus, incompatible interaction [GO:0009817];glucosinolate catabolic process [GO:0019762];glucosinolate metabolic process [GO:0019760];indole glucosinolate catabolic process [GO:0042344];induced systemic resistance [GO:0009682…	chloroplast envelope [GO:0009941];membrane [GO:0016020];peroxisome [GO:0005777]	beta-glucosidase activity [GO:0008422];scopolin beta-glucosidase activity [GO:0102483];thioglucosidase activity [GO:0019137]	+	23	22	22	40.4	39.1	39.1	63.915	0	116.61	11732000000	176	1077500000	1196700000	917400000	801690000	1180400000	1093300000	980650000	1070400000	410150000	256800000	333660000	292490000	168890000	176460000	129160000	136530000	114000000	129530000	184100000	168340000	216840000	233270000	224500000	238890000	37.5	37.3	33.9
+	3.94533	0.859315	Q9M0A7	Q9M0A7	4939	GGP1	Gamma-glutamyl peptidase 1	camalexin biosynthetic process [GO:0010120];glucosinolate metabolic process [GO:0019760]	cytoplasm [GO:0005737];cytosol [GO:0005829];plasma membrane [GO:0005886];secretory vesicle [GO:0099503]	gamma-glutamyl-peptidase activity [GO:0034722];peptidase activity [GO:0008233]	+	34	34	33	92.8	92.8	92.8	28.385	0	323.31	64752000000	568	3380400000	3228400000	2436600000	1928900000	4503800000	4604600000	4577100000	4590500000	1979600000	1816300000	2396500000	1925800000	2084000000	2560600000	2313600000	2277900000	1881200000	1514200000	1965400000	1988900000	2697200000	2874500000	2707800000	2518200000	90.4	78.4	81.2
+	1.88437	0.857694	Q9S850	Q9S850	5176	SOX	Sulfite oxidase	chlorophyll metabolic process [GO:0015994];response to sulfur dioxide [GO:0010477];sulfur compound metabolic process [GO:0006790]	cytosol [GO:0005829];mitochondrion [GO:0005739];peroxisome [GO:0005777]	heme binding [GO:0020037];molybdenum ion binding [GO:0030151];molybdopterin cofactor binding [GO:0043546];sulfite oxidase activity [GO:0008482]	+	42	42	42	86.8	86.8	86.8	43.329	0	323.31	140010000000	845	4621300000	3826800000	3679700000	3272400000	4538600000	4741500000	4266000000	3781800000	8914300000	8273900000	8176100000	7246400000	5442800000	6628400000	5831600000	6536400000	6019600000	4677000000	6347000000	6065200000	7573100000	6268700000	6862500000	6423100000	77.1	80.4	79.4
+	1.52506	0.855247	Q6NPL0	Q6NPL0	2461	At4g09040	At4g09040		chloroplast [GO:0009507];chloroplast stroma [GO:0009570];cytoplasm [GO:0005737];nucleus [GO:0005634];ribonucleoprotein complex [GO:1990904]	mRNA binding [GO:0003729]	+	11	11	11	36.5	36.5	36.5	34.032	0	73.695	5058400000	78	12332000	0	0	0	0	0	0	0	578640000	441400000	626060000	481930000	200030000	242030000	182070000	252740000	248930000	357160000	323250000	360090000	191780000	158450000	192360000	209170000	3.3	0	0
+	2.01248	0.853978	P14671	P14671	1639	TSB1	Tryptophan synthase beta chain 1, chloroplastic	indoleacetic acid biosynthetic process [GO:0009684];response to oxidative stress [GO:0006979];tryptophan biosynthetic process [GO:0000162]	chloroplast [GO:0009507];chloroplast stroma [GO:0009570];cytoplasm [GO:0005737];plasma membrane [GO:0005886]	protein domain specific binding [GO:0019904];tryptophan synthase activity [GO:0004834]	+	39	39	18	76.2	76.2	47.2	50.925	0	323.31	70011000000	616	3507400000	3418300000	2379700000	2630800000	3151600000	3628700000	3114500000	3139900000	2658000000	2490900000	3110500000	2827000000	2726600000	2874100000	2350600000	2776100000	2849500000	2337900000	2669200000	3171800000	3243800000	2933500000	2621700000	3398800000	71.9	71.7	65.1
+	1.65136	0.842871	P49206	P49206	1850	RPS26A	40S ribosomal protein S26-1	translation [GO:0006412]	cytosolic small ribosomal subunit [GO:0022627]	mRNA binding [GO:0003729];structural constituent of ribosome [GO:0003735]	+	14	14	5	53.4	53.4	19.8	14.729	0	169.61	49033000000	113	5434100000	5416200000	4508900000	4224700000	8371700000	6337800000	7552900000	7011500000	6679700	7591300	7977100	4373400	0	0	0	0	8104300	11272000	7593500	80671000	11364000	18595000	10809000	0	52.7	52.7	52.7
+	2.70349	0.841362	Q9SJ13	Q9SJ13	5385	At2g21860	At2g21860/F7D8.18		chloroplast [GO:0009507]	magnesium chelatase activity [GO:0016851];oxidoreductase activity [GO:0016491];violaxanthin de-epoxidase activity [GO:0046422]	+	9	9	9	15.3	15.3	15.3	59.287	0	15.693	1733900000	57	0	0	0	0	0	0	0	0	139780000	112870000	133830000	115620000	73404000	113800000	78927000	90321000	155050000	100080000	124910000	203430000	89319000	25561000	75244000	101790000	0	0	0
+	5.60843	0.84054	O82663	O82663	1598	SDH1-1	Succinate dehydrogenase [ubiquinone] flavoprotein subunit 1, mitochondrial	mitochondrial electron transport, succinate to ubiquinone [GO:0006121];tricarboxylic acid cycle [GO:0006099]	cell wall [GO:0005618];mitochondrial respiratory chain complex II, succinate dehydrogenase complex (ubiquinone) [GO:0005749];mitochondrion [GO:0005739];plastid [GO:0009536];respiratory chain complex II [GO:0045273]	ATP binding [GO:0005524];cobalt ion binding [GO:0050897];electron transfer activity [GO:0009055];flavin adenine dinucleotide binding [GO:0050660];oxidoreductase activity [GO:0016491];succinate dehydrogenase (ubiquinone) activity [GO:0008177];succinate dehydrogenase activity [GO:0000104]	+	49	49	35	77.1	77.1	53.3	69.656	0	323.31	118870000000	847	14343000000	10390000000	8721200000	8147600000	10480000000	10330000000	10454000000	9494900000	2029400000	1926100000	2136500000	2014300000	1424600000	1682400000	1950200000	1996400000	3771700000	2743200000	3853600000	4704000000	1616400000	1673000000	1513100000	1476400000	72.4	73.5	77.1
+	1.89982	0.840259	Q9FLH2	Q9FLH2	4126	MPA24.10	2-oxoglutarate dehydrogenase, E1 component	response to cadmium ion [GO:0046686];tricarboxylic acid cycle [GO:0006099]	mitochondrion [GO:0005739];oxoglutarate dehydrogenase complex [GO:0045252];plastid [GO:0009536]	cobalt ion binding [GO:0050897];oxoglutarate dehydrogenase (succinyl-transferring) activity [GO:0004591];thiamine pyrophosphate binding [GO:0030976];zinc ion binding [GO:0008270]	+	76	53	53	65.9	50.7	50.7	116.4	0	323.31	36808000000	555	2667300000	1774100000	1361200000	1404600000	2768900000	2617900000	2016400000	2424500000	1276200000	1220500000	1167800000	1234500000	784540000	1054700000	1088000000	1286800000	1762400000	899010000	1736600000	1724500000	1187600000	1084200000	1248000000	1017400000	56	56	56.8
+	3.76385	0.836277	Q42522	Q42522	2275	GSA2	Glutamate-1-semialdehyde 2,1-aminomutase 2, chloroplastic	chlorophyll biosynthetic process [GO:0015995];porphyrin-containing compound biosynthetic process [GO:0006779];protoporphyrinogen IX biosynthetic process [GO:0006782]	chloroplast [GO:0009507];chloroplast envelope [GO:0009941];chloroplast stroma [GO:0009570];cytosol [GO:0005829]	glutamate-1-semialdehyde 2,1-aminomutase activity [GO:0042286];protein homodimerization activity [GO:0042803];pyridoxal phosphate binding [GO:0030170];transaminase activity [GO:0008483]	+	45	45	28	73.1	73.1	44.1	50.141	0	323.31	200870000000	976	596390000	664400000	480420000	413170000	677870000	680190000	947720000	659320000	13272000000	11434000000	12592000000	10485000000	9122500000	10071000000	11672000000	11896000000	14570000000	9589800000	15542000000	13967000000	14602000000	12685000000	12342000000	11903000000	39.8	40.3	28.8
+	4.25857	0.832878	P19366	P19366	1653	atpB	ATP synthase subunit beta, chloroplastic	ATP synthesis coupled proton transport [GO:0015986];defense response to fungus, incompatible interaction [GO:0009817];response to cold [GO:0009409]	cell wall [GO:0005618];chloroplast [GO:0009507];chloroplast ATP synthase complex [GO:0009544];chloroplast stroma [GO:0009570];chloroplast thylakoid [GO:0009534];chloroplast thylakoid membrane [GO:0009535];plastid [GO:0009536];plastoglobule [GO:0010287];proton-transporting ATP synthase complex, catalytic core F(1) [GO:0045261];stromule [GO:0010319];thylakoid [GO:0009579];thylakoid lumen [GO:003197…	ATP binding [GO:0005524];proton-transporting ATP synthase activity, rotational mechanism [GO:0046933];zinc ion binding [GO:0008270]	+	68	68	66	98.6	98.6	98.6	53.933	0	323.31	2935500000000	3959	420330000	679440000	820840000	574380000	1515600000	1922100000	1230200000	1442400000	224020000000	190960000000	227810000000	225420000000	135350000000	146730000000	151760000000	158760000000	226890000000	182010000000	222040000000	220320000000	154140000000	154810000000	151180000000	154670000000	37.8	37.1	35.3
+	1.58174	0.83182	A0A1P8AWX3;O48705	A0A1P8AWX3	163	At1g33590	Leucine-rich repeat (LRR) family protein				+	48	48	43	74.5	74.5	72.4	55.837	0	323.31	154160000000	964	39288000	58274000	50238000	51587000	391310000	187830000	155540000	130540000	9035900000	9030500000	10138000000	9576600000	9131600000	9745900000	8686400000	10381000000	8180800000	7597300000	8479000000	9016900000	11903000000	9512900000	11362000000	11319000000	12.8	12.3	9.7
+	2.37613	0.830939	Q38858	Q38858	2136	CRT2	Calreticulin-2	endoplasmic reticulum unfolded protein response [GO:0030968];protein folding [GO:0006457];response to endoplasmic reticulum stress [GO:0034976];response to oxidative stress [GO:0006979]	endoplasmic reticulum [GO:0005783];endoplasmic reticulum lumen [GO:0005788];endoplasmic reticulum membrane [GO:0005789];extracellular region [GO:0005576];mitochondrion [GO:0005739];secretory vesicle [GO:0099503];vacuole [GO:0005773]	calcium ion binding [GO:0005509];carbohydrate binding [GO:0030246];unfolded protein binding [GO:0051082]	+	62	62	45	89.4	89.4	81.4	48.156	0	323.31	137050000000	943	7963800000	7850300000	6161800000	6491700000	12235000000	11923000000	11940000000	12293000000	2881500000	2774100000	3284100000	2811400000	3240300000	3517000000	3940600000	3910200000	4354900000	3500000000	4466100000	4752200000	4092600000	3669300000	4598100000	4404000000	85.1	85.1	68.2
+	1.57732	0.826221	Q93Z66	Q93Z66	3341	PRS3	Ribose-phosphate pyrophosphokinase 3, chloroplastic	5-phosphoribose 1-diphosphate biosynthetic process [GO:0006015];nucleoside metabolic process [GO:0009116];nucleotide biosynthetic process [GO:0009165];purine nucleotide biosynthetic process [GO:0006164]	chloroplast [GO:0009507];cytoplasm [GO:0005737];ribose phosphate diphosphokinase complex [GO:0002189]	ATP binding [GO:0005524];kinase activity [GO:0016301];magnesium ion binding [GO:0000287];ribose phosphate diphosphokinase activity [GO:0004749]	+	11	11	11	27.5	27.5	27.5	44.696	0	29.654	5534200000	94	276630000	163970000	98224000	125550000	183470000	262990000	195800000	241870000	352200000	304100000	414130000	376970000	113900000	152970000	218060000	206050000	310990000	86272000	324980000	295020000	238910000	212150000	226860000	152100000	23.1	11.9	11.7
+	1.56255	0.821117	P0DKL6	P0DKL6	1626	SAP130B	Spliceosome-associated protein 130 B	microgametogenesis [GO:0055046];mRNA splicing, via spliceosome [GO:0000398];plant ovule development [GO:0048481];pollen development [GO:0009555];pollen germination [GO:0009846]	nucleus [GO:0005634]	nucleic acid binding [GO:0003676]	+	52	52	51	42.8	42.8	42.3	134.97	0	323.31	22652000000	358	2164100000	2045800000	1595100000	1930000000	2143200000	2384500000	2177600000	2138200000	272020000	283410000	348840000	416470000	251320000	326550000	221830000	241900000	558700000	515430000	703450000	884970000	308560000	193750000	211360000	334450000	35.3	30	26.9
+	2.04206	0.82059	Q93YZ7	Q93YZ7	3327	At2g31810	Acetolactate synthase small subunit 2, chloroplastic	isoleucine biosynthetic process [GO:0009097];regulation of catalytic activity [GO:0050790];valine biosynthetic process [GO:0009099]	acetolactate synthase complex [GO:0005948];chloroplast [GO:0009507];cytosol [GO:0005829];peroxisome [GO:0005777]	acetolactate synthase activity [GO:0003984];acetolactate synthase regulator activity [GO:1990610];protein self-association [GO:0043621]	+	28	28	26	62.1	62.1	59.5	53.872	0	119.82	12533000000	214	930680000	884400000	737130000	746410000	1154900000	1313300000	1377900000	1398500000	260960000	283460000	419570000	302410000	93284000	183300000	100570000	156790000	332100000	310600000	493630000	437000000	210370000	116540000	146470000	142750000	51.3	45.4	54.6
+	1.45693	0.812048	Q9SVU5	Q9SVU5	5698	At4g28780	GDSL esterase/lipase At4g28780	lipid catabolic process [GO:0016042]	extracellular region [GO:0005576]	hydrolase activity, acting on ester bonds [GO:0016788]	+	7	7	7	29.2	29.2	29.2	39.896	0	69.192	1699100000	37	41667000	45346000	9918000	41739000	22821000	41991000	24326000	41518000	136950000	124170000	141200000	69376000	64714000	69326000	55684000	57676000	148890000	82599000	88417000	142250000	83675000	34072000	65810000	64924000	2.5	2.5	6.8
+	1.42598	0.809777	O04499	O04499	1109	PGM1	2,3-bisphosphoglycerate-independent phosphoglycerate mutase 1	cellular carbohydrate metabolic process [GO:0044262];glucose catabolic process [GO:0006007];glycolytic process [GO:0006096];pollen development [GO:0009555];response to cadmium ion [GO:0046686];response to cold [GO:0009409];stomatal movement [GO:0010118]	chloroplast [GO:0009507];cytosol [GO:0005829];extracellular region [GO:0005576];mitochondrial envelope [GO:0005740];plasma membrane [GO:0005886];plasmodesma [GO:0009506]	2,3-bisphosphoglycerate-independent phosphoglycerate mutase activity [GO:0046537];manganese ion binding [GO:0030145]	+	86	86	64	98.6	98.6	88.7	60.579	0	323.31	568080000000	2488	37545000000	42136000000	35122000000	35115000000	46567000000	48100000000	41671000000	44070000000	14536000000	14518000000	14720000000	13393000000	11418000000	13321000000	14124000000	14735000000	16807000000	10769000000	17533000000	17533000000	16987000000	14817000000	16816000000	15732000000	98.6	98	98
+	2.15814	0.805462	Q9SZJ5	Q9SZJ5	5776	SHM1	Serine hydroxymethyltransferase 1, mitochondrial	cellular response to tetrahydrofolate [GO:1904482];circadian rhythm [GO:0007623];folic acid metabolic process [GO:0046655];glycine biosynthetic process from serine [GO:0019264];glycine metabolic process [GO:0006544];L-serine catabolic process [GO:0006565];L-serine metabolic process [GO:0006563];one-carbon metabolic process [GO:0006730];photorespiration [GO:0009853];plant-type hypersensitive respo…	apoplast [GO:0048046];chloroplast stroma [GO:0009570];chloroplast thylakoid [GO:0009534];cytosol [GO:0005829];cytosolic ribosome [GO:0022626];mitochondrial matrix [GO:0005759];mitochondrion [GO:0005739];nucleus [GO:0005634];plasma membrane [GO:0005886];stromule [GO:0010319]	amino acid binding [GO:0016597];cobalt ion binding [GO:0050897];glycine hydroxymethyltransferase activity [GO:0004372];poly(U) RNA binding [GO:0008266];pyridoxal phosphate binding [GO:0030170];serine binding [GO:0070905];zinc ion binding [GO:0008270]	+	89	89	71	90.1	90.1	77.9	57.4	0	323.31	1339900000000	2797	754200000	1064000000	830660000	769040000	684290000	795820000	689880000	767670000	68267000000	69420000000	78375000000	75068000000	72605000000	81736000000	86326000000	87491000000	81934000000	63177000000	87669000000	88298000000	97320000000	99316000000	95076000000	101440000000	42	42.9	38.1
+	2.83032	0.805171	Q8RY94	Q8RY94	3060	At4g18440	Adenylosuccinate lyase	'de novo' AMP biosynthetic process [GO:0044208];'de novo' IMP biosynthetic process [GO:0006189]	chloroplast [GO:0009507];chloroplast stroma [GO:0009570]	(S)-2-(5-amino-1-(5-phospho-D-ribosyl)imidazole-4-carboxamido)succinate AMP-lyase (fumarate-forming) activity [GO:0070626];N6-(1,2-dicarboxyethyl)AMP AMP-lyase (fumarate-forming) activity [GO:0004018]	+	46	46	26	61.6	61.6	46.8	59.757	0	323.31	81341000000	585	234460000	332100000	232930000	199550000	216640000	291600000	256680000	269340000	3455500000	2786900000	3894800000	3308000000	5071900000	5577900000	5738500000	5623900000	6632000000	3971000000	5398900000	6213100000	5854800000	5463100000	5319100000	4998400000	35.1	34.9	33.8
+	1.96745	0.802603	Q96252	Q96252	3593	At5g47030	ATP synthase subunit delta', mitochondrial	ATP synthesis coupled proton transport [GO:0015986]	mitochondrial proton-transporting ATP synthase complex [GO:0005753];mitochondrial proton-transporting ATP synthase complex, catalytic core F(1) [GO:0000275];mitochondrion [GO:0005739];plastid [GO:0009536]	proton-transporting ATP synthase activity, rotational mechanism [GO:0046933];zinc ion binding [GO:0008270]	+	4	4	4	25.1	25.1	25.1	21.547	0	5.779	1369200000	16	70793000	65024000	31743000	54637000	88197000	142320000	167690000	137360000	57883000	23095000	72539000	40617000	28815000	30546000	19166000	18254000	45649000	32119000	61237000	75514000	31431000	24639000	37193000	12729000	25.1	18.7	12.3
+	1.36499	0.801363	F4JT92	F4JT92	924	At4g19610	Nucleotide/nucleic acid binding protein	mRNA cis splicing, via spliceosome [GO:0045292];regulation of alternative mRNA splicing, via spliceosome [GO:0000381]	nuclear speck [GO:0016607];nucleolus [GO:0005730];nucleus [GO:0005634]	RNA binding [GO:0003723]	+	4	4	4	7.2	7.2	7.2	91.563	0	29.369	10437000000	22	412730000	820610000	539660000	622000000	449210000	0	480570000	634190000	418780000	399960000	435720000	397110000	289920000	347550000	327000000	290300000	562460000	427860000	571800000	449170000	548360000	303070000	383200000	325630000	1.6	1.6	1.6
+	1.95908	0.795854	Q9FMD7	Q9FMD7	4160	At5g16590	Probable inactive receptor kinase At5g16590	response to symbiotic fungus [GO:0009610]	integral component of membrane [GO:0016021];plant-type cell wall [GO:0009505];plasma membrane [GO:0005886];plasmodesma [GO:0009506];plastid [GO:0009536]	ATP binding [GO:0005524];protein kinase activity [GO:0004672]	+	25	18	18	46.4	38.1	38.1	67.463	0	205.46	15498000000	228	1111300000	1057800000	759740000	947750000	976550000	1006900000	899080000	839330000	582620000	549780000	700520000	632020000	456580000	484920000	495650000	555850000	413400000	283390000	380760000	377720000	515850000	478200000	480950000	511160000	39.8	38.2	37.8
+	2.38435	0.794654	P92980;REV__P92980	P92980	1969	APR3	5'-adenylylsulfate reductase 3, chloroplastic	cysteine biosynthetic process [GO:0019344];sulfate assimilation [GO:0000103];sulfate reduction [GO:0019419]	chloroplast [GO:0009507]	4 iron, 4 sulfur cluster binding [GO:0051539];adenylyl-sulfate reductase (glutathione) activity [GO:0033741];adenylyl-sulfate reductase activity [GO:0009973];metal ion binding [GO:0046872]	+	16	5	4	38.2	15.3	14	50.694	0	20.891	1080800000	32	44570000	53506000	10089000	31780000	123150000	97906000	94414000	107030000	0	0	0	10795000	34284000	35075000	79132000	45805000	76138000	28622000	87319000	50360000	9386100	32517000	8880800	20028000	31.9	31.2	18.6
+	3.60958	0.788877	Q8GUM2	Q8GUM2	2627	HSP70-9	Heat shock 70 kDa protein 9, mitochondrial	cellular response to unfolded protein [GO:0034620];chaperone cofactor-dependent protein refolding [GO:0051085];protein refolding [GO:0042026];response to cadmium ion [GO:0046686];response to unfolded protein [GO:0006986]	cell wall [GO:0005618];cytoplasm [GO:0005737];cytosol [GO:0005829];mitochondrion [GO:0005739];plasma membrane [GO:0005886];vacuolar membrane [GO:0005774]	ATP binding [GO:0005524];ATPase activity [GO:0016887];heat shock protein binding [GO:0031072];misfolded protein binding [GO:0051787];protein folding chaperone [GO:0044183];unfolded protein binding [GO:0051082];zinc ion binding [GO:0008270]	+	83	79	72	73.3	73.3	72.6	73.074	0	323.31	250130000000	1451	23791000000	25474000000	19218000000	18929000000	22958000000	22522000000	22448000000	22629000000	3355400000	2803700000	3355600000	3199000000	4168300000	4675900000	4891200000	5274600000	5296700000	4118900000	5788100000	5221000000	5398700000	5057500000	4957700000	4597400000	72.1	72.1	73.3
+	2.83906	0.783225	Q9LV33;A0A1I9LMX8	Q9LV33	4763	BGLU44	Beta-glucosidase 44	carbohydrate metabolic process [GO:0005975]	cell wall [GO:0005618];cytosolic ribosome [GO:0022626];extracellular region [GO:0005576];plant-type cell wall [GO:0009505]	4-methylumbelliferyl-beta-D-glucopyranoside beta-glucosidase activity [GO:0080081];amygdalin beta-glucosidase activity [GO:0047668];beta-gentiobiose beta-glucosidase activity [GO:0080083];beta-glucosidase activity [GO:0008422];beta-mannosidase activity [GO:0004567];cellobiose glucosidase activity [GO:0080079];esculin beta-glucosidase activity [GO:0080082];metal ion binding [GO:0046872];scopolin b…	+	70	70	70	77.1	77.1	77.1	58.983	0	323.31	144440000000	1002	157080000	40498000	54652000	60983000	52372000	54119000	146520000	56655000	5102000000	5009400000	5562500000	5153900000	9962800000	11183000000	9716200000	11552000000	8477400000	7197300000	8866100000	9376400000	12890000000	11426000000	11824000000	10514000000	15.2	9.6	5.1
+	1.82854	0.782807	Q9C5D0	Q9C5D0	3666	CBSX2	CBS domain-containing protein CBSX2, chloroplastic	cell redox homeostasis [GO:0045454]	chloroplast [GO:0009507];chloroplast stroma [GO:0009570];plasma membrane [GO:0005886]		+	12	11	10	39.5	39.5	36.6	25.955	0	95.815	5349300000	88	4668500	0	0	0	161790000	0	147160000	146270000	544490000	477590000	497940000	503480000	207360000	259930000	286090000	168100000	259210000	194590000	321160000	185250000	274070000	226740000	198510000	284890000	5.5	2.5	2.5
+	3.41903	0.781551	Q8VZG7	Q8VZG7	3182	TSN1	Ribonuclease TUDOR 1	cellular response to heat [GO:0034605];gene silencing by RNA [GO:0031047];mRNA catabolic process [GO:0006402];mRNA processing [GO:0006397];positive regulation of gibberellin biosynthetic process [GO:0010372];response to cadmium ion [GO:0046686];response to salt stress [GO:0009651];RNA catabolic process [GO:0006401]	cell wall [GO:0005618];cytoplasm [GO:0005737];cytoplasmic stress granule [GO:0010494];cytosol [GO:0005829];endoplasmic reticulum [GO:0005783];nuclear envelope [GO:0005635];nucleus [GO:0005634];P-body [GO:0000932];perinuclear region of cytoplasm [GO:0048471];plasma membrane [GO:0005886];RISC complex [GO:0016442]	mRNA binding [GO:0003729];nuclease activity [GO:0004518];RNA binding [GO:0003723]	+	112	112	85	80.4	80.4	67.3	108.23	0	323.31	282920000000	1781	15754000000	17840000000	14311000000	13933000000	22373000000	21095000000	19719000000	20711000000	6514700000	5511900000	7695900000	6524400000	7454700000	9210800000	8659800000	8681400000	10510000000	8130300000	10712000000	11080000000	10079000000	9053200000	8469600000	8893700000	79.6	76.8	76.7
+	2.22306	0.781235	Q09152	Q09152	2043	FPS1	Farnesyl pyrophosphate synthase 1, mitochondrial	cholesterol biosynthetic process [GO:0006695];farnesyl diphosphate biosynthetic process [GO:0045337];geranyl diphosphate biosynthetic process [GO:0033384]	cytoplasm [GO:0005737];cytosol [GO:0005829];mitochondrion [GO:0005739];plastid [GO:0009536]	dimethylallyltranstransferase activity [GO:0004161];geranyltranstransferase activity [GO:0004337];metal ion binding [GO:0046872]	+	31	31	17	50	50	39.6	44.261	0	224.51	22627000000	232	1928800000	2110000000	1607500000	1198700000	3191300000	3510100000	2943200000	3166500000	266330000	69735000	193000000	241860000	171750000	218910000	364300000	202940000	147190000	117250000	183860000	227890000	157360000	97007000	209350000	102250000	45.3	44.3	40.4
+	1.82366	0.778667	Q96250	Q96250	3591	ATPC	ATP synthase subunit gamma, mitochondrial	ATP biosynthetic process [GO:0006754];ATP synthesis coupled proton transport [GO:0015986]	cell wall [GO:0005618];chloroplast [GO:0009507];cytoplasm [GO:0005737];endoplasmic reticulum [GO:0005783];mitochondrial proton-transporting ATP synthase complex [GO:0005753];mitochondrial proton-transporting ATP synthase complex, catalytic core F(1) [GO:0000275];mitochondrion [GO:0005739];nucleolus [GO:0005730];nucleus [GO:0005634]	proton-transporting ATP synthase activity, rotational mechanism [GO:0046933];zinc ion binding [GO:0008270]	+	15	15	15	49.5	49.5	49.5	35.448	0	104.79	5042500000	114	98548000	117540000	48524000	43277000	272260000	324670000	268260000	276040000	145440000	142630000	155030000	67794000	261090000	222340000	245440000	318960000	250400000	214210000	280590000	236080000	289460000	262490000	290360000	211040000	31.1	34.8	19.7
+	1.86631	0.777965	Q8VYR5	Q8VYR5	3144	At4g35850	Pentatricopeptide repeat-containing protein At4g35850, mitochondrial		mitochondrion [GO:0005739]		+	29	29	29	61.9	61.9	61.9	50.456	0	208.13	11505000000	207	731060000	608320000	416520000	453610000	1003800000	1096100000	1185000000	1031200000	326350000	352070000	473880000	132590000	259990000	158660000	123140000	169370000	452440000	286950000	459010000	426080000	208520000	252920000	487860000	409090000	50.2	40.3	50
+	5.16834	0.765454	P22953;F4KCE5	P22953;F4KCE5	1663	HSP70-1;HSC70-1	Heat shock 70 kDa protein 1;Heat shock cognate protein 70-1	cellular response to unfolded protein [GO:0034620];chaperone cofactor-dependent protein refolding [GO:0051085];defense response to bacterium [GO:0042742];defense response to fungus [GO:0050832];defense response to other organism [GO:0098542];negative regulation of seed germination [GO:0010187];protein refolding [GO:0042026];response to cadmium ion [GO:0046686];response to cold [GO:0009409];respon…	apoplast [GO:0048046];cell wall [GO:0005618];chloroplast [GO:0009507];cytoplasm [GO:0005737];cytosol [GO:0005829];cytosolic ribosome [GO:0022626];Golgi apparatus [GO:0005794];nucleolus [GO:0005730];nucleus [GO:0005634];plasma membrane [GO:0005886];plasmodesma [GO:0009506];vacuolar membrane [GO:0005774]	ATP binding [GO:0005524];ATPase activity [GO:0016887];heat shock protein binding [GO:0031072];misfolded protein binding [GO:0051787];protease binding [GO:0002020];protein folding chaperone [GO:0044183];unfolded protein binding [GO:0051082]	+	95	93	37	87.6	87.6	51	71.357	0	323.31	2230200000000	4525	128930000000	128250000000	106050000000	104650000000	114970000000	122240000000	117260000000	121430000000	75387000000	69081000000	79415000000	72347000000	64286000000	74485000000	77376000000	76904000000	94379000000	67276000000	89792000000	96432000000	93455000000	85185000000	83044000000	87589000000	86.5	86.8	86.3
+	3.30236	0.764537	B9DG63	B9DG63	443	At4g28030	AT4G28030 protein			transferase activity, transferring acyl groups [GO:0016746]	+	9	9	9	35.4	35.4	35.4	29.2	0	22.653	2913600000	43	14851000	0	0	16798000	0	17185000	0	0	59004000	44752000	46777000	86122000	206670000	266290000	222920000	153860000	272050000	217920000	317220000	179350000	229810000	203890000	189820000	168260000	7.6	0	0
+	2.13112	0.760285	O48963	O48963	1302	PHOT1	Phototropin-1	chloroplast accumulation movement [GO:0009904];chloroplast avoidance movement [GO:0009903];circadian rhythm [GO:0007623];negative regulation of anion channel activity by blue light [GO:0010362];phototropism [GO:0009638];protein autophosphorylation [GO:0046777];protein phosphorylation [GO:0006468];protein-chromophore linkage [GO:0018298];regulation of proton transport [GO:0010155];regulation of st…	cell surface [GO:0009986];cytoplasm [GO:0005737];cytoplasmic side of plasma membrane [GO:0009898];nucleus [GO:0005634];plasma membrane [GO:0005886];vacuole [GO:0005773]	ATP binding [GO:0005524];blue light photoreceptor activity [GO:0009882];FMN binding [GO:0010181];identical protein binding [GO:0042802];kinase activity [GO:0016301];mRNA binding [GO:0003729];protein kinase activity [GO:0004672];protein serine/threonine kinase activity [GO:0004674]	+	37	37	35	38.6	38.6	35.8	111.69	0	234.17	18636000000	230	0	23578000	0	12276000	9030000	9024000	18955000	9120500	1812100000	1689600000	1950500000	1795900000	980610000	1031100000	896010000	1119800000	789730000	653890000	779630000	796750000	938290000	953930000	1084700000	1281300000	0	3.7	0
+	2.57401	0.758518	O23144	O23144	1204	PPI1	Proton pump-interactor 1	regulation of proton transport [GO:0010155]	cytosol [GO:0005829];endoplasmic reticulum [GO:0005783];endoplasmic reticulum membrane [GO:0005789];integral component of membrane [GO:0016021];plasma membrane [GO:0005886];plasmodesma [GO:0009506]	mRNA binding [GO:0003729]	+	41	41	41	52.5	52.5	52.5	68.878	0	100.32	15472000000	289	964350000	948300000	634660000	570160000	848130000	1019400000	1025300000	1017800000	333590000	418590000	413360000	400740000	567020000	526580000	619310000	482410000	823760000	424390000	736380000	754160000	491790000	445750000	474900000	531610000	44.3	45.3	34.2
+	2.28112	0.758136	Q66GR6	Q66GR6	2405	WHY3	Single-stranded DNA-binding protein WHY3, chloroplastic	defense response [GO:0006952];DNA repair [GO:0006281];regulation of transcription, DNA-templated [GO:0006355]	chloroplast [GO:0009507];chloroplast nucleoid [GO:0042644];chloroplast stroma [GO:0009570];mitochondrion [GO:0005739];plastid chromosome [GO:0009508]	DNA binding [GO:0003677];mRNA binding [GO:0003729];single-stranded DNA binding [GO:0003697]	+	18	18	15	51.9	51.9	44.4	29.728	0	145.55	11381000000	172	99579000	103430000	61494000	97430000	140660000	172150000	85444000	150410000	760750000	722870000	969770000	811050000	293480000	447110000	532040000	521710000	946900000	640110000	1084200000	1149900000	368360000	392760000	432860000	396720000	22.4	25.7	18.3
+	1.45907	0.756109	F4IP94	F4IP94	708	ML2	MEI2-like 2			RNA binding [GO:0003723]	+	8	8	8	12	12	12	91.899	0	10.657	1448500000	46	178580000	162560000	172100000	160300000	137920000	135630000	112120000	122270000	35999000	45007000	76223000	70898000	5034300	5622900	6157200	2312300	0	1174000	5175900	3355100	0	1154200	4948100	4000300	12	10.2	12
+	4.20408	0.755728	P22954	P22954	1664	HSP70-2	Heat shock 70 kDa protein 2	cellular response to unfolded protein [GO:0034620];chaperone cofactor-dependent protein refolding [GO:0051085];protein refolding [GO:0042026];response to bacterium [GO:0009617];response to cadmium ion [GO:0046686];response to heat [GO:0009408];response to unfolded protein [GO:0006986];response to virus [GO:0009615]	cell wall [GO:0005618];cytoplasm [GO:0005737];cytosol [GO:0005829];Golgi apparatus [GO:0005794];nucleus [GO:0005634];plasma membrane [GO:0005886]	ATP binding [GO:0005524];ATPase activity [GO:0016887];heat shock protein binding [GO:0031072];misfolded protein binding [GO:0051787];protein folding chaperone [GO:0044183];unfolded protein binding [GO:0051082]	+	76	32	23	76.4	39.8	31.7	71.386	0	266.65	40886000000	438	1579500000	1489700000	1712700000	1421200000	1122700000	1299400000	1304200000	1226700000	3267500000	2882700000	3676700000	2556100000	1197900000	1451000000	1244700000	1370600000	2157800000	1487700000	1941300000	2008000000	1274700000	958330000	1178100000	1076800000	70.4	69.8	69.7
+	3.47379	0.724818	O49562	O49562	1335	RP1	Pyruvate, phosphate dikinase regulatory protein 1, chloroplastic		chloroplast [GO:0009507];chloroplast stroma [GO:0009570]	ATP binding [GO:0005524];phosphoprotein phosphatase activity [GO:0004721];phosphotransferase activity, phosphate group as acceptor [GO:0016776];protein kinase activity [GO:0004672];protein serine/threonine kinase activity [GO:0004674]	+	38	38	35	83.9	83.9	83.9	43.683	0	323.31	28990000000	376	29908000	57270000	45255000	100530000	67312000	42905000	36113000	46074000	649650000	720190000	752900000	614630000	1689800000	1805900000	1772800000	1843000000	3610100000	2571300000	3239700000	3360600000	1591200000	1392300000	1387900000	1563000000	5.5	9.4	7.2
+	1.39364	0.723992	O80713	O80713	1469	SDR3a	Short-chain dehydrogenase reductase 3a	defense response to bacterium [GO:0042742];plant-type hypersensitive response [GO:0009626]		oxidoreductase activity [GO:0016491]	+	18	18	12	60.7	60.7	48.6	26.9	0	82.607	15653000000	171	1092300000	806750000	608260000	350400000	2553300000	2925000000	1747500000	2495700000	154610000	111360000	182550000	136850000	178720000	313560000	285360000	194770000	136450000	109320000	139620000	181230000	277470000	338770000	181140000	151630000	52.9	45.1	40.9
+	1.78159	0.717199	Q8W4Q4	Q8W4Q4	3250	MRF3	MA3 DOMAIN-CONTAINING TRANSLATION REGULATORY FACTOR 3	ethylene-activated signaling pathway [GO:0009873];negative regulation of transcription, DNA-templated [GO:0045892];regulation of translation [GO:0006417];response to absence of light [GO:0009646];response to carbon starvation [GO:0090549];response to ethylene [GO:0009723];response to salt stress [GO:0009651]	cytoplasm [GO:0005737];cytosol [GO:0005829];Golgi apparatus [GO:0005794];nucleus [GO:0005634]	ribosome binding [GO:0043022]	+	49	49	46	55.4	55.4	53.6	77.435	0	323.31	23622000000	385	1963800000	1948400000	1461300000	1502700000	2773400000	2770900000	2382500000	2657800000	654960000	573370000	677240000	568700000	283230000	260590000	305750000	341960000	357670000	179570000	295410000	281040000	290130000	345050000	351700000	394570000	48.4	54.1	50
+	1.74076	0.714819	O65398	O65398	1402	GLX1	Lactoylglutathione lyase GLX1	methylglyoxal catabolic process to D-lactate via S-lactoyl-glutathione [GO:0019243];response to cadmium ion [GO:0046686]	chloroplast envelope [GO:0009941];cytoplasm [GO:0005737];cytosol [GO:0005829];extracellular region [GO:0005576];peroxisome [GO:0005777];plasma membrane [GO:0005886];secretory vesicle [GO:0099503];vacuole [GO:0005773]	dioxygenase activity [GO:0051213];lactoylglutathione lyase activity [GO:0004462];metal ion binding [GO:0046872]	+	37	35	35	67.1	67.1	67.1	31.928	0	323.31	300640000000	902	14398000000	15557000000	12062000000	12451000000	17876000000	19069000000	18853000000	21097000000	10274000000	9226200000	10774000000	10033000000	7865200000	8911300000	10764000000	10035000000	11730000000	8193900000	12007000000	11072000000	12463000000	12309000000	11892000000	11725000000	62.2	60.1	66.1
+	2.60377	0.708606	F4IC59	F4IC59	653	At1g12230	Aldolase superfamily protein	carbohydrate metabolic process [GO:0005975];pentose-phosphate shunt, non-oxidative branch [GO:0009052]	chloroplast [GO:0009507];chloroplast envelope [GO:0009941];chloroplast stroma [GO:0009570];extracellular region [GO:0005576]	sedoheptulose-7-phosphate:D-glyceraldehyde-3-phosphate glyceronetransferase activity [GO:0004801];zinc ion binding [GO:0008270]	+	22	22	22	41.5	41.5	41.5	46.527	0	240.92	27220000000	257	901250000	895030000	730580000	895210000	2050300000	2143100000	1577800000	1947100000	1422700000	1230100000	1675600000	1555600000	590190000	714520000	719190000	664800000	1246500000	758650000	1150600000	1209300000	787910000	755520000	742150000	856370000	34.4	32.6	34
+	2.85459	0.70704	A0A1P8B8R9	A0A1P8B8R9	265	At4g16660	Heat shock protein 70 (Hsp 70) family protein				+	82	82	82	60.3	60.3	60.3	99.643	0	323.31	64097000000	798	2838600000	3353300000	2901500000	2499400000	5071100000	5107600000	4405900000	5407400000	1219800000	1166800000	1405400000	1897400000	1743100000	2213100000	2844200000	2925000000	1849800000	1604900000	1908800000	2146800000	3048200000	2253500000	2007200000	2278800000	50.6	53.8	51.9
+	2.31861	0.703808	Q9STT3	Q9STT3	5614	T23J7.130	Aldose 1-epimerase	galactose catabolic process via UDP-galactose [GO:0033499];glucose metabolic process [GO:0006006]		aldose 1-epimerase activity [GO:0004034];carbohydrate binding [GO:0030246]	+	14	14	14	44.1	44.1	44.1	39.714	0	123.28	8277900000	134	20461000	7454500	0	6457200	9954200	0	7537000	6588300	618750000	438540000	612930000	619830000	336250000	359580000	443600000	402120000	856780000	560460000	802970000	701280000	369600000	369210000	393400000	334170000	11.5	2.2	0
+	1.7473	0.693291	Q84WV4	Q84WV4	2599	At4g01810	Protein transport protein SEC23	anther wall tapetum development [GO:0048658];COPII-coated vesicle cargo loading [GO:0090110];intracellular protein transport [GO:0006886];pollen exine formation [GO:0010584]	COPII vesicle coat [GO:0030127];cytoplasm [GO:0005737];cytosol [GO:0005829];endoplasmic reticulum exit site [GO:0070971];endoplasmic reticulum membrane [GO:0005789];Golgi membrane [GO:0000139]	GTPase activator activity [GO:0005096];zinc ion binding [GO:0008270]	+	21	21	21	22.6	22.6	22.6	96.003	0	47.284	6734600000	167	879780000	522870000	385700000	449970000	520890000	589610000	467710000	564820000	77004000	84324000	118740000	110310000	121900000	153730000	144440000	110560000	130420000	398990000	124820000	166390000	166690000	182620000	131120000	131160000	16.7	17.3	16.4
+	2.48155	0.675358	Q9FJH6	Q9FJH6	4049	ABCF1	ABC transporter F family member 1		plasma membrane [GO:0005886];plastid [GO:0009536]	ATP binding [GO:0005524];ATPase activity [GO:0016887]	+	46	46	46	54.8	54.8	54.8	66.885	0	323.31	49727000000	585	3425700000	3710400000	2820000000	2840300000	4375000000	4846500000	4036600000	4103200000	785640000	769420000	810000000	824030000	896840000	1092600000	1130400000	1484400000	1963400000	1437200000	2156700000	2103300000	1021800000	1047600000	1002300000	1043500000	52.9	51.8	50.3
+	2.2539	0.673745	Q9LT75	Q9LT75	4702	PTEN2A	Phosphatidylinositol 3,4,5-trisphosphate 3-phosphatase and protein-tyrosine-phosphatase PTEN2A	dephosphorylation [GO:0016311];peptidyl-tyrosine dephosphorylation [GO:0035335];phosphatidylinositol dephosphorylation [GO:0046856];response to osmotic stress [GO:0006970];response to salt stress [GO:0009651]	cytosol [GO:0005829]	phosphatidic acid binding [GO:0070300];phosphatidylinositol phosphate phosphatase activity [GO:0052866];phosphatidylinositol-3,4,5-trisphosphate 3-phosphatase activity [GO:0016314];protein tyrosine phosphatase activity [GO:0004725];protein tyrosine/serine/threonine phosphatase activity [GO:0008138]	+	26	26	25	39.1	39.1	37.8	66.429	0	299.07	12572000000	216	790860000	717200000	485540000	551170000	765170000	908670000	821290000	823460000	334180000	233800000	404280000	234640000	316240000	359650000	428980000	465410000	529050000	330770000	484010000	578820000	501010000	455960000	529460000	522700000	35.4	36.2	31.3
+	2.59941	0.67014	Q9SKK4	Q9SKK4	5442	GSL-OH	Probable 2-oxoacid dependent dioxygenase	glucosinolate biosynthetic process [GO:0019761];regulation of glucosinolate biosynthetic process [GO:0010439]	cytosol [GO:0005829];plasmodesma [GO:0009506];vacuole [GO:0005773]	1-aminocyclopropane-1-carboxylate oxidase activity [GO:0009815];3-butenylglucosinolate 2-hydroxylase activity [GO:0062131];dioxygenase activity [GO:0051213];metal ion binding [GO:0046872]	+	39	39	39	74.9	74.9	74.9	40.351	0	323.31	169140000000	1076	3571200000	5054700000	4348800000	3932200000	12782000000	11326000000	12021000000	11765000000	6618200000	6299100000	7477800000	7061100000	4043900000	4579100000	4192000000	4957200000	11369000000	7597300000	11758000000	10021000000	4837300000	3875700000	4271500000	5380500000	74.9	71.3	68.5
+	1.6849	0.660592	Q9FKV6	Q9FKV6	4105	At5g44320	Eukaryotic translation initiation factor 3 subunit D	cap-dependent translational initiation [GO:0002191];formation of cytoplasmic translation initiation complex [GO:0001732];translational initiation [GO:0006413]	cytosol [GO:0005829];eukaryotic 43S preinitiation complex [GO:0016282];eukaryotic 48S preinitiation complex [GO:0033290];eukaryotic translation initiation factor 3 complex [GO:0005852];plastid [GO:0009536]	mRNA cap binding [GO:0098808];translation initiation factor activity [GO:0003743]	+	45	45	21	67	67	42.9	66.223	0	323.31	43909000000	521	3126800000	4080500000	2823700000	2997400000	4984900000	4660600000	4390700000	5456100000	927550000	915630000	1266100000	913370000	440050000	535970000	530980000	507520000	738650000	491880000	735840000	823830000	580440000	737550000	624630000	617990000	62.9	66.5	51.9
+	2.16635	0.652945	Q9FFF4	Q9FFF4	3895	VAT1	Acetolactate synthase small subunit 1, chloroplastic	isoleucine biosynthetic process [GO:0009097];leucine metabolic process [GO:0006551];regulation of catalytic activity [GO:0050790];valine biosynthetic process [GO:0009099];valine metabolic process [GO:0006573]	acetolactate synthase complex [GO:0005948];chloroplast [GO:0009507];cytosol [GO:0005829];peroxisome [GO:0005777]	acetolactate synthase activity [GO:0003984];acetolactate synthase regulator activity [GO:1990610];protein self-association [GO:0043621]	+	16	14	14	38.6	34.6	34.6	52.33	0	53.29	2773600000	82	151900000	152340000	112340000	105430000	306090000	300060000	209660000	219060000	48032000	7051000	35562000	13223000	45623000	90317000	55742000	65576000	166820000	95333000	193260000	150350000	53274000	49432000	78955000	68130000	25.2	23.1	22.4
+	1.6733	0.649822	O22940	O22940	1186	At2g41800	At2g41800/T11A7.10	negative regulation of unidimensional cell growth [GO:0051511];regulation of cell wall pectin metabolic process [GO:1902066]	cell wall [GO:0005618];plant-type cell wall [GO:0009505];plasmodesma [GO:0009506]		+	10	10	10	38.4	38.4	38.4	40.37	0	37.944	3509400000	60	236920000	284810000	160740000	180410000	489600000	475840000	459760000	455090000	125120000	0	0	0	0	0	0	0	183330000	107670000	145230000	204870000	0	0	0	0	30.3	25.4	15.1
+	1.74209	0.628176	Q9S9P1	Q9S9P1	5181	RPS12A	40S ribosomal protein S12-1	response to cadmium ion [GO:0046686];translation [GO:0006412]	cytosol [GO:0005829];cytosolic ribosome [GO:0022626];cytosolic small ribosomal subunit [GO:0022627];nucleus [GO:0005634];polysomal ribosome [GO:0042788]	structural constituent of ribosome [GO:0003735]	+	18	18	12	68.1	68.1	50	15.377	0	280.51	26003000000	203	2157800000	2233000000	1342700000	1607000000	3076700000	2786800000	2832800000	3354300000	447400000	532320000	463700000	467200000	355630000	268510000	391340000	269540000	427060000	388630000	603950000	618780000	389900000	335670000	364050000	288550000	68.1	68.1	54.9
+	2.69219	0.618648	Q9LXT5	Q9LXT5	4843	T20N10_10	Ribosomal protein L1p/L10e family	maturation of LSU-rRNA [GO:0000470]	90S preribosome [GO:0030686];nucleolus [GO:0005730];ribosome [GO:0005840]	RNA binding [GO:0003723]	+	7	7	7	24.2	24.2	24.2	49.97	0	46.649	1066000000	43	97516000	111830000	71654000	79726000	111020000	157580000	116440000	150450000	6539800	5458200	0	0	8575700	14489000	10577000	9764600	23299000	17770000	18362000	20698000	10332000	6941900	8298800	8683600	19.3	24.2	15.9
+	1.55336	0.615364	Q9SCW1	Q9SCW1	5240	BGAL1	Beta-galactosidase 1	carbohydrate metabolic process [GO:0005975]	apoplast [GO:0048046];cell wall [GO:0005618];cytosol [GO:0005829];plant-type cell wall [GO:0009505];plasmodesma [GO:0009506];vacuole [GO:0005773]	beta-galactosidase activity [GO:0004565];carbohydrate binding [GO:0030246]	+	64	64	61	73.6	73.6	72	93.658	0	323.31	45560000000	464	0	19272000	15394000	16984000	134730000	46768000	28866000	51169000	7209200000	5984600000	9667600000	8607400000	579570000	580830000	719530000	827770000	2222500000	1694700000	2490000000	2315600000	521450000	581760000	600360000	644510000	0	2.5	0.7
+	1.70543	0.61201	P38418	P38418	1744	LOX2	Lipoxygenase 2, chloroplastic	green leaf volatile biosynthetic process [GO:0010597];jasmonic acid biosynthetic process [GO:0009695];lipid oxidation [GO:0034440];oxylipin biosynthetic process [GO:0031408];response to bacterium [GO:0009617];response to fungus [GO:0009620];response to herbivore [GO:0080027];response to jasmonic acid [GO:0009753];response to wounding [GO:0009611]	chloroplast [GO:0009507];chloroplast envelope [GO:0009941];chloroplast stroma [GO:0009570];chloroplast thylakoid membrane [GO:0009535];cytoplasm [GO:0005737];cytosol [GO:0005829]	linoleate 13S-lipoxygenase activity [GO:0016165];metal ion binding [GO:0046872];oxidoreductase activity, acting on single donors with incorporation of molecular oxygen, incorporation of two atoms of oxygen [GO:0016702]	+	21	21	21	30.9	30.9	30.9	102.04	0	44.02	2899100000	90	5512300	0	0	0	0	0	0	7718700	251730000	460820000	226600000	262030000	64851000	76450000	108080000	99992000	224510000	201220000	241490000	258340000	92794000	91937000	102920000	122060000	1.2	0	0
+	1.66935	0.602183	F4HU51	F4HU51	551	At1g01710	Acyl-CoA thioesterase II	acyl-CoA metabolic process [GO:0006637];fatty acid catabolic process [GO:0009062]	peroxisome [GO:0005777]	acyl-CoA hydrolase activity [GO:0047617]	+	20	20	20	47.8	47.8	47.8	48.155	0	64.273	8787900000	207	150610000	244180000	167990000	186060000	265330000	282720000	279640000	263160000	602620000	554110000	581610000	568550000	334180000	350830000	393760000	369930000	377880000	262290000	372210000	370110000	470810000	459940000	433470000	445870000	23	31.9	29.5
+	1.7436	0.59068	Q9SR73	Q9SR73	5545	RPS28A	40S ribosomal protein S28-1	maturation of SSU-rRNA [GO:0030490];ribosomal small subunit assembly [GO:0000028];translation [GO:0006412]	cell wall [GO:0005618];cytosol [GO:0005829];cytosolic ribosome [GO:0022626];cytosolic small ribosomal subunit [GO:0022627];plasma membrane [GO:0005886]	structural constituent of ribosome [GO:0003735]	+	10	5	5	78.1	53.1	53.1	7.3705	0	96.05	6839000000	62	347940000	541760000	470730000	301730000	988710000	820730000	770160000	877110000	132390000	110790000	148480000	148070000	68633000	74393000	66312000	62918000	195280000	117630000	143440000	167450000	75031000	76197000	74895000	58186000	78.1	78.1	78.1
+	3.00408	0.573384	O04153	O04153	1082	CRT3	Calreticulin-3	anthocyanin-containing compound metabolic process [GO:0046283];defense response to bacterium [GO:0042742];endoplasmic reticulum unfolded protein response [GO:0030968];innate immune response-activating signal transduction [GO:0002758];plant-type hypersensitive response [GO:0009626];protein folding [GO:0006457]	endoplasmic reticulum [GO:0005783];endoplasmic reticulum lumen [GO:0005788];endoplasmic reticulum membrane [GO:0005789];extracellular region [GO:0005576]	calcium ion binding [GO:0005509];carbohydrate binding [GO:0030246];unfolded protein binding [GO:0051082]	+	46	46	46	68.9	68.9	68.9	49.843	0	323.31	46355000000	499	175230000	135900000	90651000	85701000	288220000	274940000	283420000	304510000	1714000000	1416300000	1653600000	1226600000	3358700000	3734600000	3708500000	3801700000	2806200000	2159500000	2670900000	2617400000	4069300000	3265300000	3501000000	3012800000	29.5	17.9	12.7
+	3.50336	0.567143	Q9LHS5	Q9LHS5	4466	At5g06110	Cell division related protein-like	cell division [GO:0051301];chromatin silencing [GO:0006342];embryo development ending in seed dormancy [GO:0009793];leaf development [GO:0048366];regulation of flower development [GO:0009909];shoot apical meristem development [GO:1902182]	plasma membrane [GO:0005886]	DNA binding [GO:0003677];histone binding [GO:0042393];ubiquitin binding [GO:0043130]	+	32	22	22	41.6	31.2	31.2	75.632	0	107.21	6209700000	113	441380000	471850000	458950000	397770000	460510000	575270000	570830000	570350000	47649000	61318000	39865000	53090000	143100000	193350000	164730000	138640000	219950000	190640000	159620000	174380000	166250000	169160000	149480000	191550000	25.5	22.8	27.3
+	2.89274	0.565831	F4KHD5	F4KHD5	1060	MPO12.160	A-kinase anchor-like protein	lytic vacuole organization [GO:0080171]	chloroplast [GO:0009507];cytosol [GO:0005829];plasma membrane [GO:0005886]	kinase activity [GO:0016301]	+	189	189	189	69.3	69.3	69.3	323	0	323.31	80738000000	1399	6125400000	7327500000	5408700000	6103600000	5166100000	5387400000	5670500000	5197600000	5857600000	6269600000	6342300000	5599100000	748820000	1033600000	857320000	966720000	992120000	725220000	1163200000	969140000	662980000	578260000	756460000	828960000	57.3	60.3	57.6
+	2.17494	0.557434	Q9FFT4	Q9FFT4	3914	PDC2	Pyruvate decarboxylase 2	cellular response to hypoxia [GO:0071456];response to hypoxia [GO:0001666]	cytosol [GO:0005829];plastid [GO:0009536]	carboxy-lyase activity [GO:0016831];magnesium ion binding [GO:0000287];pyruvate decarboxylase activity [GO:0004737];thiamine pyrophosphate binding [GO:0030976]	+	31	31	28	48.6	48.6	44.5	65.817	0	323.31	51325000000	526	3669400000	4324800000	3344200000	3272000000	2902000000	2962300000	2718200000	2752000000	1249000000	1164500000	1440100000	1324000000	1226100000	1418300000	1659700000	1612700000	1677300000	1334900000	1866300000	1946500000	1795300000	1869900000	1979800000	1815300000	41.7	43.7	43.7
+	2.23158	0.553108	Q8GYN9	Q8GYN9	2688	MENB	1,4-dihydroxy-2-naphthoyl-CoA synthase, peroxisomal	menaquinone biosynthetic process [GO:0009234];phylloquinone biosynthetic process [GO:0042372]	cytosol [GO:0005829];peroxisome [GO:0005777]	1,4-dihydroxy-2-naphthoyl-CoA synthase activity [GO:0008935];isomerase activity [GO:0016853]	+	12	12	12	40.1	40.1	40.1	37.056	0	18.996	2200400000	60	3900500	0	0	0	0	13562000	2861000	5015000	225440000	261680000	211330000	176230000	77842000	127100000	122900000	119920000	132180000	78669000	93781000	136400000	120260000	52840000	117470000	121020000	2.4	0	0
+	4.29244	0.550192	Q9SRG3	Q9SRG3	5548	PDIL1-2	Protein disulfide isomerase-like 1-2	cell redox homeostasis [GO:0045454];photoinhibition [GO:0010205];protein folding [GO:0006457];response to cadmium ion [GO:0046686];response to endoplasmic reticulum stress [GO:0034976];response to high light intensity [GO:0009644]	chloroplast [GO:0009507];chloroplast stroma [GO:0009570];endoplasmic reticulum [GO:0005783];endoplasmic reticulum lumen [GO:0005788];Golgi apparatus [GO:0005794];mitochondrion [GO:0005739];plasma membrane [GO:0005886];secretory vesicle [GO:0099503];vacuolar membrane [GO:0005774]	protein disulfide isomerase activity [GO:0003756]	+	56	49	49	72	70.1	70.1	56.364	0	323.31	65371000000	671	2488000000	2391800000	1970100000	2242900000	3785300000	4675700000	4472100000	4711700000	1133700000	1062600000	1345400000	1488400000	1972300000	2476800000	2768700000	2892100000	3270100000	2228800000	3037200000	3579800000	3042100000	2905900000	2562900000	2866100000	67.1	65.9	66.5
+	1.6247	0.544519	Q9LIA8	Q9LIA8	4471	UGD2	UDP-glucose 6-dehydrogenase 2	carbohydrate metabolic process [GO:0005975];cell wall pectin metabolic process [GO:0052546];glycosaminoglycan biosynthetic process [GO:0006024];UDP-glucuronate biosynthetic process [GO:0006065]	cytosol [GO:0005829];nucleus [GO:0005634];secretory vesicle [GO:0099503]	NAD binding [GO:0051287];UDP-glucose 6-dehydrogenase activity [GO:0003979]	+	67	67	31	94.8	94.8	62.7	53.172	0	323.31	237190000000	1318	19172000000	19223000000	14268000000	14732000000	18284000000	17805000000	17321000000	17336000000	4335900000	4384600000	4615300000	4637400000	5260500000	6526300000	6515300000	6944700000	7548400000	5142500000	7343300000	7626800000	7768800000	7013200000	7536800000	5845900000	94.8	94	88.5
+	2.19171	0.532199	Q9S9N6	Q9S9N6	5179	PNSB1	Photosynthetic NDH subunit of subcomplex B 1, chloroplastic	photosynthetic electron transport in photosystem I [GO:0009773]	chloroplast [GO:0009507];chloroplast thylakoid [GO:0009534];chloroplast thylakoid membrane [GO:0009535];NAD(P)H dehydrogenase complex (plastoquinone) [GO:0010598];nucleus [GO:0005634]		+	10	10	10	22.1	22.1	22.1	51.022	0	8.8996	1230400000	34	0	0	0	0	5959200	0	0	6458900	63323000	38691000	30116000	54892000	32807000	47923000	57356000	48985000	148790000	117030000	156280000	258540000	38758000	38235000	48951000	37316000	0	0	0
+	4.77141	0.527568	Q39241	Q39241	2219	TRX5	Thioredoxin H5	cell redox homeostasis [GO:0045454];defense response to fungus [GO:0050832];response to cadmium ion [GO:0046686];response to microbial phytotoxin [GO:0010188];response to oxidative stress [GO:0006979]	cytosol [GO:0005829];nucleus [GO:0005634];plasma membrane [GO:0005886];plasmodesma [GO:0009506]	oxidoreductase activity, acting on a sulfur group of donors, disulfide as acceptor [GO:0016671]	+	18	18	17	98.3	98.3	85.6	13.122	0	285.1	35764000000	294	2182900000	2224500000	1597300000	1569800000	3593700000	2934400000	3061000000	3574500000	1932700000	1889300000	2115000000	1820000000	487840000	564070000	482910000	630640000	730590000	604620000	813600000	841050000	553400000	539580000	635480000	384860000	98.3	85.6	80.5
+	2.11922	0.520062	O80448	O80448	1433	PDX11	Pyridoxal 5'-phosphate synthase subunit PDX1.1	cellular amino acid metabolic process [GO:0006520];pyridoxal phosphate biosynthetic process [GO:0042823];pyridoxine biosynthetic process [GO:0008615]	chloroplast [GO:0009507];cytosol [GO:0005829];endoplasmic reticulum [GO:0005783]	amine-lyase activity [GO:0016843];protein heterodimerization activity [GO:0046982];pyridoxal 5'-phosphate synthase (glutamine hydrolysing) activity [GO:0036381]	+	26	26	18	53.4	53.4	36.9	32.862	0	323.31	66061000000	394	744030000	715150000	492870000	535000000	828080000	1167300000	1097100000	852500000	3375300000	2602500000	3493700000	3457900000	2890900000	3402600000	3641700000	3371800000	5799000000	3805200000	4144600000	5591000000	3684400000	3678000000	3466000000	3224700000	24.3	24.6	18.1
+	2.08583	0.511315	A2RVW1	A2RVW1	365	At4g33480	At4g33480				+	4	4	4	17.3	17.3	17.3	36.627	0	33.963	490580000	10	0	0	0	0	0	0	0	0	0	0	0	0	39260000	32496000	31805000	45312000	47125000	59595000	54789000	104540000	21168000	14865000	16815000	22815000	0	0	0
+	1.90839	0.502607	P32962	P32962	1723	NIT2	Nitrilase 2	detoxification of nitrogen compound [GO:0051410];indoleacetic acid biosynthetic process [GO:0009684];response to cadmium ion [GO:0046686]	cytosol [GO:0005829];plasma membrane [GO:0005886]	indole-3-acetonitrile nitrilase activity [GO:0080061];indole-3-acetonitrile nitrile hydratase activity [GO:0080109];nitrilase activity [GO:0000257];nitrile hydratase activity [GO:0018822]	+	33	29	24	73.5	61.4	52.8	37.153	0	323.31	141270000000	578	9638000000	11166000000	8891100000	8580900000	8276700000	7419000000	7958700000	8128400000	8918100000	9182300000	8614000000	7704000000	1352700000	1700300000	1652700000	1841700000	7107500000	4778400000	6303000000	5506300000	2042200000	1542800000	1698400000	1268000000	73.5	67.3	73.5
+	3.17687	0.50099	Q9SW18	Q9SW18	5702	CHLM	Magnesium protoporphyrin IX methyltransferase, chloroplastic	chlorophyll biosynthetic process [GO:0015995];methylation [GO:0032259]	chloroplast [GO:0009507];chloroplast envelope [GO:0009941];chloroplast membrane [GO:0031969];chloroplast thylakoid [GO:0009534];chloroplast thylakoid membrane [GO:0009535];cytosol [GO:0005829]	magnesium protoporphyrin IX methyltransferase activity [GO:0046406];methyltransferase activity [GO:0008168]	+	27	27	27	64.1	64.1	64.1	33.795	0	110.18	15795000000	172	539970000	327680000	166980000	278290000	106170000	94684000	166090000	230200000	130120000	112510000	163040000	165090000	871920000	974360000	1166500000	1209600000	1651100000	1123900000	1531300000	1740500000	485730000	956090000	514500000	1088500000	18.6	11.5	9
+	3.81468	0.482113	Q9SI75	Q9SI75	5352	CPEFG	Elongation factor G, chloroplastic	chloroplast organization [GO:0009658];mitochondrial translation [GO:0032543];post-embryonic development [GO:0009791];ribosome disassembly [GO:0032790];seed germination [GO:0009845]	apoplast [GO:0048046];chloroplast [GO:0009507];chloroplast envelope [GO:0009941];chloroplast stroma [GO:0009570];mitochondrion [GO:0005739];nucleus [GO:0005634]	ATP binding [GO:0005524];GTP binding [GO:0005525];GTPase activity [GO:0003924];translation elongation factor activity [GO:0003746]	+	85	85	85	80.1	80.1	80.1	86.057	0	323.31	380040000000	1695	1231800000	1007200000	825140000	911350000	983010000	1319600000	928600000	1154300000	16916000000	14961000000	17386000000	16159000000	19751000000	21390000000	23803000000	23868000000	32071000000	23033000000	33279000000	31579000000	26019000000	24202000000	22905000000	24355000000	41.9	46.2	37.5
+	2.62644	0.472764	Q43348	Q43348	2315	BFRUCT3	Acid beta-fructofuranosidase 3, vacuolar	abscisic acid-activated signaling pathway [GO:0009738];cellular response to gibberellin stimulus [GO:0071370];response to abscisic acid [GO:0009737];response to bacterium [GO:0009617];response to salt stress [GO:0009651];response to water deprivation [GO:0009414];sucrose metabolic process [GO:0005985]	integral component of membrane [GO:0016021];membrane [GO:0016020];plant-type vacuole [GO:0000325];vacuolar lumen [GO:0005775];vacuole [GO:0005773]	sucrose alpha-glucosidase activity [GO:0004575]	+	63	63	56	53.2	53.2	53.2	72.227	0	323.31	347310000000	1203	39050000000	41312000000	33193000000	34117000000	37991000000	38566000000	37292000000	37991000000	3211300000	3409900000	3741500000	4022600000	2062900000	1952400000	2005800000	2268500000	4207700000	3219900000	4175400000	4742100000	2203400000	2016700000	2138500000	2416000000	52.5	53.2	48.5
+	2.52452	0.471909	P57720	P57720	1928	EMB1144	Chorismate synthase, chloroplastic	aromatic amino acid family biosynthetic process [GO:0009073];chorismate biosynthetic process [GO:0009423]	chloroplast [GO:0009507];chloroplast stroma [GO:0009570];cytosol [GO:0005829];nucleolus [GO:0005730];nucleus [GO:0005634];plastid [GO:0009536]	chorismate synthase activity [GO:0004107];FMN binding [GO:0010181]	+	30	30	30	64	64	64	47.317	0	323.31	138440000000	662	12364000000	14074000000	11691000000	11118000000	12288000000	13765000000	12622000000	13463000000	1914900000	1927300000	2509500000	2168400000	2025200000	2038200000	2731200000	2451200000	1970500000	1367500000	2317500000	2170700000	2923100000	2959000000	2560800000	3018700000	64	54.8	54.8
+	3.20054	0.468061	P32068	P32068	1719	ASA1	Anthranilate synthase alpha subunit 1, chloroplastic	regulation of auxin biosynthetic process [GO:0010600];tryptophan biosynthetic process [GO:0000162]	chloroplast [GO:0009507]	anthranilate synthase activity [GO:0004049];metal ion binding [GO:0046872]	+	41	41	37	65.4	65.4	63.2	66.311	0	323.31	25866000000	436	696190000	914640000	752410000	548560000	969940000	1041800000	973910000	1014800000	1798800000	1838300000	1954600000	1628500000	906740000	979940000	913780000	912840000	1183800000	915040000	1027400000	1233400000	1019000000	981120000	959810000	700540000	43.9	46.2	45.2
+	2.56413	0.467645	O24457	O24457	1262	PDH-E1 ALPHA	Pyruvate dehydrogenase E1 component subunit alpha-3, chloroplastic	acetyl-CoA biosynthetic process from pyruvate [GO:0006086];glycolytic process [GO:0006096]	chloroplast [GO:0009507];chloroplast envelope [GO:0009941];chloroplast stroma [GO:0009570];plastid [GO:0009536]	pyruvate dehydrogenase (acetyl-transferring) activity [GO:0004739]	+	55	55	55	73.4	73.4	73.4	47.173	0	323.31	58769000000	704	3750700000	4019100000	3048600000	2963100000	5366700000	4707500000	4843900000	4855000000	977640000	918350000	1207600000	923960000	974780000	1287700000	1257100000	1571700000	2777900000	1756400000	3014800000	3017100000	1320900000	1374100000	1452800000	1381800000	72.9	70.8	66.8
+	1.79087	0.46096	Q940Q8	Q940Q8	3390	IRX10L	Probable beta-1,4-xylosyltransferase IRX10L	cell wall biogenesis [GO:0042546];cell wall organization [GO:0071555];glucuronoxylan biosynthetic process [GO:0010417];plant-type secondary cell wall biogenesis [GO:0009834];protein glycosylation [GO:0006486];xylan biosynthetic process [GO:0045492]	endosome [GO:0005768];Golgi apparatus [GO:0005794];Golgi medial cisterna [GO:0005797];Golgi membrane [GO:0000139];integral component of membrane [GO:0016021];trans-Golgi network [GO:0005802]	1,4-beta-D-xylan synthase activity [GO:0047517];glucuronoxylan glucuronosyltransferase activity [GO:0080116]	+	3	3	3	7.5	7.5	7.5	47.194	0	4.3795	494860000	19	6868900	3929500	5672100	4062000	0	9297400	8635200	9097300	19252000	11931000	13713000	0	23360000	38453000	39786000	31205000	37281000	42242000	48333000	39308000	34159000	28167000	31802000	8304500	3.9	1.9	1.9
+	2.7608	0.44949	Q8GZ99	Q8GZ99	2697	LRR-RLK	At5g49760		integral component of membrane [GO:0016021];plasma membrane [GO:0005886];plastid [GO:0009536];vacuole [GO:0005773]	ATP binding [GO:0005524];protein serine/threonine kinase activity [GO:0004674]	+	19	19	17	18.4	18.4	17.1	104.71	0	92.452	20089000000	239	655260000	628230000	564330000	579160000	591210000	446130000	380440000	508820000	724620000	839270000	868100000	637260000	997430000	1120500000	1245900000	1262200000	748810000	654480000	802820000	870130000	1322400000	1222900000	1183100000	1235200000	13.5	8.4	10.4
+	2.04308	0.449189	Q9FKA4	Q9FKA4	4079	PER62	Peroxidase 62	defense response to fungus [GO:0050832];hydrogen peroxide catabolic process [GO:0042744];response to oxidative stress [GO:0006979]	extracellular region [GO:0005576];Golgi apparatus [GO:0005794];plant-type cell wall [GO:0009505];plasmodesma [GO:0009506]	heme binding [GO:0020037];metal ion binding [GO:0046872];peroxidase activity [GO:0004601]	+	13	13	13	60.2	60.2	60.2	34.133	0	211.63	2175200000	40	3384700	4379600	0	9756100	41795000	39403000	16160000	41528000	517670000	432330000	483720000	540330000	0	0	0	0	8255000	0	6532500	8039000	0	15864000	0	6069900	6.6	6.9	0
+	3.25624	0.426995	Q8LBB2	Q8LBB2	2866	KING1	SNF1-related protein kinase regulatory subunit gamma-1	carbohydrate metabolic process [GO:0005975];fatty acid biosynthetic process [GO:0006633];nitrate assimilation [GO:0042128]		ATP binding [GO:0005524];protein kinase regulator activity [GO:0019887]	+	29	29	29	64.2	64.2	64.2	47.422	0	203.36	33135000000	370	1890400000	2220500000	1544600000	1491700000	2387800000	2691500000	2425200000	2569300000	1426900000	1714900000	1972000000	1893400000	589930000	775590000	806670000	814290000	781010000	458710000	779470000	686380000	785460000	775820000	809420000	843820000	59	63.7	58
+	2.28727	0.403909	O81905	O81905	1550	SD18	Receptor-like serine/threonine-protein kinase SD1-8	protein phosphorylation [GO:0006468];recognition of pollen [GO:0048544]	integral component of membrane [GO:0016021];plasma membrane [GO:0005886];plasmodesma [GO:0009506];vacuole [GO:0005773]	ATP binding [GO:0005524];carbohydrate binding [GO:0030246];protein serine/threonine kinase activity [GO:0004674];transmembrane receptor protein serine/threonine kinase activity [GO:0004675];ubiquitin protein ligase binding [GO:0031625]	+	5	2	2	6	3.2	3.2	96.465	0	10.476	268040000	12	0	0	0	0	0	0	0	0	0	0	20655000	14275000	7524200	92606000	10799000	10028000	8150300	0	21543000	8257900	6384200	8850400	26437000	32534000	1.4	1.4	0
+	2.64146	0.403058	P21240	P21240	1660	CPN60B1	Chaperonin 60 subunit beta 1, chloroplastic	cell death [GO:0008219];chaperone cofactor-dependent protein refolding [GO:0051085];protein folding [GO:0006457];protein refolding [GO:0042026];response to cold [GO:0009409];systemic acquired resistance [GO:0009627]	apoplast [GO:0048046];chloroplast [GO:0009507];chloroplast envelope [GO:0009941];chloroplast stroma [GO:0009570];cytosolic ribosome [GO:0022626];nucleus [GO:0005634];plasma membrane [GO:0005886];stromule [GO:0010319]	ATP binding [GO:0005524];protein domain specific binding [GO:0019904]	+	102	102	39	90.5	90.5	46.2	63.808	0	323.31	687460000000	2387	7872900000	8194400000	6801900000	6954300000	9060700000	9885000000	9213300000	9282300000	52620000000	48484000000	60363000000	59051000000	21337000000	22134000000	26406000000	25969000000	49035000000	38367000000	51077000000	52923000000	28907000000	27510000000	27376000000	28641000000	81.8	74.8	76.3
+	3.28799	0.369424	A0A1P8B3U2	A0A1P8B3U2	216	At4g16260	Glycosyl hydrolase superfamily protein	carbohydrate metabolic process [GO:0005975]		hydrolase activity, hydrolyzing O-glycosyl compounds [GO:0004553]	+	21	21	21	71.7	71.7	71.7	34.653	0	323.31	107200000000	588	8901200000	7696800000	6368400000	6200100000	9047900000	7828400000	9279600000	8904500000	6499700000	5773600000	7465900000	6911400000	545330000	790480000	789940000	813790000	2869500000	2100300000	2708100000	2968500000	806180000	737500000	648360000	548830000	62.9	65.4	63.5
+	2.88441	0.367453	P17597	P17597	1648	ALS	Acetolactate synthase, chloroplastic	isoleucine biosynthetic process [GO:0009097];response to herbicide [GO:0009635];valine biosynthetic process [GO:0009099]	acetolactate synthase complex [GO:0005948];chloroplast [GO:0009507];chloroplast stroma [GO:0009570]	acetolactate synthase activity [GO:0003984];flavin adenine dinucleotide binding [GO:0050660];magnesium ion binding [GO:0000287];thiamine pyrophosphate binding [GO:0030976]	+	35	35	35	54.5	54.5	54.5	72.584	0	323.31	22399000000	324	1130900000	1644100000	1334000000	1183400000	2302400000	3105400000	2520900000	2718100000	117440000	100190000	70514000	82393000	295950000	421710000	380840000	401110000	789690000	522780000	1013900000	847260000	365750000	337020000	367840000	345600000	45.8	49.4	49.9
+	2.49528	0.34747	P42762	P42762	1782	CLPD	Chaperone protein ClpD, chloroplastic	protein-containing complex assembly [GO:0065003]	chloroplast [GO:0009507];chloroplast envelope [GO:0009941];chloroplast stroma [GO:0009570];plastid [GO:0009536]	ATP binding [GO:0005524];ATPase activity [GO:0016887]	+	19	17	17	24.6	22.9	22.9	103.23	0	46.039	2609700000	70	59510000	74277000	48012000	52473000	32686000	78836000	68490000	57090000	361600000	280560000	372700000	372140000	57432000	122430000	78804000	93451000	0	24239000	27195000	21871000	57647000	64579000	118200000	85441000	7.5	9.8	4.3
+	3.34442	-0.300578	O80526	O80526	1449	ACLA-3	ATP-citrate synthase alpha chain protein 3	acetyl-CoA biosynthetic process [GO:0006085];lipid metabolic process [GO:0006629]	citrate lyase complex [GO:0009346];cytosol [GO:0005829];extracellular region [GO:0005576]	ATP binding [GO:0005524];ATP citrate synthase activity [GO:0003878]	+	37	26	26	62.5	52.6	52.6	46.945	0	323.31	49422000000	523	3728800000	3926000000	3117400000	3147900000	4286700000	4309200000	3958000000	3877800000	1447100000	1283000000	1488900000	1139000000	1022200000	1064300000	1080600000	1096200000	809430000	660490000	810160000	823360000	1550200000	1496300000	1700000000	1598400000	61.1	62.5	56.6
+	3.98235	-0.300949	Q9SYG7	Q9SYG7	5741	ALDH7B4	Aldehyde dehydrogenase family 7 member B4	cellular aldehyde metabolic process [GO:0006081];response to abscisic acid [GO:0009737];response to desiccation [GO:0009269];response to salt stress [GO:0009651]	cytosol [GO:0005829]	aldehyde dehydrogenase (NAD+) activity [GO:0004029];glyceraldehyde-3-phosphate dehydrogenase (NAD+) (non-phosphorylating) activity [GO:0043878]	+	57	57	57	80.9	80.9	80.9	54.208	0	323.31	220830000000	1120	12807000000	13030000000	10755000000	11009000000	11430000000	11762000000	9761600000	10368000000	18290000000	15792000000	18889000000	17645000000	2577000000	2808800000	2398800000	3275400000	8546300000	6239700000	8040500000	8550700000	4851800000	4146500000	4064700000	3784700000	80.5	80.9	75.2
+	3.17642	-0.305553	Q9SB81	Q9SB81	5225	PER42	Peroxidase 42	hydrogen peroxide catabolic process [GO:0042744];response to oxidative stress [GO:0006979];rhythmic process [GO:0048511]	extracellular region [GO:0005576];plant-type cell wall [GO:0009505];plasmodesma [GO:0009506]	heme binding [GO:0020037];metal ion binding [GO:0046872];peroxidase activity [GO:0004601]	+	16	16	16	55.8	55.8	55.8	37.294	0	125.05	7693200000	143	123840000	51923000	99447000	59510000	102570000	146710000	123210000	76204000	0	12984000	0	0	379650000	399260000	468800000	407490000	548030000	400070000	581640000	480450000	904560000	678780000	849330000	798690000	21.2	12.4	24.5
+	4.205	-0.331901	Q9FGH3	Q9FGH3	3942	MQJ2.6	Cinnamoyl-CoA reductase-like protein		cytosol [GO:0005829]	oxidoreductase activity [GO:0016491];oxidoreductase activity, acting on the CH-OH group of donors, NAD or NADP as acceptor [GO:0016616]	+	17	17	17	55.2	55.2	55.2	35.757	0	66.949	5271400000	72	409520000	448440000	342300000	410850000	559580000	732970000	621310000	640870000	31349000	57966000	11160000	35890000	69224000	73351000	43546000	106960000	18610000	23535000	22304000	0	162270000	166470000	157650000	125270000	26.5	42.9	24.1
+	2.66566	-0.351092	Q9SAC6	Q9SAC6	5200	GWD1	Alpha-glucan water dikinase 1, chloroplastic	cold acclimation [GO:0009631];response to symbiotic fungus [GO:0009610];starch catabolic process [GO:0005983]	chloroplast [GO:0009507];chloroplast envelope [GO:0009941];chloroplast stroma [GO:0009570];mitochondrion [GO:0005739]	alpha-glucan, water dikinase activity [GO:0050521];ATP binding [GO:0005524];maltodextrin water dikinase [GO:0102216];metal ion binding [GO:0046872];starch, H2O dikinase activity [GO:0102218]	+	131	131	131	64.8	64.8	64.8	156.58	0	323.31	211190000000	1697	723030000	930340000	684190000	691920000	959540000	900050000	826800000	889570000	8759000000	7817300000	9406500000	8429400000	10984000000	12984000000	13954000000	13444000000	11139000000	7924800000	11372000000	11178000000	19709000000	18320000000	19652000000	19514000000	27.2	31.7	23.2
+	2.58153	-0.363293	Q9LNU1	Q9LNU1	4599	CRSP	CO(2)-response secreted protease	negative regulation of defense response to bacterium [GO:1900425];negative regulation of stomatal complex development [GO:2000122];proteolysis [GO:0006508];regulation of stomatal complex development [GO:2000038];response to carbon dioxide [GO:0010037]	apoplast [GO:0048046];cell wall [GO:0005618]	serine-type endopeptidase activity [GO:0004252];serine-type peptidase activity [GO:0008236]	+	16	16	16	21.5	21.5	21.5	81.479	0	62.794	3625100000	105	6932300	20738000	0	0	24629000	41566000	6567200	15597000	40717000	45590000	72499000	63931000	254890000	212410000	173380000	192780000	343830000	237430000	301280000	284790000	381580000	285170000	307810000	310990000	1.8	4.8	0
+	2.47422	-0.366596	Q06327	Q06327	2026	LOX1	Linoleate 9S-lipoxygenase 1	lateral root formation [GO:0010311];lipid oxidation [GO:0034440];oxylipin biosynthetic process [GO:0031408];response to abscisic acid [GO:0009737];response to jasmonic acid [GO:0009753];root development [GO:0048364]	plastid [GO:0009536]	linoleate 9S-lipoxygenase activity [GO:1990136];metal ion binding [GO:0046872];oxidoreductase activity, acting on single donors with incorporation of molecular oxygen, incorporation of two atoms of oxygen [GO:0016702]	+	83	83	83	72.2	72.2	72.2	98.044	0	323.31	64980000000	835	6400100000	6899400000	5438500000	4920800000	5041000000	4577500000	4349000000	4535800000	5097100000	4770400000	6094000000	5295400000	55237000	74448000	50704000	44590000	187400000	100280000	207200000	232720000	136170000	147730000	143530000	180910000	70.8	69.5	68.8
+	2.40231	-0.389243	Q8GY91	Q8GY91	2672	APX6	Putative L-ascorbate peroxidase 6	cellular response to oxidative stress [GO:0034599];hydrogen peroxide catabolic process [GO:0042744];response to reactive oxygen species [GO:0000302];seed germination [GO:0009845];seed maturation [GO:0010431]	cytosol [GO:0005829]	heme binding [GO:0020037];L-ascorbate peroxidase activity [GO:0016688];metal ion binding [GO:0046872];peroxidase activity [GO:0004601]	+	5	5	5	21	21	21	36.239	0	20.407	1040300000	24	0	0	0	0	0	0	0	0	0	14167000	20837000	32911000	69068000	85673000	75123000	83922000	30686000	27345000	45039000	53882000	118650000	121430000	132900000	128640000	0	0	0
+	5.91666	-0.3985	Q9M356	Q9M356	5038	F15G16.210	Eukaryotic aspartyl protease family protein	protein catabolic process [GO:0030163];proteolysis [GO:0006508]	cytosol [GO:0005829];plant-type cell wall [GO:0009505];plasmodesma [GO:0009506]	aspartic-type endopeptidase activity [GO:0004190]	+	20	20	19	46.6	46.6	44.9	51.461	0	323.31	25359000000	274	411790000	376300000	295400000	256410000	1022600000	858540000	829230000	907390000	392610000	466460000	474120000	285830000	1432900000	1444700000	1431100000	1540900000	1267100000	940560000	1164200000	1163400000	2066700000	1889000000	2180900000	2260500000	38.1	25.1	30.8
+	5.51632	-0.400831	Q9C6B9	Q9C6B9	3705	NMT3	Phosphoethanolamine N-methyltransferase 3	diacylglycerol biosynthetic process [GO:0006651];methylation [GO:0032259];phosphatidylcholine biosynthetic process [GO:0006656];phosphatidylethanolamine metabolic process [GO:0046337];pollen development [GO:0009555];triglyceride biosynthetic process [GO:0019432]	cytoplasm [GO:0005737]	phosphoethanolamine N-methyltransferase activity [GO:0000234]	+	54	43	43	65.1	55.5	55.5	56.367	0	323.31	36621000000	387	343710000	419410000	352090000	350650000	352530000	478980000	428340000	467760000	61491000	58774000	44817000	41455000	1204700000	1485600000	1542200000	1465400000	3364400000	2638100000	3269000000	3394300000	3829600000	3685700000	3824400000	3518100000	39.2	48.2	45.9
+	3.80957	-0.407742	P93836	P93836	1999	HPD	4-hydroxyphenylpyruvate dioxygenase	L-phenylalanine catabolic process [GO:0006559];tyrosine catabolic process [GO:0006572]	cytosol [GO:0005829]	4-hydroxyphenylpyruvate dioxygenase activity [GO:0003868];identical protein binding [GO:0042802];metal ion binding [GO:0046872]	+	34	34	34	70.3	70.3	70.3	48.815	0	323.31	24573000000	331	624360000	708070000	454590000	591200000	338460000	283290000	240440000	268250000	3406800000	3246300000	3433700000	3177800000	385320000	437190000	406130000	358520000	884370000	642700000	998980000	1020200000	679800000	628870000	647190000	710320000	52.8	53.3	42.9
+	7.30914	-0.412037	P42801	P42801	1789	IPS1	Inositol-3-phosphate synthase isozyme 1	embryo development ending in seed dormancy [GO:0009793];inositol biosynthetic process [GO:0006021];myo-inositol hexakisphosphate biosynthetic process [GO:0010264];phosphatidylserine biosynthetic process [GO:0006659];post-embryonic development [GO:0009791]	cytoplasm [GO:0005737];nucleus [GO:0005634]	inositol-3-phosphate synthase activity [GO:0004512]	+	39	39	15	66.1	66.1	30.9	56.514	0	323.31	40475000000	398	2956800000	2890800000	2348500000	2106600000	1267800000	1160900000	1044300000	1204500000	99234000	81597000	99876000	94985000	946850000	1150100000	1127500000	1204600000	2734200000	1761300000	2477800000	3170300000	2901100000	2749800000	2572400000	2323700000	63	63.4	62.8
+	2.12099	-0.413806	Q9FE68	Q9FE68	3871	UGT71C5	UDP-glycosyltransferase 71C5	abscisic acid homeostasis [GO:1902265];abscisic acid metabolic process [GO:0009687];drought recovery [GO:0009819];positive regulation of seed germination [GO:0010030]	cytosol [GO:0005829];intracellular membrane-bounded organelle [GO:0043231]	abscisic acid glucosyltransferase activity [GO:0010294];quercetin 3-O-glucosyltransferase activity [GO:0080043];UDP-glycosyltransferase activity [GO:0008194]	+	23	23	23	52.1	52.1	52.1	52.646	0	123.03	18638000000	236	1241000000	1315700000	946920000	1190600000	1065800000	1078700000	1057400000	1177200000	585070000	656840000	574270000	472730000	439400000	675140000	553990000	663590000	262170000	297410000	621090000	570150000	991640000	658060000	715360000	827590000	51	51.9	46.7
+	2.00589	-0.427169	Q9SD76	Q9SD76	5256	PHS2	Alpha-glucan phosphorylase 2, cytosolic	glycogen catabolic process [GO:0005980];response to cadmium ion [GO:0046686];response to water deprivation [GO:0009414]	chloroplast [GO:0009507];cytoplasm [GO:0005737];cytosol [GO:0005829]	1,4-alpha-oligoglucan phosphorylase activity [GO:0004645];glycogen phosphorylase activity [GO:0008184];linear malto-oligosaccharide phosphorylase activity [GO:0102250];pyridoxal phosphate binding [GO:0030170];SHG alpha-glucan phosphorylase activity [GO:0102499]	+	67	66	66	75.3	73.4	73.4	95.158	0	323.31	49088000000	633	552580000	490820000	278480000	436570000	255300000	727020000	463400000	489020000	2077300000	2157400000	2530900000	1679300000	2659000000	2996700000	3071400000	3328200000	1545100000	1711100000	2081600000	1656400000	4775800000	4408100000	4615500000	4100900000	32.9	25.1	28.8
+	2.18601	-0.431858	Q9SU72	Q9SU72	5630	EDS1	Protein EDS1	aerenchyma formation [GO:0010618];defense response to Gram-negative bacterium [GO:0050829];leaf abscission [GO:0060866];lipid metabolic process [GO:0006629];plant-type hypersensitive response [GO:0009626];positive regulation of cell death [GO:0010942];regulation of hydrogen peroxide metabolic process [GO:0010310];response to hypoxia [GO:0001666];response to singlet oxygen [GO:0000304];systemic ac…	cytoplasm [GO:0005737];endoplasmic reticulum [GO:0005783];nucleus [GO:0005634]	lipase activity [GO:0016298];protein homodimerization activity [GO:0042803]	+	34	34	34	51.7	51.7	51.7	71.689	0	77.435	9925800000	217	461070000	369960000	328610000	322490000	464080000	362450000	375100000	399630000	367780000	301520000	400200000	377800000	396680000	507600000	462640000	489870000	306100000	206360000	308900000	305370000	634450000	576660000	625320000	575200000	31.8	33.4	31.8
+	2.48715	-0.433475	Q9LQQ3	Q9LQQ3	4641	At1g07750	At1g07750/F24B9_13		cytosol [GO:0005829];extracellular region [GO:0005576];Golgi apparatus [GO:0005794];plasmodesma [GO:0009506]	copper ion binding [GO:0005507];nutrient reservoir activity [GO:0045735];zinc ion binding [GO:0008270]	+	36	36	36	73	73	73	38.31	0	323.31	59171000000	573	3600500000	3785400000	2778800000	2624000000	4596000000	5029200000	4772900000	4769700000	1250100000	1219200000	1470500000	1467700000	1305900000	1569600000	1750100000	1837900000	1593500000	1151200000	1918500000	1683000000	2403100000	1976600000	2305800000	2311600000	64.3	71.9	61.5
+	3.7011	-0.44806	O49607	O49607	1339	SBT1.6	Subtilisin-like protease SBT1.6	plant-type cell wall modification [GO:0009827]	plasma membrane [GO:0005886]	serine-type endopeptidase activity [GO:0004252];serine-type peptidase activity [GO:0008236]	+	24	24	24	33.2	33.2	33.2	81.045	0	144.92	14027000000	181	147040000	194630000	174670000	148680000	247760000	276540000	305260000	281890000	99658000	128180000	139720000	160070000	634050000	828240000	957490000	851170000	755140000	408780000	848450000	955000000	1449400000	1333500000	1304900000	1396900000	13.2	13.6	11.3
+	2.17584	-0.449292	O49482	O49482	1325	CAD5	Cinnamyl alcohol dehydrogenase 5	lignin biosynthetic process [GO:0009809]	cytosol [GO:0005829]	cinnamyl-alcohol dehydrogenase activity [GO:0045551];oxidoreductase activity, acting on the CH-OH group of donors, NAD or NADP as acceptor [GO:0016616];sinapyl alcohol dehydrogenase activity [GO:0052747];zinc ion binding [GO:0008270]	+	39	37	37	94.7	94.7	94.7	38.743	0	323.31	53610000000	463	6555900000	7190100000	5072400000	5048500000	4653300000	4217000000	4103000000	4244400000	509930000	628090000	614090000	665050000	351460000	374880000	274360000	427950000	1609500000	1274200000	1784100000	1510000000	641420000	650770000	584310000	625490000	84	92.4	88.5
+	2.8001	-0.455607	Q9SLA8	Q9SLA8	5465	MOD1	Enoyl-[acyl-carrier-protein] reductase [NADH], chloroplastic	fatty acid biosynthetic process [GO:0006633]	chloroplast [GO:0009507];chloroplast envelope [GO:0009941];chloroplast stroma [GO:0009570];fatty acid synthase complex [GO:0005835];mitochondrion [GO:0005739];thylakoid [GO:0009579]	copper ion binding [GO:0005507];enoyl-[acyl-carrier-protein] reductase (NADH) activity [GO:0004318];enoyl-[acyl-carrier-protein] reductase activity [GO:0016631]	+	30	30	30	59.5	59.5	59.5	41.213	0	323.31	112220000000	703	3305200000	3842800000	3271100000	2957300000	4772900000	4780900000	4224900000	4668400000	7602800000	7553400000	9289400000	8932800000	2701700000	3058900000	3628500000	2938200000	4358000000	2853100000	4099500000	4471600000	4318200000	5481700000	4551300000	4558900000	57.7	59.5	56.7
+	1.85007	-0.461101	Q9FI56	Q9FI56	4000	CLPC1	Chaperone protein ClpC1, chloroplastic	chloroplast organization [GO:0009658];protein import into chloroplast stroma [GO:0045037];protein targeting to chloroplast [GO:0045036];regulation of chlorophyll biosynthetic process [GO:0010380]	cell wall [GO:0005618];chloroplast [GO:0009507];chloroplast envelope [GO:0009941];chloroplast inner membrane [GO:0009706];chloroplast stroma [GO:0009570];chloroplast thylakoid membrane [GO:0009535];mitochondrion [GO:0005739];plastid [GO:0009536];plastid stroma [GO:0009532];Tic complex [GO:0031897]	ATP binding [GO:0005524];ATP-dependent peptidase activity [GO:0004176]	+	101	101	45	73.3	73.3	31	103.45	0	323.31	194560000000	1557	8118900000	8702200000	7207100000	7680800000	11069000000	12149000000	10199000000	11508000000	7878000000	8043900000	7906500000	7842300000	6078600000	7091700000	6776300000	6610100000	5440100000	3872200000	5130700000	5165300000	10294000000	10343000000	9533400000	9923400000	68.2	65	62.2
+	2.04233	-0.465919	Q9C7W7	Q9C7W7	3742	UGE4	UDP-glucose 4-epimerase 4	cell wall biogenesis [GO:0042546];cell wall organization [GO:0071555];galactose metabolic process [GO:0006012];plant-type cell wall biogenesis [GO:0009832];root epidermal cell differentiation [GO:0010053];rRNA processing [GO:0006364];xyloglucan biosynthetic process [GO:0009969]	cytosol [GO:0005829];Golgi stack [GO:0005795]	RNA binding [GO:0003723];UDP-glucose 4-epimerase activity [GO:0003978]	+	22	22	22	63.5	63.5	63.5	38.123	0	206.81	15382000000	184	1790300000	1715400000	1578100000	1352400000	2008900000	1764400000	1686500000	1879700000	138040000	118800000	151060000	186820000	63181000	64810000	80627000	91234000	25740000	3857100	48496000	25199000	129500000	149340000	143970000	185280000	63.5	58.3	55.5
+	2.67388	-0.46731	P25858	P25858	1685	GAPC1	Glyceraldehyde-3-phosphate dehydrogenase GAPC1, cytosolic	fruit development [GO:0010154];gluconeogenesis [GO:0006094];glycolytic process [GO:0006096];response to cadmium ion [GO:0046686];response to heat [GO:0009408];response to hydrogen peroxide [GO:0042542];response to oxidative stress [GO:0006979];response to redox state [GO:0051775];response to sucrose [GO:0009744];seed development [GO:0048316]	apoplast [GO:0048046];chloroplast [GO:0009507];cytosol [GO:0005829];mitochondrial envelope [GO:0005740];mitochondrion [GO:0005739];nucleus [GO:0005634];plasma membrane [GO:0005886];vacuolar membrane [GO:0005774]	copper ion binding [GO:0005507];DNA binding [GO:0003677];glyceraldehyde-3-phosphate dehydrogenase (NAD+) (phosphorylating) activity [GO:0004365];glyceraldehyde-3-phosphate dehydrogenase (NADP+) (non-phosphorylating) activity [GO:0008886];NAD binding [GO:0051287];NADP binding [GO:0050661]	+	86	86	36	98.8	98.8	68.9	36.914	0	323.31	4019100000000	6223	244250000000	265350000000	222760000000	224580000000	251710000000	271610000000	247110000000	235780000000	110260000000	97036000000	127620000000	112370000000	101430000000	127880000000	123050000000	123390000000	130190000000	88309000000	132510000000	133370000000	161710000000	165400000000	157840000000	163560000000	98.8	98.8	98.8
+	1.86627	-0.467512	O80731	O80731	1471	PAE3	Pectin acetylesterase 3	cell wall organization [GO:0071555]	extracellular region [GO:0005576];plant-type cell wall [GO:0009505]	carboxylic ester hydrolase activity [GO:0052689];pectin acetylesterase activity [GO:0052793]	+	22	22	22	61.5	61.5	61.5	45.944	0	285.02	12753000000	257	327370000	283100000	164290000	194030000	362070000	371110000	349060000	358840000	462510000	520650000	461550000	377350000	658550000	684120000	615950000	737550000	511110000	343500000	483560000	659430000	1048100000	756810000	1021000000	1001700000	49.3	51.2	32.5
+	1.99371	-0.472153	Q9LMK7	Q9LMK7	4572	RANBP1A	Ran-binding protein 1 homolog a	intracellular transport [GO:0046907];mRNA transport [GO:0051028];positive regulation of GTPase activity [GO:0043547];protein transport [GO:0015031]	cytoplasm [GO:0005737];cytosol [GO:0005829];extracellular region [GO:0005576];nuclear pore [GO:0005643];nucleus [GO:0005634]	Ran GTPase binding [GO:0008536]	+	37	37	28	84.2	84.2	80.3	25.601	0	323.31	63663000000	571	3796600000	4020000000	3278700000	3248200000	4941300000	4605200000	4492500000	4248300000	2866900000	3014900000	3080400000	2920400000	1241200000	1258000000	1612500000	1243800000	1237300000	1039800000	1579500000	1599600000	2069800000	2149200000	2107400000	2011300000	83.8	80.7	80.7
+	2.71673	-0.476339	Q9M156	Q9M156	4968	UGT72B1	UDP-glycosyltransferase 72B1	lignin biosynthetic process [GO:0009809];response to toxic substance [GO:0009636];xenobiotic catabolic process [GO:0042178];xenobiotic metabolic process [GO:0006805]	intracellular membrane-bounded organelle [GO:0043231]	hydroquinone glucosyltransferase activity [GO:0050505];UDP-glucosyltransferase activity [GO:0035251];UDP-glycosyltransferase activity [GO:0008194]	+	36	36	33	59	59	54.2	52.929	0	289.14	28087000000	349	3201000000	3501700000	2759900000	2557000000	2492000000	2452500000	2424900000	2770500000	174630000	133670000	168760000	121130000	333710000	421790000	379040000	429560000	163980000	76999000	126360000	216420000	777810000	717820000	750940000	935180000	55.4	51.7	49.6
+	2.07162	-0.478159	Q9SGE0	Q9SGE0	5309	AXS2	UDP-D-apiose/UDP-D-xylose synthase 2	cell wall organization [GO:0071555]	apoplast [GO:0048046];cytoplasm [GO:0005737];cytosol [GO:0005829];extracellular region [GO:0005576]	catalytic activity [GO:0003824]	+	48	48	19	82.5	82.5	42.2	43.79	0	323.31	105120000000	819	7414800000	7587600000	5752700000	5724000000	9249900000	8272200000	7650900000	8289400000	1710100000	1365700000	1737200000	1476500000	2279900000	2787400000	2838300000	2808600000	3691300000	2406400000	3685700000	3481200000	3356200000	3795100000	3796500000	3959200000	82.5	77.4	80.2
+	2.66034	-0.478357	Q9LZE4	Q9LZE4	4898	At5g03430	Phosphoadenosine phosphosulfate (PAPS) reductase family protein	FAD biosynthetic process [GO:0006747]		FMN adenylyltransferase activity [GO:0003919]	+	20	20	20	41.9	41.9	41.9	55.38	0	113.64	6120500000	190	175770000	225930000	174310000	182380000	282730000	283860000	256990000	243710000	176710000	145470000	187970000	173080000	236060000	196870000	263240000	224040000	364400000	258330000	327220000	337720000	420630000	318560000	362450000	302080000	20.9	25.6	19.5
+	2.73912	-0.481405	Q9LUT2	Q9LUT2	4753	METK4	S-adenosylmethionine synthase 4	lignin biosynthetic process [GO:0009809];methionine metabolic process [GO:0006555];one-carbon metabolic process [GO:0006730];response to cold [GO:0009409];S-adenosylmethionine biosynthetic process [GO:0006556]	cell wall [GO:0005618];cytosol [GO:0005829];nucleolus [GO:0005730];plasma membrane [GO:0005886];plasmodesma [GO:0009506]	ATP binding [GO:0005524];metal ion binding [GO:0046872];methionine adenosyltransferase activity [GO:0004478];mRNA binding [GO:0003729]	+	61	32	32	98	78.1	78.1	42.795	0	323.31	293190000000	1001	26850000000	30095000000	25986000000	24386000000	28511000000	30610000000	28124000000	29347000000	2885900000	2424900000	3149500000	3087400000	3834700000	4630700000	3988400000	4747700000	4081100000	2947700000	4319000000	4600900000	6502700000	5697200000	6203000000	6182300000	98	98	98
+	1.99516	-0.488584	Q84MB6	Q84MB6	2555	At3g50210	Probable 2-oxoglutarate-dependent dioxygenase At3g50210			dioxygenase activity [GO:0051213];metal ion binding [GO:0046872]	+	18	18	17	53.6	53.6	51.5	37.221	0	56.364	9369300000	155	966200000	838490000	742530000	686210000	692860000	769030000	642750000	782870000	176440000	215610000	256730000	202150000	158050000	210550000	199570000	207190000	105910000	76602000	124800000	167180000	292330000	330980000	255780000	268430000	51.2	46.4	46.4
+	3.50529	-0.493079	Q9SEE5	Q9SEE5	5270	GAL1	Galactokinase	carbohydrate phosphorylation [GO:0046835];galactose metabolic process [GO:0006012]	cytosol [GO:0005829]	ATP binding [GO:0005524];galactokinase activity [GO:0004335];galactose binding [GO:0005534];metal ion binding [GO:0046872]	+	35	35	35	64.5	64.5	64.5	54.34	0	323.31	24986000000	337	2076900000	2497900000	1682000000	1747500000	2921500000	2884000000	2641800000	2756600000	290510000	329460000	338260000	284360000	320840000	385000000	393300000	445080000	63434000	94849000	81453000	75188000	768550000	562880000	737890000	606650000	61.5	63.5	60.7
+	2.55232	-0.49392	Q682S0	Q682S0	2430	RPT2	Root phototropism protein 2	phototropism [GO:0009638];protein ubiquitination [GO:0016567];signal transduction [GO:0007165]	cytoplasm [GO:0005737];nucleus [GO:0005634];peroxisome [GO:0005777]		+	8	8	8	12.3	12.3	12.3	65.854	0	22.473	943250000	44	11058000	7578700	13301000	2641800	5923300	19020000	64373000	67122000	1708100	1943600	19881000	6712800	14958000	23315000	18401000	66513000	123100000	71078000	120960000	111630000	55469000	36017000	34492000	46050000	3.4	3.5	2.9
+	2.4488	-0.49725	Q96255	Q96255	3596	PSAT1	Phosphoserine aminotransferase 1, chloroplastic	L-serine biosynthetic process [GO:0006564]	chloroplast [GO:0009507];chloroplast stroma [GO:0009570];cytoplasm [GO:0005737];plastid [GO:0009536]	O-phospho-L-serine:2-oxoglutarate aminotransferase activity [GO:0004648];protein homodimerization activity [GO:0042803];pyridoxal phosphate binding [GO:0030170]	+	49	49	28	64.2	64.2	44.7	47.359	0	323.31	212520000000	1130	18252000000	19222000000	14911000000	14754000000	16186000000	17001000000	16351000000	17290000000	4190900000	3595200000	4393800000	3691300000	3554900000	4379400000	4842900000	5044800000	6067700000	3837300000	6127000000	5936400000	6094100000	5539200000	5602800000	5657300000	62.8	62.8	64
+	1.79965	-0.500838	Q94AH9	Q94AH9	3475	FIB2	rRNA 2'-O-methyltransferase fibrillarin 2	box C/D snoRNA 3'-end processing [GO:0000494];defense response [GO:0006952];histone glutamine methylation [GO:1990258];rRNA methylation [GO:0031167]	box C/D snoRNP complex [GO:0031428];Cajal body [GO:0015030];cytosol [GO:0005829];mediator complex [GO:0016592];nucleolus [GO:0005730];small-subunit processome [GO:0032040]	histone-glutamine methyltransferase activity [GO:1990259];ribonuclease activity [GO:0004540];RNA binding [GO:0003723];rRNA methyltransferase activity [GO:0008649];snoRNA binding [GO:0030515]	+	35	35	3	57.2	57.2	8.1	33.653	0	248.13	30988000000	277	2037500000	2592900000	2062400000	1982600000	4014300000	5140000000	3997600000	4664300000	137460000	58432000	55569000	75036000	210310000	178500000	213830000	293980000	347580000	286300000	353230000	362290000	389500000	467550000	473020000	593560000	53.8	55.9	55.9
+	1.69619	-0.508101	Q9LK23	Q9LK23	4526	G6PD5	Glucose-6-phosphate 1-dehydrogenase 5, cytoplasmic	glucose metabolic process [GO:0006006];pentose-phosphate shunt, oxidative branch [GO:0009051];response to cadmium ion [GO:0046686]	chloroplast [GO:0009507];cytosol [GO:0005829]	glucose-6-phosphate dehydrogenase activity [GO:0004345];NADP binding [GO:0050661]	+	63	47	47	77.5	61.4	61.4	59.156	0	323.31	41759000000	551	2035800000	2505200000	2174800000	1866700000	3738700000	3511900000	2959000000	3193900000	1194800000	1121800000	1225600000	1101500000	702860000	991580000	1292700000	1092700000	1353100000	902090000	1324600000	1279000000	1574000000	1502200000	1541900000	1572700000	70.3	70.3	73.3
+	5.09535	-0.509619	Q9SPK5	Q9SPK5	5514	THFS	Formate--tetrahydrofolate ligase	10-formyltetrahydrofolate biosynthetic process [GO:0009257];purine nucleobase biosynthetic process [GO:0009113];response to cadmium ion [GO:0046686];tetrahydrofolate interconversion [GO:0035999]	apoplast [GO:0048046];chloroplast [GO:0009507];cytoplasm [GO:0005737];cytosol [GO:0005829];nucleus [GO:0005634];plasma membrane [GO:0005886]	ATP binding [GO:0005524];copper ion binding [GO:0005507];formate-tetrahydrofolate ligase activity [GO:0004329];methenyltetrahydrofolate cyclohydrolase activity [GO:0004477];methylenetetrahydrofolate dehydrogenase (NADP+) activity [GO:0004488]	+	57	57	57	84.4	84.4	84.4	67.801	0	323.31	89677000000	815	5547000000	5720100000	4368300000	4074500000	6382500000	6308000000	5821100000	6961900000	2122200000	2268800000	1509800000	1387600000	2717700000	3633300000	2995200000	3271900000	1355700000	1343700000	1400200000	1210800000	5448000000	5345100000	4256800000	4226500000	80.9	68.3	65.5
+	3.13919	-0.509733	Q9LML6	Q9LML6	4575	UGT71C4	Flavonol 3-O-glucosyltransferase UGT71C4		intracellular membrane-bounded organelle [GO:0043231]	daphnetin 3-O-glucosyltransferase activity [GO:0102360];flavonol 3-O-glucosyltransferase activity [GO:0047893];flavonol 7-O-beta-glucosyltransferase activity [GO:0033836];myricetin 3-O-glucosyltransferase activity [GO:0102425];quercetin 3-O-glucosyltransferase activity [GO:0080043];quercetin 7-O-glucosyltransferase activity [GO:0080044];UDP-glucosyltransferase activity [GO:0035251];UDP-glycosyltr…	+	23	23	23	53.4	53.4	53.4	52.843	0	106.94	4946100000	139	391460000	364620000	347860000	232980000	479540000	512420000	415850000	438410000	87779000	60923000	87708000	130820000	90899000	116730000	94314000	99574000	23662000	22784000	35184000	0	251430000	201040000	224510000	235570000	40.5	41.3	40.9
+	1.91808	-0.510217	Q9LS39	Q9LS39	4666	CCR4-3	Carbon catabolite repressor protein 4 homolog 3		cytoplasm [GO:0005737];nucleus [GO:0005634]	3'-5'-exoribonuclease activity [GO:0000175];metal ion binding [GO:0046872];poly(A)-specific ribonuclease activity [GO:0004535];RNA binding [GO:0003723]	+	9	9	9	26.8	26.8	26.8	50.321	0	23.053	1890100000	45	0	0	0	0	0	0	8009200	0	110460000	75801000	116740000	37902000	125800000	151440000	135410000	149740000	73702000	83028000	77958000	48902000	189990000	162130000	158130000	184990000	0	0	0
+	2.42626	-0.513948	Q9SSA5	Q9SSA5	5579	CYP38	Peptidyl-prolyl cis-trans isomerase CYP38, chloroplastic	defense response to bacterium [GO:0042742]	chloroplast [GO:0009507];chloroplast stroma [GO:0009570];chloroplast thylakoid [GO:0009534];chloroplast thylakoid lumen [GO:0009543];chloroplast thylakoid membrane [GO:0009535];cytosol [GO:0005829];thylakoid [GO:0009579];thylakoid lumen [GO:0031977]	peptidyl-prolyl cis-trans isomerase activity [GO:0003755]	+	36	36	36	74.1	74.1	74.1	47.981	0	323.31	108080000000	724	153390000	133780000	123400000	67880000	109920000	127130000	128390000	71935000	5612600000	5530900000	5675100000	5711000000	6148500000	7122500000	6725500000	6857500000	4970300000	3397500000	4457600000	5061600000	10082000000	9654500000	9607200000	10551000000	9.6	9.2	9.2
+	2.69714	-0.516503	O04496	O04496	1108	AED3	Aspartyl protease AED3	protein catabolic process [GO:0030163];proteolysis [GO:0006508];regulation of programmed cell death [GO:0043067];systemic acquired resistance [GO:0009627]	apoplast [GO:0048046];cell wall [GO:0005618];secretory vesicle [GO:0099503]	aspartic-type endopeptidase activity [GO:0004190];nucleotide binding [GO:0000166]	+	20	20	20	38.8	38.8	38.8	47.661	0	323.31	193030000000	481	127090000	216490000	140380000	207560000	387600000	456960000	334880000	414730000	16089000000	15876000000	17269000000	17188000000	5924400000	8756100000	10070000000	10241000000	9289900000	6683200000	10209000000	10392000000	13797000000	13019000000	13308000000	12631000000	22.5	25.8	23.4
+	2.00251	-0.517691	Q9M1D0	Q9M1D0	4973	BGLU16	Beta-glucosidase 16	carbohydrate metabolic process [GO:0005975];glucosinolate catabolic process [GO:0019762];response to salt stress [GO:0009651]		beta-glucosidase activity [GO:0008422];scopolin beta-glucosidase activity [GO:0102483]	+	22	22	22	43.4	43.4	43.4	58.042	0	129.1	10473000000	250	429750000	392560000	447320000	306580000	554980000	598330000	442100000	444740000	741370000	756850000	933670000	837830000	221260000	284730000	206070000	262740000	239650000	187370000	214220000	336550000	454700000	301860000	412390000	465540000	31.9	25.5	28.6
+	1.70559	-0.518791	P26568	P26568	1689	At1g06760	Histone H1.1	chromosome condensation [GO:0030261];negative regulation of chromatin silencing [GO:0031936];negative regulation of DNA recombination [GO:0045910];nucleosome assembly [GO:0006334];nucleosome positioning [GO:0016584];regulation of transcription, DNA-templated [GO:0006355]	host cell nucleus [GO:0042025];nucleosome [GO:0000786];nucleus [GO:0005634]	double-stranded DNA binding [GO:0003690];nucleosomal DNA binding [GO:0031492]	+	24	17	17	43.4	35.8	35.8	28.946	0	24.6	4107800000	149	61176000	42215000	51983000	72586000	206090000	243380000	118890000	208450000	100730000	95486000	90522000	124680000	181740000	213220000	97251000	118150000	269230000	305480000	298390000	315940000	223140000	220460000	206360000	242260000	26.6	27.4	20.8
+	3.26062	-0.521354	Q8GUK4	Q8GUK4	2621	SBT3.13	Subtilisin-like protease SBT3.13		cytosol [GO:0005829];extracellular space [GO:0005615]	serine-type endopeptidase activity [GO:0004252]	+	25	25	19	40.3	40.3	32.4	81.479	0	203.51	12991000000	258	187980000	161950000	119450000	117460000	76559000	101370000	106240000	85873000	755910000	648650000	811040000	735700000	663480000	747370000	809890000	797650000	410700000	275010000	355380000	302740000	1174800000	1128200000	1169300000	1248700000	5.7	3.7	1.2
+	3.16228	-0.524858	Q93Y12	Q93Y12	3313	MDB19.14	Alpha glucosidase-like protein	carbohydrate metabolic process [GO:0005975]	chloroplast [GO:0009507]	carbohydrate binding [GO:0030246];hydrolase activity, hydrolyzing O-glycosyl compounds [GO:0004553]	+	39	39	39	40.8	40.8	40.8	110.88	0	197.09	14325000000	345	618990000	610060000	418410000	423140000	578550000	528360000	576980000	519490000	432350000	380410000	395980000	297440000	610030000	652630000	757640000	780270000	541310000	353820000	523860000	521180000	1076800000	856810000	943180000	926830000	27.1	30.5	25.5
+	1.7276	-0.525159	O80517	O80517	1447	At2g44790	Uclacyanin-2		anchored component of membrane [GO:0031225];anchored component of plasma membrane [GO:0046658];plasmodesma [GO:0009506]	electron transfer activity [GO:0009055];metal ion binding [GO:0046872]	+	9	9	9	31.7	31.7	31.7	20.354	0	258.88	33228000000	151	2337800000	3916700000	3074400000	2812900000	3539200000	3103700000	3434200000	3270400000	1604400000	1297900000	1390500000	1289500000	111970000	84026000	98283000	75716000	309690000	175290000	267620000	369640000	189450000	176810000	157100000	140730000	31.7	31.7	31.7
+	2.54127	-0.528355	P93033	P93033	1984	FUM1	Fumarate hydratase 1, mitochondrial	fumarate metabolic process [GO:0006106];malate metabolic process [GO:0006108];pollen tube development [GO:0048868];protein tetramerization [GO:0051262];response to oxidative stress [GO:0006979];tricarboxylic acid cycle [GO:0006099]	cytosol [GO:0005829];mitochondrion [GO:0005739];tricarboxylic acid cycle enzyme complex [GO:0045239]	fumarate hydratase activity [GO:0004333]	+	46	46	26	79.5	79.5	57.9	52.999	0	323.31	156690000000	876	9872700000	10647000000	8352500000	7856300000	13180000000	13623000000	12911000000	13763000000	3108200000	2612300000	3649200000	2871100000	3623800000	4482200000	4928900000	4617900000	2754700000	1904600000	2667200000	2776000000	7295900000	6806900000	6308800000	6074400000	75.4	78.3	78.3
+	2.00777	-0.52895	Q9FND9	Q9FND9	4210	RFS5	Probable galactinol--sucrose galactosyltransferase 5	carbohydrate metabolic process [GO:0005975];response to abscisic acid [GO:0009737];response to oxidative stress [GO:0006979];response to water deprivation [GO:0009414]	chloroplast [GO:0009507]	galactinol-sucrose galactosyltransferase activity [GO:0047274]	+	40	40	40	48.8	48.8	48.8	86.236	0	323.31	29219000000	399	2258400000	2325200000	1762100000	2053100000	3282800000	2927700000	2886400000	2714000000	392900000	459320000	382550000	358770000	547530000	569020000	381310000	605660000	645500000	465810000	662370000	578510000	912860000	638030000	823350000	585290000	46.2	44.2	43.8
+	1.77786	-0.539527	Q8H1H9	Q8H1H9	2743	At1g62810	Primary amine oxidase	abscisic acid-activated signaling pathway [GO:0009738];amine metabolic process [GO:0009308];nitric oxide biosynthetic process [GO:0006809]		aliphatic-amine oxidase activity [GO:0052595];aminoacetone:oxygen oxidoreductase(deaminating) activity [GO:0052594];copper ion binding [GO:0005507];phenethylamine:oxygen oxidoreductase (deaminating) activity [GO:0052596];primary amine oxidase activity [GO:0008131];quinone binding [GO:0048038];tryptamine:oxygen oxidoreductase (deaminating) activity [GO:0052593]	+	23	23	21	44.5	44.5	41.3	80.137	0	95.383	9810000000	194	544610000	527540000	699230000	486430000	817730000	653770000	481580000	488890000	159310000	212820000	261130000	199990000	250000000	264450000	307840000	343000000	437850000	328650000	477100000	459610000	320980000	365110000	264110000	458260000	33	31.2	37.9
+	1.99785	-0.550876	O23255	O23255	1215	SAHH1	Adenosylhomocysteinase 1	DNA methylation-dependent heterochromatin assembly [GO:0006346];embryo development ending in seed dormancy [GO:0009793];one-carbon metabolic process [GO:0006730];posttranscriptional gene silencing [GO:0016441];S-adenosylmethionine cycle [GO:0033353]	cytosol [GO:0005829];plasma membrane [GO:0005886];plasmodesma [GO:0009506];vacuolar membrane [GO:0005774];vacuole [GO:0005773]	adenosylhomocysteinase activity [GO:0004013];copper ion binding [GO:0005507]	+	71	71	32	82.7	82.7	45.2	53.378	0	323.31	727950000000	2264	51742000000	56402000000	46743000000	44837000000	41506000000	40099000000	39515000000	40136000000	23453000000	20828000000	22982000000	22515000000	19671000000	21532000000	21574000000	23579000000	19055000000	14757000000	20009000000	18846000000	31559000000	27744000000	29773000000	29094000000	82.7	77.3	77.3
+	2.75744	-0.554501	Q9SZU7	Q9SZU7	5782	KAI2	Probable esterase KAI2	de-etiolation [GO:0009704];photomorphogenesis [GO:0009640];response to karrikin [GO:0080167]	cytosol [GO:0005829];nucleus [GO:0005634]	hydrolase activity [GO:0016787]	+	7	7	7	41.1	41.1	41.1	29.791	0	58.654	2881800000	47	307270000	216820000	252650000	255990000	316520000	338370000	373120000	429340000	13553000	14481000	34071000	30915000	12259000	22057000	13512000	11116000	0	0	0	0	68604000	43421000	56748000	70949000	41.1	24.8	34.8
+	2.89833	-0.558768	P34790	P34790	1732	CYP18-3	Peptidyl-prolyl cis-trans isomerase CYP18-3	blue light signaling pathway [GO:0009785];brassinosteroid mediated signaling pathway [GO:0009742];de-etiolation [GO:0009704];plant-type hypersensitive response [GO:0009626];protein folding [GO:0006457];protein peptidyl-prolyl isomerization [GO:0000413];red, far-red light phototransduction [GO:0009585];regulation of protein phosphorylation [GO:0001932];response to cadmium ion [GO:0046686];response…	apoplast [GO:0048046];cytoplasm [GO:0005737];cytosol [GO:0005829];plasma membrane [GO:0005886]	cyclosporin A binding [GO:0016018];peptidyl-prolyl cis-trans isomerase activity [GO:0003755]	+	30	30	18	99.4	99.4	76.2	18.373	0	323.31	339840000000	1116	19991000000	20032000000	16328000000	17400000000	28999000000	26701000000	27494000000	25362000000	10942000000	10409000000	12383000000	11763000000	6896500000	8854000000	8699800000	9734800000	8403800000	5617800000	8010300000	8739100000	11339000000	11842000000	12855000000	11047000000	99.4	99.4	99.4
+	2.65632	-0.576257	Q9FFU6	Q9FFU6	3917	At5g54830	Cytochrome b561, DM13 and DOMON domain-containing protein At5g54830	oxidation-reduction process [GO:0055114]	endosome [GO:0005768];Golgi apparatus [GO:0005794];integral component of membrane [GO:0016021];trans-Golgi network [GO:0005802]	metal ion binding [GO:0046872]	+	4	4	4	3.7	3.7	3.7	100.53	0	3.5348	1350000000	27	83804000	138390000	89324000	145030000	89042000	75813000	85076000	101360000	74355000	59101000	73247000	51994000	4204700	31188000	26144000	22579000	35504000	8765500	32211000	24491000	44425000	6628200	40080000	7189900	2.1	3.4	3.4
+	3.75551	-0.580878	Q8VXY9	Q8VXY9	3094	UAH	Ureidoglycolate hydrolase	allantoin catabolic process [GO:0000256];purine nucleobase catabolic process [GO:0006145];ureide catabolic process [GO:0010136]	endoplasmic reticulum [GO:0005783];plastid [GO:0009536]	manganese ion binding [GO:0030145];ureidoglycolate hydrolase activity [GO:0004848]	+	31	31	31	59.7	59.7	59.7	51.486	0	127.85	18624000000	296	1200400000	1494300000	836090000	828720000	1164000000	1101100000	882030000	976820000	344480000	344280000	311290000	303570000	623230000	818030000	707020000	773100000	538090000	382760000	621330000	757700000	909020000	880590000	984160000	841540000	46.6	52.7	50.2
+	1.77975	-0.581401	P49572	P49572	1856	IGPS	Indole-3-glycerol phosphate synthase, chloroplastic	tryptophan biosynthetic process [GO:0000162]	chloroplast [GO:0009507];chloroplast stroma [GO:0009570];cytosol [GO:0005829]	copper ion binding [GO:0005507];indole-3-glycerol-phosphate synthase activity [GO:0004425];phosphoribosylanthranilate isomerase activity [GO:0004640]	+	34	34	34	66.9	66.9	66.9	44.577	0	323.31	26930000000	469	807730000	812130000	695980000	730260000	979950000	1024300000	1120000000	1030400000	1096800000	974870000	1841900000	937040000	1432400000	1607600000	856020000	883580000	1358300000	1785500000	1413300000	1392100000	1149000000	1023000000	1009700000	968620000	44.8	46.3	49
+	3.06509	-0.582904	A0A1P8AV08	A0A1P8AV08	141	APA1	Aspartic proteinase A1	lipid metabolic process [GO:0006629]		aspartic-type endopeptidase activity [GO:0004190]	+	31	31	31	64.4	64.4	64.4	56.036	0	323.31	92566000000	428	10718000000	10552000000	7759300000	8917600000	12164000000	13167000000	10083000000	12411000000	202880000	349540000	216770000	193560000	254380000	368350000	368140000	447860000	561770000	524270000	513090000	719430000	472340000	442060000	586140000	573270000	60.7	59.6	57.1
+	3.32982	-0.585106	P17745	P17745	1649	TUFA	Elongation factor Tu, chloroplastic	chloroplast organization [GO:0009658];leaf development [GO:0048366];translational elongation [GO:0006414]	apoplast [GO:0048046];chloroplast [GO:0009507];chloroplast envelope [GO:0009941];chloroplast nucleoid [GO:0042644];chloroplast stroma [GO:0009570];chloroplast thylakoid [GO:0009534];chloroplast thylakoid membrane [GO:0009535];nucleolus [GO:0005730];nucleus [GO:0005634];plastid [GO:0009536]	GTP binding [GO:0005525];GTPase activity [GO:0003924];translation elongation factor activity [GO:0003746]	+	44	43	43	67	63.9	63.9	51.63	0	323.31	137140000000	725	2416000000	2276700000	2100800000	1935000000	3632400000	3578500000	3587900000	2948800000	10282000000	8032400000	12200000000	10771000000	4725500000	5016100000	5733600000	5985500000	4667300000	3693800000	4783700000	4913200000	8648100000	8108900000	8599100000	8501500000	59.7	54.4	58.2
+	1.85443	-0.58703	A0A1P8AXW4	A0A1P8AXW4	172	NAPRT2	Nicotinate phosphoribosyltransferase	NAD biosynthetic process [GO:0009435]		nicotinate phosphoribosyltransferase activity [GO:0004516];nicotinate-nucleotide diphosphorylase (carboxylating) activity [GO:0004514]	+	29	29	15	53.7	53.7	34.9	60.982	0	133.78	15659000000	285	704440000	720070000	649790000	572610000	690660000	810900000	665300000	828750000	510930000	416480000	541860000	431060000	452330000	570430000	473610000	637790000	790910000	480820000	793220000	842470000	780120000	689030000	799480000	805850000	42.3	39.5	37.1
+	2.1343	-0.587653	Q8RWE1	Q8RWE1	2983	At4g33540	Metallo-beta-lactamase family protein	response to arsenic-containing substance [GO:0046685]		protein domain specific binding [GO:0019904]	+	8	8	8	24.5	24.5	24.5	39.637	0	17.598	1126900000	46	99396000	58287000	55817000	73521000	84148000	74899000	58663000	42459000	7516200	7613400	6292300	7382700	15833000	32004000	28610000	26347000	69110000	27120000	70268000	76033000	60229000	40516000	33106000	71684000	16.3	13.5	13.8
+	2.60549	-0.588177	Q9S7Z3	Q9S7Z3	5166	PCS1	Glutathione gamma-glutamylcysteinyltransferase 1	arsenite transport [GO:0015700];cellular detoxification of cadmium ion [GO:0098849];defense response by callose deposition in cell wall [GO:0052544];defense response to bacterium [GO:0042742];detoxification of copper ion [GO:0010273];indole glucosinolate catabolic process [GO:0042344];phytochelatin biosynthetic process [GO:0046938];response to arsenic-containing substance [GO:0046685];response to…	cytosol [GO:0005829];plastid [GO:0009536]	ATPase-coupled arsenite transmembrane transporter activity [GO:0015446];cadmium ion binding [GO:0046870];copper ion binding [GO:0005507];glutathione gamma-glutamylcysteinyltransferase activity [GO:0016756]	+	48	48	48	74.4	74.4	74.4	54.474	0	323.31	39676000000	550	2374800000	2665100000	1808500000	1985200000	3035700000	3103600000	2651900000	2906300000	1258200000	1325600000	1165900000	940890000	1087300000	959430000	1258500000	1244800000	789520000	597140000	797980000	769030000	1755100000	1806400000	1588500000	1800400000	67.2	73.4	57.5
+	1.73458	-0.591997	O82462	O82462	1585	At5g26710	Glutamate--tRNA ligase, cytoplasmic	glutaminyl-tRNA aminoacylation [GO:0006425];glutamyl-tRNA aminoacylation [GO:0006424]	cytosol [GO:0005829];plastid [GO:0009536]	ATP binding [GO:0005524];glutamate-tRNA ligase activity [GO:0004818];glutamine-tRNA ligase activity [GO:0004819]	+	62	62	62	59	59	59	81.064	0	323.31	31309000000	394	3625800000	3667900000	2354200000	2631800000	3679500000	3922600000	3539600000	3285200000	246350000	282920000	357520000	213470000	326380000	368050000	335370000	306300000	197780000	164420000	165350000	151410000	381290000	356590000	476550000	272530000	55.4	56.7	52.2
+	2.04794	-0.592113	Q93WN0	Q93WN0	3302	SBP2	Selenium-binding protein 2	polar nucleus fusion [GO:0010197]	cytosol [GO:0005829]	selenium binding [GO:0008430]	+	53	53	43	92.4	92.4	83.8	53.937	0	323.31	112850000000	874	1964800000	1998100000	1528200000	1465500000	2231300000	2501700000	2156100000	2258500000	5034100000	4634800000	5486300000	4779100000	4636800000	5917800000	5750100000	6238300000	5151100000	3136100000	5431300000	5681500000	9027900000	8367300000	8600400000	8877100000	67.6	65.7	63.9
+	2.45093	-0.594167	Q9LU64	Q9LU64	4738	FSD2	Superoxide dismutase [Fe] 2, chloroplastic	oxidation-reduction process [GO:0055114];response to UV [GO:0009411]	chloroplast [GO:0009507];chloroplast nucleoid [GO:0042644];chloroplast thylakoid [GO:0009534];thylakoid [GO:0009579]	metal ion binding [GO:0046872];superoxide dismutase activity [GO:0004784]	+	9	9	9	28.2	28.2	28.2	34.663	0	19.864	1034100000	44	0	0	0	6547200	0	0	0	0	127440000	135330000	160090000	149110000	27572000	26505000	32887000	40301000	20056000	19148000	21818000	50561000	50563000	51223000	60571000	54370000	0	0	0
+	2.11597	-0.603753	Q8RWV9	Q8RWV9	3011	HDC1	Zinc finger CCCH domain protein	developmental vegetative growth [GO:0080186];flower development [GO:0009908];histone deacetylation [GO:0016575];response to abscisic acid [GO:0009737];response to salt [GO:1902074];seed germination [GO:0009845]	nucleus [GO:0005634]		+	31	31	31	37.7	37.7	37.7	104.15	0	109.12	7253800000	136	522080000	635130000	574010000	535950000	866850000	761150000	734170000	802980000	73838000	63578000	113310000	88308000	90703000	99763000	105610000	112100000	115860000	91771000	106940000	140520000	152680000	162290000	128900000	175300000	24.8	25.6	24
+	1.53783	-0.60582	O22957	O22957	1189	At2g34040	Apoptosis inhibitory protein 5 (API5)	regulation of programmed cell death [GO:0043067]	cytosol [GO:0005829];endoplasmic reticulum [GO:0005783];nucleus [GO:0005634];plasmodesma [GO:0009506]	mRNA binding [GO:0003729];RNA binding [GO:0003723]	+	38	38	35	59.1	59.1	56.1	61.644	0	314.62	18175000000	363	794650000	921770000	713040000	716180000	1290200000	1265200000	1042200000	1100500000	902020000	820230000	912200000	832870000	385680000	479070000	440930000	538100000	466290000	259460000	469670000	512410000	838460000	731660000	901370000	841210000	47.6	52.6	43
+	3.88602	-0.606662	Q0WW26	Q0WW26	2098	At4g34450	Coatomer subunit gamma	endoplasmic reticulum to Golgi vesicle-mediated transport [GO:0006888];intracellular protein transport [GO:0006886];intra-Golgi vesicle-mediated transport [GO:0006891];protein secretion [GO:0009306]	chloroplast [GO:0009507];COPI vesicle coat [GO:0030126];cytosol [GO:0005829];endoplasmic reticulum [GO:0005783];endoplasmic reticulum-Golgi intermediate compartment [GO:0005793];Golgi apparatus [GO:0005794];Golgi membrane [GO:0000139];membrane [GO:0016020];plasma membrane [GO:0005886];plasmodesma [GO:0009506]	structural molecule activity [GO:0005198]	+	99	99	99	91.3	91.3	91.3	98.49	0	323.31	144270000000	935	15943000000	17195000000	13945000000	13932000000	19594000000	18522000000	17320000000	19732000000	887330000	769500000	858240000	800630000	415760000	335170000	343200000	316030000	263780000	322780000	237060000	442300000	544850000	520180000	525580000	500850000	86.2	84.9	81.5
+	2.91047	-0.616065	P34795	P34795	1734	PGIC	Glucose-6-phosphate isomerase, cytosolic	defense response to fungus, incompatible interaction [GO:0009817];gluconeogenesis [GO:0006094];glucose 6-phosphate metabolic process [GO:0051156];glycolytic process [GO:0006096];response to cadmium ion [GO:0046686]	cytosol [GO:0005829];plastid [GO:0009536]	glucose-6-phosphate isomerase activity [GO:0004347];monosaccharide binding [GO:0048029]	+	44	44	44	70.9	70.9	70.9	61.717	0	323.31	66351000000	691	3177800000	3514300000	3007400000	2801500000	3649400000	3411200000	3578800000	3458300000	2390800000	2360900000	2804500000	2563300000	1880800000	2246300000	2360600000	2845900000	1654300000	936010000	1626600000	2005000000	3713900000	3216700000	3764100000	3382700000	63.6	63.8	67.3
+	2.73477	-0.617012	Q9SH69	Q9SH69	5325	PGD1	6-phosphogluconate dehydrogenase, decarboxylating 1, chloroplastic	D-gluconate catabolic process [GO:0046177];pentose-phosphate shunt, oxidative branch [GO:0009051]	chloroplast [GO:0009507];chloroplast stroma [GO:0009570];cytosol [GO:0005829];plastid [GO:0009536];secretory vesicle [GO:0099503]	NADP binding [GO:0050661];phosphogluconate 2-dehydrogenase activity [GO:0008114];phosphogluconate dehydrogenase (decarboxylating) activity [GO:0004616]	+	53	27	27	84.2	42.9	42.9	53.377	0	323.31	35575000000	311	2839600000	3328300000	2712100000	2780900000	3920500000	4487600000	4265900000	4485900000	348030000	300570000	253630000	349730000	418530000	284180000	353400000	409880000	113350000	136690000	118610000	206520000	809310000	789050000	780880000	1082200000	83	83.4	80.7
+	1.55578	-0.62073	Q93ZB6	Q93ZB6	3348	HEME1	Uroporphyrinogen decarboxylase 1, chloroplastic	chlorophyll biosynthetic process [GO:0015995];protoporphyrinogen IX biosynthetic process [GO:0006782];response to cadmium ion [GO:0046686]	chloroplast [GO:0009507];chloroplast stroma [GO:0009570]	uroporphyrinogen decarboxylase activity [GO:0004853]	+	39	39	39	64.1	64.1	64.1	46.254	0	323.31	86224000000	630	140040000	120880000	69784000	113150000	111540000	137660000	172420000	171690000	6988100000	7184200000	7924800000	7191200000	3747500000	4269400000	4087900000	3885200000	4975500000	3263500000	4682200000	4485500000	7025800000	5272100000	4921300000	5282600000	30.9	26.1	24.2
+	3.1546	-0.629862	F4K0E8	F4K0E8	973	ISPG	4-hydroxy-3-methylbut-2-en-1-yl diphosphate synthase (ferredoxin), chloroplastic	isopentenyl diphosphate biosynthetic process, methylerythritol 4-phosphate pathway [GO:0019288];response to bacterium [GO:0009617];systemic acquired resistance, salicylic acid mediated signaling pathway [GO:0009862];terpenoid biosynthetic process [GO:0016114]	chloroplast [GO:0009507];chloroplast envelope [GO:0009941];chloroplast stroma [GO:0009570];plastid [GO:0009536]	4 iron, 4 sulfur cluster binding [GO:0051539];4-hydroxy-3-methylbut-2-en-1-yl diphosphate synthase activity [GO:0046429];iron ion binding [GO:0005506]	+	48	48	48	64.4	64.4	64.4	82.256	0	323.31	26778000000	525	687760000	539420000	441770000	480730000	656680000	886930000	612750000	668080000	776020000	804380000	2466500000	1159400000	1243100000	1388100000	1165000000	1267200000	1057500000	892180000	1219600000	1297200000	1704500000	1742800000	1750600000	1870200000	43.5	36.6	35.1
+	2.04854	-0.636247	Q4PSZ5	Q4PSZ5	2327	At1g51410	NAD(P)-binding Rossmann-fold superfamily protein			alcohol dehydrogenase (NAD+) activity [GO:0004022];oxidoreductase activity [GO:0016491];oxidoreductase activity, acting on the CH-OH group of donors, NAD or NADP as acceptor [GO:0016616]	+	2	1	1	5.5	3.7	3.7	35.919	0	14.962	4050600000	24	380780000	403910000	295950000	358490000	309960000	323810000	359520000	351170000	62729000	58858000	65276000	57842000	55814000	54024000	58215000	63095000	113580000	86113000	122730000	120090000	89758000	85137000	91971000	81762000	5.5	5.5	5.5
+	1.89064	-0.636639	O82265	O82265	1569	SCC3	Sister-chromatid cohesion protein 3	cell division [GO:0051301];meiotic sister chromatid cohesion, centromeric [GO:0051754];monopolar spindle attachment to meiosis I kinetochore [GO:0051455];sister chromatid cohesion [GO:0007062]	chromatin [GO:0000785];chromosome [GO:0005694];cohesin complex [GO:0008278];nucleus [GO:0005634]	chromatin binding [GO:0003682]	+	6	6	6	5.6	5.6	5.6	125.76	0	8.7245	4693100000	37	368330000	337170000	308290000	312240000	540160000	624080000	355120000	496050000	52884000	72049000	145170000	148530000	30426000	35395000	34796000	56696000	0	0	158920000	147610000	71841000	82454000	104310000	210560000	3.8	3.8	3.8
+	1.64725	-0.641105	P46637	P46637	1817	ARGAH1	Arginase 1, mitochondrial	arginine catabolic process [GO:0006527];defense response to bacterium [GO:0042742];putrescine biosynthetic process from arginine, using agmatinase [GO:0033389];urea cycle [GO:0000050]	cytosol [GO:0005829];mitochondrion [GO:0005739]	agmatinase activity [GO:0008783];arginase activity [GO:0004053];cobalt ion binding [GO:0050897]	+	12	4	4	36	22.8	22.8	37.344	0	89.525	5280700000	64	110250000	109750000	25609000	101800000	112840000	138520000	118990000	122580000	257550000	227150000	276190000	227880000	171680000	162090000	170960000	154840000	415510000	226950000	395670000	414750000	340740000	275320000	325160000	397920000	26	21.9	17.8
+	1.56751	-0.642152	Q94CC6;Q1PF50	Q94CC6	3527	At4g36195	Prolyl carboxypeptidase like protein	proteolysis [GO:0006508]	secretory vesicle [GO:0099503];vacuolar membrane [GO:0005774];vacuole [GO:0005773]	carboxypeptidase activity [GO:0004180];dipeptidyl-peptidase activity [GO:0008239];serine-type peptidase activity [GO:0008236]	+	38	38	21	54.9	54.9	40.4	54.773	0	323.31	69702000000	814	2684700000	2760200000	2232300000	2239800000	2734900000	3094800000	2093700000	2471300000	2581500000	2026300000	3148000000	3296300000	1980900000	2251500000	2820800000	2569200000	3675500000	2087500000	4537100000	4466900000	3453800000	3604400000	3812400000	3078100000	46.3	52	48.4
+	1.71119	-0.645762	Q9SGW5	Q9SGW5	5322	At1g64500	F1N19.7	actin filament bundle assembly [GO:0051017];chloroplast relocation [GO:0009902]	actin filament [GO:0005884];nucleus [GO:0005634]	electron transfer activity [GO:0009055];protein disulfide oxidoreductase activity [GO:0015035]	+	6	6	6	20.9	20.9	20.9	41.016	0	38.908	1909100000	59	15888000	0	0	0	0	0	0	0	44205000	70264000	96756000	93879000	47160000	88957000	132510000	121120000	182070000	67592000	169030000	181560000	143620000	159660000	152790000	142010000	3.5	0	0
+	2.01178	-0.646369	Q9ZWB4	Q9ZWB4	6036	3AT1	Coumaroyl-CoA:anthocyanidin 3-O-glucoside-6''-O-coumaroyltransferase 1			transferase activity, transferring acyl groups other than amino-acyl groups [GO:0016747]	+	3	3	3	7	7	7	51.925	1	-2	454830000	4	0	0	0	6152100	10096000	0	0	10182000	25339000	27784000	34690000	30981000	13026000	15059000	31368000	17473000	19633000	17778000	26518000	41681000	22902000	29005000	44070000	31090000	0	0	0
+	1.6697	-0.646466	O48646	O48646	1280	GPX6	Probable phospholipid hydroperoxide glutathione peroxidase 6, mitochondrial	response to cadmium ion [GO:0046686];response to oxidative stress [GO:0006979]	chloroplast [GO:0009507];cytosol [GO:0005829];mitochondrion [GO:0005739];plasma membrane [GO:0005886]	glutathione peroxidase activity [GO:0004602];peroxidase activity [GO:0004601];phospholipid-hydroperoxide glutathione peroxidase activity [GO:0047066]	+	31	31	31	69.4	69.4	69.4	25.584	0	257.24	67014000000	404	6396700000	5924500000	4621900000	4494500000	7350000000	7391600000	7526300000	7640000000	576680000	558450000	561060000	551140000	561890000	727200000	935550000	735380000	894100000	913890000	1049100000	1326000000	1678600000	1458000000	1586000000	1556100000	69.4	69.4	57.8
+	5.12714	-0.646514	Q94BT0	Q94BT0	3508	SPS1	Sucrose-phosphate synthase 1	nectar secretion [GO:0071836];sucrose biosynthetic process [GO:0005986]	cytosol [GO:0005829];plasma membrane [GO:0005886];plasmodesma [GO:0009506]	sucrose-phosphate synthase activity [GO:0046524]	+	52	52	43	53.3	53.3	47	117.32	0	323.31	33897000000	356	4339500000	4597300000	3580100000	4086600000	3371800000	3162600000	3200400000	3093100000	188930000	180220000	185230000	377390000	224230000	156960000	531800000	220350000	59320000	64797000	42930000	27769000	453350000	799320000	478890000	474170000	45.9	48.1	42.8
+	3.91339	-0.65087	Q9FGT8	Q9FGT8	3958	TIL	Temperature-induced lipocalin-1	cellular chloride ion homeostasis [GO:0030644];cellular response to hypoxia [GO:0071456];cellular sodium ion homeostasis [GO:0006883];heat acclimation [GO:0010286];hyperosmotic salinity response [GO:0042538];lipid metabolic process [GO:0006629];positive regulation of response to oxidative stress [GO:1902884];positive regulation of response to salt stress [GO:1901002];response to cold [GO:0009409]…	chloroplast envelope [GO:0009941];chloroplast membrane [GO:0031969];cytoplasm [GO:0005737];cytoplasmic side of plasma membrane [GO:0009898];cytosol [GO:0005829];endoplasmic reticulum [GO:0005783];Golgi apparatus [GO:0005794];mitochondrion [GO:0005739];plasma membrane [GO:0005886];plasmodesma [GO:0009506];plastid [GO:0009536];vacuolar membrane [GO:0005774];vacuole [GO:0005773]	nutrient reservoir activity [GO:0045735]	+	21	21	21	72.6	72.6	72.6	21.434	0	152.71	13366000000	204	581110000	624040000	291060000	354490000	403120000	440590000	429440000	456930000	1180800000	1140600000	1685700000	1333400000	196760000	273360000	318300000	338580000	398500000	186020000	432630000	362300000	578440000	495970000	403580000	459800000	69.4	69.4	62.9
+	1.51075	-0.653337	A0A1P8BE91	A0A1P8BE91	307	SDN3	Small RNA degrading nuclease 3			nucleic acid binding [GO:0003676]	+	4	4	4	8	8	8	71.324	0	4.3746	522040000	5	5347400	0	0	3233800	46226000	17033000	33553000	31799000	17360000	21126000	16382000	14500000	18406000	20408000	21130000	18135000	31726000	24697000	32747000	29053000	34596000	29479000	28002000	27095000	1.9	0	2.5
+	2.37575	-0.653759	Q9FK07	Q9FK07	4069	CLPX1	CLP protease regulatory subunit CLPX1, mitochondrial	protein catabolic process [GO:0030163];protein folding [GO:0006457];proteolysis [GO:0006508]	mitochondrial matrix [GO:0005759];mitochondrion [GO:0005739]	ATP binding [GO:0005524];ATPase activity [GO:0016887];peptidase activity [GO:0008233];unfolded protein binding [GO:0051082]	+	15	15	11	25.2	25.2	18.1	61.963	0	37.651	6042400000	122	322050000	273910000	127850000	189890000	210190000	275160000	388270000	320030000	212610000	180460000	117050000	53296000	225210000	262570000	201580000	282870000	189750000	231120000	148870000	206370000	545000000	305090000	303560000	469660000	17.3	19.5	13.5
+	2.29159	-0.655177	Q9SCV3	Q9SCV3	5237	BGAL9	Beta-galactosidase 9	carbohydrate metabolic process [GO:0005975]	apoplast [GO:0048046];cell wall [GO:0005618];vacuolar membrane [GO:0005774];vacuole [GO:0005773]	beta-galactosidase activity [GO:0004565];carbohydrate binding [GO:0030246]	+	55	55	54	63.5	63.5	63.1	99.197	0	323.31	42392000000	705	773120000	354240000	234350000	247320000	260600000	294970000	372100000	284190000	1995300000	2187700000	1973400000	2052500000	2096800000	1883400000	2363500000	2592400000	2278700000	1808800000	2138400000	2296300000	3629700000	3391100000	3458500000	3424900000	35.5	23.7	23.1
+	2.17195	-0.656345	Q9SYP2	Q9SYP2	5750	PFP-ALPHA1	Pyrophosphate--fructose 6-phosphate 1-phosphotransferase subunit alpha 1	photosynthesis [GO:0015979];response to fructose [GO:0009750];response to glucose [GO:0009749];response to sucrose [GO:0009744]	cytosol [GO:0005829];nucleus [GO:0005634]	6-phosphofructokinase activity [GO:0003872];ATP binding [GO:0005524];diphosphate-fructose-6-phosphate 1-phosphotransferase activity [GO:0047334];metal ion binding [GO:0046872];phosphofructokinase activity [GO:0008443]	+	60	60	37	88.1	88.1	65.1	67.118	0	323.31	120610000000	717	11278000000	11423000000	9082200000	9232700000	15090000000	16274000000	15801000000	17030000000	793710000	801280000	677370000	876570000	894910000	956860000	1035900000	1063800000	571940000	465030000	583230000	752090000	1614400000	1306700000	1617900000	1385800000	80.9	83.7	78.7
+	1.8272	-0.656376	O80574	O80574	1457	DAPB1	4-hydroxy-tetrahydrodipicolinate reductase 1, chloroplastic	diaminopimelate biosynthetic process [GO:0019877];lysine biosynthetic process via diaminopimelate [GO:0009089]	chloroplast [GO:0009507];chloroplast stroma [GO:0009570];cytosol [GO:0005829]	4-hydroxy-tetrahydrodipicolinate reductase [GO:0008839];NADPH binding [GO:0070402]	+	19	19	13	64	64	49	37.55	0	258.41	25912000000	222	389810000	359680000	326530000	312840000	553540000	538010000	452780000	397830000	1908900000	1693600000	2093300000	1851400000	885940000	1170000000	994270000	1149400000	1182800000	846590000	1390900000	1395300000	1617700000	1513300000	1693100000	1194600000	20.2	19.9	30.8
+	2.85775	-0.659466	Q9LIR4	Q9LIR4	4495	DHAD	Dihydroxy-acid dehydratase, chloroplastic	branched-chain amino acid biosynthetic process [GO:0009082];embryo sac development [GO:0009553];isoleucine biosynthetic process [GO:0009097];pollen development [GO:0009555];response to salt stress [GO:0009651];root development [GO:0048364];valine biosynthetic process [GO:0009099]	chloroplast [GO:0009507];chloroplast stroma [GO:0009570];plastid [GO:0009536]	4 iron, 4 sulfur cluster binding [GO:0051539];copper ion binding [GO:0005507];dihydroxy-acid dehydratase activity [GO:0004160];hydro-lyase activity [GO:0016836]	+	57	57	57	71.2	71.2	71.2	64.913	0	323.31	229660000000	1250	6495400000	6899800000	4725100000	4708500000	6205300000	7205500000	6160100000	6171800000	13218000000	12952000000	14943000000	14322000000	6990600000	8041600000	9802700000	10050000000	10717000000	7069000000	10731000000	11098000000	12976000000	12481000000	13211000000	12487000000	63.5	71.1	61.7
+	4.1085	-0.66295	Q56WH4	Q56WH4	2341	HDT2	Histone deacetylase HDT2	DNA mediated transformation [GO:0009294];negative regulation of transcription, DNA-templated [GO:0045892];polarity specification of adaxial/abaxial axis [GO:0009944];root development [GO:0048364];seed dormancy process [GO:0010162]	cell wall [GO:0005618];cytosol [GO:0005829];mitochondrion [GO:0005739];nucleolus [GO:0005730];nucleus [GO:0005634];plastid [GO:0009536];vacuolar membrane [GO:0005774]	histone deacetylase activity [GO:0004407]	+	14	14	13	44.1	44.1	41.2	32.348	0	135.16	18956000000	93	1900200000	1996200000	1237800000	1508000000	3133700000	3048600000	2703000000	2697700000	0	0	0	0	13469000	27048000	9766000	41886000	40286000	3933500	25853000	54317000	113790000	114330000	138720000	147040000	36.9	32	30.7
+	3.16544	-0.663804	O80816	O80816	1479	GLAUCE	HXXXD-type acyl-transferase family protein	double fertilization forming a zygote and endosperm [GO:0009567]	cytoplasm [GO:0005737];nucleus [GO:0005634]	transferase activity, transferring acyl groups other than amino-acyl groups [GO:0016747]	+	12	12	12	26.7	26.7	26.7	50.505	0	12.226	1219200000	47	23595000	0	11365000	13788000	0	28480000	14771000	18103000	44856000	33309000	57252000	24319000	58660000	69136000	80308000	90831000	13973000	3105500	8440200	13705000	173890000	138770000	151160000	147430000	2	0	2
+	1.79871	-0.66439	Q93YR3	Q93YR3	3322	At4g22670	FAM10 family protein At4g22670	chaperone cofactor-dependent protein refolding [GO:0051085];chaperone-mediated protein folding [GO:0061077];protein-containing complex assembly [GO:0065003];response to cadmium ion [GO:0046686]	cytosol [GO:0005829]	heat shock protein binding [GO:0031072];protein dimerization activity [GO:0046983]	+	30	30	30	50.6	50.6	50.6	46.621	0	323.31	26538000000	405	642600000	748240000	580490000	517230000	1200400000	1348300000	1114100000	1240800000	1709500000	1651000000	1954600000	1768000000	875470000	865560000	814050000	738500000	1094800000	544810000	1091200000	942110000	1316100000	1271500000	1207200000	1301600000	46	40.6	39
+	2.24842	-0.665605	O82768	O82768	1601	HISN2	Histidine biosynthesis bifunctional protein hisIE, chloroplastic	histidine biosynthetic process [GO:0000105]	chloroplast [GO:0009507];chloroplast stroma [GO:0009570];cytosol [GO:0005829]	ATP binding [GO:0005524];phosphoribosyl-AMP cyclohydrolase activity [GO:0004635];phosphoribosyl-ATP diphosphatase activity [GO:0004636]	+	25	25	25	58.7	58.7	58.7	31.667	0	103.6	20933000000	207	199110000	227100000	204080000	171460000	270470000	262470000	249130000	160670000	1417700000	1568300000	1404700000	1407200000	812230000	828470000	1014300000	1132100000	1038000000	680040000	1073400000	1054000000	1670200000	1035400000	1406700000	1646300000	33.5	33.5	37.7
+	1.91673	-0.668504	Q8VYV0	Q8VYV0	3148	At1g43690	At1g43690/F2J6_4		cytosol [GO:0005829]	cysteine-type carboxypeptidase activity [GO:0016807];Lys48-specific deubiquitinase activity [GO:1990380]	+	28	28	28	49.2	49.2	49.2	65.463	0	285.13	19716000000	289	1112000000	1182800000	971280000	789310000	1180000000	1359000000	1059900000	1117500000	516180000	574510000	717970000	491900000	585670000	703960000	771290000	501650000	663310000	557390000	775530000	683610000	790470000	803400000	884190000	923590000	43.1	39.6	41.1
+	2.55388	-0.670209	Q94C59	Q94C59	3520	PATL4	Patellin-4	cell cycle [GO:0007049];cell division [GO:0051301];cellular response to auxin stimulus [GO:0071365];protein localization involved in auxin polar transport [GO:1901703]	cytosol [GO:0005829];nucleus [GO:0005634];plasma membrane [GO:0005886]	lipid binding [GO:0008289]	+	84	84	84	85.4	85.4	85.4	61.189	0	323.31	118340000000	1232	9447100000	9839800000	7613700000	7932900000	7682100000	8576600000	7498800000	8476200000	4545500000	4756700000	5616700000	4910400000	1843200000	2223200000	2269900000	2306300000	3045700000	1786900000	2539000000	2689500000	3387900000	2959500000	3231900000	3161000000	83.1	81.9	82.6
+	4.72796	-0.671979	Q9SCY0	Q9SCY0	5244	PGMP	Phosphoglucomutase, chloroplastic	carbohydrate metabolic process [GO:0005975];detection of gravity [GO:0009590];glucose metabolic process [GO:0006006];response to cold [GO:0009409];starch biosynthetic process [GO:0019252]	apoplast [GO:0048046];chloroplast [GO:0009507];chloroplast envelope [GO:0009941];chloroplast stroma [GO:0009570];cytosol [GO:0005829];stromule [GO:0010319]	magnesium ion binding [GO:0000287];phosphoglucomutase activity [GO:0004614]	+	56	56	56	73.2	73.2	73.2	67.988	0	323.31	131630000000	790	585310000	600730000	392830000	414320000	502110000	615390000	716230000	609790000	7860800000	8454600000	10045000000	10479000000	7513000000	8063400000	8516000000	8921100000	5811500000	2288500000	3694200000	3586900000	12301000000	9909900000	9818500000	9932700000	40.3	44	37.1
+	2.2546	-0.676009	Q9SHG8	Q9SHG8	5330	AtHBP1	At1g17100		nucleus [GO:0005634];secretory vesicle [GO:0099503];vacuolar membrane [GO:0005774];vacuole [GO:0005773]	heme binding [GO:0020037]	+	20	20	20	72.4	72.4	72.4	25.388	0	323.31	91964000000	386	102580000	62655000	51718000	60414000	78147000	84318000	57228000	26868000	5839300000	6749100000	7406200000	7147600000	2202000000	3360900000	4138400000	3896100000	7287900000	5342200000	7841200000	7832500000	5742500000	5001600000	5574300000	6078200000	31.9	19.8	17.2
+	1.62981	-0.677124	O64767	O64767	1374	At2g35040	AICARFT/IMPCHase bienzyme family protein	purine nucleotide biosynthetic process [GO:0006164]		IMP cyclohydrolase activity [GO:0003937];phosphoribosylaminoimidazolecarboxamide formyltransferase activity [GO:0004643]	+	56	56	56	85.7	85.7	85.7	59.471	0	323.31	102120000000	1128	2952000000	3531200000	3157300000	2537700000	3218900000	3392500000	3250500000	3493000000	6524900000	6011700000	6900000000	5791300000	2854400000	3763900000	3447300000	3558500000	4929300000	3115600000	4923600000	4985100000	4896000000	4956100000	4406000000	5527300000	80.6	82.9	73
+	4.97752	-0.677402	Q8H0U4	Q8H0U4	2701	TRN1	Transportin-1	import into nucleus [GO:0051170];miRNA loading onto RISC involved in gene silencing by miRNA [GO:0035280];protein import into nucleus [GO:0006606]	cytoplasm [GO:0005737];cytosol [GO:0005829];nucleoplasm [GO:0005654];nucleus [GO:0005634]	nuclear import signal receptor activity [GO:0061608];nuclear localization sequence binding [GO:0008139];Ran GTPase binding [GO:0008536]	+	51	51	51	56.6	56.6	56.6	99.108	0	323.31	50701000000	585	4978700000	5232900000	4049700000	3949300000	5719000000	6070700000	5396800000	5484200000	595140000	455880000	737580000	527250000	387840000	417830000	437890000	484070000	250080000	192040000	227400000	282050000	1256900000	1097400000	1230900000	1240000000	54.7	52.2	54.1
+	1.71715	-0.682865	Q9LFB5	Q9LFB5	4411	At5g01210	AT5g01210/F7J8_190			transferase activity, transferring acyl groups other than amino-acyl groups [GO:0016747]	+	15	15	15	33.9	33.9	33.9	52.331	0	28.508	2966000000	85	250920000	198800000	164460000	179270000	278410000	284780000	211810000	306730000	191170000	169950000	149250000	122480000	25062000	30956000	33570000	21852000	55762000	31693000	30966000	41264000	41027000	46345000	43285000	56204000	20.4	23.8	16.8
+	2.21735	-0.686893	Q93VC9	Q93VC9	3270	CATHB2	Cathepsin B-like protease 2	defense response [GO:0006952];proteolysis involved in cellular protein catabolic process [GO:0051603];regulation of catalytic activity [GO:0050790]	extracellular region [GO:0005576];extracellular space [GO:0005615];lysosome [GO:0005764];vacuole [GO:0005773]	cysteine-type endopeptidase activity [GO:0004197]	+	24	22	22	59.7	56.9	56.9	40.033	0	323.31	47766000000	448	3332800000	3438000000	2596700000	2469800000	3031500000	2666900000	2741100000	2889500000	1054400000	960590000	1137800000	1036000000	897940000	1161400000	1314700000	1325200000	2464200000	1390900000	2381800000	2515100000	1837100000	1544600000	1777900000	1799700000	54.7	59.7	59.1
+	1.70209	-0.6887	Q9C9C9	Q9C9C9	3802	SOT18	Cytosolic sulfotransferase 18	glucosinolate biosynthetic process [GO:0019761]	cytoplasm [GO:0005737]	3-methylthiopropyl-desulfoglucosinolate sulfotransferase activity [GO:0080066];4-methylthiobutyl-desulfoglucosinolate sulfotransferase activity [GO:0080067];5-methylthiopentyl-desulfoglucosinolate sulfotransferase activity [GO:0080068];7-methylthioheptyl-desulfoglucosinolate sulfotransferase activity [GO:0080069];8-methylthiooctyl-desulfoglucosinolate sulfotransferase activity [GO:0080070];desulf…	+	45	45	38	91.7	91.7	87.1	40.464	0	323.31	78252000000	803	2788300000	3133700000	2113100000	2429500000	4316300000	4397900000	5071600000	5397300000	2512500000	2565000000	2967100000	2345300000	2604300000	2957200000	2795800000	3021400000	3478300000	2197500000	3316700000	3226800000	4202100000	3652200000	3395400000	3366700000	88.3	80	73.7
+	3.80897	-0.689109	Q9ZRA2	Q9ZRA2	5910	HGO	Homogentisate 1,2-dioxygenase	cellular amino acid metabolic process [GO:0006520];homogentisate catabolic process [GO:1902000];L-phenylalanine catabolic process [GO:0006559];tyrosine catabolic process [GO:0006572]	cytoplasm [GO:0005737];cytosol [GO:0005829];plastid [GO:0009536]	homogentisate 1,2-dioxygenase activity [GO:0004411];metal ion binding [GO:0046872]	+	26	26	26	71.1	71.1	71.1	51.455	0	219.74	26395000000	354	556670000	547330000	399050000	523520000	452870000	437050000	484380000	399810000	3002100000	2973100000	3374700000	3146300000	451880000	525230000	547750000	482330000	1222200000	864780000	1141900000	1298700000	879680000	892400000	824540000	967240000	56	48.2	40.1
+	1.44013	-0.698036	Q93VP3	Q93VP3	3279	ELF5A-2	Eukaryotic translation initiation factor 5A-2	defense response to bacterium [GO:0042742];host programmed cell death induced by symbiont [GO:0034050];positive regulation of translational elongation [GO:0045901];positive regulation of translational termination [GO:0045905];programmed cell death [GO:0012501];response to bacterium [GO:0009617];response to cadmium ion [GO:0046686];response to wounding [GO:0009611];translational initiation [GO:000…	cytosol [GO:0005829];nucleus [GO:0005634]	ribosome binding [GO:0043022];translation elongation factor activity [GO:0003746];translation initiation factor activity [GO:0003743]	+	20	20	17	94.3	94.3	89.3	17.14	0	323.31	235730000000	712	11428000000	11530000000	9077400000	10255000000	18179000000	18146000000	16319000000	17419000000	10203000000	10893000000	12440000000	11624000000	4702100000	5053100000	5571500000	5054800000	8848900000	5594100000	7980600000	7641000000	7301200000	6495300000	7261400000	6710400000	90.6	94.3	94.3
+	4.37012	-0.698505	Q9FWA3	Q9FWA3	4285	PGD2	6-phosphogluconate dehydrogenase, decarboxylating 2	D-gluconate catabolic process [GO:0046177];male-female gamete recognition during double fertilization forming a zygote and endosperm [GO:0080173];pentose-phosphate shunt, oxidative branch [GO:0009051]	chloroplast stroma [GO:0009570];cytosol [GO:0005829];P4 peroxisome [GO:0019822];peroxisome [GO:0005777];secretory vesicle [GO:0099503]	NADP binding [GO:0050661];phosphogluconate dehydrogenase (decarboxylating) activity [GO:0004616]	+	78	78	74	97.9	97.9	92	53.577	0	323.31	250360000000	1277	23287000000	22533000000	21147000000	20158000000	23927000000	24713000000	23227000000	24101000000	3812300000	3768900000	3965800000	3852700000	3202900000	3950900000	4298000000	4457500000	2800500000	2141900000	2886800000	3237900000	6766300000	6262700000	6200100000	5664500000	97.9	94.4	94.4
+	2.35324	-0.701121	F4I0N7	F4I0N7	586	GASA1	GAST1 protein homolog 1				+	3	3	3	24.7	24.7	24.7	10.645	0	10.351	2109900000	22	7835300	7025200	8454200	0	40117000	41008000	38923000	38159000	198340000	259980000	299590000	256230000	33170000	58020000	40330000	47062000	96781000	89307000	92358000	136890000	67135000	102990000	72713000	77471000	11.3	11.3	10.3
+	1.60555	-0.701461	Q9FUS9	Q9FUS9	4262	GSTU18	Glutathione S-transferase U18	glutathione metabolic process [GO:0006749];toxin catabolic process [GO:0009407]	cytoplasm [GO:0005737];cytosol [GO:0005829]	glutathione transferase activity [GO:0004364]	+	9	6	6	28.2	22.5	22.5	25.911	0	5.9862	1885200000	18	0	0	0	0	0	0	0	0	71827000	57244000	90623000	110320000	114480000	137870000	157300000	122300000	65960000	60423000	67437000	76485000	183020000	209130000	160780000	200060000	2.6	2.6	2.6
+	2.53435	-0.70461	Q147R9	Q147R9	2103	At1g19690	At1g19690		chloroplast [GO:0009507]	catalytic activity [GO:0003824]	+	9	9	9	27	27	27	39.752	0	16.315	1622400000	48	0	2972700	0	0	5032300	12429000	8014600	7431900	55277000	58171000	75804000	62394000	103360000	141710000	121180000	107570000	76390000	58881000	32474000	84334000	173650000	149460000	132510000	153340000	0	2.8	0
+	1.42317	-0.705597	Q5XEP2	Q5XEP2	2381	HOP2	Hsp70-Hsp90 organizing protein 2	chaperone-mediated protein complex assembly [GO:0051131];response to cadmium ion [GO:0046686]	cytosol [GO:0005829];nucleus [GO:0005634];plasma membrane [GO:0005886]	Hsp90 protein binding [GO:0051879];preprotein binding [GO:0070678]	+	62	62	48	82.8	82.8	72.5	64.519	0	323.31	48585000000	695	1369500000	1857600000	1196900000	1616300000	2437800000	3033300000	2559200000	2745800000	2969000000	2980900000	3209000000	2989800000	1506100000	1985500000	1145600000	2229500000	1291500000	827290000	1595500000	1622400000	1621400000	1546900000	2331800000	1915900000	74.3	75.8	68.3
+	2.13364	-0.706225	P92974	P92974	1966	UBA2	Ubiquitin-activating enzyme E1 2	cellular response to DNA damage stimulus [GO:0006974];protein modification by small protein conjugation [GO:0032446];protein ubiquitination [GO:0016567];ubiquitin-dependent protein catabolic process [GO:0006511]	cytoplasm [GO:0005737];cytosol [GO:0005829];nucleus [GO:0005634]	ATP binding [GO:0005524];ubiquitin activating enzyme activity [GO:0004839];ubiquitin-protein transferase activity [GO:0004842]	+	61	51	51	50.9	42.8	42.8	119.62	0	323.31	24784000000	303	2839300000	3030800000	2479300000	2311200000	2522700000	2940600000	2615000000	2709000000	287770000	227210000	324940000	250000000	153600000	137590000	225190000	212010000	129170000	115280000	141910000	211990000	234530000	236850000	224730000	223140000	46.8	47	35.4
+	2.81308	-0.715026	O22287	O22287	1141	CYT1	Mannose-1-phosphate guanylyltransferase 1	cellulose biosynthetic process [GO:0030244];defense response to bacterium [GO:0042742];GDP-mannose biosynthetic process [GO:0009298];L-ascorbic acid biosynthetic process [GO:0019853];response to ammonium ion [GO:0060359];response to heat [GO:0009408];response to jasmonic acid [GO:0009753];response to ozone [GO:0010193];response to salt stress [GO:0009651]	cytosol [GO:0005829];nucleus [GO:0005634]	GTP binding [GO:0005525];mannose-1-phosphate guanylyltransferase activity [GO:0004475]	+	34	34	34	76.5	76.5	76.5	39.577	0	179.85	28808000000	336	1987600000	2625300000	2096000000	2013900000	2580100000	2694300000	2395200000	2601500000	519760000	479060000	547260000	544080000	480100000	643260000	613920000	653410000	332680000	238790000	320960000	416920000	1122500000	1004300000	960470000	936260000	75.3	73.7	60.9
+	6.39673	-0.719677	P46644	P46644	1819	ASP3	Aspartate aminotransferase 3, chloroplastic	2-oxoglutarate metabolic process [GO:0006103];aspartate metabolic process [GO:0006531];biosynthetic process [GO:0009058];glutamate metabolic process [GO:0006536];leaf senescence [GO:0010150]	chloroplast [GO:0009507];cytosol [GO:0005829];peroxisome [GO:0005777];plasma membrane [GO:0005886];plastid [GO:0009536]	L-aspartate:2-oxoglutarate aminotransferase activity [GO:0004069];pyridoxal phosphate binding [GO:0030170]	+	50	49	44	74.2	74.2	70.8	48.954	0	323.31	76184000000	621	8415800000	9246900000	7285100000	6485300000	7347500000	7660700000	6703700000	6447300000	2196600000	2025700000	2540500000	2559000000	398850000	409860000	479940000	468210000	368850000	267830000	439130000	462720000	999090000	1050200000	907090000	1018200000	73.3	74.2	74.2
+	2.65813	-0.719765	Q1WIQ6	Q1WIQ6	2118	ALDH11A3	NADP-dependent glyceraldehyde-3-phosphate dehydrogenase		cytoplasm [GO:0005737]	glyceraldehyde-3-phosphate dehydrogenase (NADP+) (non-phosphorylating) activity [GO:0008886];lactaldehyde dehydrogenase activity [GO:0008911]	+	65	65	65	90.5	90.5	90.5	53.06	0	323.31	247760000000	1120	100650000	103070000	37049000	60329000	137080000	91867000	61605000	113760000	11713000000	11518000000	12525000000	9998100000	12426000000	13754000000	13758000000	14160000000	17280000000	10245000000	17338000000	18084000000	20703000000	19436000000	20085000000	24030000000	21.4	21	4
+	1.9241	-0.721877	F4JL11	F4JL11	881	IMPA2	Importin subunit alpha-2	NLS-bearing protein import into nucleus [GO:0006607]	cytosol [GO:0005829];host cell nucleus [GO:0042025];nuclear envelope [GO:0005635];nucleolus [GO:0005730];nucleus [GO:0005634];plasmodesma [GO:0009506]	nuclear import signal receptor activity [GO:0061608];nuclear localization sequence binding [GO:0008139]	+	41	24	24	79.3	61.9	61.9	58.906	0	323.31	32345000000	428	2084800000	2142200000	1542700000	1595100000	2706800000	2992800000	2525900000	2728500000	1113900000	1199900000	1321700000	1081000000	492320000	624780000	620320000	647270000	1008400000	610180000	1007400000	955870000	911700000	727570000	871320000	832900000	71.2	54.8	46.5
+	2.29097	-0.724563	P46416	P46416	1814	GSH2	Glutathione synthetase, chloroplastic	glutathione biosynthetic process [GO:0006750];response to jasmonic acid [GO:0009753]	chloroplast [GO:0009507];cytosol [GO:0005829];plastid [GO:0009536]	ATP binding [GO:0005524];glutathione binding [GO:0043295];glutathione synthase activity [GO:0004363];magnesium ion binding [GO:0000287];protein homodimerization activity [GO:0042803]	+	42	42	42	68.8	68.8	68.8	60.27	0	323.31	50561000000	494	4335000000	4852500000	3475900000	3567800000	4655500000	4858100000	4500700000	4813800000	803380000	698360000	1000600000	900090000	674350000	810210000	951010000	1027000000	553540000	284650000	485450000	623160000	1687300000	1722700000	1585100000	1695100000	65.7	62.2	60.7
+	1.39748	-0.725661	Q8VYI4	Q8VYI4	3128	At1g14810	Aspartate-semialdehyde dehydrogenase, putative	isoleucine biosynthetic process [GO:0009097];lysine biosynthetic process via diaminopimelate [GO:0009089];methionine biosynthetic process [GO:0009086];threonine biosynthetic process [GO:0009088]	chloroplast [GO:0009507];chloroplast stroma [GO:0009570];mitochondrion [GO:0005739];plastid [GO:0009536]	aspartate-semialdehyde dehydrogenase activity [GO:0004073];NAD binding [GO:0051287];NADP binding [GO:0050661];protein dimerization activity [GO:0046983]	+	33	33	33	76.8	76.8	76.8	40.745	0	323.31	120220000000	716	5401000000	5487000000	4504800000	4124900000	6336900000	6388500000	6344500000	6296300000	6238800000	4141800000	6174000000	4603000000	3284300000	3531600000	4145100000	3905400000	4487700000	3026900000	5140500000	4945000000	6300100000	5642700000	4900000000	4867100000	66.1	67.5	66.1
+	1.59382	-0.72714	F4HQD4	F4HQD4	528	HSP70-15	Heat shock 70 kDa protein 15		cell wall [GO:0005618];cytosol [GO:0005829];mitochondrion [GO:0005739];nucleus [GO:0005634];plasma membrane [GO:0005886];plasmodesma [GO:0009506]	ATP binding [GO:0005524]	+	116	25	25	91.6	36.8	36.8	91.68	0	323.31	54686000000	732	3326200000	3788100000	3043900000	2920700000	3569100000	3769900000	3759300000	4065600000	1727500000	1554100000	2008900000	1519800000	1030200000	1471600000	1315600000	1468300000	1922600000	1271900000	1900200000	2242500000	1885400000	1432000000	1888600000	1804200000	91.6	90.4	91.3
+	2.69597	-0.730513	Q02166	Q02166	2012	PAT1	Anthranilate phosphoribosyltransferase, chloroplastic	tryptophan biosynthetic process [GO:0000162]	chloroplast [GO:0009507];chloroplast envelope [GO:0009941];chloroplast stroma [GO:0009570];cytosol [GO:0005829];plastid [GO:0009536]	anthranilate phosphoribosyltransferase activity [GO:0004048]	+	16	16	16	37.8	37.8	37.8	46.52	0	84.126	12048000000	185	450850000	497830000	424270000	460400000	592290000	832810000	728860000	758310000	512800000	502010000	681830000	613670000	277130000	291250000	371490000	393300000	227620000	128000000	268410000	274650000	535430000	798370000	706610000	719590000	18.2	21.6	18.9
+	2.17847	-0.731435	Q93V74	Q93V74	3262	CYCLASE1	Cyclase-like protein 1	defense response [GO:0006952];negative regulation of programmed cell death [GO:0043069];tryptophan catabolic process to kynurenine [GO:0019441]	cell wall [GO:0005618];endoplasmic reticulum [GO:0005783];extracellular region [GO:0005576];Golgi apparatus [GO:0005794];plasma membrane [GO:0005886];secretory vesicle [GO:0099503]	arylformamidase activity [GO:0004061]	+	16	16	15	65.9	65.9	65.9	28.384	0	263.61	42623000000	280	4161600000	3068300000	2523500000	2142600000	2606700000	2405200000	2933700000	3002200000	2047900000	1854200000	1989800000	1774100000	508140000	876230000	962920000	864360000	1131700000	659120000	1171200000	985520000	1371000000	1226600000	1207400000	1149600000	65.9	62	63.9
+	3.16162	-0.732697	Q43314	Q43314	2312	GDH1	Glutamate dehydrogenase 1	glutamate catabolic process [GO:0006538];nitrogen compound metabolic process [GO:0006807];response to absence of light [GO:0009646];response to cadmium ion [GO:0046686]	mitochondrion [GO:0005739];plastid [GO:0009536]	ATP binding [GO:0005524];cobalt ion binding [GO:0050897];copper ion binding [GO:0005507];glutamate dehydrogenase (NAD+) activity [GO:0004352];glutamate dehydrogenase [NAD(P)+] activity [GO:0004353];zinc ion binding [GO:0008270]	+	45	36	26	73.2	66.7	49.4	44.524	0	323.31	74667000000	620	2287200000	2495700000	2127700000	2127100000	5929900000	6181000000	5283100000	5807400000	4514700000	3280400000	4493800000	3393300000	1444800000	2054900000	2001400000	2266600000	2041900000	1656100000	2117500000	2082600000	2822100000	2369500000	3045500000	2842500000	71	73	70.8
+	1.96016	-0.733171	Q9FEF8	Q9FEF8	3876	FIB1	rRNA 2'-O-methyltransferase fibrillarin 1	box C/D snoRNA 3'-end processing [GO:0000494];histone glutamine methylation [GO:1990258];rRNA methylation [GO:0031167]	box C/D snoRNP complex [GO:0031428];Cajal body [GO:0015030];nucleolus [GO:0005730];plastid [GO:0009536];small-subunit processome [GO:0032040]	histone-glutamine methyltransferase activity [GO:1990259];RNA binding [GO:0003723];rRNA methyltransferase activity [GO:0008649];snoRNA binding [GO:0030515]	+	35	3	3	62.7	11.4	11.4	32.829	0	25.959	1733800000	55	104100000	94289000	80995000	77502000	189060000	194100000	131420000	157330000	14030000	10240000	14852000	4962600	11292000	11266000	43014000	64946000	62212000	27680000	47020000	49908000	83651000	108750000	98554000	52653000	59.1	61.4	61.4
+	1.89112	-0.737578	O22229	O22229	1136	NTRC	NADPH-dependent thioredoxin reductase 3	cell redox homeostasis [GO:0045454];hydrogen peroxide catabolic process [GO:0042744];positive regulation of catalytic activity [GO:0043085];regulation of chlorophyll biosynthetic process [GO:0010380];regulation of starch biosynthetic process [GO:0010581];removal of superoxide radicals [GO:0019430]	chloroplast [GO:0009507];chloroplast stroma [GO:0009570];cytosol [GO:0005829]	enzyme activator activity [GO:0008047];identical protein binding [GO:0042802];oxidoreductase activity, acting on a sulfur group of donors, disulfide as acceptor [GO:0016671];thioredoxin-disulfide reductase activity [GO:0004791]	+	33	33	33	52.2	52.2	52.2	57.949	0	323.31	85369000000	459	241510000	202810000	1185500000	350750000	209130000	282470000	162920000	204230000	5933300000	5463000000	7174600000	6202200000	3921300000	4148800000	4887200000	4704100000	4701700000	3019000000	4889000000	5186300000	5480700000	5286900000	5869900000	5661500000	31.8	29.3	24.6
+	2.76081	-0.739264	Q43870	Q43870	2323	APS2	ATP sulfurylase 2	cellular response to sulfate starvation [GO:0009970];hydrogen sulfide biosynthetic process [GO:0070814];sulfate assimilation [GO:0000103]	chloroplast [GO:0009507];chloroplast stroma [GO:0009570];cytosol [GO:0005829];nucleus [GO:0005634]	ATP binding [GO:0005524];sulfate adenylyltransferase (ATP) activity [GO:0004781]	+	36	28	28	53.4	46.8	46.8	53.638	0	118.71	10090000000	173	1065200000	1177600000	914870000	776080000	1540500000	1228600000	1354100000	1339200000	43376000	111980000	40715000	42148000	42112000	26795000	15651000	17004000	0	19884000	14258000	13630000	126230000	60322000	43204000	76220000	47.9	46	48.1
+	1.43881	-0.74388	Q9SXE9	Q9SXE9	5725	At1g62480	At1g62480/T3P18_4	response to cadmium ion [GO:0046686]	cytosol [GO:0005829];nucleus [GO:0005634]		+	12	12	12	80.9	80.9	80.9	16.628	0	274.63	6630300000	94	248620000	280520000	222710000	268610000	921980000	716080000	797010000	926360000	496900000	507210000	487430000	412480000	3887600	1339000	1679000	4727400	76653000	38603000	71501000	94446000	10851000	8951100	10793000	20946000	36.8	56.6	54.6
+	5.08647	-0.744773	Q9SGC1	Q9SGC1	5307	At1g70730	Probable phosphoglucomutase, cytoplasmic 2	carbohydrate metabolic process [GO:0005975];glucose metabolic process [GO:0006006]	cytosol [GO:0005829]	magnesium ion binding [GO:0000287];phosphoglucomutase activity [GO:0004614]	+	70	49	49	93.3	72.3	72.3	63.481	0	323.31	68912000000	721	2981200000	3181900000	2675500000	2637600000	3503900000	3357100000	3066800000	2999800000	2350500000	2272700000	2609000000	2294900000	2291100000	2862300000	2771300000	2980200000	1221200000	766550000	1201300000	1437400000	5120000000	4696900000	4879200000	4753900000	85.1	89.7	86.2
+	2.87471	-0.74521	Q9LTB2	Q9LTB2	4708	MMT1	Methionine S-methyltransferase	biosynthetic process [GO:0009058];methylation [GO:0032259];S-adenosylmethionine metabolic process [GO:0046500];selenium compound metabolic process [GO:0001887]	cytosol [GO:0005829];plastid [GO:0009536]	methionine S-methyltransferase activity [GO:0030732];pyridoxal phosphate binding [GO:0030170];S-adenosylmethionine-dependent methyltransferase activity [GO:0008757]	+	76	76	76	67.3	67.3	67.3	118.71	0	323.31	99248000000	762	10390000000	10260000000	8642100000	8620500000	11307000000	11478000000	11681000000	12739000000	981570000	808460000	878110000	645230000	893350000	864680000	676270000	743250000	449230000	404500000	482820000	485390000	1480200000	1572400000	1292700000	1471800000	59.2	62	59.7
+	2.85747	-0.749983	Q9LVI9	Q9LVI9	4784	PYD1	Dihydropyrimidine dehydrogenase (NADP(+)), chloroplastic	beta-alanine biosynthetic process [GO:0019483];cellular response to nitrogen levels [GO:0043562];thymine catabolic process [GO:0006210];uracil catabolic process [GO:0006212]	chloroplast [GO:0009507];chloroplast stroma [GO:0009570];plastid [GO:0009536]	dihydropyrimidine dehydrogenase (NADP+) activity [GO:0017113];iron-sulfur cluster binding [GO:0051536];NADP binding [GO:0050661];uracil binding [GO:0002058]	+	40	40	40	70.4	70.4	70.4	46.846	0	323.31	93637000000	644	4692400000	5050600000	3811200000	4092300000	5129600000	6159500000	7184900000	7466100000	5624700000	5444600000	3894000000	3839700000	2148600000	2448600000	2376000000	2562600000	2452400000	1855600000	2335500000	2383600000	3654700000	3052100000	3513300000	2464200000	69.7	68.5	67.8
+	1.6497	-0.754277	Q9FWR4	Q9FWR4	4286	DHAR1	Glutathione S-transferase DHAR1, mitochondrial	cellular response to hydrogen peroxide [GO:0070301];defense response [GO:0006952];positive regulation of salicylic acid mediated signaling pathway [GO:0080151];protein glutathionylation [GO:0010731];regulation of interspecies interactions between organisms [GO:0043903];regulation of ion transmembrane transport [GO:0034765];response to jasmonic acid [GO:0009753];response to ozone [GO:0010193];resp…	apoplast [GO:0048046];chloroplast [GO:0009507];chloroplast stroma [GO:0009570];cytosol [GO:0005829];mitochondrion [GO:0005739];nucleus [GO:0005634];peroxisome [GO:0005777];plasma membrane [GO:0005886];vacuole [GO:0005773]	copper ion binding [GO:0005507];glutathione dehydrogenase (ascorbate) activity [GO:0045174];glutathione transferase activity [GO:0004364];voltage-gated ion channel activity [GO:0005244]	+	38	38	38	99.5	99.5	99.5	23.641	0	323.31	268090000000	1076	6180000000	6417400000	4537000000	5114000000	11573000000	11650000000	13012000000	12747000000	14929000000	13316000000	14582000000	13234000000	7756800000	10412000000	11902000000	11897000000	11077000000	5780400000	10775000000	10463000000	15466000000	13615000000	15744000000	15908000000	99.5	97.7	94.4
+	1.47118	-0.756446	Q6NMA9	Q6NMA9	2453	At5g45170	At5g45170		chloroplast [GO:0009507];chloroplast stroma [GO:0009570]	hydrolase activity [GO:0016787]	+	35	35	35	68.3	68.3	68.3	40.741	0	323.31	41795000000	366	91317000	112920000	62770000	123510000	122810000	163100000	115130000	101000000	2426800000	2262600000	3013100000	2401500000	1721400000	2392000000	2364500000	2596600000	2504700000	1160100000	2540400000	2558000000	2999700000	3137800000	3231400000	3592300000	26.1	26.1	22.6
+	1.7464	-0.757595	Q9FNK4	Q9FNK4	4220	DELTA-OAT	Ornithine aminotransferase, mitochondrial	arginine catabolic process to glutamate [GO:0019544];arginine catabolic process to proline via ornithine [GO:0010121];defense response to bacterium, incompatible interaction [GO:0009816];hyperosmotic salinity response [GO:0042538];mitochondrion localization [GO:0051646];ornithine catabolic process [GO:0006593];plant-type hypersensitive response [GO:0009626];proline biosynthetic process [GO:000656…	cytoplasm [GO:0005737];mitochondrial matrix [GO:0005759];mitochondrion [GO:0005739];plastid [GO:0009536]	identical protein binding [GO:0042802];ornithine(lysine) transaminase activity [GO:0050155];ornithine-oxo-acid transaminase activity [GO:0004587];pyridoxal phosphate binding [GO:0030170];zinc ion binding [GO:0008270]	+	15	15	15	35.8	35.8	35.8	52.177	0	92.689	5113100000	99	333540000	306210000	233940000	214780000	296950000	284060000	271100000	269500000	360430000	341770000	436210000	256810000	56661000	71336000	141410000	78206000	112400000	29353000	117780000	100540000	221120000	183490000	265710000	129780000	31.6	25.9	21.3
+	1.57442	-0.75845	Q8W108	Q8W108	3211	ARD3	1,2-dihydroxy-3-keto-5-methylthiopentene dioxygenase 3	L-methionine salvage from methylthioadenosine [GO:0019509];methionine metabolic process [GO:0006555]	cytoplasm [GO:0005737];nucleus [GO:0005634]	acireductone dioxygenase [iron(II)-requiring] activity [GO:0010309];iron ion binding [GO:0005506]	+	21	21	4	87.9	87.9	15.6	23.356	0	180.63	27989000000	325	1020800000	1153100000	799010000	799200000	1537300000	1538900000	1432100000	1703000000	1162800000	1096800000	1390500000	1403000000	687820000	1075500000	1401100000	933110000	825920000	644280000	1017400000	1019500000	1338400000	1366000000	1381900000	1261600000	83.4	80.4	71.9
+	2.05857	-0.758786	Q9LYG3	Q9LYG3	4867	NADP-ME2	NADP-dependent malic enzyme 2	malate metabolic process [GO:0006108];pentose-phosphate shunt, oxidative branch [GO:0009051];pyruvate metabolic process [GO:0006090];response to cadmium ion [GO:0046686]	apoplast [GO:0048046];cell wall [GO:0005618];chloroplast [GO:0009507];cytosol [GO:0005829];plasma membrane [GO:0005886];plasmodesma [GO:0009506];vacuolar membrane [GO:0005774]	malate dehydrogenase (decarboxylating) (NAD+) activity [GO:0004471];malate dehydrogenase (decarboxylating) (NADP+) activity [GO:0004473];malic enzyme activity [GO:0004470];metal ion binding [GO:0046872];NAD binding [GO:0051287];oxaloacetate decarboxylase activity [GO:0008948]	+	72	72	52	91.3	91.3	70.9	64.412	0	323.31	427840000000	1806	12281000000	13408000000	10225000000	9424300000	28561000000	29972000000	25998000000	29631000000	15276000000	11356000000	14622000000	13021000000	10880000000	15950000000	16415000000	15094000000	19375000000	10986000000	18551000000	18650000000	22392000000	22505000000	22487000000	20776000000	85.2	90.6	85.7
+	2.6799	-0.762012	Q940M2	Q940M2	3387	AGT2	Alanine--glyoxylate aminotransferase 2 homolog 1, mitochondrial	photorespiration [GO:0009853];response to cadmium ion [GO:0046686]	mitochondrion [GO:0005739];plasma membrane [GO:0005886];vacuolar membrane [GO:0005774]	alanine-glyoxylate transaminase activity [GO:0008453];pyridoxal phosphate binding [GO:0030170];zinc ion binding [GO:0008270]	+	42	42	42	88.2	88.2	88.2	51.952	0	323.31	103090000000	874	6558300000	7828800000	5530900000	5613500000	8893100000	9090600000	7442200000	8603700000	3802100000	3535100000	4447400000	4234300000	1592500000	1969000000	2274900000	2018300000	2360900000	1462400000	2332700000	2153300000	2637500000	2646400000	2888500000	3170700000	87	83	75
+	3.8142	-0.762067	Q94AD1	Q94AD1	3469	At1g48610	Putative DNA-binding protein At1g48610		nucleus [GO:0005634]	DNA binding [GO:0003677]	+	6	6	6	38.2	38.2	38.2	21.674	0	18.107	1334900000	36	32711000	26126000	10755000	13189000	19578000	17908000	28802000	19827000	0	0	0	0	13660000	37029000	20966000	17400000	172890000	76335000	169060000	166340000	125940000	88676000	115590000	162140000	26.9	19.3	6.1
+	1.4616	-0.762103	Q8LPL7	Q8LPL7	2961	MAPDA	N6-mAMP deaminase	nucleotide metabolic process [GO:0009117];RNA catabolic process [GO:0006401]	cytosol [GO:0005829]	deaminase activity [GO:0019239];metal ion binding [GO:0046872];N6-mAMP deaminase activity [GO:0062154]	+	7	7	7	20	20	20	39.948	0	7.6197	632330000	39	0	6648900	0	0	0	0	10694000	2353100	13907000	0	43245000	31209000	0	25881000	38784000	30323000	45471000	3730700	64337000	50974000	62631000	82720000	41342000	78078000	0	3.1	0
+	1.58439	-0.776056	Q8VXZ7	Q8VXZ7	3096	AGAL3	Alpha-galactosidase 3	carbohydrate metabolic process [GO:0005975];cell wall organization [GO:0071555]	apoplast [GO:0048046];plant-type cell wall [GO:0009505];secretory vesicle [GO:0099503];vacuole [GO:0005773]	alpha-galactosidase activity [GO:0004557];raffinose alpha-galactosidase activity [GO:0052692]	+	23	23	23	48.5	48.5	48.5	48.362	0	323.31	45717000000	342	3874300000	3958600000	3277200000	3257900000	3587000000	2681200000	3058300000	2825800000	1629100000	1431600000	1598500000	1389100000	718560000	726510000	859810000	764140000	1310300000	915350000	1317900000	1434200000	1357300000	1219900000	1160700000	1363900000	41.6	41.6	35
+	1.61925	-0.777668	Q9SIE1	Q9SIE1	5357	PAT	Bifunctional aspartate aminotransferase and glutamate/aspartate-prephenate aminotransferase	aromatic amino acid family biosynthetic process, prephenate pathway [GO:0009095];embryo development ending in seed dormancy [GO:0009793];L-phenylalanine biosynthetic process [GO:0009094]	chloroplast [GO:0009507];chloroplast stroma [GO:0009570]	aspartate-prephenate aminotransferase activity [GO:0033853];glutamate-prephenate aminotransferase activity [GO:0033854];L-aspartate:2-oxoglutarate aminotransferase activity [GO:0004069];pyridoxal phosphate binding [GO:0030170]	+	33	33	33	64.2	64.2	64.2	50.999	0	278.43	22410000000	268	1774500000	1919300000	1272200000	1628300000	1603300000	1394200000	1599500000	1565200000	449530000	549160000	646120000	683310000	411740000	497300000	555540000	573630000	396790000	171670000	472260000	1136800000	742140000	738400000	831340000	797890000	55.6	61.3	53.9
+	2.20303	-0.780216	P42799	P42799	1788	GSA1	Glutamate-1-semialdehyde 2,1-aminomutase 1, chloroplastic	chlorophyll biosynthetic process [GO:0015995];porphyrin-containing compound biosynthetic process [GO:0006779];protoporphyrinogen IX biosynthetic process [GO:0006782]	apoplast [GO:0048046];chloroplast [GO:0009507];chloroplast envelope [GO:0009941];chloroplast stroma [GO:0009570];cytosol [GO:0005829];plastid [GO:0009536]	glutamate-1-semialdehyde 2,1-aminomutase activity [GO:0042286];protein homodimerization activity [GO:0042803];pyridoxal phosphate binding [GO:0030170];transaminase activity [GO:0008483]	+	43	26	26	74.1	47.7	47.7	50.369	0	323.31	71376000000	382	329010000	347210000	281220000	269250000	431980000	380060000	376940000	395800000	5484500000	5025200000	5893200000	5226500000	2692700000	3474000000	3468300000	3442400000	4511600000	2765700000	3988500000	4388300000	4683000000	4213300000	4325700000	4981000000	48.3	51.3	37.1
+	2.98128	-0.780479	Q9SGZ5	Q9SGZ5	5324	BXL7	Probable beta-D-xylosidase 7	arabinan catabolic process [GO:0031222];xylan catabolic process [GO:0045493]	apoplast [GO:0048046];cell wall [GO:0005618];chloroplast [GO:0009507];mitochondrion [GO:0005739];plant-type cell wall [GO:0009505];plasmodesma [GO:0009506]	alpha-L-arabinofuranosidase activity [GO:0046556];hydrolase activity, hydrolyzing O-glycosyl compounds [GO:0004553];xylan 1,4-beta-xylosidase activity [GO:0009044]	+	54	54	54	62.5	62.5	62.5	83.891	0	323.31	53021000000	639	1285000000	1351000000	1333200000	1366400000	1505500000	1589800000	1869800000	1446400000	2319000000	2056800000	2263700000	2236700000	2138200000	2369400000	2561600000	2638900000	2221100000	1676400000	2272300000	2046200000	3693700000	3543800000	3891900000	3343900000	46.8	44.7	35.6
+	1.71163	-0.782218	Q9M336	Q9M336	5033	UPP	Uracil phosphoribosyltransferase, chloroplastic	cellular response to phosphate starvation [GO:0016036];developmental process [GO:0032502];nucleoside metabolic process [GO:0009116];UMP salvage [GO:0044206];uracil salvage [GO:0006223]	chloroplast [GO:0009507];chloroplast stroma [GO:0009570];cytosol [GO:0005829];plastid [GO:0009536]	GTP binding [GO:0005525];kinase activity [GO:0016301];uracil phosphoribosyltransferase activity [GO:0004845]	+	24	24	24	65.2	65.2	65.2	32.195	0	180.34	27666000000	288	333030000	277300000	230660000	284560000	265360000	385740000	356650000	375420000	2178200000	2089100000	2461300000	2242400000	942900000	1018300000	1029200000	1159300000	1146100000	761380000	1447700000	1369500000	1592000000	1961400000	1493100000	2265700000	53.4	50.7	42.9
+	2.18346	-0.782807	Q38950	Q38950	2166	PP2AA2	Serine/threonine-protein phosphatase 2A 65 kDa regulatory subunit A beta isoform	protein dephosphorylation [GO:0006470];regulation of phosphorylation [GO:0042325];response to cadmium ion [GO:0046686]	cytoplasm [GO:0005737];cytosol [GO:0005829];nucleus [GO:0005634];peroxisome [GO:0005777];plasma membrane [GO:0005886];protein phosphatase type 2A complex [GO:0000159];protein serine/threonine phosphatase complex [GO:0008287]	protein phosphatase regulator activity [GO:0019888]	+	38	28	23	70.2	54.2	43.8	65.597	0	323.31	21430000000	320	1929000000	1936500000	1511500000	1561600000	2352400000	2633100000	2553600000	2831400000	216310000	190050000	201110000	198130000	172580000	228300000	266230000	226430000	187270000	135370000	227930000	223880000	436950000	365980000	388370000	456010000	61.3	60.3	61.2
+	1.71254	-0.785562	Q05728	Q05728	2023	PUR5	Phosphoribosylformylglycinamidine cyclo-ligase, chloroplastic	adenine biosynthetic process [GO:0046084];'de novo' IMP biosynthetic process [GO:0006189];purine nucleotide biosynthetic process [GO:0006164]	chloroplast [GO:0009507];chloroplast stroma [GO:0009570];cytosol [GO:0005829];mitochondrion [GO:0005739]	ATP binding [GO:0005524];copper ion binding [GO:0005507];phosphoribosylamine-glycine ligase activity [GO:0004637];phosphoribosylformylglycinamidine cyclo-ligase activity [GO:0004641]	+	23	23	23	64.5	64.5	64.5	41.504	0	323.31	37000000000	435	1004300000	1182100000	1036900000	938040000	1512500000	1794000000	1345600000	1655900000	2234000000	2234700000	2383800000	1892600000	1108400000	1342500000	1255400000	1249300000	1681400000	1081700000	1562100000	1517200000	1869100000	1513700000	1870100000	1734400000	59.9	57.6	59.6
+	2.63753	-0.78822	A0A1P8AU99	A0A1P8AU99	128	RDH2	Rhodanese homologue 2			thiosulfate sulfurtransferase activity [GO:0004792]	+	18	17	17	69.5	67.3	67.3	29.451	0	118.19	11542000000	195	339880000	266960000	346840000	190850000	507660000	543470000	500910000	511780000	285070000	261020000	326960000	306770000	400140000	455140000	493020000	502920000	618460000	406770000	533230000	571020000	808120000	783120000	704780000	876920000	46.2	40.2	58.6
+	1.92444	-0.789626	Q9M9P0	Q9M9P0	5089	EXPA13	Expansin-A13	plant-type cell wall organization [GO:0009664]	cell wall [GO:0005618];extracellular region [GO:0005576];membrane [GO:0016020]		+	3	3	3	15	15	15	28.975	0	6.0684	468170000	7	10156000	0	0	0	8269200	8367800	12380000	10418000	66214000	29501000	19448000	43227000	10997000	26460000	10979000	19660000	18113000	0	19142000	24629000	54910000	17945000	41965000	15387000	4.9	0	0
+	1.74319	-0.791592	Q9FUS6	Q9FUS6	4260	GSTU13	Glutathione S-transferase U13	defense response by callose deposition [GO:0052542];defense response to fungus [GO:0050832];glutathione metabolic process [GO:0006749];indole glucosinolate catabolic process [GO:0042344];innate immune response [GO:0045087];response to cadmium ion [GO:0046686];toxin catabolic process [GO:0009407]	cytoplasm [GO:0005737];cytosol [GO:0005829];nucleus [GO:0005634]	glutathione transferase activity [GO:0004364]	+	23	23	21	53.7	53.7	49.8	25.131	0	103.87	21915000000	292	1288000000	1166300000	907730000	786600000	1080100000	1252600000	1094800000	1322500000	810240000	543560000	950200000	895420000	589410000	712000000	732010000	669440000	804900000	382950000	705170000	659110000	1206400000	1182900000	1113200000	1059000000	53.7	48.5	48.5
+	2.90681	-0.791704	Q56Z59	Q56Z59	2357	PATL3	Patellin-3	cell cycle [GO:0007049];cell division [GO:0051301]	cytoplasm [GO:0005737];plasma membrane [GO:0005886]	lipid binding [GO:0008289]	+	62	62	58	80.6	80.6	78.2	56.104	0	323.31	94939000000	875	5178000000	6361900000	4848800000	4640900000	5809600000	6958300000	5584400000	6746200000	4095000000	3966400000	5006900000	4280400000	1660500000	2239700000	2112800000	2282900000	2332400000	1529500000	2621300000	2436500000	3736100000	3483200000	3297100000	3729900000	80	80.2	77.8
+	2.05961	-0.792551	F4KFT7	F4KFT7	1053	TH2	Bifunctional TH2 protein, mitochondrial	thiamine biosynthetic process [GO:0009228]	cytosol [GO:0005829];mitochondrion [GO:0005739]	thiaminase activity [GO:0050334];thiamine phosphate phosphatase activity [GO:0042131]	+	19	19	19	31.1	31.1	31.1	68.963	0	47.515	5220800000	138	296940000	308070000	304020000	238900000	404930000	423120000	368300000	399540000	149490000	125570000	159290000	149770000	141060000	140050000	105190000	137760000	123950000	99655000	94810000	104990000	254560000	256830000	223370000	210570000	24	26.6	28.4
+	2.48185	-0.799609	Q39119	Q39119	2195	At4g32940	Vacuolar-processing enzyme gamma-isozyme	leaf senescence [GO:0010150];proteolysis involved in cellular protein catabolic process [GO:0051603];response to ethylene [GO:0009723];response to jasmonic acid [GO:0009753];response to salicylic acid [GO:0009751];response to wounding [GO:0009611];vacuolar protein processing [GO:0006624]	lytic vacuole [GO:0000323];protein storage vacuole [GO:0000326]	cysteine-type endopeptidase activity [GO:0004197];endopeptidase activity [GO:0004175]	+	18	18	18	46.2	46.2	46.2	54.335	0	315.07	11690000000	118	1199900000	1082200000	736720000	547990000	505170000	413410000	323780000	384320000	72183000	62988000	73155000	91651000	264720000	329070000	163970000	345540000	515270000	255870000	528440000	367450000	811330000	835020000	895270000	884110000	38.9	29.6	32
+	2.78629	-0.800272	Q9LIE9	Q9LIE9	4477	CWLP	At3g22120				+	3	3	3	8.7	8.7	8.7	34.669	0	13.778	2499600000	28	0	16776000	10745000	0	21692000	20427000	22665000	18047000	72470000	62888000	96754000	88676000	148180000	147910000	62896000	106750000	118370000	193980000	276630000	149470000	168010000	100510000	306060000	289670000	0	5.4	5.4
+	2.79695	-0.800627	P52420	P52420	1881	PUR2	Phosphoribosylamine--glycine ligase, chloroplastic	'de novo' IMP biosynthetic process [GO:0006189];purine nucleobase biosynthetic process [GO:0009113]	chloroplast [GO:0009507];chloroplast stroma [GO:0009570]	ATP binding [GO:0005524];metal ion binding [GO:0046872];phosphoribosylamine-glycine ligase activity [GO:0004637]	+	30	30	30	53.8	53.8	53.8	56.473	0	323.31	33775000000	389	553740000	594980000	468210000	460590000	565620000	698270000	776730000	710180000	1844500000	1699900000	1952100000	1654900000	1426900000	1803300000	1738700000	1752400000	1673700000	984760000	1518300000	1547700000	2471800000	2209800000	2408600000	2258800000	33.1	41.7	31.6
+	1.75359	-0.818298	Q9M9D9	Q9M9D9	5080	At1g15540	2-oxoglutarate-dependent dioxygenase-like protein		extracellular region [GO:0005576]	dioxygenase activity [GO:0051213];metal ion binding [GO:0046872]	+	1	1	1	3.1	3.1	3.1	37.334	0.0020385	2.2008	7002100000	22	1636400000	862670000	417870000	714550000	768790000	117720000	621780000	920250000	52505000	60943000	54322000	55874000	52439000	52795000	50376000	61080000	36917000	38260000	49845000	46172000	93829000	84007000	77721000	75012000	3.1	3.1	3.1
+	1.69609	-0.818429	Q9S7Y7	Q9S7Y7	5165	XYL1	Alpha-xylosidase 1	cell wall organization [GO:0071555];response to cadmium ion [GO:0046686];xylan catabolic process [GO:0045493];xyloglucan metabolic process [GO:0010411]	apoplast [GO:0048046];cell wall [GO:0005618];mitochondrion [GO:0005739];plant-type cell wall [GO:0009505];plasmodesma [GO:0009506]	alpha-D-xyloside xylohydrolase [GO:0061634];alpha-L-arabinofuranosidase activity [GO:0046556];carbohydrate binding [GO:0030246];xylan 1,4-beta-xylosidase activity [GO:0009044];xyloglucan 1,6-alpha-xylosidase activity [GO:0080176]	+	47	47	47	54.6	54.6	54.6	102.4	0	323.31	43718000000	640	388970000	521160000	363440000	300420000	1029400000	993460000	886000000	859490000	3268000000	2638500000	3058200000	2631400000	1680400000	2077700000	1972600000	1867900000	2393300000	1603900000	2845400000	2619000000	2815600000	2542500000	2381500000	1979600000	25	29	27.9
+	3.0889	-0.826674	Q8L7B2	Q8L7B2	2799	SCPL20	Serine carboxypeptidase-like 20	secondary metabolic process [GO:0019748]	extracellular region [GO:0005576];peroxisome [GO:0005777];vacuole [GO:0005773]	serine-type carboxypeptidase activity [GO:0004185];transferase activity, transferring acyl groups other than amino-acyl groups [GO:0016747]	+	16	16	16	31	31	31	55.832	0	115.8	10461000000	172	78830000	99925000	71613000	57141000	139350000	107670000	91871000	117950000	365260000	330990000	420740000	408040000	566160000	539660000	650910000	635260000	519780000	340350000	572460000	523050000	1086100000	892240000	963630000	881650000	14.9	11.7	9.3
+	1.34822	-0.836306	Q8LDU4	Q8LDU4	2904	RCCR	Red chlorophyll catabolite reductase, chloroplastic	chlorophyll catabolic process [GO:0015996];defense response, incompatible interaction [GO:0009814];regulation of plant-type hypersensitive response [GO:0010363];regulation of programmed cell death [GO:0043067]	chloroplast [GO:0009507];chloroplast envelope [GO:0009941];chloroplast stroma [GO:0009570];chloroplast thylakoid membrane [GO:0009535];cytoplasm [GO:0005737];cytosol [GO:0005829];mitochondrion [GO:0005739];plasma membrane [GO:0005886]	red chlorophyll catabolite reductase activity [GO:0051743]	+	40	40	39	81.8	81.8	81.8	36.448	0	323.31	87399000000	748	197580000	171750000	84633000	152920000	110530000	178440000	141520000	145570000	5377700000	4454400000	5864600000	5151900000	3732500000	4829000000	5099700000	4961000000	4757900000	3235600000	5240900000	5031700000	7283100000	7160300000	6837800000	7197800000	50.8	33.9	24.8
+	2.71895	-0.837158	Q2V465	Q2V465	2129	SCPL11	Serine carboxypeptidase-like 11	secondary metabolic process [GO:0019748]	extracellular region [GO:0005576]	serine-type carboxypeptidase activity [GO:0004185];transferase activity, transferring acyl groups other than amino-acyl groups [GO:0016747]	+	24	24	16	50.8	50.8	41.6	49.232	0	144.83	20231000000	305	1590200000	1276600000	826710000	1040500000	1074600000	1124400000	1044500000	1081500000	670920000	537680000	449550000	484420000	522600000	681430000	629440000	670560000	682060000	557210000	841960000	682770000	1033500000	891300000	871950000	964580000	49.2	48.3	35.1
+	1.74114	-0.83742	Q8LBN7	Q8LBN7	2871	At4g33640	Costars family protein At4g33640	regulation of actin filament-based process [GO:0032970]	cytosol [GO:0005829]		+	5	5	5	69.5	69.5	69.5	10.42	0	19.903	2298200000	53	60587000	65612000	24986000	62468000	271560000	255980000	154490000	249100000	55467000	57429000	50346000	43784000	70510000	68435000	65535000	90381000	49689000	35946000	52690000	47406000	80248000	135050000	117210000	133270000	29.5	29.5	28.4
+	1.72133	-0.838262	Q9FI97	Q9FI97	4005	UGT76C5	UDP-glycosyltransferase 76C5		cytosol [GO:0005829];intracellular membrane-bounded organelle [GO:0043231]	nicotinate-N-glucosyltransferase activity [GO:0050139];quercetin 3-O-glucosyltransferase activity [GO:0080043];quercetin 7-O-glucosyltransferase activity [GO:0080044];UDP-glycosyltransferase activity [GO:0008194]	+	15	15	13	32.7	32.7	29.5	51.737	0	84.308	4059300000	88	376350000	360550000	292160000	258610000	470030000	568970000	418250000	495660000	58124000	51927000	47046000	67854000	29399000	45123000	42334000	53894000	26584000	31595000	25772000	45757000	68153000	56042000	79523000	89578000	27.3	32.5	26.6
+	1.71844	-0.84097	Q94F08	Q94F08	3541	HIPL2	HIPL2 protein		anchored component of membrane [GO:0031225];anchored component of plasma membrane [GO:0046658];plasma membrane [GO:0005886];plastid [GO:0009536]	oxidoreductase activity [GO:0016491]	+	19	19	18	25.6	25.6	25.6	75.617	0	96.478	6385900000	209	142310000	107080000	73047000	64009000	201490000	176680000	244120000	222840000	318300000	298240000	302240000	132410000	231780000	315420000	283700000	386100000	343090000	203430000	360650000	268450000	450100000	386260000	481720000	392450000	12.9	13.9	10.2
+	2.47615	-0.846042	P25696	P25696	1675	ENO2	Bifunctional enolase 2/transcriptional activator	glycolytic process [GO:0006096];regulation of vacuole fusion, non-autophagic [GO:0032889];response to abscisic acid [GO:0009737];response to cadmium ion [GO:0046686];response to cold [GO:0009409];response to light stimulus [GO:0009416]	apoplast [GO:0048046];chloroplast [GO:0009507];cytoplasm [GO:0005737];cytosol [GO:0005829];endoplasmic reticulum [GO:0005783];mitochondrial envelope [GO:0005740];mitochondrial outer membrane [GO:0005741];mitochondrion [GO:0005739];nucleus [GO:0005634];phosphopyruvate hydratase complex [GO:0000015];plasma membrane [GO:0005886];plasmodesma [GO:0009506]	copper ion binding [GO:0005507];DNA binding [GO:0003677];magnesium ion binding [GO:0000287];phosphopyruvate hydratase activity [GO:0004634]	+	82	82	81	99.8	99.8	99.8	47.719	0	323.31	1462900000000	3694	87733000000	97609000000	81634000000	77022000000	98404000000	102500000000	97628000000	93886000000	55737000000	50305000000	57447000000	51353000000	33326000000	37681000000	37691000000	38162000000	47450000000	33061000000	47368000000	44805000000	48822000000	45930000000	49876000000	47483000000	99.8	99.8	99.8
+	2.24233	-0.849656	P25857	P25857	1684	GAPB	Glyceraldehyde-3-phosphate dehydrogenase GAPB, chloroplastic	glucose metabolic process [GO:0006006];reductive pentose-phosphate cycle [GO:0019253];response to cadmium ion [GO:0046686];response to cold [GO:0009409];response to light stimulus [GO:0009416];response to sucrose [GO:0009744]	apoplast [GO:0048046];chloroplast [GO:0009507];chloroplast envelope [GO:0009941];chloroplast membrane [GO:0031969];chloroplast stroma [GO:0009570];chloroplast thylakoid membrane [GO:0009535];nucleus [GO:0005634];stromule [GO:0010319]	glyceraldehyde-3-phosphate dehydrogenase (NAD+) (phosphorylating) activity [GO:0004365];glyceraldehyde-3-phosphate dehydrogenase (NADP+) (phosphorylating) activity [GO:0047100];NAD binding [GO:0051287];NADP binding [GO:0050661]	+	60	48	48	77.9	71.6	71.6	47.659	0	323.31	828600000000	2076	64831000	37100000	18506000	33656000	57034000	44925000	45713000	18809000	60080000000	48071000000	56395000000	51078000000	41964000000	45027000000	49280000000	48984000000	42485000000	29063000000	48325000000	44234000000	70247000000	61824000000	68339000000	62883000000	26.6	19.7	11.6
+	2.54649	-0.850312	Q94KE3	Q94KE3	3586	At3g52990	Pyruvate kinase	glycolytic process [GO:0006096];response to cadmium ion [GO:0046686]	cytoplasm [GO:0005737];cytosol [GO:0005829]	kinase activity [GO:0016301];magnesium ion binding [GO:0000287];potassium ion binding [GO:0030955];pyruvate kinase activity [GO:0004743]	+	52	52	21	84.1	84.1	41.4	57.495	0	323.31	178230000000	862	11453000000	14430000000	11268000000	11579000000	12315000000	14131000000	13629000000	13000000000	4063200000	3579200000	4854100000	4637400000	3375100000	3563000000	4316900000	4257000000	5426700000	3469100000	6235900000	6277700000	5821100000	5058100000	5444900000	6050700000	80.8	82.2	79.3
+	2.34457	-0.853098	Q3ECP6	Q3ECP6	2239	At1g54790	GDSL esterase/lipase At1g54790	lipid catabolic process [GO:0016042]	extracellular region [GO:0005576]	hydrolase activity, acting on ester bonds [GO:0016788]	+	4	4	4	14.2	14.2	14.2	45.38	0	10.658	1505500000	13	32817000	8702400	19506000	13995000	38603000	12213000	15099000	18060000	92841000	24245000	79639000	122260000	29065000	71674000	69757000	53525000	98899000	10664000	76398000	60432000	154140000	97710000	139550000	165720000	11.3	5.1	5.1
+	2.18376	-0.864141	Q08298	Q08298	2037	RD22	BURP domain protein RD22	response to salt stress [GO:0009651]	endosome [GO:0005768];Golgi apparatus [GO:0005794];trans-Golgi network [GO:0005802]		+	15	15	15	32.1	32.1	32.1	42.259	0	149.31	11447000000	118	0	0	0	29647000	0	0	7122100	0	336860000	407730000	361700000	292880000	641490000	621460000	847030000	713220000	609320000	355040000	627830000	400470000	1335400000	1201700000	1447600000	1210600000	0	0	0
+	2.24343	-0.866826	O23627;Q9FXG2	O23627	1242	At1g29880	Glycine--tRNA ligase, mitochondrial 1	diadenosine tetraphosphate biosynthetic process [GO:0015966];glycyl-tRNA aminoacylation [GO:0006426];mitochondrial glycyl-tRNA aminoacylation [GO:0070150];response to cadmium ion [GO:0046686]	chloroplast [GO:0009507];cytoplasm [GO:0005737];cytosol [GO:0005829];endosome [GO:0005768];Golgi apparatus [GO:0005794];mitochondrion [GO:0005739];nucleus [GO:0005634];trans-Golgi network [GO:0005802]	ATP binding [GO:0005524];glycine-tRNA ligase activity [GO:0004820];protein dimerization activity [GO:0046983];transferase activity [GO:0016740]	+	96	96	96	76	76	76	81.943	0	323.31	185040000000	1647	6160600000	6526100000	5244700000	4765500000	7378000000	7560100000	6849400000	7042600000	7795100000	7002200000	8001200000	7940800000	6730300000	7488200000	7851600000	8166900000	8323900000	6132100000	7968200000	8933400000	10274000000	10728000000	9844100000	10328000000	69.8	68.7	71.1
+	2.2937	-0.870484	Q8H121	Q8H121	2721	At4g19880	Glutathione S-transferase family protein			glutathione transferase activity [GO:0004364]	+	35	35	28	81.7	81.7	75.3	40.575	0	323.31	70910000000	472	8371000000	8265100000	6664700000	6983900000	8506900000	8167300000	7768700000	7722700000	540170000	454170000	634400000	513950000	502170000	415330000	440590000	439930000	369030000	211830000	393500000	424910000	745070000	739420000	826560000	808230000	81.7	81.7	80.6
+	1.93002	-0.871991	A0A1I9LPJ2	A0A1I9LPJ2	42	CAM7	Calmodulin	calcium-mediated signaling [GO:0019722]		calcium ion binding [GO:0005509]	+	8	8	1	35.5	35.5	6.1	24.565	0	76.319	4104800000	90	96379000	90491000	99729000	104770000	77998000	190990000	106590000	85615000	263040000	252500000	380910000	290450000	108430000	91121000	126250000	93856000	262720000	105960000	202600000	276040000	206760000	198730000	177970000	214940000	30.4	30.4	20.6
+	2.99604	-0.877175	Q9ZVC3	Q9ZVC3	5986	At2g41380	At2g41380	methylation [GO:0032259];response to cadmium ion [GO:0046686]	mitochondrion [GO:0005739]	methyltransferase activity [GO:0008168]	+	25	25	25	71	71	71	30.557	0	317.79	14847000000	148	1348600000	1566100000	1179400000	1152700000	1981400000	2200600000	2260200000	2252100000	14660000	0	31370000	25783000	57654000	67887000	33507000	46305000	52021000	56128000	66373000	80959000	93962000	75197000	99285000	104820000	69.1	69.1	55.8
+	3.14505	-0.877548	P25856	P25856	1683	GAPA1	Glyceraldehyde-3-phosphate dehydrogenase GAPA1, chloroplastic	glucose metabolic process [GO:0006006];protein homotetramerization [GO:0051289];reductive pentose-phosphate cycle [GO:0019253];response to cold [GO:0009409];response to light stimulus [GO:0009416];response to sucrose [GO:0009744]	apoplast [GO:0048046];chloroplast [GO:0009507];chloroplast envelope [GO:0009941];chloroplast membrane [GO:0031969];chloroplast stroma [GO:0009570];chloroplast thylakoid membrane [GO:0009535];cytosol [GO:0005829];stromule [GO:0010319];supramolecular complex [GO:0099080]	disordered domain specific binding [GO:0097718];glyceraldehyde-3-phosphate dehydrogenase (NAD+) (phosphorylating) activity [GO:0004365];glyceraldehyde-3-phosphate dehydrogenase (NADP+) (phosphorylating) activity [GO:0047100];identical protein binding [GO:0042802];NAD binding [GO:0051287];NADP binding [GO:0050661];protein homodimerization activity [GO:0042803]	+	65	65	30	84.1	84.1	52.5	42.489	0	323.31	1798300000000	3535	315280000	297870000	237430000	166600000	330200000	543920000	235780000	266990000	115880000000	104660000000	126660000000	116940000000	95693000000	102790000000	98579000000	104980000000	74348000000	68905000000	79765000000	95676000000	154480000000	148040000000	153690000000	154810000000	32.6	32.8	32.6
+	2.9189	-0.879184	Q8L5Y6	Q8L5Y6	2772	CAND1	Cullin-associated NEDD8-dissociated protein 1	protein ubiquitination [GO:0016567];response to auxin [GO:0009733];SCF complex assembly [GO:0010265];vegetative to reproductive phase transition of meristem [GO:0010228];xylem and phloem pattern formation [GO:0010051]	cell wall [GO:0005618];cytosol [GO:0005829];nucleus [GO:0005634];plasma membrane [GO:0005886]		+	77	77	77	60.5	60.5	60.5	134.9	0	323.31	38231000000	558	4008500000	4264900000	2980300000	3083400000	4689700000	4757000000	4079500000	4607700000	411490000	326220000	392380000	351060000	260260000	376200000	343830000	269450000	167020000	161340000	213900000	208960000	555140000	569830000	649750000	503130000	55.5	54.2	52.3
+	1.71557	-0.880337	Q8RXE9	Q8RXE9	3033	OVA4	Tryptophan--tRNA ligase, chloroplastic/mitochondrial	tryptophanyl-tRNA aminoacylation [GO:0006436]	chloroplast [GO:0009507];cytosol [GO:0005829];mitochondrion [GO:0005739]	ATP binding [GO:0005524];tryptophan-tRNA ligase activity [GO:0004830]	+	20	20	20	47.1	47.1	47.1	45.3	0	205.26	15093000000	182	24959000	37008000	112680000	30234000	339230000	42308000	41316000	51833000	1150500000	1171000000	1521800000	1322900000	493610000	545140000	580970000	565720000	902120000	548990000	851200000	943610000	1008700000	873430000	937980000	995320000	13.5	9.6	4.9
+	2.18197	-0.883395	Q9MAA1	Q9MAA1	5104	At3g05180	GDSL esterase/lipase At3g05180	lipid catabolic process [GO:0016042];systemic acquired resistance [GO:0009627]	apoplast [GO:0048046]	hydrolase activity, acting on ester bonds [GO:0016788]	+	9	9	9	27.4	27.4	27.4	42.344	0	37.788	3181400000	79	28012000	80349000	32855000	51074000	0	112480000	43164000	44200000	153650000	125630000	124890000	144730000	131160000	188400000	123940000	189330000	118220000	118800000	135930000	139380000	257480000	290170000	249540000	297950000	4	6.3	4
+	1.53433	-0.883901	Q9SCX9	Q9SCX9	5243	DHAPRD	Glycerol-3-phosphate dehydrogenase [NAD(+)] 1, chloroplastic	carbohydrate metabolic process [GO:0005975];glycerol-3-phosphate catabolic process [GO:0046168];glycerol-3-phosphate metabolic process [GO:0006072];glycerophospholipid metabolic process [GO:0006650];NADH oxidation [GO:0006116];phospholipid biosynthetic process [GO:0008654]	chloroplast [GO:0009507];cytosol [GO:0005829];glycerol-3-phosphate dehydrogenase complex [GO:0009331]	glycerol-3-phosphate dehydrogenase [NAD+] activity [GO:0004367];NAD binding [GO:0051287];protein homodimerization activity [GO:0042803]	+	7	7	7	20	20	20	43.791	0	7.7691	939650000	24	112360000	105570000	73503000	46779000	103790000	157400000	107950000	164410000	0	0	0	6882000	0	3786100	4080200	0	0	0	0	0	6446700	14890000	16738000	15064000	17.8	17	14.8
+	1.36719	-0.884397	Q682Q6	Q682Q6	2429	At1g32520	TLDc domain protein		chloroplast [GO:0009507]		+	3	3	3	12.6	12.6	12.6	26.287	0	4.2902	654450000	24	10577000	0	0	0	0	0	0	0	30593000	44363000	41730000	35148000	20654000	30856000	19602000	36772000	30648000	17782000	28127000	40581000	70705000	75508000	62927000	57877000	5.4	0	0
+	1.93481	-0.884686	Q9M1X2	Q9M1X2	4992	FAP1	Fatty-acid-binding protein 1	fatty acid metabolic process [GO:0006631]	chloroplast [GO:0009507];chloroplast envelope [GO:0009941];chloroplast stroma [GO:0009570];cytosol [GO:0005829];mitochondrion [GO:0005739];plastid [GO:0009536]	fatty acid binding [GO:0005504];intramolecular lyase activity [GO:0016872]	+	21	21	21	55.9	55.9	55.9	30.394	0	133.53	13580000000	220	109570000	107150000	111530000	77633000	103010000	229450000	113860000	164190000	661790000	532220000	988850000	936990000	472350000	438340000	435400000	509160000	612270000	418710000	517330000	825500000	1153200000	1411000000	1130200000	1520100000	26.9	25.1	28.7
+	3.29865	-0.887279	Q9LSP5	Q9LSP5	4678	At3g17020	AT3g17020/K14A17_14	response to cold [GO:0009409]	cytosol [GO:0005829];plasma membrane [GO:0005886]	hydrolase activity [GO:0016787]	+	19	19	19	68.7	68.7	68.7	17.775	0	167.92	15790000000	198	1251900000	1321300000	927550000	967490000	1667500000	1841400000	1569800000	1805900000	215380000	205660000	301750000	264140000	265970000	342050000	276040000	264740000	105020000	126120000	94497000	136290000	469180000	473980000	399180000	497290000	67.5	68.7	66.9
+	4.6294	-0.888059	O81235	O81235	1524	MSD1	Superoxide dismutase [Mn] 1, mitochondrial	defense response to bacterium [GO:0042742];embryo development ending in seed dormancy [GO:0009793];response to zinc ion [GO:0010043]	cytosol [GO:0005829];mitochondrial matrix [GO:0005759];mitochondrion [GO:0005739]	copper ion binding [GO:0005507];manganese ion binding [GO:0030145];metal ion binding [GO:0046872];superoxide dismutase activity [GO:0004784]	+	22	22	22	74.9	74.9	74.9	25.444	0	323.31	44159000000	337	1879000000	1959400000	1526600000	1497200000	1861300000	1964800000	1878700000	1758400000	2105200000	2654000000	3173900000	2591400000	1113400000	1351500000	1443900000	1416500000	945940000	669920000	858520000	1289100000	2774000000	2372100000	2553600000	2521000000	64.1	64.1	64.5
+	2.89438	-0.891567	Q8VYC5	Q8VYC5	3118	At1g18270	Ketose-bisphosphate aldolase class-II family protein	carbohydrate metabolic process [GO:0005975]		aldehyde-lyase activity [GO:0016832];NAD binding [GO:0051287];NADP binding [GO:0050661];oxidoreductase activity [GO:0016491];zinc ion binding [GO:0008270]	+	109	109	109	69.8	69.8	69.8	147.04	0	323.31	71594000000	733	7391300000	7642400000	6243800000	5783200000	10087000000	11624000000	10057000000	10715000000	294240000	267260000	343430000	348190000	56492000	51554000	27949000	51297000	28992000	12280000	24392000	14791000	158230000	129510000	129340000	113130000	65.1	61.7	63
[truncated: 547 more rows]
[truncated: 43 more columns]
