# Supplementary material for: Proteome Dynamics of Persulfidation in Leaf Tissue under Light/Dark Conditions and Carbon Deprivation
Source: Antioxidants (Basel). 2023 Mar 23;12(4):789. doi: 10.3390/antiox12040789 (PMC10135009; doi:10.3390/antiox12040789)
Supplement: Supplementary file 1 [file antioxidants-12-00789-s001.zip › Dataset S7.xlsx]

## Sheet: ntools _at to AGI Converter Out
Dataset 7. Proteins only present or more persulfidated in leaf samples (S2) collected after 8 h dark photoperiod
AGI	Gene_alias	Annotation	Uniprot
ATCG00490	RBCL	RBCL__ribulose-bisphosphate carboxylases	RBL_ARATH
ATCG00120	ATPA	ATPA__ATP synthase subunit alpha	ATPA_ARATH
AT4G34090	PAB	PAB	F4JJY7_ARATHPAB_ARATHQ3E7I4_ARATH
AT5G49720	ATGH9A1DECIRX2KORKOR1RSW2TSD1	ATGH9A1_DEC_GH9A1_IRX2_KOR_KOR1_RSW2_TSD1__glycosyl hydrolase 9A1	GUN25_ARATH
AT3G09940	AtMDAR3	AtMDAR3_MDAR3__monodehydroascorbate reductase	B3H5M0_ARATHMDAR3_ARATH
AT5G57870	eIFiso4G1	eIFiso4G1__MIF4G domain-containing protein / MA3 domain-containing protein	IF4G1_ARATH
AT5G06670	Kin7.5	Kin7.5__P-loop containing nucleoside triphosphate hydrolases superfamily protein	KN7L_ARATH
AT1G34220	ISTL1	ISTL1__Regulator of Vps4 activity in the MVB pathway protein	F4HUX0_ARATHQ9XIC8_ARATH
AT4G24550	AP4M	AP4M__Clathrin adaptor complexes medium subunit family protein	AP4M_ARATHF4JQY9_ARATHF4JQZ0_ARATH
AT4G29840	MTO2TS	MTO2_TS__Pyridoxal-5'-phosphate-dependent enzyme family protein	THRC1_ARATH
AT2G33610	ATSWI3BCHB2	ATSWI3B_CHB2_SWI3B__switch subunit 3	SWI3B_ARATH
AT5G47650	ATNUDT2ATNUDX2	ATNUDT2_ATNUDX2_NUDT2__nudix hydrolase homolog 2	NUDT2_ARATH
AT1G48760	AP-3deltadelta-ADRPAT4	AP-3delta_delta-ADR_PAT4__delta-adaptin	AP3D_ARATH
AT5G38430	RBCS1B	RBCS1B__Ribulose bisphosphate carboxylase (small chain) family protein	RBS1B_ARATH
AT5G46790	PYL1RCAR12	PYL1_RCAR12__PYR1-like 1	PYL1_ARATH
AT5G38410	RBCS3B	RBCS3B__Ribulose bisphosphate carboxylase (small chain) family protein	B3H5S2_ARATHF4KA76_ARATHRBS3B_ARATH
AT1G31730	AP4E	AP4E__Adaptin family protein	AP4E_ARATH
AT4G20020	MORF1	MORF1	MORF1_ARATH
AT3G11400	ATEIF3G1	ATEIF3G1_EIF3G1__eukaryotic translation initiation factor 3G1	F4J6A1_ARATHQ9SSJ0_ARATH
AT2G45990			F4IH73_ARATHF4IH74_ARATHO82790_ARATH
AT5G42020	BIPBIP2	BIP_BIP2__Heat shock protein 70 (Hsp 70) family protein	BIP2_ARATHF4K007_ARATH
AT4G15545	NAIP1	NAIP1	Y4554_ARATH
AT4G21640		Subtilase family protein	SBT3F_ARATH
AT5G14740	BETA CA2CA18	BETA CA2_CA18_CA2__carbonic anhydrase 2	A8MQY4_ARATHBCA2_ARATHF4K873_ARATHF4K875_ARATH
AT5G28540	BIP1	BIP1__heat shock protein 70 (Hsp 70) family protein	BIP1_ARATH
AT1G13980	EMB30GNMIZ2VAN7	EMB30_GN_MIZ2_VAN7__sec7 domain-containing protein	GNOM_ARATH
AT4G08310			Q9SUE9_ARATH
AT1G67090	RBCS1A	RBCS1A__ribulose bisphosphate carboxylase small chain 1A	F4HRR5_ARATHRBS1A_ARATH
AT3G02530		TCP-1/cpn60 chaperonin family protein	TCPZA_ARATH
AT3G23620	ARPF2	ARPF2__Ribosomal RNA processing Brix domain protein	RPF2_ARATH
AT3G51830	ATG5SAC8	ATG5_SAC8__SAC domain-containing protein 8	F4J4J9_ARATHSAC8_ARATH
AT3G25690	AtCHUP1	AtCHUP1_CHUP1__Hydroxyproline-rich glycoprotein family protein	CHUP1_ARATHF4JA42_ARATH
AT4G34110	ATPAB2PABP2	ATPAB2_PAB2_PABP2__poly(A) binding protein 2	PABP2_ARATH
AT3G10250		Plant protein 1589 of unknown function	Q940M5_ARATH
AT1G48920	ATNUC-L1NUC1PARL1	ATNUC-L1_NUC-L1_NUC1_PARL1__nucleolin like 1	NUCL1_ARATH
AT3G55410		2-oxoglutarate dehydrogenase, E1 component	F4IWV2_ARATH
AT4G36210		Protein of unknown function (DUF726)	B3H797_ARATHF4JPN3_ARATHO65513_ARATH
AT1G21380		Target of Myb protein 1	TOL3_ARATH
AT1G68020	ATTPS6	ATTPS6_TPS6__UDP-Glycosyltransferase / trehalose-phosphatase family protein	TPS6_ARATH
AT1G79150	AtNOC3	AtNOC3_NOC3__binding	F4IDJ0_ARATH
AT1G59540	ZCF125	ZCF125__P-loop containing nucleoside triphosphate hydrolases superfamily protein	B3H7L9_ARATHKN7N_ARATH
AT2G26590	RPN13	RPN13__regulatory particle non-ATPase 13	RPN13_ARATH
AT3G15660	ATGRX4GRXS15	ATGRX4_GRX4_GRXS15__glutaredoxin 4	GRS15_ARATH
AT1G59870	ABCG36ATABCG36ATPDR8PEN3	ABCG36_ATABCG36_ATPDR8_PDR8_PEN3__ABC-2 and Plant PDR ABC-type transporter family protein	AB36G_ARATH
AT4G25130	MSRA4PMSR4	MSRA4_PMSR4__peptide met sulfoxide reductase 4	MSRA4_ARATH
AT1G51650		ATP synthase epsilon chain, mitochondrial	ATP5E_ARATH
AT2G04880	ATWRKY1ZAP1	ATWRKY1_WRKY1_ZAP1__zinc-dependent activator protein-1	WRKY1_ARATH
AT5G16730		Plant protein of unknown function (DUF827)	Y5673_ARATH
AT5G54760		Translation initiation factor SUI1 family protein	Q9FFV1_ARATH
AT4G27130		Translation initiation factor SUI1 family protein	SUI11_ARATH
AT3G62310		RNA helicase family protein	DEAH2_ARATH
AT5G60590		DHBP synthase RibB-like alpha/beta domain	F4K0E6_ARATHQ93W92_ARATH
AT4G27000	ATRBP45C	ATRBP45C__RNA-binding (RRM/RBD/RNP motifs) family protein	RP45C_ARATH
AT1G16820		vacuolar ATP synthase catalytic subunit-related / V-ATPase-related / vacuolar proton pump-related	F4I600_ARATHF4I601_ARATH
AT5G07300	BON2	BON2__Calcium-dependent phospholipid-binding Copine family protein	BON2_ARATH
AT1G08370	ATDCP1	ATDCP1_DCP1__decapping 1	DCP1_ARATH
AT4G28680	AtTYDCTYRDCTYRDC1	AtTYDC_TYDC_TYRDC_TYRDC1__L-tyrosine decarboxylase	A8MQJ1_ARATHF4JM08_ARATHF4JM09_ARATHTYDC2_ARATH
AT1G15750	TPLWSIP1	TPL_WSIP1__Transducin family protein / WD-40 repeat family protein	TPL_ARATH
AT4G20520		RNA binding;RNA-directed DNA polymerases	Q9SUM7_ARATH
AT3G55020		Ypt/Rab-GAP domain of gyp1p superfamily protein	F4JF82_ARATH
AT2G44650	CHL-CPN10	CHL-CPN10_CPN10__chloroplast chaperonin 10	CH102_ARATH
AT5G42990	UBC18	UBC18__ubiquitin-conjugating enzyme 18	UBC18_ARATH
AT1G80670	RAE1	RAE1__Transducin/WD40 repeat-like superfamily protein	RAE1_ARATH
AT4G27740		Yippee family putative zinc-binding protein	YIPL5_ARATH
AT2G34630	GPPSGPS1	GPPS_GPS1__geranyl diphosphate synthase 1	SPS3_ARATH
AT5G44635	MCM6	MCM6__minichromosome maintenance (MCM2/3/5) family protein	MCM6_ARATH
AT3G22380	TIC	TIC__time for coffee	B3H7F6_ARATHTIC_ARATH
AT4G17300	ATNS1OVA8	ATNS1_NS1_OVA8__Class II aminoacyl-tRNA and biotin synthetases superfamily protein	SYNO_ARATH
AT4G39820		Tetratricopeptide repeat (TPR)-like superfamily protein	Q5XF35_ARATH
AT3G20050	ATTCP-1	ATTCP-1_TCP-1__T-complex protein 1 alpha subunit	TCPA_ARATH
AT3G02770		Ribonuclease E inhibitor RraA/Dimethylmenaquinone methyltransferase	RRAA1_ARATH
AT1G66750	AT;CDKD;2CAK4CAK4ATCDKD1;2	AT;CDKD;2_CAK4_CAK4AT_CDKD1;2_CDKD;2__CDK-activating kinase 4	CDKD2_ARATH
AT5G22510	A/N-InvEAt-A/N-InvEINV-E	A/N-InvE_At-A/N-InvE_INV-E__alkaline/neutral invertase	INVE_ARATH
AT5G51550	EXL3	EXL3__EXORDIUM like 3	EXOL3_ARATH
AT4G13930	SHM4	SHM4__serine hydroxymethyltransferase 4	GLYC4_ARATH
AT4G30610	BRS1SCPL24	BRS1_SCPL24__alpha/beta-Hydrolases superfamily protein	SCP24_ARATH
AT1G09080	BIP3	BIP3__Heat shock protein 70 (Hsp 70) family protein	BIP3_ARATH
AT1G75690	LQY1	LQY1__DnaJ/Hsp40 cysteine-rich domain superfamily protein	LQY1_ARATH
AT2G39730	RCA	RCA__rubisco activase	F4IVZ7_ARATHRCA_ARATH
AT1G15130		Endosomal targeting BRO1-like domain-containing protein	BRO1_ARATH
AT1G11720	ATSS3	ATSS3_SS3__starch synthase 3	F4IAG1_ARATHSSY3_ARATH
AT1G29320		Transducin/WD40 repeat-like superfamily protein	Q0V856_ARATH
AT3G15840	PIFI	PIFI__post-illumination chlorophyll fluorescence increase	B3H4M0_ARATHF4J034_ARATHF4J036_ARATHF4J037_ARATHQ9LVZ5_ARATH
AT2G47960			O82263_ARATH
AT1G43670	AtcFBPcyfbpFINS1	AtcFBP_cyfbp_FBP_FINS1__Inositol monophosphatase family protein	F16P2_ARATH
AT5G08680		ATP synthase alpha/beta family protein	ATPBO_ARATH
AT3G07570		Cytochrome b561/ferric reductase transmembrane with DOMON related domain	B561K_ARATH
AT3G28730	ATHMGNFDSSRP1	ATHMG_HMG_NFD_SSRP1__high mobility group	SSRP1_ARATH
AT1G16720	HCF173	HCF173__high chlorophyll fluorescence phenotype 173	HC173_ARATH
AT1G60200	RBM25	RBM25__splicing factor PWI domain-containing protein / RNA recognition motif (RRM)-containing protein	Q8VY15_ARATH
AT1G07940		GTP binding Elongation factor Tu family protein	EF1A1_ARATH
AT1G35550		elongation factor Tu C-terminal domain-containing protein	Q6NLF6_ARATH
AT3G13530	MAP3KE1MAPKKK7	MAP3KE1_MAPKKK7__mitogen-activated protein kinase kinase kinase 7	M3KE1_ARATH
AT1G24510		TCP-1/cpn60 chaperonin family protein	TCPE_ARATH
AT2G16005	ROSY1	ROSY1__MD-2-related lipid recognition domain-containing protein	ROSY1_ARATH
AT1G34430	EMB3003	EMB3003__2-oxoacid dehydrogenases acyltransferase family protein	ODP25_ARATH
AT5G36170	ATPRFBHCF109	ATPRFB_HCF109__high chlorophyll fluorescent 109	F4K2X9_ARATHPRFB1_ARATH
AT3G16530		Legume lectin family protein	LECT5_ARATH
AT2G06050	AtOPR3DDE1	AtOPR3_DDE1_OPR3__oxophytodienoate-reductase 3	OPR3_ARATH
AT1G62600		Flavin-binding monooxygenase family protein	GSXL4_ARATH
AT4G19840	AN5ATPP2-A1ATPP2A-1	AN5_ATPP2-A1_ATPP2A-1_PP2-A1__phloem protein 2-A1	P2A01_ARATH
AT2G01755			Q570J5_ARATH
AT1G06950	ATTIC110	ATTIC110_TIC110__translocon at the inner envelope membrane of chloroplasts 110	TI110_ARATH
AT2G18110		Translation elongation factor EF1B/ribosomal protein S6 family protein	EF1D2_ARATH
AT2G32080	PUR ALPHA-1	PUR ALPHA-1__purin-rich alpha 1	PUR_ARATH
AT5G28840	GME	GME__GDP-D-mannose 3',5'-epimerase	GME_ARATH
AT1G64770	NDF2NDH45PnsB2	NDF2_NDH45_PnsB2__NDH-dependent cyclic electron flow 1	F4I890_ARATHF4I891_ARATHPNSB2_ARATH
AT5G43830		Aluminium induced protein with YGL and LRDR motifs	Q9FG81_ARATH
AT3G61240	RH12	RH12__DEA(D/H)-box RNA helicase family protein	RH12_ARATH
AT4G24520	AR1AtCPR1ATR1	AR1_AtCPR1_ATR1__P450 reductase 1	F4JQY4_ARATHNCPR1_ARATH
AT1G68590	PSRP3/1	PSRP3/1__Ribosomal protein PSRP-3/Ycf65	A8MQL0_ARATHRRP31_ARATH
AT3G55610	P5CS2	P5CS2__delta 1-pyrroline-5-carboxylate synthase 2	B3H5E3_ARATHP5CS2_ARATH
AT5G04430	BTR1BTR1LBTR1S	BTR1_BTR1L_BTR1S__binding to TOMV RNA 1L (long form)	BTR1_ARATH
AT1G67230	AtLINC1CRWN1KAKU2	AtLINC1_CRWN1_KAKU2_LINC1__little nuclei1	CRWN1_ARATH
AT1G76030	AtVAB1	AtVAB1_VAB1__ATPase, V1 complex, subunit B protein	VATB1_ARATH
AT1G26110	DCP5	DCP5__decapping 5	DCP5_ARATH
AT3G18580	SSB2	SSB2__Nucleic acid-binding, OB-fold-like protein	Q9LII1_ARATH
AT1G35160	14-3-3PHIGF14 PHIGRF4	14-3-3PHI_GF14 PHI_GRF4__GF14 protein phi chain	14334_ARATHF4HWQ5_ARATH
AT1G11650	ATRBP45B	ATRBP45B_RBP45B__RNA-binding (RRM/RBD/RNP motifs) family protein	RB45B_ARATH
AT5G02450		Ribosomal protein L36e family protein	RL363_ARATH
AT2G36390	BE3SBE2.1	BE3_SBE2.1__starch branching enzyme 2.1	GLGB1_ARATH
AT1G61940	AtTLP4	AtTLP4_TLP4__tubby like protein 4	TLP4_ARATH
AT3G15000	MORF8RIP1	MORF8_RIP1__cobalt ion binding	MORF8_ARATH
AT1G53260			A8MS36_ARATHQ58G44_ARATH
AT4G30990		ARM repeat superfamily protein	F4JR52_ARATHF4JR53_ARATH
AT4G33250	ATTIF3K1EIF3K	ATTIF3K1_EIF3K_TIF3K1__eukaryotic translation initiation factor 3K	EIF3K_ARATH
AT1G03900	ABCI18ATNAP4	ABCI18_ATNAP4_NAP4__non-intrinsic ABC protein 4	Y1390_ARATH
AT4G32760		ENTH/VHS/GAT family protein	F4JV51_ARATHTOL9_ARATH
AT4G23650	AtCDPK6CPK3	AtCDPK6_CDPK6_CPK3__calcium-dependent protein kinase 6	CDPK3_ARATH
AT5G47210		Hyaluronan / mRNA binding family	RGGC_ARATH
AT3G09440		Heat shock protein 70 (Hsp 70) family protein	HSP7C_ARATH
AT1G12840	ATVHA-CDET3	ATVHA-C_DET3__vacuolar ATP synthase subunit C (VATC) / V-ATPase C subunit / vacuolar proton pump C subunit (DET3)	VATC_ARATH
AT3G60750	AtTKL1	AtTKL1_TKL1__Transketolase	F4JBY2_ARATHTKTC1_ARATH
AT2G22450	AtRIBA2	AtRIBA2_RIBA2__riboflavin biosynthesis protein, putative	RIBA2_ARATH
AT1G05520	AtSEC23B	AtSEC23B__Sec23/Sec24 protein transport family protein	Q8H0S3_ARATH
AT1G32160		Protein of unknown function (DUF760)	Q9FVR1_ARATH
AT3G04720	AtPR4HELPR-4	AtPR4_HEL_PR-4_PR4__pathogenesis-related 4	HEVL_ARATH
AT3G50500	SNRK2-2SPK-2-2SRK2D	SNRK2-2_SNRK2.2_SPK-2-2_SRK2D__SNF1-related protein kinase 2.2	F4J0N1_ARATHSRK2D_ARATH
AT2G17390	AKR2B	AKR2B__ankyrin repeat-containing 2B	AKR2B_ARATH
AT2G39700	ATEXP4ATEXPA4ATHEXP ALPHA 1.6	ATEXP4_ATEXPA4_ATHEXP ALPHA 1.6_EXPA4_XPA4__expansin A4	EXPA4_ARATH
AT1G78300	14-3-3OMEGAGF14 OMEGAGRF2	14-3-3OMEGA_GF14 OMEGA_GRF2__general regulatory factor 2	14332_ARATH
AT5G47200	ATRAB1AATRABD2B	ATRAB1A_ATRABD2B_RAB1A__RAB GTPase homolog 1A	RAD2B_ARATH
AT2G35490		Plastid-lipid associated protein PAP / fibrillin family protein	PAP3_ARATH
AT4G03080	BSL1	BSL1__BRI1 suppressor 1 (BSU1)-like 1	BSL1_ARATH
AT2G17200	DSK2DSK2b	DSK2_DSK2b__ubiquitin family protein	DSK2B_ARATH
AT5G18670	BAM9BMY3	BAM9_BMY3__beta-amylase 3	BAM9_ARATH
AT1G14410	ATWHY1PTAC1	ATWHY1_PTAC1_WHY1__ssDNA-binding transcriptional regulator	WHY1_ARATH
AT5G07470	ATMSRA3PMSR3	ATMSRA3_PMSR3__peptidemethionine sulfoxide reductase 3	MSRA3_ARATH
AT4G12420	SKU5	SKU5__Cupredoxin superfamily protein	SKU5_ARATH
AT2G23200		Protein kinase superfamily protein	Y2232_ARATH
AT2G23350	PAB4PABP4	PAB4_PABP4__poly(A) binding protein 4	PABP4_ARATH
AT5G27640	ATEIF3B-1ATTIF3B1	ATEIF3B-1_ATTIF3B1_EIF3B_EIF3B-1_TIF3B1__translation initiation factor 3B1	EIF3B_ARATHF4K4D5_ARATH
AT1G64550	ABCF3AtABCF3AtGCN20ATGCN3SCORD5	ABCF3_AtABCF3_AtGCN20_ATGCN3_GCN20_GCN3_SCORD5__general control non-repressible 3	AB3F_ARATH
AT5G16400	ATF2TRXF2	ATF2_TRXF2__thioredoxin F2	TRXF2_ARATH
AT3G13800		Metallo-hydrolase/oxidoreductase superfamily protein	F4JEJ3_ARATHQ570G3_ARATH
AT5G54900	ATRBP45A	ATRBP45A_RBP45A__RNA-binding protein 45A	RB45A_ARATH
AT1G20970			F4HWC3_ARATH
AT1G14650		SWAP (Suppressor-of-White-APricot)/surp domain-containing protein / ubiquitin family protein	SF3A1_ARATH
AT2G03390		uvrB/uvrC motif-containing protein	CLPF_ARATH
AT1G51760	IAR3JR3	IAR3_JR3__peptidase M20/M25/M40 family protein	ILL4_ARATH
AT5G22120			Q9C576_ARATH
AT3G18860		transducin family protein / WD-40 repeat family protein	F4J9W8_ARATHQ9LHN3_ARATH
AT1G78260		RNA-binding (RRM/RBD/RNP motifs) family protein	Q0WR30_ARATHQ8LF90_ARATH
AT3G18210	CP2	CP2__2-oxoglutarate (2OG) and Fe(II)-dependent oxygenase superfamily protein	Q9LV19_ARATH
AT5G51350	MOL1	MOL1__Leucine-rich repeat transmembrane protein kinase family protein	Q9FGN6_ARATH
AT2G43090	IPMI SSU1	IPMI SSU1__Aconitase/3-isopropylmalate dehydratase protein	F4IQ61_ARATHLEUD3_ARATH
AT5G58140	AtPHOT2NPL1	AtPHOT2_NPL1_PHOT2__phototropin 2	A8MS49_ARATHF4KDJ3_ARATHPHOT2_ARATH
AT1G67980	CCOAMT	CCOAMT__caffeoyl-CoA 3-O-methyltransferase	CAMT1_ARATHF4HVJ6_ARATH
AT4G12720	AtNUDT7GFG1	AtNUDT7_GFG1_NUDT7__MutT/nudix family protein	F4JRE7_ARATHNUDT7_ARATH
AT4G37130	NUP58TCU1	NUP58_TCU1__hydroxyproline-rich glycoprotein family protein	NUP58_ARATH
AT3G57890		Tubulin binding cofactor C domain-containing protein	F4J4K6_ARATHQ940S9_ARATH
AT1G18070		Translation elongation factor EF1A/initiation factor IF2gamma family protein	Q8L835_ARATHQ9LMS7_ARATH
AT1G57770		FAD/NAD(P)-binding oxidoreductase family protein	Q9FVR9_ARATH
AT3G04550	RAF1	RAF1	RAF2_ARATH
AT5G52520	AtProRS-OrgOVA6PRORS1	AtProRS-Org_OVA6_ProRS-Org_PRORS1__Class II aaRS and biotin synthetases superfamily protein	SYPM_ARATH
AT1G72730		DEA(D/H)-box RNA helicase family protein	IF4A3_ARATH
AT2G31170	FIONASYCO ARATH	FIONA_SYCO ARATH__Cysteinyl-tRNA synthetase, class Ia family protein	F4IQQ3_ARATHSYCM_ARATH
AT4G28360		Ribosomal protein L22p/L17e family protein	Q8LDU0_ARATH
AT5G20920	eIF-2bsEIF2 BETAEMB1401	eIF-2bs_EIF2 BETA_EMB1401__eukaryotic translation initiation factor 2 beta subunit	IF2B_ARATH
AT2G21060	ATCSP4ATGRP2B	ATCSP4_ATGRP2B_GRP2B__glycine-rich protein 2B	CSP4_ARATH
AT2G30105			Y2010_ARATH
AT4G36360	BGAL3	BGAL3__beta-galactosidase 3	BGAL3_ARATH
AT3G22890	APS1ATPS1	APS1_ATPS1__ATP sulfurylase 1	APS1_ARATH
AT2G47470	ATPDI11ATPDIL2-1MEE30UNE5	ATPDI11_ATPDIL2-1_MEE30_PDI11_UNE5__thioredoxin family protein	A8MSC5_ARATHF4IL52_ARATHF4IL53_ARATHPDI21_ARATH
AT1G12410	CLP2CLPR2EMB3146NCLPP2	CLP2_CLPR2_EMB3146_NCLPP2__CLP protease proteolytic subunit 2	CLPR2_ARATH
AT5G40890	ATCLC-AATCLCA	ATCLC-A_ATCLCA_CLC-A_CLC-A_CLCA__chloride channel A	CLCA_ARATHF4KIT3_ARATH
AT1G25220	ASB1TRP4WEI7	ASB1_TRP4_WEI7__anthranilate synthase beta subunit 1	ASB1_ARATHF4IAW5_ARATH
AT4G37925	NDH-MNdhM	NDH-M_NdhM__subunit NDH-M of NAD(P)H:plastoquinone dehydrogenase complex	NDHM_ARATH
AT3G14210	ESM1	ESM1__epithiospecifier modifier 1	ESM1_ARATH
AT4G01370	ATMPK4MAPK4	ATMPK4_MAPK4_MPK4__MAP kinase 4	MPK4_ARATH
AT1G17220	FUG1	FUG1__Translation initiation factor 2, small GTP-binding protein	IF2C_ARATH
AT5G22630	ADT5	ADT5__arogenate dehydratase 5	AROD5_ARATH
AT4G38510	AtVAB2	AtVAB2_VAB2__ATPase, V1 complex, subunit B protein	F4JTQ0_ARATHVATB2_ARATH
AT5G58290	RPT3	RPT3__regulatory particle triple-A ATPase 3	PRS6B_ARATH
AT1G23310	AOAT1GGAT1GGT1	AOAT1_GGAT1_GGT1__glutamate:glyoxylate aminotransferase	GGT1_ARATH
AT5G06160	ATO	ATO__splicing factor-related	ATO_ARATH
AT4G29060	emb2726	emb2726__elongation factor Ts family protein	PETS_ARATH
AT5G58710	ROC7	ROC7__rotamase CYP 7	CP20A_ARATH
AT1G18500	IPMS1MAML-4	IPMS1_MAML-4__methylthioalkylmalate synthase-like 4	LEU11_ARATH
AT1G27385			A8MQS1_ARATHF4HSW0_ARATHF4HSW1_ARATHQ9FZJ7_ARATH
AT3G25860	LTA2PLE2	LTA2_PLE2__2-oxoacid dehydrogenases acyltransferase family protein	ODP24_ARATH
AT1G11750	CLPP6NCLPP1NCLPP6	CLPP6_NCLPP1_NCLPP6__CLP protease proteolytic subunit 6	CLPP6_ARATHF4IAG5_ARATH
AT3G18190		TCP-1/cpn60 chaperonin family protein	TCPD_ARATH
AT1G66680	AR401	AR401__S-adenosyl-L-methionine-dependent methyltransferases superfamily protein	Q9C9M1_ARATH
AT3G03980		NAD(P)-binding Rossmann-fold superfamily protein	ADRC3_ARATH
AT4G23170	CRK9EP1	CRK9_EP1__receptor-like protein kinase-related family protein	CRK9_ARATH
AT1G29690	CAD1NSL2	CAD1_NSL2__MAC/Perforin domain-containing protein	CAD1_ARATH
AT5G64300	ATGCHATRIBA1RFD1	ATGCH_ATRIBA1_GCH_RFD1_RIBA1__GTP cyclohydrolase II	RIBA1_ARATH
AT1G48030	mtLPD1	mtLPD1__mitochondrial lipoamide dehydrogenase 1	DLDH1_ARATH
AT5G30510	ARRPS1PRPS1	ARRPS1_PRPS1_RPS1__ribosomal protein S1	RPS1_ARATH
AT1G06560	AtTRM4fNOP2C	AtTRM4f_NOP2C_TRM4f__NOL1/NOP2/sun family protein	NOP2C_ARATH
AT2G27710		60S acidic ribosomal protein family	F4IGR3_ARATHRLA22_ARATH
AT1G72370	AP40RP40RPSAA	AP40_P40_RP40_RPSAA__40s ribosomal protein SA	B9DG17_ARATHRSSA1_ARATH
AT1G52380		NUP50 (Nucleoporin 50 kDa) protein	NU50A_ARATH
AT2G21280	ATSULAGC1	ATSULA_GC1_SULA__NAD(P)-binding Rossmann-fold superfamily protein	GC1_ARATH
AT1G05010	ACO4EAT1EFE	ACO4_EAT1_EFE__ethylene-forming enzyme	ACCO4_ARATH
AT5G13280	AKAK-LYS1AK1	AK_AK-LYS1_AK1__aspartate kinase 1	AK1_ARATH
AT2G30870	ATGSTF10ATGSTF4ERD13	ATGSTF10_ATGSTF4_ERD13_GSTF10__glutathione S-transferase PHI 10	GSTFA_ARATH
AT4G32330	WDL5	WDL5__TPX2 (targeting protein for Xklp2) protein family	WDL5_ARATH
AT1G65930	cICDH	cICDH__cytosolic NADP+-dependent isocitrate dehydrogenase	ICDHC_ARATH
AT3G16270		ENTH/VHS family protein	MTV1_ARATH
AT5G55530		Calcium-dependent lipid-binding (CaLB domain) family protein	Q5HZ03_ARATH
AT4G24930		thylakoid lumenal 17.9 kDa protein, chloroplast	TL1Y_ARATH
AT5G49030	OVA2	OVA2__tRNA synthetase class I (I, L, M and V) family protein	F4K4Q2_ARATHSYIM_ARATH
AT1G32200	ACT1ATS1	ACT1_ATS1__phospholipid/glycerol acyltransferase family protein	PLSB_ARATH
AT5G13560			Q8GY46_ARATH
AT3G13490	ATKRS-2OVA5	ATKRS-2_OVA5__Lysyl-tRNA synthetase, class II	SYKM_ARATH
AT5G24780	ATVSP1	ATVSP1_VSP1__vegetative storage protein 1	B3H5J6_ARATHVSP1_ARATH
AT2G26930	ATCDPMEKCMEKCMKISPEPDE277	ATCDPMEK_CDPMEK_CMEK_CMK_ISPE_PDE277__4-(cytidine 5'-phospho)-2-C-methyl-D-erithritol kinase	ISPE_ARATH
AT3G60740	CHOEMB133TFC DTTN1	CHO_EMB133_TFC D_TTN1__ARM repeat superfamily protein	TBCD_ARATH
AT1G63660		GMP synthase (glutamine-hydrolyzing), putative / glutamine amidotransferase, putative	F4I3P5_ARATHQ9CAD1_ARATH
AT5G28850		Calcium-binding EF-hand family protein	2AB2B_ARATH
AT3G27380	SDH2-1	SDH2-1__succinate dehydrogenase 2-1	SDHB1_ARATH
AT5G46750	AGD9	AGD9__ARF-GAP domain 9	AGD9_ARATH
AT4G34490	ATCAP1CAP 1	ATCAP1_CAP 1_CAP1__cyclase associated protein 1	ACAP1_ARATH
AT5G41040	ASFTHHTRWP1	ASFT_HHT_RWP1__HXXXD-type acyl-transferase family protein	F4JWW6_ARATHHHT1_ARATH
AT4G32070	Phox4	Phox4__Octicosapeptide/Phox/Bem1p (PB1) domain-containing protein / tetratricopeptide repeat (TPR)-containing protein	PHOX4_ARATH
AT3G20630	ATUBP14DA3PER1TTN6	ATUBP14_DA3_PER1_TTN6_UBP14__ubiquitin-specific protease 14	UBP14_ARATH
AT3G13920	EIF4A1RH4TIF4A1	EIF4A1_RH4_TIF4A1__eukaryotic translation initiation factor 4A1	A8MRZ7_ARATHF4JEL4_ARATHF4JEL5_ARATHIF4A1_ARATH
AT5G20890		TCP-1/cpn60 chaperonin family protein	TCPB_ARATH
AT5G49910	cpHsc70-2HSC70-7	cpHsc70-2_HSC70-7__chloroplast heat shock protein 70-2	HSP7G_ARATH
AT5G37190	CIP4	CIP4__COP1-interacting protein 4	Q9FHU3_ARATH
AT1G14250		GDA1/CD39 nucleoside phosphatase family protein	APY5_ARATH
AT3G11830		TCP-1/cpn60 chaperonin family protein	TCPH_ARATH
AT5G06290	2-Cys Prx B2CPB	2-Cys Prx B_2CPB__2-cysteine peroxiredoxin B	BAS1B_ARATH
AT2G45810	RH6	RH6__DEA(D/H)-box RNA helicase family protein	RH6_ARATH
AT3G03960		TCP-1/cpn60 chaperonin family protein	TCPQ_ARATH
AT5G16050	GF14 UPSILONGRF5	GF14 UPSILON_GRF5__general regulatory factor 5	14335_ARATH
AT4G25450	ABCB28ATNAP8	ABCB28_ATNAP8_NAP8__non-intrinsic ABC protein 8	AB28B_ARATHF4JSM3_ARATH
AT4G09650	ATPDPDE332	ATPD_PDE332__ATP synthase delta-subunit gene	ATPD_ARATH
AT2G17760		Eukaryotic aspartyl protease family protein	APF1_ARATH
AT4G24280	cpHsc70-1	cpHsc70-1__chloroplast heat shock protein 70-1	HSP7F_ARATH
AT4G03520	ATHM2TRXm2	ATHM2_TRXm2__Thioredoxin superfamily proteinATHM2_TRXm2__Thioredoxin superfamily protein	F4JG94_ARATHTRXM2_ARATH F4JG94_ARATHTRXM2_ARATH
AT4G03520	ATHM2TRXm2	ATHM2_TRXm2__Thioredoxin superfamily proteinATHM2_TRXm2__Thioredoxin superfamily protein	F4JG94_ARATHTRXM2_ARATH F4JG94_ARATHTRXM2_ARATH
AT2G22360	DJA6	DJA6__DNAJ heat shock family protein	DNJA6_ARATH
AT1G79930	AtHsp70-14HSP91	AtHsp70-14_HSP91__heat shock protein 91	HSP7O_ARATH
AT3G01440	PnsL3PQL1PQL2	PnsL3_PQL1_PQL2__PsbQ-like 1	PNSL3_ARATH
AT4G11010	NDPK3	NDPK3__nucleoside diphosphate kinase 3	NDK3_ARATH
AT3G01500	ATBCA1ATSABP3	ATBCA1_ATSABP3_CA1_SABP3__carbonic anhydrase 1	BCA1_ARATH
AT2G04030	AtHsp90.5AtHsp90CCR88EMB1956Hsp88.1HSP90.5	AtHsp90.5_AtHsp90C_CR88_EMB1956_Hsp88.1_HSP90.5__Chaperone protein htpG family protein	HS905_ARATH
AT3G47650	BDS2	BDS2__DnaJ/Hsp40 cysteine-rich domain superfamily protein	BSD2_ARATH
AT2G38760	ANN3ANNAT3AtANN3	ANN3_ANNAT3_AtANN3__annexin 3	ANXD3_ARATH
AT5G26360		TCP-1/cpn60 chaperonin family protein	TCPG_ARATH
AT3G15356		Legume lectin family protein	LECT2_ARATH
AT5G38990	MDS1	MDS1__Malectin/receptor-like protein kinase family protein	Y5389_ARATH
AT4G32770	ATSDX1VTE1	ATSDX1_VTE1__tocopherol cyclase, chloroplast / vitamin E deficient 1 (VTE1) / sucrose export defective 1 (SXD1)	TOCC_ARATH
AT1G26460		Tetratricopeptide repeat (TPR)-like superfamily protein	PPR58_ARATH
AT1G78900	VHA-A	VHA-A__vacuolar ATP synthase subunit A	VATA_ARATH
AT1G24190	ATSIN3SNL3	ATSIN3_SIN3_SNL3__SIN3-like 3	F4I962_ARATHSNL3_ARATH
AT1G51510	Y14	Y14__RNA-binding (RRM/RBD/RNP motifs) family protein	Y14_ARATH
AT1G04510	MAC3A	MAC3A__MOS4-associated complex 3A	F4I5P3_ARATHPR19A_ARATH
AT2G37220		RNA-binding (RRM/RBD/RNP motifs) family protein	CP29B_ARATH
AT4G03280	PETCPGR1	PETC_PGR1__photosynthetic electron transfer C	UCRIA_ARATH
AT2G04700	FTRBINAP1	FTRB_INAP1__ferredoxin thioredoxin reductase catalytic beta chain family protein	FTRC_ARATH
AT1G56340	AtCRT1a	AtCRT1a_CRT1_CRT1a__calreticulin 1a	CALR1_ARATHF4I529_ARATH
AT3G58610		ketol-acid reductoisomerase	ILV5_ARATH
AT5G16450		Ribonuclease E inhibitor RraA/Dimethylmenaquinone methyltransferase	RRAA2_ARATH
AT2G34680	AIR9	AIR9__Outer arm dynein light chain 1 protein	AIR9_ARATH
AT5G11710		ENTH/VHS family protein	EPN1_ARATH
AT5G61780	AtTudor2TSN2	AtTudor2_TSN2_Tudor2__TUDOR-SN protein 2	TSN2_ARATH
AT3G01640	ATGLCAK	ATGLCAK_GLCAK__glucuronokinase G	GLAK1_ARATH
AT1G18440		Peptidyl-tRNA hydrolase family protein	PTHC_ARATH
AT1G56070	LOS1	LOS1__Ribosomal protein S5/Elongation factor G/III/V family protein	EF2_ARATH
AT2G36070	ATTIM44-2	ATTIM44-2_TIM44-2__translocase inner membrane subunit 44-2	TI442_ARATH
AT2G20510	ATTIM44-1	ATTIM44-1_TIM44-1__translocase inner membrane subunit 44-1	TI441_ARATH
AT2G38700	AtMDD1ATMVD1	AtMDD1_ATMVD1_MDD1_MVD1__mevalonate diphosphate decarboxylase 1	MVD1_ARATH
AT3G49180	RID3	RID3__Transducin/WD40 repeat-like superfamily protein	RID3_ARATH
AT4G03110	AtBRN1AtRBP-DR1	AtBRN1_AtRBP-DR1_BRN1_RBP-DR1__RNA-binding protein-defense related 1	BRN1L_ARATH
AT3G53460	CP29	CP29__chloroplast RNA-binding protein 29	CP29A_ARATHF4JAF3_ARATH
AT1G27430		GYF domain-containing protein	F4HSW8_ARATH
AT3G57000		nucleolar essential protein-related	Q9M1J8_ARATH
AT3G28220		TRAF-like family protein	Q9LHA6_ARATH
AT2G03640		Nuclear transport factor 2 (NTF2) family protein with RNA binding (RRM-RBD-RNP motifs) domain	F4IT98_ARATHQ8GW56_ARATHQ9ZPR2_ARATH
AT2G44490	BGLU26PEN2	BGLU26_PEN2__Glycosyl hydrolase superfamily protein	BGL26_ARATH
AT4G30530	GGP1	GGP1__Class I glutamine amidotransferase-like superfamily protein	GGP1_ARATH
AT3G01910	AT-SOAtSOSOX	AT-SO_AtSO_SOX__sulfite oxidase	A8MRF8_ARATHF4JBZ5_ARATHSUOX_ARATH
AT5G54810	ATTSB1TRP2TRPB	ATTSB1_TRP2_TRPB_TSB1__tryptophan synthase beta-subunit 1	TRPB1_ARATH
AT2G40590		Ribosomal protein S26e family protein	RS261_ARATH
AT2G21860		violaxanthin de-epoxidase-related	Q9SJ13_ARATH
AT5G66760	SDH1-1	SDH1-1__succinate dehydrogenase 1-1	SDHA1_ARATH
AT3G48730	GSA2GSAM	GSA2_GSAM__glutamate-1-semialdehyde 2,1-aminomutase 2	GSA2_ARATH
ATCG00480	AthCF1betaATPB	AthCF1beta_ATPB_CF1beta_PB__ATP synthase subunit beta	ATPB_ARATH
AT1G33590		Leucine-rich repeat (LRR) family protein	F4HR88_ARATH
AT2G26380		Leucine-rich repeat (LRR) family protein	O48705_ARATH
AT1G09210	AtCRT1bCRT2	AtCRT1b_CRT1b_CRT2__calreticulin 1b	CALR2_ARATH
AT1G10700	PRS3	PRS3__phosphoribosyl pyrophosphate (PRPP) synthase 3	KPRS3_ARATH
AT3G55220	AtSAP130b	AtSAP130b_SAP130b__Cleavage and polyadenylation specificity factor (CPSF) A subunit protein	S130B_ARATH
AT2G31810	AHASS1AIP1	AHASS1_AIP1__ACT domain-containing small subunit of acetolactate synthase protein	ILVH2_ARATH
AT4G28780		GDSL-like Lipase/Acylhydrolase superfamily protein	GDL67_ARATH
AT1G09780	iPGAM1	iPGAM1__Phosphoglycerate mutase, 2,3-bisphosphoglycerate-independent	PMG1_ARATH
AT4G37930	SHM1SHMT1STM	SHM1_SHMT1_STM__serine transhydroxymethyltransferase 1	GLYM1_ARATH
AT5G47030		ATPase, F1 complex, delta/epsilon subunit	ATP4_ARATH
AT4G19610		nucleotide binding;nucleic acid binding;RNA binding	F4JT92_ARATH
AT5G16590	LRR1	LRR1__Leucine-rich repeat protein kinase family protein	Y5659_ARATH
AT4G21990	APR3ATAPR3PRH-26PRH26	APR3_ATAPR3_PRH-26_PRH26__APS reductase 3	APR3_ARATHF4JKD5_ARATH
AT4G37910	mtHsc70-1	mtHsc70-1__mitochondrial heat shock protein 70-1	HSP7I_ARATH
AT3G18080	BGLU44	BGLU44__B-S glucosidase 44	BGL44_ARATH
AT3G18070	BGLU43	BGLU43__beta glucosidase 43	BGL43_ARATH
AT4G34120	CBSX2CDCP1LEJ1	CBSX2_CDCP1_LEJ1__Cystathionine beta-synthase (CBS) family protein	CBSX2_ARATH
AT5G07350	AtTudor1TSN1	AtTudor1_TSN1_Tudor1__TUDOR-SN protein 1	TSN1_ARATH
AT5G47770	FPS1	FPS1__farnesyl diphosphate synthase 1	FPPS1_ARATH
AT2G33040	ATP3	ATP3__gamma subunit of Mt ATP synthase	ATPG3_ARATH
AT4G35850		Pentatricopeptide repeat (PPR) superfamily protein	PP351_ARATH
AT5G02500	AT-HSC70-1AtHsp70-1HSP70-1	AT-HSC70-1_AtHsp70-1_HSC70_HSC70-1_HSP70-1__heat shock cognate protein 70-1AT-HSC70-1_AtHsp70-1_HSC70_HSC70-1_HSP70-1__heat shock cognate protein 70-1	F4KCE5_ARATHHS701_ARATH F4KCE5_ARATHHS701_ARATH
AT5G02500	AT-HSC70-1AtHsp70-1HSP70-1	AT-HSC70-1_AtHsp70-1_HSC70_HSC70-1_HSP70-1__heat shock cognate protein 70-1AT-HSC70-1_AtHsp70-1_HSC70_HSC70-1_HSP70-1__heat shock cognate protein 70-1	F4KCE5_ARATHHS701_ARATH F4KCE5_ARATHHS701_ARATH
AT4G28030		Acyl-CoA N-acyltransferases (NAT) superfamily protein	B9DG63_ARATHQ94AC8_ARATH
AT3G45780	JK224NPH1PHOT1RPT1	JK224_NPH1_PHOT1_RPT1__phototropin 1	PHOT1_ARATH
AT4G27500	PPI1	PPI1__proton pump interactor 1	PPI1_ARATH
AT2G02740	ATWHY3PTAC11	ATWHY3_PTAC11_WHY3__ssDNA-binding transcriptional regulator	WHY3_ARATH
AT5G02490	AtHsp70-2	AtHsp70-2_Hsp70-2__Heat shock protein 70 (Hsp 70) family protein	HS702_ARATH
AT4G21210	ATRP1	ATRP1_RP1__PPDK regulatory protein	PDRP1_ARATH
AT2G47130	AtSDR3	AtSDR3_SDR3__NAD(P)-binding Rossmann-fold superfamily protein	SDR3A_ARATH
AT4G24800	ECIP1MRF3	ECIP1_MRF3__MA3 domain-containing protein	MRF3_ARATH
AT1G11840	ATGLX1AtGLYI3	ATGLX1_AtGLYI3_GLX1__glyoxalase I homolog	GLX1_ARATH
AT1G12230		Aldolase superfamily protein	F4IC59_ARATHQ9FWX0_ARATH
AT4G16660	HSP70	HSP70__heat shock protein 70 (Hsp 70) family protein	HSP7R_ARATH
AT3G47800		Galactose mutarotase-like superfamily protein	Q9STT3_ARATH
AT5G60790	ABCF1ATGCN1	ABCF1_ATGCN1_GCN1__ABC transporter family protein	AB1F_ARATH
AT3G19420	ATPEN2PTEN2A	ATPEN2_PEN2_PTEN2A__PTEN 2	PTN2A_ARATH
AT2G25450		2-oxoglutarate (2OG) and Fe(II)-dependent oxygenase superfamily protein	GSL_ARATH
AT5G44320		Eukaryotic translation initiation factor 3 subunit 7 (eIF-3)	Q9FKV6_ARATH
AT5G16290	AHASS2AIP3VAT1	AHASS2_AIP3_VAT1__VALINE-TOLERANT 1	ILVH1_ARATH
AT1G15930		Ribosomal protein L7Ae/L30e/S12e/Gadd45 family protein	RS121_ARATH
AT3G13750	BGAL1	BGAL1_BGAL1__beta galactosidase 1	BGAL1_ARATH
AT3G45140	ATLOX2	ATLOX2_LOX2__lipoxygenase 2	LOX2_ARATH
AT1G01710		Acyl-CoA thioesterase family protein	F4HU51_ARATH
AT3G10090		Nucleic acid-binding, OB-fold-like protein	RS281_ARATH
AT5G03850		Nucleic acid-binding, OB-fold-like protein	RS281_ARATH
AT1G08450	AtCRT3EBS2PSL1	AtCRT3_CRT3_EBS2_PSL1__calreticulin 3	CALR3_ARATHF4HW29_ARATHF4HW30_ARATH
AT5G40450	RBB1	RBB1	F4KHD5_ARATH
AT5G54960	PDC2	PDC2__pyruvate decarboxylase-2	PDC2_ARATH
AT1G60550	DHNSECHID	DHNS_ECHID__enoyl-CoA hydratase/isomerase D	MENB_ARATH
AT1G77510	ATPDI6ATPDIL1-2	ATPDI6_ATPDIL1-2_PDI6_PDIL1-2__PDI-like 1-2	PDI12_ARATH
AT3G29360	UGD2	UGD2__UDP-glucose 6-dehydrogenase family protein	UGDH2_ARATH
AT1G15980	NDF1NDH48PnsB1	NDF1_NDH48_PnsB1__NDH-dependent cyclic electron flow 1	PNSB1_ARATH
AT1G45145	ATH5ATTRX5LIV1TRX-h5	ATH5_ATTRX5_LIV1_TRX-h5_TRX5__thioredoxin H-type 5	TRXH5_ARATH
AT2G38230	ATPDX1.1	ATPDX1.1_PDX1.1__pyridoxine biosynthesis 1.1	PDX11_ARATH
AT4G33480			A2RVW1_ARATH
AT3G44300	AtNIT2	AtNIT2_NIT2__nitrilase 2	NRL2_ARATH
AT4G25080	CHLM	CHLM__magnesium-protoporphyrin IX methyltransferase	CHLM_ARATH
AT1G62750	ATSCO1ATSCO1/CPEF-G	ATSCO1_ATSCO1/CPEF-G_SCO1__Translation elongation factor EFG/EF2 protein	EFGC_ARATH
AT1G62660	VI1	VI1__Glycosyl hydrolases family 32 protein	INVA3_ARATH
AT1G48850	EMB1144	EMB1144__chorismate synthase, putative / 5-enolpyruvylshikimate-3-phosphate phospholyase, putative	AROC_ARATHF4I032_ARATHF4I033_ARATH
AT5G05730	AMT1ASA1JDL1TRP5WEI2	AMT1_ASA1_JDL1_TRP5_WEI2__anthranilate synthase alpha subunit 1	F4K0T5_ARATHTRPE_ARATH
AT1G01090	PDH-E1 ALPHA	PDH-E1 ALPHA__pyruvate dehydrogenase E1 alpha	ODPA3_ARATH
AT5G61840	GUT1IRX10-LXYS1	GUT1_IRX10-L_XYS1__Exostosin family protein	IX10L_ARATH
AT5G49760		Leucine-rich repeat protein kinase family protein	Q8GZ99_ARATH
AT5G39580		Peroxidase superfamily protein	F4KEH2_ARATHPER62_ARATH
AT3G48530	KINγKING1	KINγ_KING1__SNF1-related protein kinase regulatory subunit gamma 1	KING1_ARATH
AT4G21380	ARK3	ARK3_RK3__receptor kinase 3	SD18_ARATH
AT1G55490	CPN60BCpn60beta1CPNB1LEN1	CPN60B_Cpn60beta1_CPNB1_LEN1__chaperonin 60 beta	CPNB1_ARATH
AT4G16260		Glycosyl hydrolase superfamily protein	BGNEM_ARATH
AT3G48560	AHASALSCSR1IMR1TZP5	AHAS_ALS_CSR1_IMR1_TZP5__chlorsulfuron/imidazolinone resistant 1	ILVB_ARATH
AT5G51070	CLPDERD1SAG15	CLPD_ERD1_SAG15__Clp ATPase	CLPD_ARATH
At5g18230		transcription regulator NOT2/NOT3/NOT5 family protein	F4JWJ6_ARATHF4JWJ7_ARATH
At5g06670	Kin7.5	Kin7.5__P-loop containing nucleoside triphosphate hydrolases superfamily protein	KN7L_ARATH
At4g10730		Protein kinase superfamily protein	F4JMF4_ARATH
At3g23540		alpha/beta-Hydrolases superfamily protein	F4J440_ARATHQ6NKN2_ARATH
At1g29320		Transducin/WD40 repeat-like superfamily protein	Q0V856_ARATH
At3g16565		alanine-tRNA ligases;nucleic acid binding;ligases, forming aminoacyl-tRNA and related compounds;nucleotide binding;ATP binding	A8MSD3_ARATHF4J2Q5_ARATH
At4g36210		Protein of unknown function (DUF726)	B3H797_ARATHF4JPN3_ARATHO65513_ARATH
At1g07615	Obg A-1	Obg A-1__GTP-binding protein Obg/CgtA	OBGM_ARATH
At1g03910	CTN	CTN	CATIN_ARATH
At1g16820		vacuolar ATP synthase catalytic subunit-related / V-ATPase-related / vacuolar proton pump-related	F4I600_ARATHF4I601_ARATH
At1g24460	TNO1	TNO1	F4I9A1_ARATHF4I9A2_ARATH
At1g58060		RNA helicase family protein	DEXH7_ARATH
At1g58230	BCHB	BCHB__binding	BCHB_ARATH
At1g11720	ATSS3	ATSS3_SS3__starch synthase 3	F4IAG1_ARATHSSY3_ARATH
At1g51840	SIF1	SIF1__protein kinase-related	F4IB68_ARATH
At2g14120	DRP3B	DRP3B__dynamin related protein	DRP3B_ARATHF4IFG1_ARATHF4IFG2_ARATH
At2g07690	MCM5	MCM5__Minichromosome maintenance (MCM2/3/5) family protein	F4INF9_ARATHMCM5_ARATH
At2g31060	EMB2785	EMB2785__elongation factor family protein	B3LF44_ARATHF4IPW4_ARATHF4IPW5_ARATH
At2g13370	CHR5	CHR5__chromatin remodeling 5	CHR5_ARATH
At3g03110	CRM1BXPO1B	CRM1B_XPO1B__exportin 1B	XPO1B_ARATH
At3g19870			F4JCE9_ARATH
At3g47890		Ubiquitin carboxyl-terminal hydrolase-related protein	F4JCR1_ARATH
At3g48050	SUO	SUO__BAH domain ;TFIIS helical bundle-like domain	F4JCS8_ARATH
At4g02350	SEC15B	SEC15B__exocyst complex component sec15B	SC15B_ARATH
At4g17650		Polyketide cyclase / dehydrase and lipid transport protein	F4JP95_ARATH
At4g24840	COG2	COG2	COG2_ARATH
At4g38470	STY46	STY46__ACT-like protein tyrosine kinase family protein	STY46_ARATH
At5g09390		CD2-binding protein-related	F4KCL2_ARATHQ8L4S3_ARATH
At5g59090	ATSBT4.12	ATSBT4.12_SBT4.12__subtilase 4.12	F4KHS1_ARATHF4KHS2_ARATHSBT4C_ARATH
At5g40850	AtUPM1	AtUPM1_UPM1__urophorphyrin methylase 1	F4KIS7_ARATHQ42606_ARATH
At4g01310	PRPL5	PRPL5__Ribosomal L5P family protein	RK5_ARATH
At4g37070	AtPLAIVAPLA IVAPLP1	AtPLAIVA_PLA IVA_PLP1__Acyl transferase/acyl hydrolase/lysophospholipase superfamily protein	A8MR01_ARATHPLP1_ARATH
At4g36430		Peroxidase superfamily protein	PER49_ARATH
At4g16150	CAMTA5	CAMTA5__calmodulin binding;transcription regulators	CMTA5_ARATH
At4g31700	AtRPS6RPS6A	AtRPS6_RPS6_RPS6A__ribosomal protein S6	A8MS03_ARATHRS61_ARATH
At2g39700	ATEXP4ATEXPA4ATHEXP ALPHA 1.6	ATEXP4_ATEXPA4_ATHEXP ALPHA 1.6_EXPA4_XPA4__expansin A4	EXPA4_ARATH
At4g32150	ATVAMP711	ATVAMP711_VAMP711__vesicle-associated membrane protein 711	VA711_ARATH
At2g34560	AtCCP1	AtCCP1_CCP1__P-loop containing nucleoside triphosphate hydrolases superfamily protein	B9DGC0_ARATHO64691_ARATH
At4g21530	APC4	APC4__Transducin/WD40 repeat-like superfamily protein	APC4_ARATH
At2g38280	ATAMPDFAC1	ATAMPD_FAC1__AMP deaminase, putative / myoadenylate deaminase, putative	AMPD_ARATH
At1g09160		Protein phosphatase 2C family protein	P2C05_ARATH
At1g09500		NAD(P)-binding Rossmann-fold superfamily protein	B9DG15_ARATHF4I101_ARATHO80533_ARATH
At3g22320	ATRPABC24.3NRPB5NRPD5RPB5A	ATRPABC24.3_NRPB5_NRPD5_RPB5A__Eukaryotic rpb5 RNA polymerase subunit family protein	RPB5A_ARATH
At2g29750	UGT71C1	UGT71C1__UDP-glucosyl transferase 71C1	U71C1_ARATH
At3g18210	CP2	CP2__2-oxoglutarate (2OG) and Fe(II)-dependent oxygenase superfamily protein	Q9LV19_ARATH
At1g75780	TUB1	TUB1__tubulin beta-1 chain	TBB1_ARATH
At3g48930	EMB1080	EMB1080__Nucleic acid-binding, OB-fold-like protein	RS111_ARATH
At3g21720	ICL	ICL__isocitrate lyase	ACEA_ARATH
At3g29200	ATCM1	ATCM1_CM1__chorismate mutase 1	CM1_ARATH
At5g10360	EMB3010RPS6B	EMB3010_RPS6B__Ribosomal protein S6e	F4KGU2_ARATHRS62_ARATH
At1g07660		Histone superfamily protein	A8MRV1_ARATHH4_ARATH
At2g33800	EMB3113PRPS5SCA1	EMB3113_PRPS5_RPS5_SCA1__Ribosomal protein S5 family protein	RR5_ARATH
At2g37770	AKR4C9ChlAKR	AKR4C9_ChlAKR__NAD(P)-linked oxidoreductase superfamily protein	AKRC9_ARATH
At1g76510	ARID4	ARID4__ARID/BRIGHT DNA-binding domain-containing protein	ARID5_ARATHF4I2F0_ARATH
At3g07570		Cytochrome b561/ferric reductase transmembrane with DOMON related domain	B561K_ARATH
At3g07660		Kinase-related protein of unknown function (DUF1296)	Q0WUY5_ARATH
At5g61500	ATATG3	ATATG3_ATG3__autophagy 3 (APG3)	ATG3_ARATH
At4g30840	NUP43	NUP43__Transducin/WD40 repeat-like superfamily protein	NUP43_ARATH
At5g39950	ATH2ATTRX2ATTRXH2	ATH2_ATTRX2_ATTRXH2_TRX2_TRXH2__thioredoxin 2	TRXH2_ARATH
At5g57550	XTH25XTR3	XTH25_XTR3__xyloglucan endotransglucosylase/hydrolase 25	XTH25_ARATH
At1g50250	FTSH1	FTSH1__FTSH protease 1	FTSH1_ARATH
At2g17030	AtSKIP23	AtSKIP23_SKIP23__F-box family protein with a domain of unknown function (DUF295)	SKI23_ARATH
At1g13980	EMB30GNMIZ2VAN7	EMB30_GN_MIZ2_VAN7__sec7 domain-containing protein	GNOM_ARATH
At5g11770		NADH-ubiquinone oxidoreductase 20 kDa subunit, mitochondrial	NDUS7_ARATH
At4g17190	FPS2	FPS2__farnesyl diphosphate synthase 2	F4JNF1_ARATHFPPS2_ARATH
At2g34630	GPPSGPS1	GPPS_GPS1__geranyl diphosphate synthase 1	SPS3_ARATH
At5g07300	BON2	BON2__Calcium-dependent phospholipid-binding Copine family protein	BON2_ARATH
At4g39820		Tetratricopeptide repeat (TPR)-like superfamily protein	Q5XF35_ARATH
At5g64220	CAMTA2	CAMTA2__Calmodulin-binding transcription activator protein with CG-1 and Ankyrin domains	CMTA2_ARATH
At1g72560	PSD	PSD__ARM repeat superfamily protein	XPOT_ARATH
At1g47600	BGLU34TGG4	BGLU34_TGG4__beta glucosidase 34	BGL34_ARATHF4HV16_ARATH
At4g20400	JMJ14PKDM7B	JMJ14_PKDM7B__JUMONJI 14	JMJ14_ARATH
At4g10110		RNA-binding (RRM/RBD/RNP motifs) family protein	Q8GW25_ARATH
At5g48030	GFA2	GFA2__gametophytic factor 2	GFA2_ARATH
At1g09080	BIP3	BIP3__Heat shock protein 70 (Hsp 70) family protein	BIP3_ARATH
At2g38770	EMB2765MAC7	EMB2765_MAC7__P-loop containing nucleoside triphosphate hydrolases superfamily protein	Q8L5Y4_ARATH
At3g49080	RPS9M	RPS9M__Ribosomal protein S5 domain 2-like superfamily protein	RPS9M_ARATH
At5g09870	CESA5MUM3	CESA5_MUM3__cellulose synthase 5	CESA5_ARATH
At1g09330	ECH	ECH	TVP23_ARATH
At2g21045	HAC1	HAC1__Rhodanese/Cell cycle control phosphatase superfamily protein	HARC1_ARATH
At3g48860	SCD2	SCD2	F4JF62_ARATHSCD2_ARATH
At2g44710		RNA-binding (RRM/RBD/RNP motifs) family protein	Q8RWQ1_ARATH
At1g04200			Q8RWV1_ARATH
At4g16340	SPK1	SPK1__guanyl-nucleotide exchange factors;GTPase binding;GTP binding	SPK1_ARATH
At1g29400	AML5	AML5_ML5__MEI2-like protein 5	AML5_ARATH
At4g24490	ATRGTA1	ATRGTA1_RGTA1__RAB geranylgeranyl transferase alpha subunit 1	PGTA1_ARATH
At2g31740		S-adenosyl-L-methionine-dependent methyltransferases superfamily protein	Q8VYT6_ARATH
At5g18670	BAM9BMY3	BAM9_BMY3__beta-amylase 3	BAM9_ARATH
At4g18460		D-Tyr-tRNA(Tyr) deacylase family protein	Q8VZ75_ARATH
At5g49220		Protein of unknown function (DUF789)	Q8VZK6_ARATH
At2g44065		Ribosomal protein L2 family	Q8VZU4_ARATH
At4g14300	AtRNP1RBGD4	AtRNP1_RBGD4__RNA-binding (RRM/RBD/RNP motifs) family protein	RNP1_ARATH
At4g13350	NIG	NIG__NSP (nuclear shuttle protein)-interacting GTPase	Q8W4K6_ARATH
At1g12970	PIRL3	PIRL3__plant intracellular ras group-related LRR 3	PIRL3_ARATH
At5g09860	AtHPR1AtTHO1	AtHPR1_AtTHO1_HPR1_THO1__nuclear matrix protein-related	F4KFC9_ARATHTHOC1_ARATH
At5g38600		Proline-rich spliceosome-associated (PSP) family protein / zinc knuckle (CCHC-type) family protein	Q93YW4_ARATH
At5g64130		cAMP-regulated phosphoprotein 19-related protein	A8MS32_ARATHF4KC91_ARATHQ93Z49_ARATH
At2g22590		UDP-Glycosyltransferase superfamily protein	U91A1_ARATH
At3g50560		NAD(P)-binding Rossmann-fold superfamily protein	Q943Z4_ARATH
At1g18480	AtSLP2	AtSLP2_SLP2__Calcineurin-like metallo-phosphoesterase superfamily protein	SLP2_ARATH
At2g14835		RING/U-box superfamily protein	Q944Q6_ARATH
At4g31050	LIP2	LIP2__Biotin/lipoate A/B protein ligase family	LIP2P_ARATH
At1g01910	AtGET3a	AtGET3a_GET3a__P-loop containing nucleoside triphosphate hydrolases superfamily protein	B3H5S5_ARATHF4HU77_ARATHQ949M9_ARATH
At1g71270	ATVPS52POKTTD8	ATVPS52_POK_TTD8_VPS52__Vps52 / Sac2 family	VP52A_ARATH
At2g18980		Peroxidase superfamily protein	PER16_ARATH
At1g47200	WPP2	WPP2__WPP domain protein 2	WPP2_ARATH
At1g67930	COG5	COG5__Golgi transport complex protein-related	COG5_ARATH
At1g69620	RPL34	RPL34__ribosomal protein L34	RL342_ARATH
At5g05850	PIRL1	PIRL1__plant intracellular ras group-related LRR 1	PIRL1_ARATH
At5g51430	EYE	EYE__conserved oligomeric Golgi complex component-related / COG complex component-related	COG7_ARATH
At5g46430		Ribosomal protein L32e	RL322_ARATH
At5g65910		BSD domain-containing protein	Q9FHP0_ARATH
At5g47990	CYP705A5THADTHAD1	CYP705A5_THAD_THAD1__cytochrome P450, family 705, subfamily A, polypeptide 5	THAD_ARATH
At5g67630		P-loop containing nucleoside triphosphate hydrolases superfamily protein	Q9FJW0_ARATH
At5g66860		Ribosomal protein L25/Gln-tRNA synthetase, anti-codon-binding domain	Q9FKZ4_ARATH
At5g46280	MCM3	MCM3__Minichromosome maintenance (MCM2/3/5) family protein	MCM3_ARATH
At5g64670		Ribosomal protein L18e/L15 superfamily protein	Q9FLF3_ARATH
At5g51720	At-NEET	At-NEET_NEET__2 iron, 2 sulfur cluster binding	NEET_ARATH
At5g39500	ERMO1GNL1	ERMO1_GNL1__GNOM-like 1	GNL1_ARATH
At5g42990	UBC18	UBC18__ubiquitin-conjugating enzyme 18	UBC18_ARATH
At5g51980		Transducin/WD40 repeat-like superfamily protein	C3H63_ARATH
At1g56560	A/N-InvA	A/N-InvA__Plant neutral invertase family protein	INVA_ARATH
At4g08770	Prx37	Prx37__Peroxidase superfamily protein	PER37_ARATH
At5g35200	PICALM3	PICALM3__ENTH/ANTH/VHS superfamily protein	CAP10_ARATH
At3g13530	MAP3KE1MAPKKK7	MAP3KE1_MAPKKK7__mitogen-activated protein kinase kinase kinase 7	M3KE1_ARATH
At3g20250	APUM5	APUM5_PUM5__pumilio 5	PUM5_ARATH
At1g22170		Phosphoglycerate mutase family protein	Q9LM13_ARATH
At1g06220	CLOGFA1MEE5	CLO_GFA1_MEE5__Ribosomal protein S5/Elongation factor G/III/V family protein	CLO_ARATH
At1g07360	MAC5A	MAC5A__CCCH-type zinc fingerfamily protein with RNA-binding domain	C3H4_ARATH
At1g32330	ATHSFA1D	ATHSFA1D_HSFA1D__heat shock transcription factor A1D	HFA1D_ARATH
At5g51300	AtSF1	AtSF1__splicing factor-related	SF1_ARATH
At3g22660	EBP2	EBP2__rRNA processing protein-related	EBP2_ARATH
At3g16780	RPL19B	RPL19B__Ribosomal protein L19e family protein	RL192_ARATH
At5g62290		nucleotide-sensitive chloride conductance regulator (ICln) family protein	ICLN_ARATH
At5g62180	AtCXE20	AtCXE20_CXE20__carboxyesterase 20	CXE20_ARATH
At5g53070		Ribosomal protein L9/RNase H1	Q9LVU5_ARATH
At3g26770		NAD(P)-binding Rossmann-fold superfamily protein	Q9LW34_ARATH
At3g43270		Plant invertase/pectin methylesterase inhibitor superfamily	PME32_ARATH
At3g55970	ATJRG21JAO3JOX3	ATJRG21_JAO3_JOX3_JRG21__jasmonate-regulated gene 21	DIOX3_ARATH
At3g62940	OTU5	OTU5__Cysteine proteinases superfamily protein	OTU5_ARATH
At3g62600	ATERDJ3B	ATERDJ3B_ERDJ3B__DNAJ heat shock family protein	DNJ19_ARATH
At3g62360		Carbohydrate-binding-like fold	Q9LZQ4_ARATH
At3g55770	WLIM2b	WLIM2b__GATA type zinc finger transcription factor family protein	F4IY33_ARATHWLI2B_ARATH
At4g02280	ATSUS3	ATSUS3_SUS3__sucrose synthase 3	SUS3_ARATH
At3g60500	CER7G3	CER7_G3__3'-5'-exoribonuclease family protein	CER7_ARATH
At3g44330			Q9M292_ARATH
At3g06850	BCE2DIN3LTA1	BCE2_DIN3_LTA1__2-oxoacid dehydrogenases acyltransferase family protein	ODB2_ARATH
At1g45130	AtBGAL5	AtBGAL5_BGAL5__beta-galactosidase 5	BGAL5_ARATH
At1g04810		26S proteasome regulatory complex, non-ATPase subcomplex, Rpn2/Psmd1 subunit	PSD1B_ARATH
At1g30700	AtBBE8	AtBBE8__FAD-binding Berberine family protein	BBE8_ARATH
At1g13180	ARP3ATARP3DIS1	ARP3_ATARP3_DIS1__Actin-like ATPase superfamily protein	ARP3_ARATH
At1g79570		Protein kinase superfamily protein with octicosapeptide/Phox/Bem1p domain	Q9SAJ2_ARATH
At4g36360	BGAL3	BGAL3__beta-galactosidase 3	BGAL3_ARATH
At5g07820		Plant calmodulin-binding protein-related	Q9SDA2_ARATH
At3g02080		Ribosomal protein S19e family protein	RS191_ARATH
At2g18150		Peroxidase superfamily protein	PER15_ARATH
At2g25530		AFG1-like ATPase family protein	Q9SKJ6_ARATH
At4g18800	ATHSGBPATRAB11BATRABA1DRABA1d	ATHSGBP_ATRAB11B_ATRABA1D_RABA1d__RAB GTPase homolog A1D	RAA1D_ARATH
At3g48340	CEP2	CEP2__Cysteine proteinases superfamily protein	CEP2_ARATH
At4g08310			Q9SUE9_ARATH
At4g20520		RNA binding;RNA-directed DNA polymerases	Q9SUM7_ARATH
At4g31490		Coatomer, beta subunit	COPB2_ARATH
At4g13660	ATPRR2	ATPRR2_PRR2__pinoresinol reductase 2	PILR2_ARATH
At4g27060	CNSPR2TOR1	CN_SPR2_TOR1__ARM repeat superfamily protein	TOR1_ARATH
At4g37880		LisH/CRA/RING-U-box domains-containing protein	RMD5_ARATH
At4g13460	SDG22SET22SUVH9	SDG22_SET22_SUVH9__SU(VAR)3-9 homolog 9	SUVH9_ARATH
At1g60080		3'-5'-exoribonuclease family protein	Q9ZUI4_ARATH
At2g39030	NATA1	NATA1__Acyl-CoA N-acyltransferases (NAT) superfamily protein	NATA1_ARATH
At2g06990	HEN2SOP3	HEN2_SOP3__RNA helicase, ATP-dependent, SK12/DOB1 protein	HEN2_ARATH
At5g12370	SEC10	SEC10__exocyst complex component sec10	F4K0X7_ARATHSECAA_ARATH
