# Supplementary material for: Proteome Dynamics of Persulfidation in Leaf Tissue under Light/Dark Conditions and Carbon Deprivation
Source: Antioxidants (Basel). 2023 Mar 23;12(4):789. doi: 10.3390/antiox12040789 (PMC10135009; doi:10.3390/antiox12040789)
Supplement: Supplementary file 1 [file antioxidants-12-00789-s001.zip › Dataset S8.xlsx]

## Sheet: ntools _at to AGI Converter Out
Dataset 8. Proteins only present or more persulfidated in leaf samples (S4) collected after 8 h light photoperiod
AGI	Gene_alias	Annotation	Uniprot
AT1G09430	ACLA-3	ACLA-3__ATP-citrate lyase A-3	ACLA3_ARATH
AT1G54100	ALDH7B4	ALDH7B4__aldehyde dehydrogenase 7B4	AL7B4_ARATH
AT4G21960	PRXR1	PRXR1__Peroxidase superfamily protein	PER42_ARATH
AT5G58490		NAD(P)-binding Rossmann-fold superfamily protein	Q9FGH3_ARATH
AT1G10760	GWDGWD1SEX1SOPSOP1	GWD_GWD1_SEX1_SOP_SOP1__Pyruvate phosphate dikinase, PEP/pyruvate binding domain	GWD1_ARATH
AT1G20160	ATSBT5.2CRSPSBT5.2(a)SBT5.2(b)	ATSBT5.2_CRSP_SBT5.2(a)_SBT5.2(b)__Subtilisin-like serine endopeptidase family protein	CRSP_ARATH
AT1G55020	ATLOX1	ATLOX1_LOX1__lipoxygenase 1	LOX1_ARATH
AT4G32320	APX6	APX6__ascorbate peroxidase 6	APX6_ARATH
AT1G73600	AtPMT3NMTNMT3	AtPMT3_NMT_NMT3__S-adenosyl-L-methionine-dependent methyltransferases superfamily protein	PEAM3_ARATH
AT1G06570	HPDHPPDPDS1	HPD_HPPD_PDS1__phytoene desaturation 1	F4IDP2_ARATHHPPD_ARATH
AT4G39800	ATIPS1ATMIPS1MI-1-P SYNTHASE	ATIPS1_ATMIPS1_MI-1-P SYNTHASE_MIPS1_MIPS1__myo-inositol-1-phosphate synthase 1	INO1_ARATH
AT1G07240	UGT71C5	UGT71C5__UDP-glucosyl transferase 71C5	U71C5_ARATH
AT3G46970	ATPHS2	ATPHS2_PHS2__alpha-glucan phosphorylase 2	PHS2_ARATH
AT3G48090	ATEDS1	ATEDS1_EDS1__alpha/beta-Hydrolases superfamily protein	EDS1C_ARATH
AT1G07750		RmlC-like cupins superfamily protein	Q9LQQ3_ARATH
AT4G34980	SLP2	SLP2__subtilisin-like serine protease 2	SBT16_ARATH
AT4G34230	ATCAD5CAD-5	ATCAD5_CAD-5_CAD5__cinnamyl alcohol dehydrogenase 5	CADH5_ARATHF4JKM2_ARATH
AT2G05990	ENR1MOD1	ENR1_MOD1__NAD(P)-binding Rossmann-fold superfamily protein	FABI_ARATH
AT5G50920	ATHSP93-VCLPCCLPC1DCA1	ATHSP93-V_CLPC_CLPC1_DCA1_HSP93-V__CLPC homologue 1	CLPC1_ARATH
AT1G64440	REB1RHD1UGE4	REB1_RHD1_UGE4__NAD(P)-binding Rossmann-fold superfamily protein	UGE4_ARATH
AT3G04120	GAPCGAPC-1GAPC1	GAPC_GAPC-1_GAPC1__glyceraldehyde-3-phosphate dehydrogenase C subunit 1	G3PC1_ARATH
AT2G46930	PAE3	PAE3__Pectinacetylesterase family protein	PAE3_ARATH
AT1G07140	SIRANBP	SIRANBP__Pleckstrin homology (PH) domain superfamily protein	RBP1A_ARATH
AT4G01070	GT72B1UGT72B1	GT72B1_UGT72B1__UDP-Glycosyltransferase superfamily protein	F4JHS0_ARATHU72B1_ARATH
AT1G08200	AXS2	AXS2__UDP-D-apiose/UDP-D-xylose synthase 2	AXS2_ARATH
AT5G03430		phosphoadenosine phosphosulfate (PAPS) reductase family protein	Q9LZE4_ARATH
AT3G17390	AtSAMS3MAT4MTO3	AtSAMS3_MAT4_MTO3_SAMS3__S-adenosylmethionine synthetase family protein	METK4_ARATH
AT3G50210		2-oxoglutarate (2OG) and Fe(II)-dependent oxygenase superfamily protein	DIOX2_ARATHF4J0J9_ARATH
AT3G06580	GAL1GALK	GAL1_GALK__Mevalonate/galactokinase family protein	GALK1_ARATH
AT2G30520	RPT2	RPT2__Phototropic-responsive NPH3 family protein	F4INU4_ARATHRPT2_ARATH
AT4G35630	PSAT1	PSAT1__phosphoserine aminotransferase	SERB1_ARATH
AT4G25630	ATFIB2	ATFIB2_FIB2__fibrillarin 2	FBRL2_ARATH
AT3G27300	G6PD5	G6PD5__glucose-6-phosphate dehydrogenase 5	G6PD5_ARATH
AT1G50480	THFS	THFS__10-formyltetrahydrofolate synthetase	FTHS_ARATH
AT1G07250	UGT71C4	UGT71C4__UDP-glucosyl transferase 71C4	U71C4_ARATH
AT3G18500		DNAse I-like superfamily protein	CCR4C_ARATHF4J8R6_ARATH
AT3G01480	ATCYP38	ATCYP38_CYP38__cyclophilin 38	CYP38_ARATH
AT1G09750		Eukaryotic aspartyl protease family protein	AED3_ARATH
AT3G60130	BGLU16	BGLU16__beta glucosidase 16	A8MSC6_ARATHBGL16_ARATHF4JAM3_ARATH
AT1G06760	H1.1	H1.1__winged-helix DNA-binding transcription factor family protein	H11_ARATH
AT4G21650	SBT3.13	SBT3.13__Subtilase family protein	SBT3D_ARATH
AT3G23640	HGL1	HGL1__heteroglycan glucosidase 1	Q93Y12_ARATH
AT2G44790	UCC2	UCC2__uclacyanin 2	BCB2_ARATH
AT2G47510	FUM1	FUM1__fumarase 1	FUM1_ARATH
AT5G40390	RS5SIP1	RS5_SIP1__Raffinose synthase family protein	RFS5_ARATH
AT1G62810	CuAO1	CuAO1__Copper amine oxidase family protein	AMO_ARATH
AT4G13940	ATSAHH1EMB1395HOG1MEE58SAH1	ATSAHH1_EMB1395_HOG1_MEE58_SAH1_SAHH1__S-adenosyl-L-homocysteine hydrolase	A8MQP1_ARATHF4JTV4_ARATHF4JTV5_ARATHSAHH1_ARATH
AT4G37470	KAI2	KAI2__alpha/beta-Hydrolases superfamily protein	KAI2_ARATH
AT4G38740	ROC1	ROC1__rotamase CYP 1	CP18C_ARATH
AT5G54830		DOMON domain-containing protein / dopamine beta-monooxygenase N-terminal domain-containing protein	B561A_ARATH
AT5G43600	ATAAH-2UAH	ATAAH-2_UAH__ureidoglycolate amidohydrolase	UAH_ARATH
AT2G04400	IGPS	IGPS__Aldolase-type TIM barrel family protein	TRPC_ARATH
AT1G11910	APA1ATAPA1AtPaspA1	APA1_ATAPA1_AtPaspA1_PaspA1__aspartic proteinase A1	APA1_ARATH
AT4G20360	ATRAB8DATRABE1BRABE1b	ATRAB8D_ATRABE1B_RABE1b__RAB GTPase homolog E1B	EFTU_ARATH
AT2G23420	NAPRT2	NAPRT2__nicotinate phosphoribosyltransferase 2	NPRT2_ARATH
AT5G44070	ARA8ATPCS1CAD1	ARA8_ATPCS1_CAD1_PCS1__phytochelatin synthase 1 (PCS1)	PCS1_ARATH
AT5G26710		Glutamyl/glutaminyl-tRNA synthetase, class Ic	SYEC_ARATH
AT4G14040	EDA38SBP2	EDA38_SBP2__selenium-binding protein 2	SEBP2_ARATH
AT5G51100	FSD2	FSD2__Fe superoxide dismutase 2	SODF2_ARATH
AT4G34450		coatomer gamma-2 subunit, putative / gamma-2 coat protein, putative / gamma-2 COP, putative	COPG_ARATH
AT5G42740		Sugar isomerase (SIS) family protein	G6PI_ARATH
AT1G64190	PGD1	PGD1__6-phosphogluconate dehydrogenase family protein	6PGD1_ARATH
AT3G14930	HEME1	HEME1__Uroporphyrinogen decarboxylase	DCUP1_ARATH
AT5G60600	CLB4CSB3GCPEHDSISPG	CLB4_CSB3_GCPE_HDS_ISPG__4-hydroxy-3-methylbut-2-enyl diphosphate synthase	B3H725_ARATHISPG_ARATH
AT1G51410		NAD(P)-binding Rossmann-fold superfamily protein	Q4PSZ5_ARATH
AT2G47980	ATSCC3	ATSCC3_SCC3__sister-chromatid cohesion protein 3	SCC3_ARATH
AT4G08900	ARGAH1	ARGAH1__arginase	ARGI1_ARATH
AT2G18080	EDA2	EDA2__Serine carboxypeptidase S28 family protein	EDA2_ARATH
AT1G03940		HXXXD-type acyl-transferase family protein	3AT1_ARATH
AT4G11600	ATGPX6GPXL6LSC803PHGPX	ATGPX6_GPX6_GPXL6_LSC803_PHGPX__glutathione peroxidase 6	GPX6_ARATH
AT5G20280	ATSPS1FSPSA1	ATSPS1F_SPS1F_SPSA1__sucrose phosphate synthase 1F	SPSA1_ARATH
AT5G58070	ATTIL	ATTIL_TIL__temperature-induced lipocalin	TIL_ARATH
AT5G67240	SDN3	SDN3__small RNA degrading nuclease 3	F4K3N3_ARATHSDN3_ARATH
AT5G53350	CLPX	CLPX__CLP protease regulatory subunit X	CLPX1_ARATH
AT2G32810	BGAL9	BGAL9_BGAL9__beta galactosidase 9	BGAL9_ARATHF4IUQ7_ARATH
AT1G20950		Phosphofructokinase family protein	PFPA1_ARATH
AT2G44040		Dihydrodipicolinate reductase, bacterial/plant	DAPB1_ARATH
AT3G23940	DHAD	DHAD__dehydratase family	ILVD_ARATH
AT5G22650	ATHD2ATHD2BHDA4HDT02HDT2	ATHD2_ATHD2B_HD2_HD2B_HDA4_HDT02_HDT2__histone deacetylase 2B	HDT2_ARATH
AT1G65450	GLC	GLC__HXXXD-type acyl-transferase family protein	O80816_ARATHQ1PFG7_ARATHQ8LDZ6_ARATH
AT4G22670	AtHip1HIP1TPR11	AtHip1_HIP1_TPR11__HSP70-interacting protein 1	F10AL_ARATH
AT1G31860	AT-IEHISN2	AT-IE_HISN2__histidine biosynthesis bifunctional protein (HISIE)	HIS2_ARATH
AT1G30690	PATL4	PATL4__Sec14p-like phosphatidylinositol transfer family protein	PATL4_ARATH
AT5G51820	ATPGMPPGM1STF1	ATPGMP_PGM_PGM1_STF1__phosphoglucomutase	PGMP_ARATH
AT2G35040		AICARFT/IMPCHase bienzyme family protein	O64767_ARATHQ8RWT5_ARATH
AT2G16950	ATTRN1	ATTRN1_TRN1__transportin 1	TNPO1_ARATH
AT5G01210		HXXXD-type acyl-transferase family protein	Q9LFB5_ARATH
AT1G02305	AtcathB2	AtcathB2__Cysteine proteinases superfamily protein	CATB2_ARATH
AT1G74090	ATSOT18ATST5B	ATSOT18_ATST5B_SOT18__desulfo-glucosinolate sulfotransferase 18	SOT18_ARATH
AT5G54080	AtHGO	AtHGO_HGO__homogentisate 1,2-dioxygenase	HGD_ARATH
AT1G26630	ATELF5A-2FBR12	ATELF5A-2_ELF5A-2_FBR12__Eukaryotic translation initiation factor 5A-1 (eIF-5A 1) protein	IF5A2_ARATH
AT3G02360	PGD2	PGD2__6-phosphogluconate dehydrogenase family protein	6PGD2_ARATH
AT1G75750	GASA1	GASA1__GAST1 protein homolog 1	F4I0N7_ARATHGASA1_ARATH
AT1G10360	ATGSTU18GST29	ATGSTU18_GST29_GSTU18__glutathione S-transferase TAU 18	GSTUI_ARATH
AT1G19690		NAD(P)-binding Rossmann-fold superfamily protein	Q147R9_ARATH
AT1G62740	Hop2	Hop2__stress-inducible protein, putative	HSOP2_ARATH
AT5G06460	ATUBA2UBA 2	ATUBA2_UBA 2__ubiquitin activating enzyme 2	UBE12_ARATH
AT2G39770	CYT1EMB101GMP1SOZ1VTC1	CYT1_EMB101_GMP1_SOZ1_VTC1__Glucose-1-phosphate adenylyltransferase family protein	GMPP1_ARATH
AT5G11520	ASP3YLS4	ASP3_YLS4__aspartate aminotransferase 3	AAT3_ARATH
AT2G24270	ALDH11A3	ALDH11A3__aldehyde dehydrogenase 11A3	F4INS6_ARATHGAPN_ARATH
AT4G16143	IMPA-2	IMPA-2__importin alpha isoform 2	IMPA2_ARATH
AT5G27380	AtGSH2GSHB	AtGSH2_GSH2_GSHB__glutathione synthetase 2	GSHB_ARATH
AT1G14810		semialdehyde dehydrogenase family protein	Q8VYI4_ARATH
AT1G79920	AtHsp70-15	AtHsp70-15_Hsp70-15__Heat shock protein 70 (Hsp 70) family protein	F4HQD5_ARATHHSP7P_ARATH
AT5G17990	pat1TRP1	pat1_TRP1__tryptophan biosynthesis 1	TRPD_ARATH
AT4G34180	CYCLASE1	CYCLASE1__Cyclase family protein	CYL1_ARATH
AT5G18170	GDH1	GDH1__glutamate dehydrogenase 1	DHE1_ARATH
AT5G52470	ATFBR1ATFIB1SKIP7	ATFBR1_ATFIB1_FBR1_FIB1_SKIP7__fibrillarin 1	FBRL1_ARATH
AT2G41680	NTRC	NTRC__NADPH-dependent thioredoxin reductase C	TRXB3_ARATH
AT1G19920	APS2ASA1ATPS2	APS2_ASA1_ATPS2__Pseudouridine synthase/archaeosine transglycosylase-like family protein	APS2_ARATH
AT1G62480		Vacuolar calcium-binding protein-related	Q9SXE9_ARATH
AT1G70730	PGM2	PGM2__Phosphoglucomutase/phosphomannomutase family protein	F4I6W3_ARATHF4I6W4_ARATHPGMC2_ARATH
AT5G49810	MMT	MMT__methionine S-methyltransferase	MMT1_ARATH
AT3G17810	PYD1	PYD1__pyrimidine 1	DPYD_ARATH
AT1G19570	ATDHAR1DHAR5	ATDHAR1_DHAR1_DHAR5__dehydroascorbate reductase	DHAR1_ARATH
AT5G45170		Haloacid dehalogenase-like hydrolase (HAD) superfamily protein	Q6NMA9_ARATH
AT5G46180	DELTA-OAT	DELTA-OAT__ornithine-delta-aminotransferase	OAT_ARATH
AT4G14710	ATARD2	ATARD2__RmlC-like cupins superfamily protein	B3H6E4_ARATHF4JIE0_ARATHF4JIE1_ARATHMTND3_ARATH
AT5G11670	ATNADP-ME2	ATNADP-ME2_NADP-ME2__NADP-malic enzyme 2	MAOP2_ARATH
AT4G39660	AGT2	AGT2__alanine:glyoxylate aminotransferase 2	AGT21_ARATH
AT1G48610		AT hook motif-containing protein	D1861_ARATHQ3ECU3_ARATH
AT4G04880	MAPDA	MAPDA__adenosine/AMP deaminase family protein	ADAL_ARATH
AT3G56310	AGAL3	AGAL3__Melibiase family protein	AGAL3_ARATH
AT2G22250	AATATAATMEE17PAT	AAT_ATAAT_MEE17_PAT__aspartate aminotransferase	PAT_ARATH
AT5G63570	GSA1	GSA1__glutamate-1-semialdehyde-2,1-aminomutase	GSA1_ARATH
AT1G78060		Glycosyl hydrolase family protein	BXL7_ARATH
AT3G53900	PYRRUPP	PYRR_UPP__uracil phosphoribosyltransferase	UPP_ARATH
AT3G25800	PDF1PP2AA2PR 65	PDF1_PP2AA2_PR 65__protein phosphatase 2A subunit A2	2AAB_ARATHF4JA59_ARATH
AT3G55010	ATPURMEMB2818PUR5	ATPURM_EMB2818_PUR5__phosphoribosylformylglycinamidine cyclo-ligase, chloroplast / phosphoribosyl-aminoimidazole synthetase / AIR synthase (PUR5)	PUR5_ARATH
AT1G16460	ATMST2ATRDH2STR2	ATMST2_ATRDH2_MST2_RDH2_ST2_STR2__rhodanese homologue 2	STR2_ARATH
AT3G03220	ATEXP13ATEXPA13ATHEXP ALPHA 1.22	ATEXP13_ATEXPA13_ATHEXP ALPHA 1.22_EXP13_EXPA13__expansin A13	EXP13_ARATH
AT1G27130	ATGSTU13GST12	ATGSTU13_GST12_GSTU13__glutathione S-transferase tau 13	GSTUD_ARATH
AT1G72160	PATL3	PATL3__Sec14p-like phosphatidylinositol transfer family protein	PATL3_ARATH
AT5G32470	PALE1TH-2TH2	PALE1_TH-2_TH2__Haem oxygenase-like, multi-helical	TENAC_ARATH
AT4G32940	AEP3AtLEG gammaGAMMA-VPEGAMMAVPE	AEP3_AtLEG gamma_GAMMA-VPE_GAMMAVPE_LEG gamma__gamma vacuolar processing enzyme	VPEG_ARATH
AT3G22120	CWLP	CWLP__cell wall-plasma membrane linker protein	Q9LIE9_ARATH
AT1G09830	PUR2	PUR2__Glycinamide ribonucleotide (GAR) synthetase	PUR2_ARATH
AT1G15540		2-oxoglutarate (2OG) and Fe(II)-dependent oxygenase superfamily protein	Q9M9D9_ARATH
AT1G68560	ATXYL1AXY3GH31TRG1	ATXYL1_AXY3_GH31_TRG1_XYL1__alpha-xylosidase 1	XYL1_ARATH
AT4G12910	scpl20	scpl20__serine carboxypeptidase-like 20	SCP20_ARATH
AT4G37000	ACD2ATRCCR	ACD2_ATRCCR__accelerated cell death 2 (ACD2)	RCCR_ARATH
AT2G22970	SCPL11	SCPL11__serine carboxypeptidase-like 11	A8MQP0_ARATHSCP11_ARATH
AT4G33640			COSA_ARATH
AT5G05890	UGT76C5	UGT76C5__UDP-Glycosyltransferase superfamily protein	U76C5_ARATH
AT5G62630	HIPL2	HIPL2__hipl2 protein precursor	HIPL2_ARATH
AT2G36530	ENO2LOS2	ENO2_LOS2__Enolase	ENO2_ARATH
AT1G42970	GAPB	GAPB__glyceraldehyde-3-phosphate dehydrogenase B subunit	G3PB_ARATH
AT3G52990		Pyruvate kinase family protein	A8MR07_ARATHQ94KE3_ARATH
AT1G54790		GDSL-like Lipase/Acylhydrolase superfamily protein	F4HYK6_ARATHGDL22_ARATH
AT5G25610	ATRD22	ATRD22_RD22__BURP domain-containing protein	RD22_ARATH
AT1G29880		glycyl-tRNA synthetase / glycine--tRNA ligase	SYGM1_ARATH
AT1G29870		tRNA synthetase class II (G, H, P and S) family protein	SYGC_ARATH
AT4G19880		Glutathione S-transferase family protein	F4JU03_ARATHF4JU04_ARATHQ8H121_ARATH
AT3G43810	AtCAM7ZBF3	AtCAM7_CAM7_ZBF3__calmodulin 7	CALM7_ARATH
AT2G41380		S-adenosyl-L-methionine-dependent methyltransferases superfamily protein	Q9ZVC3_ARATH
AT3G26650	GAPAGAPA-1	GAPA_GAPA-1__glyceraldehyde 3-phosphate dehydrogenase A subunit	G3PA1_ARATH
AT2G02560	ATCAND1ETA2HVETIP120	ATCAND1_CAND1_ETA2_HVE_TIP120__cullin-associated and neddylation dissociated	CAND1_ARATH
AT2G25840	OVA4	OVA4__Nucleotidylyl transferase superfamily protein	F4ISP4_ARATHF4ISP6_ARATHSYWM_ARATH
AT3G05180		GDSL-like Lipase/Acylhydrolase superfamily protein	GDL49_ARATH
AT5G40610	GPDHp	GPDHp__NAD-dependent glycerol-3-phosphate dehydrogenase family protein	GPDA1_ARATH
AT1G32520	OXR4	OXR4	Q682Q6_ARATH
AT3G63170	AtFAP1	AtFAP1_FAP1__Chalcone-flavanone isomerase family protein	FAP1_ARATH
AT3G17020		Adenine nucleotide alpha hydrolases-like superfamily protein	Q9LSP5_ARATH
AT3G10920	ATMSD1AtSOD1MEE33	ATMSD1_AtSOD1_MEE33_MSD1__manganese superoxide dismutase 1	F4J504_ARATHSODM1_ARATH
AT2G44160	MTHFR2	MTHFR2__methylenetetrahydrofolate reductase 2	MTHR2_ARATH
AT4G36760	APP1ATAPP1	APP1_ATAPP1__aminopeptidase P1	AMPP1_ARATH
AT4G23100	ATECS1AtGSH1CAD2GSHAPAD2RML1	ATECS1_AtGSH1_CAD2_GSH1_GSHA_PAD2_RML1__glutamate-cysteine ligase	F4JMS5_ARATHGSH1_ARATH
AT2G45600		alpha/beta-Hydrolases superfamily protein	CXE8_ARATH
AT3G05350		Metallopeptidase M24 family protein	AMPP2_ARATH
AT2G45790	ATPMM	ATPMM_PMM__phosphomannomutase	PMM_ARATH
AT2G31570	ATGPX2GPXL2	ATGPX2_GPX2_GPXL2__glutathione peroxidase 2	GPX2_ARATH
AT3G10520	AHB2ARATH GLB2ATGLB2NSHB2PGB2	AHB2_ARATH GLB2_ATGLB2_GLB2_HB2_NSHB2_PGB2__haemoglobin 2	HBL2_ARATH
AT3G16410	NSP4	NSP4__nitrile specifier protein 4	JAL29_ARATH
AT1G58684		Ribosomal protein S5 family protein	RS22_ARATH
AT1G58983		Ribosomal protein S5 family protein	RS22_ARATH
AT1G59359		Ribosomal protein S5 family protein	RS22_ARATH
AT3G51160	GMD2MUR1MUR_1	GMD2_MUR1_MUR_1__NAD(P)-binding Rossmann-fold superfamily protein	GMD2_ARATH
AT1G09620		ATP binding;leucine-tRNA ligases;aminoacyl-tRNA ligases;nucleotide binding;ATP binding;aminoacyl-tRNA ligases	SYLC_ARATH
AT5G63890	ATHDHHISN8	ATHDH_HDH_HISN8__histidinol dehydrogenase	HIS8_ARATH
AT2G46520		cellular apoptosis susceptibility protein, putative / importin-alpha re-exporter, putative	XPO2_ARATH
AT1G35580	A/N-InvGCINV1	A/N-InvG_CINV1__cytosolic invertase 1	CINV1_ARATHF4HZY9_ARATH
AT2G16780	MSI02MSI2NFC02NFC2	MSI02_MSI2_NFC02_NFC2__Transducin family protein / WD-40 repeat family protein	MSI2_ARATH
AT5G19550	AAT2ASP2	AAT2_ASP2__aspartate aminotransferase 2	AAT2_ARATH
AT1G67550	URE	URE__urease	UREA_ARATH
AT5G65780	ATBCAT-5	ATBCAT-5__branched-chain amino acid aminotransferase 5 / branched-chain amino acid transaminase 5 (BCAT5)	BCAT5_ARATHF4JXK3_ARATH
AT3G59990	MAP2B	MAP2B__methionine aminopeptidase 2B	MAP22_ARATH
AT5G39730		AIG2-like (avirulence induced gene) family protein	AIGLB_ARATH
AT1G72680	ATCAD1	ATCAD1_CAD1__cinnamyl-alcohol dehydrogenase	CADH1_ARATH
AT3G26618	ERF1-3	ERF1-3__eukaryotic release factor 1-3	ERF1Z_ARATH
AT2G30170	PBCP	PBCP__Protein phosphatase 2C family protein	P2C26_ARATH
AT3G09770	AIRP3AtAIRP3LOG2	AIRP3_AtAIRP3_LOG2__RING/U-box superfamily protein	F4J1B3_ARATHLOFG2_ARATH
AT3G53410	LUL2	LUL2__RING/U-box superfamily protein	LUL2_ARATH
AT5G55070		Dihydrolipoamide succinyltransferase	ODO2A_ARATH
AT1G13900	PAP2	PAP2__Purple acid phosphatases superfamily protein	PPA2_ARATH
AT4G30550	GGP3	GGP3__Class I glutamine amidotransferase-like superfamily protein	GGP3_ARATH
AT4G23670		Polyketide cyclase/dehydrase and lipid transport superfamily protein	Q9SUR0_ARATH
AT1G07780	PAI1TRP6	PAI1_TRP6__phosphoribosylanthranilate isomerase 1	B3H4J9_ARATHPAI1_ARATH
AT5G49980	AFB5	AFB5__auxin F-box protein 5	TIR1L_ARATH
AT2G27190	ATPAP12	ATPAP12_PAP12__purple acid phosphatase 12	PPA12_ARATH
AT1G23190	PGM3	PGM3__Phosphoglucomutase/phosphomannomutase family protein	PGMC1_ARATH
AT5G41670	PGD3	PGD3__6-phosphogluconate dehydrogenase family protein	6PGD3_ARATH
AT4G26700	ATFIM1	ATFIM1_FIM1__fimbrin 1	C0Z268_ARATHFIMB1_ARATH
AT3G14920		Peptide-N4-(N-acetyl-beta-glucosaminyl)asparagine amidase A protein	Q9LKB2_ARATH
AT5G64570	ATBXL4XYL4	ATBXL4_XYL4__beta-D-xylosidase 4	BXL4_ARATH
AT5G34940	AtGUS3	AtGUS3_GUS3__glucuronidase 3	F4JWV5_ARATHF4JWV6_ARATHHPSE3_ARATH
AT3G16170	AAE13	AAE13__AMP-dependent synthetase and ligase family protein	AAE13_ARATH
AT5G64860	AtDPE1	AtDPE1_DPE1__disproportionating enzyme	DPE1_ARATH
AT5G11680			Q9LYG2_ARATH
AT4G31180	IBI1	IBI1__Class II aminoacyl-tRNA and biotin synthetases superfamily protein	SYDC2_ARATH
AT4G16770		2-oxoglutarate (2OG) and Fe(II)-dependent oxygenase superfamily protein
AT3G59760	ATCS-COASC	ATCS-C_OASC__O-acetylserine (thiol) lyase isoform C	B9DFR6_ARATHCYSKM_ARATHF4J9F7_ARATH
AT5G53120	ATSPDS3SPMS	ATSPDS3_SPDS3_SPMS__spermidine synthase 3	F4KJ05_ARATHSPSY_ARATH
AT3G61220	SDR1	SDR1__NAD(P)-binding Rossmann-fold superfamily protein	F4JE70_ARATHSDR1_ARATH
AT5G24300	ATSS1	ATSS1_SS1__Glycogen/starch synthases, ADP-glucose type	SSY1_ARATH
AT1G20340	DRT112PETE2	DRT112_PETE2__Cupredoxin superfamily protein	PLAS2_ARATH
AT4G33090	APM1ATAPM1	APM1_ATAPM1__aminopeptidase M1	APM1_ARATH
AT5G09650	AtPPa6	AtPPa6_PPa6__pyrophosphorylase 6	IPYR6_ARATH
AT1G18210		Calcium-binding EF-hand family protein	CML27_ARATH
AT5G55660		DEK domain-containing chromatin associated protein	F4K4Y5_ARATH
AT5G16990		Zinc-binding dehydrogenase family protein	P2_ARATH
AT1G26320		Zinc-binding dehydrogenase family protein	F4IE59_ARATHQ9C677_ARATH
AT1G70310	SPDS2	SPDS2__spermidine synthase 2	SPDS2_ARATH
AT1G31230	AK-HSDHAK-HSDH I	AK-HSDH_AK-HSDH I__aspartate kinase-homoserine dehydrogenase i	AKH1_ARATH
AT5G11450	PPD5	PPD5__Mog1/PsbP/DUF1795-like photosystem II reaction center PsbP family protein	PPD5_ARATH
AT1G56700		Peptidase C15, pyroglutamyl peptidase I-like	A8MSE7_ARATHQ9FXC0_ARATH
AT3G52260		Pseudouridine synthase family protein	F4J6V3_ARATHPUS5_ARATH
AT5G59290	ATUXS3	ATUXS3_UXS3__UDP-glucuronic acid decarboxylase 3	F4KHU8_ARATHUXS3_ARATH
AT4G12730	FLA2	FLA2__FASCICLIN-like arabinogalactan 2	FLA2_ARATH
AT1G49630	ATPREP2	ATPREP2_PREP2__presequence protease 2	PREP2_ARATH
AT2G28470	BGAL8	BGAL8__beta-galactosidase 8	BGAL8_ARATHF4IIQ3_ARATH
AT1G53070		Legume lectin family protein	LECT3_ARATH
AT4G14030	AtSBP1	AtSBP1_SBP1__selenium-binding protein 1	SEBP1_ARATH
AT1G28570		SGNH hydrolase-type esterase superfamily protein	GDL6_ARATH
AT2G41220	GLU2	GLU2__glutamate synthase 2	GLTB2_ARATH
AT4G30810	scpl29	scpl29__serine carboxypeptidase-like 29	SCP29_ARATH
AT1G63770		Peptidase M1 family protein	B3H621_ARATHF4I3R0_ARATHF4I3R1_ARATHF4I3R4_ARATHPSA_ARATH
AT2G34470	PSKF109UREG	PSKF109_UREG__urease accessory protein G	F4IHW4_ARATHUREG_ARATH
AT1G12050	AtFAHSSCD1	AtFAH_FAH_SSCD1__fumarylacetoacetase, putative	FAH_ARATH
AT5G43060	RD21B	RD21B__Granulin repeat cysteine protease family protein	RD21B_ARATH
AT5G17050	UGT78D2	UGT78D2__UDP-glucosyl transferase 78D2	U78D2_ARATH
AT3G12290	MTHFD1	MTHFD1__Amino acid dehydrogenase family protein	FOLD2_ARATH
AT5G03690	AtFBA4	AtFBA4_FBA4__Aldolase superfamily protein	ALFC4_ARATH
AT1G55090		carbon-nitrogen hydrolase family protein	NADE_ARATH
AT4G13780		methionine--tRNA ligase, putative / methionyl-tRNA synthetase, putative / MetRS, putative	SYMC_ARATH
AT1G51730		Ubiquitin-conjugating enzyme family protein	Q9C8I1_ARATH
AT1G78380	ATGSTU19GST8	ATGSTU19_GST8_GSTU19__glutathione S-transferase TAU 19	GSTUJ_ARATH
AT2G22780	PMDH1	PMDH1__peroxisomal NAD-malate dehydrogenase 1	MDHX1_ARATH
AT1G10850		Leucine-rich repeat protein kinase family protein	Q940B9_ARATH
AT5G07460	ATMSRA2PMSR2	ATMSRA2_PMSR2__peptidemethionine sulfoxide reductase 2	MSRA2_ARATH
AT1G64400	LACS3	LACS3__AMP-dependent synthetase and ligase family protein	LACS3_ARATH
AT4G36090	ALKBH9C	ALKBH9C__oxidoreductase, 2OG-Fe(II) oxygenase family protein	F4JPL5_ARATHQ5RJC7_ARATHQ67Y44_ARATH
AT5G46290	KAS1KASI	KAS1_KASI__3-ketoacyl-acyl carrier protein synthase I	F4KHF4_ARATHKASC1_ARATH
AT2G14260	PIP	PIP__proline iminopeptidase	F4IFH2_ARATHPIP_ARATH
AT3G43300	ATMIN7BEN1BIG5	ATMIN7_BEN1_BIG5_MIN7__HOPM interactor 7	BIG5_ARATH
AT1G77670		Pyridoxal phosphate (PLP)-dependent transferases superfamily protein	Q9CAP1_ARATH
AT5G05870	UGT76C1	UGT76C1__UDP-glucosyl transferase 76C1	U76C1_ARATH
AT1G25350	OVA9	OVA9__glutamine-tRNA ligase, putative / glutaminyl-tRNA synthetase, putative / GlnRS, putative	F4ICG2_ARATHSYQ_ARATH
AT2G42690		alpha/beta-Hydrolases superfamily protein	PLA20_ARATH
AT3G45770		Polyketide synthase, enoylreductase family protein	F4J6R6_ARATHMECR_ARATH
AT3G24420	DLK2	DLK2__alpha/beta-Hydrolases superfamily protein	Q9LK01_ARATH
AT2G26340			F4IUI9_ARATHF4IUJ0_ARATH
AT3G51240	F3'HF3HTT6	F3'H_F3H_TT6__flavanone 3-hydroxylase	F4J3A5_ARATHFL3H_ARATH
AT3G01340		Transducin/WD40 repeat-like superfamily protein	SC13A_ARATH
AT3G55040	GSTL2	GSTL2__glutathione transferase lambda 2	GSTL2_ARATH
AT5G26780	SHM2	SHM2__serine hydroxymethyltransferase 2	GLYM2_ARATH
AT1G12000		Phosphofructokinase family protein	PFPB1_ARATH
AT1G28660		GDSL-like Lipase/Acylhydrolase superfamily protein	GDL12_ARATH
AT1G20225		Thioredoxin superfamily protein	Q8W456_ARATH
AT1G13280	AOC4	AOC4__allene oxide cyclase 4	AOC4_ARATH
AT3G52850	ATELPATELP1ATVSR1BP-80BP80BP80-1;1BP80BGFS1VSR1;1	ATELP_ATELP1_ATVSR1_BP-80_BP80_BP80-1;1_BP80B_GFS1_VSR1_VSR1;1__vacuolar sorting receptor homolog 1	VSR1_ARATH
AT1G14610	TWN2VALRS	TWN2_VALRS__valyl-tRNA synthetase / valine--tRNA ligase (VALRS)	SYVM1_ARATH
AT3G17880	ATHIP2ATTDX	ATHIP2_ATTDX_HIP_TDX__tetraticopeptide domain-containing thioredoxin	TDX_ARATH
AT3G26380	APSE	APSE__Melibiase family protein	F4JCI4_ARATH
AT2G42600	ATPPC2	ATPPC2_PPC2__phosphoenolpyruvate carboxylase 2	CAPP2_ARATH
AT3G05910	AtPAE12	AtPAE12__Pectinacetylesterase family protein	F4J9L0_ARATHPAE12_ARATH
AT2G41790		Insulinase (Peptidase family M16) family protein	IDE1_ARATH
AT3G57470		Insulinase (Peptidase family M16) family protein	F4J3D7_ARATHIDE2_ARATH
AT2G01630		O-Glycosyl hydrolases family 17 protein	A8MRK0_ARATHE133_ARATH
AT3G23990	HSP60HSP60-3B	HSP60_HSP60-3B__heat shock protein 60	CH60A_ARATH
AT4G34480		O-Glycosyl hydrolases family 17 protein	E137_ARATH
AT2G16230		O-Glycosyl hydrolases family 17 protein	F4IKB3_ARATH
AT1G53850	ATPAE1	ATPAE1_PAE1__20S proteasome alpha subunit E1	PSA5A_ARATH
AT1G74030	ENO1	ENO1__enolase 1	ENO1_ARATH
AT1G76550		Phosphofructokinase family protein	PFPA2_ARATH
AT5G42790	ARS5ATPSM30PAF1	ARS5_ATPSM30_PAF1__proteasome alpha subunit F1	PSA1A_ARATH
AT3G48110	EDDEDD1	EDD_EDD1__glycine-tRNA ligases	SYGM2_ARATH
AT3G27430	PBB1	PBB1__N-terminal nucleophile aminohydrolases (Ntn hydrolases) superfamily protein	F4IWI5_ARATHPSB7A_ARATH
AT5G65760		Serine carboxypeptidase S28 family protein	Q1JPM1_ARATH
AT5G23120	HCF136	HCF136__photosystem II stability/assembly factor, chloroplast (HCF136)	P2SAF_ARATH
AT1G28610		GDSL-like Lipase/Acylhydrolase superfamily protein	GDL10_ARATH
AT2G19480	NAP1;2NFA02NFA2	NAP1;2_NFA02_NFA2__nucleosome assembly protein 1;2	A8MRK6_ARATHF4ISI7_ARATHNAP1B_ARATH
AT2G27020	PAG1	PAG1__20S proteasome alpha subunit G1	PSA3_ARATH
AT1G59900	AT-E1 ALPHAIAR4L	AT-E1 ALPHA_E1 ALPHA_IAR4L__pyruvate dehydrogenase complex E1 alpha subunit	ODPA1_ARATH
AT1G74470		Pyridine nucleotide-disulphide oxidoreductase family protein	CHLP_ARATH
AT5G27470		seryl-tRNA synthetase / serine--tRNA ligase	SYSC_ARATH
AT2G26230	UOX	UOX__uricase / urate oxidase / nodulin 35, putative	URIC_ARATH
AT1G04080	PRP39PRP39a	PRP39_PRP39a__Tetratricopeptide repeat (TPR)-like superfamily protein	F4I448_ARATHF4I450_ARATHQ93ZR3_ARATH
AT4G34700	AtCIB22	AtCIB22_CIB22__LYR family of Fe/S cluster biogenesis protein	NDUB9_ARATH
AT1G27310	NTF2A	NTF2A__nuclear transport factor 2A	NTF2A_ARATH
AT5G43850	ARD4ATARD4	ARD4_ATARD4__RmlC-like cupins superfamily protein	MTND4_ARATH
AT4G05420	DDB1A	DDB1A__damaged DNA binding protein 1A	B3H6I9_ARATHDDB1A_ARATH
AT1G76440		HSP20-like chaperones superfamily protein	Q9S842_ARATH
AT1G53240	mMDH1	mMDH1__Lactate/malate dehydrogenase family protein	MDHM1_ARATH
AT3G54470		uridine 5'-monophosphate synthase / UMP synthase (PYRE-F) (UMPS)	UMPS_ARATH
AT3G59950		Peptidase family C54 protein	ATG4B_ARATHF4J9I3_ARATH
AT4G29260	VSP3	VSP3__HAD superfamily, subfamily IIIB acid phosphatase	Q9M0F5_ARATH
AT2G28720		Histone superfamily protein	H2B3_ARATH
AT5G10010	HIT4	HIT4	HIT4_ARATH
AT3G49220	PME34	PME34__Plant invertase/pectin methylesterase inhibitor superfamily	PME34_ARATH
AT5G58480		O-Glycosyl hydrolases family 17 protein	E139_ARATH
AT2G43710	AtSSI2FAB2LDW1	AtSSI2_FAB2_LDW1_SSI2__Plant stearoyl-acyl-carrier-protein desaturase family protein	F4IS32_ARATHSTAD7_ARATH
AT1G43800	AAD6FTM1SAD6	AAD6_FTM1_SAD6__Plant stearoyl-acyl-carrier-protein desaturase family protein	STAD6_ARATH
AT4G17040	CLPR4HON5	CLPR4_HON5__CLP protease R subunit 4	CLPR4_ARATH
AT4G01480	AtPPa5	AtPPa5_PPa5__pyrophosphorylase 5	IPYR5_ARATH
AT5G10920		L-Aspartase-like family protein	ARLY_ARATH
AT3G43600	AAO2AO3AOgammaatAO-2AtAO3	AAO2_AO3_AOgamma_atAO-2_AtAO3__aldehyde oxidase 2	ALDO2_ARATH
AT3G02870	VTC4	VTC4__Inositol monophosphatase family protein	B3H749_ARATHF4IYH1_ARATHVTC4_ARATH
AT1G24020	MLP423	MLP423__MLP-like protein 423	ML423_ARATH
AT4G27690	VPS26B	VPS26B__vacuolar protein sorting 26B	F4JJR0_ARATHVP26B_ARATH
AT1G60420	AtNRX1	AtNRX1_NRX1__DC1 domain-containing protein	NRX1_ARATH
AT3G21790		UDP-Glycosyltransferase superfamily protein	U71B7_ARATH
AT5G56030	AtHsp90.2ERD8HSP81-2HSP90.2	AtHsp90.2_ERD8_HSP81-2_HSP81.2_HSP90.2__heat shock protein 81-2	F4K6B6_ARATHHS902_ARATH
AT2G19940		oxidoreductases, acting on the aldehyde or oxo group of donors, NAD or NADP as acceptor;copper ion binding	ARGC_ARATH
AT5G63990		Inositol monophosphatase family protein	DPNP3_ARATHF4KC75_ARATH
AT5G20080		FAD/NAD(P)-binding oxidoreductase	NB5R2_ARATH
AT1G49740		PLC-like phosphodiesterases superfamily protein	Q9FXA0_ARATH
AT5G52310	COR78LTI140LTI78RD29A	COR78_LTI140_LTI78_RD29A__low-temperature-responsive protein 78 (LTI78) / desiccation-responsive protein 29A (RD29A)	RD29A_ARATH
AT5G41970		Metal-dependent protein hydrolase	F4K000_ARATH
AT1G78680	ATGGH2	ATGGH2_GGH2__gamma-glutamyl hydrolase 2	F4IBT7_ARATHGGH2_ARATH
AT4G06599		ubiquitin family protein	UBCP_ARATH
AT3G53420	AtPIP2;1PIP2A	AtPIP2;1_PIP2_PIP2;1_PIP2A__plasma membrane intrinsic protein 2A	PIP21_ARATH
AT2G29690	ASA2ATHANSYNAB	ASA2_ATHANSYNAB__anthranilate synthase 2	TRPX_ARATH
AT1G20696	HMGB3NFD03NFD3	HMGB3_NFD03_NFD3__high mobility group B3	HMGB3_ARATH
AT2G47790	GTS1	GTS1__Transducin/WD40 repeat-like superfamily protein	GTS1_ARATH
AT4G39090	RD19RD19A	RD19_RD19A__Papain family cysteine protease	RD19A_ARATH
AT3G17210	ATHS1	ATHS1_HS1__heat stable protein 1	POP3_ARATH
AT5G14920	GASA14	GASA14__Gibberellin-regulated family protein	F4K895_ARATHGASAE_ARATH
AT5G53850	DEP1	DEP1__haloacid dehalogenase-like hydrolase family protein	F4JYQ5_ARATHF4JYQ6_ARATHMTBC_ARATH
AT3G44200	ATNEK6IBO1	ATNEK6_IBO1_NEK6__NIMA (never in mitosis, gene A)-related 6	NEK5_ARATH
AT5G18200		UTP:galactose-1-phosphate uridylyltransferases;ribose-5-phosphate adenylyltransferases	AGLUP_ARATH
AT3G26060	ATPRX QPRXQ	ATPRX Q_PRXQ__Thioredoxin superfamily protein	F4JBC9_ARATHPRXQ_ARATH
AT1G11430	MORF9RIP9	MORF9_RIP9__plastid developmental protein DAG, putative	MORF9_ARATH
AT5G58770	AtcPT4AtCPT7	AtcPT4_AtCPT7_cPT4_CPT7__Undecaprenyl pyrophosphate synthetase family protein	DDPS2_ARATH
AT3G20410	CPK9	CPK9__calmodulin-domain protein kinase 9	CDPK9_ARATH
AT2G30200	EMB3147MCAMT	EMB3147_MCAMT__catalytics;transferases;[acyl-carrier-protein] S-malonyltransferases;binding	F4IMR0_ARATHQ8RU07_ARATH
AT2G33590	AtCRL1	AtCRL1_CRL1__NAD(P)-binding Rossmann-fold superfamily protein	O22809_ARATH
AT3G20390	RidA	RidA__endoribonuclease L-PSP family protein	RIDA_ARATH
AT4G22930	DHOASEPYR4	DHOASE_PYR4__pyrimidin 4	PYRC_ARATH
AT2G31390	FRK1FRK2	FRK1_FRK2__pfkB-like carbohydrate kinase family protein	SCRK1_ARATH
AT5G57960	Hflx	Hflx__GTP-binding protein, HflX	Q9FJM0_ARATH
AT3G16470	AtJAC1JAL35JR1	AtJAC1_JAL35_JR1__Mannose-binding lectin superfamily protein	JAL35_ARATH
AT2G37620	AAc1ACT1	AAc1_ACT1__actin 1	ACT1_ARATH
AT4G24770	ATRBP31ATRBP33CP31	ATRBP31_ATRBP33_CP31_RBP31__31-kDa RNA binding protein	CP31A_ARATH
AT3G54360	NCA1	NCA1__zinc ion binding	NCA1_ARATH
AT5G56740	HAC07HAC7HAG02HAG2	HAC07_HAC7_HAG02_HAG2__histone acetyltransferase of the GNAT family 2	HATB_ARATH
AT1G75330	OTC	OTC__ornithine carbamoyltransferase	OTC_ARATH
AT4G09720	ATRABG3A	ATRABG3A_RABG3A__RAB GTPase homolog G3A	F4JKR6_ARATHF4JKR7_ARATHRAG3A_ARATH
AT3G14850	TBL41	TBL41__TRICHOME BIREFRINGENCE-LIKE 41	TBL41_ARATH
AT2G27150	AAO3AOdeltaAt-AO3AtAAO3	AAO3_AOdelta_At-AO3_AtAAO3__abscisic aldehyde oxidase 3	ALDO3_ARATH
AT3G55120	A11AtCHICFITT5	A11_AtCHI_CFI_CHI_TT5__Chalcone-flavanone isomerase family protein	CFI1_ARATH
AT4G37980	ATCAD7CHRELI3ELI3-1	ATCAD7_CAD7_CHR_ELI3_ELI3-1__elicitor-activated gene 3-1	CADH7_ARATH
AT1G50380		Prolyl oligopeptidase family protein	Q9SX53_ARATH
AT5G47880	AteRF1-1ERF1-1	AteRF1-1_ERF1-1__eukaryotic release factor 1-1	ERF1X_ARATH
AT3G47000		Glycosyl hydrolase family protein	Q9SD73_ARATH
AT1G78820		D-mannose binding lectin protein with Apple-like carbohydrate-binding domain	EP1L1_ARATH
AT5G13430		Ubiquinol-cytochrome C reductase iron-sulfur subunit	UCRI1_ARATH
AT3G17340		ARM repeat superfamily protein	F4J549_ARATHF4J550_ARATH
AT4G02330	AtPME41ATPMEPCRB	AtPME41_ATPMEPCRB_PME41__Plant invertase/pectin methylesterase inhibitor superfamily	PME41_ARATH
AT2G33210	HSP60-2	HSP60-2__heat shock protein 60-2	CH60B_ARATHF4IVR2_ARATH
AT5G13120	ATCYP20-2Pnsl5	ATCYP20-2_CYP20-2_Pnsl5__cyclophilin 20-2	PNSL5_ARATH
AT4G02530	MPH2	MPH2__chloroplast thylakoid lumen protein	TL16_ARATH
AT3G17900			Q9ASZ4_ARATH
AT2G18230	AtPPa2	AtPPa2_PPa2__pyrophosphorylase 2	IPYR2_ARATH
AT1G08110	AtGLYI2GLXI:3	AtGLYI2_GLXI:3__lactoylglutathione lyase family protein / glyoxalase I family protein	B9DH52_ARATHLGUL_ARATH
AT1G75270	DHAR2	DHAR2__dehydroascorbate reductase 2	DHAR2_ARATH
AT1G06690		NAD(P)-linked oxidoreductase superfamily protein	Y1669_ARATH
AT1G36730		Translation initiation factor IF2/IF5	IF5Y_ARATH
AT5G17440	LUC7B	LUC7B__LUC7 related protein	Q940U9_ARATH
AT1G02475		Polyketide cyclase/dehydrase and lipid transport superfamily protein	Q94K52_ARATH
AT3G22460	OASA2	OASA2__O-acetylserine (thiol) lyase (OAS-TL) isoform A2	CYSK2_ARATH
AT3G04870	PDE181SPC1ZDS	PDE181_SPC1_ZDS__zeta-carotene desaturase	ZDS_ARATH
AT4G02520	ATGSTF2ATPM24ATPM24.1GST2	ATGSTF2_ATPM24_ATPM24.1_GST2_GSTF2__glutathione S-transferase PHI 2	GSTF2_ARATH
AT4G22285		Ubiquitin C-terminal hydrolases superfamily protein	Q8H148_ARATH
AT5G16510	RGP5	RGP5_RGP5__Alpha-1,4-glucan-protein synthase family protein	RGP5_ARATH
AT2G23820		Metal-dependent phosphohydrolase	F4IMN2_ARATHQ6DBH4_ARATH
AT1G26160		Metal-dependent phosphohydrolase	Q93ZV1_ARATH
AT5G65770	CRWN4LINC4	CRWN4_LINC4__little nuclei4	CRWN4_ARATH
AT1G62780			Q8VY70_ARATH
AT4G33810		Glycosyl hydrolase superfamily protein	XYN5_ARATH
AT5G63400	ADK1	ADK1__adenylate kinase 1	F4KAP2_ARATHKAD4_ARATH
AT4G00570	NAD-ME2	NAD-ME2__NAD-dependent malic enzyme 2	MAO2_ARATH
AT5G03740	HD2CHDT3	HD2C_HDT3__histone deacetylase 2C	HDT3_ARATH
AT1G30000	MNS3	MNS3__alpha-mannosidase 3	MNS3_ARATH
AT1G44790		ChaC-like family protein	GCT23_ARATH
AT1G20693	HMG BETA 1HMGB2NFD02NFD2	HMG BETA 1_HMGB2_NFD02_NFD2__high mobility group B2	HMGB2_ARATH
AT2G33740	CUTA	CUTA__Nitrogen regulatory PII-like, alpha/beta	CUTA_ARATH
AT1G14320	RPL10RPL10ASAC52	RPL10_RPL10A_SAC52__Ribosomal protein L16p/L10e family protein	RL101_ARATH
AT5G42720		Glycosyl hydrolase family 17 protein	Q8VY12_ARATH
AT1G16880	ACR11	ACR11__uridylyltransferase-related	ACR11_ARATHF4I613_ARATH
AT3G49140		Pentatricopeptide repeat (PPR) superfamily protein	Y3913_ARATH
AT3G13860	HSP60-3A	HSP60-3A__heat shock protein 60-3A	CH60C_ARATH
AT3G03590	SWIB4	SWIB4__SWIB/MDM2 domain superfamily protein	Q9SS61_ARATH
AT4G26910		Dihydrolipoamide succinyltransferase	ODO2B_ARATH
AT4G38800	ATMTAN1ATMTN1	ATMTAN1_ATMTN1_MTAN1_MTN1__methylthioadenosine nucleosidase 1	MTN1_ARATH
AT5G14780	AtFDH1	AtFDH1_FDH__formate dehydrogenase	FDH_ARATH
AT2G24200	atLAP1	atLAP1_LAP1__Cytosol aminopeptidase family protein	AMPL1_ARATHF4INR3_ARATH
AT3G52140	FMTFRIENDLYNOXY38	FMT_FRIENDLY_NOXY38__tetratricopeptide repeat (TPR)-containing protein	CLU_ARATHF4J5R9_ARATHF4J5S0_ARATH
AT3G14067	SASP	SASP__Subtilase family protein	SBT14_ARATH
AT5G17310	AtUGP2	AtUGP2_UGP2__UDP-glucose pyrophosphorylase 2	F4KGY8_ARATHUGPA1_ARATH
AT4G15490	UGT84A3	UGT84A3__UDP-Glycosyltransferase superfamily protein	U84A3_ARATH
AT3G06650	ACLB-1	ACLB-1__ATP-citrate lyase B-1	ACLB1_ARATH
AT1G29670	GDSL1	GDSL1__GDSL-like Lipase/Acylhydrolase superfamily protein	GDL15_ARATH
AT1G62710	AEP2BETA-VPEBETAVPE	AEP2_BETA-VPE_BETAVPE__beta vacuolar processing enzyme	VPEB_ARATH
AT3G49740		Tetratricopeptide repeat (TPR)-like superfamily protein	PP276_ARATH
AT2G32060		Ribosomal protein L7Ae/L30e/S12e/Gadd45 family protein	RS122_ARATH
AT5G41480	ATDFAEMB9GLA1	ATDFA_DFA_EMB9_GLA1__Folylpolyglutamate synthetase family protein	DHFS_ARATH
AT2G18020	EMB2296	EMB2296__Ribosomal protein L2 family	RL81_ARATH
AT3G51190		Ribosomal protein L2 family	RL82_ARATH
AT2G28790		Pathogenesis-related thaumatin superfamily protein	Q9ZV34_ARATH
AT5G62530	ALDH12A1ATP5CDH	ALDH12A1_ATP5CDH_P5CDH__aldehyde dehydrogenase 12A1	AL121_ARATH
AT3G50440	ATMES10	ATMES10_MES10__methyl esterase 10	MES10_ARATH
AT1G55150	AtRH20	AtRH20_RH20__DEA(D/H)-box RNA helicase family protein	RH20_ARATH
AT5G43430	ETFBETA	ETFBETA__electron transfer flavoprotein beta	B9DG90_ARATHB9DH42_ARATHETFB_ARATH
AT3G46550	FLA4SOS5	FLA4_SOS5__Fasciclin-like arabinogalactan family protein	FLA4_ARATH
AT4G14090		UDP-Glycosyltransferase superfamily protein	U75C1_ARATH
AT5G59420	ORP3C	ORP3C__OSBP(oxysterol binding protein)-related protein 3C	ORP3C_ARATH
AT2G25080	ATGPX1GPXL1	ATGPX1_GPX1_GPXL1__glutathione peroxidase 1	GPX1_ARATH
AT3G27925	DEG1DEGP1	DEG1_DEGP1__DegP protease 1	DEGP1_ARATH
AT3G12110	ACT11	ACT11__actin-11	ACT11_ARATH
AT3G53970	PTRE1	PTRE1__proteasome inhibitor-related	F4JBP8_ARATHPSMF1_ARATH
AT3G27960	KLCR2	KLCR2__Tetratricopeptide repeat (TPR)-like superfamily protein	KLCR2_ARATH
AT1G09340	CRBCSP41BHIP1.3	CRB_CSP41B_HIP1.3__chloroplast RNA binding	CP41B_ARATH
AT1G76990	ACR3	ACR3__ACT domain repeat 3	ACR3_ARATH
AT2G34790	AtBBE-like 15EDA28MEE23	AtBBE-like 15_EDA28_MEE23__FAD-binding Berberine family protein	BBE15_ARATH
AT1G30510	ATRFNR2	ATRFNR2_RFNR2__root FNR 2	FNRR2_ARATH
AT5G53370	ATPMEPCRF	ATPMEPCRF_PMEPCRF__pectin methylesterase PCR fragment F	PME61_ARATH
AT3G43800	ATGSTU27	ATGSTU27_GSTU27__glutathione S-transferase tau 27	GSTUR_ARATH
AT4G37560		Acetamidase/Formamidase family protein	Q8H1G4_ARATH
AT1G28290	AGP31	AGP31__arabinogalactan protein 31	AGP31_ARATH
AT5G55480	GDPDL4GPDL1SVL1	GDPDL4_GPDL1_SVL1__SHV3-like 1	GPDL4_ARATH
AT1G79440	ALDH5F1ENF1SSADHSSADH1	ALDH5F1_ENF1_SSADH_SSADH1__aldehyde dehydrogenase 5F1	SSDH_ARATH
AT3G02230	ATRGP1	ATRGP1_RGP1__reversibly glycosylated polypeptide 1	RGP1_ARATH
AT5G16570	GLN1;4	GLN1;4__glutamine synthetase 1;4	GLN14_ARATH
AT4G12980		Auxin-responsive family protein	B561O_ARATH
AT1G65980	TPX1	TPX1__thioredoxin-dependent peroxidase 1	F4ID64_ARATHPRX2B_ARATH
AT1G59700	ATGSTU16	ATGSTU16_GSTU16__glutathione S-transferase TAU 16	GSTUG_ARATH
AT5G12950		Putative glycosyl hydrolase of unknown function (DUF1680)	Q9LXU4_ARATH
AT5G27710			Q6NM16_ARATH
AT2G01140	AtFBA3PDE345	AtFBA3_FBA3_PDE345__Aldolase superfamily protein	ALFP3_ARATH
AT2G17265	DMR1HSK	DMR1_HSK__homoserine kinase	KHSE_ARATH
AT1G53120		RNA-binding S4 domain-containing protein	Q93YQ0_ARATH
AT4G02120	CTPS3	CTPS3__CTP synthase family protein	Q8L6Z9_ARATH
AT1G17160	RBSK	RBSK__pfkB-like carbohydrate kinase family protein	A8MQX7_ARATHRBSK_ARATH
AT3G56130	BADC1BLP3	BADC1_BLP3__biotin/lipoyl attachment domain-containing protein	B9DFB7_ARATHF4IY77_ARATHQ93W03_ARATHQ9LYM8_ARATH
AT5G20980	ATMS3	ATMS3_MS3__methionine synthase 3	METE3_ARATH
AT4G31300	PBA1	PBA1__N-terminal nucleophile aminohydrolases (Ntn hydrolases) superfamily protein	F4JRY2_ARATHPSB6_ARATH
AT5G54430	ATPHOS32	ATPHOS32_PHOS32__Adenine nucleotide alpha hydrolases-like superfamily protein	PHO32_ARATH
AT1G52780		Protein of unknown function (DUF2921)	F4IEK8_ARATH
AT3G05950		RmlC-like cupins superfamily protein	GL17_ARATH
AT4G31790		Tetrapyrrole (Corrin/Porphyrin) Methylases	DPH5_ARATH
AT5G26860	LON1LON_ARA_ARA	LON1_LON_ARA_ARA__lon protease 1	LONM1_ARATH
AT5G59910	HTB4	HTB4__Histone superfamily protein	H2B11_ARATH
AT2G45960	ATHH2PIP1;2PIP1BTMP-A	ATHH2_PIP1;2_PIP1B_TMP-A__plasma membrane intrinsic protein 1B	A8MRW1_ARATHB9DFR9_ARATHPIP12_ARATH
AT5G26600		Pyridoxal phosphate (PLP)-dependent transferases superfamily protein	CNIF3_ARATH
AT5G17220	ATGSTF12GST26TT19	ATGSTF12_GST26_GSTF12_TT19__glutathione S-transferase phi 12	GSTFC_ARATH
AT1G09760	U2A'	U2A'__U2 small nuclear ribonucleoprotein A	RU2A_ARATH
AT2G46760	AtGulLO6	AtGulLO6_GulLO6__D-arabinono-1,4-lactone oxidase family protein	GGLO6_ARATH
AT2G47400	CP12CP12-1	CP12_CP12-1__CP12 domain-containing protein 1	CP121_ARATH
AT1G49650		alpha/beta-Hydrolases superfamily protein	CXE4_ARATH
AT3G15260		Protein phosphatase 2C family protein	P2C39_ARATH
AT4G35220	CYCLASE2	CYCLASE2__Cyclase family protein	CYL2_ARATH
AT1G30070		SGS domain-containing protein	F4I4Q9_ARATHQ9C8R4_ARATH
AT5G35360	CAC2	CAC2__acetyl Co-enzyme a carboxylase biotin carboxylase subunit	ACCC_ARATHF4JYE0_ARATHF4JYE1_ARATH
AT5G08380	AGAL1AtAGAL1	AGAL1_AtAGAL1__alpha-galactosidase 1	AGAL1_ARATH
AT3G12490	ATCYS6ATCYSB	ATCYS6_ATCYSB_CYSB__cystatin B	CYT6_ARATH
AT1G16470	PAB1	PAB1__proteasome subunit PAB1	PSA2A_ARATH
AT4G17480		alpha/beta-Hydrolases superfamily protein	Q84JI7_ARATH
AT1G79500	AtkdsA1KDO8PS	AtkdsA1_KDO8PS__Aldolase-type TIM barrel family protein	KDSA1_ARATH
AT2G44350	ATCSCSY4	ATCS_CSY4__Citrate synthase family protein	CISY4_ARATH
ATCG00470	ATPE	ATPE__ATP synthase epsilon chain	ATPE_ARATH
AT1G09850	XBCP3	XBCP3__xylem bark cysteine peptidase 3	Q0WVJ5_ARATH
AT5G08100	ASPGA1	ASPGA1__N-terminal nucleophile aminohydrolases (Ntn hydrolases) superfamily protein	ASPGA_ARATHF4K9K7_ARATH
AT5G58470	TAF15b	TAF15b__TBP-associated factor 15B	TA15B_ARATH
AT2G22240	ATIPS2ATMIPS2	ATIPS2_ATMIPS2_MIPS2__myo-inositol-1-phosphate synthase 2	F4IIN3_ARATHINO2_ARATH
AT2G17870	ATCSP3	ATCSP3_CSP3__cold shock domain protein 3	CSP3_ARATH
AT1G21720	PBC1	PBC1__proteasome beta subunit C1	PSB3A_ARATH
AT3G02720	DJ-1dDJ1D	DJ-1d_DJ1D__Class I glutamine amidotransferase-like superfamily protein	DJ1D_ARATH
AT3G26720		Glycosyl hydrolase family 38 protein	B3H6B8_ARATHMANA1_ARATH
AT2G33470	ATGLTP1	ATGLTP1_GLTP1__glycolipid transfer protein 1	GLTP1_ARATH
AT4G09670		Oxidoreductase family protein	Y4967_ARATH
AT3G15020	mMDH2	mMDH2__Lactate/malate dehydrogenase family protein	A8MQK3_ARATHMDHM2_ARATH
AT1G23180		ARM repeat superfamily protein	Q8H0U3_ARATH
AT2G13560	NAD-ME1	NAD-ME1__NAD-dependent malic enzyme 1	MAO1_ARATH
AT4G36940	NAPRT1	NAPRT1__nicotinate phosphoribosyltransferase 1	NPRT1_ARATH
AT4G03200		catalytics	F4JI63_ARATHF4JI64_ARATH
AT1G09310		Protein of unknown function, DUF538	Q9ZPZ4_ARATH
AT5G47840	AMK2	AMK2__adenosine monophosphate kinase	KAD2_ARATH
AT1G76140		Prolyl oligopeptidase family protein	F4I2A0_ARATHF4I2A1_ARATH
AT2G27450	ATNLP1CPA	ATNLP1_CPA_NLP1__nitrilase-like protein 1	B9DGV9_ARATHNILP1_ARATH
AT3G09810	IDH-VI	IDH-VI__isocitrate dehydrogenase VI	IDH6_ARATH
AT2G20420		ATP citrate lyase (ACL) family protein	SUCB_ARATH
AT2G43910	ATHOL1	ATHOL1_HOL1__HARMLESS TO OZONE LAYER 1	F4IT14_ARATHHOL1_ARATH
AT5G08530	CI51NDUFV1	CI51_NDUFV1__51 kDa subunit of complex I	NDUV1_ARATH
AT2G05840	PAA2	PAA2__20S proteasome subunit PAA2	F4IIA5_ARATHPSA6B_ARATH
AT1G04410	c-NAD-MDH1	c-NAD-MDH1__Lactate/malate dehydrogenase family protein	MDHC1_ARATH
AT2G16940		Splicing factor, CC1-like	F4ILE0_ARATHF4ILE1_ARATHQ9ZVW9_ARATH
AT5G42470			Q5XF81_ARATH
AT4G14800	PBD2	PBD2__20S proteasome beta subunit D2	F4JIF9_ARATHPSB2B_ARATH
AT5G49530		SIN-like family protein	Q9FGZ3_ARATH
AT5G37600	ATGLN1;1ATGSR1GSR 1	ATGLN1;1_ATGSR1_GLN1;1_GSR 1__glutamine synthase clone R1	GLN11_ARATH
AT1G60140	ATTPS10	ATTPS10_TPS10_TPS10__trehalose phosphate synthase	TPS10_ARATH
AT1G66430	FRK3FRK6	FRK3_FRK6__pfkB-like carbohydrate kinase family protein	SCRK6_ARATH
AT3G11200	AL2	AL2__alfin-like 2	ALFL2_ARATHF4J673_ARATH
AT4G12770	AUXILIN-LIKE2	AUXILIN-LIKE2__Chaperone DnaJ-domain superfamily protein	AUXI2_ARATHF4JRF7_ARATH
AT5G45190		Cyclin family protein	CCT15_ARATHF4KD43_ARATH
AT5G54060	UF3GTUGT79B1	UF3GT_UGT79B1__UDP-glucose:flavonoid 3-o-glucosyltransferase	AXYLT_ARATH
AT2G20630	PIA1	PIA1__PP2C induced by AVRRPM1	P2C20_ARATH
AT4G24680	MOS1	MOS1__modifier of snc1	MOS1_ARATH
AT2G35830			B9DGK2_ARATHQ9SJ67_ARATH
AT3G45980	H2BHTB9	H2B_HTB9__Histone superfamily protein	H2B6_ARATH
AT5G03290	IDH-V	IDH-V__isocitrate dehydrogenase V	IDH5_ARATH
AT5G61760	ATIPK2BETA	ATIPK2BETA_IPK2B_IPK2BETA__inositol polyphosphate kinase 2 beta	IPMKB_ARATH
AT3G10850	GLX2-2GLY2	GLX2-2_GLY2__Metallo-hydrolase/oxidoreductase superfamily protein	GLO2C_ARATH
AT1G06900		Insulinase (Peptidase family M16) family protein	NRDC_ARATH
AT4G05150		Octicosapeptide/Phox/Bem1p family protein	Q940N7_ARATH
AT1G09390		GDSL-like Lipase/Acylhydrolase superfamily protein	GDL2_ARATH
AT5G11950	LOG8MOBP2	LOG8_MOBP2__Putative lysine decarboxylase family protein	LOG8_ARATH
AT1G54090	ATEXO70D2	ATEXO70D2_EXO70D2__exocyst subunit exo70 family protein D2	Q9SYG5_ARATH
AT5G16760	AtITPK1	AtITPK1_ITPK1__Inositol 1,3,4-trisphosphate 5/6-kinase family protein	ITPK1_ARATH
AT1G05180	AXR1	AXR1__NAD(P)-binding Rossmann-fold superfamily protein	AXR1_ARATHF4I7A3_ARATHF4I7A4_ARATH
AT1G31180	ATIMD3IPMDH1	ATIMD3_IMD3_IPMDH1__isopropylmalate dehydrogenase 3	LEU33_ARATH
AT3G10450	SCPL7	SCPL7__serine carboxypeptidase-like 7	F4J3S3_ARATHSCP7_ARATH
AT3G48690	ATCXE12	ATCXE12_CXE12__alpha/beta-Hydrolases superfamily protein	CXE12_ARATH
AT1G56330	ATSAR1ATSAR1BATSARA1B	ATSAR1_ATSAR1B_ATSARA1B_SAR1_SAR1B__secretion-associated RAS 1B	SAR1B_ARATH
AT4G27520	AtENODL2	AtENODL2_ENODL2__early nodulin-like protein 2	ENL2_ARATH
AT4G31990	AAT3ASP5ATAAT1	AAT3_ASP5_ATAAT1__aspartate aminotransferase 5	AAT5_ARATHB9DG21_ARATHF4JTH0_ARATH
AT4G23460		Adaptin family protein	APBLC_ARATH
AT5G60360	AALPSAG2	AALP_ALP_SAG2__aleurain-like protease	A8MQZ1_ARATHALEU_ARATHF4JYX9_ARATH
AT5G19150		pfkB-like carbohydrate kinase family protein	NNRD_ARATH
AT1G74920	ALDH10A8	ALDH10A8__aldehyde dehydrogenase 10A8	BADH1_ARATHF4HXD2_ARATH
AT1G32060	PRK	PRK__phosphoribulokinase	KPPR_ARATH
AT2G33255		Haloacid dehalogenase-like hydrolase (HAD) superfamily protein	GPPL3_ARATH
AT1G70890	MLP43	MLP43_MLP43__MLP-like protein 43	MLP43_ARATH
AT3G17820	ATGSKB6GLN1.3GLN1;3	ATGSKB6_GLN1.3_GLN1;3__glutamine synthetase 1.3	GLN13_ARATH
AT3G04590	AHL14	AHL14__AT hook motif DNA-binding family protein	AHL14_ARATHF4J4T1_ARATH
AT2G17630	PSAT2	PSAT2__Pyridoxal phosphate (PLP)-dependent transferases superfamily protein	SERB2_ARATH
AT5G46250	AtLARP6a	AtLARP6a_LARP6a__RNA-binding protein	LRP6A_ARATH
AT4G10710	SPT16	SPT16__global transcription factor C	SPT16_ARATH
AT1G56450	PBG1	PBG1__20S proteasome beta subunit G1	PSB4_ARATH
AT5G17330	AtGAD1	AtGAD1_GAD_GAD1__glutamate decarboxylase	DCE1_ARATH
AT3G17760	GAD5	GAD5__glutamate decarboxylase 5	DCE5_ARATH
AT1G23490	ARF1ATARFATARF1ATARFA1A	ARF1_ATARF_ATARF1_ATARFA1A__ADP-ribosylation factor 1	ARF2A_ARATH
AT5G13200	GER5	GER5__GRAM domain family protein	GEML5_ARATH
AT2G45470	AGP8FLA8	AGP8_FLA8__FASCICLIN-like arabinogalactan protein 8	FLA8_ARATH
AT5G50400	ATPAP27	ATPAP27_PAP27__purple acid phosphatase 27	PPA27_ARATH
AT3G08680		Leucine-rich repeat protein kinase family protein	Y3868_ARATH
AT1G67280	AtGLYI6	AtGLYI6__Glyoxalase/Bleomycin resistance protein/Dioxygenase superfamily protein	LGUC_ARATH
AT1G48420	ACD1ATACD1AtDCDD-CDES	ACD1_ATACD1_AtDCD_D-CDES_DCD__D-cysteine desulfhydrase	DCYD1_ARATH
AT5G56500	Cpn60beta3CPNB3	Cpn60beta3_CPNB3__TCP-1/cpn60 chaperonin family protein	CPNB3_ARATH
AT1G20440	AtCOR47RD17	AtCOR47_COR47_RD17__cold-regulated 47	COR47_ARATH
AT4G30690	AtIF3- 4AtINFC-4SVR9L	AtIF3- 4_AtINFC-4_SVR9L__Translation initiation factor 3 protein	F4JQD8_ARATHIF34_ARATH
AT2G19550		alpha/beta-Hydrolases superfamily protein	Q9ZUN7_ARATH
ATCG00780	RPL14	RPL14__ribosomal protein L14	RK14_ARATH
AT2G29470	ATGSTU3GST21	ATGSTU3_GST21_GSTU3__glutathione S-transferase tau 3	GSTU3_ARATH
AT1G02140	HAP1MAGOMEE63	HAP1_MAGO_MEE63__mago nashi family protein	MGN_ARATH
AT1G21880	LYM1LYP2	LYM1_LYP2__lysm domain GPI-anchored protein 1 precursor	LYM1_ARATH
AT4G25050	ACP4AtACP4	ACP4_AtACP4__acyl carrier protein 4	ACP4_ARATHF4JRT7_ARATH
AT3G26340		N-terminal nucleophile aminohydrolases (Ntn hydrolases) superfamily protein	PSB5B_ARATH
AT1G33240	AT-GTL1ATGTL1	AT-GTL1_ATGTL1_GTL1__GT-2-like 1	GTL1_ARATH
AT4G21280	PSBQPSBQ-1PSBQA	PSBQ_PSBQ-1_PSBQA__photosystem II subunit QA	PSBQ1_ARATH
AT5G17530		phosphoglucosamine mutase family protein	F4KH14_ARATHQ8W4R0_ARATH
AT4G16190		Papain family cysteine protease	RD19C_ARATH
AT2G21430		Papain family cysteine protease	RD19B_ARATH
AT4G00490	BAM2BMY9	BAM2_BMY9__beta-amylase 2	BAM2_ARATH
AT3G60820	PBF1	PBF1__N-terminal nucleophile aminohydrolases (Ntn hydrolases) superfamily protein	F4JD01_ARATHPSB1_ARATH
AT5G08180		Ribosomal protein L7Ae/L30e/S12e/Gadd45 family protein	NHP2_ARATH
AT1G50320	ATHXATX	ATHX_ATX_THX__thioredoxin X	TRXX_ARATH
AT1G74560	NRP1	NRP1__NAP1-related protein 1	NRP1_ARATH
AT4G27320	ATPHOS34	ATPHOS34_PHOS34__Adenine nucleotide alpha hydrolases-like superfamily protein	PHO34_ARATH
AT1G27970	NTF2B	NTF2B__nuclear transport factor 2B	A8MS55_ARATHNTF2B_ARATH
AT4G14570	AAREAtAARE	AARE_AtAARE__acylaminoacyl-peptidase-related	AARE_ARATH
AT3G48420		Haloacid dehalogenase-like hydrolase (HAD) superfamily protein	CBBY_ARATH
AT5G35970		P-loop containing nucleoside triphosphate hydrolases superfamily protein	F4K1G7_ARATH
AT2G37240		Thioredoxin superfamily protein	PXL2C_ARATH
AT5G02790	GSTL3	GSTL3__Glutathione S-transferase family protein	GSTL3_ARATH
AT4G26630	DEK3	DEK3__DEK domain-containing chromatin associated protein	Q9SUA1_ARATH
AT4G00830	LIF2	LIF2__RNA-binding (RRM/RBD/RNP motifs) family protein	HNRPQ_ARATH
AT1G74960	ATKAS2FAB1	ATKAS2_FAB1_KAS2__fatty acid biosynthesis 1	KASC2_ARATH
AT4G39330	ATCAD9	ATCAD9_CAD9__cinnamyl alcohol dehydrogenase 9	CADH9_ARATH
AT3G22630	PBD1PRCGB	PBD1_PRCGB__20S proteasome beta subunit D1	PSB2A_ARATH
AT3G61540		alpha/beta-Hydrolases superfamily protein	Q9M314_ARATH
AT5G02240		NAD(P)-binding Rossmann-fold superfamily protein	Y5224_ARATH
AT3G57050	CBL	CBL__cystathionine beta-lyase	F4J244_ARATHMETC_ARATH
AT1G14310		Haloacid dehalogenase-like hydrolase (HAD) superfamily protein	Q9M9T1_ARATH
AT5G35590	PAA1	PAA1__proteasome alpha subunit A1	PSA6A_ARATH
AT5G14590		Isocitrate/isopropylmalate dehydrogenase family protein	ICDHP_ARATH
AT3G51260	PAD1	PAD1__20S proteasome alpha subunit PAD1	PSA7A_ARATHQ2V3Q0_ARATH
AT5G55730	FLA1	FLA1__FASCICLIN-like arabinogalactan 1	FLA1_ARATH
AT1G13060	PBE1	PBE1__20S proteasome beta subunit E1	F4HP14_ARATHPSB5A_ARATH
AT5G34850	ATPAP26	ATPAP26_PAP26__purple acid phosphatase 26	PPA26_ARATH
AT5G22880	H2BHTB2	H2B_HTB2__histone B2	H2B10_ARATH
AT4G00755		F-box family protein	FB345_ARATH
AT1G48900		Signal recognition particle, SRP54 subunit protein	A8MSA9_ARATHSR543_ARATH
AT5G12040		Nitrilase/cyanide hydratase and apolipoprotein N-acyltransferase family protein	NILP3_ARATH
AT1G80460	GLI1NHO1	GLI1_NHO1__Actin-like ATPase superfamily protein	F4HS76_ARATHGLPK_ARATH
AT4G21470	ATFMN/FHY	ATFMN/FHY_FMN/FHY__riboflavin kinase/FMN hydrolase	FHYRK_ARATH
AT2G44970		alpha/beta-Hydrolases superfamily protein	F4IV43_ARATHQ84WV5_ARATH
AT1G12280	SUMM2	SUMM2__LRR and NB-ARC domains-containing disease resistance protein	SUMM2_ARATH
AT1G66200	ATGSR2GLN1;2	ATGSR2_GLN1;2_GSR2__glutamine synthase clone F11	F4ID91_ARATHF4ID92_ARATHGLN12_ARATH
AT5G15650	ATRGP2MUR5	ATRGP2_MUR5_RGP2__reversibly glycosylated polypeptide 2	RGP2_ARATH
AT1G09740		Adenine nucleotide alpha hydrolases-like superfamily protein	Q84TF6_ARATH
AT2G37500		arginine biosynthesis protein ArgJ family	ARGJ_ARATH
AT5G04740	ACR12	ACR12__ACT domain-containing protein	ACR12_ARATHF4JXP5_ARATH
AT1G60710	ATB2	ATB2__NAD(P)-linked oxidoreductase superfamily protein	ALKR4_ARATH
AT1G04130	AtTPR2	AtTPR2_TPR2__Tetratricopeptide repeat (TPR)-like superfamily protein	F4I456_ARATH
AT1G23820	SPDS1	SPDS1__spermidine synthase 1	F4I7M5_ARATHSPDS1_ARATH
AT1G77550		tubulin-tyrosine ligases;tubulin-tyrosine ligases	Q6IDC7_ARATH
AT4G21620		glycine-rich protein	F4JJL6_ARATHQ9SVT5_ARATH
AT3G62120	AtProRS-Cyt	AtProRS-Cyt_ProRS-Cyt__Class II aaRS and biotin synthetases superfamily protein	SYPC_ARATH
AT5G61580	PFK4	PFK4__phosphofructokinase 4	PFKA4_ARATH
AT5G47760	ATPGLP2ATPK5	ATPGLP2_ATPK5_PGLP2_PGLP2__2-phosphoglycolate phosphatase 2	PGP2_ARATH
AT3G14940	ATPPC3	ATPPC3_PPC3__phosphoenolpyruvate carboxylase 3	CAPP3_ARATH
AT1G04290		Thioesterase superfamily protein	P93828_ARATH
AT4G26690	GDPDL3GPDL2MRH5SHV3	GDPDL3_GPDL2_MRH5_SHV3__PLC-like phosphodiesterase family protein	GPDL3_ARATH
AT4G19420	PAE8	PAE8__Pectinacetylesterase family protein	PAE8_ARATH
AT5G13980		Glycosyl hydrolase family 38 protein	F4K5E7_ARATHMANA2_ARATH
AT3G50670	U1-70KU1SNRNP	U1-70K_U1SNRNP__U1 small nuclear ribonucleoprotein-70K	RU17_ARATH
AT4G05390	ATRFNR1	ATRFNR1_RFNR1__root FNR 1	F4JGF4_ARATHFNRR1_ARATH
AT3G47810	ATVPS29MAG1	ATVPS29_MAG1_VPS29__Calcineurin-like metallo-phosphoesterase superfamily protein	VPS29_ARATH
AT4G27070	TSB2	TSB2__tryptophan synthase beta-subunit 2	TRBP2_ARATH
AT5G48480		Lactoylglutathione lyase / glyoxalase I family protein	Y5848_ARATH
AT1G29700		Metallo-hydrolase/oxidoreductase superfamily protein	Q9C535_ARATH
AT1G28960	ATNUDT15ATNUDX15	ATNUDT15_ATNUDX15_NUDX15__nudix hydrolase homolog 15	NUD15_ARATH
AT5G38530	TSBtype2	TSBtype2__tryptophan synthase beta type 2	Q9FFW8_ARATH
AT1G79690	atnudt3NUDT3	atnudt3_NUDT3__nudix hydrolase homolog 3	NUDT3_ARATH
AT2G22420	PRX17	PRX17__Peroxidase superfamily protein	PER17_ARATH
AT4G35160	ASMT	ASMT__O-methyltransferase family protein	ASMT_ARATH
AT1G63460	ATGPX8GPXL8	ATGPX8_GPX8_GPXL8__glutathione peroxidase 8	GPX8_ARATH
AT2G26040	PYL2RCAR14	PYL2_RCAR14__PYR1-like 2	PYL2_ARATH
AT1G10960	ATFD1	ATFD1_FD1__ferredoxin 1	FER1_ARATH
AT4G26110	ATNAP1;1	ATNAP1;1_NAP1;1__nucleosome assembly protein1;1	B3H684_ARATHNAP1A_ARATH
AT1G49600	ATRBP47A	ATRBP47A_RBP47A__RNA-binding protein 47A	RB47A_ARATH
AT1G50575		Putative lysine decarboxylase family protein	Q93XW9_ARATH
AT4G13360		ATP-dependent caseinolytic (Clp) protease/crotonase family protein	HIBC6_ARATH
AT3G13940		DNA binding;DNA-directed RNA polymerases	Q9LVK6_ARATH
AT3G22110	PAC1	PAC1__20S proteasome alpha subunit C1	PSA4A_ARATH
AT4G32930			F4JVV4_ARATHQ8L948_ARATH
AT1G70810	CAR7	CAR7__Calcium-dependent lipid-binding (CaLB domain) family protein	CAR7_ARATH
AT2G36460	FBA6	FBA6__Aldolase superfamily protein	ALFC6_ARATHB3H6D7_ARATH
AT5G54160	AtCOMTATOMT1COMT1OMT3	AtCOMT_ATOMT1_COMT1_OMT1_OMT3__O-methyltransferase 1	OMT1_ARATH
AT1G65960	GAD2	GAD2__glutamate decarboxylase 2	DCE2_ARATHQ56W28_ARATH
AT5G05570		transducin family protein / WD-40 repeat family protein	F4K0R0_ARATHQ9FFF8_ARATH
AT2G32520		alpha/beta-Hydrolases superfamily protein	O80889_ARATH
AT3G09300	ORP3B	ORP3B__OSBP(oxysterol binding protein)-related protein 3B	ORP3B_ARATH
AT5G47080	CKB1	CKB1__casein kinase II beta chain 1	CSK2B_ARATHF4KIZ0_ARATHF4KIZ2_ARATHF4KIZ3_ARATH
AT2G14720	BP80-2;1MTV4VSR2;1VSR4	BP80-2;1_MTV4_VSR2;1_VSR4__vacuolar sorting receptor 4	VSR4_ARATH
AT1G21440		Phosphoenolpyruvate carboxylase family protein	Q501F7_ARATH
AT1G53310	ATPEPC1ATPPC1	ATPEPC1_ATPPC1_PEPC1_PPC1__phosphoenolpyruvate carboxylase 1	CAPP1_ARATH
AT4G32200	ASY2	ASY2__DNA-binding HORMA family protein	ASY2_ARATH
AT5G37850	ATSOS4	ATSOS4_SOS4__pfkB-like carbohydrate kinase family protein	F4K8N1_ARATHPDXK_ARATH
AT3G03250	AtUGP1	AtUGP1_UGP_UGP1__UDP-GLUCOSE PYROPHOSPHORYLASE 1	UGPA2_ARATH
AT4G30920	AtLAP2	AtLAP2_LAP2__Cytosol aminopeptidase family protein	AMPL2_ARATH
AT5G64370	BETA-UPPYD3	BETA-UP_PYD3__beta-ureidopropionase	BUP1_ARATH
AT4G21850	ATMSRB9	ATMSRB9_MSRB9__methionine sulfoxide reductase B9	MSRB9_ARATH
AT5G15970	AtCor6.6COR6.6KIN2	AtCor6.6_COR6.6_KIN2__stress-responsive protein (KIN2) / stress-induced protein (KIN2) / cold-responsive protein (COR6.6) / cold-regulated protein (COR6.6)	KIN2_ARATH
AT1G32470		Single hybrid motif superfamily protein	GCSH3_ARATH
AT1G76180	ERD14	ERD14__Dehydrin family protein	ERD14_ARATH
AT1G76100	PETE1	PETE1__plastocyanin 1	PLAS1_ARATH
AT5G13930	ATCHSTT4	ATCHS_CHS_TT4__Chalcone and stilbene synthase family protein	CHSY_ARATH
AT5G18040	HTT2	HTT2	HTT2_ARATH
AT1G56600	AtGolS2	AtGolS2_GolS2__galactinol synthase 2	GOLS2_ARATH
AT1G60470	AtGolS4	AtGolS4_GolS4__galactinol synthase 4	GOLS4_ARATH
AT1G20450	ERD10LTI29LTI45	ERD10_LTI29_LTI45__Dehydrin family protein	ERD10_ARATHF4HST2_ARATH
AT5G14200	ATIMD1	ATIMD1_IMD1__isopropylmalate dehydrogenase 1	B9DHH9_ARATHF4K5H6_ARATHLEU31_ARATH
AT1G80560	ATIMD2	ATIMD2_IMD2__isopropylmalate dehydrogenase 2	LEU32_ARATH
At3g03380	DEG7DegP7	DEG7_DegP7__DegP protease 7	DEGP7_ARATH
At1g56145		Leucine-rich repeat transmembrane protein kinase	F4I3K4_ARATH
At1g59520	CW7	CW7__CW7	F4ICZ7_ARATHF4ICZ9_ARATHQ9SLU1_ARATH
At1g59990	EMB3108HS3RH22	EMB3108_HS3_RH22__DEA(D/H)-box RNA helicase family protein	RH22_ARATH
At1g30460	ATCPSF30OXT6	ATCPSF30_CPSF30_OXT6__cleavage and polyadenylation specificity factor 30	CPSF_ARATH
At1g18950		DDT domain superfamily	DDR4_ARATH
At1g60200	RBM25	RBM25__splicing factor PWI domain-containing protein / RNA recognition motif (RRM)-containing protein	Q8VY15_ARATH
At1g48050	ATKU80	ATKU80_KU80__Ku80 family protein	KU80_ARATH
At1g33960	AIG1IAN8	AIG1_IAN8__P-loop containing nucleoside triphosphate hydrolases superfamily protein	IAN8_ARATH
At1g50600	SCL5	SCL5__scarecrow-like 5	SCL5_ARATH
At2g25170	CHD3CHR6CKH2EPP1GYMHRB2PKLSSL2	CHD3_CHR6_CKH2_EPP1_GYM_HRB2_PKL_SSL2__chromatin remodeling factor CHD3 (PICKLE)	PKL_ARATH
At2g44970		alpha/beta-Hydrolases superfamily protein	F4IV43_ARATHQ84WV5_ARATH
At2g26200	AtTRM140a	AtTRM140a_TRM140a__S-adenosyl-L-methionine-dependent methyltransferases superfamily protein	O64850_ARATH
At2g42010	PLDBETAPLDBETA1	PLDBETA_PLDBETA1__phospholipase D beta 1	PLDB1_ARATH
At2g25730			F4ISN0_ARATHQ9SL90_ARATH
At2g32150		Haloacid dehalogenase-like hydrolase (HAD) superfamily protein	Q9SKY5_ARATH
At4g17480		alpha/beta-Hydrolases superfamily protein	Q84JI7_ARATH
At5g47490		RGPR-related	SC16B_ARATH
At5g58410		HEAT/U-box domain-containing protein	LTN1_ARATH
At5g44530		Subtilase family protein	SBT23_ARATH
At3g45850		P-loop containing nucleoside triphosphate hydrolases superfamily protein	KN5D_ARATH
At3g04590	AHL14	AHL14__AT hook motif DNA-binding family protein	AHL14_ARATHF4J4T1_ARATH
At1g79280	AtTPRNUA	AtTPR_NUA__nuclear pore anchor	NUA_ARATH
At2g45960	ATHH2PIP1;2PIP1BTMP-A	ATHH2_PIP1;2_PIP1B_TMP-A__plasma membrane intrinsic protein 1B	A8MRW1_ARATHB9DFR9_ARATHPIP12_ARATH
At5g35180		Protein of unknown function (DUF1336)	B3H5W6_ARATHB3H745_ARATHF4JYC1_ARATHQ8W553_ARATH
At4g02405		S-adenosyl-L-methionine-dependent methyltransferases superfamily protein	B3H6G9_ARATHB6EUC2_ARATH
At1g45230		Protein of unknown function (DUF3223)	DCL_ARATHF4HRD2_ARATH
At1g35470	RanBPM	RanBPM__SPla/RYanodine receptor (SPRY) domain-containing protein	RANBM_ARATH
At1g55540	LNO1	LNO1__Nuclear pore complex protein	NP214_ARATH
At1g30070		SGS domain-containing protein	F4I4Q9_ARATHQ9C8R4_ARATH
At1g52780		Protein of unknown function (DUF2921)	F4IEK8_ARATH
At2g47500		P-loop nucleoside triphosphate hydrolases superfamily protein with CH (Calponin Homology) domain	KN14I_ARATH
At3g55380	UBC14	UBC14__ubiquitin-conjugating enzyme 14	F4IWU7_ARATHUBC14_ARATH
At3g55480	AP-3 betaPAT2WAT1	AP-3 beta_PAT2_WAT1__protein affected trafﬁcking 2	AP3BA_ARATHF4IWW1_ARATH
At3g08960		ARM repeat superfamily protein	F4IYK6_ARATH
At3g17340		ARM repeat superfamily protein	F4J549_ARATHF4J550_ARATH
At3g52050	OEX1	OEX1__5'-3' exonuclease family protein	A8MQG8_ARATHF4J5Q0_ARATHF4J5Q3_ARATHQ147H2_ARATH
At3g12915		Ribosomal protein S5/Elongation factor G/III/V family protein	F4JB05_ARATHF4JB06_ARATH
At3g47910		Ubiquitin carboxyl-terminal hydrolase-related protein	F4JCR2_ARATHF4JCR3_ARATH
At3g48195		Phox (PX) domain-containing protein	F4JDV4_ARATH
At4g21900	PRORP3	PRORP3__proteinaceous RNase P 3	PRRP3_ARATH
At4g13730		Ypt/Rab-GAP domain of gyp1p superfamily protein	F4JTS6_ARATHF4JTS7_ARATHQ9SVN9_ARATH
At5g65930	KCBPPKCBPZWI	KCBP_PKCBP_ZWI__kinesin-like calmodulin-binding protein (ZWICHEL)	F4JXM5_ARATHKN14E_ARATH
At5g61020	ECT3	ECT3__evolutionarily conserved C-terminal region 3	ECT3_ARATH
At5g43100		Eukaryotic aspartyl protease family protein	F4K4L3_ARATH
At5g43580	UPI	UPI__Serine protease inhibitor, potato inhibitor I-type family protein	F4K627_ARATH
At5g16280		Tetratricopeptide repeat (TPR)-like superfamily protein	F4KCQ9_ARATHF4KCR0_ARATH
At5g58240	FHIT	FHIT__FRAGILE HISTIDINE TRIAD	FHIT_ARATH
At5g47080	CKB1	CKB1__casein kinase II beta chain 1	CSK2B_ARATHF4KIZ0_ARATHF4KIZ2_ARATHF4KIZ3_ARATH
At2g40060	CLC2	CLC2__Clathrin light chain protein	CLC2_ARATH
At1g69960	PP2A	PP2A__serine/threonine protein phosphatase 2A	PP2A5_ARATH
At2g43770		Transducin/WD40 repeat-like superfamily protein	O22826_ARATH
At4g15400	ABS1BIA1	ABS1_BIA1__HXXXD-type acyl-transferase family protein	BIA1_ARATH
At5g66140	PAD2	PAD2__proteasome alpha subunit D2	PSA7B_ARATH
At2g30740		Protein kinase superfamily protein	PTI12_ARATH
At4g28480		DNAJ heat shock family protein	A8MR40_ARATHO49457_ARATH
At1g07320	EMB2784PRPL4	EMB2784_PRPL4_RPL4__ribosomal protein L4	Q2V4Q4_ARATHQ3EDH2_ARATHRK4_ARATH
At4g39730	ATPLAT1	ATPLAT1_PLAT1__Lipase/lipooxygenase, PLAT/LH2 family protein	PLAT1_ARATH
At2g41060		RNA-binding (RRM/RBD/RNP motifs) family protein	UBA2B_ARATH
At2g26040	PYL2RCAR14	PYL2_RCAR14__PYR1-like 2	PYL2_ARATH
At2g46740	AtGulLO5	AtGulLO5_GulLO5__D-arabinono-1,4-lactone oxidase family protein	GGLO5_ARATH
At2g46760	AtGulLO6	AtGulLO6_GulLO6__D-arabinono-1,4-lactone oxidase family protein	GGLO6_ARATH
At2g28990		Leucine-rich repeat protein kinase family protein	Y2899_ARATH
At4g10840	KLCR1	KLCR1__Tetratricopeptide repeat (TPR)-like superfamily protein	KLCR1_ARATH
At4g38540		FAD/NAD(P)-binding oxidoreductase family protein	MO2_ARATH
At4g10710	SPT16	SPT16__global transcription factor C	SPT16_ARATH
At5g63400	ADK1	ADK1__adenylate kinase 1	F4KAP2_ARATHKAD4_ARATH
At3g28300	AT14A	AT14A__Protein of unknown function (DUF677)	U496P_ARATH
At2g18790	HY3OOP1PHYB	HY3_OOP1_PHYB__phytochrome B	PHYB_ARATH
At2g18960	AHA1OST2PMA	AHA1_HA1_OST2_PMA__H(+)-ATPase 1	PMA1_ARATH
At4g27070	TSB2	TSB2__tryptophan synthase beta-subunit 2	TRBP2_ARATH
At1g54630	ACP3AtACP3	ACP3_AtACP3__acyl carrier protein 3	ACP3_ARATHF4HWZ6_ARATH
At2g36830	GAMMA-TIPGAMMA-TIP1TIP1;1	GAMMA-TIP_GAMMA-TIP1_TIP1;1__gamma tonoplast intrinsic protein	TIP11_ARATH
At3g50970	LTI30XERO2	LTI30_XERO2__dehydrin family protein	XERO2_ARATH
At3g05590	RPL18	RPL18__ribosomal protein L18	RL182_ARATH
At4g14110	COP9CSN8EMB143FUS7	COP9_CSN8_EMB143_FUS7__COP9 signalosome, subunit CSN8	CSN8_ARATH
At3g53420	AtPIP2;1PIP2A	AtPIP2;1_PIP2_PIP2;1_PIP2A__plasma membrane intrinsic protein 2A	PIP21_ARATH
At4g02060	MCM7PRL	MCM7_PRL__Minichromosome maintenance (MCM2/3/5) family protein	MCM7_ARATH
At4g32040	KNAT5	KNAT5__KNOTTED1-like homeobox gene 5	KNAT5_ARATH
At2g40590		Ribosomal protein S26e family protein	RS261_ARATH
At3g12110	ACT11	ACT11__actin-11	ACT11_ARATH
At2g39800	ATP5CSP5CS1	ATP5CS_P5CS1__delta1-pyrroline-5-carboxylate synthase 1	B9DFG0_ARATHF4IFZ9_ARATHP5CS1_ARATH
At2g44120		Ribosomal protein L30/L7 family protein	F4IT48_ARATHRL73_ARATH
At5g52040	At-RS41ATRSP41	At-RS41_ATRSP41_RS41__RNA-binding (RRM/RBD/RNP motifs) family protein	SRS41_ARATH
At1g14910	PICALM1b	PICALM1b__ENTH/ANTH/VHS superfamily protein	CAP9_ARATH
At3g12610	DRT100	DRT100__Leucine-rich repeat (LRR) family protein	DR100_ARATH
At1g10430	PP2A-2	PP2A-2__protein phosphatase 2A-2	PP2A2_ARATH
At3g53010		Domain of unknown function (DUF303)	Q0WNN6_ARATH
At5g19485		transferases;nucleotidyltransferases	Q1G3F7_ARATH
At2g31955	CNX2	CNX2__cofactor of nitrate reductase and xanthine dehydrogenase 2	CNX2_ARATH
At2g34420	LHB1B2LHCB1.5	LHB1B2_LHCB1.5__photosystem II light harvesting complex gene B1B2	Q39141_ARATH
At5g66880	SNRK2-3SRK2I	SNRK2-3_SNRK2.3_SRK2I__sucrose nonfermenting 1(SNF1)-related protein kinase 2.3	SRK2I_ARATH
At5g26600		Pyridoxal phosphate (PLP)-dependent transferases superfamily protein	CNIF3_ARATH
At5g17820	PER57	PER57__Peroxidase superfamily protein	PER57_ARATH
At5g20350	TIP1	TIP1__Ankyrin repeat family protein with DHHC zinc finger domain	ZDH22_ARATH
At1g65030		Transducin/WD40 repeat-like superfamily protein	Q5XEV4_ARATH
At4g21670	ATCPL1FRY2RCF2SHI4	ATCPL1_CPL1_FRY2_RCF2_SHI4__C-terminal domain phosphatase-like 1	CPL1_ARATH
At4g36090	ALKBH9C	ALKBH9C__oxidoreductase, 2OG-Fe(II) oxygenase family protein	F4JPL5_ARATHQ5RJC7_ARATHQ67Y44_ARATH
At3g43980		Ribosomal protein S14p/S29e family protein	RS29_ARATH
At4g19860		alpha/beta-Hydrolases superfamily protein	LCAT4_ARATH
At2g33610	ATSWI3BCHB2	ATSWI3B_CHB2_SWI3B__switch subunit 3	SWI3B_ARATH
At5g38020		S-adenosyl-L-methionine-dependent methyltransferases superfamily protein	Q84MB1_ARATH
At2g23890		HAD-superfamily hydrolase, subfamily IG, 5'-nucleotidase	Q84MD4_ARATH
At2g47850		Zinc finger C-x8-C-x5-C-x3-H type family protein	A8MR17_ARATHC3H32_ARATH
At1g44835		YbaK/aminoacyl-tRNA synthetase-associated domain	F4HPK3_ARATHQ8GXG9_ARATH
At1g29030		Apoptosis inhibitory protein 5 (API5)	Q8GXH2_ARATH
At1g78340	ATGSTU22	ATGSTU22_GSTU22__glutathione S-transferase TAU 22	GSTUM_ARATH
At4g15520		tRNA/rRNA methyltransferase (SpoU) family protein	Q8GYT1_ARATH
At1g18660	IAP1	IAP1__zinc finger (C3HC4-type RING finger) family protein	F4ICB5_ARATHQ8H0X2_ARATH
At1g15040	GATGAT1_2.1	GAT_GAT1_2.1__Class I glutamine amidotransferase-like superfamily protein	GT121_ARATH
At1g45196
At5g64030		S-adenosyl-L-methionine-dependent methyltransferases superfamily protein	PMTQ_ARATH
At4g28703		RmlC-like cupins superfamily protein	Q8LAH4_ARATH
At1g63460	ATGPX8GPXL8	ATGPX8_GPX8_GPXL8__glutathione peroxidase 8	GPX8_ARATH
At1g18800	NRP2	NRP2__NAP1-related protein 2	NRP2_ARATH
At5g24760		GroES-like zinc-binding dehydrogenase family protein	ADHL6_ARATH
At1g55265		Protein of unknown function, DUF538	Q8LEJ7_ARATH
At5g47700	RPP1.3RPP1C	RPP1.3_RPP1C__60S acidic ribosomal protein family	RLA13_ARATH
At1g13030	AtcoilinCOILIN	Atcoilin_COILIN__sphere organelles protein-related	COIL_ARATH
At2g27890
At5g27540	emb2473MIRO1	emb2473_MIRO1__MIRO-related GTP-ase 1	MIRO1_ARATH
At4g02330	AtPME41ATPMEPCRB	AtPME41_ATPMEPCRB_PME41__Plant invertase/pectin methylesterase inhibitor superfamily	PME41_ARATH
At1g71840		transducin family protein / WD-40 repeat family protein	Q8RXQ4_ARATH
At3g60245		Zinc-binding ribosomal protein family protein	R37A2_ARATH
At4g17620		glycine-rich protein	DXO_ARATHF4JP90_ARATHF4JP92_ARATH
At2g17640	ATSERAT3;1SAT-106	ATSERAT3;1_SAT-106__Trimeric LpxA-like enzymes superfamily protein	SAT2_ARATH
At4g32285	CAP1PICALM4b	CAP1_PICALM4b__ENTH/ANTH/VHS superfamily protein	CAP1_ARATH
At1g62780			Q8VY70_ARATH
At1g77940		Ribosomal protein L7Ae/L30e/S12e/Gadd45 family protein	RL302_ARATH
At1g04530	TPR4	TPR4__Tetratricopeptide repeat (TPR)-like superfamily protein	Q8VZ31_ARATH
At5g45510		Leucine-rich repeat (LRR) family protein	DRL36_ARATH
At3g02200		Proteasome component (PCI) domain protein	F4J2B4_ARATHQ8W4A0_ARATH
At4g12790		P-loop containing nucleoside triphosphate hydrolases superfamily protein	Q8W4C1_ARATH
At5g09880		Splicing factor, CC1-like	Q93Y25_ARATH
At3g56120	AtTRM5a	AtTRM5a_TRM5a__S-adenosyl-L-methionine-dependent methyltransferases superfamily protein	TRM51_ARATH
At5g26280		TRAF-like family protein	A8MR02_ARATHQ93Z83_ARATH
At3g16857	ARR1	ARR1_RR1__response regulator 1	ARR1_ARATH
At4g16100		Protein of unknown function (DUF789)	Q940I8_ARATH
At5g17440	LUC7B	LUC7B__LUC7 related protein	Q940U9_ARATH
At1g26300		BSD domain-containing protein	F4IE56_ARATHQ941A9_ARATH
At4g35230	BSK1	BSK1__BR-signaling kinase 1	BSK1_ARATH
At5g50310		Galactose oxidase/kelch repeat superfamily protein	Q945N1_ARATH
At5g04130	GYRB2	GYRB2__DNA GYRASE B2	GYRBM_ARATH
At5g56950	NAP1;3NFA03NFA3	NAP1;3_NFA03_NFA3__nucleosome assembly protein 1;3	NAP1C_ARATH
At1g12360	KEUSEC11	KEU_SEC11__Sec1/munc18-like (SM) proteins superfamily	KEULE_ARATH
At1g10840	TIF3H1	TIF3H1__translation initiation factor 3 subunit H1	EIF3H_ARATH
At3g57290	ATEIF3E-1ATINT6INT-6TIF3E1	ATEIF3E-1_ATINT6_EIF3E_INT-6_INT6_TIF3E1__eukaryotic translation initiation factor 3E	EIF3E_ARATH
At1g60850	AAC42ATRPAC42	AAC42_ATRPAC42__DNA-directed RNA polymerase family protein	F4HRL9_ARATHQ9C6C2_ARATH
At1g31850		S-adenosyl-L-methionine-dependent methyltransferases superfamily protein	PMTK_ARATH
At1g66280	BGLU22	BGLU22__Glycosyl hydrolase superfamily protein	BGL22_ARATH
At1g67890	RAF11	RAF11__PAS domain-containing protein tyrosine kinase family protein	F4HVH9_ARATHQ9C9V5_ARATH
At3g08680		Leucine-rich repeat protein kinase family protein	Y3868_ARATH
At3g10690	GYRA	GYRA__DNA GYRASE A	GYRA_ARATH
At3g04840		Ribosomal protein S3Ae	RS3A1_ARATH
At3g11510		Ribosomal protein S11 family protein	RS142_ARATH
At5g23830		MD-2-related lipid recognition domain-containing protein	B3H438_ARATHQ9FF97_ARATH
At5g05610	AL1	AL1__alfin-like 1	ALFL1_ARATH
At5g63550		DEK domain-containing chromatin associated protein	Q84JB7_ARATHQ9FFQ8_ARATH
At5g47480	MAG5	MAG5__RGPR-related	MAG5_ARATH
At5g49530		SIN-like family protein	Q9FGZ3_ARATH
At5g42190	ASK2SKP1B	ASK2_SKP1B__E3 ubiquitin ligase SCF complex subunit SKP1/ASK1 family protein	SKP1B_ARATH
At5g39580		Peroxidase superfamily protein	F4KEH2_ARATHPER62_ARATH
At5g37990	CIMT1	CIMT1__S-adenosyl-L-methionine-dependent methyltransferases superfamily protein	MT799_ARATH
At5g45190		Cyclin family protein	CCT15_ARATHF4KD43_ARATH
At5g56080	ATNAS2	ATNAS2_NAS2__nicotianamine synthase 2	NAS2_ARATH
At5g64610	HAM1	HAM1__histone acetyltransferase of the MYST family 1	MYST1_ARATH
At5g65770	CRWN4LINC4	CRWN4_LINC4__little nuclei4	CRWN4_ARATH
At5g04830		Nuclear transport factor 2 (NTF2) family protein	Q9FMC7_ARATH
At5g42830		HXXXD-type acyl-transferase family protein	Q9FMN6_ARATH
At5g13680	ABO1AtELP1ELO2	ABO1_AtELP1_ELO2__IKI3 family protein	ELP1_ARATH
At5g08560	ATWDR26	ATWDR26_WDR26__transducin family protein / WD-40 repeat family protein	WDR26_ARATH
At5g61140	BRR2c	BRR2c__U5 small nuclear ribonucleoprotein helicase	DEXHE_ARATHF4K203_ARATH
At1g75170		Sec14p-like phosphatidylinositol transfer family protein	F4HXG4_ARATHQ9FRK8_ARATH
At1g02690	IMPA-6	IMPA-6__importin alpha isoform 6	F4HXL3_ARATHIMPA6_ARATH
At1g41880		Ribosomal protein L35Ae family protein	R35A2_ARATH
At3g15450		Aluminium induced protein with YGL and LRDR motifs	B9DG40_ARATHF4IYS4_ARATHQ9LE80_ARATH
At5g16750	TOZ	TOZ__Transducin family protein / WD-40 repeat family protein	Q9LFE2_ARATH
At3g22220		hAT transposon superfamily	Q9LIE1_ARATH
At3g22170	CPD45FHY3	CPD45_FHY3__far-red elongated hypocotyls 3	FHY3_ARATH
At3g18600		P-loop containing nucleoside triphosphate hydrolases superfamily protein	RH51_ARATH
At3g27960	KLCR2	KLCR2__Tetratricopeptide repeat (TPR)-like superfamily protein	KLCR2_ARATH
At3g23830	AtGRP4GR-RBP4RBGA4	AtGRP4_GR-RBP4_GRP4_RBGA4__glycine-rich RNA-binding protein 4	RBG4_ARATH
At1g06410	ATTPS7ATTPSA	ATTPS7_ATTPSA_TPS7_TPS7__trehalose-phosphatase/synthase 7	TPS7_ARATH
At3g10530		Transducin/WD40 repeat-like superfamily protein	Q9LPP3_ARATH
At1g01630		Sec14p-like phosphatidylinositol transfer family protein	Q9LQ96_ARATH
At1g23490	ARF1ATARFATARF1ATARFA1A	ARF1_ATARF_ATARF1_ATARFA1A__ADP-ribosylation factor 1	ARF2A_ARATH
At3g25760	AOC1ERD12	AOC1_ERD12__allene oxide cyclase 1	AOC1_ARATH
At3g18820	ATRAB7BAtRabG1fATRABG3FRAB71	ATRAB7B_AtRabG1f_ATRABG3F_RAB71_RAB7B_RAB7B_RABG3F__RAB GTPase homolog G3F	RAG3F_ARATH
At3g25580		Thioredoxin superfamily protein	Q9LSU4_ARATH
At5g51280		DEAD-box protein abstrakt, putative	RH35_ARATH
At5g51140		Pseudouridine synthase family protein	F4KBV6_ARATHPUS7_ARATH
At5g54060	UF3GTUGT79B1	UF3GT_UGT79B1__UDP-glucose:flavonoid 3-o-glucosyltransferase	AXYLT_ARATH
At3g15680		Ran BP2/NZF zinc finger-like superfamily protein	Q9LW11_ARATH
At3g60340		alpha/beta-Hydrolases superfamily protein	Q9LY31_ARATH
At5g14520	PES	PES__pescadillo-related	PESC_ARATH
At4g30600		signal recognition particle receptor alpha subunit family protein	Q9M0A0_ARATH
At4g04800	ATMSRB3	ATMSRB3_MSRB3__methionine sulfoxide reductase B3	MSRB3_ARATH
At3g60210		GroES-like family protein	CH101_ARATH
At3g53890	EVR1RPS21B	EVR1_RPS21B__Ribosomal protein S21e	RS211_ARATH
At1g18740		Protein of unknown function (DUF793)	Q9M9U5_ARATH
At3g05060		NOP56-like pre RNA processing ribonucleoprotein	NOP5B_ARATH
At3g01150	ATPTB1	ATPTB1_PTB1__polypyrimidine tract-binding protein 1	B3H7H5_ARATHPTBP1_ARATH
At1g45000		AAA-type ATPase family protein	B3H533_ARATHPS10B_ARATH
At1g30720	AtBBE10	AtBBE10__FAD-binding Berberine family protein	BBE10_ARATH
At1g55510	BCDH BETA1	BCDH BETA1__branched-chain alpha-keto acid decarboxylase E1 beta subunit	ODBB1_ARATH
At4g25320	AHL3	AHL3__AT hook motif DNA-binding family protein	AHL3_ARATH
At3g50520		Phosphoglycerate mutase family protein	PGML4_ARATH
At3g05950		RmlC-like cupins superfamily protein	GL17_ARATH
At3g49390	CID10	CID10__CTC-interacting domain 10	CID10_ARATH
At1g17170	ATGSTU24	ATGSTU24_GST_GSTU24__glutathione S-transferase TAU 24	GSTUO_ARATH
At1g28610		GDSL-like Lipase/Acylhydrolase superfamily protein	GDL10_ARATH
At2g24590	At-RSZ22a	At-RSZ22a_RSZ22a__RNA recognition motif and CCHC-type zinc finger domains containing protein	RZ22A_ARATH
At1g08410	DIG6LSG1-2	DIG6_LSG1-2__P-loop containing nucleoside triphosphate hydrolases superfamily protein	LSG12_ARATH
At2g20360		NAD(P)-binding Rossmann-fold superfamily protein	NDUA9_ARATH
At2g32060		Ribosomal protein L7Ae/L30e/S12e/Gadd45 family protein	RS122_ARATH
At2g25620	AtDBP1	AtDBP1_DBP1__DNA-binding protein phosphatase 1	P2C22_ARATH
At2g19740		Ribosomal protein L31e family protein	RL311_ARATH
At2g40980		Protein kinase superfamily protein	Q9SLM4_ARATH
At4g19640	ARA-7ARA7atARA7ATRAB-F2BATRAB5BATRABF2B	ARA-7_ARA7_atARA7_ATRAB-F2B_ATRAB5B_ATRABF2B_RAB-F2B_RABF2B__Ras-related small GTP-binding family protein	RAF2B_ARATH
At3g46550	FLA4SOS5	FLA4_SOS5__Fasciclin-like arabinogalactan family protein	FLA4_ARATH
At3g56190	ALPHA-SNAP2ASNAP	ALPHA-SNAP2_ASNAP__alpha-soluble NSF attachment protein 2	F4IZC8_ARATHSNAA2_ARATH
At4g20430		Subtilase family protein	SBT22_ARATH
At3g51980		ARM repeat superfamily protein	Q9SV06_ARATH
At4g20820	AtBBE18	AtBBE18__FAD-binding Berberine family protein	BBE18_ARATH
At4g13170		Ribosomal protein L13 family protein	R13A3_ARATH
At4g35490	MRPL11	MRPL11__mitochondrial ribosomal protein L11	Q9SVW7_ARATH
At1g47490	ATRBP47C	ATRBP47C_RBP47C__RNA-binding protein 47C	RB47C_ARATH
At1g61730		DNA-binding storekeeper protein-related transcriptional regulator	STKLD_ARATH
At4g31870	ATGPX7GPXL7	ATGPX7_GPX7_GPXL7__glutathione peroxidase 7	GPX7_ARATH
At4g37410	CYP81F4	CYP81F4__cytochrome P450, family 81, subfamily F, polypeptide 4	C81F4_ARATH
At4g35160	ASMT	ASMT__O-methyltransferase family protein	ASMT_ARATH
At1g21660	AUXILIN-LIKE3	AUXILIN-LIKE3__Chaperone DnaJ-domain superfamily protein	Q9XI12_ARATH
At5g05700	ATATE1DLS1	ATATE1_ATE1_DLS1__arginine-tRNA protein transferase 1	ATE1_ARATH
At4g03430	EMB2770STA1	EMB2770_STA1__pre-mRNA splicing factor-related	STA1_ARATH
At2g37250	ADKATPADK1	ADK_ATPADK1__adenosine kinase	KAD1_ARATH
At2g27730		copper ion binding	UMP2_ARATH
At2g29260		NAD(P)-binding Rossmann-fold superfamily protein	TRNH5_ARATH
At2g29470	ATGSTU3GST21	ATGSTU3_GST21_GSTU3__glutathione S-transferase tau 3	GSTU3_ARATH
