# Supplementary material for: Proteome Dynamics of Persulfidation in Leaf Tissue under Light/Dark Conditions and Carbon Deprivation
Source: Antioxidants (Basel). 2023 Mar 23;12(4):789. doi: 10.3390/antiox12040789 (PMC10135009; doi:10.3390/antiox12040789)
Supplement: Supplementary file 1 [file antioxidants-12-00789-s001.zip › Dataset S9.xlsx]

## Sheet: Hoja1
Dataset 9. Identify proteins in Cluster 1 with reduced persulfidation level under severe carbon starvation
AGI_ID	Gene name	Protein name
At5g43450	At5g43450	1-aminocyclopropane-1-carboxylate oxidase homolog 10
At5g59530	At5g59530	1-aminocyclopropane-1-carboxylate oxidase homolog 11
At5g59540	At5g59540	1-aminocyclopropane-1-carboxylate oxidase homolog 12
At1g06650	At1g06650	1-aminocyclopropane-1-carboxylate oxidase homolog 3
At1g03400	At1g03400	1-aminocyclopropane-1-carboxylate oxidase homolog 4
At1g04350	At1g04350	1-aminocyclopropane-1-carboxylate oxidase homolog 6
At5g43440	At5g43440	1-aminocyclopropane-1-carboxylate oxidase homolog 9
At5g62790	DXR	1-deoxy-D-xylulose 5-phosphate reductoisomerase, chloroplastic
At4g14716	ARD2	1,2-dihydroxy-3-keto-5-methylthiopentene dioxygenase 2
At5g43850	ARD4	1,2-dihydroxy-3-keto-5-methylthiopentene dioxygenase 4
At3g60210	CPN10-1	10 kDa chaperonin 1, chloroplastic
At2g44650	CPN10-2	10 kDa chaperonin 2, chloroplastic
At1g76680	OPR1	12-oxophytodienoate reductase 1
At1g76690	OPR2	12-oxophytodienoate reductase 2
At4g09000	GRF1	14-3-3-like protein GF14 chi
At5g10450	GRF6	14-3-3-like protein GF14 lambda
At3g02520	GRF7	14-3-3-like protein GF14 nu
At1g78300	GRF2	14-3-3-like protein GF14 omega
At5g38480	GRF3	14-3-3-like protein GF14 psi
At5g16050	GRF5	14-3-3-like protein GF14 upsilon
At4g14210	PDS	15-cis-phytoene desaturase, chloroplastic/chromoplastic
At5g46420	At5g46420	16S rRNA processing protein RimM family
At1g16340	KDSA2	2-dehydro-3-deoxyphosphooctonate aldolase 2
At1g18500	IPMS1	2-isopropylmalate synthase 1, chloroplastic
At1g74040	IPMS2	2-isopropylmalate synthase 2, chloroplastic
At3g19000	At3g19000	2-oxoglutarate (2OG) and Fe(II)-dependent oxygenase superfamily protein
At4g16770	At4g16770	2-oxoglutarate (2OG) and Fe(II)-dependent oxygenase superfamily protein
At4g16330	At4g16330	2-oxoglutarate (2OG) and Fe(II)-dependent oxygenase superfamily protein
At5g20400	At5g20400	2-oxoglutarate (2OG) and Fe(II)-dependent oxygenase superfamily protein
At5g51880	MJM18.3	2-oxoglutarate (2OG) and Fe(II)-dependent oxygenase superfamily protein
At3g18210	CP2	2-oxoglutarate and iron-dependent oxygenase domain-containing protein CP2
At5g65750	MPA24.10	2-oxoglutarate dehydrogenase, E1 component
At1g09780	PGM1	2,3-bisphosphoglycerate-independent phosphoglycerate mutase 1
At5g09900	RPN5A	26S proteasome non-ATPase regulatory subunit 12 homolog A
At1g64520	RPN12A	26S proteasome non-ATPase regulatory subunit 8 homolog A
At1g09100	RPT5B	26S proteasome regulatory subunit 6A homolog B
At2g26590	RPN13	26S proteasome regulatory subunit RPN13
At4g32590	At4g32590	2Fe-2S ferredoxin-like superfamily protein
At5g66120	DHQS	3-dehydroquinate synthase, chloroplastic
At4g13430	IIL1	3-isopropylmalate dehydratase large subunit, chloroplastic
At2g43090	SSU1	3-isopropylmalate dehydratase small subunit 1
At2g43100	SSU2	3-isopropylmalate dehydratase small subunit 2
At3g58990	SSU3	3-isopropylmalate dehydratase small subunit 3
At5g14200	IMDH1	3-isopropylmalate dehydrogenase 1, chloroplastic
At4g24220	VEP1	3-oxo-Delta(4,5)-steroid 5-beta-reductase
At5g46290	KAS1	3-oxoacyl-[acyl-carrier-protein] synthase I, chloroplastic
At2g04540	KAS	3-oxoacyl-[acyl-carrier-protein] synthase, mitochondrial
At1g48860	F27K7.11	3-phosphoshikimate 1-carboxyvinyltransferase
At2g45300	At2g45300	3-phosphoshikimate 1-carboxyvinyltransferase, chloroplastic
At4g24770	CP31A	31 kDa ribonucleoprotein, chloroplastic
At2g40840	DPE2	4-alpha-glucanotransferase DPE2
At1g51680	4CL1	4-coumarate--CoA ligase 1
At5g60600	ISPG	4-hydroxy-3-methylbut-2-en-1-yl diphosphate synthase (ferredoxin), chloroplastic
At4g34350	ISPH	4-hydroxy-3-methylbut-2-enyl diphosphate reductase, chloroplastic
At1g07770;	RPS15AA	40S ribosomal protein S15a-1
At1g59359;	RPS2B	40S ribosomal protein S2-2
At2g40590	RPS26A	40S ribosomal protein S26-1
At3g03780	MS2	5-methyltetrahydropteroyltriglutamate--homocysteine methyltransferase 2
At5g37830	OXP1	5-oxoprolinase
At3g52050	At3g52050	5'-3' exonuclease family protein
At4g04610	APR1	5'-adenylylsulfate reductase 1, chloroplastic
At1g62180	APR2	5'-adenylylsulfate reductase 2, chloroplastic
At4g21990	APR3	5'-adenylylsulfate reductase 3, chloroplastic
At4g38800	MTN1	5'-methylthioadenosine nucleosidase
At1g07110	FKFBP	6-phosphofructo-2-kinase/fructose-2,6-bisphosphatase
At2g44050	At2g44050	6,7-dimethyl-8-ribityllumazine synthase, chloroplastic
At1g66580	RPL10C	60S ribosomal protein L10-3
At3g05560	RPL22B	60S ribosomal protein L22-2
At2g19730	RPL28A	60S ribosomal protein L28-1
At1g02890	At1g02890	AAA-type ATPase family protein
At5g60790	ABCF1	ABC transporter F family member 1
At1g64550	ABCF3	ABC transporter F family member 3
At3g54540	ABCF4	ABC transporter F family member 4
At5g44110	ABCI21	ABC transporter I family member 21
At3g10670	ABCI6	ABC transporter I family member 6, chloroplastic
At4g37560	At4g37560	Acetamidase/Formamidase family protein
At5g16290	VAT1	Acetolactate synthase small subunit 1, chloroplastic
At3g48560	ALS	Acetolactate synthase, chloroplastic
At1g80600	WIN1	Acetylornithine aminotransferase, chloroplastic/mitochondrial
At4g17830	At4g17830	Acetylornithine deacetylase
At1g32070	NSI	Acetyltransferase NSI
At4g35830	ACO1	Aconitate hydratase 1;Aconitate hydratase
At4g26970	ACO2	Aconitate hydratase 2, mitochondrial
At2g05710	ACO3	Aconitate hydratase 3, mitochondrial
At1g76990	ACR3	ACT domain-containing protein ACR3
At5g59880	ADF3	Actin-depolymerizing factor 3
At5g59890	ADF4	Actin-depolymerizing factor 4
At3g18060	AIP1-2	Actin-interacting protein 1-2
At1g30540	At1g30540	Actin-like ATPase superfamily protein
At1g13180	ARP3	Actin-related protein 3
At2g44620	MTACP1	Acyl carrier protein 1, mitochondrial
At4g25050	ACP4	Acyl carrier protein 4, chloroplastic
At1g68260	ALT3	Acyl-acyl carrier protein thioesterase ATL3, chloroplastic
At5g11340	At5g11340	Acyl-CoA N-acyltransferases (NAT) superfamily protein
At1g26220	At1g26220	Acyl-CoA N-acyltransferases (NAT) superfamily protein
At4g14570	AARE	Acylamino-acid-releasing enzyme
At2g47710	At2g47710	Adenine nucleotide alpha hydrolases-like superfamily protein
At4g22570	APT3	Adenine phosphoribosyltransferase 3
At5g63400	ADK1	Adenylate kinase 4
At4g18440	At4g18440	Adenylosuccinate lyase
At2g14750	APK1	Adenylyl-sulfate kinase 1, chloroplastic
At4g39940	APK2	Adenylyl-sulfate kinase 2, chloroplastic
At5g18200	At5g18200	ADP-glucose phosphorylase
At1g23490	ARF2-A	ADP-ribosylation factor 2-A
At1g10630	ARFA1F	ADP-ribosylation factor A1F
At5g08170	AIH	Agmatine deiminase
At3g12050	MEC18.18	Aha1 domain-containing protein
At1g17290	ALAAT1	Alanine aminotransferase 1, mitochondrial
At1g50200	ALATS	Alanine--tRNA ligase
At5g22800	EMB86	Alanine--tRNA ligase, chloroplastic/mitochondrial
At1g29250	At1g29250	Alba DNA/RNA-binding protein
At1g76010	At1g76010	Alba DNA/RNA-binding protein
At1g20220	At1g20220	Alba DNA/RNA-binding protein
At5g43940	ADH2	Alcohol dehydrogenase class-3
At1g77120	ADH1	Alcohol dehydrogenase class-P
At3g48000	ALDH2B4	Aldehyde dehydrogenase family 2 member B4, mitochondrial
At3g24503	ALDH2C4	Aldehyde dehydrogenase family 2 member C4
At2g37760	AKR4C8	Aldo-keto reductase family 4 member C8
At3g17940	At3g17940	Aldose 1-epimerase
At2g02470	AL6	Alfin-like 6
At4g29680	At4g29680	Alkaline-phosphatase-like family protein
At3g25770	AOC2	Allene oxide cyclase 2, chloroplastic
At3g52720	ACA1	Alpha carbonic anhydrase 1, chloroplastic
At3g23640	MDB19.14	Alpha glucosidase-like protein
At1g69830	AMY3	Alpha-amylase 3, chloroplastic
At5g08380	AGAL1	Alpha-galactosidase 1
At5g08370	AGAL2	Alpha-galactosidase 2
At3g46970	PHS2	Alpha-glucan phosphorylase 2, cytosolic
At1g10760	GWD1	Alpha-glucan water dikinase 1, chloroplastic
At4g34260	FUC95A	Alpha-L-fucosidase 2
At3g26720	At3g26720	Alpha-mannosidase At3g26720
At5g13690	CYL1	Alpha-N-acetylglucosaminidase family / NAGLU family
At1g68020	TPS6	Alpha,alpha-trehalose-phosphate synthase [UDP-forming] 6
At3g24420	At3g24420	Alpha/beta-Hydrolases superfamily protein
At5g36210	MAB16.20	Alpha/beta-Hydrolases superfamily protein
At2g24280	At2g24280	Alpha/beta-Hydrolases superfamily protein
At5g19140	AILP1	Aluminum induced protein with YGL and LRDR motifs
At3g22850	At3g22850	Aluminum induced protein with YGL and LRDR motifs
At5g07360	At5g07360	Amidase family protein
At1g31690	At1g31690	Amine oxidase
At4g12290	At4g12290	Amine oxidase
At3g20720	At3g20720	Amino-terminal region of chorein
At5g54060	A3G2XYLT	Anthocyanidin 3-O-glucoside 2'''-O-xylosyltransferase
At3g50270	F11C1_110	Anthranilate N-hydroxycinnamoyl/benzoyltransferase-like protein
At5g67150	At5g67150	Anthranilate N-hydroxycinnamoyl/benzoyltransferase-like protein
At1g28680	At1g28680	Anthranilate N-hydroxycinnamoyl/benzoyltransferase, putative
At4g26370	M3E9.200	Antitermination NusB domain-containing protein
At5g22770	ALPHA-ADR	AP-2 complex subunit alpha-1
At5g22780	ALPHAC-AD	AP-2 complex subunit alpha-2
At1g31730	At1g31730	AP-4 complex subunit epsilon
At4g24550	AP4M	AP-4 complex subunit mu
At3g53420	PIP2-1	Aquaporin PIP2-1
At1g26761	At1g26761	Arabinanase/levansucrase/invertase
At4g08900	ARGAH1	Arginase 1, mitochondrial
At4g08870	ARGAH2	Arginase 2, chloroplastic/mitochondrial
At5g51410	gene1500	Arginine-aspartate-rich RNA binding protein-like
At1g23180	At1g23180	ARM repeat superfamily protein
At5g14790	At5g14790	ARM repeat superfamily protein
At4g30990	At4g30990	ARM repeat superfamily protein
At5g66200	ARO2	Armadillo repeat only 2
At2g27820	ADT3	Arogenate dehydratase 3, chloroplastic
At1g15710	TYRAAT2	Arogenate dehydrogenase 2, chloroplastic
At5g65010	ASN2	Asparagine synthetase [glutamine-hydrolyzing] 2
At5g56680	SYNC1	Asparagine--tRNA ligase, cytoplasmic 1
At1g70980	SYNC3	Asparagine--tRNA ligase, cytoplasmic 3
At4g31990	ASP5	Aspartate aminotransferase, chloroplastic
At5g19550	ASP2	Aspartate aminotransferase, cytoplasmic isozyme 1
At2g30970	ASP1	Aspartate aminotransferase, mitochondrial
At3g20330	PYRB	Aspartate carbamoyltransferase, chloroplastic
At4g26870	At4g26870	Aspartate--tRNA ligase 1, cytoplasmic
At4g31180	IBI1	Aspartate--tRNA ligase 2, cytoplasmic
At4g33760	At4g33760	Aspartate--tRNA ligase, chloroplastic/mitochondrial
At1g11910	APA1	Aspartic proteinase A1
At3g12700	NANA	Aspartic proteinase NANA, chloroplast
At5g13280	AK1	Aspartokinase 1, chloroplastic
At5g14060	AK2	Aspartokinase 2, chloroplastic
At5g10760	AED1	Aspartyl protease AED1
At1g01300	APF2	Aspartyl protease family protein 2
At5g10770	At5g10770	Aspartyl protease family protein At5g10770
At5g04590	SIR	Assimilatory sulfite reductase (ferredoxin), chloroplastic
At3g04590	AHL14	AT-hook motif nuclear-localized protein 14
At1g01800	At1g01800	AT1G01800 protein
At1g07750	At1g07750	At1g07750/F24B9_13
At1g13730	At1g13730	At1g13730
At1g18070	At1g18070	At1g18070
At1g19690	At1g19690	At1g19690
At1g43690	At1g43690	At1g43690/F2J6_4
At1g44820	At1g44820	At1g44820
At1g49750	At1g49750	AT1G49750 protein
At1g52730	At1g52730	AT1G52730 protein
At1g63660	At1g63660	At1g63660
At1g69250	F23O10.17	At1g69250
At1g73110	At1g73110	At1g73110/F3N23_39
At1g75300	At1g75300	At1g75300
At1g78460	T30F21.20	AT1G78460 protein
At1g79720	At1g79720	At1g79720
At2g12550	NUB1	At2g12550
At2g20330	At2g20330	At2g20330/F11A3.12
At2g25950	At2g25950	At2g25950
At2g30720	At2g30720	At2g30720
At2g30880	SWAP70	At2g30880/F7F1.9
At2g32090	At2g32090	At2g32090/F22D22.16
At2g33600	CRL2	At2g33600
At2g35830	At2g35830	At2g35830/F11F19.26
At2g41380	At2g41380	At2g41380
At2g41800	At2g41800	At2g41800/T11A7.10
At2g47960	At2g47960	At2g47960/T9J23.10
At3g04650	At3g04650	AT3g04650/F7O18_13
At3g05090	LRS1	AT3g05090/T12H1_5
At3g07720	F17A17.6	AT3g07720/F17A17_6
At3g08780	At3g08780	AT3g08780/F17O14_25
At3g12080	emb2738	At3g12080
At3g15090	At3g15090	AT3g15090/K15M2_24
At3g16760	At3g16760	At3g16760
At3g17770	At3g17770	At3g17770
At3g20680	At3g20680	AT3g20680/F3H11_7
At3g21215	At3g21215	AT3G21215 protein
At3g22120	CWLP	At3g22120
At3g25150	At3g25150	AT3g25150/MJL12_9
At3g27570	At3g27570	AT3g27570/MMJ24_12
At3g28220	At3g28220	AT3g28220/T19D11_3
At3g44100	F26G5_50	At3g44100
At3g44190	F26G5_140	At3g44190
At3g52500	F22O6_120	At3g52500
At3g53950	F5K20_250	AT3g53950/F5K20_250
At3g54440	At3g54440	At3g54435
At3g55760	At3g55760	At3g55760
At3g57000	F24I3.80	At3g57000
At4g01700	At4g01700	At4g01700
At4g01897	At4g01897	At4g01897
At4g03150	At4g03150	AT4g03150/F4C21_7
At4g12880	AtENODL19	At4g12880
At4g13180	At4g13180	AT4g13180/F17N18_70
At4g17370	At4g17370	At4g17370
At4g21580	F18E5.200	AT4g21580/F18E5_200
At4g22010	sks4	At4g22010
At4g23670	At4g23670	AT4G23670 protein
At4g25680	At4g25680	At4g25680
At4g26700	FIM1	AT4G26700 protein
At4g28030	At4g28030	AT4G28030 protein
At4g28355	At4g28355	At4g28360
At4g31930	At4g31930	AT4g31930/F10N7_260
At4g32050	At4g32050	At4g32050
At4g32960	At4g32960	At4g32960
At4g33480	At4g33480	At4g33480
At4g34412	At4g34412	At4g34412
At4g35360	At4g35360	At4g35360/F23E12_80
At4g36190	At4g36190	At4g36190
At5g02130	NDP1	At5g02130
At5g05480	MOP10.2	AT5g05480/MOP10_2
At5g08410	FTRA2	At5g08410
At5g10730	MAJ23.90	AT5g10730/MAJ23_90
At5g11580	At5g11580	AT5g11580/F15N18_170
At5g11720	At5g11720	AT5g11720/T22P22_110
At5g11810	T22P22_200	At5g11810
At5g16040	At5g16040	At5g16040
At5g17000	At5g17000	AT5g16970/F2K13_120
At5g17440	At5g17440	AT5g17440/K3M16_10
At5g19440	At5g19440	At5g19440
At5g41870	At5g41870	At5g41870
At5g42470	MDH9.17	At5g42470
At5g44730	T19K24.16	At5g44730
At5g45170	At5g45170	At5g45170
At5g48370	At5g48370	At5g48370
At5g49760	LRR-RLK	At5g49760
At5g54760	MBG8.2;At4g27130	At5g54760;Protein translation factor SUI1 homolog 1
At5g55530	MTE17.25	At5g55530
At5g57040	MHM17.18	At5g57040
At5g58370	MCK7.24	AT5G58370 protein
At5g60160	At5g60160	AT5g60160/f15l12_20
At5g65760	MPA24.11	At5g65760
At1g58080	HISN1A	ATP phosphoribosyltransferase 1, chloroplastic
At1g09795	HISN1B	ATP phosphoribosyltransferase 2, chloroplastic
AtCg00470	atpE	ATP synthase epsilon chain, chloroplastic
At4g04640	ATPC1	ATP synthase gamma chain 1, chloroplastic
At1g51650	At1g51650	ATP synthase subunit epsilon, mitochondrial
At2g33040	ATPC	ATP synthase subunit gamma, mitochondrial
At2g22480	PFK5	ATP-dependent 6-phosphofructokinase 5, chloroplastic
At5g56630	PFK7	ATP-dependent 6-phosphofructokinase 7
At4g25370	CLPT1	ATP-dependent Clp protease ATP-binding subunit CLPT1, chloroplastic
At4g12060	CLPT2	ATP-dependent Clp protease ATP-binding subunit CLPT2, chloroplastic
At5g45390	CLPP4	ATP-dependent Clp protease proteolytic subunit 4, chloroplastic
At1g02560	CLPP5	ATP-dependent Clp protease proteolytic subunit 5, chloroplastic
At1g12410	CLPR2	ATP-dependent Clp protease proteolytic subunit-related protein 2, chloroplastic
At1g75460	At1g75460	ATP-dependent protease La (LON) domain protein
At1g01910	GET3A	ATPase GET3A
At5g17290	ATG5	Autophagy protein 5
At5g13360	At5g13360	Auxin reponsive-like protein
At4g02980	ERABP1	Auxin-binding protein 1
At3g51780	BAG4	BAG family molecular chaperone regulator 4
At2g34810	At2g34810	Berberine bridge enzyme-like 16
At4g20840	At4g20840	Berberine bridge enzyme-like 21
At5g44390	At5g44390	Berberine bridge enzyme-like 25
At5g44400	At5g44400	Berberine bridge enzyme-like 26
At5g44410	At5g44410	Berberine bridge enzyme-like 27
At5g14740	BCA2	Beta carbonic anhydrase 2, chloroplastic
At5g42100	BG_PPAP	Beta-1,3-glucanase
At4g11380	BETAB-AD	Beta-adaptin-like protein B
At4g17090	BAM3	Beta-amylase 3, chloroplastic
At5g20950	At5g20950	Beta-D-glucan exohydrolase-like protein
At1g52400	BGLU18	Beta-D-glucopyranosyl abscisate beta-glucosidase
At5g11920	CWINV6	Beta-fructofuranosidase, insoluble isoenzyme CWINV6
At2g28470	BGAL8	Beta-galactosidase
At4g36360	BGAL3	Beta-galactosidase 3
At5g63800	BGAL6	Beta-galactosidase 6
At2g32810	BGAL9	Beta-galactosidase 9
At3g09260	BGLU23	Beta-glucosidase 23
At2g32860	BGLU33	Beta-glucosidase 33
At3g18080	BGLU44	Beta-glucosidase 44
At3g62750	BGLU8	Beta-glucosidase 8
At3g55260	HEXO1	Beta-hexosaminidase 1
At1g74920	ALDH10A8	Betaine aldehyde dehydrogenase 1, chloroplastic
At3g06350	EMB3004	Bifunctional 3-dehydroquinate dehydratase/shikimate dehydrogenase, chloroplastic
At2g16370	THY-1	Bifunctional dihydrofolate reductase-thymidylate synthase 1
At1g63000	NRS/ER	Bifunctional dTDP-4-dehydrorhamnose 3,5-epimerase/dTDP-4-dehydrorhamnose reductase
At3g61440	CYSC1	Bifunctional L-3-cyanoalanine synthase/cysteine synthase C1, mitochondrial
At3g04940	CYSD1	Bifunctional L-3-cyanoalanine synthase/cysteine synthase D1
At5g28020	CYSD2	Bifunctional L-3-cyanoalanine synthase/cysteine synthase D2
At1g75380	BBD1	Bifunctional nuclease 1
At3g12290	FOLD2	Bifunctional protein FolD 2
At5g34850	PAP26	Bifunctional purple acid phosphatase 26
At5g47690	At5g47690	Binding protein
At2g43360	BIO2	Biotin synthase, mitochondrial
At3g49680	BCAT3	Branched-chain-amino-acid aminotransferase
At5g65780	BCAT5	Branched-chain-amino-acid aminotransferase 5, chloroplastic
At4g11560	At4g11560	Bromo-adjacent homology (BAH) domain-containing protein
At5g25610	RD22	BURP domain protein RD22
At4g34050	CCOAOMT1	Caffeoyl-CoA O-methyltransferase 1
At1g52760	CSE	Caffeoylshikimate esterase
At2g44310	At2g44310	Calcium-binding EF-hand family protein
At4g23650	CPK3	Calcium-dependent protein kinase 3
At4g35310	CPK5	Calcium-dependent protein kinase 5
At1g56340	CRT1	Calreticulin-1
At1g09210	CRT2	Calreticulin-2
At1g08450	CRT3	Calreticulin-3
At2g47400	CP12-1	Calvin cycle protein CP12-1, chloroplastic
At3g62410	CP12-2	Calvin cycle protein CP12-2, chloroplastic
At1g29900	CARB	Carbamoyl-phosphate synthase large chain, chloroplastic
At3g27740	CARA	Carbamoyl-phosphate synthase small chain, chloroplastic
At5g01260	At5g01260	Carbohydrate-binding-like fold
At3g18500	CCR4-3	Carbon catabolite repressor protein 4 homolog 3
At5g16940	At5g16940	Carbon-sulfur lyase
At5g46390	CTPA1	Carboxyl-terminal-processing peptidase 1, chloroplastic
At2g19470	CKL5	Casein kinase 1-like protein 5
At1g02305	CATHB2	Cathepsin B-like protease 2
At4g01610	CATHB3	Cathepsin B-like protease 3
At3g09840	CDC48A	Cell division control protein 48 homolog A
At2g45770	CPFTSY	Cell division protein FtsY homolog, chloroplastic
At5g06110	At5g06110	Cell division related protein-like
At5g64620	C/VIF2	Cell wall / vacuolar inhibitor of fructosidase 2
At3g55120	CHI1	Chalcone--flavonone isomerase 1
At5g15450	CLPB3	Chaperone protein ClpB3, chloroplastic
At5g64400	MSJ1.24	CHCH domain protein
At1g05850	CTL1	Chitinase-like protein 1
At5g40890	CLC-A	Chloride channel protein CLC-a
At5g04900	NOL	Chlorophyll(ide) b reductase NOL, chloroplastic
At1g67840	CSK	Chloroplast sensor kinase, chloroplastic
At3g29200	CM1	Chorismate mutase 1, chloroplastic
At1g48850	EMB1144	Chorismate synthase, chloroplastic
At2g28290	SYD	Chromatin structure-remodeling complex protein SYD
At3g19450	CAD4	Cinnamyl alcohol dehydrogenase 4
At4g34230	CAD5	Cinnamyl alcohol dehydrogenase 5
At4g37980	CAD7	Cinnamyl alcohol dehydrogenase 7
At4g19810	ChiC	Class V chitinase
At2g20790	At2g20790	Clathrin adaptor complexes medium subunit family protein
At2g43160	EPSIN2	Clathrin interactor EPSIN 2
At2g03390	CLPF	Clp protease adapter protein ClpF, chloroplastic
At5g53350	CLPX1	CLP protease regulatory subunit CLPX1, mitochondrial
At3g52140	NOXY38	Clustered mitochondria protein homolog
At1g20160	CRSP	CO(2)-response secreted protease
At5g05010	At5g05010	Coatomer subunit delta
At4g09520	At4g09520	Cofactor-independent phosphoglycerate mutase
At4g36020	CSP1;CSDP1	Cold shock protein 1;Cold shock domain protein 1
At4g24840	COG2	Conserved oligomeric Golgi complex subunit 2
At5g37190	CIP4	COP1-interacting protein 4
At5g42970	CSN4	COP9 signalosome complex subunit 4
At4g14110	CSN8	COP9 signalosome complex subunit 8
At1g12520	CCS	Copper chaperone for superoxide dismutase, chloroplastic/cytosolic
At4g33640	At4g33640	Costars family protein At4g33640
At1g03940	3AT1	Coumaroyl-CoA:anthocyanidin 3-O-glucoside-6''-O-coumaroyltransferase 1
At5g41770	At5g41770	Crooked neck protein, putative / cell cycle protein
At4g15430	At4g15430	CSC1-like protein At4g15430
At4g02120	At4g02120	CTP synthase
At3g12670	T2E22.2	CTP synthase
At4g35220	CYCLASE2	Cyclase-like protein 2
At4g18930	At4g18930	Cyclic phosphodiesterase
At3g57050	At3g57050	Cystathionine beta-lyase, chloroplastic
At3g01120	CGS1	Cystathionine gamma-synthase 1, chloroplastic
At1g08490	NFS2	Cysteine desulfurase 1, chloroplastic
At5g65720	NIFS1	Cysteine desulfurase, mitochondrial
At4g39090	RD19A	Cysteine protease RD19A
At3g59760	OASC	Cysteine synthase
At4g14880	OASA1	Cysteine synthase 1
At4g23250	EMB1290	Cysteine-rich receptor-like protein kinase 17
At5g48540	CRRSP55	Cysteine-rich repeat secretory protein 55
At4g23260	CRK18	Cysteine-rich RLK (RECEPTOR-like protein kinase) 18
At4g04570	CRK40	Cysteine-rich RLK (RECEPTOR-like protein kinase) 40
At4g23600	CORI3	Cystine lyase CORI3
At3g15640	COX5B-1	Cytochrome c oxidase subunit 5b-1, mitochondrial
At2g40890	CYP98A3	Cytochrome P450 98A3
At5g21482	CKX7	Cytokinin dehydrogenase 7
At5g50960	NBP35	Cytosolic Fe-S cluster assembly factor NBP35
At1g65930	CICDH	Cytosolic isocitrate dehydrogenase [NADP]
At1g18590	SOT17	Cytosolic sulfotransferase 17
At1g74090	SOT18	Cytosolic sulfotransferase 18
At1g17745	PGDH2	D-3-phosphoglycerate dehydrogenase 2, chloroplastic
At3g08840	At3g08840	D-alanine-D-alanine ligase family
At2g45630	At2g45630	D-isomer specific 2-hydroxyacid dehydrogenase family protein
At2g17340	At2g17340	Damage-control phosphatase At2g17340
At1g45230	At1g45230	DCL protein (DUF3223)
At1g55150	RH20	DEAD-box ATP-dependent RNA helicase 20
At2g47330	RH24	DEAD-box ATP-dependent RNA helicase 24
At5g26742	RH3	DEAD-box ATP-dependent RNA helicase 3, chloroplastic
At3g53110	RH38	DEAD-box ATP-dependent RNA helicase 38
At1g31970	RH5	DEAD-box ATP-dependent RNA helicase 5
At1g54410	HIRD11	Dehydrin HIRD11
At5g58770	At5g58770	Dehydrodolichyl diphosphate synthase 2
At4g26630	DEK3	DEK domain-containing chromatin associated protein
At3g58180	At3g58180	Deoxyhypusine hydroxylase
At1g17470	DRG1	Developmentally-regulated G-protein 1
At4g39520	DRG3	Developmentally-regulated G-protein 3
At1g59760	MTR4	DExH-box ATP-dependent RNA helicase DExH9
At2g20900	DGK5	Diacylglycerol kinase 5
At3g14390	LYSA1	Diaminopimelate decarboxylase 1, chloroplastic
At5g11880	LYSA2	Diaminopimelate decarboxylase 2, chloroplastic
At3g53580	DAPF	Diaminopimelate epimerase, chloroplastic
At5g41480	DHFS	Dihydrofolate synthetase
At3g25860	LTA2	Dihydrolipoyllysine-residue acetyltransferase component 4 of pyruvate dehydrogenase complex, chloroplastic
At1g34430	EMB3003	Dihydrolipoyllysine-residue acetyltransferase component 5 of pyruvate dehydrogenase complex, chloroplastic
At5g55070	At5g55070	Dihydrolipoyllysine-residue succinyltransferase component of 2-oxoglutarate dehydrogenase complex 1, mitochondrial
At4g26910	At4g26910	Dihydrolipoyllysine-residue succinyltransferase component of 2-oxoglutarate dehydrogenase complex 2, mitochondrial
At5g12200	PYD2	Dihydropyrimidinase
At1g62780	At1g62780	Dimethylallyl, adenosine tRNA methylthiotransferase
At1g55210	DIR20	Dirigent protein 20
At1g65870	DIR21	Dirigent protein 21
At4g16950	RPP5	Disease resistance protein (TIR-NBS-LRR class) family
At2g38860	DJ1E	DJ-1 protein homolog E
At3g54600	DJ1F	DJ-1 protein homolog F
At3g13940	At3g13940	DNA binding / DNA-directed RNA polymerase
At4g05420	DDB1A	DNA damage-binding protein 1a
At4g21100	DDB1B	DNA damage-binding protein 1b
At3g04880	DRT102	DNA damage-repair/toleration protein DRT102
At3g10690	GYRA	DNA gyrase subunit A, chloroplastic/mitochondrial
At2g07690	MCM5	DNA helicase
At3g11450	At3g11450	DnaJ and Myb-like DNA-binding domain-containing protein
At1g09700	DRB1	Double-stranded RNA-binding protein 1
At1g21680	At1g21680	DPP6 N-terminal domain-like protein
At1g55250	HUB2	E3 ubiquitin protein ligase
At1g55860	UPL1	E3 ubiquitin-protein ligase UPL1
At1g70320	UPL2	E3 ubiquitin-protein ligase UPL2
At4g38600	UPL3	E3 ubiquitin-protein ligase UPL3
At5g53870	ENODL1	Early nodulin-like protein 1
At4g27520	At4g27520	Early nodulin-like protein 2
At3g20290	EHD1	EH domain-containing protein 1
At1g50940	ETFA	Electron transfer flavoprotein subunit alpha, mitochondrial
At1g33780	At1g33780	Electron transporter, putative (DUF179)
At1g07940	A1	Elongation factor 1-alpha 1
At1g30230	At1g30230	Elongation factor 1-delta 1
At1g62750	CPEFG	Elongation factor G, chloroplastic
At4g33810	XYN5	Endo-1,4-beta-xylanase 5
At2g43580	At2g43580	Endochitinase At2g43580
At2g43590	At2g43590	Endochitinase At2g43590
At3g54420	EP3	Endochitinase EP3
At4g21590	ENDO3	Endonuclease 3
At4g21585	ENDO4	Endonuclease 4
At3g04480	At3g04480	Endoribonuclease
At3g45770	At3g45770	Enoyl-[acyl-carrier-protein] reductase, mitochondrial
At2g21280	GC1	Epimerase family protein SDR39U1 homolog, chloroplastic
At3g51330	At3g51330	Eukaryotic aspartyl protease family protein
At1g77480	At1g77480	Eukaryotic aspartyl protease family protein
At3g61820	F15G16.210	Eukaryotic aspartyl protease family protein
At3g25700	At3g25700	Eukaryotic aspartyl protease family protein
At1g72730	TIF4A-3	Eukaryotic initiation factor 4A-3
At5g47880	ERF1-1	Eukaryotic peptide chain release factor subunit 1-1
At1g12920	ERF1-2	Eukaryotic peptide chain release factor subunit 1-2
At3g26618	ERF1-3	Eukaryotic peptide chain release factor subunit 1-3
At1g76810	At1g76810	Eukaryotic translation initiation factor 2 (eIF-2) family protein
At4g33250	TIF3K1	Eukaryotic translation initiation factor 3 subunit K
At4g38710	EIF4B3	Eukaryotic translation initiation factor 4B3
At1g13950	ELF5A-1	Eukaryotic translation initiation factor 5A-1
At1g73180	At1g73180	Eukaryotic translation initiation factor eIF2A family protein
At5g59730	EXO70H7	Exocyst subunit Exo70 family protein
At1g69530	EXPA1	Expansin-A1
At2g39700	EXPA4	Expansin-A4
At3g11800	At3g11800	Expp1 protein
At2g21385	At2g21385	Expressed protein
At2g17030	SKIP23	F-box protein SKIP23
At1g04850	F13M7.16	F13M7.16 protein
At1g20370	At1g20370	F14O10.3 protein
At3g08030	F17A17.37	F17A17.37 protein
At1g64500	At1g64500	F1N19.7
At1g17210	ARABIDOPSIS IAP-LIKE PROTEIN	F20D23.9 protein
At1g34220	At1g34220	F23M19.10
At1g15470	At1g15470	F9L1.42 protein
At1g15140	At1g15140	F9L1.8 protein
At1g15910	FDM1	Factor of DNA methylation 1
At5g67290	At5g67290	FAD-dependent oxidoreductase family protein
At2g35660	CTF2A	FAD/NAD(P)-binding oxidoreductase family protein
At4g30720	PDE327	FAD/NAD(P)-binding oxidoreductase family protein
At3g44860	FAMT	Farnesoic acid carboxyl-O-methyltransferase
At5g47770	FPS1	Farnesyl pyrophosphate synthase 1, mitochondrial
At3g11700	FLA18	Fasciclin-like arabinogalactan protein 18
At3g46550	FLA4	Fasciclin-like arabinogalactan protein 4
At5g63560	FACT	Fatty alcohol:caffeoyl-CoA acyltransferase
At3g24430	HCF101	Fe-S cluster assembly factor HCF101, chloroplastic
At2g27190	PAP12	Fe(3+)-Zn(2+) purple acid phosphatase 12
At4g14890	FDC1	Ferredoxin C 1, chloroplastic
At5g66190	LFNR1	Ferredoxin--NADP reductase, leaf isozyme 1, chloroplastic
At1g30510	RFNR2	Ferredoxin--NADP reductase, root isozyme 2, chloroplastic
At5g04140	GLU1	Ferredoxin-dependent glutamate synthase 1, chloroplastic/mitochondrial
At3g56090	FER3	Ferritin-3, chloroplastic
At4g30310	At4g30310	FGGY family of carbohydrate kinase
At5g35700	FIM5	Fimbrin-5
At1g65860	FMOGS-OX1	Flavin-containing monooxygenase FMO GS-OX1
At1g62560	FMOGS-OX3	Flavin-containing monooxygenase FMO GS-OX3
At1g12140	FMOGS-OX5	Flavin-containing monooxygenase FMO GS-OX5
At5g17050	UGT78D2	Flavonol 3-O-glucosyltransferase
At5g08640	FLS1	Flavonol synthase/flavanone 3-hydroxylase
At1g30530	UGT78D1	Flavonol-3-O-rhamnosyltransferase
At2g40070	Basic Proline-rich Protein 1	Flocculation FLO11-like protein
At1g78680	GGH2	Folate gamma-glutamyl hydrolase
At5g05980	FPGS1	Folylpolyglutamate synthase
At3g10160	FPGS2	Folylpolyglutamate synthase
At1g50480	THFS	Formate--tetrahydrofolate ligase
At2g21330	FBA1	Fructose-bisphosphate aldolase 1, chloroplastic
At4g38970	FBA2	Fructose-bisphosphate aldolase 2, chloroplastic
At2g01140	FBA3	Fructose-bisphosphate aldolase 3, chloroplastic
At4g26530	FBA5	Fructose-bisphosphate aldolase 5, cytosolic
At2g47510	FUM1	Fumarate hydratase 1, mitochondrial
At5g50950	FUM2	Fumarate hydratase 2
At1g12050	FAH	Fumarylacetoacetase
At3g10700	GALAK	Galacturonokinase
At4g30530	GGP1	Gamma-glutamyl peptidase 1
At5g28840	At5g28840	GDP-mannose 3,5-epimerase
At3g16370	APG	GDSL esterase/lipase APG
At1g09390	At1g09390	GDSL esterase/lipase At1g09390
At1g28570	At1g28570	GDSL esterase/lipase At1g28570
At1g28580	At1g28580	GDSL esterase/lipase At1g28580
At1g28600	At1g28600	GDSL esterase/lipase At1g28600
At1g28610	At1g28610	GDSL esterase/lipase At1g28610
At1g28660	At1g28660	GDSL esterase/lipase At1g28660
At1g28670	At1g28670	GDSL esterase/lipase At1g28670
At1g31550	At1g31550	GDSL esterase/lipase At1g31550
At1g54790	At1g54790	GDSL esterase/lipase At1g54790
At2g03980	At2g03980	GDSL esterase/lipase At2g03980
At2g27360	At2g27360	GDSL esterase/lipase At2g27360
At3g05180	At3g05180	GDSL esterase/lipase At3g05180
At3g48460	At3g48460	GDSL esterase/lipase At3g48460
At4g01130	At4g01130	GDSL esterase/lipase At4g01130
At5g14450	At5g14450	GDSL esterase/lipase At5g14450
At5g45950	At5g45950	GDSL esterase/lipase At5g45950
At5g62930	At5g62930	GDSL esterase/lipase At5g62930
At2g42590	GRF9	General regulatory factor 9
At1g74470	CHLP	Geranylgeranyl diphosphate reductase, chloroplastic
At5g12210	RGTB1	Geranylgeranyl transferase type-2 subunit beta 1
At3g05950	At3g05950	Germin-like protein subfamily 1 member 7
At1g72610	GLP1	Germin-like protein subfamily 3 member 1
At5g20630	GER3	Germin-like protein subfamily 3 member 3
At1g66250	At1g66250	Glucan endo-1,3-beta-glucosidase 2
At3g13560	At3g13560	Glucan endo-1,3-beta-glucosidase 4
At4g31140	At4g31140	Glucan endo-1,3-beta-glucosidase 5
At4g34480	At4g34480	Glucan endo-1,3-beta-glucosidase 7
At5g58480	At5g58480	Glucan endo-1,3-beta-glucosidase 9
At5g15770	GNA1	Glucosamine 6-phosphate N-acetyltransferase
At4g39210	APL3	Glucose-1-phosphate adenylyltransferase large subunit 3, chloroplastic
At3g27300	G6PD5	Glucose-6-phosphate 1-dehydrogenase 5, cytoplasmic
At4g23730	At4g23730	Glucose-6-phosphate 1-epimerase
At4g25900	At4g25900	Glucose-6-phosphate 1-epimerase
At2g13440	At2g13440	Glucose-inhibited division family A protein
At5g56360	PSL4	Glucosidase 2 subunit beta
At5g17330	GAD1	Glutamate decarboxylase 1
At5g53460	GLT1	Glutamate synthase 1 [NADH], chloroplastic
At5g26710	At5g26710	Glutamate--tRNA ligase, cytoplasmic
At3g48730	GSA2	Glutamate-1-semialdehyde 2,1-aminomutase 2, chloroplastic
At5g16570	GLN1-4	Glutamine synthetase cytosolic isozyme 1-4
At5g35630	GLN2	Glutamine synthetase, chloroplastic/mitochondrial
At1g55090	At1g55090	Glutamine-dependent NAD(+) synthetase
At1g58290	HEMA1	Glutamyl-tRNA reductase 1, chloroplastic
At3g21200	GLUTRBP	Glutamyl-tRNA reductase-binding protein, chloroplastic
At3g25660	GATA	Glutamyl-tRNA(Gln) amidotransferase subunit A, chloroplastic/mitochondrial
At1g48520	GATB	Glutamyl-tRNA(Gln) amidotransferase subunit B, chloroplastic/mitochondrial
At5g40370	GRXC2	Glutaredoxin-C2
At5g20500	GRXC4	Glutaredoxin-C4
At4g29210	GGT3	Glutathione hydrolase 3
At3g24170	At3g24170	Glutathione reductase, cytosolic
At1g75270	DHAR2	Glutathione S-transferase DHAR2
At2g30870	GSTF10	Glutathione S-transferase F10
At5g17220	GSTF12	Glutathione S-transferase F12
At2g30860	GSTF9	Glutathione S-transferase F9
At5g41210	GSTT1	Glutathione S-transferase T1
At1g27130	GSTU13	Glutathione S-transferase U13
At1g59700	GSTU16	Glutathione S-transferase U16
At1g10370	GSTU17	Glutathione S-transferase U17
At1g10360	GSTU18	Glutathione S-transferase U18
At1g78340	GSTU22	Glutathione S-transferase U22
At2g29450	GSTU5	Glutathione S-transferase U5
At2g29420	GSTU7	Glutathione S-transferase U7
At1g13440	GAPC2	Glyceraldehyde-3-phosphate dehydrogenase C2
At3g04120	GAPC1	Glyceraldehyde-3-phosphate dehydrogenase GAPC1, cytosolic
At4g38225	At4g38225	Glycerol kinase
At1g74210	GDPD5	Glycerophosphodiester phosphodiesterase GDPD5
At1g66970	GDPDL1	Glycerophosphodiester phosphodiesterase GDPDL1
At4g33010	GLDP1	Glycine dehydrogenase (decarboxylating) 1, mitochondrial
At2g26080	GLDP2	Glycine dehydrogenase (decarboxylating) 2, mitochondrial
At1g29880	At1g29880	Glycine--tRNA ligase, mitochondrial 1
At4g21620	At4g21620	Glycine-rich protein
At1g27090	At1g27090	Glycine-rich protein
At4g13850	RBG2	Glycine-rich RNA-binding protein 2, mitochondrial
At5g61030	RBG3	Glycine-rich RNA-binding protein 3, mitochondrial
At2g21660	RBG7	Glycine-rich RNA-binding protein 7
At4g39260	RBG8	Glycine-rich RNA-binding protein 8
At3g26420	RZ1A	Glycine-rich RNA-binding protein RZ1A
At2g33470	GLTP1	Glycolipid transfer protein 1
At5g04885	At5g04885	Glycosyl hydrolase family protein
At3g47010	At3g47010	Glycosyl hydrolase family protein
At5g63840	RSW3	Glycosyl hydrolases family 31 protein
At1g79870	HPR2	Glyoxylate/hydroxypyruvate reductase A HPR2
At3g25530	GLYR1	Glyoxylate/succinic semialdehyde reductase 1
At3g27530	GC6	Golgin candidate 6
At4g26780	Mge2	GrpE protein homolog 2, mitochondrial
At5g57960	MTI20.22	GTP binding protein-like
At2g22870	EMB2001	GTP-binding protein At2g22870
At5g66470	At5g66470	GTPase ERA-like, chloroplastic
At2g44100	GDI1	Guanosine nucleotide diphosphate dissociation inhibitor 1
At3g59920	GDI2	Guanosine nucleotide diphosphate dissociation inhibitor 2
At5g08180	At5g08180	H/ACA ribonucleoprotein complex subunit 2-like protein
At1g79790	FHY1	Haloacid dehalogenase-like hydrolase (HAD) superfamily protein
At2g33255	At2g33255	Haloacid dehalogenase-like hydrolase domain-containing protein At2g33255
At2g38740	SGPP	Haloacid dehalogenase-like hydrolase domain-containing protein Sgpp
At5g02500	HSP70-1;HSC70-1	Heat shock 70 kDa protein 1;Heat shock cognate protein 70-1
At5g09590	HSP70-10	Heat shock 70 kDa protein 10, mitochondrial
At1g79920	HSP70-15	Heat shock 70 kDa protein 15
At3g09440	HSP70-3	Heat shock 70 kDa protein 3
At4g37910	HSP70-9	Heat shock 70 kDa protein 9, mitochondrial
At4g16660	At4g16660	Heat shock protein 70 (Hsp 70) family protein
At5g07830	At5g07830	Heparanase-like protein 1
At5g34940	At5g34940	Heparanase-like protein 3
At4g36810	GGPPS1	Heterodimeric geranylgeranyl pyrophosphate synthase large subunit 1, chloroplastic
At4g38460	GGR	Heterodimeric geranylgeranyl pyrophosphate synthase small subunit, chloroplastic
At3g04720	HEL	Hevein-like preproprotein
At1g20693	HMGB2	High mobility group B protein 2
At1g20696	HMGB3	High mobility group B protein 3
At5g62630	HIPL2	HIPL2 protein
At3g10250	At3g10250	Histidine-tRNA ligase
At5g56740	HAG2	Histone acetyltransferase type B catalytic subunit
At5g61060	HDA5	Histone deacetylase 5
At5g22650	HDT2	Histone deacetylase HDT2
At1g06760	At1g06760	Histone H1.1
At2g30620	At2g30620	Histone H1.2
At5g22880	At5g22880	Histone H2B.10
At5g59910	At5g59910	Histone H2B.11
At2g28720	At2g28720	Histone H2B.3
At3g45980	H2B	Histone H2B.6
At3g21820	ATXR2	Histone-lysine N-methyltransferase ATXR2
At1g73100	SUVH3	Histone-lysine N-methyltransferase, H3 lysine-9 specific SUVH3
At3g48720	T8P19.230	HXXXD-type acyl-transferase family protein
At3g25690	CHUP1	Hydroxyproline-rich glycoprotein family protein
At5g56650	ILL1	IAA-amino acid hydrolase ILR1-like 1
At5g56660	ILL2	IAA-amino acid hydrolase ILR1-like 2
At1g51760	ILL4	IAA-amino acid hydrolase ILR1-like 4
At1g54030	MVP1	Inactive GDSL esterase/lipase-like protein 25
At1g21100	IGMT1	Indole glucosinolate O-methyltransferase 1
At1g21130	IGMT4	Indole glucosinolate O-methyltransferase 4
At1g76790	IGMT5	Indole glucosinolate O-methyltransferase 5
At3g43600	AAO2	Indole-3-acetaldehyde oxidase
At4g03400	GH3.10	Indole-3-acetic acid-amido synthetase GH3.10
At5g13370	GH3.15	Indole-3-acetic acid-amido synthetase GH3.15
At2g04400	IGPS	Indole-3-glycerol phosphate synthase, chloroplastic
At2g43980	ITPK4	Inositol 1,3,4-trisphosphate 5/6-kinase 4
At5g07370	IPK2a	Inositol polyphosphate multikinase alpha
At4g39800	IPS1	Inositol-3-phosphate synthase isozyme 1
At2g22240	IPS2	Inositol-3-phosphate synthase isozyme 2
At2g39930	ISA1	Isoamylase 1, chloroplastic
At1g03310	ISA2	Isoamylase 2, chloroplastic
At4g09020	ISA3	Isoamylase 3, chloroplastic
At5g08100	At5g08100	Isoaspartyl peptidase/L-asparaginase 1
At1g75280	At1g75280	Isoflavone reductase homolog P3
At5g16440	IPP1	Isopentenyl-diphosphate Delta-isomerase I, chloroplastic
At3g02780	IPP2	Isopentenyl-diphosphate Delta-isomerase II, chloroplastic
At3g16460	JAL34	Jacalin-related lectin 34
At1g52000	JAL5	Jacalin-related lectin 5
At3g58610	At3g58610	Ketol-acid reductoisomerase, chloroplastic
At2g40730	CTEXP	Kinase family with ARM repeat domain-containing protein
At5g10470	KIN14A	Kinesin-like protein KIN-14A
At1g59540	KIN7N	Kinesin-like protein KIN-7N
At5g21100	AAO	L-ascorbate oxidase
At1g07890	APX1	L-ascorbate peroxidase 1, cytosolic
At4g33670	LGALDH	L-galactose dehydrogenase
At2g37710	LECRK41	L-type lectin-domain containing receptor kinase IV.1
At4g32720	LA1	La protein 1
At5g46250	LARP6A	La-related protein 6A
At2g43970	LARP6B	La-related protein 6B
At1g11840	GLX1	Lactoylglutathione lyase GLX1
At5g03350	LLP	Lectin-like protein
At1g53070	At1g53070	Lectin-like protein At1g53070
At2g24200	LAP1	Leucine aminopeptidase 1
At1g09620	At1g09620	Leucine--tRNA ligase, cytoplasmic
At1g33590	At1g33590	Leucine-rich repeat (LRR) family protein
At2g19780	At2g19780	Leucine-rich repeat (LRR) family protein
At2g15320	At2g15320	Leucine-rich repeat (LRR) family protein
At4g13340	LRX3	Leucine-rich repeat extensin-like protein 3
At1g51805	At1g51805	Leucine-rich repeat protein kinase family protein
At5g51350	LRR-RLK	Leucine-rich repeat receptor-like protein kinase
At5g65700	BAM1	Leucine-rich repeat receptor-like serine/threonine-protein kinase BAM1
At1g56145	At1g56145	Leucine-rich repeat transmembrane protein kinase
At3g52430	PAD4	Lipase-like PAD4
At2g20860	LIP1	Lipoyl synthase, mitochondrial
At1g49430	LACS2	Long chain acyl-CoA synthetase 2
At1g64400	LACS3	Long chain acyl-CoA synthetase 3
At4g23850	LACS4	Long chain acyl-CoA synthetase 4
At5g52310	RD29A	Low-temperature-induced 78 kDa protein
At2g30105	At2g30105	LRR repeats and ubiquitin-like domain-containing protein At2g30105
At3g10230	LCY1	Lycopene beta cyclase, chloroplastic
At3g13490	OVA5	Lysine--tRNA ligase, chloroplastic/mitochondrial
At2g17120	LYM2	LysM domain-containing GPI-anchored protein 2
At4g25080	CHLM	Magnesium protoporphyrin IX methyltransferase, chloroplastic
At1g08520	CHLD	Magnesium-chelatase subunit ChlD, chloroplastic
At5g13630	CHLH	Magnesium-chelatase subunit ChlH, chloroplastic
At4g18480	CHLI1	Magnesium-chelatase subunit ChlI-1, chloroplastic
At5g45930	CHLI2	Magnesium-chelatase subunit ChlI-2, chloroplastic
At3g26450	At3g26450	Major latex protein, putative
At5g43330	MDH2	Malate dehydrogenase 2, cytoplasmic
At2g39770	CYT1	Mannose-1-phosphate guanylyltransferase 1
At3g02570	PMI1	Mannose-6-phosphate isomerase 1
At4g33540	At4g33540	Metallo-beta-lactamase family protein
At4g29490	At4g29490	Metallopeptidase M24 family protein
At2g45240	MAP1A	Methionine aminopeptidase 1A
At3g19710	BCAT4	Methionine aminotransferase BCAT4
At4g13780	At4g13780	Methionine--tRNA ligase, cytoplasmic
At3g59970	MTHFR1	Methylenetetrahydrofolate reductase 1
At3g50440	MES10	Methylesterase 10
At2g23600	MES2	Methylesterase 2
At2g23610	MES3	Methylesterase 3
At5g23010	MAM1	Methylthioalkylmalate synthase 1
At5g23020	MAM3	Methylthioalkylmalate synthase 3, chloroplastic
At1g49820	MTK	Methylthioribose kinase
At2g05830	At2g05830	Methylthioribose-1-phosphate isomerase
At4g01370	MPK4	Mitogen-activated protein kinase 4
At4g29810	MKK2	Mitogen-activated protein kinase kinase 2
At1g70890	MLP43	MLP-like protein 43
At5g44720	T19K24.17	Molybdenum cofactor sulfurase family protein
At5g20990	CNX1	Molybdopterin biosynthesis protein CNX1
At2g43760	MOCS2	Molybdopterin synthase catalytic subunit
At3g52880	MDAR1	Monodehydroascorbate reductase 1, peroxisomal
At5g03630	MDAR2	Monodehydroascorbate reductase 2
At3g27820	MDAR4	Monodehydroascorbate reductase 4, peroxisomal
At2g22450	RIBA2	Monofunctional riboflavin biosynthesis protein RIBA 2, chloroplastic
At3g54900	GRXS14	Monothiol glutaredoxin-S14, chloroplastic
At3g15660	GRXS15	Monothiol glutaredoxin-S15, mitochondrial
At4g04950	GRXS17	Monothiol glutaredoxin-S17
At1g04510	MAC3A	MOS4-associated complex 3A
At1g71040	LPR2	Multicopper oxidase LPR2
At1g22270	TRM112A	Multifunctional methyltransferase subunit TRM112 homolog A
At4g20020	MORF1	Multiple organellar RNA editing factor 1, mitochondrial
At1g52040	MBP1	Myrosinase-binding protein 1
At5g05590	PAI2	N-(5'-phosphoribosyl)anthranilate isomerase 2, chloroplastic
At5g13780	NAA10	N-terminal acetyltransferase A complex catalytic subunit NAA10
At4g04880	MAPDA	N6-mAMP deaminase
At4g00570	NAD-ME2	NAD-dependent malic enzyme 2, mitochondrial
At2g02400	At2g02400	NAD(P)-binding Rossmann-fold superfamily protein
At2g29320	At2g29320	NAD(P)-binding Rossmann-fold superfamily protein
At1g66130	At1g66130	NAD(P)-binding Rossmann-fold superfamily protein
At3g20790	At3g20790	NAD(P)-binding Rossmann-fold superfamily protein
At2g29310	At2g29310	NAD(P)-binding Rossmann-fold superfamily protein
At3g61220	SDR1	NAD(P)-binding Rossmann-fold superfamily protein
At1g66800	At1g66800	NAD(P)-binding Rossmann-fold superfamily protein
At4g00560	At4g00560	NAD(P)-binding Rossmann-fold superfamily protein
At2g33590	CRL1	NAD(P)-binding Rossmann-fold superfamily protein
At4g09750	At4g09750	NAD(P)-binding Rossmann-fold superfamily protein
At1g51410	At1g51410	NAD(P)-binding Rossmann-fold superfamily protein
At1g59960	At1g59960	NAD(P)-linked oxidoreductase superfamily protein
At2g21250	At2g21250	NAD(P)-linked oxidoreductase superfamily protein
AtCg00430	ndhK	NAD(P)H-quinone oxidoreductase subunit K, chloroplastic
At4g37925	ndhM	NAD(P)H-quinone oxidoreductase subunit M, chloroplastic
At4g34700	CIB22	NADH dehydrogenase [ubiquinone] 1 beta subcomplex subunit 9
At5g20080	CBR2	NADH-cytochrome b5 reductase-like protein
At5g16990	P2	NADP-dependent alkenal double bond reductase P2
At2g24270	ALDH11A3	NADP-dependent glyceraldehyde-3-phosphate dehydrogenase
At5g11670	NADP-ME2	NADP-dependent malic enzyme 2
At1g79750	NADP-ME4	NADP-dependent malic enzyme 4, chloroplastic
At4g30210	ATR2	NADPH--cytochrome P450 reductase
At3g03980	At3g03980	NADPH-dependent aldehyde reductase-like protein, chloroplastic
At2g37770	AKR4C9	NADPH-dependent aldo-keto reductase, chloroplastic
At5g16970	AER	NADPH-dependent oxidoreductase 2-alkenal reductase
At3g27890	NQR	NADPH:quinone oxidoreductase
At5g44520	MFC16.20	NagB/RpiA/CoA transferase-like superfamily protein
At1g74560	NRP1	NAP1-related protein 1
At3g51240	F3H	Naringenin,2-oxoglutarate 3-dioxygenase
At3g12390	At3g12390	Nascent polypeptide-associated complex subunit alpha-like protein 1
At3g49470	At3g49470	Nascent polypeptide-associated complex subunit alpha-like protein 2
At5g13850	At5g13850	Nascent polypeptide-associated complex subunit alpha-like protein 3
At2g38010	NCER2	Neutral ceramidase 2
At2g23420	NAPRT2	Nicotinate phosphoribosyltransferase
At4g36940	NAPRT1	Nicotinate phosphoribosyltransferase 1
At2g01350	QPT	Nicotinate-nucleotide pyrophosphorylase [carboxylating], chloroplastic
At1g51390	NIFU5	NifU-like protein 5, mitochondrial
At1g77760	NIA1	Nitrate reductase [NADH] 1
At1g37130	NIA2	Nitrate reductase [NADH] 2
At3g47450	NOA1	NO-associated protein 1, chloroplastic/mitochondrial
At3g10520	AHB2	Non-symbiotic hemoglobin 2
At1g16080	At1g16080	Nuclear protein
At5g47640	NFYB2	Nuclear transcription factor Y subunit B-2
At3g09250	At3g09250	Nuclear transport factor 2 (NTF2) family protein
At2g03640	At2g03640	Nuclear transport factor 2 (NTF2) family protein with RNA binding (RRM-RBD-RNP motifs) domain-containing protein
At1g27310	NTF2A	Nuclear transport factor 2A
At3g18580	At3g18580	Nucleic acid-binding, OB-fold-like protein
At1g12800	At1g12800	Nucleic acid-binding, OB-fold-like protein
At1g48920	NUCL1	Nucleolin 1
At4g11010	NDPK3	Nucleoside diphosphate kinase III, chloroplastic/mitochondrial
At4g23900	NDK4	Nucleoside diphosphate kinase IV, chloroplastic/mitochondrial
At2g19480	NAP1:2	Nucleosome assembly protein 12
At3g04600	At3g04600	Nucleotidylyl transferase superfamily protein
At5g20070	NUDT19	Nudix hydrolase 19, chloroplastic
At2g04450	NUDT6	Nudix hydrolase 6
At3g07320	F21O3.3	O-Glycosyl hydrolases family 17 protein
At1g30580	YchF1	Obg-like ATPase 1
At1g17370	UBP1B	Oligouridylate-binding protein 1B
At3g14100	UBP1C	Oligouridylate-binding protein 1C
At5g54580	ORRM2	Organelle RRM domain-containing protein 2, mitochondrial
At1g28120	OTU1	OVARIAN TUMOR DOMAIN-containing deubiquitinating enzyme 1
At4g36090	At4g36090	Oxidoreductase, 2OG-Fe(II) oxygenase family protein
At1g06680	PSBP1	Oxygen-evolving enhancer protein 2-1, chloroplastic
At4g05180	PSBQ2	Oxygen-evolving enhancer protein 3-2, chloroplastic
At1g06720	At1g06720	p-loop containing nucleoside triphosphate hydrolases superfamily protein
At5g48840	At5g48840	Pantoate--beta-alanine ligase
At5g54390	AHL	PAP-specific phosphatase HAL2-like
At2g14610	At2g14610	Pathogenesis-related protein 1
At1g75040	At1g75040	Pathogenesis-related protein 5
At4g38670	At4g38670	Pathogenesis-related thaumatin superfamily protein
At3g55140	At3g55140	Pectate lyase
At3g07010	At3g07010	Pectate lyase
At3g05910	PAE12	Pectin acetylesterase 12
At2g46930	PAE3	Pectin acetylesterase 3
At5g23870	PAE9	Pectin acetylesterase 9
At3g57790	At3g57790	Pectin lyase-like superfamily protein
At4g23500	At4g23500	Pectin lyase-like superfamily protein
At3g09540	At3g09540	Pectin lyase-like superfamily protein
At4g23820	F9D16.290	Pectin lyase-like superfamily protein
At3g49220	At3g49220	Pectinesterase
At1g12250	At1g12250	Pentapeptide repeat-containing protein
At1g26460	At1g26460	Pentatricopeptide repeat-containing protein At1g26460, mitochondrial
At1g73400	At1g73400	Pentatricopeptide repeat-containing protein At1g73400, mitochondrial
At3g49740	PCMP-E84	Pentatricopeptide repeat-containing protein At3g49740
At4g01990	At4g01990	Pentatricopeptide repeat-containing protein At4g01990, mitochondrial
At4g16390	P67	Pentatricopeptide repeat-containing protein At4g16390, chloroplastic
At4g35850	At4g35850	Pentatricopeptide repeat-containing protein At4g35850, mitochondrial
At4g38220	AQI	Peptidase M20/M25/M40 family protein
At3g62910	APG3	Peptide chain release factor APG3, chloroplastic
At5g36170	PRFB1	Peptide chain release factor PrfB1, chloroplastic
At1g15390	PDF1A	Peptide deformylase 1A, chloroplastic/mitochondrial
At5g07460	MRSA2	Peptide methionine sulfoxide reductase A2
At4g21850	MSRB9	Peptide methionine sulfoxide reductase B9
At3g14920	At3g14920	Peptide-N4-(N-acetyl-beta-glucosaminyl)asparagine amidase A protein
At3g01720	SERGT1	Peptidyl serine alpha-galactosyltransferase
At1g26550	T1K7.8	Peptidyl-prolyl cis-trans isomerase
At2g29960	CYP19-4	Peptidyl-prolyl cis-trans isomerase CYP19-4
At5g58710	CYP20-1	Peptidyl-prolyl cis-trans isomerase CYP20-1
At3g15520	CYP37	Peptidyl-prolyl cis-trans isomerase CYP37, chloroplastic
At3g01480	CYP38	Peptidyl-prolyl cis-trans isomerase CYP38, chloroplastic
At5g64350	FKBP12	Peptidyl-prolyl cis-trans isomerase FKBP12
At3g25220	FKBP15-1	Peptidyl-prolyl cis-trans isomerase FKBP15-1
At5g48580	FKBP15-2	Peptidyl-prolyl cis-trans isomerase FKBP15-2
At5g13410	FKBP19	Peptidyl-prolyl cis-trans isomerase FKBP19, chloroplastic
At4g25340	FKBP53	Peptidyl-prolyl cis-trans isomerase FKBP53
At3g25230	FKBP62	Peptidyl-prolyl cis-trans isomerase FKBP62
At4g26555	At4g26555	Peptidylprolyl isomerase
At1g71695	PER12	Peroxidase 12
At2g38390	PER23	Peroxidase 23
At1g05260	PER3	Peroxidase 3
At3g49120	PER34	Peroxidase 34
At4g21960	PER42	Peroxidase 42
At5g05340	PER52	Peroxidase 52
At5g06720	PER53	Peroxidase 53
At5g58390	PER67	Peroxidase 67
At5g43910	At5g43910	PfkB-like carbohydrate kinase family protein
At2g37040	PAL1	Phenylalanine ammonia-lyase 1
At3g53260	PAL2	Phenylalanine ammonia-lyase 2
At3g10340	PAL4	Phenylalanine ammonia-lyase 4
At1g72550	At1g72550	Phenylalanine--tRNA ligase beta subunit, cytoplasmic
At1g49340	ATPI4K ALPHA	Phosphatidylinositol 3-and 4-kinase family protein
At3g19420	PTEN2A	Phosphatidylinositol 3,4,5-trisphosphate 3-phosphatase and protein-tyrosine-phosphatase PTEN2A
At4g39980	DHS1	Phospho-2-dehydro-3-deoxyheptonate aldolase 1, chloroplastic
At5g03430	At5g03430	Phosphoadenosine phosphosulfate (PAPS) reductase family protein
At4g37870	PCKA	Phosphoenolpyruvate carboxykinase (ATP)
At2g42600	PPC2	Phosphoenolpyruvate carboxylase 2
At4g10750	T12H20.10	Phosphoenolpyruvate carboxylase family protein
At3g18000	NMT1	Phosphoethanolamine N-methyltransferase 1
At1g73600	NMT3	Phosphoethanolamine N-methyltransferase 3
At3g52180	DSP4	Phosphoglucan phosphatase DSP4, chloroplastic
At3g01510	LSF1	Phosphoglucan phosphatase LSF1, chloroplastic
At3g10940	LSF2	Phosphoglucan phosphatase LSF2, chloroplastic
At5g26570	GWD3	Phosphoglucan, water dikinase, chloroplastic
At3g12780	PGK1	Phosphoglycerate kinase 1, chloroplastic
At1g79550	PGK3	Phosphoglycerate kinase 3, cytosolic
At2g17280	PGM	Phosphoglycerate mutase-like protein
At5g64460	At5g64460	Phosphoglycerate mutase-like protein 1
At5g47760	PGLP2	Phosphoglycolate phosphatase 2
At3g51830	SAC8	Phosphoinositide phosphatase SAC8
At2g25080	GPX1	Phospholipid hydroperoxide glutathione peroxidase 1, chloroplastic
At2g45790	PMM	Phosphomannomutase
At1g48600	NMT2	Phosphomethylethanolamine N-methyltransferase
At2g29630	THIC	Phosphomethylpyrimidine synthase, chloroplastic
At1g31910	PMK	Phosphomevalonate kinase, peroxisomal
At1g12350	PPCS1	Phosphopantothenate--cysteine ligase 1
At4g24350	At4g24350	Phosphorylase superfamily protein
At4g35630	PSAT1	Phosphoserine aminotransferase 1, chloroplastic
At2g19860	HXK2	Phosphotransferase
At3g01440	PNSL3	Photosynthetic NDH subunit of lumenal location 3, chloroplastic
At1g15980	PNSB1	Photosynthetic NDH subunit of subcomplex B 1, chloroplastic
At1g64770	PNSB2	Photosynthetic NDH subunit of subcomplex B 2, chloroplastic
At3g55250	PSA3	Photosystem I assembly factor PSA3, chloroplastic
At4g02770	psaD1	Photosystem I reaction center subunit II-1, chloroplastic
At4g28750	PSAE1	Photosystem I reaction center subunit IV A, chloroplastic
At2g20260	PSAE2	Photosystem I reaction center subunit IV B, chloroplastic
At5g23120	HCF136	Photosystem II stability/assembly factor, chloroplast (HCF136)
At5g58140	PHOT2	Phototropin-2
At1g50370	FYPP1	Phytochrome-associated serine/threonine-protein phosphatase 1
At5g67130	At5g67130	PI-PLC X domain-containing protein At5g67130
At5g09760	At5g09760	Plant invertase/pectin methylesterase inhibitor superfamily
At5g62350	MMI9.21	Plant invertase/pectin methylesterase inhibitor superfamily protein
At5g21105	At5g21105	Plant L-ascorbate oxidase
At4g10790	PUX10	Plant UBX domain-containing protein 10
At2g43210	PUX11	Plant UBX domain-containing protein 11
At4g04210	PUX4	Plant UBX domain-containing protein 4
At2g45960	PIP1B	Plasma membrane intrinsic protein 1B
At4g36945	At4g36945	PLC-like phosphodiesterases superfamily protein
At4g17100	At4g17100	Poly(U)-specific endoribonuclease-B protein
At2g23350	PAB4	Polyadenylate-binding protein 4
At1g11650	RBP45B	Polyadenylate-binding protein RBP45B
At4g27000	RBP45C	Polyadenylate-binding protein RBP45C
At5g19350	RBP47B'	Polyadenylate-binding protein RBP47B'
At1g47490	RBP47C	Polyadenylate-binding protein RBP47C
At5g06860	PGIP1	Polygalacturonase inhibitor 1
At4g29060	PETs	Polyprotein of EF-Ts, chloroplastic
At2g33340	PRP19B	Pre-mRNA-processing factor 19 homolog 2
At1g62810	At1g62810	Primary amine oxidase
At3g08590	At3g08590	Probable 2,3-bisphosphoglycerate-independent phosphoglycerate mutase 2
At4g29120	At4g29120	Probable 3-hydroxyisobutyrate dehydrogenase-like 1, mitochondrial
At1g71170	At1g71170	Probable 3-hydroxyisobutyrate dehydrogenase-like 2, mitochondrial
At2g39020	At2g39020	Probable acetyltransferase NATA1-like
At4g17890	AGD8	Probable ADP-ribosylation factor GTPase-activating protein AGD8
At1g60730	At1g60730	Probable aldo-keto reductase 5
At5g13980	At5g13980	Probable alpha-mannosidase At5g13980
At5g61840	IRX10L	Probable beta-1,4-xylosyltransferase IRX10L
At3g19620	BXL5	Probable beta-D-xylosidase 5
At5g10560	BXL6	Probable beta-D-xylosidase 6
At1g78060	BXL7	Probable beta-D-xylosidase 7
At3g48690	CXE12	Probable carboxylesterase 12
At2g03550	CXE7	Probable carboxylesterase 7
At2g45600	CXE8	Probable carboxylesterase 8
At4g19170	CCD4	Probable carotenoid cleavage dioxygenase 4, chloroplastic
At5g05270	CHI3	Probable chalcone--flavonone isomerase 3
At4g16190	RD19C	Probable cysteine protease RD19C
At4g31790	At4g31790	Probable diphthine methyl ester synthase
At1g36730	At1g36730	Probable eukaryotic translation initiation factor 5-1
At1g77840	At1g77840	Probable eukaryotic translation initiation factor 5-2
At1g71790	At1g71790	Probable F-actin-capping protein subunit beta
At1g66430	At1g66430	Probable fructokinase-6, chloroplastic
At5g51830	At5g51830	Probable fructokinase-7
At5g40390	RFS5	Probable galactinol--sucrose galactosyltransferase 5
At1g78670	GGH3	Probable gamma-glutamyl hydrolase 3
At3g57240	BG3	Probable glucan endo-1,3-beta-glucosidase BG3
At2g21590	At2g21590	Probable glucose-1-phosphate adenylyltransferase large subunit, chloroplastic
At3g06930	PRMT13	Probable histone-arginine methyltransferase 1.3
At5g49020	PRMT14	Probable histone-arginine methyltransferase 1.4
At1g13750	PAP1	Probable inactive purple acid phosphatase 1
At1g13900	PAP2	Probable inactive purple acid phosphatase 2
At5g50400	PAP27	Probable inactive purple acid phosphatase 27
At5g10020	At5g10020	Probable inactive receptor kinase At5g10020
At3g26900	SKL1	Probable inactive shikimate kinase like 1, chloroplastic
At5g10170	IPS3	Probable inositol 3-phosphate synthase isozyme 3
At2g46760	GULLO6	Probable L-gulonolactone oxidase 6
At3g14840	LRR-RLK	Probable leucine-rich repeat receptor-like serine/threonine-protein kinase At3g14840
At3g04520	THA2	Probable low-specificity L-threonine aldolase 2
At1g06840	At1g06840	Probable LRR receptor-like serine/threonine-protein kinase At1g06840
At1g56140	At1g56140	Probable LRR receptor-like serine/threonine-protein kinase At1g56140
At5g59680	At5g59680	Probable LRR receptor-like serine/threonine-protein kinase At5g59680
At1g51980	MPPalpha1	Probable mitochondrial-processing peptidase subunit alpha-1, mitochondrial
At5g52840	At5g52840	Probable NADH dehydrogenase [ubiquinone] 1 alpha subcomplex subunit 5, mitochondrial
At4g24780	At4g24780	Probable pectate lyase 18
At5g63180	At5g63180	Probable pectate lyase 22
At2g26440	PME12	Probable pectinesterase/pectinesterase inhibitor 12
At3g43270	PME32	Probable pectinesterase/pectinesterase inhibitor 32
At3g59010	PME35	Probable pectinesterase/pectinesterase inhibitor 35
At4g02330	PME41	Probable pectinesterase/pectinesterase inhibitor 41
At4g33220	PME44	Probable pectinesterase/pectinesterase inhibitor 44
At5g53370	PME61	Probable pectinesterase/pectinesterase inhibitor 61
At3g59770	SAC9	Probable phosphoinositide phosphatase SAC9
At4g11600	GPX6	Probable phospholipid hydroperoxide glutathione peroxidase 6, mitochondrial
At1g74260	At1g74260	Probable phosphoribosylformylglycinamidine synthase, chloroplastic/mitochondrial
At4g34540	PLR3	Probable pinoresinol-lariciresinol reductase 3
At2g35490	PAP3	Probable plastid-lipid-associated protein 3, chloroplastic
At4g29720	PAO5	Probable polyamine oxidase 5
At2g47250	At2g47250	Probable pre-mRNA-splicing factor ATP-dependent RNA helicase DEAH3
At3g26560	At3g26560	Probable pre-mRNA-splicing factor ATP-dependent RNA helicase DEAH5
At3g53970	At3g53970	Probable proteasome inhibitor
At4g16580	At4g16580	Probable protein phosphatase 2C 55
At4g28400	At4g28400	Probable protein phosphatase 2C 58
At5g53140	At5g53140	Probable protein phosphatase 2C 76
At5g66720	At5g66720	Probable protein phosphatase 2C 80
At2g23200	At2g23200	Probable receptor-like protein kinase At2g23200
At5g38990	At5g38990	Probable receptor-like protein kinase At5g38990
At3g04790	RPI3	Probable ribose-5-phosphate isomerase 3, chloroplastic
At4g34730	At4g34730	Probable ribosome-binding factor A, chloroplastic
At1g73660	SIS8	Probable serine/threonine-protein kinase SIS8
At2g24940	MP3	Probable steroid-binding protein 3
At5g11110	SPS2	Probable sucrose-phosphate synthase 2
At2g43940	HOL3	Probable thiol methyltransferase 2
At4g22720	GCP2	Probable tRNA N6-adenosine threonylcarbamoyltransferase
At5g42990	UBC18	Probable ubiquitin-conjugating enzyme E2 18
At5g16510	RGP5	Probable UDP-arabinopyranose mutase 5
At5g65730	XTH6	Probable xyloglucan endotransglucosylase/hydrolase protein 6
At4g37800	XTH7	Probable xyloglucan endotransglucosylase/hydrolase protein 7
At3g28040	At3g28040	Probably inactive leucine-rich repeat receptor-like protein kinase At3g28040
At5g56600	PRF3	Profilin-3
At5g12950	At5g12950	Proline-tRNA ligase (DUF1680)
At4g36195	At4g36195	Prolyl carboxypeptidase like protein
At2g47940	DEGP2	Protease Do-like 2, chloroplastic
At4g18370	DEGP5	Protease Do-like 5, chloroplastic
At5g40200	DEGP9	Protease Do-like 9
At5g42790	PAF1	Proteasome subunit alpha type-1-A
At2g27020	PAG1	Proteasome subunit alpha type-3
At2g05840	PAA2	Proteasome subunit alpha type-6-B
At1g21720	PBC1	Proteasome subunit beta type-3-A
At3g26340	PBE2	Proteasome subunit beta type-5-B
At3g27430	PBB1	Proteasome subunit beta type-7-A
At1g32500	ABCI7	Protein ABCI7, chloroplastic
At3g28930	AIG2A	Protein AIG2 A
At3g28940	AIG2B	Protein AIG2 B
At4g29510	PRMT11	Protein arginine N-methyltransferase 1.1
At1g48410		Protein argonaute 1
At2g27040	2004-08-01	Protein argonaute 4
At3g18490	ASPG1	Protein ASPARTIC PROTEASE IN GUARD CELL 1
At1g23140	CAR8	Protein C2-DOMAIN ABA-RELATED 8
At1g64980	CDI	Protein CDI
At1g62390	CLMP1	Protein CLMP1
At3g04680	CLPS3	Protein CLP1 homolog
At5g60920	COB	Protein COBRA
At1g67230	CRWN1	Protein CROWDED NUCLEI 1
At5g65770	CRWN4	Protein CROWDED NUCLEI 4
At2g33740	CUTA	Protein CutA, chloroplastic
At1g26110	DCP5	Protein decapping 5
At1g21750	PDIL1-1	Protein disulfide isomerase-like 1-1
At1g77510	PDIL1-2	Protein disulfide isomerase-like 1-2
At3g54960	PDIL1-3	Protein disulfide isomerase-like 1-3
At5g60640	PDIL1-4	Protein disulfide isomerase-like 1-4
At3g16110	PDIL1-6	Protein disulfide isomerase-like 1-6
At2g32920	PDIL2-3	Protein disulfide-isomerase 2-3
At1g04980	PDIL2-2	Protein disulfide-isomerase like 2-2
At1g75690	LQY1	Protein disulfide-isomerase LQY1, chloroplastic
At3g02720	DJ1D	Protein DJ-1 homolog D
At4g10500	DLO1	Protein DMR6-LIKE OXYGENASE 1
At2g17840	ERD7	Protein EARLY-RESPONSIVE TO DEHYDRATION 7, chloroplastic
At4g13840	CER26	Protein ECERIFERUM 26
At3g48090	EDS1	Protein EDS1
At5g67160	EPS1	Protein ENHANCED PSEUDOMONAS SUSCEPTIBILITY 1
At1g27510	EX2	Protein EXECUTER 2, chloroplastic
At5g51550	EXL3	Protein EXORDIUM-like 3
At1g16720	HCF173	Protein HIGH CHLOROPHYLL FLUORESCENCE PHENOTYPE 173, chloroplastic
At1g72970	HTH	Protein HOTHEAD
At2g25750	At2g25750	Protein kinase family protein
At5g56890	At5g56890	Protein kinase superfamily protein
At5g26110	At5g26110	Protein kinase superfamily protein
At3g16270	MTV1	Protein MODIFIED TRANSPORT TO THE VACUOLE 1
At2g41760	NTAQ1	Protein N-terminal glutamine amidohydrolase
At1g55370	NDF5	Protein NDH-DEPENDENT CYCLIC ELECTRON FLOW 5
At5g19680	At5g19680	Protein phosphatase 1 regulatory inhibitor subunit PPP1R7 homolog
At5g17270	MKP11.12	Protein prenylyltransferase superfamily protein
At5g25060	RRC1	Protein RRC1
At5g52810	SARD4	Protein SAR DEFICIENT 4
At3g14350	SRF7	Protein STRUBBELIG-RECEPTOR FAMILY 7
At2g46340	SPA1	Protein SUPPRESSOR OF PHYA-105 1
At1g67140	SWEETIE	Protein SWEETIE
At3g08010	ATAB2	Protein TAB2 homolog, chloroplastic
At3g18890	TIC62	Protein TIC 62, chloroplastic
At3g01340	SEC13A	Protein transport protein SEC13 homolog A
At5g47480	MAG5	Protein transport protein SEC16A homolog
At4g01810	At4g01810	Protein transport protein SEC23
At4g14160	At4g14160	Protein transport protein SEC23
At4g32640	At4g32640	Protein transport protein Sec24-like At4g32640
At4g01080	TBL26	Protein trichome birefringence-like 26
At2g34070	TBL37	Protein trichome birefringence-like 37
At1g29050	TBL38	Protein trichome birefringence-like 38
At3g14850	TBL41	Protein trichome birefringence-like 41
At4g28080	TSS	Protein TSS
At4g32330	WDL5	Protein WVD2-like 5
At5g50240	PIMT2	Protein-L-isoaspartate O-methyltransferase 2
At3g61080	At3g61080	Protein-ribulosamine 3-kinase, chloroplastic
At4g27500	PPI1	Proton pump-interactor 1
At5g11450	PPD5	PsbP domain protein (Mog1/PsbP/DUF1795-like photosystem II reaction center PsbP family protein)
At4g15510	PPD1	PsbP domain-containing protein 1, chloroplastic
At2g28605	PPD2	PsbP domain-containing protein 2, chloroplastic
At1g76450	PPD3	PsbP domain-containing protein 3, chloroplastic
At3g56650	PPD6	PsbP domain-containing protein 6, chloroplastic
At3g55330	PPL1	PsbP-like protein 1, chloroplastic
At3g04820	At3g04820	Pseudouridine synthase family protein
At1g29810	PDL2	Pterin-4-alpha-carbinolamine dehydratase 2, mitochondrial
At2g16430	PAP10	Purple acid phosphatase 10
At3g17790	PAP17	Purple acid phosphatase 17
At2g01890	PAP8	Purple acid phosphatase 8
At5g16450	At5g16450	Putative 4-hydroxy-4-methyl-2-oxoglutarate aldolase 2
At5g56260	At5g56260	Putative 4-hydroxy-4-methyl-2-oxoglutarate aldolase 3
At3g15690	At3g15690	Putative acetyl-CoA carboxylase biotin-containing subunit
At4g11521	CRK34	Putative cysteine-rich receptor-like protein kinase 34
At1g77030	RH29	Putative DEAD-box ATP-dependent RNA helicase 29
At1g48610	At1g48610	Putative DNA-binding protein At1g48610
At5g13650	SVR3	Putative elongation factor TypA-like SVR3, chloroplastic
At1g17890	GER2	Putative GDP-L-fucose synthase 2
At4g31870	GPX7	Putative glutathione peroxidase 7, chloroplastic
At3g03920	At3g03920	Putative H/ACA ribonucleoprotein complex subunit 1-like protein 1
At3g22460	OASA2	Putative inactive cysteine synthase 2
At4g32320	APX6	Putative L-ascorbate peroxidase 6
At3g07670	F17A17.1	Putative ribulose-1,5-bisphosphate carboxylase/oxygenase small subunit N-methyltransferase I
At5g24020	MIND1	Putative septum site-determining protein minD homolog, chloroplastic
At1g63780	T12P18.20	Putative U3 small nucleolar ribonucleoprotein
At2g38230	PDX11	Pyridoxal 5'-phosphate synthase subunit PDX1.1
At5g01410	PDX13	Pyridoxal 5'-phosphate synthase subunit PDX1.3
At4g26860	At4g26860	Pyridoxal phosphate homeostasis protein
At5g49970	PPOX1	Pyridoxine/pyridoxamine 5'-phosphate oxidase 1, chloroplastic
At1g20950	PFP-ALPHA1	Pyrophosphate--fructose 6-phosphate 1-phosphotransferase subunit alpha 1
At4g04040	PFP-BETA2	Pyrophosphate--fructose 6-phosphate 1-phosphotransferase subunit beta 2
At5g54960	PDC2	Pyruvate decarboxylase 2
At1g01090	PDH-E1 ALPHA	Pyruvate dehydrogenase E1 component subunit alpha-3, chloroplastic
At1g30120	PDH-E1 BETA	Pyruvate dehydrogenase E1 component subunit beta-2, chloroplastic
At2g34590	E1-BETA-2	Pyruvate dehydrogenase E1 component subunit beta-3, chloroplastic
At5g08570	MAH20.13	Pyruvate kinase
At2g36580	At2g36580	Pyruvate kinase
At3g52990	At3g52990	Pyruvate kinase
At5g56350	MCD7.8	Pyruvate kinase
At4g21210	RP1	Pyruvate, phosphate dikinase regulatory protein 1, chloroplastic
At3g06540	REP	Rab escort protein 1
At4g39990	RABA4B	Ras-related protein RABA4b
At5g47200	RABD2B	Ras-related protein RABD2b
At3g20390	RIDA	Reactive Intermediate Deaminase A, chloroplastic
At1g18080	RACK1A	Receptor for activated C kinase 1A
At2g01820	TMK3	Receptor-like kinase TMK3
At5g59670	At5g59670	Receptor-like protein kinase At5g59670
At1g65790	SD17	Receptor-like serine/threonine-protein kinase SD1-7
At4g21380	SD18	Receptor-like serine/threonine-protein kinase SD1-8
At3g02510	At3g02510	Regulator of chromosome condensation (RCC1) family protein
At3g14790	RHM3	Rhamnose biosynthesis 3
At1g16460	RDH2	Rhodanese homologue 2
At5g19370	At5g19370	Rhodanese-like/PpiC domain-containing protein 12, chloroplastic
At2g39780	RNS2	Ribonuclease 2
At5g63420	RNJ	Ribonuclease J
At5g07350	TSN1	Ribonuclease TUDOR 1
At5g61780	TSN2	Ribonuclease TUDOR 2
At3g23580	RNR2A	Ribonucleoside-diphosphate reductase small chain A
At2g42910	PRS4	Ribose-phosphate pyrophosphokinase 4
At3g58660	T20N10_10	Ribosomal protein L1p/L10e family
At3g23620	At3g23620	Ribosome production factor 2 homolog
AtCg00490	rbcL	Ribulose bisphosphate carboxylase large chain
At5g38430	RBCS-1B	Ribulose bisphosphate carboxylase small chain 1B, chloroplastic
At5g61410	RPE	Ribulose-5-phosphate-3-epimerase, chloroplastic
At3g01850	At3g01850	Ribulose-phosphate 3-epimerase
At1g63290	At1g63290	Ribulose-phosphate 3-epimerase
At2g39050	EULS3	Ricin B-like lectin EULS3
At5g03180	At5g03180	RING/U-box superfamily protein
At2g35920	At2g35920	RNA helicase family protein
At3g52260	At3g52260	RNA pseudouridine synthase 5
At5g55670	MDF20.11	RNA-binding (RRM/RBD/RNP motifs) family protein
At3g07810	At3g07810	RNA-binding (RRM/RBD/RNP motifs) family protein
At1g14340	At1g14340	RNA-binding (RRM/RBD/RNP motifs) family protein
At4g26000	PEP	RNA-binding KH domain-containing protein PEPPER
At2g37220	CP29B	RNA-binding protein CP29B, chloroplastic
At2g30520	RPT2	Root phototropism protein 2
At1g06560	NOP2C	rRNA (cytosine-C(5))-methyltransferase NOP2C
At5g52470	FIB1	rRNA 2'-O-methyltransferase fibrillarin 1
At4g25630	FIB2	rRNA 2'-O-methyltransferase fibrillarin 2
At4g22530	At4g22530	S-adenosyl-L-methionine-dependent methyltransferases superfamily protein
At3g60910	At3g60910	S-adenosyl-L-methionine-dependent methyltransferases superfamily protein
At2g22400	At2g22400	S-adenosyl-L-methionine-dependent methyltransferases superfamily protein
At2g32160	At2g32160	S-adenosyl-L-methionine-dependent methyltransferases superfamily protein
At3g61990	F21F14.160	S-adenosyl-L-methionine-dependent methyltransferases superfamily protein
At2g32170	At2g32170	S-adenosyl-L-methionine-dependent methyltransferases superfamily protein
At1g02500	SAM1	S-adenosylmethionine synthase 1
At4g01850	SAM2	S-adenosylmethionine synthase 2
At2g36880	METK3	S-adenosylmethionine synthase 3
At3g17390	METK4	S-adenosylmethionine synthase 4
At2g20610	SUR1	S-alkyl-thiohydroximate lyase SUR1
At2g41530	SFGH	S-formylglutathione hydrolase
At5g63060	MDC12.2	Sec14p-like phosphatidylinositol transfer family protein
At3g55800	At3g55800	Sedoheptulose-1,7-bisphosphatase, chloroplastic
At4g14040	SBP2	Selenium-binding protein 2
At5g13030	At5g13030	Selenoprotein O
At2g29350	SAG13	Senescence-associated protein 13
At3g51250	At3g51250	Senescence/dehydration-associated protein At3g51250
At4g15450	At4g15450	Senescence/dehydration-associated protein-like protein
At2g17640	SAT2	Serine acetyltransferase 2
At3g13110	SAT3	Serine acetyltransferase 3, mitochondrial
At5g56760	SAT5	Serine acetyltransferase 5
At2g23000	SCPL10	Serine carboxypeptidase-like 10
At2g22970	SCPL11	Serine carboxypeptidase-like 11
At4g12910	SCPL20	Serine carboxypeptidase-like 20
At3g02110	SCPL25	Serine carboxypeptidase-like 25
At2g35780	SCPL26	Serine carboxypeptidase-like 26
At4g30810	SCPL29	Serine carboxypeptidase-like 29
At5g23210	SCPL34	Serine carboxypeptidase-like 34
At5g42240	SCPL42	Serine carboxypeptidase-like 42
At1g28110	SCPL45	Serine carboxypeptidase-like 45
At2g33530	SCPL46	Serine carboxypeptidase-like 46
At3g45010	SCPL48	Serine carboxypeptidase-like 48
At3g10410	SCPL49	Serine carboxypeptidase-like 49
At2g27920	SCPL51	Serine carboxypeptidase-like 51
At2g23010	SCPL9	Serine carboxypeptidase-like 9
At4g37930	SHM1	Serine hydroxymethyltransferase 1, mitochondrial
At5g26780	SHM2	Serine hydroxymethyltransferase 2, mitochondrial
At4g32520	SHM3	Serine hydroxymethyltransferase 3, chloroplastic
At1g36370	SHM7	Serine hydroxymethyltransferase 7
At1g47710	SERPIN1	Serine protease inhibitor (SERPIN) family protein
At1g11870	OVA7	Serine--tRNA ligase, chloroplastic/mitochondrial
At3g53500	RS2Z32	Serine/arginine-rich splicing factor RS2Z32
At3g09880	B'BETA	Serine/threonine protein phosphatase 2A 57 kDa regulatory subunit B' beta isoform
At1g10940	SRK2A	Serine/threonine-protein kinase SRK2A
At1g25490	PP2AA1	Serine/threonine-protein phosphatase 2A 65 kDa regulatory subunit A alpha isoform
At3g25800	PP2AA2	Serine/threonine-protein phosphatase 2A 65 kDa regulatory subunit A beta isoform
At4g08960	At4g08960	Serine/threonine-protein phosphatase 2A activator
At1g08420	BSL2	Serine/threonine-protein phosphatase BSL2
At2g29400	TOPP1	Serine/threonine-protein phosphatase PP1 isozyme 1
At5g27840	TOPP8	Serine/threonine-protein phosphatase PP1 isozyme 8
At3g58500	PP2A4	Serine/threonine-protein phosphatase PP2A-4 catalytic subunit
At1g31440	SH3P1	SH3 domain-containing protein 1
At5g26751	ASK1	Shaggy-related protein kinase alpha
At4g39540	SK2	Shikimate kinase 2, chloroplastic
At5g48930	HST	Shikimate O-hydroxycinnamoyltransferase
At2g47130	SDR3a	Short-chain dehydrogenase reductase 3a
At2g24190	SDR2b	Short-chain dehydrogenase/reductase 2b
At2g47450	CAO	Signal recognition particle 43 kDa protein, chloroplastic
At3g45190	At3g45190	SIT4 phosphatase-associated family protein
At1g06110	SKIP16	SKP1/ASK-interacting protein 16
At5g67240	SDN3	Small RNA degrading nuclease 3
At1g80500	At1g80500	SNARE-like superfamily protein
At1g78510	SPS1	Solanesyl diphosphate synthase 1, chloroplastic
At1g17050	SPS2	Solanesyl diphosphate synthase 2, chloroplastic
At2g34630	SPS3	Solanesyl diphosphate synthase 3, chloroplastic/mitochondrial
At2g18230	PPA2	Soluble inorganic pyrophosphatase 2
At4g01480	PPA5	Soluble inorganic pyrophosphatase 5
At1g70310	SPDSYN2	Spermidine synthase 2
At5g53120	SPMS	Spermine synthase
At3g55220	SAP130B	Spliceosome-associated protein 130 B
At2g16940	At2g16940	Splicing factor, CC1-like protein
At5g24300	SS1	Starch synthase 1, chloroplastic/amyloplastic
At2g43710	FAB2	Stearoyl-[acyl-carrier-protein] 9-desaturase 7, chloroplastic
At3g17210	HS1	Stress-response A/B barrel domain-containing protein HS1
At5g42390	SPP	Stromal processing peptidase, chloroplastic
At5g51750	SBT1.3	Subtilisin-like protease SBT1.3
At3g14067	SBT1.4	Subtilisin-like protease SBT1.4
At4g34980	SBT1.6	Subtilisin-like protease SBT1.6
At5g67360	SBT1.7	Subtilisin-like protease SBT1.7
At2g05920	SBT1.8	Subtilisin-like protease SBT1.8
At4g30020	SBT2.6	Subtilisin-like protease SBT2.6
At2g39850	SBT4.1	Subtilisin-like protease SBT4.1
At2g04160	AIR3	Subtilisin-like protease SBT5.3
At5g45650	SBT5.6	Subtilisin-like protease SBT5.6
At5g66760	SDH1-1	Succinate dehydrogenase [ubiquinone] flavoprotein subunit 1, mitochondrial
At3g27380	SDH2-1	Succinate dehydrogenase [ubiquinone] iron-sulfur subunit 1, mitochondrial
At5g08300	At5g08300	Succinate--CoA ligase [ADP-forming] subunit alpha-1, mitochondrial
At4g26620	At4g26620	Sucrase-like protein
At5g23310	FSD3	Superoxide dismutase [Fe] 3, chloroplastic
At2g33610	SWI3B	SWI/SNF complex subunit SWI3B
At3g05710	SYP43	Syntaxin-43
At3g20050	CCT1	T-complex protein 1 subunit alpha
At1g24510	CCT5	T-complex protein 1 subunit epsilon
At3g02530	CCT6A	T-complex protein 1 subunit zeta 1
At5g27390	At5g27390	Tagatose-6-phosphate ketose/aldose isomerase, putative (Mog1/PsbP/DUF1795-like photosystem II reaction center PsbP family protein)
At5g25150	TAF5	TBP-associated factor 5
At3g59400	GUN4	Tetrapyrrole-binding protein, chloroplastic
At1g04190	TPR3	Tetratricopeptide repeat (TPR)-like superfamily protein
At4g37210	AP22.13	Tetratricopeptide repeat (TPR)-like superfamily protein
At1g01320	At1g01320	Tetratricopeptide repeat (TPR)-like superfamily protein
At1g24460	TNO1	TGN-related, localized SYP41 interacting protein
At1g22940	TH1	Thiamine biosynthetic bifunctional enzyme TH1, chloroplastic
At5g54770	THI1	Thiamine thiazole synthase, chloroplastic
At2g43910	HOL1	Thiocyanate methyltransferase 1
At3g45310	At3g45310	Thiol protease aleurain-like
At5g65840	At5g65840	Thioredoxin superfamily protein
At4g29670	At4g29670	Thioredoxin-like 2-2, chloroplastic
At1g79230	STR1	Thiosulfate/3-mercaptopyruvate sulfurtransferase 1, mitochondrial
At5g56130	THO3	THO complex subunit 3
At5g59950	ALY1	THO complex subunit 4A
At5g02530	ALY2	THO complex subunit 4B
At2g19430	THO6	THO complex subunit 6
At3g10050	OMR1	Threonine dehydratase biosynthetic, chloroplastic
At2g04842	EMB2761	Threonine--tRNA ligase, chloroplastic/mitochondrial 2
At5g26830	THRRS	Threonine--tRNA ligase, mitochondrial 1
At5g52970	At5g52970	Thylakoid lumenal 15.0 kDa protein 2, chloroplastic
At4g02530	At4g02530	Thylakoid lumenal 16.5 kDa protein, chloroplastic
At3g63540	At3g63540	Thylakoid lumenal 19 kDa protein, chloroplastic
At4g09010	TL29	Thylakoid lumenal 29 kDa protein, chloroplastic
At3g23710	Tic22-III	Tic22-like family protein
At4g32770	VTE1	Tocopherol cyclase, chloroplastic
At1g72930	TIR	Toll/interleukin-1 receptor-like protein
At1g21380	TOL3	TOM1-like protein 3
At4g32760	TOL9	TOM1-like protein 9
At3g16830	TPR2	Topless-related protein 2
At3g15880	TPR4	Topless-related protein 4
At1g53300	TTL1	TPR repeat-containing thioredoxin TTL1
At5g02280	At5g02280	Trafficking protein particle complex subunit
At5g58030	At5g58030	Trafficking protein particle complex subunit
At2g32080	PURA1	Transcription factor Pur-alpha 1
At5g51110	MWD22.5	Transcriptional coactivator/pterin dehydratase
At5g05570	MOP10.11	Transducin family protein / WD-40 repeat family protein
At1g29320	At1g29320	Transducin/WD40 repeat-like superfamily protein
At3g60750	TKL-1	Transketolase-1, chloroplastic
At1g64510	At1g64510	Translation elongation factor EF1B/ribosomal protein S6 family protein
At3g16640	TCTP1	Translationally-controlled tumor protein 1
At4g02510	TOC159	Translocase of chloroplast 159, chloroplastic
At2g30010	TBL45	TRICHOME BIREFRINGENCE-LIKE 45
At1g78570	RHM1	Trifunctional UDP-glucose 4,6-dehydratase/UDP-4-keto-6-deoxy-D-glucose 3,5-epimerase/UDP-4-keto-L-rhamnose-reductase RHM1
At1g76880	DF1	Trihelix transcription factor DF1
At3g55440	CTIMC	Triosephosphate isomerase, cytosolic
At4g20850	TPP2	Tripeptidyl-peptidase 2
At1g03110	TRM82	tRNA (guanine-N(7)-)-methyltransferase non-catalytic subunit
At4g38890	At4g38890	tRNA-dihydrouridine(47) synthase [NAD(P)(+)]-like
At2g29290	At2g29290	Tropinone reductase homolog At2g29290
At2g29340	At2g29340	Tropinone reductase homolog At2g29340
At2g29360	SDR	Tropinone reductase homolog At2g29360
At5g06060	At5g06060	Tropinone reductase homolog At5g06060
At5g39830	DEG8	Trypsin family protein with PDZ domain-containing protein
At4g02610	TRPA1	Tryptophan synthase alpha chain
At5g54810	TSB1	Tryptophan synthase beta chain 1, chloroplastic
At3g60740	TFCD	Tubulin-folding cofactor D
At1g71440	TFCE	Tubulin-folding cofactor E
At3g09670	F11F8_26	Tudor/PWWP/MBT superfamily protein
At5g36160	TAT	Tyrosine aminotransferase
At1g09760	At1g09760	U2 small nuclear ribonucleoprotein A'
At1g19140	At1g19140	Ubiquinone biosynthesis protein
At5g06600	UBP12	Ubiquitin carboxyl-terminal hydrolase 12
At3g20630	UBP14	Ubiquitin carboxyl-terminal hydrolase 14
At1g79650	RAD23B	Ubiquitin receptor RAD23b
At1g64230	UBC28	Ubiquitin-conjugating enzyme 28
At5g53300	UBC10	Ubiquitin-conjugating enzyme E2 10
At5g56150	UBC30	Ubiquitin-conjugating enzyme E2 30
At2g36060	UEV1C	Ubiquitin-conjugating enzyme E2 variant 1C
At3g52560	UEV1D	Ubiquitin-conjugating enzyme E2 variant 1D
At1g51730	At1g51730	Ubiquitin-conjugating enzyme family protein
At1g77710	At1g77710	Ubiquitin-fold modifier 1
At4g06599	At4g06599	Ubiquitin-like domain-containing CTD phosphatase
At1g05350	At1g05350	Ubiquitin-like modifier-activating enzyme 5
At3g56860	UBA2A	UBP1-associated protein 2A
At3g15010	UBA2C	UBP1-associated protein 2C
At2g27860	AXS1	UDP-D-apiose/UDP-D-xylose synthase 1
At1g08200	AXS2	UDP-D-apiose/UDP-D-xylose synthase 2
At1g26570	UGD1	UDP-glucose 6-dehydrogenase 1
At3g29360	UGD2	UDP-glucose 6-dehydrogenase 2
At5g15490	UGD3	UDP-glucose 6-dehydrogenase 3
At3g21750	UGT71B1	UDP-glycosyltransferase 71B1
At3g21760	UGT71B2	UDP-glycosyltransferase 71B2
At1g07260	UGT71C3	UDP-glycosyltransferase 71C3
At1g07240	UGT71C5	UDP-glycosyltransferase 71C5
At4g01070	UGT72B1	UDP-glycosyltransferase 72B1
At1g01420	UGT72B3	UDP-glycosyltransferase 72B3
At2g36800	UGT73C5	UDP-glycosyltransferase 73C5
At1g24100	UGT74B1	UDP-glycosyltransferase 74B1
At2g31750	UGT74D1	UDP-glycosyltransferase 74D1
At4g14090	UGT75C1	UDP-glycosyltransferase 75C1
At3g46670	UGT76E11	UDP-glycosyltransferase 76E11
At4g27560	UGT79B2	UDP-glycosyltransferase 79B2
At4g15490	UGT84A3	UDP-glycosyltransferase 84A3
At4g15500	UGT84A4	UDP-glycosyltransferase 84A4
At2g36970	UGT86A1	UDP-glycosyltransferase 86A1
At3g16520	UGT88A1	UDP-glycosyltransferase 88A1
At5g03490	UGT89A2	UDP-glycosyltransferase 89A2
At5g12890	UGT92A1	UDP-glycosyltransferase 92A1
At1g31070	GLCNAC1PUT1	UDP-N-acetylglucosamine diphosphorylase 1
At4g33030	SQD1	UDP-sulfoquinovose synthase, chloroplastic
At5g63860	UVR8	Ultraviolet-B receptor UVR8
At5g19240	At5g19240	Uncharacterized GPI-anchored protein At5g19240
At5g19250	At5g19250	Uncharacterized GPI-anchored protein At5g19250
At1g06690	At1g06690	Uncharacterized oxidoreductase At1g06690, chloroplastic
At2g26340	At2g26340	Uncharacterized protein
At5g56850	MIK19.5	Uncharacterized protein
At1g32220	At1g32220	Uncharacterized protein At1g32220, chloroplastic
At2g34460	At2g34460	Uncharacterized protein At2g34460, chloroplastic
At2g38710	At2g38710	Uncharacterized protein At2g38710
At3g49140	At3g49140	Uncharacterized protein At3g49140
At4g12070	At4g12070	Uncharacterized protein At4g12070/F16J13_140
At5g11420	At5g11420	Uncharacterized protein At5g11420
At4g04770	ABCI8	UPF0051 protein ABCI8, chloroplastic
At1g67550	URE	Urease
At2g34470	UREG	Urease accessory protein G
At2g35810	At2g35810	Ureidoglycolate hydrolase
At5g43600	UAH	Ureidoglycolate hydrolase
At3g54470	PYRE-F	Uridine 5'-monophosphate synthase
At1g12840	VHA-C	V-type proton ATPase subunit C
At4g02620	VHA-F	V-type proton ATPase subunit F
At5g04920	VPS36	Vacuolar protein sorting-associated protein 36
At1g62710	bVPE	Vacuolar-processing enzyme beta-isozyme
At4g32940	At4g32940	Vacuolar-processing enzyme gamma-isozyme
At3g52850	VSR1	Vacuolar-sorting receptor 1
At1g30900	VSR6	Vacuolar-sorting receptor 6
At5g24780	VSP1	Vegetative storage protein 1
At3g60600	PVA11	Vesicle-associated protein 1-1
At1g08820	PVA22	Vesicle-associated protein 2-2
At1g21250	WAK1	Wall-associated receptor kinase 1
At2g47790	GTS1	WD repeat-containing protein GTS1
At3g44990	XTH31	Xyloglucan endotransglucosylase/hydrolase protein 31
At5g49650	XK2	Xylulose kinase 2
At5g58250	EMB3143	YCF54
At5g67030	ZEP	Zeaxanthin epoxidase, chloroplastic
At5g08450	HDC1	Zinc finger CCCH domain protein
At2g28450	At2g28450	Zinc finger CCCH domain-containing protein 24
At5g09620
At5g49930
At1g52670
