# Supplementary material for: Proteome Dynamics of Persulfidation in Leaf Tissue under Light/Dark Conditions and Carbon Deprivation
Source: Antioxidants (Basel). 2023 Mar 23;12(4):789. doi: 10.3390/antiox12040789 (PMC10135009; doi:10.3390/antiox12040789)
Supplement: Supplementary file 1 [file antioxidants-12-00789-s001.zip › Dataset S10.xlsx]

## Sheet: Hoja1
Dataset 10. Differentilly persulfidated proteins in samples S1 compared to S3
Significant	#NAME?	Difference (S1-S3)		Protein IDs	Majority protein IDs	id	Gene name	Protein name	Symbol color	Symbol type	Symbol size	Show label	Gene ontology (biological process)	Gene ontology (cellular component)	Gene ontology (molecular function)	ANOVA Significant	Peptides	Razor + unique peptides	Unique peptides	Sequence coverage [%]	Unique + razor sequence coverage [%]	Unique sequence coverage [%]	Mol. weight [kDa]	Q-value	Score	Intensity	MS/MS count	Intensity MN1	Intensity MN2	Intensity MN3	Intensity MN4	Intensity PN1	Intensity PN2	Intensity PN3	Intensity PN4	Intensity S11	Intensity S12	Intensity S13	Intensity S14	Intensity S21	Intensity S22	Intensity S23	Intensity S24	Intensity S31	Intensity S32	Intensity S33	Intensity S34	Intensity S41	Intensity S42
+	9.95308	2.70726	6.53082	Q42547;Q2V4M4	Q42547;Q2V4M4	2289	CAT3	Catalase-3;Catalase 3	Color2 [DarkGray]	1	4		cellular response to nitrogen starvation [GO:0006995];cellular response to phosphate starvation [GO:0016036];cellular response to sulfate starvation [GO:0009970];hydrogen peroxide catabolic process [GO:0042744];response to cadmium ion [GO:0046686];response to cold [GO:0009409];response to hydrogen peroxide [GO:0042542];response to light stimulus [GO:0009416];response to oxidative stress [GO:00069…	apoplast [GO:0048046];cell wall [GO:0005618];chloroplast [GO:0009507];chloroplast envelope [GO:0009941];chloroplast stroma [GO:0009570];cytoplasm [GO:0005737];cytosol [GO:0005829];cytosolic ribosome [GO:0022626];mitochondrion [GO:0005739];nucleus [GO:0005634];peroxisome [GO:0005777];plasma membrane [GO:0005886];plasmodesma [GO:0009506];vacuole [GO:0005773]	catalase activity [GO:0004096];cobalt ion binding [GO:0050897];heme binding [GO:0020037];mRNA binding [GO:0003729]	+	67	67	55	85.6	85.6	77.8	56.695	0	323.31	310660000000	1359	7988600000	8876600000	7233400000	7104800000	7659100000	8587800000	8232200000	8340700000	33278000000	30309000000	34351000000	29542000000	9244500000	10715000000	11794000000	11793000000	6866100000	5525400000	6304400000	7704100000	12994000000	11327000000
+	5.17938	2.6823	6.41877	Q9SZ30	Q9SZ30	5756	HISN4	Imidazole glycerol phosphate synthase hisHF, chloroplastic	Color2 [DarkGray]	1	4		glutamine metabolic process [GO:0006541];histidine biosynthetic process [GO:0000105]	chloroplast [GO:0009507];chloroplast stroma [GO:0009570];plastid [GO:0009536]	glutaminase activity [GO:0004359];imidazoleglycerol-phosphate synthase activity [GO:0000107];oxo-acid-lyase activity [GO:0016833]	+	59	59	59	76.5	76.5	76.5	64.192	0	323.31	44746000000	558	3019300000	3849600000	2740100000	2787500000	3260000000	3550900000	3503500000	3459500000	1748800000	1827000000	2213900000	1885700000	858390000	985060000	825960000	864060000	591330000	619690000	696780000	691170000	1215400000	1090800000
+	6.39944	2.66841	6.35729	Q9SJH7	Q9SJH7	5405	CSY3	Citrate synthase 3, peroxisomal	Color2 [DarkGray]	1	4		carbohydrate metabolic process [GO:0005975];fatty acid beta-oxidation [GO:0006635];tricarboxylic acid cycle [GO:0006099]	cytosol [GO:0005829];mitochondrial matrix [GO:0005759];peroxisome [GO:0005777]	citrate (Si)-synthase activity [GO:0004108]	+	31	31	21	60.5	60.5	42.6	56.175	0	255.76	28772000000	405	1140800000	1296100000	926120000	923350000	1370800000	1692800000	1702100000	1520800000	1983000000	1968900000	2246200000	1944600000	601920000	596890000	1047800000	947590000	661220000	402550000	642100000	652380000	1143000000	982220000
+	4.50395	2.64482	6.25419	Q9SCY3	Q9SCY3	5246	PNSL4	Photosynthetic NDH subunit of lumenal location 4, chloroplastic	Color2 [DarkGray]	1	4			chloroplast [GO:0009507];chloroplast thylakoid lumen [GO:0009543];chloroplast thylakoid membrane [GO:0009535];plasma membrane [GO:0005886];thylakoid [GO:0009579]	peptidyl-prolyl cis-trans isomerase activity [GO:0003755]	+	6	6	6	30.4	30.4	30.4	23.259	0	41.482	1534000000	34	0	0	0	0	0	0	0	0	253730000	135840000	218310000	241310000	54587000	81933000	74440000	62873000	18526000	8598700	40106000	40620000	85288000	56664000
+	5.78748	2.64393	6.25034	P17745	P17745	1649	TUFA	Elongation factor Tu, chloroplastic	Color2 [DarkGray]	1	4		chloroplast organization [GO:0009658];leaf development [GO:0048366];translational elongation [GO:0006414]	apoplast [GO:0048046];chloroplast [GO:0009507];chloroplast envelope [GO:0009941];chloroplast nucleoid [GO:0042644];chloroplast stroma [GO:0009570];chloroplast thylakoid [GO:0009534];chloroplast thylakoid membrane [GO:0009535];nucleolus [GO:0005730];nucleus [GO:0005634];plastid [GO:0009536]	GTP binding [GO:0005525];GTPase activity [GO:0003924];translation elongation factor activity [GO:0003746]	+	44	43	43	67	63.9	63.9	51.63	0	323.31	137140000000	725	2416000000	2276700000	2100800000	1935000000	3632400000	3578500000	3587900000	2948800000	10282000000	8032400000	12200000000	10771000000	4725500000	5016100000	5733600000	5985500000	4667300000	3693800000	4783700000	4913200000	8648100000	8108900000
+	5.52516	2.6298	6.18942	Q0WW26	Q0WW26	2098	At4g34450	Coatomer subunit gamma	Color2 [DarkGray]	1	4		endoplasmic reticulum to Golgi vesicle-mediated transport [GO:0006888];intracellular protein transport [GO:0006886];intra-Golgi vesicle-mediated transport [GO:0006891];protein secretion [GO:0009306]	chloroplast [GO:0009507];COPI vesicle coat [GO:0030126];cytosol [GO:0005829];endoplasmic reticulum [GO:0005783];endoplasmic reticulum-Golgi intermediate compartment [GO:0005793];Golgi apparatus [GO:0005794];Golgi membrane [GO:0000139];membrane [GO:0016020];plasma membrane [GO:0005886];plasmodesma [GO:0009506]	structural molecule activity [GO:0005198]	+	99	99	99	91.3	91.3	91.3	98.49	0	323.31	144270000000	935	15943000000	17195000000	13945000000	13932000000	19594000000	18522000000	17320000000	19732000000	887330000	769500000	858240000	800630000	415760000	335170000	343200000	316030000	263780000	322780000	237060000	442300000	544850000	520180000
+	6.26999	2.62473	6.16768	Q56WK6	Q56WK6	2342	PATL1	Patellin-1	Color2 [DarkGray]	1	4		cell cycle [GO:0007049];cell division [GO:0051301];pollen tube growth [GO:0009860]	apoplast [GO:0048046];Golgi apparatus [GO:0005794];mitochondrion [GO:0005739];plasma membrane [GO:0005886];plasmodesma [GO:0009506];vacuole [GO:0005773]	lipid binding [GO:0008289];protease binding [GO:0002020]	+	114	110	110	85.9	84.1	84.1	64.046	0	323.31	557650000000	2719	11833000000	12205000000	10506000000	10272000000	8426900000	8669500000	8147000000	8993800000	45129000000	43253000000	49369000000	41906000000	20488000000	23311000000	22033000000	23135000000	21465000000	15586000000	24014000000	22320000000	32353000000	31290000000
+	5.84697	2.62232	6.15739	Q8VYI3	Q8VYI3	3127	ECH2	Enoyl-CoA hydratase 2, peroxisomal	Color2 [DarkGray]	1	4		fatty acid beta-oxidation, unsaturated, even number [GO:0033542]	mitochondrion [GO:0005739];peroxisome [GO:0005777]	3R-hydroxyacyl-CoA dehydratase activity [GO:0080023];oxidoreductase activity [GO:0016491]	+	24	24	24	66	66	66	34.082	0	323.31	28815000000	311	1291200000	1195400000	924140000	1002400000	1176300000	1362700000	1155800000	1245900000	1664600000	1489500000	2114900000	1958600000	809010000	851530000	1007200000	1088600000	824650000	440490000	895840000	1137900000	1236000000	1359800000
+	5.85437	2.62083	6.15105	Q9LXU5	Q9LXU5	4845	At5g12940	Leucine-rich repeat (LRR) family protein	Color2 [DarkGray]	1	4					+	21	21	21	57.1	57.1	57.1	39.952	0	124.25	10705000000	177	198240000	361300000	99828000	268360000	313220000	305070000	593260000	478720000	718510000	638260000	748600000	674800000	382950000	369700000	490430000	487720000	335480000	277130000	412260000	288400000	627380000	540200000
+	4.90128	2.61765	6.1375	P49243	P49243	1854	At1g62640	3-oxoacyl-[acyl-carrier-protein] synthase III, chloroplastic	Color2 [DarkGray]	1	4		fatty acid biosynthetic process [GO:0006633]	chloroplast [GO:0009507];chloroplast stroma [GO:0009570]	3-oxoacyl-[acyl-carrier-protein] synthase activity [GO:0004315];beta-ketoacyl-acyl-carrier-protein synthase III activity [GO:0033818]	+	19	19	19	54.7	54.7	54.7	42.846	0	323.31	40436000000	342	3307500000	3602800000	2686800000	2609500000	3652400000	3647500000	3247400000	3656300000	1333500000	1185700000	1536300000	1216000000	667260000	624630000	798530000	862980000	739580000	521720000	525480000	593650000	1019000000	992110000
+	5.894	2.61503	6.12635	P0CZ23	P0CZ23	1615	ACX3	Acyl-coenzyme A oxidase 3, peroxisomal	Color2 [DarkGray]	1	4		fatty acid beta-oxidation [GO:0006635];fatty acid beta-oxidation using acyl-CoA oxidase [GO:0033540];lipid homeostasis [GO:0055088];medium-chain fatty acid metabolic process [GO:0051791]	extracellular region [GO:0005576];peroxisome [GO:0005777]	acyl-CoA oxidase activity [GO:0003997];FAD binding [GO:0071949];fatty acid binding [GO:0005504];flavin adenine dinucleotide binding [GO:0050660]	+	48	48	48	63.9	63.9	63.9	75.675	0	323.31	46048000000	610	3039300000	3104900000	2674100000	2582100000	3360800000	2871100000	3091600000	3148000000	2496900000	2069000000	2554000000	2370700000	873920000	952220000	990070000	1006000000	932730000	605650000	921790000	1061400000	1466900000	1276100000
+	4.76705	2.60745	6.09424	Q9M2U7	Q9M2U7	5019	T12E18_90	AT3g54400/T12E18_90	Color2 [DarkGray]	1	4		protein catabolic process [GO:0030163];proteolysis [GO:0006508]	apoplast [GO:0048046];cell wall [GO:0005618];cytosol [GO:0005829]	aspartic-type endopeptidase activity [GO:0004190];DNA binding [GO:0003677]	+	20	20	20	50.4	50.4	50.4	45.475	0	246.67	109050000000	401	657180000	725870000	448110000	638540000	988580000	939010000	840920000	969960000	9322500000	7933500000	11002000000	10058000000	4220000000	4836500000	5555000000	5271300000	4426800000	3178100000	5079300000	4981200000	7578700000	5971200000
+	5.58309	2.60137	6.06862	F4HU51	F4HU51	551	At1g01710	Acyl-CoA thioesterase II	Color2 [DarkGray]	1	4		acyl-CoA metabolic process [GO:0006637];fatty acid catabolic process [GO:0009062]	peroxisome [GO:0005777]	acyl-CoA hydrolase activity [GO:0047617]	+	20	20	20	47.8	47.8	47.8	48.155	0	64.273	8787900000	207	150610000	244180000	167990000	186060000	265330000	282720000	279640000	263160000	602620000	554110000	581610000	568550000	334180000	350830000	393760000	369930000	377880000	262290000	372210000	370110000	470810000	459940000
+	4.89348	2.58642	6.00608	O23138	O23138	1201	CYTC-1	Cytochrome c-1	Color2 [DarkGray]	1	4		gibberellic acid homeostasis [GO:0010336];mitochondrial electron transport, cytochrome c to oxygen [GO:0006123];mitochondrial electron transport, ubiquinol to cytochrome c [GO:0006122]	cytosol [GO:0005829];mitochondrial intermembrane space [GO:0005758];mitochondrion [GO:0005739];nucleus [GO:0005634];respirasome [GO:0070469];vacuolar membrane [GO:0005774]	copper ion binding [GO:0005507];electron transfer activity [GO:0009055];heme binding [GO:0020037]	+	8	8	8	57.9	57.9	57.9	12.394	0	23.85	3917300000	79	93152000	73216000	109680000	62030000	137840000	63624000	132630000	142250000	259780000	242860000	276920000	269470000	184340000	194680000	191590000	189440000	122370000	55333000	95031000	130300000	180070000	229850000
+	4.36712	2.58382	5.99527	Q9FH82	Q9FH82	3971	PAE11	Pectin acetylesterase 11	Color2 [DarkGray]	1	4		cell wall organization [GO:0071555]	cell wall [GO:0005618];cytosol [GO:0005829];extracellular region [GO:0005576];plant-type cell wall [GO:0009505];plasma membrane [GO:0005886];plasmodesma [GO:0009506]	carboxylic ester hydrolase activity [GO:0052689];pectin acetylesterase activity [GO:0052793]	+	32	27	27	87	77	77	42.009	0	323.31	25943000000	274	100230000	69924000	41925000	36707000	185190000	191890000	114530000	222270000	2184400000	2047300000	2086000000	1878400000	1092100000	1188700000	1265400000	1312300000	1294300000	935380000	1221900000	1443300000	2103000000	1619700000
+	5.3315	2.58337	5.99337	Q9XI11	Q9XI11	5835	At1g21670	DPP6 amino-terminal domain protein	Color2 [DarkGray]	1	4			cell wall [GO:0005618];secretory vesicle [GO:0099503]		+	52	50	50	61	61	61	77.288	0	323.31	62684000000	725	131630000	189400000	115210000	124480000	247810000	369030000	297840000	353360000	4887200000	4484400000	5301500000	4791400000	3068300000	3089600000	2964300000	3193200000	3417400000	2443700000	3494900000	3297400000	4514900000	3755300000
+	4.52976	2.58233	5.98904	Q9LEV3	Q9LEV3	4389	CBSX3	CBS domain-containing protein CBSX3, mitochondrial	Color2 [DarkGray]	1	4		cell redox homeostasis [GO:0045454]	cytosol [GO:0005829];mitochondrion [GO:0005739];plasma membrane [GO:0005886]	cobalt ion binding [GO:0050897]	+	25	25	25	77.7	77.7	77.7	22.729	0	323.31	82747000000	567	2244700000	2286400000	1692800000	1786900000	3277000000	3747200000	2870100000	3314900000	5351700000	5232200000	5635000000	4990900000	3142900000	3799400000	3243700000	3340900000	2951800000	2357900000	2924500000	2814300000	3965000000	3848400000
+	4.36171	2.55501	5.8767	O04496	O04496	1108	AED3	Aspartyl protease AED3	Color2 [DarkGray]	1	4		protein catabolic process [GO:0030163];proteolysis [GO:0006508];regulation of programmed cell death [GO:0043067];systemic acquired resistance [GO:0009627]	apoplast [GO:0048046];cell wall [GO:0005618];secretory vesicle [GO:0099503]	aspartic-type endopeptidase activity [GO:0004190];nucleotide binding [GO:0000166]	+	20	20	20	38.8	38.8	38.8	47.661	0	323.31	193030000000	481	127090000	216490000	140380000	207560000	387600000	456960000	334880000	414730000	16089000000	15876000000	17269000000	17188000000	5924400000	8756100000	10070000000	10241000000	9289900000	6683200000	10209000000	10392000000	13797000000	13019000000
+	5.13672	2.5517	5.86324	Q56Z59	Q56Z59	2357	PATL3	Patellin-3	Color2 [DarkGray]	1	4		cell cycle [GO:0007049];cell division [GO:0051301]	cytoplasm [GO:0005737];plasma membrane [GO:0005886]	lipid binding [GO:0008289]	+	62	62	58	80.6	80.6	78.2	56.104	0	323.31	94939000000	875	5178000000	6361900000	4848800000	4640900000	5809600000	6958300000	5584400000	6746200000	4095000000	3966400000	5006900000	4280400000	1660500000	2239700000	2112800000	2282900000	2332400000	1529500000	2621300000	2436500000	3736100000	3483200000
+	3.26024	2.5488	5.85147	Q9ZTW3;B9DH97	Q9ZTW3;B9DH97	5934	VAMP721;SAR1	Vesicle-associated membrane protein 721;AT2G33120 protein	Color2 [DarkGray]	1	4		cell plate formation involved in plant-type cell wall biogenesis [GO:0009920];protein transport [GO:0015031];response to endoplasmic reticulum stress [GO:0034976];vesicle-mediated transport [GO:0016192]	cell plate [GO:0009504];early endosome membrane [GO:0031901];endoplasmic reticulum [GO:0005783];endosome [GO:0005768];integral component of membrane [GO:0016021];plasma membrane [GO:0005886];plasmodesma [GO:0009506];vacuolar membrane [GO:0005774]		+	20	20	19	63.5	63.5	60.3	24.765	0	163.36	11650000000	195	1020400000	1025300000	759270000	834170000	1248900000	1114200000	945680000	975330000	266980000	256010000	454820000	282810000	200380000	191510000	196040000	198760000	186140000	100570000	182190000	191920000	245840000	231630000
+	4.27306	2.54822	5.84911	Q9LNE6	Q9LNE6	4593	UGT89C1	Flavonol 7-O-rhamnosyltransferase	Color2 [DarkGray]	1	4		flavonol biosynthetic process [GO:0051555]	cytosol [GO:0005829];extracellular region [GO:0005576]	UDP-glycosyltransferase activity [GO:0008194]	+	30	30	30	56.6	56.6	56.6	48.122	0	323.31	48282000000	411	5433300000	5478900000	3588200000	3937400000	4846900000	4219000000	3773800000	4806400000	779760000	545090000	1066100000	677800000	359870000	316930000	1254600000	445880000	1037400000	1062000000	950260000	260440000	1361000000	367890000
+	6.82705	2.54375	5.83101	O81235	O81235	1524	MSD1	Superoxide dismutase [Mn] 1, mitochondrial	Color2 [DarkGray]	1	4		defense response to bacterium [GO:0042742];embryo development ending in seed dormancy [GO:0009793];response to zinc ion [GO:0010043]	cytosol [GO:0005829];mitochondrial matrix [GO:0005759];mitochondrion [GO:0005739]	copper ion binding [GO:0005507];manganese ion binding [GO:0030145];metal ion binding [GO:0046872];superoxide dismutase activity [GO:0004784]	+	22	22	22	74.9	74.9	74.9	25.444	0	323.31	44159000000	337	1879000000	1959400000	1526600000	1497200000	1861300000	1964800000	1878700000	1758400000	2105200000	2654000000	3173900000	2591400000	1113400000	1351500000	1443900000	1416500000	945940000	669920000	858520000	1289100000	2774000000	2372100000
+	8.2531	2.53264	5.78628	P46644	P46644	1819	ASP3	Aspartate aminotransferase 3, chloroplastic	Color2 [DarkGray]	1	4		2-oxoglutarate metabolic process [GO:0006103];aspartate metabolic process [GO:0006531];biosynthetic process [GO:0009058];glutamate metabolic process [GO:0006536];leaf senescence [GO:0010150]	chloroplast [GO:0009507];cytosol [GO:0005829];peroxisome [GO:0005777];plasma membrane [GO:0005886];plastid [GO:0009536]	L-aspartate:2-oxoglutarate aminotransferase activity [GO:0004069];pyridoxal phosphate binding [GO:0030170]	+	50	49	44	74.2	74.2	70.8	48.954	0	323.31	76184000000	621	8415800000	9246900000	7285100000	6485300000	7347500000	7660700000	6703700000	6447300000	2196600000	2025700000	2540500000	2559000000	398850000	409860000	479940000	468210000	368850000	267830000	439130000	462720000	999090000	1050200000
+	5.4494	2.53022	5.77658	Q8VYC5	Q8VYC5	3118	At1g18270	Ketose-bisphosphate aldolase class-II family protein	Color2 [DarkGray]	1	4		carbohydrate metabolic process [GO:0005975]		aldehyde-lyase activity [GO:0016832];NAD binding [GO:0051287];NADP binding [GO:0050661];oxidoreductase activity [GO:0016491];zinc ion binding [GO:0008270]	+	109	109	109	69.8	69.8	69.8	147.04	0	323.31	71594000000	733	7391300000	7642400000	6243800000	5783200000	10087000000	11624000000	10057000000	10715000000	294240000	267260000	343430000	348190000	56492000	51554000	27949000	51297000	28992000	12280000	24392000	14791000	158230000	129510000
+	5.65245	2.52654	5.76188	F4K5B9	F4K5B9	1004	MOJ9.20	Eukaryotic aspartyl protease family protein	Color2 [DarkGray]	1	4		protein catabolic process [GO:0030163];proteolysis [GO:0006508]	cell wall [GO:0005618]	aspartic-type endopeptidase activity [GO:0004190]	+	27	27	27	45.9	45.9	45.9	48.694	0	78.707	39559000000	304	926190000	980080000	681980000	602240000	1935900000	1600700000	1599100000	1493300000	3003100000	2387200000	3410300000	3175200000	1247500000	1167500000	1440300000	1442600000	1141300000	1127300000	1291700000	1500500000	1982200000	1872000000
+	5.77548	2.52602	5.7598	Q9LXS6	Q9LXS6	4842	CSY2	Citrate synthase 2, peroxisomal	Color2 [DarkGray]	1	4		carbohydrate metabolic process [GO:0005975];fatty acid beta-oxidation [GO:0006635];tricarboxylic acid cycle [GO:0006099]	cytosol [GO:0005829];mitochondrial matrix [GO:0005759];peroxisome [GO:0005777];plasmodesma [GO:0009506];secretory vesicle [GO:0099503]	citrate (Si)-synthase activity [GO:0004108]	+	25	15	15	50	32.9	32.9	56.602	0	137.65	10768000000	131	543610000	784650000	563090000	601350000	1057000000	996920000	949000000	826660000	522440000	460380000	676690000	685520000	134080000	120030000	155180000	197380000	136820000	87830000	164900000	152430000	228280000	207870000
+	3.90804	2.52081	5.73903	Q9ZW35	Q9ZW35	6029	PCNA2	Proliferating cell nuclear antigen 2	Color2 [DarkGray]	1	4		error-prone translesion synthesis [GO:0042276];leading strand elongation [GO:0006272];mismatch repair [GO:0006298];regulation of DNA replication [GO:0006275];translesion synthesis [GO:0019985]	nucleus [GO:0005634];PCNA complex [GO:0043626]	DNA binding [GO:0003677];DNA polymerase processivity factor activity [GO:0030337]	+	26	26	6	74.2	74.2	27.7	29.222	0	323.31	45488000000	372	3080400000	3254100000	3128800000	2753600000	4067900000	3747500000	3365400000	3917300000	1554000000	1337100000	1611600000	1427900000	907910000	1070100000	899720000	1088900000	749560000	482370000	813180000	730240000	1450200000	1341200000
+	6.14539	2.51743	5.72561	Q9LP45	Q9LP45	4602	RPN6	26S proteasome non-ATPase regulatory subunit 11 homolog	Color2 [DarkGray]	1	4		proteasome assembly [GO:0043248];protein catabolic process [GO:0030163];response to cadmium ion [GO:0046686];ubiquitin-dependent protein catabolic process [GO:0006511]	cytosol [GO:0005829];nucleus [GO:0005634];plasmodesma [GO:0009506];proteasome complex [GO:0000502];proteasome regulatory particle, lid subcomplex [GO:0008541]	structural molecule activity [GO:0005198]	+	41	41	41	76.1	76.1	76.1	46.749	0	323.31	31973000000	288	3066500000	3587000000	3172400000	2590800000	4658500000	4468400000	3919900000	4435000000	252940000	225190000	167710000	213020000	121410000	126320000	112400000	123810000	61192000	67795000	56400000	63393000	103410000	165460000
+	4.77596	2.51564	5.71853	Q9FY49	Q9FY49	4314	LKHA4	Leucine aminopeptidase	Color2 [DarkGray]	1	4		leukotriene biosynthetic process [GO:0019370]	cytosol [GO:0005829]	epoxide hydrolase activity [GO:0004301];metallopeptidase activity [GO:0008237];zinc ion binding [GO:0008270]	+	34	34	34	50.8	50.8	50.8	69.265	0	259.63	14989000000	201	1631700000	1358400000	1280200000	1289600000	1599600000	1584900000	1606800000	1481200000	260480000	314020000	293520000	260630000	146130000	153250000	125500000	154230000	140670000	101560000	157200000	131480000	288000000	217390000
+	3.96154	2.51483	5.71529	Q8RWG8	Q8RWG8	2985	RANBP1B	Ran-binding protein 1 homolog b	Color2 [DarkGray]	1	4		intracellular transport [GO:0046907];mRNA transport [GO:0051028];positive regulation of GTPase activity [GO:0043547];protein transport [GO:0015031]	cytoplasm [GO:0005737];cytosol [GO:0005829];nuclear pore [GO:0005643];nucleus [GO:0005634];peroxisome [GO:0005777]	Ran GTPase binding [GO:0008536]	+	25	19	19	83.9	75.6	75.6	24.389	0	212.11	9830700000	175	629260000	670600000	407030000	514880000	873020000	802950000	869780000	613000000	352930000	389720000	470250000	351270000	220610000	215540000	192850000	251210000	191100000	202000000	218860000	220270000	302350000	301450000
+	4.74751	2.51134	5.70149	Q93VS8	Q93VS8	3286	emb2734	ARM repeat superfamily protein	Color2 [DarkGray]	1	4		positive regulation of primary miRNA processing [GO:2000636];protein import into nucleus [GO:0006606]	cell wall [GO:0005618];cytoplasm [GO:0005737];cytosol [GO:0005829];nucleus [GO:0005634];plastid [GO:0009536]	nuclear import signal receptor activity [GO:0061608];nuclear localization sequence binding [GO:0008139]	+	80	80	80	73.9	73.9	73.9	123.82	0	323.31	148620000000	1401	11242000000	12042000000	9941300000	9795400000	11746000000	12551000000	11080000000	12624000000	4611500000	4336600000	4612900000	4669800000	2590400000	3047200000	3048100000	3137300000	3163700000	1929300000	3294600000	3740600000	3882400000	3346000000
+	5.41368	2.5109	5.69977	Q9ZPI5	Q9ZPI5	5881	MFP2	Peroxisomal fatty acid beta-oxidation multifunctional protein MFP2	Color2 [DarkGray]	1	4		fatty acid beta-oxidation [GO:0006635]	cell wall [GO:0005618];cytosol [GO:0005829];glyoxysome [GO:0009514];nucleolus [GO:0005730];peroxisome [GO:0005777];plasmodesma [GO:0009506]	3-hydroxyacyl-CoA dehydrogenase activity [GO:0003857];3-hydroxybutyryl-CoA epimerase activity [GO:0008692];dodecenoyl-CoA delta-isomerase activity [GO:0004165];enoyl-CoA hydratase activity [GO:0004300];long-chain-enoyl-CoA hydratase activity [GO:0016508]	+	80	80	80	81.5	81.5	81.5	78.839	0	323.31	84655000000	1087	2610700000	2718000000	1815200000	1959000000	2587700000	2368500000	2272100000	2551000000	6706200000	5491500000	7183000000	6590900000	2684700000	2754800000	3079500000	2861600000	2733400000	2329200000	3162700000	3855400000	4424500000	3887100000
+	3.59728	2.509	5.69223	Q93Z30	Q93Z30	3335	At4g18950	AT4g18950/F13C5_120	Color2 [DarkGray]	1	4		integrin-mediated signaling pathway [GO:0007229];regulation of stomatal movement [GO:0010119]	cytoplasm [GO:0005737];cytosol [GO:0005829];nucleus [GO:0005634]	ATP binding [GO:0005524];protein kinase activity [GO:0004672];protein serine/threonine kinase activity [GO:0004674];protein serine/threonine/tyrosine kinase activity [GO:0004712]	+	29	29	29	54.9	54.9	54.9	52.617	0	98.156	10178000000	204	940310000	920230000	844730000	805160000	841970000	1009200000	855310000	1000900000	268630000	247330000	315980000	317690000	105240000	142670000	186870000	120790000	77927000	39496000	126520000	83885000	223650000	121090000
+	4.5913	2.50404	5.67271	O82768	O82768	1601	HISN2	Histidine biosynthesis bifunctional protein hisIE, chloroplastic	Color2 [DarkGray]	1	4		histidine biosynthetic process [GO:0000105]	chloroplast [GO:0009507];chloroplast stroma [GO:0009570];cytosol [GO:0005829]	ATP binding [GO:0005524];phosphoribosyl-AMP cyclohydrolase activity [GO:0004635];phosphoribosyl-ATP diphosphatase activity [GO:0004636]	+	25	25	25	58.7	58.7	58.7	31.667	0	103.6	20933000000	207	199110000	227100000	204080000	171460000	270470000	262470000	249130000	160670000	1417700000	1568300000	1404700000	1407200000	812230000	828470000	1014300000	1132100000	1038000000	680040000	1073400000	1054000000	1670200000	1035400000
+	4.40281	2.49953	5.65499	F4IYF8	F4IYF8	750	At3g02760	Histidine--tRNA ligase, cytoplasmic	Color2 [DarkGray]	1	4		histidyl-tRNA aminoacylation [GO:0006427];mitochondrial translation [GO:0032543]	cytoplasm [GO:0005737];cytosol [GO:0005829];mitochondrion [GO:0005739]	ATP binding [GO:0005524];histidine-tRNA ligase activity [GO:0004821]	+	73	73	73	70.4	70.4	70.4	97.536	0	323.31	38775000000	540	2685400000	2529300000	1927400000	2194500000	5314000000	5134700000	4631300000	4238900000	872210000	853280000	944380000	831370000	475580000	589040000	673290000	687090000	283390000	337400000	404230000	371000000	844100000	659310000
+	4.10839	2.49625	5.64218	Q94C57	Q94C57	3519	UGT73B2	UDP-glucosyl transferase 73B2	Color2 [DarkGray]	1	4		flavonol biosynthetic process [GO:0051555];response to other organism [GO:0051707]	intracellular membrane-bounded organelle [GO:0043231]	flavonol 3-O-glucosyltransferase activity [GO:0047893];flavonol 7-O-beta-glucosyltransferase activity [GO:0033836];quercetin 7-O-glucosyltransferase activity [GO:0080044];UDP-glucosyltransferase activity [GO:0035251];UDP-glycosyltransferase activity [GO:0008194]	+	25	18	18	38.1	29.8	29.8	54.214	0	123.87	13735000000	111	1997700000	2165900000	1580400000	1678900000	1089100000	1170100000	1135100000	1048200000	231090000	244360000	183090000	191590000	34113000	39097000	79458000	78167000	42681000	58383000	37452000	95840000	117410000	148720000
+	4.31469	2.49625	5.64217	Q9SAL0	Q9SAL0	5212	RGLG4	E3 ubiquitin-protein ligase RGLG4	Color2 [DarkGray]	1	4		defense response to bacterium [GO:0042742];jasmonic acid mediated signaling pathway [GO:0009867];response to wounding [GO:0009611]	cytoplasm [GO:0005737];mitochondrion [GO:0005739];nucleus [GO:0005634]	metal ion binding [GO:0046872];ubiquitin-protein transferase activity [GO:0004842]	+	17	17	17	51.1	51.1	51.1	43.73	0	156.8	9088500000	195	337270000	401220000	253500000	274980000	333240000	367780000	363270000	291520000	439880000	542830000	469570000	389970000	369090000	366880000	364600000	310600000	320770000	222390000	377150000	341890000	450680000	455210000
+	5.46349	2.49167	5.62429	Q43314	Q43314	2312	GDH1	Glutamate dehydrogenase 1	Color2 [DarkGray]	1	4		glutamate catabolic process [GO:0006538];nitrogen compound metabolic process [GO:0006807];response to absence of light [GO:0009646];response to cadmium ion [GO:0046686]	mitochondrion [GO:0005739];plastid [GO:0009536]	ATP binding [GO:0005524];cobalt ion binding [GO:0050897];copper ion binding [GO:0005507];glutamate dehydrogenase (NAD+) activity [GO:0004352];glutamate dehydrogenase [NAD(P)+] activity [GO:0004353];zinc ion binding [GO:0008270]	+	45	36	26	73.2	66.7	49.4	44.524	0	323.31	74667000000	620	2287200000	2495700000	2127700000	2127100000	5929900000	6181000000	5283100000	5807400000	4514700000	3280400000	4493800000	3393300000	1444800000	2054900000	2001400000	2266600000	2041900000	1656100000	2117500000	2082600000	2822100000	2369500000
+	3.82286	2.48387	5.59398	Q9FHY8	Q9FHY8	3991	HLB1	Protein HLB1	Color2 [DarkGray]	1	4		exocytosis [GO:0006887];root hair cell development [GO:0080147];root hair cell tip growth [GO:0048768];root hair elongation [GO:0048767];vesicle-mediated transport [GO:0016192]	cytosol [GO:0005829];early endosome [GO:0005769];membrane [GO:0016020];plastid [GO:0009536];trans-Golgi network [GO:0005802]		+	27	27	27	42.7	42.7	42.7	62.397	0	323.31	22561000000	199	2744500000	2825200000	2005800000	1961700000	3284100000	2699900000	3275900000	2779300000	108790000	98566000	124260000	145190000	30858000	39204000	41457000	47002000	23073000	32493000	30773000	39222000	35695000	67740000
+	4.95342	2.48136	5.58422	Q940M2	Q940M2	3387	AGT2	Alanine--glyoxylate aminotransferase 2 homolog 1, mitochondrial	Color2 [DarkGray]	1	4		photorespiration [GO:0009853];response to cadmium ion [GO:0046686]	mitochondrion [GO:0005739];plasma membrane [GO:0005886];vacuolar membrane [GO:0005774]	alanine-glyoxylate transaminase activity [GO:0008453];pyridoxal phosphate binding [GO:0030170];zinc ion binding [GO:0008270]	+	42	42	42	88.2	88.2	88.2	51.952	0	323.31	103090000000	874	6558300000	7828800000	5530900000	5613500000	8893100000	9090600000	7442200000	8603700000	3802100000	3535100000	4447400000	4234300000	1592500000	1969000000	2274900000	2018300000	2360900000	1462400000	2332700000	2153300000	2637500000	2646400000
+	4.75345	2.47411	5.55624	Q9ZQP2	Q9ZQP2	5904	ACX1.2	Putative peroxisomal acyl-coenzyme A oxidase 1.2	Color2 [DarkGray]	1	4		fatty acid beta-oxidation using acyl-CoA oxidase [GO:0033540];lipid homeostasis [GO:0055088];long-chain fatty acid metabolic process [GO:0001676]	endoplasmic reticulum [GO:0005783];peroxisome [GO:0005777]	acyl-CoA oxidase activity [GO:0003997];FAD binding [GO:0071949];fatty acid binding [GO:0005504];flavin adenine dinucleotide binding [GO:0050660]	+	24	17	17	35.5	25.8	25.8	74.297	0	66.302	3295500000	65	129480000	100230000	69232000	49450000	104150000	120480000	104540000	106570000	336930000	291260000	423120000	329060000	87160000	94978000	70498000	102940000	83784000	53778000	110220000	101170000	133150000	79316000
+	3.48463	2.47358	5.5542	Q8LDW8	Q8LDW8	2906	GLX2-4	Probable hydroxyacylglutathione hydrolase 2, chloroplastic	Color2 [DarkGray]	1	4		methylglyoxal catabolic process to D-lactate via S-lactoyl-glutathione [GO:0019243]	chloroplast [GO:0009507]	hydroxyacylglutathione hydrolase activity [GO:0004416];metal ion binding [GO:0046872]	+	15	15	11	46.5	46.5	36.3	36.625	0	143.31	10603000000	188	222280000	322500000	161670000	151610000	491600000	355220000	295240000	288930000	777240000	691560000	1031700000	778360000	372560000	424990000	474810000	332590000	344330000	292940000	361940000	350400000	536510000	520610000
+	3.67189	2.47264	5.55057	O48963	O48963	1302	PHOT1	Phototropin-1	Color2 [DarkGray]	1	4		chloroplast accumulation movement [GO:0009904];chloroplast avoidance movement [GO:0009903];circadian rhythm [GO:0007623];negative regulation of anion channel activity by blue light [GO:0010362];phototropism [GO:0009638];protein autophosphorylation [GO:0046777];protein phosphorylation [GO:0006468];protein-chromophore linkage [GO:0018298];regulation of proton transport [GO:0010155];regulation of st…	cell surface [GO:0009986];cytoplasm [GO:0005737];cytoplasmic side of plasma membrane [GO:0009898];nucleus [GO:0005634];plasma membrane [GO:0005886];vacuole [GO:0005773]	ATP binding [GO:0005524];blue light photoreceptor activity [GO:0009882];FMN binding [GO:0010181];identical protein binding [GO:0042802];kinase activity [GO:0016301];mRNA binding [GO:0003729];protein kinase activity [GO:0004672];protein serine/threonine kinase activity [GO:0004674]	+	37	37	35	38.6	38.6	35.8	111.69	0	234.17	18636000000	230	0	23578000	0	12276000	9030000	9024000	18955000	9120500	1812100000	1689600000	1950500000	1795900000	980610000	1031100000	896010000	1119800000	789730000	653890000	779630000	796750000	938290000	953930000
+	9.56878	2.47223	5.54902	P49078	P49078	1844	ASN1	Asparagine synthetase [glutamine-hydrolyzing] 1	Color2 [DarkGray]	1	4		asparagine biosynthetic process [GO:0006529];cellular amino acid catabolic process [GO:0009063];cellular response to sucrose starvation [GO:0043617];glutamine metabolic process [GO:0006541];L-asparagine biosynthetic process [GO:0070981];response to absence of light [GO:0009646];response to fructose [GO:0009750];response to glucose [GO:0009749];response to sucrose [GO:0009744]	cytosol [GO:0005829]	asparagine synthase (glutamine-hydrolyzing) activity [GO:0004066];ATP binding [GO:0005524]	+	45	45	37	64.6	64.6	57.7	65.62	0	323.31	29104000000	252	446000000	568420000	306340000	313570000	544400000	414930000	518470000	530380000	5866000000	4774100000	6247100000	6021800000	106090000	185440000	289250000	172850000	116750000	74580000	111270000	130530000	406700000	367280000
+	6.53358	2.47167	5.54687	Q56YA5	Q56YA5	2351	AGT1	Serine--glyoxylate aminotransferase	Color2 [DarkGray]	1	4		glycine biosynthetic process, by transamination of glyoxylate [GO:0019265];photorespiration [GO:0009853]	apoplast [GO:0048046];chloroplast [GO:0009507];chloroplast stroma [GO:0009570];cytosol [GO:0005829];mitochondrion [GO:0005739];peroxisome [GO:0005777];plasma membrane [GO:0005886]	alanine-glyoxylate transaminase activity [GO:0008453];serine-glyoxylate transaminase activity [GO:0050281];serine-pyruvate transaminase activity [GO:0004760]	+	48	48	47	88.5	88.5	88.5	44.207	0	323.31	365750000000	1075	16011000	16262000	36640000	8983100	79200000	56356000	38185000	29256000	27973000000	28395000000	29510000000	27533000000	18340000000	20159000000	24559000000	22676000000	14836000000	11055000000	15605000000	14978000000	29706000000	26105000000
+	5.82474	2.47014	5.54096	Q9LMK7	Q9LMK7	4572	RANBP1A	Ran-binding protein 1 homolog a	Color2 [DarkGray]	1	4		intracellular transport [GO:0046907];mRNA transport [GO:0051028];positive regulation of GTPase activity [GO:0043547];protein transport [GO:0015031]	cytoplasm [GO:0005737];cytosol [GO:0005829];extracellular region [GO:0005576];nuclear pore [GO:0005643];nucleus [GO:0005634]	Ran GTPase binding [GO:0008536]	+	37	37	28	84.2	84.2	80.3	25.601	0	323.31	63663000000	571	3796600000	4020000000	3278700000	3248200000	4941300000	4605200000	4492500000	4248300000	2866900000	3014900000	3080400000	2920400000	1241200000	1258000000	1612500000	1243800000	1237300000	1039800000	1579500000	1599600000	2069800000	2149200000
+	4.53134	2.46511	5.5217	O22957	O22957	1189	At2g34040	Apoptosis inhibitory protein 5 (API5)	Color2 [DarkGray]	1	4		regulation of programmed cell death [GO:0043067]	cytosol [GO:0005829];endoplasmic reticulum [GO:0005783];nucleus [GO:0005634];plasmodesma [GO:0009506]	mRNA binding [GO:0003729];RNA binding [GO:0003723]	+	38	38	35	59.1	59.1	56.1	61.644	0	314.62	18175000000	363	794650000	921770000	713040000	716180000	1290200000	1265200000	1042200000	1100500000	902020000	820230000	912200000	832870000	385680000	479070000	440930000	538100000	466290000	259460000	469670000	512410000	838460000	731660000
+	3.64331	2.4648	5.52052	Q9M8T0	Q9M8T0	5076	At3g02880	Probable inactive receptor kinase At3g02880	Color2 [DarkGray]	1	4		response to abscisic acid [GO:0009737]	anchored component of plasma membrane [GO:0046658];cell wall [GO:0005618];cytosol [GO:0005829];integral component of membrane [GO:0016021];plant-type cell wall [GO:0009505];plasma membrane [GO:0005886];plasmodesma [GO:0009506]	ATP binding [GO:0005524];protein kinase activity [GO:0004672]	+	27	27	20	46.7	46.7	39.1	67.752	0	222.26	18098000000	246	1156900000	1165600000	942680000	900330000	977500000	1077000000	879890000	855590000	668770000	616470000	871960000	800000000	439960000	507170000	649930000	628700000	540860000	398990000	495530000	694980000	605900000	789710000
+	3.00731	2.46383	5.5168	Q96524	Q96524	3616	CRY2	Cryptochrome-2	Color2 [DarkGray]	1	4		blue light signaling pathway [GO:0009785];chromatin organization [GO:0006325];chromatin remodeling [GO:0006338];circadian regulation of calcium ion oscillation [GO:0010617];circadian rhythm [GO:0007623];defense response to virus [GO:0051607];flavin adenine dinucleotide metabolic process [GO:0072387];long-day photoperiodism, flowering [GO:0048574];phosphorylation [GO:0016310];phototropism [GO:0009…	cytoplasm [GO:0005737];nuclear body [GO:0016604];nucleus [GO:0005634];PML body [GO:0016605];vacuole [GO:0005773]	ATP binding [GO:0005524];blue light photoreceptor activity [GO:0009882];FAD binding [GO:0071949];identical protein binding [GO:0042802];metal ion binding [GO:0046872]	+	12	12	12	20.3	20.3	20.3	69.456	0	13.756	1939200000	38	16151000	29089000	9840300	28743000	19659000	12828000	19470000	10486000	281940000	249120000	285470000	209680000	71764000	67142000	84176000	65109000	9553700	19256000	34849000	63910000	93779000	97499000
+	6.3275	2.46208	5.51011	Q8LBB2	Q8LBB2	2866	KING1	SNF1-related protein kinase regulatory subunit gamma-1	Color2 [DarkGray]	1	4		carbohydrate metabolic process [GO:0005975];fatty acid biosynthetic process [GO:0006633];nitrate assimilation [GO:0042128]		ATP binding [GO:0005524];protein kinase regulator activity [GO:0019887]	+	29	29	29	64.2	64.2	64.2	47.422	0	203.36	33135000000	370	1890400000	2220500000	1544600000	1491700000	2387800000	2691500000	2425200000	2569300000	1426900000	1714900000	1972000000	1893400000	589930000	775590000	806670000	814290000	781010000	458710000	779470000	686380000	785460000	775820000
+	2.94708	2.45932	5.49957	Q96266	Q96266	3598	GSTF8	Glutathione S-transferase F8, chloroplastic	Color2 [DarkGray]	1	4		cellular response to hypoxia [GO:0071456];defense response [GO:0006952];defense response to bacterium [GO:0042742];glutathione metabolic process [GO:0006749];response to cold [GO:0009409];response to karrikin [GO:0080167];toxin catabolic process [GO:0009407]	chloroplast [GO:0009507];chloroplast envelope [GO:0009941];chloroplast stroma [GO:0009570];cytoplasm [GO:0005737];cytosol [GO:0005829];nucleus [GO:0005634];stromule [GO:0010319];thylakoid [GO:0009579];vacuolar membrane [GO:0005774]	glutathione binding [GO:0043295];glutathione transferase activity [GO:0004364];peroxidase activity [GO:0004601]	+	37	37	36	79.8	79.8	79.8	29.231	0	323.31	99156000000	422	14613000000	15008000000	10794000000	10554000000	10984000000	10853000000	11245000000	10965000000	532070000	654230000	547980000	435730000	234980000	235920000	121430000	281750000	119320000	151900000	79842000	195270000	133870000	126030000
+	5.16381	2.45743	5.49238	Q9FZ48	Q9FZ48	4338	UBC36	Ubiquitin-conjugating enzyme E2 36	Color2 [DarkGray]	1	4		postreplication repair [GO:0006301];protein K63-linked ubiquitination [GO:0070534];protein polyubiquitination [GO:0000209]	nucleus [GO:0005634]	ATP binding [GO:0005524];ubiquitin conjugating enzyme activity [GO:0061631]	+	19	19	5	90.2	90.2	24.2	17.22	0	201.98	26132000000	327	1205500000	1146700000	977740000	940600000	1353300000	1807400000	1714100000	1697400000	987500000	1138500000	1441600000	1084300000	810430000	744320000	802890000	739140000	674210000	608690000	805920000	682500000	1322500000	1093000000
+	4.42811	2.457	5.49074	O23264	O23264	1216	SBP1	Selenium-binding protein 1	Color2 [DarkGray]	1	4		cellular response to selenium ion [GO:0071291];response to cadmium ion [GO:0046686];response to hydrogen peroxide [GO:0042542];sulfate assimilation [GO:0000103]	cytosol [GO:0005829];plasmodesma [GO:0009506]	selenium binding [GO:0008430]	+	47	37	37	91	84.3	84.3	54.056	0	323.31	72276000000	642	3998500000	3968100000	3374300000	3375400000	4850000000	5298000000	5159000000	4738100000	3118100000	2913400000	2875200000	2865300000	1840700000	1868500000	1968800000	1995600000	1982300000	1226100000	1649300000	1874900000	3057300000	2933200000
+	3.99726	2.45457	5.4815	Q9FKP8	Q9FKP8	4097	ZHD1	Zinc-finger homeodomain protein 1	Color2 [DarkGray]	1	4		regulation of gibberellin biosynthetic process [GO:0010371];regulation of transcription, DNA-templated [GO:0006355];seed maturation [GO:0010431]	nucleus [GO:0005634]	DNA binding [GO:0003677];metal ion binding [GO:0046872];protein homodimerization activity [GO:0042803]	+	6	6	6	19.7	19.7	19.7	31.098	0	7.3807	1256100000	35	0	0	0	0	0	0	0	0	123930000	91480000	150150000	107150000	55664000	71021000	71368000	70095000	82462000	35422000	74519000	45131000	90600000	40173000
+	4.98303	2.45119	5.46866	Q9FE06	Q9FE06	3863	EXL2	Protein EXORDIUM-like 2	Color2 [DarkGray]	1	4		cellular response to hypoxia [GO:0071456]	apoplast [GO:0048046];cell wall [GO:0005618];cytosol [GO:0005829];extracellular space [GO:0005615];Golgi apparatus [GO:0005794];plant-type cell wall [GO:0009505];plasmodesma [GO:0009506];plastid [GO:0009536]		+	13	9	9	40	30.5	30.5	32.674	0	92.351	4651200000	105	16065000	31767000	17242000	20468000	87031000	126860000	123550000	135580000	476050000	454270000	546710000	459710000	158830000	156000000	173240000	202350000	143390000	101230000	175280000	212190000	248970000	171550000
+	3.97965	2.44754	5.45485	Q9MAH3	Q9MAH3	5111	DJ1B	Protein DJ-1 homolog B	Color2 [DarkGray]	1	4		guanine deglycation, glyoxal removal [GO:0106046];protein deglycation, glyoxal removal [GO:0036529]	chloroplast [GO:0009507];chloroplast stroma [GO:0009570];cytosol [GO:0005829];nucleus [GO:0005634]	glyoxalase III activity [GO:0019172];protein deglycase activity [GO:0036524]	+	42	42	42	68.5	68.5	68.5	46.99	0	323.31	59416000000	681	1410800000	1561600000	1040200000	957750000	1811600000	1931400000	1618000000	1818300000	3562500000	2929900000	4193900000	4054400000	1922100000	2360000000	2354000000	2439000000	2856600000	1260100000	2765300000	2871000000	3102600000	3532300000
+	4.82072	2.44485	5.44469	Q9LFF9	Q9LFF9	4417	PPA4	Soluble inorganic pyrophosphatase 4	Color2 [DarkGray]	1	4		phosphate-containing compound metabolic process [GO:0006796];response to cadmium ion [GO:0046686]	cytosol [GO:0005829];nucleoplasm [GO:0005654]	inorganic diphosphatase activity [GO:0004427];magnesium ion binding [GO:0000287]	+	12	4	4	47.2	31	31	24.576	0	16.199	700690000	16	20275000	109960000	59770000	69077000	84667000	86502000	65991000	93122000	39375000	21634000	33395000	16921000	0	0	0	0	0	0	0	0	0	0
+	4.67061	2.44485	5.44468	P55852	P55852	1910	SUMO1	Small ubiquitin-related modifier 1	Color2 [DarkGray]	1	4		heat acclimation [GO:0010286];negative regulation of DNA-binding transcription factor activity [GO:0043433];protein sumoylation [GO:0016925];response to heat [GO:0009408]	cytoplasm [GO:0005737];cytosol [GO:0005829];nucleus [GO:0005634]	protein tag [GO:0031386];ubiquitin-like protein ligase binding [GO:0044389]	+	7	7	3	49	49	28	10.976	0	23.968	3903900000	71	83652000	65502000	84431000	61505000	79112000	110550000	69106000	129780000	249480000	231700000	324200000	294070000	78392000	199690000	215260000	187330000	143640000	139920000	136910000	208730000	204220000	242460000
+	5.54237	2.44281	5.43701	Q9LF41	Q9LF41	4403	PUB1	Probable ubiquitin conjugation factor E4	Color2 [DarkGray]	1	4		protein polyubiquitination [GO:0000209];protein ubiquitination [GO:0016567];ubiquitin-dependent ERAD pathway [GO:0030433];ubiquitin-dependent protein catabolic process [GO:0006511]	cytoplasm [GO:0005737];cytosol [GO:0005829];nucleus [GO:0005634];ubiquitin ligase complex [GO:0000151]	ubiquitin protein ligase activity [GO:0061630];ubiquitin-ubiquitin ligase activity [GO:0034450]	+	55	55	55	56.3	56.3	56.3	117.53	0	290.39	25649000000	442	2172800000	2335300000	1589300000	1807500000	2121200000	2204200000	2214800000	2065400000	665250000	716550000	833230000	716070000	370560000	523230000	512680000	468020000	436630000	270540000	399140000	432230000	786140000	604930000
+	5.01172	2.44131	5.43135	Q9FLP0	Q9FLP0	4132	MAP65-1	65-kDa microtubule-associated protein 1	Color2 [DarkGray]	1	4		cortical microtubule organization [GO:0043622];cytokinesis by cell plate formation [GO:0000911];microtubule cytoskeleton organization [GO:0000226]	cell cortex [GO:0005938];cytoplasm [GO:0005737];microtubule [GO:0005874];nucleus [GO:0005634];phragmoplast [GO:0009524];spindle [GO:0005819]	microtubule binding [GO:0008017];protein dimerization activity [GO:0046983]	+	23	23	18	37	37	29	65.784	0	126.08	13798000000	240	1048500000	912300000	305280000	297840000	491960000	568440000	642340000	588520000	878980000	785470000	1021800000	919070000	415460000	436010000	497170000	468480000	458300000	290070000	433630000	423320000	471540000	435120000
+	3.23236	2.43248	5.39822	Q9LU64	Q9LU64	4738	FSD2	Superoxide dismutase [Fe] 2, chloroplastic	Color2 [DarkGray]	1	4		oxidation-reduction process [GO:0055114];response to UV [GO:0009411]	chloroplast [GO:0009507];chloroplast nucleoid [GO:0042644];chloroplast thylakoid [GO:0009534];thylakoid [GO:0009579]	metal ion binding [GO:0046872];superoxide dismutase activity [GO:0004784]	+	9	9	9	28.2	28.2	28.2	34.663	0	19.864	1034100000	44	0	0	0	6547200	0	0	0	0	127440000	135330000	160090000	149110000	27572000	26505000	32887000	40301000	20056000	19148000	21818000	50561000	50563000	51223000
+	3.80228	2.43048	5.39071	F4KDK1	F4KDK1	1047	MCK7.7	Calcineurin-like metallo-phosphoesterase superfamily protein	Color2 [DarkGray]	1	4				hydrolase activity [GO:0016787]	+	11	11	11	37.2	37.2	37.2	34.08	0	44.196	2761100000	92	21853000	28323000	79358000	31380000	63813000	87160000	40624000	45424000	206100000	189470000	256700000	196440000	107080000	139050000	154850000	135050000	80876000	88976000	90197000	54683000	192240000	161530000
+	9.35003	2.42767	5.38024	Q42605	Q42605	2305	UGE1	Bifunctional UDP-glucose 4-epimerase and UDP-xylose 4-epimerase 1	Color2 [DarkGray]	1	4		capsule polysaccharide biosynthetic process [GO:0045227];cell wall organization [GO:0071555];galactose metabolic process [GO:0006012];rRNA processing [GO:0006364];UDP-L-arabinose biosynthetic process [GO:0033358]	cytosol [GO:0005829];plasma membrane [GO:0005886]	RNA binding [GO:0003723];UDP-arabinose 4-epimerase activity [GO:0050373];UDP-glucose 4-epimerase activity [GO:0003978]	+	45	45	32	94.3	94.3	77.8	39.157	0	323.31	25130000000	477	252360000	369870000	226320000	239210000	358190000	326080000	239360000	359170000	3606500000	3616700000	3761100000	3515000000	410200000	633310000	646100000	630140000	577410000	289970000	650660000	640500000	986580000	925380000
+	4.58133	2.42206	5.35936	Q93YR3	Q93YR3	3322	At4g22670	FAM10 family protein At4g22670	Color2 [DarkGray]	1	4		chaperone cofactor-dependent protein refolding [GO:0051085];chaperone-mediated protein folding [GO:0061077];protein-containing complex assembly [GO:0065003];response to cadmium ion [GO:0046686]	cytosol [GO:0005829]	heat shock protein binding [GO:0031072];protein dimerization activity [GO:0046983]	+	30	30	30	50.6	50.6	50.6	46.621	0	323.31	26538000000	405	642600000	748240000	580490000	517230000	1200400000	1348300000	1114100000	1240800000	1709500000	1651000000	1954600000	1768000000	875470000	865560000	814050000	738500000	1094800000	544810000	1091200000	942110000	1316100000	1271500000
+	5.14013	2.41985	5.35115	Q8L785	Q8L785	2795	EDD1	Glycine--tRNA ligase, chloroplastic/mitochondrial 2	Color2 [DarkGray]	1	4		embryo development ending in seed dormancy [GO:0009793];glycyl-tRNA aminoacylation [GO:0006426];regulation of embryonic development [GO:0045995]	chloroplast [GO:0009507];chloroplast stroma [GO:0009570];mitochondrion [GO:0005739]	ATP binding [GO:0005524];glycine-tRNA ligase activity [GO:0004820];protein dimerization activity [GO:0046983]	+	36	36	36	39.9	39.9	39.9	119.77	0	178.16	11477000000	294	194960000	200370000	119200000	93861000	235700000	198310000	187880000	251540000	951530000	769970000	1027700000	1003300000	374650000	341800000	413870000	495020000	329670000	221630000	334210000	252990000	928150000	797750000
+	3.79151	2.41967	5.3505	P25865	P25865	1687	UBC1	Ubiquitin-conjugating enzyme E2 1	Color2 [DarkGray]	1	4		DNA repair [GO:0006281];histone H2B ubiquitination [GO:0033523];histone ubiquitination [GO:0016574];proteasome-mediated ubiquitin-dependent protein catabolic process [GO:0043161];protein polyubiquitination [GO:0000209];ubiquitin-dependent protein catabolic process [GO:0006511];vegetative to reproductive phase transition of meristem [GO:0010228]	cytoplasm [GO:0005737];cytosol [GO:0005829]	ATP binding [GO:0005524];ubiquitin conjugating enzyme activity [GO:0061631];ubiquitin-protein transferase activity [GO:0004842]	+	3	3	2	19.1	19.1	7.9	17.281	0	33.983	3380800000	51	216950000	242620000	199640000	193620000	272620000	239710000	287350000	259350000	135890000	124090000	112330000	106040000	70615000	93433000	79096000	62074000	71743000	64377000	78200000	79011000	119150000	84003000
+	2.63459	2.41403	5.3296	Q9LD43;REV__F4JG55	Q9LD43	4356	CAC3	Acetyl-coenzyme A carboxylase carboxyl transferase subunit alpha, chloroplastic	Color2 [DarkGray]	1	4		fatty acid biosynthetic process [GO:0006633];malonyl-CoA biosynthetic process [GO:2001295]	acetyl-CoA carboxylase complex [GO:0009317];chloroplast [GO:0009507];chloroplast envelope [GO:0009941];chloroplast inner membrane [GO:0009706];chloroplast stroma [GO:0009570];endoplasmic reticulum [GO:0005783];plastid [GO:0009536]	acetyl-CoA carboxylase activity [GO:0003989];ATP binding [GO:0005524];transferase activity [GO:0016740]	+	79	79	79	79.3	79.3	79.3	85.305	0	323.31	37810000000	393	3915000000	4606500000	3464500000	3627900000	4303800000	5233800000	5771400000	5769700000	202330000	269740000	142720000	82837000	43520000	27426000	30262000	28663000	14050000	0	22920000	32745000	28207000	65123000
+	5.9569	2.41246	5.32383	Q9S850	Q9S850	5176	SOX	Sulfite oxidase	Color2 [DarkGray]	1	4		chlorophyll metabolic process [GO:0015994];response to sulfur dioxide [GO:0010477];sulfur compound metabolic process [GO:0006790]	cytosol [GO:0005829];mitochondrion [GO:0005739];peroxisome [GO:0005777]	heme binding [GO:0020037];molybdenum ion binding [GO:0030151];molybdopterin cofactor binding [GO:0043546];sulfite oxidase activity [GO:0008482]	+	42	42	42	86.8	86.8	86.8	43.329	0	323.31	140010000000	845	4621300000	3826800000	3679700000	3272400000	4538600000	4741500000	4266000000	3781800000	8914300000	8273900000	8176100000	7246400000	5442800000	6628400000	5831600000	6536400000	6019600000	4677000000	6347000000	6065200000	7573100000	6268700000
+	4.27447	2.41103	5.31854	Q9FHI1	Q9FHI1	3981	MOB1A	MOB kinase activator-like 1A	Color2 [DarkGray]	1	4		auxin-activated signaling pathway [GO:0009734];cell division [GO:0051301];embryo sac development [GO:0009553];gametophyte development [GO:0048229];megasporogenesis [GO:0009554];microsporogenesis [GO:0009556];organ growth [GO:0035265];root development [GO:0048364];root meristem growth [GO:0010449]	cytoplasm [GO:0005737];early endosome [GO:0005769];nucleus [GO:0005634];plant-type vacuole membrane [GO:0009705];plasma membrane [GO:0005886];trans-Golgi network [GO:0005802]	metal ion binding [GO:0046872]	+	13	13	13	50.2	50.2	50.2	24.696	0	55.626	6956900000	134	495430000	510370000	416460000	383110000	517380000	495080000	417420000	570590000	146290000	262250000	204530000	240420000	177900000	119290000	218380000	138420000	166640000	140110000	235610000	184100000	232300000	241720000
+	4.05975	2.40747	5.30545	Q8H103	Q8H103	2712	PGI1	Glucose-6-phosphate isomerase 1, chloroplastic	Color2 [DarkGray]	1	4		gluconeogenesis [GO:0006094];glucose 6-phosphate metabolic process [GO:0051156];glycolytic process [GO:0006096];positive regulation of flower development [GO:0009911];starch metabolic process [GO:0005982]	chloroplast [GO:0009507];chloroplast envelope [GO:0009941];chloroplast stroma [GO:0009570];cytosol [GO:0005829];plastid [GO:0009536]	glucose-6-phosphate isomerase activity [GO:0004347];monosaccharide binding [GO:0048029]	+	57	57	57	81.1	81.1	81.1	67.048	0	323.31	188800000000	1445	8564900000	9620500000	7411600000	7200200000	8975300000	10277000000	9363100000	9817400000	8601400000	7962700000	9881700000	8450300000	5757400000	6036900000	6138900000	6635700000	6040500000	4082700000	6056700000	6358600000	9446300000	8297700000
+	6.47574	2.40633	5.30125	O80526	O80526	1449	ACLA-3	ATP-citrate synthase alpha chain protein 3	Color2 [DarkGray]	1	4		acetyl-CoA biosynthetic process [GO:0006085];lipid metabolic process [GO:0006629]	citrate lyase complex [GO:0009346];cytosol [GO:0005829];extracellular region [GO:0005576]	ATP binding [GO:0005524];ATP citrate synthase activity [GO:0003878]	+	37	26	26	62.5	52.6	52.6	46.945	0	323.31	49422000000	523	3728800000	3926000000	3117400000	3147900000	4286700000	4309200000	3958000000	3877800000	1447100000	1283000000	1488900000	1139000000	1022200000	1064300000	1080600000	1096200000	809430000	660490000	810160000	823360000	1550200000	1496300000
+	4.80114	2.40535	5.29763	Q9LJL3	Q9LJL3	4515	PREP1	Presequence protease 1, chloroplastic/mitochondrial	Color2 [DarkGray]	1	4		protein processing [GO:0016485];response to cadmium ion [GO:0046686]	apoplast [GO:0048046];chloroplast [GO:0009507];chloroplast envelope [GO:0009941];chloroplast stroma [GO:0009570];cytosol [GO:0005829];mitochondrial matrix [GO:0005759];mitochondrion [GO:0005739]	metal ion binding [GO:0046872];metalloendopeptidase activity [GO:0004222]	+	127	127	102	81	81	70.6	121.01	0	323.31	403790000000	2433	4407000000	4818300000	3688000000	3686200000	3206000000	3252700000	3158100000	3357400000	28601000000	27149000000	30236000000	31962000000	17407000000	18942000000	17530000000	18058000000	21659000000	15895000000	20905000000	21045000000	27674000000	25137000000
+	8.42802	2.40109	5.28202	P24806	P24806	1672	XTH24	Xyloglucan endotransglucosylase/hydrolase protein 24	Color2 [DarkGray]	1	4		cell wall biogenesis [GO:0042546];plant-type cell wall loosening [GO:0009828];plant-type cell wall organization or biogenesis [GO:0071669];xyloglucan metabolic process [GO:0010411]	apoplast [GO:0048046];cell wall [GO:0005618];cytoplasm [GO:0005737];Golgi apparatus [GO:0005794];plant-type cell wall [GO:0009505];plasma membrane [GO:0005886];secretory vesicle [GO:0099503]	hydrolase activity, hydrolyzing O-glycosyl compounds [GO:0004553];xyloglucan:xyloglucosyl transferase activity [GO:0016762]	+	38	38	36	74.3	74.3	74.3	30.755	0	323.31	119150000000	593	205540000	281260000	258530000	151600000	607000000	606000000	596640000	661040000	24656000000	21284000000	23525000000	19822000000	2185800000	2549200000	2310300000	2554800000	2004000000	1441100000	1917700000	2104100000	2551000000	2085800000
+	3.63308	2.3989	5.27402	Q9FNK4	Q9FNK4	4220	DELTA-OAT	Ornithine aminotransferase, mitochondrial	Color2 [DarkGray]	1	4		arginine catabolic process to glutamate [GO:0019544];arginine catabolic process to proline via ornithine [GO:0010121];defense response to bacterium, incompatible interaction [GO:0009816];hyperosmotic salinity response [GO:0042538];mitochondrion localization [GO:0051646];ornithine catabolic process [GO:0006593];plant-type hypersensitive response [GO:0009626];proline biosynthetic process [GO:000656…	cytoplasm [GO:0005737];mitochondrial matrix [GO:0005759];mitochondrion [GO:0005739];plastid [GO:0009536]	identical protein binding [GO:0042802];ornithine(lysine) transaminase activity [GO:0050155];ornithine-oxo-acid transaminase activity [GO:0004587];pyridoxal phosphate binding [GO:0030170];zinc ion binding [GO:0008270]	+	15	15	15	35.8	35.8	35.8	52.177	0	92.689	5113100000	99	333540000	306210000	233940000	214780000	296950000	284060000	271100000	269500000	360430000	341770000	436210000	256810000	56661000	71336000	141410000	78206000	112400000	29353000	117780000	100540000	221120000	183490000
+	2.85117	2.39141	5.24669	Q8GWP4	Q8GWP4	2646	At2g21530	At2g21530	Color2 [DarkGray]	1	4			chloroplast [GO:0009507];chloroplast stroma [GO:0009570];chloroplast thylakoid membrane [GO:0009535];vacuole [GO:0005773]	mRNA binding [GO:0003729]	+	6	6	6	48.3	48.3	48.3	22.675	0	17.15	1584100000	35	0	0	10359000	35547000	0	0	28280000	0	201010000	225170000	218730000	192840000	48544000	78241000	78503000	44943000	24260000	13095000	92838000	55562000	104060000	53883000
+	2.94452	2.38826	5.23527	P92974	P92974	1966	UBA2	Ubiquitin-activating enzyme E1 2	Color2 [DarkGray]	1	4		cellular response to DNA damage stimulus [GO:0006974];protein modification by small protein conjugation [GO:0032446];protein ubiquitination [GO:0016567];ubiquitin-dependent protein catabolic process [GO:0006511]	cytoplasm [GO:0005737];cytosol [GO:0005829];nucleus [GO:0005634]	ATP binding [GO:0005524];ubiquitin activating enzyme activity [GO:0004839];ubiquitin-protein transferase activity [GO:0004842]	+	61	51	51	50.9	42.8	42.8	119.62	0	323.31	24784000000	303	2839300000	3030800000	2479300000	2311200000	2522700000	2940600000	2615000000	2709000000	287770000	227210000	324940000	250000000	153600000	137590000	225190000	212010000	129170000	115280000	141910000	211990000	234530000	236850000
+	3.73648	2.38796	5.23418	Q9SD33	Q9SD33	5251	At3g51130	UPF0183 protein At3g51130	Color2 [DarkGray]	1	4					+	11	11	11	28	28	28	45.681	0	30.387	4344800000	110	237890000	267300000	235660000	248490000	252240000	308700000	231930000	340280000	169310000	206300000	237600000	221390000	53237000	123890000	125380000	117160000	78222000	73151000	114390000	129840000	127200000	154400000
+	7.10439	2.38789	5.23392	Q9LRR9	Q9LRR9	4657	GLO1	(S)-2-hydroxy-acid oxidase GLO1	Color2 [DarkGray]	1	4		defense response to bacterium [GO:0042742];hydrogen peroxide biosynthetic process [GO:0050665];lactate oxidation [GO:0019516];oxidative photosynthetic carbon pathway [GO:0009854]	apoplast [GO:0048046];chloroplast [GO:0009507];chloroplast stroma [GO:0009570];cytosol [GO:0005829];cytosolic ribosome [GO:0022626];nucleus [GO:0005634];peroxisome [GO:0005777];plasmodesma [GO:0009506]	FMN binding [GO:0010181];glycolate oxidase activity [GO:0008891];L-lactate dehydrogenase activity [GO:0004459];long-chain-(S)-2-hydroxy-long-chain-acid oxidase activity [GO:0052853];medium-chain-(S)-2-hydroxy-acid oxidase activity [GO:0052854];very-long-chain-(S)-2-hydroxy-acid oxidase activity [GO:0052852]	+	63	63	26	96.5	96.5	52.3	40.341	0	323.31	970300000000	2341	439870000	396390000	292170000	413120000	359620000	409910000	281000000	349200000	71090000000	63966000000	81088000000	73854000000	51575000000	56774000000	58802000000	55893000000	42535000000	31002000000	44364000000	43809000000	79441000000	71147000000
+	5.43814	2.38699	5.23065	Q9M1D0	Q9M1D0	4973	BGLU16	Beta-glucosidase 16	Color2 [DarkGray]	1	4		carbohydrate metabolic process [GO:0005975];glucosinolate catabolic process [GO:0019762];response to salt stress [GO:0009651]		beta-glucosidase activity [GO:0008422];scopolin beta-glucosidase activity [GO:0102483]	+	22	22	22	43.4	43.4	43.4	58.042	0	129.1	10473000000	250	429750000	392560000	447320000	306580000	554980000	598330000	442100000	444740000	741370000	756850000	933670000	837830000	221260000	284730000	206070000	262740000	239650000	187370000	214220000	336550000	454700000	301860000
+	4.49303	2.38243	5.21415	Q8RXK8	Q8RXK8	3040	OVA2	Isoleucine--tRNA ligase, chloroplastic/mitochondrial	Color2 [DarkGray]	1	4		isoleucyl-tRNA aminoacylation [GO:0006428];mitochondrial translation [GO:0032543];plant ovule development [GO:0048481]	chloroplast [GO:0009507];chloroplast stroma [GO:0009570];mitochondrion [GO:0005739]	aminoacyl-tRNA editing activity [GO:0002161];ATP binding [GO:0005524];isoleucine-tRNA ligase activity [GO:0004822];metal ion binding [GO:0046872];tRNA binding [GO:0000049]	+	49	49	49	48.3	48.3	48.3	123.01	0	219.65	17898000000	387	391100000	454800000	361940000	307490000	693160000	750360000	505380000	522770000	1358000000	1294900000	1524000000	1527900000	756530000	926410000	982820000	949290000	519020000	386320000	508350000	505930000	501120000	624930000
+	5.46631	2.38159	5.21111	Q8W456	Q8W456	3222	T20H2.2	Thioredoxin superfamily protein	Color2 [DarkGray]	1	4			cytosol [GO:0005829];vacuole [GO:0005773]		+	19	19	19	70.4	70.4	70.4	26.052	0	163.28	33462000000	331	730190000	1050200000	953970000	757210000	905970000	737410000	754900000	955500000	2168200000	2387400000	2175800000	2251200000	2391300000	1071100000	1313400000	1109300000	1091800000	924230000	1190800000	1217800000	1696200000	1769600000
+	6.22424	2.38015	5.2059	Q9ASS6	Q9ASS6	3626	PNSL5	Photosynthetic NDH subunit of lumenal location 5, chloroplastic	Color2 [DarkGray]	1	4		NAD(P)H dehydrogenase complex assembly [GO:0010275];protein folding [GO:0006457];protein peptidyl-prolyl isomerization [GO:0000413]	chloroplast [GO:0009507];chloroplast stromal thylakoid [GO:0009533];chloroplast thylakoid [GO:0009534];chloroplast thylakoid membrane [GO:0009535];cytoplasm [GO:0005737];plastid [GO:0009536];thylakoid [GO:0009579];thylakoid lumen [GO:0031977]	cyclosporin A binding [GO:0016018];peptidyl-prolyl cis-trans isomerase activity [GO:0003755];protein histidine kinase binding [GO:0043424]	+	22	22	22	66.4	66.4	66.4	28.306	0	323.31	87377000000	524	2023700000	2109700000	1293000000	1619700000	2366600000	2449000000	2094000000	2313500000	5603400000	5611300000	5486000000	5847700000	2840100000	3361900000	3768300000	3373400000	3949700000	2593000000	3844900000	3998500000	5424000000	5022600000
+	4.80743	2.37934	5.20297	Q8VZH2	Q8VZH2	3185	APM1	Aminopeptidase M1	Color2 [DarkGray]	1	4		auxin polar transport [GO:0009926];peptide catabolic process [GO:0043171];proteolysis [GO:0006508]	cytoplasm [GO:0005737];cytosol [GO:0005829];endoplasmic reticulum [GO:0005783];organelle membrane [GO:0031090];plasma membrane [GO:0005886]	aminopeptidase activity [GO:0004177];metalloaminopeptidase activity [GO:0070006];N-1-naphthylphthalamic acid binding [GO:0010013];peptide binding [GO:0042277];zinc ion binding [GO:0008270]	+	87	87	87	75.8	75.8	75.8	98.178	0	323.31	160230000000	1432	6025100000	6437600000	5284400000	5561200000	7124400000	8425100000	6458500000	6805500000	8621400000	7353600000	9707400000	7657800000	4916800000	4890500000	5009000000	6109000000	5912400000	4310600000	5988500000	6283500000	8023600000	7591100000
+	3.01026	2.37699	5.19452	Q9FYG2	Q9FYG2	4328	CAMTA4	Calmodulin-binding transcription activator 4	Color2 [DarkGray]	1	4		positive regulation of transcription by RNA polymerase II [GO:0045944];regulation of transcription, DNA-templated [GO:0006355]	cytosol [GO:0005829];nucleus [GO:0005634]	calmodulin binding [GO:0005516];sequence-specific DNA binding [GO:0043565]	+	4	4	4	3.8	3.8	3.8	113.06	0	3.5008	315690000	12	11712000	0	11055000	17538000	25041000	63826000	49446000	35334000	9066100	13533000	13685000	12545000	5578600	7918200	6515100	6842900	0	0	0	0	0	8260600
+	2.72853	2.37266	5.17896	Q9FNF6	Q9FNF6	4213	MOP9.8	Dipeptidyl peptidase IV-like protein	Color2 [DarkGray]	1	4			cytosol [GO:0005829]	serine-type peptidase activity [GO:0008236]	+	22	22	22	29.6	29.6	29.6	83.85	0	36.814	6978900000	169	590560000	407470000	453840000	359120000	521540000	573510000	477760000	527050000	248870000	261930000	267270000	223210000	154100000	123190000	123680000	126680000	109360000	122830000	127530000	201130000	286000000	223750000
+	5.42659	2.37175	5.17569	Q9LIR4	Q9LIR4	4495	DHAD	Dihydroxy-acid dehydratase, chloroplastic	Color2 [DarkGray]	1	4		branched-chain amino acid biosynthetic process [GO:0009082];embryo sac development [GO:0009553];isoleucine biosynthetic process [GO:0009097];pollen development [GO:0009555];response to salt stress [GO:0009651];root development [GO:0048364];valine biosynthetic process [GO:0009099]	chloroplast [GO:0009507];chloroplast stroma [GO:0009570];plastid [GO:0009536]	4 iron, 4 sulfur cluster binding [GO:0051539];copper ion binding [GO:0005507];dihydroxy-acid dehydratase activity [GO:0004160];hydro-lyase activity [GO:0016836]	+	57	57	57	71.2	71.2	71.2	64.913	0	323.31	229660000000	1250	6495400000	6899800000	4725100000	4708500000	6205300000	7205500000	6160100000	6171800000	13218000000	12952000000	14943000000	14322000000	6990600000	8041600000	9802700000	10050000000	10717000000	7069000000	10731000000	11098000000	12976000000	12481000000
+	2.925	2.36172	5.13983	F4JHC9	F4JHC9	855	At4g00520	Acyl-CoA thioesterase family protein	Color2 [DarkGray]	1	4		acyl-CoA metabolic process [GO:0006637];fatty acid catabolic process [GO:0009062]		acyl-CoA hydrolase activity [GO:0047617]	+	6	6	6	15.5	15.5	15.5	49.85	0	11.131	1230100000	53	12728000	32505000	22364000	19263000	32884000	20208000	11333000	22600000	95969000	37951000	92365000	115290000	41823000	77123000	39271000	49263000	65090000	22380000	50586000	41458000	103760000	95990000
+	6.8957	2.36166	5.1396	Q94AM1	Q94AM1	3482	OOP	Organellar oligopeptidase A, chloroplastic/mitochondrial	Color2 [DarkGray]	1	4		peptide metabolic process [GO:0006518];proteolysis [GO:0006508]	chloroplast [GO:0009507];chloroplast stroma [GO:0009570];cytosol [GO:0005829];mitochondrial matrix [GO:0005759];plastid [GO:0009536]	metal ion binding [GO:0046872];metalloendopeptidase activity [GO:0004222]	+	78	78	41	73.7	73.7	47.8	88.756	0	323.31	130180000000	1258	4121800000	10855000000	3836600000	3308200000	4617800000	4691800000	4669100000	4774400000	6968400000	6669300000	7638300000	7162400000	4634600000	5411900000	5663600000	5614700000	3580700000	2528300000	3436300000	3704500000	6518700000	6247400000
+	4.52377	2.36151	5.1391	Q8S4Y1	Q8S4Y1	3065	AAT1	Acetyl-CoA acetyltransferase, cytosolic 1	Color2 [DarkGray]	1	4		fatty acid beta-oxidation [GO:0006635];isoprenoid biosynthetic process [GO:0008299];pollen germination [GO:0009846];pollen tube growth [GO:0009860];sterol metabolic process [GO:0016125]	cytosol [GO:0005829];peroxisome [GO:0005777];plasma membrane [GO:0005886];plastid [GO:0009536]	acetyl-CoA C-acetyltransferase activity [GO:0003985];acetyl-CoA C-acyltransferase activity [GO:0003988];metal ion binding [GO:0046872]	+	36	36	34	96.5	96.5	96.3	41.411	0	323.31	133390000000	771	11457000000	12087000000	9842400000	9732100000	13200000000	13968000000	13226000000	13852000000	3418000000	2837800000	3475200000	2692000000	1511000000	1660700000	1660000000	1895500000	2054000000	1789700000	1915000000	1943300000	2527900000	2127800000
+	5.37132	2.35298	5.1088	O04309	O04309	1091	JAL35	Jacalin-related lectin 35	Color2 [DarkGray]	1	4		response to cold [GO:0009409];response to jasmonic acid [GO:0009753];response to wounding [GO:0009611];vegetative to reproductive phase transition of meristem [GO:0010228]	chloroplast [GO:0009507];cytosol [GO:0005829];nucleus [GO:0005634];plasmodesma [GO:0009506];vacuole [GO:0005773]	carbohydrate binding [GO:0030246]	+	44	44	43	98.7	98.7	98.7	48.496	0	323.31	75959000000	657	2728900000	2858200000	2444800000	2466200000	7868900000	6690900000	7468600000	7475100000	2956100000	2820800000	3094800000	2750700000	1276900000	1494200000	1716800000	1987500000	1948700000	1395100000	1920000000	2120300000	2731400000	2540600000
+	2.3005	2.35161	5.10392	P42762	P42762	1782	CLPD	Chaperone protein ClpD, chloroplastic	Color2 [DarkGray]	1	4		protein-containing complex assembly [GO:0065003]	chloroplast [GO:0009507];chloroplast envelope [GO:0009941];chloroplast stroma [GO:0009570];plastid [GO:0009536]	ATP binding [GO:0005524];ATPase activity [GO:0016887]	+	19	17	17	24.6	22.9	22.9	103.23	0	46.039	2609700000	70	59510000	74277000	48012000	52473000	32686000	78836000	68490000	57090000	361600000	280560000	372700000	372140000	57432000	122430000	78804000	93451000	0	24239000	27195000	21871000	57647000	64579000
+	3.76298	2.3488	5.09399	O80574	O80574	1457	DAPB1	4-hydroxy-tetrahydrodipicolinate reductase 1, chloroplastic	Color2 [DarkGray]	1	4		diaminopimelate biosynthetic process [GO:0019877];lysine biosynthetic process via diaminopimelate [GO:0009089]	chloroplast [GO:0009507];chloroplast stroma [GO:0009570];cytosol [GO:0005829]	4-hydroxy-tetrahydrodipicolinate reductase [GO:0008839];NADPH binding [GO:0070402]	+	19	19	13	64	64	49	37.55	0	258.41	25912000000	222	389810000	359680000	326530000	312840000	553540000	538010000	452780000	397830000	1908900000	1693600000	2093300000	1851400000	885940000	1170000000	994270000	1149400000	1182800000	846590000	1390900000	1395300000	1617700000	1513300000
+	3.68159	2.34859	5.09327	Q9ZPI6	Q9ZPI6	5882	AIM1	Peroxisomal fatty acid beta-oxidation multifunctional protein AIM1	Color2 [DarkGray]	1	4		fatty acid beta-oxidation [GO:0006635];flower development [GO:0009908];jasmonic acid biosynthetic process [GO:0009695]	cell wall [GO:0005618];peroxisome [GO:0005777];plasma membrane [GO:0005886];plasmodesma [GO:0009506]	3-hydroxyacyl-CoA dehydrogenase activity [GO:0003857];3-hydroxybutyryl-CoA epimerase activity [GO:0008692];dodecenoyl-CoA delta-isomerase activity [GO:0004165];enoyl-CoA hydratase activity [GO:0004300]	+	73	73	73	70.9	70.9	70.9	77.857	0	323.31	135460000000	1222	1002500000	1115800000	1040800000	928310000	1337000000	1426400000	1299000000	1457000000	10485000000	9527100000	10619000000	10020000000	5128400000	6173800000	6792300000	6507800000	7580700000	4588800000	7727600000	6947200000	8983000000	7797300000
+	4.99172	2.3416	5.06866	O64903	O64903	1390	NDPK2	Nucleoside diphosphate kinase II, chloroplastic	Color2 [DarkGray]	1	4		auxin-activated signaling pathway [GO:0009734];CTP biosynthetic process [GO:0006241];GTP biosynthetic process [GO:0006183];purine nucleotide metabolic process [GO:0006163];pyrimidine nucleotide metabolic process [GO:0006220];red, far-red light phototransduction [GO:0009585];response to hydrogen peroxide [GO:0042542];response to UV [GO:0009411];UTP biosynthetic process [GO:0006228]	chloroplast [GO:0009507];chloroplast envelope [GO:0009941];chloroplast stroma [GO:0009570];cytoplasm [GO:0005737];nucleus [GO:0005634];plastid [GO:0009536];thylakoid [GO:0009579]	ATP binding [GO:0005524];metal ion binding [GO:0046872];nucleoside diphosphate kinase activity [GO:0004550]	+	23	23	23	45	45	45	25.55	0	226.03	73320000000	331	151200000	191020000	102120000	54969000	157910000	175200000	146210000	127850000	6552900000	5614500000	6735700000	5986100000	3227900000	3716000000	4027200000	3965800000	4491200000	3071100000	3903600000	4173600000	4289300000	3961500000
+	5.0803	2.33875	5.05863	Q9LE80	Q9LE80	4379	MJK13.11	AT3g15450/MJK13_11	Color2 [DarkGray]	1	4					+	17	17	17	70	70	70	27.7	0	119.34	9391800000	117	55709000	36355000	64989000	35762000	467760000	471020000	385450000	425800000	1652300000	1835600000	2267700000	1574100000	0	0	23235000	0	0	3841700	0	0	50615000	6378000
+	5.09693	2.33582	5.04839	Q9SGY2	Q9SGY2	5323	ACLA-1	ATP-citrate synthase alpha chain protein 1	Color2 [DarkGray]	1	4		lipid metabolic process [GO:0006629]	cytosol [GO:0005829]	ATP binding [GO:0005524];ATP citrate synthase activity [GO:0003878]	+	41	41	12	67.6	67.6	34.8	46.678	0	323.31	79131000000	587	7739600000	8100700000	6431800000	6336100000	7616400000	8562000000	8516600000	9109600000	1544200000	1354800000	1399000000	1126900000	789710000	966870000	909700000	907380000	929260000	687690000	959140000	912940000	1196900000	1049000000
+	3.69457	2.33461	5.04415	Q9SUC0	Q9SUC0	5639	At4g20930	Probable 3-hydroxyisobutyrate dehydrogenase, mitochondrial	Color2 [DarkGray]	1	4		leucine metabolic process [GO:0006551];valine catabolic process [GO:0006574];valine metabolic process [GO:0006573]	mitochondrion [GO:0005739]	3-hydroxyisobutyrate dehydrogenase activity [GO:0008442];NAD binding [GO:0051287];NADP binding [GO:0050661];oxidoreductase activity, acting on the CH-OH group of donors, NAD or NADP as acceptor [GO:0016616];protein self-association [GO:0043621]	+	10	10	10	25.4	25.4	25.4	37.364	0	12.591	2022200000	49	5578400	0	0	0	0	22465000	0	0	133860000	164780000	211740000	190420000	83691000	95101000	70080000	114340000	96933000	56052000	118770000	102150000	113440000	140480000
+	3.4396	2.33405	5.04217	Q9LFL3	Q9LFL3	4423	TOL1	TOM1-like protein 1	Color2 [DarkGray]	1	4		intracellular protein transport [GO:0006886]	cytosol [GO:0005829];plasma membrane [GO:0005886];plastid [GO:0009536]		+	29	29	29	80.6	80.6	80.6	45.31	0	323.31	30567000000	363	1785000000	2310700000	1704300000	1544200000	1823100000	1868800000	2068500000	2096600000	1133000000	1311800000	1268900000	1231200000	735130000	915830000	615750000	975320000	878830000	511270000	889700000	870970000	1091100000	661070000
+	7.62041	2.33148	5.03322	Q9S7E4	Q9S7E4	5149	FDH1	Formate dehydrogenase, chloroplastic/mitochondrial	Color2 [DarkGray]	1	4		formate catabolic process [GO:0042183];response to cadmium ion [GO:0046686]	chloroplast [GO:0009507];cytosol [GO:0005829];formate dehydrogenase complex [GO:0009326];mitochondrion [GO:0005739];plastid [GO:0009536];thylakoid [GO:0009579]	formate dehydrogenase (NAD+) activity [GO:0008863];NAD binding [GO:0051287];oxidoreductase activity, acting on the CH-OH group of donors, NAD or NADP as acceptor [GO:0016616]	+	36	36	36	87	87	87	42.409	0	323.31	34997000000	445	620550000	663100000	426200000	465800000	885990000	906670000	794280000	945650000	2958800000	3219700000	3321300000	3004100000	1002300000	1215200000	844250000	1166600000	911030000	774500000	808800000	1103900000	2409300000	1984200000
+	3.88474	2.32738	5.01893	Q9T034	Q9T034	5794	At4g39280	Phenylalanine--tRNA ligase alpha subunit, cytoplasmic	Color2 [DarkGray]	1	4		phenylalanyl-tRNA aminoacylation [GO:0006432]	cytoplasm [GO:0005737];cytosol [GO:0005829];phenylalanine-tRNA ligase complex [GO:0009328];plasma membrane [GO:0005886]	ATP binding [GO:0005524];phenylalanine-tRNA ligase activity [GO:0004826];tRNA binding [GO:0000049]	+	38	38	38	52.6	52.6	52.6	55.791	0	151.87	9377000000	187	835160000	854150000	507550000	689130000	807430000	1012600000	1195200000	1190200000	260330000	177940000	266140000	218770000	89212000	129290000	114920000	110160000	129640000	68634000	79822000	81449000	191800000	83319000
+	3.28249	2.32614	5.0146	Q9S752;Q9LFH6	Q9S752;Q9LFH6	5135	LOG2;LUL2	Probable E3 ubiquitin-protein ligase LOG2;Probable E3 ubiquitin-protein ligase LUL2	Color2 [DarkGray]	1	4		abscisic acid-activated signaling pathway involved in stomatal movement [GO:1901527];amino acid homeostasis [GO:0080144];protein ubiquitination [GO:0016567];response to abscisic acid [GO:0009737]	plasma membrane [GO:0005886]	metal ion binding [GO:0046872];ubiquitin protein ligase activity [GO:0061630];ubiquitin-protein transferase activity [GO:0004842]	+	2	2	2	6.4	6.4	6.4	42.848	0.0064355	1.6669	80409000	5	5046000	26171000	4773500	5021400	4161700	5299000	3011200	2454300	1685900	2799300	2925800	3061800	692600	883740	1139200	891970	812050	438720	808650	976370	1304300	2011400
+	2.82104	2.32571	5.01311	Q8VYI4	Q8VYI4	3128	At1g14810	Aspartate-semialdehyde dehydrogenase, putative	Color2 [DarkGray]	1	4		isoleucine biosynthetic process [GO:0009097];lysine biosynthetic process via diaminopimelate [GO:0009089];methionine biosynthetic process [GO:0009086];threonine biosynthetic process [GO:0009088]	chloroplast [GO:0009507];chloroplast stroma [GO:0009570];mitochondrion [GO:0005739];plastid [GO:0009536]	aspartate-semialdehyde dehydrogenase activity [GO:0004073];NAD binding [GO:0051287];NADP binding [GO:0050661];protein dimerization activity [GO:0046983]	+	33	33	33	76.8	76.8	76.8	40.745	0	323.31	120220000000	716	5401000000	5487000000	4504800000	4124900000	6336900000	6388500000	6344500000	6296300000	6238800000	4141800000	6174000000	4603000000	3284300000	3531600000	4145100000	3905400000	4487700000	3026900000	5140500000	4945000000	6300100000	5642700000
+	3.05595	2.32339	5.00506	Q8LG89	Q8LG89	2937	ARPN	Basic blue protein	Color2 [DarkGray]	1	4		anther development [GO:0048653];pollination [GO:0009856]	anchored component of plasma membrane [GO:0046658];apoplast [GO:0048046];extracellular matrix [GO:0031012];secretory vesicle [GO:0099503]	electron transfer activity [GO:0009055];metal ion binding [GO:0046872]	+	6	6	6	32.6	32.6	32.6	14.038	0	90.675	4084300000	71	40958000	47957000	30165000	24119000	19123000	21337000	14630000	20257000	370910000	265830000	300310000	305540000	189000000	213320000	205290000	204690000	227530000	96062000	156970000	179700000	383040000	231180000
+	6.61207	2.32123	4.99759	Q9LXC9	Q9LXC9	4832	PPA6	Soluble inorganic pyrophosphatase 6, chloroplastic	Color2 [DarkGray]	1	4		defense response to bacterium [GO:0042742];phosphate-containing compound metabolic process [GO:0006796];response to cadmium ion [GO:0046686]	chloroplast [GO:0009507];chloroplast envelope [GO:0009941];chloroplast stroma [GO:0009570];plasma membrane [GO:0005886];plastid [GO:0009536];thylakoid [GO:0009579]	inorganic diphosphatase activity [GO:0004427];magnesium ion binding [GO:0000287]	+	34	34	34	61	61	61	33.38	0	323.31	74807000000	514	779820000	699940000	324650000	729460000	602460000	587230000	775650000	698560000	6922400000	7001300000	8070400000	7312300000	2375500000	2235500000	2515300000	2720400000	2960900000	2370400000	2965200000	3144200000	4846200000	4397000000
+	5.34281	2.31816	4.98697	Q8H0Z4	Q8H0Z4	2710	GAT1_2.1	Putative glutamine amidotransferase GAT1_2.1	Color2 [DarkGray]	1	4		glutamine metabolic process [GO:0006541];regulation of secondary shoot formation [GO:2000032]		hydrolase activity [GO:0016787];transferase activity [GO:0016740]	+	14	14	14	35.7	35.7	35.7	45.362	0	20.41	2171500000	34	10522000	138180000	52505000	87867000	14585000	22465000	77276000	98536000	458140000	412050000	394720000	380750000	0	20388000	0	0	0	0	0	0	0	1572100
+	4.02068	2.31761	4.98507	P93732	P93732	1992	PIP	Proline iminopeptidase	Color2 [DarkGray]	1	4			chloroplast [GO:0009507];cytosol [GO:0005829];mitochondrion [GO:0005739];secretory vesicle [GO:0099503]	aminopeptidase activity [GO:0004177]	+	30	30	3	67.4	67.4	5.5	43.058	0	256.99	33768000000	334	391190000	170670000	286840000	387080000	490920000	485710000	559500000	375090000	2568200000	2233600000	3229800000	2351300000	1210500000	1440000000	1295300000	1621200000	1708100000	1193100000	1729300000	1449300000	2104400000	2343600000
+	2.72951	2.31739	4.9843	O48724	O48724	1286	WEB1	Protein WEAK CHLOROPLAST MOVEMENT UNDER BLUE LIGHT 1	Color2 [DarkGray]	1	4		chloroplast accumulation movement [GO:0009904];chloroplast avoidance movement [GO:0009903]	cytosol [GO:0005829];peroxisome [GO:0005777];plasma membrane [GO:0005886]		+	25	25	25	29.6	29.6	29.6	89.293	0	62.364	11335000000	151	828770000	1000000000	830840000	962080000	735770000	877150000	790230000	1080500000	406630000	497330000	374520000	390330000	202110000	157800000	210780000	217350000	220590000	113400000	222140000	207990000	242310000	243680000
+	2.89491	2.31588	4.97907	Q94JZ8	Q94JZ8	3564	PUX7	Plant UBX domain-containing protein 7	Color2 [DarkGray]	1	4			nucleus [GO:0005634]	protein-macromolecule adaptor activity [GO:0030674]	+	19	19	19	45.3	45.3	45.3	51.807	0	166.05	11018000000	231	806070000	914800000	757080000	654410000	958700000	998080000	919770000	1061400000	355940000	441630000	301260000	310520000	198250000	163870000	241530000	186290000	169230000	196850000	168590000	181920000	246850000	295710000
+	7.15172	2.31475	4.97519	B5X574	B5X574	431	PCK2	At5g65690	Color2 [DarkGray]	1	4		gluconeogenesis [GO:0006094]		ATP binding [GO:0005524];kinase activity [GO:0016301];phosphoenolpyruvate carboxykinase (ATP) activity [GO:0004612]	+	24	16	16	45.1	33	33	72.891	0	69.167	2215000000	46	101060000	36482000	31749000	74650000	152030000	129180000	157220000	192790000	257030000	318690000	439010000	325080000	0	0	0	0	0	0	0	0	0	0
+	2.94881	2.3133	4.97018	Q96292	Q96292	3601	ACT2	Actin-2	Color2 [DarkGray]	1	4		cell division [GO:0051301];response to cytokinin [GO:0009735];response to far red light [GO:0010218];response to high light intensity [GO:0009644];response to red light [GO:0010114];root epidermal cell differentiation [GO:0010053];root hair cell tip growth [GO:0048768];root hair elongation [GO:0048767]	cytoplasm [GO:0005737];cytoskeleton [GO:0005856];cytosol [GO:0005829];nucleus [GO:0005634];plasma membrane [GO:0005886];plasmodesma [GO:0009506]	ATP binding [GO:0005524];structural constituent of cytoskeleton [GO:0005200]	+	55	37	2	85.4	78.8	7.7	41.876	0	323.31	524350000000	1682	54546000000	55975000000	45306000000	49327000000	51383000000	53665000000	51500000000	48762000000	8111100000	7529200000	10361000000	9588900000	4713200000	4852400000	6934600000	7098100000	4859600000	3497200000	6202900000	6698200000	8666500000	7676800000
+	6.58254	2.31329	4.97014	Q9FKA4	Q9FKA4	4079	PER62	Peroxidase 62	Color2 [DarkGray]	1	4		defense response to fungus [GO:0050832];hydrogen peroxide catabolic process [GO:0042744];response to oxidative stress [GO:0006979]	extracellular region [GO:0005576];Golgi apparatus [GO:0005794];plant-type cell wall [GO:0009505];plasmodesma [GO:0009506]	heme binding [GO:0020037];metal ion binding [GO:0046872];peroxidase activity [GO:0004601]	+	13	13	13	60.2	60.2	60.2	34.133	0	211.63	2175200000	40	3384700	4379600	0	9756100	41795000	39403000	16160000	41528000	517670000	432330000	483720000	540330000	0	0	0	0	8255000	0	6532500	8039000	0	15864000
+	2.71797	2.31135	4.96348	Q9C8L2	Q9C8L2	3769	FAP3	Fatty-acid-binding protein 3, chloroplastic	Color2 [DarkGray]	1	4		fatty acid metabolic process [GO:0006631]	chloroplast [GO:0009507];chloroplast stroma [GO:0009570]	fatty acid binding [GO:0005504];intramolecular lyase activity [GO:0016872]	+	12	12	12	39.4	39.4	39.4	30.729	0	197.53	9236500000	142	50996000	51058000	51088000	50416000	87811000	97861000	78045000	94138000	756670000	665130000	783590000	633690000	433710000	520480000	467980000	470930000	414140000	382680000	444870000	473110000	665730000	550350000
+	2.70578	2.31092	4.96199	Q9LR75	Q9LR75	4649	CPX1	Coproporphyrinogen-III oxidase 1, chloroplastic	Color2 [DarkGray]	1	4		chlorophyll biosynthetic process [GO:0015995];protoporphyrinogen IX biosynthetic process [GO:0006782]	apoplast [GO:0048046];chloroplast [GO:0009507];chloroplast stroma [GO:0009570];cytoplasm [GO:0005737];extracellular region [GO:0005576]	coproporphyrinogen oxidase activity [GO:0004109];protein homodimerization activity [GO:0042803]	+	48	48	48	70.5	70.5	70.5	43.796	0	323.31	265890000000	980	1227300000	1222000000	860380000	1005600000	1506400000	1699400000	1350100000	1315400000	17796000000	16555000000	20759000000	19389000000	10055000000	13483000000	14138000000	13523000000	16112000000	8731000000	15723000000	16983000000	18441000000	17302000000
+	2.42799	2.31009	4.95916	Q9SL48	Q9SL48	5461	SLY1	SEC1 family transport protein SLY1	Color2 [DarkGray]	1	4		endoplasmic reticulum to Golgi vesicle-mediated transport [GO:0006888];intracellular protein transport [GO:0006886];vesicle docking involved in exocytosis [GO:0006904];vesicle-mediated transport [GO:0016192]	cytosol [GO:0005829];Golgi membrane [GO:0000139];mitochondrion [GO:0005739]	syntaxin binding [GO:0019905]	+	25	25	25	42.6	42.6	42.6	69.15	0	97.935	8310500000	211	590640000	727040000	527790000	572070000	525270000	613080000	646540000	627110000	285720000	372380000	351430000	203630000	159820000	291670000	172310000	174150000	157630000	82259000	186970000	145450000	255980000	218590000
+	4.68897	2.30629	4.94608	Q9CAP1	Q9CAP1	3849	At1g77670	At1g77670	Color2 [DarkGray]	1	4		biosynthetic process [GO:0009058]	chloroplast [GO:0009507];cytoplasm [GO:0005737]	kynurenine-oxoglutarate transaminase activity [GO:0016212];pyridoxal phosphate binding [GO:0030170]	+	10	10	10	30.9	30.9	30.9	48.709	0	33.899	4351000000	79	185610000	229520000	168920000	148000000	261580000	203110000	214210000	250240000	151300000	316900000	441800000	408100000	63048000	97251000	107990000	132650000	43406000	53185000	93538000	88162000	146890000	170990000
+	3.42849	2.30435	4.93946	F4KAB4	F4KAB4	1032	At5g44600	S-adenosyl-L-methionine-dependent methyltransferases superfamily protein	Color2 [DarkGray]	1	4		methylation [GO:0032259]		methyltransferase activity [GO:0008168]	+	4	4	4	13.5	13.5	13.5	37.202	0	5.5611	761750000	22	4666100	0	0	0	0	57797000	0	0	49436000	29770000	109180000	37775000	56303000	25682000	61232000	38719000	46224000	27631000	27803000	22001000	11973000	26044000
+	4.37964	2.30369	4.93718	Q9LRL5	Q9LRL5	4652	At3g21950	S-adenosyl-L-methionine-dependent methyltransferases superfamily protein	Color2 [DarkGray]	1	4		methylation [GO:0032259];response to cadmium ion [GO:0046686]		methyltransferase activity [GO:0008168]	+	3	3	3	9.8	9.8	9.8	42.01	0.0023976	2.1341	142390000	16	0	0	0	0	0	0	0	0	11413000	7266900	10949000	10508000	5790000	14374000	13689000	9542700	5531500	972470	4901800	6482700	11039000	10670000
+	2.22358	2.29757	4.91628	Q9SJ62	Q9SJ62	5391	WDL4	Protein WVD2-like 4	Color2 [DarkGray]	1	4			endoplasmic reticulum [GO:0005783];microtubule [GO:0005874]		+	14	14	14	31.5	31.5	31.5	46.696	0	17.859	1487600000	70	29686000	36982000	30785000	25957000	43710000	59715000	51897000	55471000	105370000	89563000	142690000	121170000	57106000	50390000	74748000	54312000	68333000	22336000	56519000	54681000	55263000	62922000
+	2.85136	2.29691	4.91405	Q9C6Y5	Q9C6Y5	3718	At1g44130	Eukaryotic aspartyl protease family protein	Color2 [DarkGray]	1	4		protein catabolic process [GO:0030163];proteolysis [GO:0006508]	Golgi apparatus [GO:0005794];plant-type cell wall [GO:0009505]	aspartic-type endopeptidase activity [GO:0004190]	+	2	2	2	4	4	4	43.959	0	4.2042	105580000	4	0	0	0	0	0	0	0	0	24007000	28344000	23246000	7912400	0	4969100	0	3391600	3778000	0	0	0	4040800	2996300
+	3.88984	2.29187	4.89692	Q9CAI5	Q9CAI5	3844	CKL2	Casein kinase 1-like protein 2	Color2 [DarkGray]	1	4		peptidyl-serine phosphorylation [GO:0018105]	cytoplasm [GO:0005737];nucleus [GO:0005634];plasma membrane [GO:0005886]	ATP binding [GO:0005524];protein serine/threonine kinase activity [GO:0004674]	+	8	3	3	19.4	7.5	7.5	51.878	0.002034	2.1741	438390000	18	12063000	54945000	19360000	11516000	124540000	31890000	17800000	20948000	4053200	14280000	4667400	14274000	2398000	3077200	13522000	15122000	2519900	1805100	2719300	1808700	16948000	28026000
+	5.14826	2.28727	4.88131	Q9FK81	Q9FK81	4076	At5g22580	Stress-response A/B barrel domain-containing protein At5g22580	Color2 [DarkGray]	1	4			chloroplast [GO:0009507];cytosol [GO:0005829];plastid [GO:0009536]	metal ion binding [GO:0046872]	+	13	13	13	70.3	70.3	70.3	12.349	0	207.94	17638000000	170	38332000	0	0	0	0	0	0	0	1603900000	1328400000	1793300000	1553800000	1015900000	829550000	1027300000	894430000	485310000	334380000	390480000	496200000	1698300000	1513700000
+	6.60666	2.28311	4.86727	Q9LVI9	Q9LVI9	4784	PYD1	Dihydropyrimidine dehydrogenase (NADP(+)), chloroplastic	Color2 [DarkGray]	1	4		beta-alanine biosynthetic process [GO:0019483];cellular response to nitrogen levels [GO:0043562];thymine catabolic process [GO:0006210];uracil catabolic process [GO:0006212]	chloroplast [GO:0009507];chloroplast stroma [GO:0009570];plastid [GO:0009536]	dihydropyrimidine dehydrogenase (NADP+) activity [GO:0017113];iron-sulfur cluster binding [GO:0051536];NADP binding [GO:0050661];uracil binding [GO:0002058]	+	40	40	40	70.4	70.4	70.4	46.846	0	323.31	93637000000	644	4692400000	5050600000	3811200000	4092300000	5129600000	6159500000	7184900000	7466100000	5624700000	5444600000	3894000000	3839700000	2148600000	2448600000	2376000000	2562600000	2452400000	1855600000	2335500000	2383600000	3654700000	3052100000
+	3.3779	2.28102	4.8602	Q9SFH9	Q9SFH9	5297	HEMB1	Delta-aminolevulinic acid dehydratase 1, chloroplastic	Color2 [DarkGray]	1	4		chlorophyll biosynthetic process [GO:0015995];heme biosynthetic process [GO:0006783];porphyrin-containing compound biosynthetic process [GO:0006779];protoporphyrinogen IX biosynthetic process [GO:0006782]	chloroplast [GO:0009507];chloroplast stroma [GO:0009570];cytosol [GO:0005829];mitochondrion [GO:0005739]	porphobilinogen synthase activity [GO:0004655];zinc ion binding [GO:0008270]	+	27	27	27	47	47	47	46.69	0	323.31	45092000000	388	132810000	189270000	122030000	122810000	2149700000	313540000	314860000	3295900000	2547100000	2348700000	2923900000	2706100000	1500300000	2002700000	2295300000	2297800000	2460000000	1472800000	2485200000	2578200000	2853600000	2623300000
+	3.33323	2.28016	4.8573	F4I3R1	F4I3R1	608	At1g63770	Peptidase M1 family protein	Color2 [DarkGray]	1	4		response to cadmium ion [GO:0046686]	apoplast [GO:0048046];chloroplast [GO:0009507];chloroplast envelope [GO:0009941];chloroplast stroma [GO:0009570];cytosol [GO:0005829];nucleus [GO:0005634];plasma membrane [GO:0005886];vacuole [GO:0005773]	metallopeptidase activity [GO:0008237];zinc ion binding [GO:0008270]	+	119	119	119	85.5	85.5	85.5	109.41	0	323.31	465150000000	2778	11321000000	11085000000	8857200000	8788400000	10771000000	11614000000	10528000000	10148000000	26878000000	26068000000	30937000000	27467000000	16586000000	19693000000	20502000000	22265000000	23137000000	16453000000	19325000000	25580000000	27839000000	26213000000
+	4.20975	2.2797	4.85575	Q93V74	Q93V74	3262	CYCLASE1	Cyclase-like protein 1	Color2 [DarkGray]	1	4		defense response [GO:0006952];negative regulation of programmed cell death [GO:0043069];tryptophan catabolic process to kynurenine [GO:0019441]	cell wall [GO:0005618];endoplasmic reticulum [GO:0005783];extracellular region [GO:0005576];Golgi apparatus [GO:0005794];plasma membrane [GO:0005886];secretory vesicle [GO:0099503]	arylformamidase activity [GO:0004061]	+	16	16	15	65.9	65.9	65.9	28.384	0	263.61	42623000000	280	4161600000	3068300000	2523500000	2142600000	2606700000	2405200000	2933700000	3002200000	2047900000	1854200000	1989800000	1774100000	508140000	876230000	962920000	864360000	1131700000	659120000	1171200000	985520000	1371000000	1226600000
+	4.41171	2.277	4.8467	Q9SI74	Q9SI74	5351	PMEI10	Pectinesterase inhibitor 10	Color2 [DarkGray]	1	4		negative regulation of catalytic activity [GO:0043086];plant-type cell wall organization or biogenesis [GO:0071669]	apoplast [GO:0048046]	enzyme inhibitor activity [GO:0004857];pectinesterase inhibitor activity [GO:0046910]	+	2	2	2	7.4	7.4	7.4	32.354	1	-2	170120000	2	0	0	0	0	8988500	0	0	0	54319000	42179000	41191000	23447000	0	0	0	0	0	0	0	0	0	0
+	3.67413	2.27678	4.84596	Q9SU86	Q9SU86	5635	CDA6	Cytidine deaminase 6	Color2 [DarkGray]	1	4		cytidine deamination [GO:0009972]	cytosol [GO:0005829]	cytidine deaminase activity [GO:0004126];zinc ion binding [GO:0008270]	+	4	4	4	16.7	16.7	16.7	32.043	0	5.0296	770500000	30	15684000	24351000	6272300	6851500	19999000	17910000	4497700	17940000	37165000	62842000	44061000	70279000	50089000	22757000	29978000	38862000	24533000	20719000	21176000	45580000	74946000	39086000
+	4.0298	2.27601	4.84336	Q8W4Q4	Q8W4Q4	3250	MRF3	MA3 DOMAIN-CONTAINING TRANSLATION REGULATORY FACTOR 3	Color2 [DarkGray]	1	4		ethylene-activated signaling pathway [GO:0009873];negative regulation of transcription, DNA-templated [GO:0045892];regulation of translation [GO:0006417];response to absence of light [GO:0009646];response to carbon starvation [GO:0090549];response to ethylene [GO:0009723];response to salt stress [GO:0009651]	cytoplasm [GO:0005737];cytosol [GO:0005829];Golgi apparatus [GO:0005794];nucleus [GO:0005634]	ribosome binding [GO:0043022]	+	49	49	46	55.4	55.4	53.6	77.435	0	323.31	23622000000	385	1963800000	1948400000	1461300000	1502700000	2773400000	2770900000	2382500000	2657800000	654960000	573370000	677240000	568700000	283230000	260590000	305750000	341960000	357670000	179570000	295410000	281040000	290130000	345050000
+	3.14009	2.27564	4.84211	Q84WV7	Q84WV7	2600	At3g58600	Adaptin ear-binding coat-associated protein 1 NECAP-1	Color2 [DarkGray]	1	4		endocytosis [GO:0006897]	membrane [GO:0016020]		+	9	9	9	34.8	34.8	34.8	33.917	0	33.88	3361300000	78	133790000	125810000	106940000	71010000	108020000	222890000	156950000	145060000	170710000	165530000	222670000	223620000	109680000	112990000	135930000	121850000	108560000	75936000	106840000	123110000	150910000	110220000
+	6.5658	2.27528	4.8409	Q93Z70	Q93Z70	3342	At2g19940	Probable N-acetyl-gamma-glutamyl-phosphate reductase, chloroplastic	Color2 [DarkGray]	1	4		arginine biosynthetic process [GO:0006526];response to cadmium ion [GO:0046686]	chloroplast [GO:0009507];chloroplast stroma [GO:0009570];nucleolus [GO:0005730]	copper ion binding [GO:0005507];N-acetyl-gamma-glutamyl-phosphate reductase activity [GO:0003942];NAD binding [GO:0051287];protein dimerization activity [GO:0046983]	+	31	31	31	68.8	68.8	68.8	44.135	0	216.85	18788000000	296	1649400000	1847700000	1386800000	1177100000	2106300000	1936300000	1692800000	2084600000	437710000	401750000	558360000	480450000	102100000	142840000	158840000	158170000	84364000	45042000	71283000	81186000	647370000	472660000
+	4.01407	2.27283	4.83271	Q84WS0	Q84WS0	2593	SBTI1.1	Subtilisin-like protease SBT1.1	Color2 [DarkGray]	1	4		proteolysis [GO:0006508]	cell wall [GO:0005618];extracellular matrix [GO:0031012]	serine-type endopeptidase activity [GO:0004252]	+	4	4	4	5.9	5.9	5.9	83.246	0	10.48	1570900000	27	0	0	0	0	0	11023000	0	0	109680000	103100000	127170000	119840000	30219000	74952000	130470000	88553000	60853000	22254000	63320000	54513000	142040000	130280000
+	3.32336	2.26458	4.80515	Q9FIX1	Q9FIX1	4036	AIG2LB	AIG2-like protein B	Color2 [DarkGray]	1	4			cytosol [GO:0005829];plasma membrane [GO:0005886];plastid [GO:0009536]	transferase activity, transferring acyl groups [GO:0016746]	+	4	4	4	16.9	16.9	16.9	20.017	0	8.7296	1579200000	54	76975000	64679000	50701000	50805000	115780000	97338000	68757000	101730000	70608000	60752000	95665000	103490000	26552000	34928000	52764000	41656000	47171000	19421000	46311000	55833000	69620000	59925000
+	2.85847	2.26451	4.8049	Q9C7W7	Q9C7W7	3742	UGE4	UDP-glucose 4-epimerase 4	Color2 [DarkGray]	1	4		cell wall biogenesis [GO:0042546];cell wall organization [GO:0071555];galactose metabolic process [GO:0006012];plant-type cell wall biogenesis [GO:0009832];root epidermal cell differentiation [GO:0010053];rRNA processing [GO:0006364];xyloglucan biosynthetic process [GO:0009969]	cytosol [GO:0005829];Golgi stack [GO:0005795]	RNA binding [GO:0003723];UDP-glucose 4-epimerase activity [GO:0003978]	+	22	22	22	63.5	63.5	63.5	38.123	0	206.81	15382000000	184	1790300000	1715400000	1578100000	1352400000	2008900000	1764400000	1686500000	1879700000	138040000	118800000	151060000	186820000	63181000	64810000	80627000	91234000	25740000	3857100	48496000	25199000	129500000	149340000
+	7.5993	2.26356	4.80176	Q41931	Q41931	2245	ACO2	1-aminocyclopropane-1-carboxylate oxidase 2	Color2 [DarkGray]	1	4		cellular response to fatty acid [GO:0071398];cellular response to nitric oxide [GO:0071732];defense response [GO:0006952];detection of ethylene stimulus [GO:0009727];ethylene biosynthetic process [GO:0009693];positive regulation of seed germination [GO:0010030]	cell wall [GO:0005618];cytosol [GO:0005829];endoplasmic reticulum [GO:0005783];Golgi apparatus [GO:0005794];nucleus [GO:0005634];plasma membrane [GO:0005886];plasmodesma [GO:0009506]	1-aminocyclopropane-1-carboxylate oxidase activity [GO:0009815];copper ion binding [GO:0005507];dioxygenase activity [GO:0051213];L-ascorbic acid binding [GO:0031418]	+	29	28	27	68.1	65.6	64.7	36.183	0	323.31	54370000000	413	3395500000	3248700000	2350700000	2670100000	3228700000	3304000000	3844900000	3487300000	3546500000	3518500000	3263100000	3452900000	1151600000	1309900000	1046900000	1015400000	1167500000	739950000	1400800000	1549000000	1501500000	1579700000
+	2.74395	2.26186	4.79611	Q9LFT3	Q9LFT3	4430	At5g15870	Glycosyl hydrolase family 81 protein	Color2 [DarkGray]	1	4				glucan endo-1,3-beta-glucanase activity, C-3 substituted reducing group [GO:0052861]	+	15	15	15	28.5	28.5	28.5	82.872	0	20.74	2671800000	60	208980000	185230000	146880000	157230000	143320000	164720000	173710000	133040000	125260000	99062000	116900000	97914000	57985000	53329000	60333000	75393000	44321000	34766000	41030000	74080000	110280000	112030000
+	6.17674	2.26134	4.79437	Q42592	Q42592	2302	APXS	L-ascorbate peroxidase S, chloroplastic/mitochondrial	Color2 [DarkGray]	1	4		cellular response to oxidative stress [GO:0034599];hydrogen peroxide catabolic process [GO:0042744];response to reactive oxygen species [GO:0000302]	chloroplast [GO:0009507];chloroplast stroma [GO:0009570];cytosol [GO:0005829];mitochondrion [GO:0005739]	heme binding [GO:0020037];L-ascorbate peroxidase activity [GO:0016688];metal ion binding [GO:0046872];peroxidase activity [GO:0004601]	+	28	27	22	59.4	59.4	57	40.407	0	313.78	29268000000	355	996920000	1167400000	914160000	890510000	751470000	1028900000	821290000	876180000	2295600000	2271900000	2335200000	1986300000	923800000	1040000000	880090000	881910000	1216700000	752990000	1113300000	991280000	1331600000	1169000000
+	2.66558	2.25261	4.76545	Q84MD7	Q84MD7	2559	At1g72880	At1g72880	Color2 [DarkGray]	1	4			cytosol [GO:0005829]	nucleotidase activity [GO:0008252]	+	15	15	15	50.1	50.1	50.1	40.673	0	84.767	4323400000	85	436190000	362630000	262380000	325900000	426490000	465170000	447280000	429410000	102300000	104720000	101650000	83317000	45414000	55778000	53309000	49588000	114640000	43294000	49789000	38800000	97037000	66770000
+	2.1719	2.24945	4.75501	Q8LDI5	Q8LDI5	2895	CXXS1	Thioredoxin-like protein CXXS1	Color2 [DarkGray]	1	4			cytosol [GO:0005829];extracellular region [GO:0005576]	protein disulfide isomerase activity [GO:0003756]	+	8	8	8	44.1	44.1	44.1	13.334	0	9.1632	2241700000	49	54271000	46620000	23810000	38889000	0	25876000	26736000	4506500	169100000	216680000	194050000	165190000	111540000	131480000	136110000	147920000	78925000	44435000	77785000	63977000	118980000	119020000
+	2.78225	2.24873	4.75264	Q42546	Q42546	2288	SAL1	SAL1 phosphatase	Color2 [DarkGray]	1	4		abscisic acid-activated signaling pathway [GO:0009738];inositol phosphate dephosphorylation [GO:0046855];sulfur compound metabolic process [GO:0006790]		3'(2'),5'-bisphosphate nucleotidase activity [GO:0008441];inositol-1,4-bisphosphate 1-phosphatase activity [GO:0004441];metal ion binding [GO:0046872]	+	35	35	35	90.1	90.1	90.1	37.564	0	323.31	57118000000	666	1676100000	1749100000	1045500000	1338400000	2329300000	2527900000	2286900000	2511200000	2882400000	2856000000	3034000000	3016000000	1660800000	2466600000	2358000000	2589300000	2185400000	1529200000	2268700000	2347200000	3285800000	2929300000
+	3.52299	2.2453	4.74135	Q84P21	Q84P21	2563	4CLL5	4-coumarate--CoA ligase-like 5	Color2 [DarkGray]	1	4		jasmonic acid biosynthetic process [GO:0009695];response to wounding [GO:0009611]	peroxisome [GO:0005777]	ATP binding [GO:0005524];CoA-ligase activity [GO:0016405]	+	43	42	42	71.8	70.7	70.7	59.374	0	323.31	26009000000	437	410510000	475840000	284380000	302760000	356810000	435390000	409870000	356470000	1516600000	1706400000	2084900000	1581200000	1145900000	1280300000	1244100000	1446900000	1102500000	869070000	1239300000	1223600000	1951900000	1367100000
+	5.01579	2.24381	4.73646	Q9FJY1	Q9FJY1	4064	At5g66590	CAP (Cysteine-rich secretory proteins, Antigen 5, and Pathogenesis-related 1 protein) superfamily protein	Color2 [DarkGray]	1	4			extracellular space [GO:0005615]		+	3	3	3	22.2	22.2	22.2	20.099	0	3.0711	148020000	8	0	0	3962000	0	0	0	0	0	13586000	11501000	19990000	20230000	1484400	4766500	4902100	5568100	1863300	4235900	11545000	7704100	15403000	9351600
+	2.66471	2.24176	4.72974	O64883	O64883	1388	BGLU26	Beta-glucosidase 26, peroxisomal	Color2 [DarkGray]	1	4		carbohydrate metabolic process [GO:0005975];defense response by callose deposition in cell wall [GO:0052544];defense response to bacterium [GO:0042742];defense response to fungus, incompatible interaction [GO:0009817];glucosinolate catabolic process [GO:0019762];glucosinolate metabolic process [GO:0019760];indole glucosinolate catabolic process [GO:0042344];induced systemic resistance [GO:0009682…	chloroplast envelope [GO:0009941];membrane [GO:0016020];peroxisome [GO:0005777]	beta-glucosidase activity [GO:0008422];scopolin beta-glucosidase activity [GO:0102483];thioglucosidase activity [GO:0019137]	+	23	22	22	40.4	39.1	39.1	63.915	0	116.61	11732000000	176	1077500000	1196700000	917400000	801690000	1180400000	1093300000	980650000	1070400000	410150000	256800000	333660000	292490000	168890000	176460000	129160000	136530000	114000000	129530000	184100000	168340000	216840000	233270000
+	3.82947	2.23872	4.71979	Q84M92	Q84M92	2548	ARP4	Actin-related protein 4	Color2 [DarkGray]	1	4		ATP-dependent chromatin remodeling [GO:0043044];chromatin organization [GO:0006325];histone H4 acetylation [GO:0043967];long-day photoperiodism, flowering [GO:0048574];pollen sperm cell differentiation [GO:0048235];regulation of transcription by RNA polymerase II [GO:0006357]	cytoplasm [GO:0005737];NuA4 histone acetyltransferase complex [GO:0035267];nucleolus [GO:0005730];nucleus [GO:0005634];SWI/SNF complex [GO:0016514]	chromatin binding [GO:0003682];structural constituent of cytoskeleton [GO:0005200]	+	30	29	29	70.3	68.9	68.9	48.936	0	239.04	8471300000	167	782650000	809720000	597180000	668410000	1049300000	936720000	999250000	949730000	117740000	109170000	150270000	115610000	101220000	108110000	78970000	100590000	78611000	49675000	67705000	82130000	171280000	130870000
+	3.58079	2.23804	4.71757	Q9FMD7	Q9FMD7	4160	At5g16590	Probable inactive receptor kinase At5g16590	Color2 [DarkGray]	1	4		response to symbiotic fungus [GO:0009610]	integral component of membrane [GO:0016021];plant-type cell wall [GO:0009505];plasma membrane [GO:0005886];plasmodesma [GO:0009506];plastid [GO:0009536]	ATP binding [GO:0005524];protein kinase activity [GO:0004672]	+	25	18	18	46.4	38.1	38.1	67.463	0	205.46	15498000000	228	1111300000	1057800000	759740000	947750000	976550000	1006900000	899080000	839330000	582620000	549780000	700520000	632020000	456580000	484920000	495650000	555850000	413400000	283390000	380760000	377720000	515850000	478200000
+	2.71259	2.23352	4.7028	Q9LRQ8	Q9LRQ8	4656	PMAT2	Phenolic glucoside malonyltransferase 2	Color2 [DarkGray]	1	4		response to toxic substance [GO:0009636]		O-malonyltransferase activity [GO:0050736]	+	22	22	22	42.6	42.6	42.6	50.217	0	53.167	4568900000	131	54392000	44327000	44572000	18450000	0	14910000	0	0	456220000	430490000	452870000	518820000	175000000	198100000	139640000	200140000	216790000	193960000	208210000	233290000	285570000	243600000
+	2.37999	2.23217	4.69841	Q9SF85	Q9SF85	5290	ADK1	Adenosine kinase 1	Color2 [DarkGray]	1	4		adenosine salvage [GO:0006169];AMP salvage [GO:0044209];response to cadmium ion [GO:0046686];response to trehalose-6-phosphate [GO:0080094];viral process [GO:0016032]	apoplast [GO:0048046];cytosol [GO:0005829];nucleus [GO:0005634];plasma membrane [GO:0005886];plasmodesma [GO:0009506]	adenosine kinase activity [GO:0004001];ATP binding [GO:0005524];copper ion binding [GO:0005507]	+	51	27	27	92.7	76.7	76.7	37.836	0	323.31	241300000000	958	14182000000	12724000000	11518000000	10510000000	14565000000	12873000000	13417000000	14579000000	11112000000	9671200000	10555000000	9475600000	5677400000	7049600000	7622800000	6811100000	9351400000	5936700000	8463100000	8271600000	9745500000	8520900000
+	4.13237	2.22824	4.68561	Q9SX25	Q9SX25	5711	CXE6	Probable carboxylesterase 6	Color2 [DarkGray]	1	4		catabolic process [GO:0009056];cellular response to hypoxia [GO:0071456]		hydrolase activity [GO:0016787];methyl indole-3-acetate esterase activity [GO:0080030]	+	3	3	3	9.8	9.8	9.8	37.149	0	6.8649	218650000	7	0	0	0	7739500	0	0	6150600	0	47586000	46807000	56917000	53447000	0	0	0	0	0	0	0	0	0	0
+	3.27003	2.22489	4.67475	Q9SX65	Q9SX65	5713	DHNAT1	1,4-dihydroxy-2-naphthoyl-CoA thioesterase 1	Color2 [DarkGray]	1	4		phylloquinone biosynthetic process [GO:0042372];protein homotetramerization [GO:0051289]	peroxisome [GO:0005777]	1,4-dihydroxy-2-naphthoyl-CoA thioesterase activity [GO:0061522];CoA hydrolase activity [GO:0016289]	+	4	4	4	40.4	40.4	40.4	16.712	0	18.401	2454300000	50	61037000	87244000	55045000	28628000	81697000	50060000	40273000	57941000	188110000	216170000	258200000	220260000	82173000	95512000	40350000	51208000	63579000	91001000	79197000	104320000	144350000	116730000
+	5.11949	2.2244	4.67316	Q02166	Q02166	2012	PAT1	Anthranilate phosphoribosyltransferase, chloroplastic	Color2 [DarkGray]	1	4		tryptophan biosynthetic process [GO:0000162]	chloroplast [GO:0009507];chloroplast envelope [GO:0009941];chloroplast stroma [GO:0009570];cytosol [GO:0005829];plastid [GO:0009536]	anthranilate phosphoribosyltransferase activity [GO:0004048]	+	16	16	16	37.8	37.8	37.8	46.52	0	84.126	12048000000	185	450850000	497830000	424270000	460400000	592290000	832810000	728860000	758310000	512800000	502010000	681830000	613670000	277130000	291250000	371490000	393300000	227620000	128000000	268410000	274650000	535430000	798370000
+	4.24848	2.22067	4.6611	P42799	P42799	1788	GSA1	Glutamate-1-semialdehyde 2,1-aminomutase 1, chloroplastic	Color2 [DarkGray]	1	4		chlorophyll biosynthetic process [GO:0015995];porphyrin-containing compound biosynthetic process [GO:0006779];protoporphyrinogen IX biosynthetic process [GO:0006782]	apoplast [GO:0048046];chloroplast [GO:0009507];chloroplast envelope [GO:0009941];chloroplast stroma [GO:0009570];cytosol [GO:0005829];plastid [GO:0009536]	glutamate-1-semialdehyde 2,1-aminomutase activity [GO:0042286];protein homodimerization activity [GO:0042803];pyridoxal phosphate binding [GO:0030170];transaminase activity [GO:0008483]	+	43	26	26	74.1	47.7	47.7	50.369	0	323.31	71376000000	382	329010000	347210000	281220000	269250000	431980000	380060000	376940000	395800000	5484500000	5025200000	5893200000	5226500000	2692700000	3474000000	3468300000	3442400000	4511600000	2765700000	3988500000	4388300000	4683000000	4213300000
+	2.85343	2.2205	4.66055	Q9ZST4	Q9ZST4	5927	GLB1	Nitrogen regulatory protein P-II homolog	Color2 [DarkGray]	1	4		anthocyanin-containing compound biosynthetic process [GO:0009718];nitrogen compound metabolic process [GO:0006807];regulation of arginine biosynthetic process via ornithine [GO:2000013];regulation of fatty acid biosynthetic process [GO:0042304];regulation of nitrogen utilization [GO:0006808];response to light stimulus [GO:0009416];response to sucrose [GO:0009744]	chloroplast [GO:0009507];chloroplast thylakoid [GO:0009534];cytosol [GO:0005829];plastid [GO:0009536]	acetylglutamate kinase regulator activity [GO:0010307];ATP binding [GO:0005524];enzyme regulator activity [GO:0030234];magnesium ion binding [GO:0000287]	+	14	14	14	46.4	46.4	46.4	21.275	0	193.24	32747000000	295	649550000	597260000	465570000	604570000	1040700000	1080900000	1015600000	1115000000	1964800000	1745600000	2043900000	1638000000	1331500000	1667100000	1598400000	1233500000	1345300000	1290300000	1487700000	1497600000	1817600000	1759300000
+	3.36697	2.2155	4.64443	P92947	P92947	1958	MDAR5	Monodehydroascorbate reductase, chloroplastic/mitochondrial	Color2 [DarkGray]	1	4		response to cadmium ion [GO:0046686];response to cold [GO:0009409]	chloroplast [GO:0009507];chloroplast stroma [GO:0009570];mitochondrion [GO:0005739];nucleus [GO:0005634];stromule [GO:0010319]	ATP binding [GO:0005524];flavin adenine dinucleotide binding [GO:0050660];monodehydroascorbate reductase (NADH) activity [GO:0016656]	+	65	65	65	78.1	78.1	78.1	53.301	0	323.31	543140000000	1830	25092000000	25421000000	18711000000	18856000000	30624000000	28648000000	31364000000	29735000000	24198000000	19905000000	25897000000	23741000000	16018000000	18101000000	16761000000	19371000000	20200000000	13790000000	19229000000	19551000000	25929000000	24654000000
+	3.2587	2.21544	4.64423	Q8VWG7	Q8VWG7	3087	TDX	TPR repeat-containing thioredoxin TDX	Color2 [DarkGray]	1	4		cell redox homeostasis [GO:0045454];chaperone cofactor-dependent protein refolding [GO:0051085];chaperone-mediated protein folding [GO:0061077];heat acclimation [GO:0010286];protein complex oligomerization [GO:0051259];protein folding [GO:0006457];protein-containing complex assembly [GO:0065003]		heat shock protein binding [GO:0031072];Hsp70 protein binding [GO:0030544];identical protein binding [GO:0042802];oxidoreductase activity, acting on a sulfur group of donors, disulfide as acceptor [GO:0016671];protein dimerization activity [GO:0046983]	+	15	15	15	46.3	46.3	46.3	42.846	0	35.643	4893600000	95	206560000	171810000	184290000	200990000	275440000	310410000	243450000	267390000	167400000	314070000	288220000	182790000	186250000	160000000	93233000	188300000	151530000	126580000	154280000	127550000	214090000	198260000
+	5.78207	2.21522	4.64351	Q8LD97	Q8LD97	2892	GLYI7	AT1G80160 protein	Color2 [DarkGray]	1	4				lyase activity [GO:0016829]	+	6	6	6	45.5	45.5	45.5	19.029	0	92.588	977490000	23	0	0	0	0	0	0	0	0	243030000	224470000	270980000	239010000	0	0	0	0	0	0	0	0	0	0
+	2.65736	2.21511	4.64318	Q9SZ51	Q9SZ51	5758	ENODL15	Early nodulin-like protein 15	Color2 [DarkGray]	1	4			anchored component of membrane [GO:0031225];anchored component of plasma membrane [GO:0046658];integral component of membrane [GO:0016021];plasma membrane [GO:0005886];secretory vesicle [GO:0099503]	electron transfer activity [GO:0009055]	+	7	7	7	33.9	33.9	33.9	18.961	0	19.576	2772800000	76	98661000	101580000	88830000	102890000	201000000	157990000	160500000	153100000	153560000	153580000	145670000	143830000	55035000	36873000	84134000	102290000	92925000	36754000	100120000	76459000	129760000	137120000
+	3.35708	2.21467	4.64175	Q9C712	Q9C712	3721	pde194	Formyl transferase, putative	Color2 [DarkGray]	1	4		conversion of methionyl-tRNA to N-formyl-methionyl-tRNA [GO:0071951]	mitochondrion [GO:0005739]	methionyl-tRNA formyltransferase activity [GO:0004479]	+	17	17	17	53.2	53.2	53.2	38.502	0	81.993	6417600000	131	0	0	5074800	0	0	18758000	12427000	0	560290000	540140000	631060000	547940000	241990000	229850000	309620000	282300000	330230000	272490000	319480000	329410000	450240000	429010000
+	3.41294	2.21434	4.6407	F4JWX3	F4JWX3	948	GDPD2	PLC-like phosphodiesterases superfamily protein	Color2 [DarkGray]	1	4		lipid metabolic process [GO:0006629]		phosphoric diester hydrolase activity [GO:0008081]	+	9	9	9	33.8	33.8	33.8	40.357	0	23.288	1333100000	38	0	14711000	0	6914300	102890000	111890000	92849000	80663000	228750000	178930000	261540000	215530000	0	30199000	0	0	0	8199300	0	0	0	0
+	6.32122	2.21088	4.62958	Q8H1S0;A0A1P8BGX3	Q8H1S0	2746	MIOX4	Inositol oxygenase 4	Color2 [DarkGray]	1	4		inositol catabolic process [GO:0019310];L-ascorbic acid biosynthetic process [GO:0019853]	cytoplasm [GO:0005737]	inositol oxygenase activity [GO:0050113];iron ion binding [GO:0005506]	+	9	9	9	25.2	25.2	25.2	36.903	0	24.772	1002200000	26	0	0	0	0	0	0	0	0	243970000	249660000	268520000	213740000	0	0	0	0	11531000	0	0	0	7519100	0
+	4.82252	2.21078	4.62925	P53492	P53492	1886	ACT7	Actin-7	Color2 [DarkGray]	1	4		cell division [GO:0051301];Golgi to plasma membrane transport [GO:0006893];protein localization [GO:0008104];response to auxin [GO:0009733];response to light stimulus [GO:0009416];response to wounding [GO:0009611];root development [GO:0048364];root epidermal cell differentiation [GO:0010053];root hair elongation [GO:0048767];seed germination [GO:0009845]	cell wall [GO:0005618];chloroplast envelope [GO:0009941];chloroplast stroma [GO:0009570];cytoskeleton [GO:0005856];cytosol [GO:0005829];mitochondrion [GO:0005739];nucleolus [GO:0005730];plasma membrane [GO:0005886];plasmodesma [GO:0009506]	ATP binding [GO:0005524];structural constituent of cytoskeleton [GO:0005200]	+	56	56	20	85.4	85.4	38.5	41.735	0	323.31	1130100000000	2461	88053000000	97166000000	79681000000	82608000000	88497000000	88307000000	86997000000	89108000000	29395000000	29153000000	28299000000	29528000000	21012000000	25981000000	23364000000	26473000000	23187000000	17766000000	23316000000	24802000000	32090000000	31249000000
+	6.92736	2.20931	4.62453	Q9FGT8	Q9FGT8	3958	TIL	Temperature-induced lipocalin-1	Color2 [DarkGray]	1	4		cellular chloride ion homeostasis [GO:0030644];cellular response to hypoxia [GO:0071456];cellular sodium ion homeostasis [GO:0006883];heat acclimation [GO:0010286];hyperosmotic salinity response [GO:0042538];lipid metabolic process [GO:0006629];positive regulation of response to oxidative stress [GO:1902884];positive regulation of response to salt stress [GO:1901002];response to cold [GO:0009409]…	chloroplast envelope [GO:0009941];chloroplast membrane [GO:0031969];cytoplasm [GO:0005737];cytoplasmic side of plasma membrane [GO:0009898];cytosol [GO:0005829];endoplasmic reticulum [GO:0005783];Golgi apparatus [GO:0005794];mitochondrion [GO:0005739];plasma membrane [GO:0005886];plasmodesma [GO:0009506];plastid [GO:0009536];vacuolar membrane [GO:0005774];vacuole [GO:0005773]	nutrient reservoir activity [GO:0045735]	+	21	21	21	72.6	72.6	72.6	21.434	0	152.71	13366000000	204	581110000	624040000	291060000	354490000	403120000	440590000	429440000	456930000	1180800000	1140600000	1685700000	1333400000	196760000	273360000	318300000	338580000	398500000	186020000	432630000	362300000	578440000	495970000
+	2.44599	2.20824	4.6211	Q75W54	Q75W54	2489	EBM	Mannosylglycoprotein endo-beta-mannosidase	Color2 [DarkGray]	1	4		carbohydrate metabolic process [GO:0005975]	vacuole [GO:0005773]	mannosylglycoprotein endo-beta-mannosidase activity [GO:0033947]	+	55	55	55	62.5	62.5	62.5	107.66	0	323.31	37979000000	570	1300300000	1218300000	861970000	836550000	1951400000	1419200000	1898400000	1392800000	1603600000	1385400000	1658100000	1538900000	2855500000	3148800000	1071300000	1177200000	1094600000	3585600000	1120600000	1169200000	1593500000	1229100000
+	3.46706	2.20395	4.60741	F4IXW2	F4IXW2	748	BIG5	Brefeldin A-inhibited guanine nucleotide-exchange protein 5	Color2 [DarkGray]	1	4		defense response to bacterium [GO:0042742];endocytosis [GO:0006897];immune response [GO:0006955];innate immune response [GO:0045087];protein transport [GO:0015031];regulation of ARF protein signal transduction [GO:0032012];vesicle-mediated transport [GO:0016192];viral process [GO:0016032]	cytosol [GO:0005829];early endosome [GO:0005769];early endosome membrane [GO:0031901];trans-Golgi network [GO:0005802]	ARF guanyl-nucleotide exchange factor activity [GO:0005086]	+	122	122	118	61.6	61.6	60.6	192.88	0	323.31	67001000000	685	7629200000	8653500000	6387900000	6728900000	8990200000	9363800000	8492800000	9355800000	112660000	123310000	157020000	176070000	50036000	54343000	28472000	15395000	28170000	141300000	47537000	56096000	80785000	126940000
+	4.53331	2.20244	4.60257	Q9ZV52	Q9ZV52	5978	EGC2	EG45-like domain containing protein 2	Color2 [DarkGray]	1	4		alternative respiration [GO:0010230];systemic acquired resistance [GO:0009627]	apoplast [GO:0048046];cell wall [GO:0005618]		+	8	8	8	53.1	53.1	53.1	14.518	0	53.843	8973100000	68	0	0	0	0	0	0	0	0	674350000	580100000	801170000	780850000	486360000	525680000	536580000	574600000	360970000	250920000	377790000	412770000	648310000	712110000
+	2.60636	2.20148	4.59951	Q9SU13	Q9SU13	5623	FLA2	Fasciclin-like arabinogalactan protein 2	Color2 [DarkGray]	1	4			anchored component of membrane [GO:0031225];anchored component of plasma membrane [GO:0046658];cytosol [GO:0005829];plasma membrane [GO:0005886];vacuolar membrane [GO:0005774]		+	27	27	27	49.4	49.4	49.4	43.448	0	323.31	80914000000	528	1244600000	1349200000	993360000	906950000	879590000	1107400000	1056500000	1189700000	6837000000	6559300000	4811600000	4224300000	4373800000	5449700000	3355500000	5427800000	3508100000	3788500000	3508500000	3407900000	4446100000	3984500000
+	4.13432	2.20125	4.59877	Q93VR4	Q93VR4	3283	MLP423	MLP-like protein 423	Color2 [DarkGray]	1	4		abscisic acid-activated signaling pathway [GO:0009738];defense response [GO:0006952]	cytosol [GO:0005829];nucleus [GO:0005634]	abscisic acid binding [GO:0010427];protein phosphatase inhibitor activity [GO:0004864];signaling receptor activity [GO:0038023]	+	24	24	24	87.7	87.7	87.7	17.054	0	166.47	24793000000	191	0	0	0	0	0	8157700	12635000	0	2087600000	1937200000	2231800000	1991700000	975930000	966420000	1250900000	1238700000	962360000	796150000	1247400000	1011100000	1867200000	1951800000
+	3.71007	2.19474	4.57807	Q42403	Q42403	2265	TRX3	Thioredoxin H3	Color2 [DarkGray]	1	4		cell redox homeostasis [GO:0045454];defense response to fungus [GO:0050832];heat acclimation [GO:0010286];protein complex oligomerization [GO:0051259];protein folding [GO:0006457];response to heat [GO:0009408];response to microbial phytotoxin [GO:0010188]	cell wall [GO:0005618];chloroplast [GO:0009507];chloroplast stroma [GO:0009570];cytosol [GO:0005829];Golgi apparatus [GO:0005794];mitochondrion [GO:0005739];plasma membrane [GO:0005886];plasmodesma [GO:0009506];plastid [GO:0009536];vacuole [GO:0005773]	oxidoreductase activity, acting on a sulfur group of donors, disulfide as acceptor [GO:0016671]	+	20	20	20	99.2	99.2	99.2	13.109	0	323.31	153100000000	548	13615000000	13626000000	10759000000	10082000000	13941000000	13106000000	14806000000	13873000000	3113000000	2865900000	3459900000	4201800000	1665100000	2302200000	2872300000	2303200000	3205400000	1678700000	3099500000	3238300000	3871600000	3178600000
+	3.63483	2.19085	4.56575	Q8VZF1	Q8VZF1	3180	AAE7	Acetate/butyrate--CoA ligase AAE7, peroxisomal	Color2 [DarkGray]	1	4		acetate metabolic process [GO:0006083];butyrate metabolic process [GO:0019605];glyoxylate cycle [GO:0006097]	cytosol [GO:0005829];peroxisome [GO:0005777]	acetate-CoA ligase activity [GO:0003987];butyrate-CoA ligase activity [GO:0047760]	+	50	50	50	57.8	57.8	57.8	62.956	0	323.31	73514000000	638	1118300000	1036700000	680960000	705680000	1164500000	1429400000	1245800000	1362400000	4419400000	4834500000	5068400000	4991200000	3249900000	3825900000	3381400000	3310400000	3993800000	2853600000	3993000000	4022800000	4046400000	4033200000
+	3.15706	2.18946	4.56134	P32069	P32069	1720	ASA2	Anthranilate synthase alpha subunit 2, chloroplastic	Color2 [DarkGray]	1	4		tryptophan biosynthetic process [GO:0000162]	anthranilate synthase complex [GO:0005950];chloroplast [GO:0009507]	anthranilate synthase activity [GO:0004049]	+	30	26	26	42.2	37	37	69.815	0	55.72	9231700000	186	271840000	488820000	238910000	182310000	285210000	384670000	307400000	317960000	601000000	469140000	690730000	449470000	356890000	347960000	376870000	292380000	509890000	282590000	301840000	253130000	505770000	400630000
+	2.60798	2.18577	4.5497	O04035	O04035	1077	At1g08940	Phosphoglycerate mutase-like protein AT74H	Color2 [DarkGray]	1	4				phosphatase activity [GO:0016791]	+	5	5	5	24.9	24.9	24.9	32.678	0	24.859	781070000	15	56926000	78830000	46438000	50062000	60761000	77566000	73632000	47904000	55239000	37790000	49954000	41557000	5270000	10275000	4686600	16367000	12222000	0	8241200	8108400	13012000	7230200
+	4.83564	2.18102	4.53475	Q9XI31	Q9XI31	5840	GLYI4	AT1G15380 protein	Color2 [DarkGray]	1	4		regulation of abscisic acid-activated signaling pathway [GO:0009787];regulation of jasmonic acid mediated signaling pathway [GO:2000022];regulation of salicylic acid mediated signaling pathway [GO:2000031]		lyase activity [GO:0016829]	+	10	10	10	56.9	56.9	56.9	19.593	0	42.252	1665000000	36	0	0	34166000	5515900	70142000	70742000	36579000	61625000	358740000	246770000	463300000	317470000	0	0	0	0	0	0	0	0	0	0
+	2.98571	2.18071	4.53376	Q9XI87	Q9XI87	5849	VH1-interacting kinase	At1g14000	Color2 [DarkGray]	1	4		auxin-activated signaling pathway [GO:0009734];brassinosteroid mediated signaling pathway [GO:0009742];leaf vascular tissue pattern formation [GO:0010305]	extracellular region [GO:0005576]	ATP binding [GO:0005524];protein kinase activity [GO:0004672];protein serine/threonine kinase activity [GO:0004674];protein serine/threonine/tyrosine kinase activity [GO:0004712]	+	43	43	42	61.4	61.4	61.4	49.335	0	139.14	28273000000	571	1248200000	1397000000	876990000	767290000	1773900000	1583600000	1167300000	1498500000	1630600000	1308800000	1844900000	1387700000	578830000	698660000	1059300000	675800000	1145300000	560650000	1177900000	1014700000	1229600000	1008800000
+	2.58192	2.17992	4.53128	Q9LPT6	Q9LPT6	4618	OTU2	OVARIAN TUMOR DOMAIN-containing deubiquitinating enzyme 2	Color2 [DarkGray]	1	4		endoplasmic reticulum unfolded protein response [GO:0030968];protein deubiquitination [GO:0016579];ubiquitin-dependent ERAD pathway [GO:0030433]	cytosol [GO:0005829];nucleus [GO:0005634]	thiol-dependent ubiquitin-specific protease activity [GO:0004843]	+	17	17	17	72.1	72.1	72.1	23.425	0	205.74	35366000000	241	1708300000	1639700000	1160500000	1422300000	1899500000	1727800000	1918700000	1590200000	1038900000	1306400000	1891000000	1920300000	700750000	990910000	1391700000	1317800000	1338500000	738320000	1683000000	1932200000	1287400000	1287400000
+	3.37262	2.17433	4.51375	Q8L9A9	Q8L9A9	2837	XTH8	Probable xyloglucan endotransglucosylase/hydrolase protein 8	Color2 [DarkGray]	1	4		cell wall biogenesis [GO:0042546];cell wall organization [GO:0071555];xyloglucan metabolic process [GO:0010411]	apoplast [GO:0048046];cell wall [GO:0005618]	hydrolase activity, hydrolyzing O-glycosyl compounds [GO:0004553];xyloglucan:xyloglucosyl transferase activity [GO:0016762]	+	8	8	8	23.3	23.3	23.3	35.564	0	5.1903	1207800000	39	93520000	96573000	44018000	40307000	85578000	46796000	74299000	56232000	71893000	70631000	89593000	101120000	23741000	25799000	36673000	27467000	22666000	18388000	9981000	18045000	65979000	24183000
+	4.40201	2.17378	4.51205	Q39230	Q39230	2216	At5g27470	Serine--tRNA ligase, cytoplasmic	Color2 [DarkGray]	1	4		response to cadmium ion [GO:0046686];selenocysteinyl-tRNA(Sec) biosynthetic process [GO:0097056];seryl-tRNA aminoacylation [GO:0006434]	cytosol [GO:0005829];plastid [GO:0009536]	ATP binding [GO:0005524];serine-tRNA ligase activity [GO:0004828];tRNA binding [GO:0000049]	+	62	62	62	83.6	83.6	83.6	51.628	0	323.31	69384000000	785	3813500000	4040900000	2660700000	3259000000	5036900000	5332500000	5536300000	5217800000	3138000000	2983400000	3486400000	2715700000	1053700000	1400100000	1609200000	1670900000	2029000000	1161900000	1839600000	1826600000	2712900000	2141200000
+	5.06686	2.17322	4.5103	Q8LDN8	Q8LDN8	2898	UGE3	Bifunctional UDP-glucose 4-epimerase and UDP-xylose 4-epimerase 3	Color2 [DarkGray]	1	4		capsule polysaccharide biosynthetic process [GO:0045227];cell wall organization [GO:0071555];galactose metabolic process [GO:0006012];pollen development [GO:0009555];rRNA processing [GO:0006364];UDP-L-arabinose biosynthetic process [GO:0033358]	cytosol [GO:0005829]	RNA binding [GO:0003723];UDP-arabinose 4-epimerase activity [GO:0050373];UDP-glucose 4-epimerase activity [GO:0003978]	+	19	8	8	51.6	28.8	28.8	38.91	0	16.982	1646300000	28	0	5837600	0	0	21599000	18634000	12101000	17781000	284740000	336310000	348610000	332380000	14668000	19737000	9816700	15700000	15249000	23326000	68381000	22098000	19568000	28371000
+	2.97679	2.17302	4.50966	Q8VY06	Q8VY06	3101	PREP2	Presequence protease 2, chloroplastic/mitochondrial	Color2 [DarkGray]	1	4		protein processing [GO:0016485]	chloroplast [GO:0009507];chloroplast stroma [GO:0009570];mitochondrial matrix [GO:0005759];mitochondrion [GO:0005739];nucleus [GO:0005634]	metal ion binding [GO:0046872];metalloendopeptidase activity [GO:0004222]	+	45	20	20	42.8	21.9	21.9	121.13	0	98.378	6640300000	146	46444000	76686000	59793000	39076000	143220000	83402000	75872000	93127000	550250000	437540000	599870000	487920000	246580000	270960000	323280000	319250000	346500000	186720000	341020000	395730000	374060000	336310000
+	3.76633	2.17261	4.50837	Q9FIW4	Q9FIW4	4035	BGLU42	Beta-glucosidase 42	Color2 [DarkGray]	1	4		cellulose catabolic process [GO:0030245];induced systemic resistance, ethylene mediated signaling pathway [GO:0009866];positive regulation of defense response [GO:0031349];response to bacterium [GO:0009617];response to iron ion starvation [GO:1990641];secondary metabolic process [GO:0019748]	cytosol [GO:0005829]	beta-glucosidase activity [GO:0008422];scopolin beta-glucosidase activity [GO:0102483]	+	24	24	24	48.2	48.2	48.2	56.076	0	276.02	17796000000	290	513320000	416050000	360770000	387120000	494650000	435870000	537770000	497060000	897370000	777210000	997500000	650690000	757790000	884940000	936720000	1021300000	820630000	678510000	850630000	630540000	1238200000	1069600000
+	3.14583	2.17236	4.50761	Q9M0A5	Q9M0A5	4938	GGP3	Gamma-glutamyl peptidase 3	Color2 [DarkGray]	1	4		glucosinolate metabolic process [GO:0019760]	cytoplasm [GO:0005737];cytosol [GO:0005829]	peptidase activity [GO:0008233]	+	10	9	9	37.8	34.1	34.1	28.224	0	53.08	2901200000	84	248640000	179110000	102450000	220360000	192580000	114860000	128750000	220200000	146710000	123560000	165850000	172240000	29173000	60533000	78101000	50647000	48269000	83980000	67715000	71417000	116110000	66412000
+	4.10894	2.17234	4.50754	F4KBF3	F4KBF3	1037	AAE17	Probable acyl-activating enzyme 17, peroxisomal	Color2 [DarkGray]	1	4		fatty acid metabolic process [GO:0006631]	peroxisome [GO:0005777]	ligase activity [GO:0016874]	+	29	29	28	42.9	42.9	41.3	79.18	0	142.02	7547900000	157	229060000	263890000	166260000	210710000	335900000	486800000	462700000	1051100000	589740000	451010000	630240000	956330000	82511000	75509000	150550000	126060000	139490000	82817000	102700000	142310000	173290000	101290000
+	4.91515	2.1714	4.50461	O04420	O04420	1101	At2g26230	Uricase	Color2 [DarkGray]	1	4		peroxisome organization [GO:0007031];purine nucleobase metabolic process [GO:0006144];urate catabolic process [GO:0019628]	cytosol [GO:0005829];peroxisome [GO:0005777]	urate oxidase activity [GO:0004846]	+	29	29	29	65.4	65.4	65.4	34.88	0	211.36	14843000000	266	1340800000	1491900000	1107500000	1127300000	1404300000	1262100000	1294200000	1142300000	461560000	451520000	520030000	452460000	125320000	201050000	181340000	202270000	143590000	120870000	164150000	207850000	347350000	332040000
+	6.55794	2.17104	4.50349	Q9SGU9	Q9SGU9	5320	MGL	Methionine gamma-lyase	Color2 [DarkGray]	1	4		cellular response to sulfate starvation [GO:0009970];cellular response to water deprivation [GO:0042631];methionine catabolic process via 2-oxobutanoate [GO:0019458];protein homotetramerization [GO:0051289];transsulfuration [GO:0019346]	cytoplasm [GO:0005737];cytosol [GO:0005829]	carbon-sulfur lyase activity [GO:0016846];methionine gamma-lyase activity [GO:0018826];pyridoxal phosphate binding [GO:0030170]	+	30	30	30	65.8	65.8	65.8	47.82	0	323.31	14524000000	168	168180000	137560000	66394000	81789000	38151000	31344000	7601000	55327000	3562600000	3013200000	3949900000	3383700000	0	0	0	0	12237000	0	0	0	0	0
+	2.67592	2.16977	4.49951	Q9LT77	Q9LT77	4703	RDL2	Probable cysteine protease RDL2	Color2 [DarkGray]	1	4		proteolysis involved in cellular protein catabolic process [GO:0051603]	cytosol [GO:0005829];extracellular space [GO:0005615];lysosome [GO:0005764]	cysteine-type endopeptidase activity [GO:0004197]	+	11	11	11	32	32	32	40.29	0	52.349	6008100000	65	434790000	451080000	273260000	318290000	491920000	501510000	356890000	390250000	195500000	186630000	255430000	347080000	127870000	99942000	226520000	102570000	72557000	161050000	190810000	140460000	202280000	150460000
+	2.98185	2.16943	4.49846	Q94CE4	Q94CE4	3532	BCA4	Beta carbonic anhydrase 4	Color2 [DarkGray]	1	4		carbon utilization [GO:0015976];cyanate catabolic process [GO:0009440];negative regulation of stomatal complex development [GO:2000122];regulation of stomatal movement [GO:0010119];response to carbon dioxide [GO:0010037]	chloroplast envelope [GO:0009941];cytosol [GO:0005829];mitochondrion [GO:0005739];plasma membrane [GO:0005886]	carbonate dehydratase activity [GO:0004089];zinc ion binding [GO:0008270]	+	43	43	41	89.3	89.3	89.3	30.836	0	323.31	83533000000	728	4258300000	4348400000	3136500000	3074500000	4881500000	4979400000	4918900000	5035800000	3604300000	3119700000	4837000000	3460100000	1837600000	2459000000	2581500000	2423700000	3128600000	1612700000	3268400000	3102900000	3648700000	3268100000
+	4.43288	2.16702	4.49094	Q93Y40	Q93Y40	3319	ORP3C	Oxysterol-binding protein-related protein 3C	Color2 [DarkGray]	1	4			cytosol [GO:0005829];intracellular membrane-bounded organelle [GO:0043231];membrane [GO:0016020];plastid [GO:0009536]	lipid binding [GO:0008289];sterol binding [GO:0032934];sterol transporter activity [GO:0015248]	+	28	26	25	61.5	58.2	54	51.966	0	323.31	16402000000	231	1421500000	1731100000	1185900000	1224200000	1809300000	1552700000	1732100000	1508600000	262060000	322820000	326010000	408820000	114010000	234480000	186060000	317000000	158830000	100980000	148050000	179100000	326880000	300800000
+	2.55905	2.15934	4.46709	A8MR97	A8MR97	387	EIF4G	Eukaryotic translation initiation factor 4G	Color2 [DarkGray]	1	4				translation initiation factor activity [GO:0003743]	+	39	39	39	24.2	24.2	24.2	187.55	0	244.99	9720700000	203	691880000	813380000	524100000	596830000	1217500000	1340000000	1161600000	1299700000	195470000	170860000	193080000	128830000	109210000	154660000	125450000	117770000	98342000	52344000	86635000	112490000	81189000	151020000
+	2.52579	2.15759	4.46169	Q9FZ87	Q9FZ87	4342	GH3.17	Indole-3-acetic acid-amido synthetase GH3.17	Color2 [DarkGray]	1	4		auxin homeostasis [GO:0010252];response to auxin [GO:0009733]	cytoplasm [GO:0005737];nucleus [GO:0005634]	acid-amino acid ligase activity [GO:0016881];indole-3-acetic acid amido synthetase activity [GO:0010279]	+	31	31	29	57.6	57.6	57.6	68.863	0	243.23	9326800000	134	843800000	1029400000	862380000	788740000	1379400000	1509500000	1146300000	1408600000	24466000	9732500	26682000	21134000	0	0	0	0	0	70705000	0	10675000	0	97514000
+	2.09842	2.15268	4.44653	O22229	O22229	1136	NTRC	NADPH-dependent thioredoxin reductase 3	Color2 [DarkGray]	1	4		cell redox homeostasis [GO:0045454];hydrogen peroxide catabolic process [GO:0042744];positive regulation of catalytic activity [GO:0043085];regulation of chlorophyll biosynthetic process [GO:0010380];regulation of starch biosynthetic process [GO:0010581];removal of superoxide radicals [GO:0019430]	chloroplast [GO:0009507];chloroplast stroma [GO:0009570];cytosol [GO:0005829]	enzyme activator activity [GO:0008047];identical protein binding [GO:0042802];oxidoreductase activity, acting on a sulfur group of donors, disulfide as acceptor [GO:0016671];thioredoxin-disulfide reductase activity [GO:0004791]	+	33	33	33	52.2	52.2	52.2	57.949	0	323.31	85369000000	459	241510000	202810000	1185500000	350750000	209130000	282470000	162920000	204230000	5933300000	5463000000	7174600000	6202200000	3921300000	4148800000	4887200000	4704100000	4701700000	3019000000	4889000000	5186300000	5480700000	5286900000
+	1.84063	2.1482	4.43273	Q8H1Y0	Q8H1Y0	2750	IAR4	Pyruvate dehydrogenase E1 component subunit alpha-2, mitochondrial	Color2 [DarkGray]	1	4		acetyl-CoA biosynthetic process from pyruvate [GO:0006086];glycolytic process [GO:0006096]	cytosol [GO:0005829];mitochondrial pyruvate dehydrogenase complex [GO:0005967];mitochondrion [GO:0005739];nucleus [GO:0005634]	cobalt ion binding [GO:0050897];pyruvate dehydrogenase (acetyl-transferring) activity [GO:0004739];zinc ion binding [GO:0008270]	+	58	58	45	68.2	68.2	59.8	43.358	0	323.31	148760000000	864	11791000000	13615000000	9996000000	9912800000	18745000000	17400000000	16239000000	17684000000	2294500000	1804200000	2549600000	1621400000	1516000000	1787700000	1865800000	2027400000	2161300000	1340200000	1933800000	2169100000	2538800000	2484600000
+	3.09809	2.14698	4.429	Q9M0F5	Q9M0F5	4945	At4g29260	Acid phosphatase-like protein	Color2 [DarkGray]	1	4			cytosol [GO:0005829];secretory vesicle [GO:0099503];vacuolar membrane [GO:0005774];vacuole [GO:0005773]	acid phosphatase activity [GO:0003993]	+	22	21	21	51.4	51.4	51.4	28.906	0	222.03	16569000000	274	499310000	607190000	397090000	484870000	727770000	620320000	599810000	687110000	900850000	931260000	981020000	907050000	597690000	645430000	529480000	670500000	686540000	480350000	607610000	606070000	954080000	745900000
+	2.64557	2.14693	4.42885	Q9SK27	Q9SK27	5426	At2g25060	Early nodulin-like protein 1	Color2 [DarkGray]	1	4			anchored component of membrane [GO:0031225];anchored component of plasma membrane [GO:0046658];plasma membrane [GO:0005886];plasmodesma [GO:0009506];secretory vesicle [GO:0099503];vacuole [GO:0005773]	electron transfer activity [GO:0009055]	+	5	5	5	19.2	19.2	19.2	19.482	0	8.8345	1330600000	54	34503000	43193000	24703000	25705000	51626000	57511000	58278000	42193000	76762000	115610000	60125000	104060000	46254000	49113000	47338000	60254000	47278000	51170000	49979000	44053000	65906000	48300000
+	2.64765	2.14339	4.41799	F4IP94	F4IP94	708	ML2	MEI2-like 2	Color2 [DarkGray]	1	4				RNA binding [GO:0003723]	+	8	8	8	12	12	12	91.899	0	10.657	1448500000	46	178580000	162560000	172100000	160300000	137920000	135630000	112120000	122270000	35999000	45007000	76223000	70898000	5034300	5622900	6157200	2312300	0	1174000	5175900	3355100	0	1154200
+	4.38815	2.13674	4.39767	F4K470	F4K470	996	DIN10	Raffinose synthase family protein	Color2 [DarkGray]	1	4		cellular response to hypoxia [GO:0071456];response to cold [GO:0009409];response to karrikin [GO:0080167];response to oxidative stress [GO:0006979]	chloroplast [GO:0009507];cytosol [GO:0005829];plasmodesma [GO:0009506]	catalytic activity [GO:0003824];mRNA binding [GO:0003729]	+	55	55	52	57.2	57.2	55.6	94.215	0	282.51	23233000000	314	823020000	1014400000	753990000	607250000	1790400000	1698300000	1511800000	1646800000	3187900000	2963800000	3843700000	3258500000	22653000	0	0	9868700	24030000	1132600	43431000	11593000	15231000	5330500
+	4.51502	2.13535	4.39344	Q9C969	Q9C969	3794	ISS1	Aromatic aminotransferase ISS1	Color2 [DarkGray]	1	4		aromatic amino acid family metabolic process [GO:0009072];auxin biosynthetic process [GO:0009851];auxin homeostasis [GO:0010252];ethylene biosynthetic process [GO:0009693];L-phenylalanine metabolic process [GO:0006558];methionine metabolic process [GO:0006555];negative regulation of ethylene biosynthetic process [GO:0010366];negative regulation of indoleacetic acid biosynthetic process via trypto…	cytoplasm [GO:0005737];cytosol [GO:0005829];mitochondrion [GO:0005739]	L-tryptophan:2-oxoglutarate aminotransferase activity [GO:0050362];L-tyrosine:2-oxoglutarate aminotransferase activity [GO:0004838];methionine-oxo-acid transaminase activity [GO:0010326];pyridoxal phosphate binding [GO:0030170];transaminase activity [GO:0008483]	+	25	25	25	56.3	56.3	56.3	43.761	0	323.31	20700000000	274	1864100000	1539000000	1461100000	1285400000	2248000000	2296700000	2164100000	2065500000	458000000	599190000	490550000	413710000	256430000	373670000	270410000	393540000	183830000	127690000	190230000	250330000	581710000	276890000
+	2.17445	2.13405	4.38947	O78310	O78310	1428	CSD2	Superoxide dismutase [Cu-Zn] 2, chloroplastic	Color2 [DarkGray]	1	4		cellular response to light intensity [GO:0071484];cellular response to oxidative stress [GO:0034599];cellular response to ozone [GO:0071457];cellular response to salt stress [GO:0071472];cellular response to sucrose stimulus [GO:0071329];cellular response to UV-B [GO:0071493];gene silencing by miRNA [GO:0035195];removal of superoxide radicals [GO:0019430];response to copper ion [GO:0046688];respo…	apoplast [GO:0048046];chloroplast [GO:0009507];chloroplast stroma [GO:0009570];extracellular region [GO:0005576];extracellular space [GO:0005615];thylakoid [GO:0009579]	copper ion binding [GO:0005507];superoxide dismutase activity [GO:0004784]	+	11	11	11	69.9	69.9	69.9	22.244	0	323.31	262540000000	532	261890000	583640000	387820000	530450000	625060000	442160000	364090000	565100000	17065000000	19194000000	18814000000	18125000000	11824000000	12899000000	15244000000	13889000000	15693000000	7727600000	15919000000	14708000000	19764000000	17837000000
+	4.28807	2.13382	4.38877	F4HWL4	F4HWL4	566	At1g28350	Tyrosine--tRNA ligase 2, cytoplasmic	Color2 [DarkGray]	1	4		tRNA aminoacylation for protein translation [GO:0006418]	cytosol [GO:0005829]	ATP binding [GO:0005524];tyrosine-tRNA ligase activity [GO:0004831]	+	39	39	34	50	50	43.4	84.717	0	113.02	22573000000	286	940250000	913700000	618160000	579800000	1280200000	1385800000	1123600000	1118000000	1155100000	1049600000	1346000000	1139800000	633870000	769490000	805120000	864150000	765980000	478510000	894120000	966960000	1122900000	969940000
+	4.59875	2.1338	4.38872	Q93ZB6	Q93ZB6	3348	HEME1	Uroporphyrinogen decarboxylase 1, chloroplastic	Color2 [DarkGray]	1	4		chlorophyll biosynthetic process [GO:0015995];protoporphyrinogen IX biosynthetic process [GO:0006782];response to cadmium ion [GO:0046686]	chloroplast [GO:0009507];chloroplast stroma [GO:0009570]	uroporphyrinogen decarboxylase activity [GO:0004853]	+	39	39	39	64.1	64.1	64.1	46.254	0	323.31	86224000000	630	140040000	120880000	69784000	113150000	111540000	137660000	172420000	171690000	6988100000	7184200000	7924800000	7191200000	3747500000	4269400000	4087900000	3885200000	4975500000	3263500000	4682200000	4485500000	7025800000	5272100000
+	3.45476	2.13204	4.38336	P34790	P34790	1732	CYP18-3	Peptidyl-prolyl cis-trans isomerase CYP18-3	Color2 [DarkGray]	1	4		blue light signaling pathway [GO:0009785];brassinosteroid mediated signaling pathway [GO:0009742];de-etiolation [GO:0009704];plant-type hypersensitive response [GO:0009626];protein folding [GO:0006457];protein peptidyl-prolyl isomerization [GO:0000413];red, far-red light phototransduction [GO:0009585];regulation of protein phosphorylation [GO:0001932];response to cadmium ion [GO:0046686];response…	apoplast [GO:0048046];cytoplasm [GO:0005737];cytosol [GO:0005829];plasma membrane [GO:0005886]	cyclosporin A binding [GO:0016018];peptidyl-prolyl cis-trans isomerase activity [GO:0003755]	+	30	30	18	99.4	99.4	76.2	18.373	0	323.31	339840000000	1116	19991000000	20032000000	16328000000	17400000000	28999000000	26701000000	27494000000	25362000000	10942000000	10409000000	12383000000	11763000000	6896500000	8854000000	8699800000	9734800000	8403800000	5617800000	8010300000	8739100000	11339000000	11842000000
+	2.32356	2.13007	4.37739	Q9SHJ8	Q9SHJ8	5336	At1g06550	3-hydroxyisobutyryl-CoA hydrolase-like protein 5	Color2 [DarkGray]	1	4		response to karrikin [GO:0080167];valine catabolic process [GO:0006574]	cytosol [GO:0005829];extracellular region [GO:0005576]	3-hydroxyisobutyryl-CoA hydrolase activity [GO:0003860]	+	44	44	44	84.2	84.2	84.2	43.257	0	323.31	36649000000	322	4289400000	4577700000	3825500000	3878700000	4788000000	5090200000	4207200000	4599700000	178460000	111650000	147490000	96116000	65163000	82837000	78723000	86852000	41283000	18587000	41618000	42800000	71724000	135600000
+	3.00741	2.1289	4.37383	Q9LV48;O64477	Q9LV48	4765	PERK1	Proline-rich receptor-like protein kinase PERK1	Color2 [DarkGray]	1	4		protein autophosphorylation [GO:0046777];protein phosphorylation [GO:0006468];response to fungus [GO:0009620];response to wounding [GO:0009611]	integral component of membrane [GO:0016021];plasma membrane [GO:0005886]	ATP binding [GO:0005524];protein kinase activity [GO:0004672];protein serine/threonine kinase activity [GO:0004674];transmembrane receptor protein serine/threonine kinase activity [GO:0004675]	+	8	8	6	14	14	11.5	69.271	0	9.2537	1146900000	29	96486000	105060000	73075000	76505000	45636000	74435000	98389000	78514000	55124000	48351000	83566000	38087000	17402000	40332000	24402000	27817000	21244000	1607000	22290000	20533000	19653000	23167000
+	4.0929	2.12694	4.36789	Q8H113	Q8H113	2717	DIN11	Probable 2-oxoglutarate-dependent dioxygenase DIN11	Color2 [DarkGray]	1	4				dioxygenase activity [GO:0051213];metal ion binding [GO:0046872]	+	14	13	13	39.2	37.3	37.3	40.696	0	37.2	1257400000	39	38002000	0	5143300	18023000	0	0	0	7623300	328770000	250710000	303900000	305280000	0	0	0	0	0	0	0	0	0	0
+	2.5321	2.1268	4.36749	O23240	O23240	1212	D2HGDH	D-2-hydroxyglutarate dehydrogenase, mitochondrial	Color2 [DarkGray]	1	4		nitrogen compound metabolic process [GO:0006807];photorespiration [GO:0009853]	mitochondrion [GO:0005739];plasma membrane [GO:0005886]	(R)-2-hydroxyglutarate dehydrogenase activity [GO:0051990];2-hydroxyglutarate dehydrogenase activity [GO:0047545];FAD binding [GO:0071949]	+	21	21	21	40.6	40.6	40.6	61.445	0	73.937	7859500000	165	127340000	219180000	206890000	94963000	170660000	159570000	167770000	199840000	411790000	959230000	453970000	905790000	189120000	234820000	267230000	205180000	374520000	222520000	310970000	255980000	786630000	259920000
+	4.12077	2.12408	4.35924	Q8RY29	Q8RY29	3057	ADPG2	Polygalacturonase ADPG2	Color2 [DarkGray]	1	4		anther dehiscence [GO:0009901];cell wall modification involved in abscission [GO:0009830];floral organ abscission [GO:0010227];fruit dehiscence [GO:0010047];pectin catabolic process [GO:0045490]	cell wall [GO:0005618];extracellular region [GO:0005576]	polygalacturonase activity [GO:0004650]	+	8	8	8	19.9	19.9	19.9	46.622	0	26.874	395400000	10	0	0	0	0	0	0	0	0	69496000	70853000	105050000	150010000	0	0	0	0	0	0	0	0	0	0
+	4.09726	2.12345	4.35734	O80449	O80449	1434	ANS	Probable 2-oxoglutarate-dependent dioxygenase ANS	Color2 [DarkGray]	1	4		flavonoid biosynthetic process [GO:0009813];regulation of jasmonic acid mediated signaling pathway [GO:2000022]	cytosol [GO:0005829]	dioxygenase activity [GO:0051213];jasmonic acid hydrolase [GO:0120091];metal ion binding [GO:0046872]	+	10	10	10	33.7	33.7	33.7	39.681	0	43.586	1556900000	27	0	5756600	49370000	13047000	83589000	0	16105000	0	331440000	260460000	319070000	367110000	0	0	97113000	0	0	7919500	0	0	0	5880700
+	2.63225	2.12317	4.3565	Q6NPM8	Q6NPM8	2464	HISN7	Bifunctional phosphatase IMPL2, chloroplastic	Color2 [DarkGray]	1	4		histidine biosynthetic process [GO:0000105];inositol biosynthetic process [GO:0006021];inositol phosphate dephosphorylation [GO:0046855]	chloroplast [GO:0009507]	histidinol-phosphatase activity [GO:0004401];inositol monophosphate 1-phosphatase activity [GO:0008934];inositol monophosphate 3-phosphatase activity [GO:0052832];inositol monophosphate 4-phosphatase activity [GO:0052833];inositol monophosphate phosphatase activity [GO:0052834];metal ion binding [GO:0046872];phosphoric ester hydrolase activity [GO:0042578]	+	12	12	12	43.1	43.1	43.1	38.235	0	78.219	3777200000	86	102160000	98433000	83353000	49273000	115920000	120650000	100280000	164450000	288610000	255080000	312050000	267500000	70314000	90905000	92378000	190150000	128260000	182460000	198870000	103120000	114470000	194640000
+	3.43372	2.12261	4.35482	Q9FIQ0	Q9FIQ0	4031	AGD9	Probable ADP-ribosylation factor GTPase-activating protein AGD9	Color2 [DarkGray]	1	4		COPI coating of Golgi vesicle [GO:0048205];response to abscisic acid [GO:0009737]	Golgi membrane [GO:0000139];plastid [GO:0009536]	GTPase activator activity [GO:0005096];metal ion binding [GO:0046872]	+	18	18	12	51	51	39.1	43.55	0	183.02	83449000000	190	663630000	644940000	481010000	584050000	601710000	701760000	671340000	556320000	5250500000	6611500000	5872400000	6387400000	562450000	5409900000	4287100000	4834300000	4874200000	3005600000	4460500000	6308800000	4150400000	5257700000
+	5.09963	2.12254	4.35459	Q9SN86	Q9SN86	5504	At3g47520	Malate dehydrogenase, chloroplastic	Color2 [DarkGray]	1	4		carbohydrate metabolic process [GO:0005975];chloroplast organization [GO:0009658];embryo development ending in seed dormancy [GO:0009793];malate metabolic process [GO:0006108];protein import into chloroplast stroma [GO:0045037];response to cold [GO:0009409];tricarboxylic acid cycle [GO:0006099]	apoplast [GO:0048046];chloroplast [GO:0009507];chloroplast envelope [GO:0009941];chloroplast inner membrane [GO:0009706];chloroplast stroma [GO:0009570];cytoplasm [GO:0005737];cytosol [GO:0005829];mitochondrion [GO:0005739];plastid [GO:0009536];plastid stroma [GO:0009532];stromule [GO:0010319];vacuolar membrane [GO:0005774];Ycf2/FtsHi complex [GO:0062091]	chloroplast protein-transporting ATPase activity [GO:0016464];L-malate dehydrogenase activity [GO:0030060];NAD(P)+ transhydrogenase activity [GO:0008746]	+	36	36	34	72	72	72	42.405	0	323.31	310190000000	792	13705000000	14694000000	11149000000	10683000000	16246000000	15166000000	15618000000	15663000000	14993000000	13727000000	16095000000	15196000000	8414200000	10312000000	10813000000	10751000000	11929000000	9643200000	12776000000	13437000000	12302000000	11809000000
+	3.97318	2.1214	4.35116	F4ISY3	F4ISY3	725	AGT3	Alanine:glyoxylate aminotransferase 3	Color2 [DarkGray]	1	4				pyridoxal phosphate binding [GO:0030170];transaminase activity [GO:0008483]	+	11	11	11	37.7	37.7	37.7	53.692	0	15.858	1286200000	27	73977000	128270000	32258000	79272000	53314000	91063000	50874000	86686000	155610000	62872000	154400000	173670000	4188500	4569400	13031000	7472800	12024000	4477100	9169600	12819000	11564000	7243800
+	2.59844	2.12005	4.34709	Q9ZPI1	Q9ZPI1	5880	At3g11710	Lysine--tRNA ligase, cytoplasmic	Color2 [DarkGray]	1	4		lysyl-tRNA aminoacylation [GO:0006430]	cytosol [GO:0005829];plasmodesma [GO:0009506]	ATP binding [GO:0005524];DNA binding [GO:0003677];lysine-tRNA ligase activity [GO:0004824];metal ion binding [GO:0046872];tRNA binding [GO:0000049]	+	63	63	63	74	74	74	70.887	0	323.31	57028000000	792	2319700000	2609900000	1978400000	1917500000	6420900000	5355900000	4926700000	4743400000	1845200000	1863400000	2084700000	1730700000	1024900000	1594400000	1587700000	1556800000	1840500000	1062700000	1640000000	1676300000	2105500000	1537600000
+	7.42304	2.11933	4.34492	Q9M439	Q9M439	5048	BCAT2	Branched-chain-amino-acid aminotransferase 2, chloroplastic	Color2 [DarkGray]	1	4		isoleucine biosynthetic process [GO:0009097];leucine biosynthetic process [GO:0009098];plant-type cell wall organization or biogenesis [GO:0071669];valine biosynthetic process [GO:0009099]	chloroplast [GO:0009507]	branched-chain-amino-acid transaminase activity [GO:0004084];L-isoleucine transaminase activity [GO:0052656];L-leucine transaminase activity [GO:0052654];L-valine transaminase activity [GO:0052655]	+	22	22	22	54.6	54.6	54.6	42.59	0	221.56	6530900000	75	0	3281100	0	5773000	0	0	0	6009200	1548000000	1341500000	1734900000	1557200000	151760000	0	13118000	6985900	27500000	0	22336000	39094000	24790000	0
+	3.5922	2.11909	4.34421	P55737	P55737	1908	HSP90-2	Heat shock protein 90-2	Color2 [DarkGray]	1	4		cellular response to heat [GO:0034605];chaperone-mediated protein folding [GO:0061077];defense response to bacterium, incompatible interaction [GO:0009816];protein folding [GO:0006457];protein stabilization [GO:0050821]	cell surface [GO:0009986];cytoplasm [GO:0005737];cytosol [GO:0005829];perinuclear region of cytoplasm [GO:0048471];plasma membrane [GO:0005886];protein-containing complex [GO:0032991]	ATP binding [GO:0005524];ATPase activity [GO:0016887];unfolded protein binding [GO:0051082]	+	132	132	9	82.8	82.8	11	80.063	0	323.31	1255900000000	3504	117080000000	123730000000	101060000000	99009000000	129440000000	132320000000	126900000000	128140000000	20323000000	18688000000	23384000000	20627000000	13361000000	15217000000	15474000000	15296000000	18331000000	13085000000	19633000000	19446000000	21972000000	20370000000
+	2.36322	2.11786	4.34049	Q9FIK7	Q9FIK7	4024	At5g47720	Probable acetyl-CoA acetyltransferase, cytosolic 2	Color2 [DarkGray]	1	4		fatty acid beta-oxidation [GO:0006635]	cytoplasm [GO:0005737]	acetyl-CoA C-acetyltransferase activity [GO:0003985];acetyl-CoA C-acyltransferase activity [GO:0003988];metal ion binding [GO:0046872]	+	17	15	15	45.8	41.4	41.4	43.291	0	163.57	5676700000	150	410000000	706030000	486440000	497040000	594770000	588750000	649610000	535390000	149750000	92439000	194220000	239560000	33482000	33969000	46261000	25617000	23247000	18025000	31653000	87534000	87283000	59190000
+	6.21974	2.11471	4.33103	Q9M0X9	Q9M0X9	4960	4CLL7	4-coumarate--CoA ligase-like 7	Color2 [DarkGray]	1	4		jasmonic acid biosynthetic process [GO:0009695];oxylipin biosynthetic process [GO:0031408]	peroxisome [GO:0005777]	ATP binding [GO:0005524];CoA-ligase activity [GO:0016405];fatty-acyl-CoA synthase activity [GO:0004321]	+	41	40	40	58.5	57.4	57.4	59.849	0	323.31	34762000000	470	1810600000	1621000000	1442700000	1284600000	2000100000	1976000000	1683800000	1885800000	1886600000	1648400000	2063900000	1949100000	965740000	1006400000	982860000	1033100000	1265600000	883020000	1159800000	1202100000	1390200000	1157100000
+	4.35467	2.11197	4.3228	B9DGD6	B9DGD6	444	ACS	Acetyl-coenzyme A synthetase, chloroplastic/glyoxysomal	Color2 [DarkGray]	1	4		acetate metabolic process [GO:0006083];acetyl-CoA biosynthetic process from acetate [GO:0019427];fatty acid metabolic process [GO:0006631]	chloroplast [GO:0009507];chloroplast stroma [GO:0009570];cytosol [GO:0005829];glyoxysome [GO:0009514]	acetate-CoA ligase activity [GO:0003987];AMP binding [GO:0016208];ATP binding [GO:0005524]	+	59	59	59	64.9	64.9	64.9	81.888	0	323.31	150960000000	890	6296200000	7539800000	5082400000	5676800000	6722900000	7315800000	7565900000	6962300000	6982200000	6771400000	7447700000	6843400000	5339100000	5878500000	5919300000	5919700000	6143500000	4074500000	5650300000	5907300000	5863700000	6004700000
+	2.42112	2.11065	4.31886	Q9SEU6	Q9SEU6	5276	At3g15360	Thioredoxin M4, chloroplastic	Color2 [DarkGray]	1	4		cell redox homeostasis [GO:0045454];glycerol ether metabolic process [GO:0006662];negative regulation of catalytic activity [GO:0043086];positive regulation of catalytic activity [GO:0043085];regulation of carbohydrate metabolic process [GO:0006109]	cell wall [GO:0005618];chloroplast [GO:0009507];chloroplast envelope [GO:0009941];chloroplast stroma [GO:0009570];chloroplast thylakoid membrane [GO:0009535];cytoplasm [GO:0005737];cytosol [GO:0005829];thylakoid [GO:0009579]	enzyme activator activity [GO:0008047];enzyme inhibitor activity [GO:0004857];oxidoreductase activity, acting on a sulfur group of donors, disulfide as acceptor [GO:0016671];protein disulfide oxidoreductase activity [GO:0015035];protein domain specific binding [GO:0019904];protein-disulfide reductase activity [GO:0047134]	+	15	15	15	33.7	33.7	33.7	21.172	0	196.44	87082000000	375	29640000	19792000	7373500	11907000	25906000	45645000	43894000	70566000	7770000000	7459900000	6993800000	5839800000	3676000000	4457500000	4572100000	4925200000	5789300000	3228500000	5306500000	4905100000	5943300000	5279000000
+	2.11848	2.10725	4.30869	O81852	O81852	1544	AKHSDH2	Bifunctional aspartokinase/homoserine dehydrogenase 2, chloroplastic	Color2 [DarkGray]	1	4		aspartate family amino acid biosynthetic process [GO:0009067];homoserine biosynthetic process [GO:0009090];lysine biosynthetic process via diaminopimelate [GO:0009089];methionine biosynthetic process [GO:0009086];threonine biosynthetic process [GO:0009088]	chloroplast [GO:0009507];chloroplast stroma [GO:0009570]	aspartate kinase activity [GO:0004072];ATP binding [GO:0005524];homoserine dehydrogenase activity [GO:0004412];NADP binding [GO:0050661]	+	51	41	41	54	43.9	43.9	100.25	0	150.42	15502000000	267	1435700000	972420000	787230000	895840000	1703500000	1517100000	1227500000	1317400000	416300000	403910000	402660000	482280000	237150000	207300000	335440000	533550000	351760000	263470000	327640000	264670000	400090000	302310000
+	2.16673	2.10399	4.29897	A0A1P8BB43	A0A1P8BB43	285	MDJ22.4	Phosphoglycerate/bisphosphoglycerate mutase family protein	Color2 [DarkGray]	1	4				catalytic activity [GO:0003824]	+	28	28	28	58.6	58.6	58.6	52.147	0	296.3	24455000000	293	36396000	35508000	31141000	42652000	65915000	36846000	45597000	21752000	1779100000	1501700000	1811200000	1853500000	1105700000	1303700000	1275400000	1627200000	1263800000	912030000	1263200000	1514500000	1807200000	1734100000
+	4.78074	2.1031	4.29631	Q94F46	Q94F46	3545	At1g13990	AT4g27310/M4I22_120	Color2 [DarkGray]	1	4					+	6	6	6	23.8	23.8	23.8	30.889	0	22.946	372040000	13	0	0	0	0	0	0	0	0	75135000	106640000	94367000	90741000	5159100	0	0	0	0	0	0	0	0	0
+	3.98301	2.10059	4.28886	O04904	O04904	1119	PYR4	Dihydroorotase, mitochondrial	Color2 [DarkGray]	1	4		'de novo' pyrimidine nucleobase biosynthetic process [GO:0006207];'de novo' UMP biosynthetic process [GO:0044205];pyrimidine nucleotide biosynthetic process [GO:0006221]	chloroplast [GO:0009507];cytoplasm [GO:0005737];cytosol [GO:0005829];mitochondrion [GO:0005739]	dihydroorotase activity [GO:0004151];metal ion binding [GO:0046872]	+	24	24	24	72.4	72.4	72.4	41.949	0	206.8	27507000000	300	1113500000	1176100000	973130000	899090000	931920000	884810000	800120000	842510000	1514300000	1716500000	1637700000	1616600000	387500000	563650000	706160000	601140000	1176600000	386490000	1316900000	1578400000	1353900000	1488300000
+	3.71575	2.10048	4.28852	Q6NL24	Q6NL24	2447	ECHIA	Probable enoyl-CoA hydratase 1, peroxisomal	Color2 [DarkGray]	1	4		fatty acid beta-oxidation [GO:0006635]	peroxisome [GO:0005777]	enoyl-CoA hydratase activity [GO:0004300]	+	22	22	22	63.4	63.4	63.4	28.818	0	74.279	5995900000	133	54696000	41309000	49307000	105030000	103710000	271400000	158260000	112610000	572050000	531390000	636440000	589960000	171250000	223240000	220630000	246750000	218590000	160290000	219740000	308240000	242870000	219000000
+	6.06012	2.1003	4.28799	Q9SLA8	Q9SLA8	5465	MOD1	Enoyl-[acyl-carrier-protein] reductase [NADH], chloroplastic	Color2 [DarkGray]	1	4		fatty acid biosynthetic process [GO:0006633]	chloroplast [GO:0009507];chloroplast envelope [GO:0009941];chloroplast stroma [GO:0009570];fatty acid synthase complex [GO:0005835];mitochondrion [GO:0005739];thylakoid [GO:0009579]	copper ion binding [GO:0005507];enoyl-[acyl-carrier-protein] reductase (NADH) activity [GO:0004318];enoyl-[acyl-carrier-protein] reductase activity [GO:0016631]	+	30	30	30	59.5	59.5	59.5	41.213	0	323.31	112220000000	703	3305200000	3842800000	3271100000	2957300000	4772900000	4780900000	4224900000	4668400000	7602800000	7553400000	9289400000	8932800000	2701700000	3058900000	3628500000	2938200000	4358000000	2853100000	4099500000	4471600000	4318200000	5481700000
+	4.34637	2.09896	4.284	Q8LF20	Q8LF20	2922	At2g25430	Putative clathrin assembly protein At2g25430	Color2 [DarkGray]	1	4		clathrin coat assembly [GO:0048268];clathrin-dependent endocytosis [GO:0072583];endocytosis [GO:0006897];vesicle budding from membrane [GO:0006900]	clathrin-coated pit [GO:0005905];clathrin-coated vesicle [GO:0030136];Golgi apparatus [GO:0005794];nucleus [GO:0005634];plasma membrane [GO:0005886];vacuole [GO:0005773]	1-phosphatidylinositol binding [GO:0005545];clathrin heavy chain binding [GO:0032050];phosphatidylinositol-4,5-bisphosphate binding [GO:0005546];SNARE binding [GO:0000149]	+	33	33	22	59.3	59.3	48.2	72.083	0	110.23	10479000000	158	1302000000	1211200000	919330000	1099700000	1392500000	1459400000	1189300000	1136200000	58712000	52387000	85106000	78674000	22372000	44054000	39611000	85232000	22190000	12916000	30121000	25158000	42759000	48118000
+	1.86001	2.09755	4.27982	C0Z2J1	C0Z2J1	465	At1g11360	AT1G11360 protein	Color2 [DarkGray]	1	4			cytosol [GO:0005829];extracellular region [GO:0005576];plasma membrane [GO:0005886]	hydrolase activity [GO:0016787]	+	10	10	10	41.3	41.3	41.3	26.508	0	38.334	5358500000	85	147920000	179470000	117890000	187210000	285210000	298470000	347030000	320440000	309120000	338350000	329810000	267750000	119520000	165830000	186370000	192590000	176260000	87768000	209050000	122030000	232180000	201430000
+	3.07801	2.09674	4.27742	O04905	O04905	1120	UMK3	UMP-CMP kinase 3	Color2 [DarkGray]	1	4		CDP biosynthetic process [GO:0046705];'de novo' pyrimidine nucleobase biosynthetic process [GO:0006207];purine nucleotide metabolic process [GO:0006163];pyrimidine nucleotide biosynthetic process [GO:0006221];pyrimidine ribonucleoside monophosphate metabolic process [GO:0009173];UDP biosynthetic process [GO:0006225]	cytoplasm [GO:0005737];cytosol [GO:0005829];nucleus [GO:0005634];plastid [GO:0009536]	ATP binding [GO:0005524];cytidylate kinase activity [GO:0004127];UMP kinase activity [GO:0033862];uridylate kinase activity [GO:0009041]	+	25	25	24	87.1	87.1	87.1	22.481	0	129.22	21983000000	243	1519800000	1729300000	1321800000	1269900000	2403700000	2280700000	2502800000	2462000000	556600000	570390000	752700000	627420000	277180000	274350000	369610000	265760000	443450000	248130000	422950000	387120000	309480000	378360000
+	2.35831	2.09418	4.26985	Q9LFB5	Q9LFB5	4411	At5g01210	AT5g01210/F7J8_190	Color2 [DarkGray]	1	4				transferase activity, transferring acyl groups other than amino-acyl groups [GO:0016747]	+	15	15	15	33.9	33.9	33.9	52.331	0	28.508	2966000000	85	250920000	198800000	164460000	179270000	278410000	284780000	211810000	306730000	191170000	169950000	149250000	122480000	25062000	30956000	33570000	21852000	55762000	31693000	30966000	41264000	41027000	46345000
+	5.03119	2.08822	4.25222	Q8L5A7	Q8L5A7	2766	SOT15	Cytosolic sulfotransferase 15	Color2 [DarkGray]	1	4		jasmonic acid metabolic process [GO:0009694];response to jasmonic acid [GO:0009753]	cytoplasm [GO:0005737]	hydroxyjasmonate sulfotransferase activity [GO:0080131]	+	17	16	15	47.4	45.4	45.4	41.364	0	63.819	1976500000	34	7345400	15235000	12856000	10190000	0	21854000	21007000	6574100	389470000	412120000	533600000	538840000	0	0	0	0	0	7450300	0	0	0	0
+	6.02114	2.08617	4.24619	Q9FZ25	Q9FZ25	4335	At1g02360	At1g02360	Color2 [DarkGray]	1	4		carbohydrate metabolic process [GO:0005975];cell wall macromolecule catabolic process [GO:0016998];cellular response to hypoxia [GO:0071456];chitin catabolic process [GO:0006032];response to oomycetes [GO:0002239]		chitinase activity [GO:0004568]	+	10	10	10	47.1	47.1	47.1	30.137	0	234.26	6105700000	108	318210000	316880000	239180000	304320000	532000000	657870000	518110000	416730000	208110000	182450000	216380000	157960000	164870000	130730000	191500000	287510000	123580000	78325000	107200000	126060000	219000000	200600000
+	4.09238	2.08569	4.24477	Q9FZ47	Q9FZ47	4337	ACR11	ACT domain-containing protein ACR11	Color2 [DarkGray]	1	4		response to cold [GO:0009409];response to light stimulus [GO:0009416];response to sucrose [GO:0009744]	chloroplast [GO:0009507];chloroplast envelope [GO:0009941];chloroplast stroma [GO:0009570];chloroplast thylakoid membrane [GO:0009535];nucleus [GO:0005634];stromule [GO:0010319]		+	21	21	21	55.5	55.5	55.5	31.294	0	323.31	108050000000	441	22388000	77968000	42766000	44421000	141810000	207360000	170240000	140160000	7662100000	9014700000	10066000000	9273300000	3852600000	4972800000	5255500000	5194200000	5556600000	4123100000	5833600000	5926800000	7790400000	7175500000
+	3.4976	2.08209	4.23421	Q9M5K2	Q9M5K2	5052	LPD2	Dihydrolipoyl dehydrogenase 2, mitochondrial	Color2 [DarkGray]	1	4		cell redox homeostasis [GO:0045454];oxidation-reduction process [GO:0055114];response to cadmium ion [GO:0046686]	cytosol [GO:0005829];mitochondrial matrix [GO:0005759];mitochondrial respiratory chain complex I [GO:0005747];mitochondrion [GO:0005739];oxoglutarate dehydrogenase complex [GO:0045252]	ATP binding [GO:0005524];cobalt ion binding [GO:0050897];copper ion binding [GO:0005507];dihydrolipoyl dehydrogenase activity [GO:0004148];flavin adenine dinucleotide binding [GO:0050660];zinc ion binding [GO:0008270]	+	78	54	54	83.4	76.7	76.7	53.985	0	323.31	163880000000	1022	9939400000	11364000000	8747800000	7020200000	10367000000	11844000000	9521300000	10606000000	5801400000	5298100000	6268600000	5349500000	3755300000	5134900000	4643600000	4804500000	4542300000	3423900000	4466700000	5331900000	7068600000	6519900000
+	3.5131	2.08139	4.23215	Q9FZA2	Q9FZA2	4343	AGP31	Non-classical arabinogalactan protein 31	Color2 [DarkGray]	1	4		response to jasmonic acid [GO:0009753]	cell periphery [GO:0071944];extracellular region [GO:0005576];plant-type cell wall [GO:0009505];plasma membrane [GO:0005886];plasmodesma [GO:0009506]		+	15	15	15	32	32	32	38.488	0	39.052	9425200000	163	353330000	256870000	170120000	216690000	586150000	650840000	638770000	596990000	451250000	447770000	434290000	406560000	240670000	310930000	257970000	360220000	271190000	238680000	400320000	302940000	561620000	515120000
+	2.59196	2.08069	4.2301	Q9M876	Q9M876	5059	EMB2768	Tyrosine--tRNA ligase, chloroplastic/mitochondrial	Color2 [DarkGray]	1	4		embryo development ending in seed dormancy [GO:0009793];tRNA aminoacylation [GO:0043039];tyrosyl-tRNA aminoacylation [GO:0006437]	chloroplast [GO:0009507];chloroplast stroma [GO:0009570];cytosol [GO:0005829];mitochondrion [GO:0005739]	ATP binding [GO:0005524];RNA binding [GO:0003723];tyrosine-tRNA ligase activity [GO:0004831]	+	36	36	36	67.9	67.9	67.9	56.618	0	272.1	18074000000	296	146460000	174890000	135670000	97239000	253470000	314170000	160630000	217830000	1231300000	1243000000	1259300000	1327700000	781230000	870920000	993440000	724350000	919940000	625950000	846510000	1205700000	1418300000	1188600000
+	3.66676	2.07763	4.22114	O81644	O81644	1537	VLN2	Villin-2	Color2 [DarkGray]	1	4		actin filament bundle assembly [GO:0051017];actin filament capping [GO:0051693];actin filament severing [GO:0051014];actin polymerization or depolymerization [GO:0008154]	actin cytoskeleton [GO:0015629];cytoplasm [GO:0005737];cytosol [GO:0005829]	actin filament binding [GO:0051015]	+	100	100	84	80.7	80.7	72.2	107.84	0	323.31	182370000000	1550	9583500000	10853000000	8688400000	8181300000	12948000000	13263000000	12165000000	13016000000	7067300000	6128100000	7347500000	6888500000	4378700000	4994200000	5372300000	5291600000	5214500000	3580600000	5383000000	5982300000	6928800000	6214900000
+	2.19858	2.07671	4.21845	O64517	O64517	1352	AMC4	Metacaspase-4	Color2 [DarkGray]	1	4		defense response [GO:0006952];positive regulation of programmed cell death [GO:0043068];protein autoprocessing [GO:0016540]	cytoplasm [GO:0005737];cytosol [GO:0005829];mitochondrion [GO:0005739];plasma membrane [GO:0005886];plasmodesma [GO:0009506]	cysteine-type endopeptidase activity [GO:0004197];cysteine-type peptidase activity [GO:0008234];identical protein binding [GO:0042802]	+	46	46	46	79.7	79.7	79.7	45.483	0	323.31	60270000000	508	4563500000	5528000000	4285000000	4466600000	7414400000	7056400000	7125700000	7144100000	746840000	746140000	837420000	630290000	609120000	628770000	522900000	584680000	1685400000	975180000	1354800000	1200100000	649580000	401480000
+	4.74734	2.07466	4.21244	Q9C5C2	Q9C5C2	3661	TGG2	Myrosinase 2	Color2 [DarkGray]	1	4		abscisic acid-activated signaling pathway [GO:0009738];carbohydrate metabolic process [GO:0005975];defense response to insect [GO:0002213];glucosinolate catabolic process [GO:0019762];regulation of stomatal movement [GO:0010119];response to abscisic acid [GO:0009737]	apoplast [GO:0048046];chloroplast [GO:0009507];cytosolic ribosome [GO:0022626];peroxisome [GO:0005777];plasmodesma [GO:0009506];plastid [GO:0009536];secretory vesicle [GO:0099503];vacuole [GO:0005773]	beta-glucosidase activity [GO:0008422];glucosinolate glucohydrolase activity [GO:0102799];thioglucosidase activity [GO:0019137]	+	62	62	56	75.5	75.5	73.1	62.731	0	323.31	1717300000000	2659	491750000	534500000	671760000	515150000	945100000	755120000	707510000	616410000	121940000000	110510000000	129420000000	122680000000	91366000000	104040000000	110470000000	103070000000	77145000000	65836000000	78971000000	83124000000	128770000000	127190000000
+	3.31983	2.07279	4.20699	Q9C5D0	Q9C5D0	3666	CBSX2	CBS domain-containing protein CBSX2, chloroplastic	Color2 [DarkGray]	1	4		cell redox homeostasis [GO:0045454]	chloroplast [GO:0009507];chloroplast stroma [GO:0009570];plasma membrane [GO:0005886]		+	12	11	10	39.5	39.5	36.6	25.955	0	95.815	5349300000	88	4668500	0	0	0	161790000	0	147160000	146270000	544490000	477590000	497940000	503480000	207360000	259930000	286090000	168100000	259210000	194590000	321160000	185250000	274070000	226740000
+	3.79659	2.0726	4.20643	A0A1I9LNZ1	A0A1I9LNZ1	40	At3g07470	Uncharacterized protein	Color2 [DarkGray]	1	4					+	8	8	7	34.4	34.4	27.4	17.386	0	62.724	14111000000	165	229630000	285350000	196660000	173540000	198310000	218870000	223270000	159110000	918890000	897770000	1096100000	667790000	442150000	574660000	710830000	591940000	667830000	553340000	603620000	716650000	1027300000	1055400000
+	3.04692	2.07027	4.19964	Q9C8X4	Q9C8X4	3780	At1g36390	GrpE protein homolog	Color2 [DarkGray]	1	4		protein folding [GO:0006457];response to heat [GO:0009408]	chloroplast [GO:0009507];chloroplast envelope [GO:0009941];chloroplast stroma [GO:0009570];mitochondrial matrix [GO:0005759]	adenyl-nucleotide exchange factor activity [GO:0000774];chaperone binding [GO:0051087];copper ion binding [GO:0005507];protein heterodimerization activity [GO:0046982];protein homodimerization activity [GO:0042803];unfolded protein binding [GO:0051082]	+	9	9	9	24	24	24	31.223	0	18.986	2779500000	56	0	49570000	44799000	0	0	0	0	0	363120000	223880000	406890000	417370000	60911000	92258000	113220000	96248000	120200000	48202000	163900000	112620000	112380000	153060000
+	1.96662	2.07007	4.19908	Q9M1X8	Q9M1X8	4993	F24G16.250	Nucleic acid-binding, OB-fold-like protein	Color2 [DarkGray]	1	4			chloroplast [GO:0009507];cytosol [GO:0005829]	tRNA binding [GO:0000049]	+	21	21	21	61.5	61.5	61.5	29.745	0	323.31	26594000000	279	17685000	47278000	4099400	68332000	30026000	56052000	54120000	8818200	2485800000	2126500000	2525900000	1966700000	1058400000	1092600000	1210000000	1251000000	1556200000	1116200000	1626700000	1660800000	1772900000	1422200000
+	4.31678	2.06992	4.19865	F4J9A0	F4J9A0	807	NodGS	Nodulin/glutamine synthase-like protein	Color2 [DarkGray]	1	4		glutamine biosynthetic process [GO:0006542];lateral root formation [GO:0010311];polyamine catabolic process [GO:0006598];response to abscisic acid [GO:0009737];response to bacterium [GO:0009617];root cap development [GO:0048829]	cytosol [GO:0005829]	gamma-tubulin binding [GO:0043015];hydrolase activity [GO:0016787];protein self-association [GO:0043621];transcription factor binding [GO:0008134]	+	53	53	53	54.7	54.7	54.7	94.384	0	323.31	32449000000	434	2831800000	2785100000	2178900000	2518800000	4265200000	3969800000	3561300000	3749800000	536810000	561340000	531950000	436590000	389790000	520370000	428830000	373350000	217660000	258520000	215290000	203000000	495720000	449360000
+	4.18493	2.06906	4.19612	Q06588	Q06588	2027	ACO4	1-aminocyclopropane-1-carboxylate oxidase 4	Color2 [DarkGray]	1	4		cellular response to fatty acid [GO:0071398];defense response [GO:0006952];ethylene biosynthetic process [GO:0009693];fruit ripening [GO:0009835];response to fungus [GO:0009620]	cytosol [GO:0005829];extracellular region [GO:0005576]	1-aminocyclopropane-1-carboxylate oxidase activity [GO:0009815];dioxygenase activity [GO:0051213];L-ascorbic acid binding [GO:0031418];metal ion binding [GO:0046872]	+	30	30	28	86.4	86.4	83	36.676	0	189	45528000000	422	698270000	750610000	716430000	662100000	1019000000	1032500000	899980000	2400400000	2929300000	2776100000	3240100000	2841900000	1661300000	2121200000	2495400000	2553300000	1880000000	1327600000	1911100000	2028500000	2720200000	2070900000
+	2.35622	2.06864	4.19492	O64730	O64730	1365	At2g30170	Probable protein phosphatase 2C 26	Color2 [DarkGray]	1	4		cellular response to light stimulus [GO:0071482];peptidyl-threonine dephosphorylation [GO:0035970];thylakoid membrane organization [GO:0010027]	chloroplast [GO:0009507];chloroplast stroma [GO:0009570]	metal ion binding [GO:0046872];phosphoprotein phosphatase activity [GO:0004721]	+	8	8	8	28.2	28.2	28.2	32.284	0	51.298	5267800000	74	0	0	0	0	11093000	6670300	0	8098800	363480000	365960000	389390000	289900000	284400000	310310000	320430000	336550000	281310000	124580000	262970000	158820000	316460000	462730000
+	3.86234	2.06751	4.19163	F4IQ05	F4IQ05	713	At2g37130	Peroxidase	Color2 [DarkGray]	1	4		hydrogen peroxide catabolic process [GO:0042744];response to oxidative stress [GO:0006979]	extracellular region [GO:0005576]	heme binding [GO:0020037];metal ion binding [GO:0046872];peroxidase activity [GO:0004601]	+	20	20	20	62.8	62.8	62.8	33.272	0	139.72	9781200000	133	251760000	250600000	182860000	202280000	1228400000	1281200000	1314900000	1368400000	415830000	478420000	504080000	439180000	122880000	140620000	116500000	135370000	188440000	93535000	202840000	227740000	250110000	113300000
+	1.78005	2.06734	4.19114	P24101	P24101	1668	PER33	Peroxidase 33	Color2 [DarkGray]	1	4		defense response [GO:0006952];defense response to bacterium [GO:0042742];defense response to fungus [GO:0050832];hydrogen peroxide catabolic process [GO:0042744];pattern recognition receptor signaling pathway [GO:0002221];reactive oxygen species metabolic process [GO:0072593];response to light stimulus [GO:0009416];response to oxidative stress [GO:0006979];unidimensional cell growth [GO:0009826]	cytosol [GO:0005829];extracellular region [GO:0005576];plant-type cell wall [GO:0009505];secretory vesicle [GO:0099503];vacuole [GO:0005773]	heme binding [GO:0020037];metal ion binding [GO:0046872];peroxidase activity [GO:0004601]	+	12	4	4	44.1	13.8	13.8	38.941	0	8.723	1434900000	12	0	0	0	0	130000000	0	0	128690000	96511000	206820000	45566000	202790000	38166000	59269000	47778000	50659000	81232000	19356000	56813000	6801100	112640000	20014000
+	4.21376	2.06552	4.18586	Q944J2	Q944J2	3416	At4g28706	At4g29227	Color2 [DarkGray]	1	4				kinase activity [GO:0016301];phosphotransferase activity, alcohol group as acceptor [GO:0016773]	+	27	27	2	62.8	62.8	5	43.079	0	323.31	32284000000	384	504470000	119450000	77738000	67645000	175480000	143240000	527060000	121790000	2397200000	2130300000	2612800000	2087700000	1309800000	1689900000	1684200000	1580300000	1728500000	1206000000	1430500000	1436500000	2418900000	2300900000
+	2.82117	2.06474	4.1836	Q9SJI7	Q9SJI7	5406	At2g42690	Phospholipase A1-IIdelta	Color2 [DarkGray]	1	4		cellular response to UV-B [GO:0071493];lipid catabolic process [GO:0016042];UV protection [GO:0009650]	cytoplasm [GO:0005737];cytosol [GO:0005829]	phospholipase A1 activity [GO:0008970]	+	13	13	13	33.7	33.7	33.7	46.056	0	54.29	2802500000	78	17371000	26218000	18546000	0	40219000	55302000	36851000	46569000	121680000	157960000	343630000	290280000	101990000	59787000	75610000	101930000	94752000	103210000	91399000	194980000	120710000	192180000
+	2.2023	2.06432	4.18236	Q8L9J9	Q8L9J9	2840	At4g34215	Probable carbohydrate esterase At4g34215	Color2 [DarkGray]	1	4			cytosol [GO:0005829]	hydrolase activity [GO:0016787]	+	5	5	5	31.2	31.2	31.2	28.358	0	15.534	2804800000	51	108530000	155890000	136240000	155750000	174220000	152290000	104850000	172450000	113610000	186860000	140600000	106140000	66950000	66518000	82836000	79115000	45673000	39071000	131470000	96746000	119520000	115900000
+	2.75909	2.06313	4.17892	O80480	O80480	1442	IMPA4	Importin subunit alpha-4	Color2 [DarkGray]	1	4		host response to induction by symbiont of tumor, nodule or growth in host [GO:0080034];NLS-bearing protein import into nucleus [GO:0006607];symbiont intracellular protein transport in host [GO:0030581]	cytosol [GO:0005829];host cell nucleus [GO:0042025];nuclear envelope [GO:0005635];nucleus [GO:0005634]	nuclear import signal receptor activity [GO:0061608];nuclear localization sequence binding [GO:0008139]	+	34	29	25	66.7	60.8	58.7	59.445	0	323.31	23627000000	288	1306100000	2010300000	1536700000	1684000000	2681900000	2762500000	2498600000	2321000000	627520000	508230000	740090000	613020000	258980000	294330000	320630000	314950000	358940000	215630000	305950000	402030000	530960000	423500000
+	6.1755	2.06277	4.17787	Q56WD9	Q56WD9	2339	PED1	3-ketoacyl-CoA thiolase 2, peroxisomal	Color2 [DarkGray]	1	4		fatty acid beta-oxidation [GO:0006635];glyoxysome organization [GO:0010111];jasmonic acid biosynthetic process [GO:0009695];oxylipin biosynthetic process [GO:0031408];phenylacetate catabolic process [GO:0010124];positive regulation of abscisic acid-activated signaling pathway [GO:0009789];response to wounding [GO:0009611]	endoplasmic reticulum [GO:0005783];glyoxysome [GO:0009514];mitochondrion [GO:0005739];nucleolus [GO:0005730];peroxisome [GO:0005777];vacuolar membrane [GO:0005774]	acetyl-CoA C-acyltransferase activity [GO:0003988]	+	51	51	46	81.2	81.2	74.9	48.578	0	323.31	356190000000	1447	8776200000	9861800000	8247500000	7626000000	11364000000	12309000000	11648000000	13017000000	34516000000	34597000000	38807000000	36342000000	6204300000	8378900000	10888000000	10533000000	12441000000	6613800000	13693000000	12481000000	12371000000	11542000000
+	6.03169	2.0616	4.17448	Q94A08	Q94A08	3451	RFS2	Probable galactinol--sucrose galactosyltransferase 2	Color2 [DarkGray]	1	4		raffinose catabolic process [GO:0034484];response to karrikin [GO:0080167];response to oxidative stress [GO:0006979]	plasmodesma [GO:0009506]	raffinose alpha-galactosidase activity [GO:0052692];transferase activity, transferring glycosyl groups [GO:0016757]	+	44	41	39	64.2	62.4	61.4	85.142	0	323.31	18225000000	287	1475900000	1488500000	1298700000	1264100000	2131200000	1946900000	2007300000	1950300000	1120800000	1182400000	1167400000	1080500000	0	0	28521000	10814000	11850000	0	12432000	14449000	12052000	11814000
+	2.56532	2.06156	4.17437	Q5XEP2	Q5XEP2	2381	HOP2	Hsp70-Hsp90 organizing protein 2	Color2 [DarkGray]	1	4		chaperone-mediated protein complex assembly [GO:0051131];response to cadmium ion [GO:0046686]	cytosol [GO:0005829];nucleus [GO:0005634];plasma membrane [GO:0005886]	Hsp90 protein binding [GO:0051879];preprotein binding [GO:0070678]	+	62	62	48	82.8	82.8	72.5	64.519	0	323.31	48585000000	695	1369500000	1857600000	1196900000	1616300000	2437800000	3033300000	2559200000	2745800000	2969000000	2980900000	3209000000	2989800000	1506100000	1985500000	1145600000	2229500000	1291500000	827290000	1595500000	1622400000	1621400000	1546900000
+	4.24832	2.06125	4.17347	P55228	P55228	1904	APS1	Glucose-1-phosphate adenylyltransferase small subunit, chloroplastic	Color2 [DarkGray]	1	4		glycogen biosynthetic process [GO:0005978];photoperiodism, flowering [GO:0048573];starch biosynthetic process [GO:0019252]	apoplast [GO:0048046];chloroplast [GO:0009507];chloroplast stroma [GO:0009570];heterotetrameric ADPG pyrophosphorylase complex [GO:0030931];plastid [GO:0009536]	ATP binding [GO:0005524];glucose-1-phosphate adenylyltransferase activity [GO:0008878]	+	57	57	57	70.4	70.4	70.4	56.65	0	323.31	424820000000	1322	714790000	689790000	573380000	562220000	724480000	1203100000	906470000	925040000	27826000000	25813000000	31942000000	29458000000	21226000000	24509000000	25876000000	25850000000	22454000000	15428000000	22977000000	23839000000	31711000000	30648000000
+	2.30145	2.06103	4.17284	Q8VZF3	Q8VZF3	3181	GEP	Probable glutamyl endopeptidase, chloroplastic	Color2 [DarkGray]	1	4			chloroplast [GO:0009507];chloroplast stroma [GO:0009570];cytosol [GO:0005829]	serine-type endopeptidase activity [GO:0004252]	+	86	86	86	64.2	64.2	64.2	106.1	0	323.31	227640000000	1690	4455800000	4381100000	3235500000	3338200000	4401200000	3920400000	3728000000	4424800000	15405000000	12436000000	14705000000	12352000000	9233000000	11056000000	11236000000	10772000000	12186000000	7697700000	12515000000	11718000000	14920000000	12788000000
+	1.59992	2.05992	4.16962	F4K5Y6	F4K5Y6	1010	MNL12.14	COP1-interacting protein-like protein	Color2 [DarkGray]	1	4					+	2	2	2	2.1	2.1	2.1	128.83	0.0064251	1.6469	392080000	12	5257900	6400100	5843800	5566600	7333200	5311300	7016800	7257700	32332000	37028000	51557000	44325000	18762000	12221000	19190000	12942000	0	0	0	27596000	23893000	17329000
+	3.52646	2.05785	4.16366	Q9FJY6	Q9FJY6	4065	At5g66530	Glucose-6-phosphate 1-epimerase	Color2 [DarkGray]	1	4		carbohydrate metabolic process [GO:0005975]	apoplast [GO:0048046];chloroplast [GO:0009507];chloroplast stroma [GO:0009570];cytoplasm [GO:0005737];plastid [GO:0009536]	carbohydrate binding [GO:0030246];glucose-6-phosphate 1-epimerase activity [GO:0047938]	+	31	31	31	87.9	87.9	87.9	33.692	0	323.31	146880000000	790	1106000000	1048600000	851110000	720860000	1081000000	1089800000	982770000	1035200000	10870000000	9219900000	12110000000	11708000000	5915100000	7314200000	7109800000	7196700000	7120700000	6083900000	7752600000	7878600000	9652900000	9204900000
+	2.67445	2.05728	4.16201	Q9SD66	Q9SD66	5253	F13I12.120	Thylakoid soluble phosphoprotein	Color2 [DarkGray]	1	4			chloroplast [GO:0009507];chloroplast envelope [GO:0009941];chloroplast thylakoid [GO:0009534];chloroplast thylakoid membrane [GO:0009535];cytosol [GO:0005829];thylakoid [GO:0009579]		+	4	4	4	37	37	37	10.53	0	9.4722	739550000	28	1287500	1382000	0	0	0	0	0	4153500	76088000	72629000	86427000	71702000	35237000	28888000	42878000	33520000	45683000	20843000	32506000	23521000	40269000	40629000
+	2.05081	2.05477	4.15476	Q1G3L2	Q1G3L2	2109	At4g01883	Polyketide cyclase / dehydrase and lipid transport protein	Color2 [DarkGray]	1	4			chloroplast [GO:0009507]		+	14	14	13	43.3	43.3	43.3	25.288	0	38.159	7070300000	99	0	0	0	0	0	6107100	0	0	525500000	543860000	534050000	351670000	279510000	307860000	367060000	393710000	372200000	192590000	396100000	337420000	677810000	556430000
+	1.88729	2.05165	4.14579	Q9SQR3	Q9SQR3	5521	D14	Strigolactone esterase D14	Color2 [DarkGray]	1	4		cellular response to strigolactone [GO:1902348];secondary shoot formation [GO:0010223];strigolactone biosynthetic process [GO:1901601]	cytoplasm [GO:0005737];nucleus [GO:0005634]	hydrolase activity [GO:0016787]	+	10	10	10	41.2	41.2	41.2	29.624	0	43.762	4644500000	104	362450000	384250000	293430000	313680000	419770000	553900000	424460000	415530000	107320000	60108000	158270000	188430000	38375000	73865000	107990000	72701000	20949000	48989000	55004000	78431000	129510000	115730000
+	2.54386	2.04503	4.12681	Q9T030	Q9T030	5793	PCBER1	Phenylcoumaran benzylic ether reductase 1	Color2 [DarkGray]	1	4		lignan biosynthetic process [GO:0009807];response to cadmium ion [GO:0046686]		oxidoreductase activity, acting on NAD(P)H, oxygen as acceptor [GO:0050664]	+	15	13	13	58.1	54.2	54.2	34.071	0	65.464	5255100000	79	471780000	444390000	319730000	411770000	516610000	441070000	382480000	369110000	155130000	121370000	142990000	172730000	48730000	94685000	98740000	94074000	89996000	42578000	56654000	107270000	153630000	179150000
+	4.17268	2.04453	4.1254	Q9SMP1	Q9SMP1	5482	XTH11	Probable xyloglucan endotransglucosylase/hydrolase protein 11	Color2 [DarkGray]	1	4		cell wall biogenesis [GO:0042546];cell wall organization [GO:0071555];xyloglucan metabolic process [GO:0010411]	apoplast [GO:0048046];cell wall [GO:0005618]	hydrolase activity, hydrolyzing O-glycosyl compounds [GO:0004553];xyloglucan:xyloglucosyl transferase activity [GO:0016762]	+	5	5	3	10.5	10.5	7.2	31.939	0	5.6187	314200000	11	0	0	0	0	0	0	0	0	93197000	43057000	90959000	86985000	0	0	0	0	0	0	0	0	0	0
+	2.88074	2.04063	4.11424	Q9LML2	Q9LML2	4573	SMXL6	Protein SMAX1-LIKE 6	Color2 [DarkGray]	1	4		response to strigolactone [GO:1902347]	nucleus [GO:0005634]		+	6	6	6	7.4	7.4	7.4	107.8	0	3.2935	528920000	5	71479000	31436000	26907000	41861000	0	3594300	0	31704000	30045000	18365000	29668000	21100000	22684000	23556000	19475000	16820000	70383000	0	0	14063000	19753000	20032000
+	2.70219	2.03726	4.10466	Q56YW9	Q56YW9	2356	TUBB2	Tubulin beta-2 chain	Color2 [DarkGray]	1	4		microtubule-based process [GO:0007017]	cytoplasm [GO:0005737];microtubule [GO:0005874]	GTP binding [GO:0005525];GTPase activity [GO:0003924];structural constituent of cytoskeleton [GO:0005200]	+	42	22	8	83.3	54	24	50.733	0	323.31	153080000000	405	19401000000	19554000000	16379000000	16422000000	18744000000	19783000000	20090000000	20418000000	174580000	137300000	202070000	150980000	80337000	165430000	133910000	183810000	27576000	74574000	29073000	11828000	191610000	186870000
+	2.71514	2.03673	4.10316	Q9LRS0	Q9LRS0	4658	GLO2	(S)-2-hydroxy-acid oxidase GLO2	Color2 [DarkGray]	1	4		lactate oxidation [GO:0019516];oxidative photosynthetic carbon pathway [GO:0009854]	peroxisome [GO:0005777]	FMN binding [GO:0010181];glycolate oxidase activity [GO:0008891];L-lactate dehydrogenase activity [GO:0004459];long-chain-(S)-2-hydroxy-long-chain-acid oxidase activity [GO:0052853];medium-chain-(S)-2-hydroxy-acid oxidase activity [GO:0052854];very-long-chain-(S)-2-hydroxy-acid oxidase activity [GO:0052852]	+	59	27	27	95.9	60.8	60.8	40.306	0	323.31	185090000000	594	150800000	161930000	123630000	144200000	224490000	238550000	173250000	247890000	12404000000	12677000000	15746000000	15341000000	10452000000	10076000000	11681000000	11562000000	7023700000	6831300000	7754300000	7961600000	13605000000	14044000000
+	4.0637	2.03564	4.10003	Q9LK36	Q9LK36	4529	SAHH2	Adenosylhomocysteinase 2	Color2 [DarkGray]	1	4		one-carbon metabolic process [GO:0006730];S-adenosylmethionine cycle [GO:0033353]	cytosol [GO:0005829];plasma membrane [GO:0005886];vacuole [GO:0005773]	adenosylhomocysteinase activity [GO:0004013]	+	62	23	23	76.5	29.1	29.1	53.159	0	323.31	39067000000	361	2893800000	2892600000	2542600000	2140800000	2076000000	2428400000	2046500000	2141100000	1404500000	1298700000	1543100000	1392100000	956210000	1094400000	1171900000	1126900000	1105600000	658080000	979910000	1054200000	1734100000	1443300000
+	2.41962	2.03512	4.09858	Q9T0G1	Q9T0G1	5805	At4g10030	Alpha/beta-Hydrolases superfamily protein	Color2 [DarkGray]	1	4		lipid biosynthetic process [GO:0008610];response to cold [GO:0009409]		phospholipase activity [GO:0004620]	+	11	11	11	35.3	35.3	35.3	42.147	0	21.623	1271300000	21	0	0	0	0	0	0	0	0	174260000	168980000	178260000	181820000	50129000	76085000	61051000	40543000	51074000	27527000	45256000	37725000	56628000	22675000
+	3.46286	2.03297	4.09248	Q9M336	Q9M336	5033	UPP	Uracil phosphoribosyltransferase, chloroplastic	Color2 [DarkGray]	1	4		cellular response to phosphate starvation [GO:0016036];developmental process [GO:0032502];nucleoside metabolic process [GO:0009116];UMP salvage [GO:0044206];uracil salvage [GO:0006223]	chloroplast [GO:0009507];chloroplast stroma [GO:0009570];cytosol [GO:0005829];plastid [GO:0009536]	GTP binding [GO:0005525];kinase activity [GO:0016301];uracil phosphoribosyltransferase activity [GO:0004845]	+	24	24	24	65.2	65.2	65.2	32.195	0	180.34	27666000000	288	333030000	277300000	230660000	284560000	265360000	385740000	356650000	375420000	2178200000	2089100000	2461300000	2242400000	942900000	1018300000	1029200000	1159300000	1146100000	761380000	1447700000	1369500000	1592000000	1961400000
+	1.51553	2.03259	4.09139	Q67Z52	Q67Z52	2419	TFCB	Tubulin-folding cofactor B	Color2 [DarkGray]	1	4		cell division [GO:0051301];embryo development ending in seed dormancy [GO:0009793]	cytoplasm [GO:0005737];cytosol [GO:0005829];nucleus [GO:0005634];phragmoplast [GO:0009524]		+	14	14	14	79.4	79.4	79.4	27.33	0	74.549	3806900000	90	257960000	324100000	198260000	138220000	564720000	577440000	581980000	578570000	64513000	58909000	28550000	70675000	27213000	36759000	25060000	32475000	31965000	4617100	39994000	24041000	45939000	29129000
+	2.27657	2.03101	4.08691	Q42540	Q42540	2285	UBC7	Ubiquitin-conjugating enzyme E2 7	Color2 [DarkGray]	1	4				ATP binding [GO:0005524];ubiquitin conjugating enzyme activity [GO:0061631]	+	8	8	4	41	41	19.3	18.722	0	78.802	7901600000	108	760510000	752590000	604660000	605230000	659750000	756380000	798300000	825190000	193580000	190280000	234170000	122960000	116120000	153810000	114660000	174550000	119730000	36154000	111820000	56136000	160010000	66495000
+	2.00621	2.02629	4.07356	O81716	O81716	1539	PPC4-2	Probable protein phosphatase 2C 21	Color2 [DarkGray]	1	4		response to abscisic acid [GO:0009737]	plasma membrane [GO:0005886];vacuole [GO:0005773]	magnesium-dependent protein serine/threonine phosphatase activity [GO:0004724];metal ion binding [GO:0046872];protein serine/threonine phosphatase activity [GO:0004722]	+	24	24	21	64.2	64.2	57.7	39.354	0	108.31	8167600000	136	780500000	674260000	598280000	684160000	843690000	955960000	1014200000	895820000	143540000	156200000	186430000	189540000	108170000	71163000	65305000	55350000	109830000	56518000	92867000	61587000	116370000	117730000
+	1.80387	2.0227	4.06343	Q39099	Q39099	2189	XTH4	Xyloglucan endotransglucosylase/hydrolase protein 4	Color2 [DarkGray]	1	4		cell wall biogenesis [GO:0042546];cell wall organization [GO:0071555];response to auxin [GO:0009733];response to low light intensity stimulus [GO:0009645];response to mechanical stimulus [GO:0009612];unidimensional cell growth [GO:0009826];xyloglucan metabolic process [GO:0010411]	apoplast [GO:0048046];cell wall [GO:0005618];cytoplasm [GO:0005737];extracellular region [GO:0005576];mitochondrion [GO:0005739];plant-type cell wall [GO:0009505];plasmodesma [GO:0009506]	hydrolase activity, hydrolyzing O-glycosyl compounds [GO:0004553];xyloglucan:xyloglucosyl transferase activity [GO:0016762]	+	34	34	34	68.2	68.2	68.2	34.291	0	323.31	64067000000	423	1991500000	866990000	316800000	755650000	3335200000	589650000	2029000000	1029700000	4603600000	3611600000	4888600000	3463100000	2237800000	2384000000	3000700000	3245200000	2849100000	1838200000	2817200000	3189200000	4538000000	3240500000
+	2.03037	2.02203	4.06155	F4I962	F4I962	629	SNL3	SIN3-like 3	Color2 [DarkGray]	1	4		regulation of transcription, DNA-templated [GO:0006355]	nucleus [GO:0005634]	transcription corepressor activity [GO:0003714]	+	7	6	5	7.4	6.6	5.8	150.82	0	6.5559	2094300000	8	51321000	49974000	46432000	184550000	295080000	52970000	54224000	46055000	111450000	102880000	94074000	97672000	62285000	74221000	78319000	83446000	70419000	56797000	73537000	64390000	101550000	75394000
+	2.3733	2.02083	4.05816	Q9STN3	Q9STN3	5610	At4g08350	Putative transcription elongation factor SPT5 homolog 1	Color2 [DarkGray]	1	4		regulation of DNA-templated transcription, elongation [GO:0032784];regulation of transcription by RNA polymerase II [GO:0006357];transcription elongation from RNA polymerase II promoter [GO:0006368];translation [GO:0006412]	DSIF complex [GO:0032044];ribosome [GO:0005840]	mRNA binding [GO:0003729];structural constituent of ribosome [GO:0003735]	+	21	21	17	23.5	23.5	20.3	115.4	0	43.331	3457800000	75	248770000	252140000	149970000	181540000	391950000	422150000	377550000	557890000	51652000	51670000	71806000	55234000	34476000	52859000	60259000	44559000	71217000	39373000	50682000	63268000	54392000	35299000
+	2.53882	2.02041	4.05699	Q949P2	Q949P2	3436	CYOP	Probable cytosolic oligopeptidase A	Color2 [DarkGray]	1	4		peptide metabolic process [GO:0006518];proteolysis [GO:0006508];response to cadmium ion [GO:0046686]	apoplast [GO:0048046];chloroplast [GO:0009507];cytosol [GO:0005829];plasma membrane [GO:0005886]	metal ion binding [GO:0046872];metalloendopeptidase activity [GO:0004222]	+	66	29	29	81.6	49.1	49.1	79.043	0	222.94	13371000000	251	1353200000	1390000000	981530000	942580000	1413700000	1260500000	1333200000	1068500000	248680000	336700000	412560000	330440000	184580000	181250000	198860000	189510000	135420000	95261000	113180000	193290000	318040000	239790000
+	2.93145	2.01576	4.04393	Q38910	Q38910	2153	XTH23	Probable xyloglucan endotransglucosylase/hydrolase protein 23	Color2 [DarkGray]	1	4		cell wall biogenesis [GO:0042546];cell wall organization [GO:0071555];xyloglucan metabolic process [GO:0010411]	apoplast [GO:0048046];cell wall [GO:0005618];Golgi apparatus [GO:0005794]	hydrolase activity, hydrolyzing O-glycosyl compounds [GO:0004553];xyloglucan:xyloglucosyl transferase activity [GO:0016762]	+	10	5	5	30.4	20.6	20.6	32.064	0	21.06	732660000	10	6463800	5089100	0	4597100	10533000	28367000	54541000	7636800	135540000	129730000	199870000	143800000	0	0	0	0	6486200	0	0	0	0	0
+	3.07206	2.0156	4.0435	Q8L4Q6	Q8L4Q6	2762	At5g25070	Neurofilament light protein	Color2 [DarkGray]	1	4			cytosol [GO:0005829];plastid [GO:0009536]		+	19	19	19	30.2	30.2	30.2	82.14	0	136.1	2845300000	79	241330000	300740000	226560000	236940000	373350000	344830000	426910000	426900000	62708000	31610000	37620000	26795000	9926400	16132000	13252000	9751400	10027000	4617600	5813600	13146000	0	4463100
+	2.59766	2.01546	4.04309	P0CJ46	P0CJ46	1614	ACT1	Actin-1	Color2 [DarkGray]	1	4		developmental growth [GO:0048589];root hair elongation [GO:0048767]	cell wall [GO:0005618];cytoplasm [GO:0005737];cytoskeleton [GO:0005856];cytosol [GO:0005829];endoplasmic reticulum [GO:0005783];plasma membrane [GO:0005886];plasmodesma [GO:0009506]	ATP binding [GO:0005524];structural constituent of cytoskeleton [GO:0005200]	+	46	22	12	83.3	50.7	32.6	41.797	0	323.31	44707000000	340	3997000000	4065000000	4109400000	3526700000	3623100000	3661700000	3989300000	3861400000	1104700000	1047000000	1153900000	697160000	497800000	786620000	818450000	770460000	753590000	439760000	757040000	797480000	963450000	1186700000
+	2.76294	2.01416	4.03945	F4IFA9	F4IFA9	668	At2g04690	Pyridoxamine 5'-phosphate oxidase family protein	Color2 [DarkGray]	1	4					+	7	7	7	47.3	47.3	47.3	22.821	0	46.751	11823000000	63	36460000	17965000	0	8209400	11918000	23571000	17749000	31317000	477420000	663470000	622480000	550600000	428750000	670520000	684210000	893060000	664480000	394240000	658310000	829610000	936970000	820560000
+	4.55474	2.0137	4.03816	A0A1P8B2T3	A0A1P8B2T3	207	At2g32150	Haloacid dehalogenase-like hydrolase (HAD) superfamily protein	Color2 [DarkGray]	1	4				hydrolase activity [GO:0016787]	+	16	16	16	51.6	51.6	51.6	25.512	0	82.805	3198000000	48	47756000	52060000	20565000	18520000	76291000	106300000	39627000	64028000	698400000	617360000	764080000	616850000	13211000	0	0	0	4957800	21799000	8200200	0	0	9733500
+	7.30888	2.01351	4.03763	F4KHD5	F4KHD5	1060	MPO12.160	A-kinase anchor-like protein	Color2 [DarkGray]	1	4		lytic vacuole organization [GO:0080171]	chloroplast [GO:0009507];cytosol [GO:0005829];plasma membrane [GO:0005886]	kinase activity [GO:0016301]	+	189	189	189	69.3	69.3	69.3	323	0	323.31	80738000000	1399	6125400000	7327500000	5408700000	6103600000	5166100000	5387400000	5670500000	5197600000	5857600000	6269600000	6342300000	5599100000	748820000	1033600000	857320000	966720000	992120000	725220000	1163200000	969140000	662980000	578260000
+	2.18277	2.0114	4.03173	Q93Z18;Q8LPI7	Q93Z18	3333	CKL3	Casein kinase 1-like protein 3	Color2 [DarkGray]	1	4		blue light signaling pathway [GO:0009785];peptidyl-serine phosphorylation [GO:0018105];photomorphogenesis [GO:0009640];response to blue light [GO:0009637]	cytoplasm [GO:0005737];nucleus [GO:0005634]	ATP binding [GO:0005524];protein serine/threonine kinase activity [GO:0004674]	+	13	13	10	38.8	38.8	31.1	46.891	0	53.615	3642100000	64	134020000	250940000	182230000	255100000	191030000	265790000	254080000	237470000	139390000	125980000	154680000	142820000	109940000	94875000	80038000	109940000	118050000	183560000	92769000	107940000	92414000	82371000
+	2.12702	2.01091	4.03036	Q6NPN9	Q6NPN9	2466	DWA2	WD repeat-containing protein DWA2	Color2 [DarkGray]	1	4		abscisic acid-activated signaling pathway [GO:0009738];negative regulation of abscisic acid-activated signaling pathway [GO:0009788];protein ubiquitination [GO:0016567]	Cul4-RING E3 ubiquitin ligase complex [GO:0080008];nucleus [GO:0005634]		+	3	3	2	14	14	11.4	39.054	0	24.381	1157800000	27	141530000	134570000	87016000	98825000	129380000	56035000	101200000	134340000	22191000	19970000	18188000	22439000	13273000	11166000	14244000	11524000	14507000	9426800	17979000	10958000	14495000	42573000
+	3.94616	2.01073	4.02985	Q8L5Z4	Q8L5Z4	2777	YBEY	Endoribonuclease YBEY, chloroplastic	Color2 [DarkGray]	1	4		chloroplast organization [GO:0009658];chloroplast rRNA processing [GO:1901259]	chloroplast [GO:0009507];chloroplast stroma [GO:0009570]	endoribonuclease activity [GO:0004521];metal ion binding [GO:0046872];metalloendopeptidase activity [GO:0004222]	+	14	14	14	32.2	32.2	32.2	65.305	0	51.945	3935200000	70	123640000	102760000	59988000	85958000	138600000	196650000	170560000	264920000	183370000	175080000	221740000	174530000	123950000	149990000	159250000	159650000	123730000	109780000	178880000	169500000	232190000	220400000
+	2.35748	2.01034	4.02878	Q0WNE5	Q0WNE5	2057	KTI6	Kunitz trypsin inhibitor 6	Color2 [DarkGray]	1	4				serine-type endopeptidase inhibitor activity [GO:0004867]	+	2	2	2	8.9	8.9	8.9	22.932	1	-2	134950000	3	0	0	0	0	0	0	8128800	11252000	32291000	37637000	31671000	13968000	0	0	0	0	0	0	0	0	0	0
+	2.57787	2.01023	4.02846	Q9LJ98	Q9LJ98	4502	At3g22480	Probable prefoldin subunit 2	Color2 [DarkGray]	1	4		protein folding [GO:0006457]	cytoplasm [GO:0005737];prefoldin complex [GO:0016272]	protein folding chaperone [GO:0044183];unfolded protein binding [GO:0051082]	+	9	9	9	41.2	41.2	41.2	16.526	0	18.019	4637300000	72	166390000	190640000	247330000	127100000	409410000	378150000	271060000	352580000	171010000	98550000	125020000	181070000	101580000	210210000	121560000	143410000	118140000	77832000	177380000	166950000	224480000	215570000
+	2.89588	2.00774	4.02152	Q9ASR4	Q9ASR4	3624	At5g27410	Branched-chain-amino-acid aminotransferase-like protein 2	Color2 [DarkGray]	1	4		branched-chain amino acid biosynthetic process [GO:0009082]	cytosol [GO:0005829]	branched-chain-amino-acid transaminase activity [GO:0004084]	+	18	18	12	38.8	38.8	25.9	62.896	0	64.6	5886600000	106	359240000	390960000	302030000	293290000	758860000	696140000	689100000	848710000	63960000	115330000	355150000	70288000	47251000	102460000	88390000	94188000	24056000	11099000	44330000	58518000	157920000	93826000
+	3.87837	2.00541	4.01503	Q0WLB5	Q0WLB5	2050	CHC2	Clathrin heavy chain 2	Color2 [DarkGray]	1	4		endocytosis [GO:0006897];intracellular protein transport [GO:0006886];receptor-mediated endocytosis [GO:0006898];vesicle-mediated transport [GO:0016192]	chloroplast [GO:0009507];clathrin coat of coated pit [GO:0030132];clathrin coat of trans-Golgi network vesicle [GO:0030130];clathrin complex [GO:0071439];cytosol [GO:0005829];Golgi apparatus [GO:0005794];plasma membrane [GO:0005886];plasmodesma [GO:0009506]	clathrin light chain binding [GO:0032051];identical protein binding [GO:0042802];structural molecule activity [GO:0005198]	+	187	187	36	76.2	76.2	23	193.27	0	323.31	330930000000	1472	41132000000	43133000000	37563000000	36016000000	42617000000	43787000000	40426000000	41870000000	333610000	248300000	501550000	349480000	169740000	179410000	234550000	197630000	251870000	153080000	251920000	177560000	281550000	497350000
+	1.72425	2.0027	4.00748	C0Z2A8	C0Z2A8	464	FNR2	Ferredoxin--NADP reductase, chloroplastic	Color2 [DarkGray]	1	4			chloroplast [GO:0009507]	ferredoxin-NADP+ reductase activity [GO:0004324]	+	44	2	2	90.2	4.7	4.7	28.694	0	11.126	2139700000	32	0	0	0	0	5615400	0	0	0	190370000	270850000	262210000	221800000	20115000	25286000	114990000	32601000	12814000	130840000	153010000	150420000	148940000	113400000
+	4.45511	1.99885	3.99682	Q1EBV4	Q1EBV4	2104	DDI1	Protein DNA-DAMAGE INDUCIBLE 1	Color2 [DarkGray]	1	4		response to cadmium ion [GO:0046686]	cytosol [GO:0005829];nucleus [GO:0005634]	aspartic-type endopeptidase activity [GO:0004190];polyubiquitin modification-dependent protein binding [GO:0031593]	+	33	33	33	71	71	71	45.359	0	323.31	51338000000	649	2579500000	2652500000	1868700000	1815000000	2280200000	3180400000	2236100000	3305400000	2207400000	2276900000	2819800000	2462800000	1707000000	1733100000	1446300000	1868000000	1691700000	1582000000	1721500000	1996400000	1882200000	2000100000
+	6.84662	1.99852	3.9959	Q9C8L4	Q9C8L4	3770	GLY3	Persulfide dioxygenase ETHE1 homolog, mitochondrial	Color2 [DarkGray]	1	4		embryo development ending in seed dormancy [GO:0009793];endosperm development [GO:0009960];glutathione metabolic process [GO:0006749];hydrogen sulfide metabolic process [GO:0070813];seed development [GO:0048316]	mitochondrion [GO:0005739];nucleus [GO:0005634]	hydrolase activity, acting on ester bonds [GO:0016788];metal ion binding [GO:0046872];sulfur dioxygenase activity [GO:0050313]	+	33	33	33	72.4	72.4	72.4	32.332	0	323.31	134360000000	727	6360500000	6047800000	5188300000	4932700000	6959300000	7604300000	6826400000	7404000000	10389000000	9160500000	10496000000	9743800000	2550700000	2930100000	2978300000	2957100000	4249100000	3081000000	4384600000	4004500000	4236200000	3904200000
+	2.34827	1.99617	3.98939	Q9SN95	Q9SN95	5505	UXS5	UDP-glucuronic acid decarboxylase 5	Color2 [DarkGray]	1	4		D-xylose metabolic process [GO:0042732];UDP-D-xylose biosynthetic process [GO:0033320]	chloroplast [GO:0009507];cytoplasm [GO:0005737];cytosol [GO:0005829]	NAD+ binding [GO:0070403];UDP-glucuronate decarboxylase activity [GO:0048040]	+	33	5	3	73.9	20.5	15.2	38.389	0	97.086	2719300000	57	289960000	199720000	72348000	88542000	152900000	230400000	233990000	259890000	73711000	78204000	148580000	76624000	35945000	62315000	84846000	70773000	71281000	60134000	58171000	68385000	74356000	90294000
+	3.61199	1.99592	3.98871	Q9ZR12	Q9ZR12	5908	GRH1	GRR1-like protein 1	Color2 [DarkGray]	1	4		auxin-activated signaling pathway [GO:0009734];carbon catabolite repression of transcription by glucose [GO:0045014];defense response [GO:0006952];pollen maturation [GO:0010152];response to auxin [GO:0009733]	nucleus [GO:0005634];SCF ubiquitin ligase complex [GO:0019005]	auxin binding [GO:0010011];inositol hexakisphosphate binding [GO:0000822];ubiquitin-protein transferase activity [GO:0004842]	+	21	21	21	40.9	40.9	40.9	65.648	0	78.276	6067900000	105	776390000	795000000	576990000	611140000	760420000	696830000	747880000	715650000	51545000	68811000	70308000	55173000	0	6170100	7824000	10819000	20540000	0	13991000	0	32922000	12529000
+	3.59344	1.9939	3.98313	Q9LY48	Q9LY48	4853	JRG21	Probable 2-oxoglutarate-dependent dioxygenase JRG21	Color2 [DarkGray]	1	4		flavonoid biosynthetic process [GO:0009813];regulation of jasmonic acid mediated signaling pathway [GO:2000022]		dioxygenase activity [GO:0051213];jasmonic acid hydrolase [GO:0120091];metal ion binding [GO:0046872]	+	14	14	14	47.1	47.1	47.1	41.442	0	57.747	1482100000	36	0	0	0	0	0	6112900	0	6128900	362680000	337800000	396840000	336510000	0	2848400	5569700	0	3960200	3415300	20235000	0	0	0
+	4.27913	1.99267	3.97972	Q9FF98	Q9FF98	3887	ML3	MD-2-related lipid-recognition protein 3	Color2 [DarkGray]	1	4		defense response [GO:0006952]	endoplasmic reticulum [GO:0005783];ER body [GO:0010168];plant-type vacuole [GO:0000325];secretory vesicle [GO:0099503];vacuole [GO:0005773]		+	11	11	10	49.4	49.4	49.4	17.907	0	87.481	24826000000	181	1189300000	1472700000	1092300000	1159800000	2118500000	2199500000	2191000000	2368500000	1180800000	1141300000	1296100000	1250300000	413290000	519400000	438100000	495310000	505190000	425030000	581750000	659050000	577530000	488040000
+	5.33442	1.98837	3.96789	Q94C59	Q94C59	3520	PATL4	Patellin-4	Color2 [DarkGray]	1	4		cell cycle [GO:0007049];cell division [GO:0051301];cellular response to auxin stimulus [GO:0071365];protein localization involved in auxin polar transport [GO:1901703]	cytosol [GO:0005829];nucleus [GO:0005634];plasma membrane [GO:0005886]	lipid binding [GO:0008289]	+	84	84	84	85.4	85.4	85.4	61.189	0	323.31	118340000000	1232	9447100000	9839800000	7613700000	7932900000	7682100000	8576600000	7498800000	8476200000	4545500000	4756700000	5616700000	4910400000	1843200000	2223200000	2269900000	2306300000	3045700000	1786900000	2539000000	2689500000	3387900000	2959500000
+	2.43924	1.98633	3.96227	Q9ZT91	Q9ZT91	5932	TUFA	Elongation factor Tu, mitochondrial	Color2 [DarkGray]	1	4		mitochondrial translational elongation [GO:0070125];response to cadmium ion [GO:0046686];translational elongation [GO:0006414]	cell wall [GO:0005618];cytosol [GO:0005829];mitochondrion [GO:0005739]	ATP binding [GO:0005524];cobalt ion binding [GO:0050897];GTP binding [GO:0005525];GTPase activity [GO:0003924];translation elongation factor activity [GO:0003746];zinc ion binding [GO:0008270]	+	58	58	57	84.4	84.4	84.4	49.409	0	323.31	167330000000	666	17659000000	20355000000	14642000000	14510000000	22249000000	21877000000	21100000000	21977000000	545900000	1122400000	1373100000	1428300000	452690000	269270000	806930000	715950000	650100000	277870000	708510000	623830000	1142200000	1127600000
+	1.94667	1.98479	3.95806	Q949U7	Q949U7	3443	PRXIIE	Peroxiredoxin-2E, chloroplastic	Color2 [DarkGray]	1	4		cell redox homeostasis [GO:0045454];cellular response to oxidative stress [GO:0034599];defense response to bacterium [GO:0042742];hydrogen peroxide catabolic process [GO:0042744]	chloroplast [GO:0009507];chloroplast envelope [GO:0009941];chloroplast stroma [GO:0009570];cytoplasm [GO:0005737];cytosol [GO:0005829];plastid [GO:0009536];thylakoid [GO:0009579]	thioredoxin peroxidase activity [GO:0008379]	+	25	25	25	65.8	65.8	65.8	24.684	0	323.31	242820000000	788	2424900000	2650400000	2195300000	2171800000	3215600000	3865100000	3215000000	3465800000	19665000000	15782000000	17294000000	13543000000	11370000000	11909000000	11626000000	11987000000	11811000000	11536000000	12111000000	12361000000	15616000000	13987000000
+	6.83851	1.98279	3.95256	Q06327	Q06327	2026	LOX1	Linoleate 9S-lipoxygenase 1	Color2 [DarkGray]	1	4		lateral root formation [GO:0010311];lipid oxidation [GO:0034440];oxylipin biosynthetic process [GO:0031408];response to abscisic acid [GO:0009737];response to jasmonic acid [GO:0009753];root development [GO:0048364]	plastid [GO:0009536]	linoleate 9S-lipoxygenase activity [GO:1990136];metal ion binding [GO:0046872];oxidoreductase activity, acting on single donors with incorporation of molecular oxygen, incorporation of two atoms of oxygen [GO:0016702]	+	83	83	83	72.2	72.2	72.2	98.044	0	323.31	64980000000	835	6400100000	6899400000	5438500000	4920800000	5041000000	4577500000	4349000000	4535800000	5097100000	4770400000	6094000000	5295400000	55237000	74448000	50704000	44590000	187400000	100280000	207200000	232720000	136170000	147730000
+	2.08714	1.9825	3.95178	Q8GYJ9	Q8GYJ9	2682	HINT 2	HISTIDINE TRIAD NUCLEOTIDE-BINDING 2	Color2 [DarkGray]	1	4			chloroplast [GO:0009507];cytoplasm [GO:0005737]	hydrolase activity [GO:0016787]	+	5	5	5	26.7	26.7	26.7	20.4	0	4.3693	824070000	12	0	0	0	0	0	0	0	0	61639000	89239000	57877000	102170000	38767000	40257000	26186000	24740000	45447000	41054000	31792000	14313000	59403000	79051000
+	2.58873	1.98126	3.94838	Q8GWS0	Q8GWS0	2649	GRXC5	Glutaredoxin-C5, chloroplastic	Color2 [DarkGray]	1	4		cell redox homeostasis [GO:0045454];cellular response to oxidative stress [GO:0034599];iron-sulfur cluster assembly [GO:0016226]	chloroplast [GO:0009507];cytoplasm [GO:0005737]	electron transfer activity [GO:0009055];glutathione-disulfide reductase activity [GO:0004362];protein disulfide oxidoreductase activity [GO:0015035]	+	13	13	13	55.2	55.2	55.2	18.813	0	162.18	9597100000	144	0	0	0	0	15608000	7731600	6323500	14697000	906800000	808870000	951530000	861410000	349700000	413860000	484390000	411840000	521890000	337740000	539040000	481170000	652930000	655540000
+	4.0712	1.98023	3.94556	P93736	P93736	1993	TWN2	Valine--tRNA ligase, mitochondrial 1	Color2 [DarkGray]	1	4		embryo development ending in seed dormancy [GO:0009793];tRNA aminoacylation for protein translation [GO:0006418];valyl-tRNA aminoacylation [GO:0006438]	chloroplast [GO:0009507];cytosol [GO:0005829];extracellular region [GO:0005576];mitochondrion [GO:0005739]	aminoacyl-tRNA editing activity [GO:0002161];ATP binding [GO:0005524];valine-tRNA ligase activity [GO:0004832]	+	110	110	108	72.6	72.6	72.6	125.92	0	323.31	129360000000	1527	6262800000	7338200000	5747200000	5511400000	9769900000	9158500000	8502300000	8515300000	5006500000	4050900000	5250900000	4978400000	2877900000	3422800000	3833100000	3885200000	3539000000	2412500000	3507300000	3703700000	5450900000	5690200000
+	2.62151	1.97922	3.9428	P50318	P50318	1866	At1g56190	Phosphoglycerate kinase 2, chloroplastic	Color2 [DarkGray]	1	4		galactolipid biosynthetic process [GO:0019375];gluconeogenesis [GO:0006094];glycolytic process [GO:0006096];positive regulation of oxidative phosphorylation [GO:1903862];reductive pentose-phosphate cycle [GO:0019253];regulation of defense response to virus by host [GO:0050691];response to cadmium ion [GO:0046686];thylakoid membrane organization [GO:0010027]	chloroplast [GO:0009507];chloroplast stroma [GO:0009570];cytosol [GO:0005829];mitochondrion [GO:0005739];nucleus [GO:0005634];plastid [GO:0009536];thylakoid [GO:0009579]	ADP binding [GO:0043531];ATP binding [GO:0005524];phosphoglycerate kinase activity [GO:0004618];protein kinase activity [GO:0004672]	+	66	32	32	83.7	51.9	51.9	49.938	0	323.31	151410000000	626	475520000	538580000	488470000	393210000	1125100000	772840000	901650000	780000000	10836000000	9452600000	11256000000	10424000000	8018000000	9098200000	8782000000	9039000000	7038400000	5328900000	7800000000	8492700000	9899400000	11343000000
+	3.35701	1.97892	3.94197	Q9SJ89	Q9SJ89	5395	FTRC	Ferredoxin-thioredoxin reductase catalytic chain, chloroplastic	Color2 [DarkGray]	1	4		oxidation-reduction process [GO:0055114]	chloroplast [GO:0009507];chloroplast envelope [GO:0009941];chloroplast stroma [GO:0009570]	4 iron, 4 sulfur cluster binding [GO:0051539];electron transfer activity [GO:0009055];ferredoxin:thioredoxin reductase activity [GO:0030385];ferredoxin-thioredoxin reductase activity [GO:0103012];metal ion binding [GO:0046872]	+	21	21	21	76	76	76	16.434	0	323.31	38614000000	248	62126000	55862000	0	0	8833200	4658800	109670000	5151600	3625400000	3384200000	4103000000	3492800000	1825800000	1993100000	1955600000	1985700000	2040000000	1438300000	1611100000	1732200000	2426500000	2283600000
+	1.78082	1.9782	3.94001	Q9FI36	Q9FI36	3995	MDN11.10	2-oxoglutarate (2OG) and Fe(II)-dependent oxygenase superfamily protein	Color2 [DarkGray]	1	4				dioxygenase activity [GO:0051213]	+	14	14	14	44.5	44.5	44.5	39.846	0	81.915	8922300000	164	209530000	302150000	215700000	556220000	393220000	391420000	664830000	309260000	373420000	207860000	378870000	309950000	221560000	388880000	439280000	420140000	331090000	184650000	532620000	255760000	563760000	409460000
+	1.51086	1.97794	3.93929	Q944I4	Q944I4	3415	GLYK	D-glycerate 3-kinase, chloroplastic	Color2 [DarkGray]	1	4		oxidative photosynthetic carbon pathway [GO:0009854];photorespiration [GO:0009853]	chloroplast [GO:0009507];chloroplast envelope [GO:0009941];chloroplast stroma [GO:0009570];cytoplasm [GO:0005737];mitochondrion [GO:0005739]	ATP binding [GO:0005524];glycerate kinase activity [GO:0008887];kinase activity [GO:0016301]	+	44	44	44	64	64	64	51.017	0	323.31	174830000000	739	320670000	352990000	334680000	27145000	419760000	414730000	833720000	395470000	12553000000	12917000000	12240000000	12196000000	7032800000	8398700000	9646200000	9362200000	10706000000	7789700000	10872000000	9938500000	12363000000	11942000000
+	3.33516	1.97759	3.93835	Q8LAH4	Q8LAH4	2853	At4g28703	RmlC-like cupins superfamily protein	Color2 [DarkGray]	1	4					+	1	1	1	10.3	10.3	10.3	12.155	0	4.0638	218550000	5	14085000	10351000	8159800	9466600	26892000	21619000	29821000	25453000	17457000	0	23863000	21574000	0	0	0	0	0	0	0	0	4006100	0
+	2.3278	1.97658	3.93559	Q84JW0	Q84JW0	2533	At3g28760	3-dehydroquinate synthase	Color2 [DarkGray]	1	4		aromatic amino acid family biosynthetic process [GO:0009073]		3-dehydroquinate synthase activity [GO:0003856];oxidoreductase activity [GO:0016491]	+	12	12	12	32.7	32.7	32.7	47.047	0	38.704	2367300000	51	62083000	55591000	6685400	45678000	0	66592000	0	0	161080000	194230000	186460000	175050000	129910000	127100000	127300000	148340000	101790000	94236000	138490000	101070000	129470000	89162000
+	5.22475	1.97622	3.93462	Q96262	Q96262	3597	PCAP1	Plasma membrane-associated cation-binding protein 1	Color2 [DarkGray]	1	4		cellular response to copper ion [GO:0071280];cellular response to iron ion [GO:0071281];cellular response to magnesium ion [GO:0071286];cellular response to magnesium starvation [GO:0010350];cellular response to mannitol stimulus [GO:0071325];cellular response to molecule of bacterial origin [GO:0071219];cellular response to potassium ion [GO:0035865];cellular response to salt stress [GO:0071472]…	anchored component of plasma membrane [GO:0046658];cytoplasmic microtubule [GO:0005881];cytosol [GO:0005829];host cell [GO:0043657];plasma membrane [GO:0005886];plasmodesma [GO:0009506];vacuole [GO:0005773]	calcium ion binding [GO:0005509];calmodulin binding [GO:0005516];copper ion binding [GO:0005507];microtubule binding [GO:0008017];phosphatidylinositol-3,4,5-trisphosphate binding [GO:0005547];phosphatidylinositol-3,4-bisphosphate binding [GO:0043325];phosphatidylinositol-3,5-bisphosphate binding [GO:0080025];phosphatidylinositol-4,5-bisphosphate binding [GO:0005546]	+	57	57	57	99.6	99.6	99.6	24.584	0	323.31	213360000000	1234	4632400000	5087700000	3796500000	3777900000	1992400000	1990300000	1853500000	1943600000	16313000000	16845000000	17283000000	17620000000	6718500000	8366200000	7577900000	9055000000	11167000000	7175700000	12008000000	11411000000	12445000000	10851000000
+	3.42564	1.9731	3.9261	Q8H7F6	Q8H7F6	2751	GRXS16	Bifunctional monothiol glutaredoxin-S16, chloroplastic	Color2 [DarkGray]	1	4		cation transport [GO:0006812]	chloroplast [GO:0009507];chloroplast stroma [GO:0009570];mitochondrial matrix [GO:0005759];mitochondrion [GO:0005739]	2 iron, 2 sulfur cluster binding [GO:0051537];electron transfer activity [GO:0009055];hydrolase activity [GO:0016787];metal ion binding [GO:0046872];protein disulfide oxidoreductase activity [GO:0015035]	+	21	21	21	65.2	65.2	65.2	32.205	0	286.07	41971000000	283	110980000	113030000	89801000	99887000	206030000	196420000	182790000	201580000	3584700000	3056100000	3171300000	3321800000	1615800000	2270500000	2145200000	2341700000	2547600000	1812000000	2517300000	2577500000	2305600000	2386400000
+	4.70092	1.9722	3.92365	P29513	P29513	1703	TUBB5	Tubulin beta-5 chain	Color2 [DarkGray]	1	4		microtubule cytoskeleton organization [GO:0000226];microtubule-based process [GO:0007017];mitotic cell cycle [GO:0000278]	cell wall [GO:0005618];chloroplast stroma [GO:0009570];cytoplasm [GO:0005737];cytosol [GO:0005829];microtubule [GO:0005874];nucleus [GO:0005634];plasma membrane [GO:0005886];tubulin complex [GO:0045298];vacuolar membrane [GO:0005774]	GTP binding [GO:0005525];GTPase activity [GO:0003924];structural constituent of cytoskeleton [GO:0005200]	+	40	19	13	79.7	41.4	28.5	50.342	0	323.31	86941000000	390	8791500000	9088500000	7287600000	7374700000	9823600000	8883500000	7098400000	8827900000	1520100000	848390000	1474600000	1308100000	1210700000	1388600000	1566000000	1576700000	465280000	210710000	534290000	495450000	2196300000	1165800000
+	3.87023	1.97213	3.92347	Q9M2V1;REV__Q9ZW74;REV__P47735	Q9M2V1	5020	NCA1	Protein NCA1	Color2 [DarkGray]	1	4		positive regulation of catalase activity [GO:1902553];protein ubiquitination [GO:0016567]	cytosol [GO:0005829];nucleus [GO:0005634]	metal ion binding [GO:0046872];ubiquitin protein ligase activity [GO:0061630]	+	22	22	22	59.5	59.5	59.5	44.53	0	110.43	8812500000	207	283490000	241820000	133410000	199190000	206410000	159800000	241020000	163130000	411930000	543800000	686950000	468560000	367390000	410190000	382060000	410020000	326800000	256710000	345780000	363540000	592990000	435710000
+	2.20751	1.96882	3.91448	Q84P23	Q84P23	2564	4CLL9	4-coumarate--CoA ligase-like 9	Color2 [DarkGray]	1	4		jasmonic acid biosynthetic process [GO:0009695];oxylipin biosynthetic process [GO:0031408]	peroxisome [GO:0005777]	ATP binding [GO:0005524];CoA-ligase activity [GO:0016405];fatty-acyl-CoA synthase activity [GO:0004321]	+	16	15	15	29.2	28.1	28.1	61.277	0	70.61	9241800000	154	303790000	324800000	266300000	311080000	341070000	390920000	306380000	320170000	576100000	494780000	663230000	586740000	223900000	278980000	398010000	427870000	391060000	234510000	341310000	409140000	399200000	441170000
+	2.89735	1.96785	3.91185	P46309	P46309	1813	GSH1	Glutamate--cysteine ligase, chloroplastic	Color2 [DarkGray]	1	4		defense response by callose deposition in cell wall [GO:0052544];defense response to bacterium [GO:0042742];defense response to bacterium, incompatible interaction [GO:0009816];defense response to fungus [GO:0050832];defense response to insect [GO:0002213];flower development [GO:0009908];glucosinolate biosynthetic process [GO:0019761];glutathione biosynthetic process [GO:0006750];indole phytoalex…	chloroplast [GO:0009507];chloroplast stroma [GO:0009570];cytosol [GO:0005829];plastid [GO:0009536]	ATP binding [GO:0005524];glutamate-cysteine ligase activity [GO:0004357]	+	45	45	45	61.1	61.1	61.1	58.562	0	323.31	148220000000	1012	4455000000	5588900000	4444800000	3941300000	6861000000	7467200000	7353600000	7576700000	6330400000	6460100000	7887200000	7562600000	4384800000	5486900000	5354100000	5736000000	5802200000	4312700000	6088800000	6561700000	6639100000	6491000000
+	2.45326	1.96772	3.91148	Q9LFY3	Q9LFY3	4438	At1g27030	At1g27030/T7N9_9	Color2 [DarkGray]	1	4					+	26	26	25	79.4	79.4	79.4	35.52	0	267.59	17898000000	189	2373500000	2622800000	2069300000	2130200000	1951500000	2341200000	1912200000	2114600000	32113000	31585000	33568000	34065000	5422900	25924000	31196000	45056000	5722700	0	4781300	6523400	9199500	40715000
+	2.71496	1.96336	3.89968	Q8RXE9	Q8RXE9	3033	OVA4	Tryptophan--tRNA ligase, chloroplastic/mitochondrial	Color2 [DarkGray]	1	4		tryptophanyl-tRNA aminoacylation [GO:0006436]	chloroplast [GO:0009507];cytosol [GO:0005829];mitochondrion [GO:0005739]	ATP binding [GO:0005524];tryptophan-tRNA ligase activity [GO:0004830]	+	20	20	20	47.1	47.1	47.1	45.3	0	205.26	15093000000	182	24959000	37008000	112680000	30234000	339230000	42308000	41316000	51833000	1150500000	1171000000	1521800000	1322900000	493610000	545140000	580970000	565720000	902120000	548990000	851200000	943610000	1008700000	873430000
+	2.38886	1.96204	3.89613	Q9SGR6;Q9SFF1	Q9SGR6	5317	sks5	AT1G76160 protein	Color2 [DarkGray]	1	4		iron ion homeostasis [GO:0055072];iron ion transport [GO:0006826]	apoplast [GO:0048046];cell wall [GO:0005618];plasma membrane [GO:0005886];plasmodesma [GO:0009506];secretory vesicle [GO:0099503]	copper ion binding [GO:0005507];ferroxidase activity [GO:0004322]	+	28	28	25	46.2	46.2	41.6	60.04	0	323.31	42978000000	431	1082100000	920950000	810470000	716940000	1144500000	1156200000	1261000000	1167200000	2952600000	2568600000	2919100000	2540500000	2282700000	1804500000	1807000000	1880200000	1882000000	1571400000	2143500000	1657300000	2387800000	1972000000
+	2.53563	1.96186	3.89563	A2RVV4	A2RVV4	363	MRI1.6	At5g57700	Color2 [DarkGray]	1	4					+	16	16	16	48.4	48.4	48.4	38.478	0	102.01	8834900000	191	354100000	458890000	343370000	297510000	358630000	339460000	309240000	310460000	345670000	345360000	569780000	446050000	322910000	317390000	378900000	273990000	289930000	146390000	297110000	307270000	536310000	520820000
+	4.03859	1.96065	3.89238	Q05728	Q05728	2023	PUR5	Phosphoribosylformylglycinamidine cyclo-ligase, chloroplastic	Color2 [DarkGray]	1	4		adenine biosynthetic process [GO:0046084];'de novo' IMP biosynthetic process [GO:0006189];purine nucleotide biosynthetic process [GO:0006164]	chloroplast [GO:0009507];chloroplast stroma [GO:0009570];cytosol [GO:0005829];mitochondrion [GO:0005739]	ATP binding [GO:0005524];copper ion binding [GO:0005507];phosphoribosylamine-glycine ligase activity [GO:0004637];phosphoribosylformylglycinamidine cyclo-ligase activity [GO:0004641]	+	23	23	23	64.5	64.5	64.5	41.504	0	323.31	37000000000	435	1004300000	1182100000	1036900000	938040000	1512500000	1794000000	1345600000	1655900000	2234000000	2234700000	2383800000	1892600000	1108400000	1342500000	1255400000	1249300000	1681400000	1081700000	1562100000	1517200000	1869100000	1513700000
+	2.05225	1.95965	3.88969	Q9FKA5	Q9FKA5	4080	At5g39570	Uncharacterized protein At5g39570	Color2 [DarkGray]	1	4			cytosol [GO:0005829];nucleus [GO:0005634];plastid [GO:0009536]	mRNA binding [GO:0003729];phosphatidic acid binding [GO:0070300]	+	15	15	15	57.7	57.7	57.7	43.526	0	323.31	31265000000	179	3329400000	3447900000	2714700000	3087500000	4772700000	4753000000	4403900000	4166200000	47963000	77292000	106200000	80603000	9905200	11491000	16132000	22539000	16335000	12548000	19015000	66224000	13911000	31499000
+	2.84574	1.95716	3.88296	Q9XI36	Q9XI36	5841	MBD10	Methyl-CpG-binding domain-containing protein 10	Color2 [DarkGray]	1	4			cytosol [GO:0005829];host cell nucleus [GO:0042025];nucleus [GO:0005634]	methyl-CpG binding [GO:0008327]	+	17	17	17	44.5	44.5	44.5	42.357	0	25.042	1794200000	38	63294000	78023000	26068000	30934000	54648000	62452000	60498000	13461000	160230000	225060000	125960000	101280000	52686000	74440000	70231000	84364000	123360000	38749000	49523000	56062000	37403000	65282000
+	2.03769	1.95665	3.8816	Q42593	Q42593	2303	APXT	L-ascorbate peroxidase T, chloroplastic	Color2 [DarkGray]	1	4		cellular response to oxidative stress [GO:0034599];chloroplast-nucleus signaling pathway [GO:0010019];cold acclimation [GO:0009631];hydrogen peroxide catabolic process [GO:0042744];hydrogen peroxide mediated signaling pathway [GO:0071588];response to reactive oxygen species [GO:0000302]	chloroplast [GO:0009507];chloroplast thylakoid [GO:0009534];chloroplast thylakoid membrane [GO:0009535];integral component of membrane [GO:0016021];mitochondrion [GO:0005739];thylakoid [GO:0009579]	heme binding [GO:0020037];L-ascorbate peroxidase activity [GO:0016688];metal ion binding [GO:0046872];peroxidase activity [GO:0004601]	+	15	10	10	37.1	30	30	46.092	0	46.71	2268400000	64	0	0	0	0	0	0	0	0	180160000	201700000	367480000	298490000	68355000	126770000	114770000	69982000	61994000	53284000	117630000	94403000	173180000	139390000
+	2.277	1.95625	3.88053	Q9ZP05	Q9ZP05	5875	PMDH2	Malate dehydrogenase 2, peroxisomal	Color2 [DarkGray]	1	4		glyoxylate cycle [GO:0006097];malate metabolic process [GO:0006108];regulation of fatty acid beta-oxidation [GO:0031998];regulation of photorespiration [GO:0080093];tricarboxylic acid cycle [GO:0006099]	chloroplast [GO:0009507];cytoplasm [GO:0005737];peroxisome [GO:0005777]	L-malate dehydrogenase activity [GO:0030060]	+	37	37	36	73.4	73.4	73.4	37.369	0	323.31	487290000000	972	192580000	151140000	193940000	159610000	377990000	603880000	333020000	352140000	38310000000	34029000000	40007000000	38753000000	18580000000	21705000000	24630000000	24703000000	31105000000	20895000000	29860000000	27837000000	35208000000	32978000000
+	2.59579	1.95531	3.87798	P54873	P54873	1894	HMGS	Hydroxymethylglutaryl-CoA synthase	Color2 [DarkGray]	1	4		acetyl-CoA metabolic process [GO:0006084];farnesyl diphosphate biosynthetic process, mevalonate pathway [GO:0010142];isopentenyl diphosphate biosynthetic process, mevalonate pathway [GO:0019287];sterol biosynthetic process [GO:0016126]	cytosol [GO:0005829];plasmodesma [GO:0009506]	hydroxymethylglutaryl-CoA synthase activity [GO:0004421]	+	46	46	46	68.8	68.8	68.8	51.094	0	323.31	61855000000	461	7514000000	7736900000	6033000000	6045700000	7515700000	7578600000	6751100000	7059300000	475140000	426070000	498060000	549690000	336920000	210900000	221910000	234990000	276140000	388830000	270120000	296470000	418910000	377560000
+	6.28397	1.95429	3.87526	O23404	O23404	1229	PPDK	Pyruvate, phosphate dikinase 1, chloroplastic	Color2 [DarkGray]	1	4		photosynthesis [GO:0015979];pyruvate metabolic process [GO:0006090]	chloroplast [GO:0009507];chloroplast stroma [GO:0009570];cytosol [GO:0005829];nucleus [GO:0005634]	ATP binding [GO:0005524];kinase activity [GO:0016301];metal ion binding [GO:0046872];pyruvate, phosphate dikinase activity [GO:0050242]	+	114	114	114	83	83	83	105.14	0	323.31	439150000000	1763	327310000	284150000	237930000	174100000	777520000	377530000	427040000	503560000	56058000000	52424000000	52112000000	54023000000	12007000000	12912000000	15411000000	16019000000	20345000000	14642000000	21802000000	20637000000	21926000000	25471000000
+	2.3402	1.95187	3.86876	Q9LVJ0	Q9LVJ0	4785	At3g17800	UV-B-induced protein At3g17800, chloroplastic	Color2 [DarkGray]	1	4		response to ozone [GO:0010193];response to UV-B [GO:0010224];response to wounding [GO:0009611]	chloroplast [GO:0009507]		+	4	4	4	15.2	15.2	15.2	46.067	0	7.6597	336570000	9	21470000	21433000	16972000	0	0	27168000	0	16775000	68739000	41044000	19510000	43711000	0	0	5850500	4910600	0	0	0	6757100	5969600	4982600
+	2.75331	1.94984	3.86331	Q9M9Q6	Q9M9Q6	5092	SCPL50	Serine carboxypeptidase-like 50	Color2 [DarkGray]	1	4		proteolysis involved in cellular protein catabolic process [GO:0051603]	extracellular region [GO:0005576];vacuole [GO:0005773]	serine-type carboxypeptidase activity [GO:0004185]	+	12	12	12	30	30	30	49.222	0	32.507	4331100000	83	107880000	83644000	244860000	89321000	81607000	101500000	36412000	55065000	229740000	171270000	294630000	258330000	152790000	153030000	225950000	236840000	188020000	62699000	156510000	158090000	308010000	334330000
+	2.30199	1.94961	3.86269	Q9FKT9	Q9FKT9	4102	NAS2	Nicotianamine synthase 2	Color2 [DarkGray]	1	4		nicotianamine biosynthetic process [GO:0030418];phloem transport [GO:0010233];pollen development [GO:0009555];pollen tube growth [GO:0009860];response to zinc ion [GO:0010043]		nicotianamine synthase activity [GO:0030410]	+	12	10	10	50.6	39.4	39.4	35.679	0	18.34	1943600000	33	51240000	92695000	35587000	49436000	463310000	354140000	430030000	362340000	15275000	12108000	33847000	12069000	0	0	8833300	0	3491800	0	0	0	0	8145400
+	2.78939	1.94118	3.84019	Q42406	Q42406	2267	CYP18-4	Peptidyl-prolyl cis-trans isomerase CYP18-4	Color2 [DarkGray]	1	4		protein folding [GO:0006457];protein peptidyl-prolyl isomerization [GO:0000413];signal transduction [GO:0007165]	apoplast [GO:0048046];chloroplast [GO:0009507];cytoplasm [GO:0005737];cytosol [GO:0005829];Golgi apparatus [GO:0005794];plasma membrane [GO:0005886];vacuolar membrane [GO:0005774]	cyclosporin A binding [GO:0016018];peptidyl-prolyl cis-trans isomerase activity [GO:0003755]	+	37	37	32	97.1	97.1	97.1	18.378	0	323.31	662550000000	1555	42162000000	41788000000	35989000000	33963000000	45273000000	49586000000	46069000000	47968000000	22172000000	21017000000	22984000000	18161000000	16712000000	20537000000	18596000000	20763000000	17442000000	14158000000	17413000000	18958000000	24788000000	22163000000
+	1.84329	1.93738	3.8301	F4JRN8	F4JRN8	915	At4g18810	NAD(P)-binding Rossmann-fold superfamily protein	Color2 [DarkGray]	1	4		mitochondrial respiratory chain complex I assembly [GO:0032981];NADH dehydrogenase complex assembly [GO:0010257]	chloroplast [GO:0009507];chloroplast stroma [GO:0009570];cytosol [GO:0005829];vacuole [GO:0005773]	unfolded protein binding [GO:0051082]	+	51	51	51	60.4	60.4	60.4	69.137	0	323.31	111410000000	662	149970000	33533000	60684000	12578000	160950000	54517000	51710000	65816000	9132900000	9466700000	10058000000	9293800000	4680600000	5119300000	5680200000	5369000000	7316600000	4998700000	6799600000	6830700000	6882500000	6260000000
+	3.01595	1.93698	3.82902	Q9M073	Q9M073	4930	At4g32870	At4g32870	Color2 [DarkGray]	1	4		abscisic acid-activated signaling pathway [GO:0009738];regulation of protein serine/threonine phosphatase activity [GO:0080163]	cytoplasm [GO:0005737];nucleus [GO:0005634]	abscisic acid binding [GO:0010427];protein phosphatase inhibitor activity [GO:0004864];signaling receptor activity [GO:0038023]	+	8	8	8	59.2	59.2	59.2	17.877	0	85.687	2104200000	44	72908000	102780000	118280000	120840000	186180000	132060000	150950000	77976000	326820000	348960000	201830000	223410000	0	14926000	0	0	898980	8141900	8883000	8402100	0	0
+	1.99547	1.93565	3.82551	Q9FN08	Q9FN08	4193	BGAL10	Beta-galactosidase 10	Color2 [DarkGray]	1	4		carbohydrate metabolic process [GO:0005975];response to karrikin [GO:0080167]	apoplast [GO:0048046];cell wall [GO:0005618];plastid [GO:0009536];vacuole [GO:0005773]	beta-galactosidase activity [GO:0004565]	+	31	28	28	42.2	40.4	40.4	83.101	0	235.12	13955000000	255	93550000	129720000	56273000	124380000	31737000	76272000	32560000	124370000	1195800000	1095900000	1300200000	1269700000	482870000	703890000	619910000	657600000	746950000	314020000	714570000	840010000	937100000	776310000
+	5.09192	1.93494	3.82362	O22793	O22793	1164	MORF2	Multiple organellar RNA editing factor 2, chloroplastic	Color2 [DarkGray]	1	4		cytidine to uridine editing [GO:0016554];endonucleolytic cleavage of tetracistronic rRNA transcript (SSU-rRNA, LSU-rRNA, 4.5S-rRNA, 5S-rRNA) [GO:0002103];mitochondrial mRNA modification [GO:0080156];mRNA processing [GO:0006397];plastid organization [GO:0009657]	chloroplast [GO:0009507];endoplasmic reticulum [GO:0005783];mitochondrion [GO:0005739]	protein dimerization activity [GO:0046983];protein homodimerization activity [GO:0042803]	+	4	3	3	15.5	15.5	15.5	24.715	0	13.939	533080000	10	3250500	0	0	0	3598300	4095500	10599000	0	74078000	60250000	85418000	55832000	16223000	22728000	9808300	9828700	35068000	26354000	25081000	19772000	20818000	6471900
+	2.6427	1.93307	3.81867	Q9LU36;A0A1I9LQ97	Q9LU36;A0A1I9LQ97	4733	4CL4;4CL5	4-coumarate--CoA ligase 4;4-coumarate:CoA ligase 5	Color2 [DarkGray]	1	4		phenylpropanoid biosynthetic process [GO:0009699]		4-coumarate-CoA ligase activity [GO:0016207];ATP binding [GO:0005524];CoA-ligase activity [GO:0016405];ligase activity [GO:0016874]	+	22	21	21	48.6	48.6	48.6	62.558	0	138.72	3938800000	73	739900000	721450000	493130000	549970000	142760000	149030000	130130000	144020000	70810000	39292000	143220000	118510000	28595000	55855000	0	50173000	29190000	23020000	29293000	47096000	43938000	66751000
+	2.72533	1.93265	3.81756	Q9LM66	Q9LM66	4558	XCP2	Cysteine protease XCP2	Color2 [DarkGray]	1	4		defense response to bacterium [GO:0042742];programmed cell death involved in cell development [GO:0010623];proteolysis involved in cellular protein catabolic process [GO:0051603]	cell wall [GO:0005618];extracellular space [GO:0005615];lysosome [GO:0005764];plasma membrane [GO:0005886]	cysteine-type endopeptidase activity [GO:0004197]	+	8	7	7	29.2	26.7	26.7	39.707	0	25.543	2263900000	43	138670000	111490000	105990000	87535000	214070000	261520000	210770000	220250000	107650000	90415000	114800000	77704000	43559000	49131000	49407000	49297000	31288000	25883000	36377000	37709000	51932000	53274000
+	2.12351	1.93236	3.81679	Q9LPL8	Q9LPL8	4614	At1g21350	AT1G21350 protein	Color2 [DarkGray]	1	4			chloroplast [GO:0009507];secretory vesicle [GO:0099503]	antioxidant activity [GO:0016209];oxidoreductase activity [GO:0016491]	+	15	15	15	56	56	56	28.089	0	171.83	13108000000	118	0	0	7927800	0	0	0	6274600	0	1457700000	1337800000	1176800000	890070000	531930000	639030000	695080000	655250000	844450000	408540000	898100000	793100000	739490000	494200000
+	3.807	1.92826	3.80596	Q84K35	Q84K35	2537	At1g50510	Indigoidine synthase A family protein	Color2 [DarkGray]	1	4			peroxisome [GO:0005777];plasma membrane [GO:0005886]	hydrolase activity, acting on glycosyl bonds [GO:0016798]	+	12	12	12	47.3	47.3	47.3	34.799	0	47.614	3499300000	44	104510000	197120000	153140000	175960000	205140000	95885000	153120000	149430000	146580000	149790000	239820000	160280000	63550000	55792000	137560000	117700000	159680000	118170000	74860000	162060000	194780000	189050000
+	3.18625	1.92784	3.80486	Q9FUP0	Q9FUP0	4259	OPR3	12-oxophytodienoate reductase 3	Color2 [DarkGray]	1	4		jasmonic acid biosynthetic process [GO:0009695];oxylipin biosynthetic process [GO:0031408];response to fungus [GO:0009620];response to ozone [GO:0010193];stamen development [GO:0048443]	peroxisome [GO:0005777]	12-oxophytodienoate reductase activity [GO:0016629];FMN binding [GO:0010181];oxidoreductase activity [GO:0016491]	+	31	31	31	87	87	87	42.691	0	323.31	58382000000	501	755130000	1190900000	625020000	712950000	1047800000	1009300000	1017800000	901190000	4043500000	3716000000	3966000000	3504300000	2294500000	2979700000	3264800000	3025000000	3187300000	2121200000	3128100000	3194100000	3479100000	2831900000
+	3.72495	1.92565	3.79907	Q38857	Q38857	2135	XTH22	Xyloglucan endotransglucosylase/hydrolase protein 22	Color2 [DarkGray]	1	4		cell wall biogenesis [GO:0042546];cellular response to hypoxia [GO:0071456];plant-type cell wall organization [GO:0009664];response to auxin [GO:0009733];response to brassinosteroid [GO:0009741];response to cold [GO:0009409];response to heat [GO:0009408];response to mechanical stimulus [GO:0009612];xyloglucan metabolic process [GO:0010411]	apoplast [GO:0048046];cell wall [GO:0005618];Golgi apparatus [GO:0005794];secretory vesicle [GO:0099503]	hydrolase activity, hydrolyzing O-glycosyl compounds [GO:0004553];xyloglucan:xyloglucosyl transferase activity [GO:0016762]	+	15	14	10	50.7	50.7	40.8	32.093	0	34.092	2877400000	40	6174300	6453700	12765000	5791100	0	18660000	16219000	16660000	740090000	452910000	740160000	721740000	17494000	14574000	10068000	8175600	0	19993000	0	11882000	14477000	13468000
+	4.25668	1.92541	3.79846	Q9SIM9	Q9SIM9	5369	MAX2	F-box protein MAX2	Color2 [DarkGray]	1	4		auxin polar transport [GO:0009926];auxin-activated signaling pathway [GO:0009734];cuticle development [GO:0042335];negative regulation of seed germination [GO:0010187];positive regulation of response to water deprivation [GO:1902584];protein ubiquitination [GO:0016567];regulation of meristem structural organization [GO:0009934];regulation of shoot system morphogenesis [GO:1900618];response to lig…	nucleus [GO:0005634];SCF ubiquitin ligase complex [GO:0019005]		+	4	4	4	8.9	8.9	8.9	77.415	0	6.7679	40729000000	17	2823400	5844100	0	0	15726000	19429000	6842800	6809700	4184100000	3669300000	3784900000	3614700000	2485200000	3200400000	3107400000	2942400000	3939100000	2187500000	3664500000	3243700000	129400000	145860000
+	3.69484	1.91915	3.78201	Q9SID0	Q9SID0	5355	At2g31390	Probable fructokinase-1	Color2 [DarkGray]	1	4		fructose metabolic process [GO:0006000];starch biosynthetic process [GO:0019252]	cytosol [GO:0005829];peroxisome [GO:0005777];plasma membrane [GO:0005886]	ATP binding [GO:0005524];carbohydrate kinase activity [GO:0019200];fructokinase activity [GO:0008865]	+	43	42	31	87.4	87.4	72	35.275	0	323.31	123250000000	694	12719000000	13979000000	11227000000	10882000000	13589000000	14088000000	11594000000	12659000000	1958800000	1531000000	1808500000	1700300000	861260000	1046200000	962480000	1567400000	1223600000	865360000	1135600000	1414600000	1974100000	1521000000
+	1.3938	1.9175	3.77769	Q9C5C8	Q9C5C8	3665	MSRB2	Peptide methionine sulfoxide reductase B2, chloroplastic	Color2 [DarkGray]	1	4		protein repair [GO:0030091];response to oxidative stress [GO:0006979]	chloroplast [GO:0009507];chloroplast stroma [GO:0009570];cytosol [GO:0005829]	metal ion binding [GO:0046872];peptide-methionine (R)-S-oxide reductase activity [GO:0033743]	+	14	14	13	55	55	50.5	21.968	0	189.25	33638000000	202	348630000	427630000	357960000	325450000	443830000	371330000	417050000	417120000	1969000000	2185800000	2571200000	2339500000	1486300000	1748000000	1603300000	1742500000	2169000000	946010000	1768200000	1372000000	2548700000	2305200000
+	7.71033	1.91143	3.76182	Q93V62	Q93V62	3261	At4g27450	AT4g27450/F27G19_50	Color2 [DarkGray]	1	4		cellular response to hypoxia [GO:0071456]	cytosol [GO:0005829];nucleus [GO:0005634];plasma membrane [GO:0005886];plasmodesma [GO:0009506]		+	14	14	14	56	56	56	27.622	0	215.04	12809000000	104	113770000	88224000	45251000	79224000	117700000	69725000	57811000	91121000	2741300000	2539300000	2511800000	2308500000	109160000	82931000	77546000	92979000	187540000	189120000	290510000	187280000	227070000	215920000
+	2.67385	1.90428	3.74322	Q8GYN9	Q8GYN9	2688	MENB	1,4-dihydroxy-2-naphthoyl-CoA synthase, peroxisomal	Color2 [DarkGray]	1	4		menaquinone biosynthetic process [GO:0009234];phylloquinone biosynthetic process [GO:0042372]	cytosol [GO:0005829];peroxisome [GO:0005777]	1,4-dihydroxy-2-naphthoyl-CoA synthase activity [GO:0008935];isomerase activity [GO:0016853]	+	12	12	12	40.1	40.1	40.1	37.056	0	18.996	2200400000	60	3900500	0	0	0	0	13562000	2861000	5015000	225440000	261680000	211330000	176230000	77842000	127100000	122900000	119920000	132180000	78669000	93781000	136400000	120260000	52840000
+	2.5342	1.90327	3.7406	F4I7X1	F4I7X1	624	SKS6	SKU5-similar 6	Color2 [DarkGray]	1	4		iron ion homeostasis [GO:0055072];iron ion transport [GO:0006826]	apoplast [GO:0048046];cell wall [GO:0005618];plasma membrane [GO:0005886];plasmodesma [GO:0009506];secretory vesicle [GO:0099503]	copper ion binding [GO:0005507];ferroxidase activity [GO:0004322]	+	20	17	16	36.3	31.7	28.8	60.577	0	222.07	24369000000	272	70081000	98488000	62981000	38773000	124820000	102820000	100330000	71779000	1523800000	1374300000	1672600000	1459300000	1196900000	1207600000	1433900000	1352100000	1286200000	925190000	1573100000	1517900000	1902200000	1714900000
+	4.77209	1.90299	3.73987	Q9STW6	Q9STW6	5617	HSP70-6	Heat shock 70 kDa protein 6, chloroplastic	Color2 [DarkGray]	1	4		cellular response to unfolded protein [GO:0034620];chaperone cofactor-dependent protein refolding [GO:0051085];protein refolding [GO:0042026];protein targeting to chloroplast [GO:0045036];response to cadmium ion [GO:0046686];response to cold [GO:0009409];response to heat [GO:0009408];response to unfolded protein [GO:0006986];viral process [GO:0016032]	chloroplast [GO:0009507];chloroplast envelope [GO:0009941];chloroplast stroma [GO:0009570];cytoplasm [GO:0005737];cytosol [GO:0005829];mitochondrion [GO:0005739];nucleus [GO:0005634];thylakoid [GO:0009579]	ATP binding [GO:0005524];ATPase activity [GO:0016887];heat shock protein binding [GO:0031072];misfolded protein binding [GO:0051787];protein folding chaperone [GO:0044183];unfolded protein binding [GO:0051082]	+	100	100	44	71	71	41.2	76.507	0	323.31	1131300000000	2984	11678000000	12556000000	9936300000	10343000000	13962000000	14854000000	15020000000	14757000000	89866000000	83435000000	94175000000	84685000000	49927000000	55019000000	56624000000	56815000000	58143000000	44587000000	59677000000	62467000000	60897000000	58942000000
+	3.54826	1.90208	3.73752	Q96321	Q96321	3606	IMPA1	Importin subunit alpha-1	Color2 [DarkGray]	1	4		NLS-bearing protein import into nucleus [GO:0006607];protein import into nucleus [GO:0006606]	cell wall [GO:0005618];cytosol [GO:0005829];host cell nucleus [GO:0042025];nuclear envelope [GO:0005635];nucleolus [GO:0005730];nucleus [GO:0005634]	nuclear import signal receptor activity [GO:0061608];nuclear localization sequence binding [GO:0008139]	+	44	44	23	85.2	85.2	60	58.644	0	323.31	56282000000	596	4531000000	4642900000	3819500000	3345400000	5415900000	5885200000	5264600000	5914900000	1509200000	1287100000	1820400000	1814500000	654530000	762460000	775140000	781300000	1069600000	526970000	959950000	1163300000	1056200000	1165000000
+	1.97006	1.90192	3.7371	Q9SQZ9	Q9SQZ9	5527	At3g04780	PITH domain-containing protein At3g04780	Color2 [DarkGray]	1	4			cytosol [GO:0005829]		+	6	6	6	33	33	33	19.67	0	20.49	2642800000	44	183800000	239010000	142660000	128080000	259310000	288470000	309630000	136720000	89573000	62653000	75900000	32738000	46313000	60995000	34991000	232900000	58051000	17070000	31055000	54582000	38214000	40303000
+	4.27273	1.90045	3.7333	O82200	O82200	1557	MIOX2	Inositol oxygenase 2	Color2 [DarkGray]	1	4		inositol catabolic process [GO:0019310];L-ascorbic acid biosynthetic process [GO:0019853]	cytoplasm [GO:0005737]	inositol oxygenase activity [GO:0050113];iron ion binding [GO:0005506]	+	4	4	4	12.3	12.3	12.3	37.047	0.00019161	2.7928	415210000	12	26822000	30659000	19781000	17207000	37118000	27687000	39118000	65291000	45155000	36463000	37988000	31921000	0	0	0	0	0	0	0	0	0	0
+	6.23361	1.90038	3.73311	Q96528	Q96528	3617	CAT1	Catalase-1	Color2 [DarkGray]	1	4		cellular response to nitrogen starvation [GO:0006995];cellular response to phosphate starvation [GO:0016036];cellular response to sulfate starvation [GO:0009970];hydrogen peroxide catabolic process [GO:0042744];response to abscisic acid [GO:0009737];response to cadmium ion [GO:0046686];response to hydrogen peroxide [GO:0042542];response to light stimulus [GO:0009416]	cell wall [GO:0005618];chloroplast envelope [GO:0009941];cytoplasm [GO:0005737];cytosol [GO:0005829];cytosolic ribosome [GO:0022626];mitochondrion [GO:0005739];nucleus [GO:0005634];peroxisome [GO:0005777]	catalase activity [GO:0004096];cobalt ion binding [GO:0050897];heme binding [GO:0020037]	+	33	12	12	51.8	23.2	23.2	56.761	0	96.932	4862600000	100	205270000	183090000	151590000	150470000	166970000	307290000	178600000	208330000	496800000	566480000	570970000	481250000	63252000	91971000	102970000	110080000	152670000	102280000	98345000	120840000	115330000	70280000
+	2.35172	1.8993	3.73032	Q8VYW2	Q8VYW2	3152	BAM9	Inactive beta-amylase 9	Color2 [DarkGray]	1	4		polysaccharide catabolic process [GO:0000272]	cytoplasm [GO:0005737]	beta-amylase activity [GO:0016161]	+	6	6	6	19.6	19.6	19.6	58.28	0	10.839	332400000	7	2585500	3108900	0	0	7970200	14526000	52381000	56137000	53895000	23968000	30358000	17328000	10996000	11315000	13013000	34815000	0	0	0	0	0	0
+	1.83187	1.89912	3.72987	P37107	P37107	1741	FFC	Signal recognition particle 54 kDa protein, chloroplastic	Color2 [DarkGray]	1	4		protein heterotrimerization [GO:0070208];SRP-dependent cotranslational protein targeting to membrane [GO:0006614]	chloroplast [GO:0009507];chloroplast stroma [GO:0009570];plasma membrane [GO:0005886];protein-containing complex [GO:0032991];signal recognition particle, endoplasmic reticulum targeting [GO:0005786]	7S RNA binding [GO:0008312];GTP binding [GO:0005525];GTPase activity [GO:0003924];protein domain specific binding [GO:0019904]	+	61	61	61	58.3	58.3	58.3	61.232	0	323.31	80931000000	803	94463000	121280000	161160000	104320000	258080000	149460000	174020000	165420000	7695300000	6871600000	8275400000	7040600000	3194700000	3763800000	4126700000	4064800000	4209200000	2909400000	4126000000	4074600000	5230200000	4705300000
+	1.47697	1.89792	3.72676	Q9M2P7	Q9M2P7	5012	PAP9	Probable plastid-lipid-associated protein 9, chloroplastic	Color2 [DarkGray]	1	4			chloroplast [GO:0009507];chloroplast thylakoid membrane [GO:0009535];cytosol [GO:0005829];plastoglobule [GO:0010287];thylakoid [GO:0009579];thylakoid lumen [GO:0031977]		+	15	15	15	48.1	48.1	48.1	34.091	0	219.44	10908000000	131	51979000	30120000	0	30223000	119550000	0	0	28320000	677040000	935690000	990330000	830750000	504930000	518680000	472980000	507440000	516300000	552510000	722970000	516820000	671590000	725530000
+	3.33791	1.89763	3.72601	O65271	O65271	1396	FOLD4	Bifunctional protein FolD 4, chloroplastic	Color2 [DarkGray]	1	4		one-carbon metabolic process [GO:0006730];photorespiration [GO:0009853];tetrahydrofolate interconversion [GO:0035999]	chloroplast [GO:0009507];cytosol [GO:0005829]	methenyltetrahydrofolate cyclohydrolase activity [GO:0004477];methylenetetrahydrofolate dehydrogenase (NADP+) activity [GO:0004488]	+	20	20	20	69.2	69.2	69.2	38.741	0	186.33	17985000000	308	461360000	511160000	416540000	387630000	751690000	648420000	563620000	662110000	1082100000	971380000	1125100000	1024600000	494230000	660830000	657100000	605280000	986140000	583940000	950370000	887460000	948220000	836680000
+	2.06506	1.89712	3.72468	F4HUG9	F4HUG9	554	At1g14210	Ribonuclease T2 family protein	Color2 [DarkGray]	1	4		RNA catabolic process [GO:0006401]	extracellular region [GO:0005576];secretory vesicle [GO:0099503]	endoribonuclease activity [GO:0004521];ribonuclease T2 activity [GO:0033897];RNA binding [GO:0003723]	+	12	12	12	37.2	37.2	37.2	28.186	0	59.881	5341600000	120	359750000	431000000	239740000	217940000	257760000	516930000	539750000	491750000	193570000	176390000	139920000	183030000	94355000	90559000	166420000	102100000	165590000	86478000	135830000	47628000	241200000	140690000
+	5.92742	1.89537	3.72016	Q9FI56	Q9FI56	4000	CLPC1	Chaperone protein ClpC1, chloroplastic	Color2 [DarkGray]	1	4		chloroplast organization [GO:0009658];protein import into chloroplast stroma [GO:0045037];protein targeting to chloroplast [GO:0045036];regulation of chlorophyll biosynthetic process [GO:0010380]	cell wall [GO:0005618];chloroplast [GO:0009507];chloroplast envelope [GO:0009941];chloroplast inner membrane [GO:0009706];chloroplast stroma [GO:0009570];chloroplast thylakoid membrane [GO:0009535];mitochondrion [GO:0005739];plastid [GO:0009536];plastid stroma [GO:0009532];Tic complex [GO:0031897]	ATP binding [GO:0005524];ATP-dependent peptidase activity [GO:0004176]	+	101	101	45	73.3	73.3	31	103.45	0	323.31	194560000000	1557	8118900000	8702200000	7207100000	7680800000	11069000000	12149000000	10199000000	11508000000	7878000000	8043900000	7906500000	7842300000	6078600000	7091700000	6776300000	6610100000	5440100000	3872200000	5130700000	5165300000	10294000000	10343000000
+	3.74449	1.89276	3.71345	O82234	O82234	1564	IF3-2	Translation initiation factor IF3-2, chloroplastic	Color2 [DarkGray]	1	4		chloroplast organization [GO:0009658];leaf development [GO:0048366];ribosome disassembly [GO:0032790]	chloroplast [GO:0009507];vacuole [GO:0005773]	ribosome binding [GO:0043022];translation initiation factor activity [GO:0003743]	+	15	15	10	37.8	37.8	27.6	35.141	0	46.452	3551900000	87	6151800	0	17115000	0	23612000	0	0	0	373180000	443440000	385550000	369520000	134040000	161740000	115420000	152530000	168080000	103220000	161300000	165020000	220710000	169610000
+	2.16926	1.89233	3.71234	Q9ZPY1	Q9ZPY1	5888	PPOX2	Pyridoxine/pyridoxamine 5'-phosphate oxidase 2	Color2 [DarkGray]	1	4		pyridoxal 5'-phosphate salvage [GO:0009443];pyridoxine biosynthetic process [GO:0008615]		FMN binding [GO:0010181];pyridoxamine-phosphate oxidase activity [GO:0004733]	+	6	6	6	28.8	28.8	28.8	22.619	0	21.113	2498200000	38	6264000	8826700	0	40041000	12111000	639880000	10001000	0	144830000	155480000	154210000	102990000	57613000	118840000	142970000	96714000	27804000	85691000	67748000	27048000	192610000	138420000
+	3.47428	1.89219	3.71199	Q67XZ3	Q67XZ3	2411	CWINV3	Beta-fructofuranosidase, insoluble isoenzyme CWINV3	Color2 [DarkGray]	1	4		carbohydrate metabolic process [GO:0005975]	apoplast [GO:0048046];cell wall [GO:0005618];vacuole [GO:0005773]	fructan beta-fructosidase activity [GO:0051669]	+	15	13	13	35.4	31.3	31.3	67.067	0	31.389	5897300000	118	308580000	299370000	230160000	201790000	162450000	241080000	183630000	163240000	268260000	281370000	244520000	285560000	206390000	243770000	217070000	286410000	349140000	169410000	175650000	202850000	378560000	228460000
+	6.05164	1.89163	3.71054	Q96291	Q96291	3600	BAS1	2-Cys peroxiredoxin BAS1, chloroplastic	Color2 [DarkGray]	1	4		cell redox homeostasis [GO:0045454];defense response to bacterium [GO:0042742];response to cold [GO:0009409];response to oxidative stress [GO:0006979]	apoplast [GO:0048046];chloroplast [GO:0009507];chloroplast envelope [GO:0009941];chloroplast stroma [GO:0009570];cytosol [GO:0005829];stromule [GO:0010319];thylakoid [GO:0009579]	peroxidase activity [GO:0004601];peroxiredoxin activity [GO:0051920];thioredoxin peroxidase activity [GO:0008379]	+	28	28	18	60.9	60.9	46.6	29.092	0	323.31	458130000000	982	876220000	831050000	578020000	464850000	1073300000	974140000	777540000	963620000	42617000000	36880000000	47453000000	38864000000	17525000000	18069000000	21357000000	22359000000	25371000000	21517000000	28805000000	25915000000	26895000000	24147000000
+	2.42444	1.89126	3.7096	Q9SEU8;F4JG94	Q9SEU8;F4JG94	5277	TRXM2;ATHM2	Thioredoxin M2, chloroplastic;Thioredoxin superfamily protein	Color2 [DarkGray]	1	4		cell redox homeostasis [GO:0045454];glycerol ether metabolic process [GO:0006662];positive regulation of catalytic activity [GO:0043085]	chloroplast [GO:0009507];chloroplast stroma [GO:0009570];chloroplast thylakoid membrane [GO:0009535];cytoplasm [GO:0005737];cytosol [GO:0005829];thylakoid [GO:0009579]	enzyme activator activity [GO:0008047];oxidoreductase activity, acting on a sulfur group of donors, disulfide as acceptor [GO:0016671];protein disulfide oxidoreductase activity [GO:0015035];protein-disulfide reductase activity [GO:0047134]	+	14	14	14	48.4	48.4	48.4	20.312	0	323.31	40430000000	229	198310000	190890000	164660000	133040000	276210000	246500000	316810000	298450000	2523900000	2645500000	3085900000	2915600000	2352000000	2221900000	2113800000	2289700000	2462900000	1902900000	2399300000	2267000000	2272100000	2413500000
+	6.60125	1.89124	3.70953	Q9SCV8	Q9SCV8	5238	BGAL4	Beta-galactosidase 4	Color2 [DarkGray]	1	4		carbohydrate metabolic process [GO:0005975]	apoplast [GO:0048046];cell wall [GO:0005618];plastid [GO:0009536];vacuole [GO:0005773]	beta-galactosidase activity [GO:0004565]	+	49	46	35	57.3	56.5	47.8	80.59	0	323.31	22604000000	254	32906000	39118000	21200000	26561000	28204000	43937000	40934000	21036000	4654500000	4262400000	5437600000	5321100000	164430000	155630000	184570000	181590000	311480000	260220000	458980000	347860000	169430000	152440000
+	1.46587	1.88814	3.70159	C0Z2P1	C0Z2P1	466	At1g74840	AT1G74840 protein	Color2 [DarkGray]	1	4			nucleus [GO:0005634]	DNA binding [GO:0003677]	+	3	3	3	16.3	16.3	16.3	26.586	0.0048913	1.8599	655090000	17	44063000	45531000	37815000	35409000	21865000	44094000	38009000	39658000	33792000	32376000	23171000	30406000	14181000	19052000	21723000	16675000	32163000	18738000	26235000	0	22932000	15191000
+	5.5202	1.88795	3.7011	Q9SZU7	Q9SZU7	5782	KAI2	Probable esterase KAI2	Color2 [DarkGray]	1	4		de-etiolation [GO:0009704];photomorphogenesis [GO:0009640];response to karrikin [GO:0080167]	cytosol [GO:0005829];nucleus [GO:0005634]	hydrolase activity [GO:0016787]	+	7	7	7	41.1	41.1	41.1	29.791	0	58.654	2881800000	47	307270000	216820000	252650000	255990000	316520000	338370000	373120000	429340000	13553000	14481000	34071000	30915000	12259000	22057000	13512000	11116000	0	0	0	0	68604000	43421000
+	4.31168	1.88588	3.69579	Q9S9W2	Q9S9W2	5185	SDRA	Short-chain dehydrogenase/reductase SDRA	Color2 [DarkGray]	1	4		fatty acid metabolic process [GO:0006631];indolebutyric acid metabolic process [GO:0080024];response to indolebutyric acid [GO:0080026];root hair elongation [GO:0048767]	cytosol [GO:0005829];peroxisome [GO:0005777]	oxidoreductase activity [GO:0016491]	+	20	20	20	69.3	69.3	69.3	26.765	0	165.73	30681000000	287	506850000	581840000	395080000	368110000	790940000	882090000	747080000	802730000	2055100000	1676400000	2485800000	2133300000	1127400000	1227900000	1291500000	1272500000	1462400000	773660000	1523800000	1679300000	1652000000	1759500000
+	1.94143	1.88425	3.6916	Q9LNK3	Q9LNK3	4596	F7P12.13	F12K21.25	Color2 [DarkGray]	1	4			integral component of membrane [GO:0016021];plasma membrane [GO:0005886]	ATP binding [GO:0005524];protein kinase activity [GO:0004672]	+	3	3	3	3.8	3.8	3.8	106.11	0.00094715	2.585	1188300000	17	9361600	0	5736700	11279000	24512000	10955000	23669000	22906000	89448000	45378000	84793000	78022000	67866000	100610000	64834000	36385000	49717000	50591000	49702000	35933000	93300000	83680000
+	3.7473	1.88317	3.68886	A0A1P8BGJ0	A0A1P8BGJ0	327	At5g17530	Phosphoglucosamine mutase family protein	Color2 [DarkGray]	1	4		carbohydrate metabolic process [GO:0005975]		intramolecular transferase activity, phosphotransferases [GO:0016868]	+	44	44	44	74	74	74	58.309	0	323.31	58738000000	605	1503400000	1872900000	1579300000	1481000000	1747700000	1840800000	1766400000	2016800000	3423100000	3063100000	3462500000	3147600000	1641800000	2148900000	2489900000	2619800000	2692600000	1814700000	2739000000	2681400000	3465300000	2929700000
+	3.8495	1.88269	3.68762	Q940S9	Q940S9	3392	At3g57890	AT3g57890/T10K17_100	Color2 [DarkGray]	1	4		cell morphogenesis [GO:0000902]			+	31	31	29	57.8	57.8	54.3	62.778	0	318.86	36178000000	347	2914100000	2966300000	2632900000	2384900000	3598000000	3379200000	3075000000	3094600000	929660000	920030000	995520000	950060000	750540000	760780000	846910000	852220000	577970000	347060000	724310000	453820000	849360000	874700000
+	5.80481	1.88112	3.68362	F4KD16	F4KD16	1046	At5g39160	Germin-like protein	Color2 [DarkGray]	1	4			apoplast [GO:0048046];cell wall [GO:0005618]	manganese ion binding [GO:0030145];nutrient reservoir activity [GO:0045735]	+	3	3	3	24.5	24.5	24.5	21.352	0	8.2068	1638800000	38	20470000	44002000	20321000	16926000	40392000	18485000	23698000	16793000	288290000	278530000	322990000	289950000	13270000	16132000	22974000	17514000	34886000	23858000	32366000	31856000	17307000	9971400
+	1.48927	1.87958	3.67969	Q8RWN5	Q8RWN5	2993	RZ1C	Glycine-rich RNA-binding protein RZ1C	Color2 [DarkGray]	1	4		negative regulation of transcription, DNA-templated [GO:0045892];positive regulation of mRNA splicing, via spliceosome [GO:0048026];regulation of RNA metabolic process [GO:0051252];response to cold [GO:0009409];response to water deprivation [GO:0009414]	nucleolus [GO:0005730];nucleus [GO:0005634];plasma membrane [GO:0005886];ribonucleoprotein complex [GO:1990904]	chromatin binding [GO:0003682];chromatin DNA binding [GO:0031490];mRNA binding [GO:0003729];nucleic acid binding [GO:0003676];RNA binding [GO:0003723];zinc ion binding [GO:0008270]	+	9	9	9	32.9	32.9	32.9	33.486	0	31.459	2418800000	42	213900000	242680000	166740000	177520000	420410000	332680000	365140000	298190000	36216000	29887000	29528000	18651000	2359600	5533400	2587200	26715000	6301300	6069600	3978800	17902000	2752100	6496300
+	2.35327	1.87947	3.67941	A0A1P8AM79	A0A1P8AM79	78	MNS3	alpha-1,2-Mannosidase	Color2 [DarkGray]	1	4		metabolic process [GO:0008152]	membrane [GO:0016020]	calcium ion binding [GO:0005509];mannosyl-oligosaccharide 1,2-alpha-mannosidase activity [GO:0004571]	+	12	12	12	18.9	18.9	18.9	71.07	0	40.694	3616200000	93	122630000	218950000	157690000	172130000	93517000	92889000	134600000	65835000	185000000	196930000	252770000	266790000	88322000	86565000	170190000	128400000	120100000	66990000	104020000	143710000	166110000	185910000
+	7.74693	1.87615	3.67094	Q93XW5	Q93XW5	3306	NSP5	Nitrile-specifier protein 5	Color2 [DarkGray]	1	4		glucosinolate catabolic process [GO:0019762];nitrile biosynthetic process [GO:0080028]	cytosol [GO:0005829];nucleus [GO:0005634];plastid [GO:0009536]	enzyme regulator activity [GO:0030234]	+	33	33	33	64.1	64.1	64.1	35.853	0	323.31	118790000000	641	4658000000	4862900000	3767400000	3669300000	3648000000	4063900000	3882600000	3881300000	15677000000	14731000000	19150000000	18935000000	1019900000	997250000	1270700000	1040300000	1972600000	1447800000	2394800000	2218700000	1258500000	1376000000
+	2.65086	1.87476	3.66742	Q8LE52	Q8LE52	2908	DHAR3	Glutathione S-transferase DHAR3, chloroplastic	Color2 [DarkGray]	1	4		protein glutathionylation [GO:0010731]	chloroplast [GO:0009507];chloroplast envelope [GO:0009941];chloroplast stroma [GO:0009570];plastid [GO:0009536]	glutathione dehydrogenase (ascorbate) activity [GO:0045174];glutathione transferase activity [GO:0004364]	+	31	31	31	70.5	70.5	70.5	28.514	0	277.21	47389000000	457	34003000	39716000	23826000	38419000	29489000	78761000	71881000	60933000	3361200000	3064600000	3452200000	3142900000	2364700000	2622500000	2462500000	2560800000	2606900000	1770200000	2491400000	2418000000	4134300000	3587700000
+	2.16724	1.87008	3.65554	Q84WW2	Q84WW2	2602	PGL3	6-phosphogluconolactonase 3, chloroplastic	Color2 [DarkGray]	1	4		carbohydrate metabolic process [GO:0005975];cellular response to redox state [GO:0071461];defense response to bacterium [GO:0042742];defense response to oomycetes [GO:0002229];nitrate assimilation [GO:0042128];pentose-phosphate shunt, oxidative branch [GO:0009051]	chloroplast [GO:0009507];chloroplast stroma [GO:0009570];cytoplasm [GO:0005737];peroxisome [GO:0005777];plastid [GO:0009536]	6-phosphogluconolactonase activity [GO:0017057]	+	25	25	25	70.2	70.2	70.2	35.644	0	191.3	52390000000	319	2962800000	3094100000	2337500000	2591300000	3944600000	3375100000	3149000000	3252600000	1948400000	1918100000	2201800000	1922800000	1089000000	1644000000	1462500000	1627400000	1500200000	1013700000	1491100000	1441800000	1855200000	1905900000
+	3.75646	1.86966	3.65447	Q9FXC0	Q9FXC0	4308	At1g56700	At1g56700	Color2 [DarkGray]	1	4		proteolysis [GO:0006508]	cytosol [GO:0005829]	pyroglutamyl-peptidase activity [GO:0016920]	+	17	16	16	84	78.5	78.5	24.046	0	176.99	8312400000	126	430360000	487920000	359150000	361630000	816400000	766040000	738040000	787650000	417610000	460340000	298400000	299910000	81248000	174280000	87454000	129460000	193670000	131060000	240140000	252590000	270280000	145200000
+	2.39981	1.86854	3.65163	Q9M1X0	Q9M1X0	4991	RRF	Ribosome-recycling factor, chloroplastic	Color2 [DarkGray]	1	4		chloroplast organization [GO:0009658];cytoplasmic translational termination [GO:0002184];defense response to bacterium [GO:0042742];defense response to fungus, incompatible interaction [GO:0009817];embryo development ending in seed dormancy [GO:0009793];plastid translation [GO:0032544];translation [GO:0006412]	chloroplast [GO:0009507];chloroplast stroma [GO:0009570];cytoplasm [GO:0005737];cytosol [GO:0005829];thylakoid [GO:0009579]	copper ion binding [GO:0005507];ribosomal large subunit binding [GO:0043023]	+	22	22	22	58.9	58.9	58.9	30.422	0	248.62	6738400000	114	0	18189000	10610000	0	28011000	16790000	20751000	19685000	1005100000	941160000	1122900000	911640000	164690000	167500000	127550000	123090000	285660000	227460000	279240000	267580000	303690000	253790000
+	2.42279	1.86842	3.65132	Q9C5R8	Q9C5R8	3688	At5g06290	2-Cys peroxiredoxin BAS1-like, chloroplastic	Color2 [DarkGray]	1	4		cell redox homeostasis [GO:0045454];defense response to bacterium [GO:0042742];response to cold [GO:0009409];response to oxidative stress [GO:0006979]	apoplast [GO:0048046];chloroplast [GO:0009507];chloroplast stroma [GO:0009570];plasma membrane [GO:0005886];stromule [GO:0010319]	peroxiredoxin activity [GO:0051920];thioredoxin peroxidase activity [GO:0008379]	+	23	13	13	59.3	28.2	28.2	29.78	0	323.31	61703000000	198	0	0	0	2663600	0	0	0	0	4746600000	5523500000	6414500000	5647000000	2686200000	2936900000	3088900000	2995500000	3349800000	2394000000	3507000000	3769500000	3971400000	3521800000
+	2.38497	1.86405	3.64028	Q945K7	Q945K7	3424	IDH5	Isocitrate dehydrogenase [NAD] catalytic subunit 5, mitochondrial	Color2 [DarkGray]	1	4		isocitrate metabolic process [GO:0006102];tricarboxylic acid cycle [GO:0006099]	mitochondrion [GO:0005739];plasma membrane [GO:0005886]	ATP binding [GO:0005524];isocitrate dehydrogenase (NAD+) activity [GO:0004449];magnesium ion binding [GO:0000287];NAD binding [GO:0051287];zinc ion binding [GO:0008270]	+	34	34	18	59.1	59.1	40.6	40.624	0	323.31	87500000000	653	4102100000	4678500000	3672100000	3309100000	8082800000	7767600000	7069700000	7506500000	2817800000	2559100000	3409100000	3093700000	1646800000	1983100000	2151900000	2172200000	2406800000	1451100000	2464300000	2563900000	3516600000	2940700000
+	1.89105	1.86351	3.63892	Q9FWR4	Q9FWR4	4286	DHAR1	Glutathione S-transferase DHAR1, mitochondrial	Color2 [DarkGray]	1	4		cellular response to hydrogen peroxide [GO:0070301];defense response [GO:0006952];positive regulation of salicylic acid mediated signaling pathway [GO:0080151];protein glutathionylation [GO:0010731];regulation of interspecies interactions between organisms [GO:0043903];regulation of ion transmembrane transport [GO:0034765];response to jasmonic acid [GO:0009753];response to ozone [GO:0010193];resp…	apoplast [GO:0048046];chloroplast [GO:0009507];chloroplast stroma [GO:0009570];cytosol [GO:0005829];mitochondrion [GO:0005739];nucleus [GO:0005634];peroxisome [GO:0005777];plasma membrane [GO:0005886];vacuole [GO:0005773]	copper ion binding [GO:0005507];glutathione dehydrogenase (ascorbate) activity [GO:0045174];glutathione transferase activity [GO:0004364];voltage-gated ion channel activity [GO:0005244]	+	38	38	38	99.5	99.5	99.5	23.641	0	323.31	268090000000	1076	6180000000	6417400000	4537000000	5114000000	11573000000	11650000000	13012000000	12747000000	14929000000	13316000000	14582000000	13234000000	7756800000	10412000000	11902000000	11897000000	11077000000	5780400000	10775000000	10463000000	15466000000	13615000000
+	6.28157	1.86269	3.63685	Q9LTX9	Q9LTX9	4728	HSP70-7	Heat shock 70 kDa protein 7, chloroplastic	Color2 [DarkGray]	1	4		cellular response to unfolded protein [GO:0034620];chaperone cofactor-dependent protein refolding [GO:0051085];protein refolding [GO:0042026];protein targeting to chloroplast [GO:0045036];response to cadmium ion [GO:0046686];response to heat [GO:0009408];response to unfolded protein [GO:0006986]	apoplast [GO:0048046];chloroplast [GO:0009507];chloroplast envelope [GO:0009941];chloroplast stroma [GO:0009570];cytoplasm [GO:0005737];plastid [GO:0009536];plastid stroma [GO:0009532];thylakoid [GO:0009579]	ATP binding [GO:0005524];ATPase activity [GO:0016887];heat shock protein binding [GO:0031072];misfolded protein binding [GO:0051787];protein folding chaperone [GO:0044183];unfolded protein binding [GO:0051082]	+	100	44	44	71	39.6	39.6	76.996	0	323.31	244120000000	1041	1930200000	2024800000	1612400000	1624500000	2277000000	2042100000	1950900000	2195300000	22442000000	18786000000	22120000000	19626000000	10248000000	11505000000	12993000000	12339000000	13914000000	9892400000	13740000000	13407000000	13180000000	12364000000
+	7.48464	1.86226	3.63577	Q9SCY0	Q9SCY0	5244	PGMP	Phosphoglucomutase, chloroplastic	Color2 [DarkGray]	1	4		carbohydrate metabolic process [GO:0005975];detection of gravity [GO:0009590];glucose metabolic process [GO:0006006];response to cold [GO:0009409];starch biosynthetic process [GO:0019252]	apoplast [GO:0048046];chloroplast [GO:0009507];chloroplast envelope [GO:0009941];chloroplast stroma [GO:0009570];cytosol [GO:0005829];stromule [GO:0010319]	magnesium ion binding [GO:0000287];phosphoglucomutase activity [GO:0004614]	+	56	56	56	73.2	73.2	73.2	67.988	0	323.31	131630000000	790	585310000	600730000	392830000	414320000	502110000	615390000	716230000	609790000	7860800000	8454600000	10045000000	10479000000	7513000000	8063400000	8516000000	8921100000	5811500000	2288500000	3694200000	3586900000	12301000000	9909900000
+	2.44761	1.86043	3.63115	F4JJR0	F4JJR0	873	VPS26B	Vacuolar protein sorting 26B	Color2 [DarkGray]	1	4		intracellular protein transport [GO:0006886]			+	17	17	8	60.7	60.7	28.7	32.108	0	133.83	7381300000	94	642580000	658260000	662100000	522240000	631130000	745560000	677390000	662100000	143190000	171440000	251100000	282240000	61930000	70078000	102730000	99902000	97613000	92922000	136080000	127440000	135320000	140300000
+	3.65137	1.8592	3.62806	Q9LVI8	Q9LVI8	4783	GLN1-3	Glutamine synthetase cytosolic isozyme 1-3	Color2 [DarkGray]	1	4		glutamine biosynthetic process [GO:0006542];nitrate assimilation [GO:0042128];response to cadmium ion [GO:0046686]	chloroplast [GO:0009507];cytoplasm [GO:0005737];cytosol [GO:0005829];cytosolic ribosome [GO:0022626];plasma membrane [GO:0005886];polysomal ribosome [GO:0042788]	ATP binding [GO:0005524];copper ion binding [GO:0005507];glutamate-ammonia ligase activity [GO:0004356];structural constituent of ribosome [GO:0003735]	+	45	45	33	84.2	84.2	71.8	38.594	0	323.31	318190000000	813	26557000000	35123000000	29324000000	27771000000	29753000000	29918000000	24768000000	27300000000	5706200000	5143500000	8712100000	7702800000	2911100000	3854100000	3914300000	3546200000	4955400000	2587000000	5108800000	7173000000	6184800000	6620600000
+	3.22078	1.85853	3.62637	Q9FKC0	Q9FKC0	4082	RPL13AD	60S ribosomal protein L13a-4	Color2 [DarkGray]	1	4		negative regulation of translation [GO:0017148];translation [GO:0006412]	cytosolic large ribosomal subunit [GO:0022625];cytosolic ribosome [GO:0022626];plastid [GO:0009536];ribosome [GO:0005840]	mRNA binding [GO:0003729];structural constituent of ribosome [GO:0003735]	+	25	9	9	75.2	25.7	25.7	23.59	0	28	3779200000	48	349140000	367600000	415800000	275910000	430620000	461920000	473780000	529600000	42266000	59438000	57410000	58717000	22848000	40208000	12848000	13683000	22327000	12775000	19515000	25400000	22548000	16324000
+	4.82163	1.85577	3.61946	Q9LDY2	Q9LDY2	4370	DIN4	2-oxoisovalerate dehydrogenase subunit beta 2, mitochondrial	Color2 [DarkGray]	1	4		branched-chain amino acid catabolic process [GO:0009083];cellular response to sucrose starvation [GO:0043617];response to absence of light [GO:0009646];response to nutrient [GO:0007584];response to sucrose [GO:0009744]	mitochondrial alpha-ketoglutarate dehydrogenase complex [GO:0005947];mitochondrion [GO:0005739]	3-methyl-2-oxobutanoate dehydrogenase (2-methylpropanoyl-transferring) activity [GO:0003863];alpha-ketoacid dehydrogenase activity [GO:0003826]	+	15	15	9	56.4	56.4	37.4	39.419	0	81.303	3689800000	60	61461000	74161000	42994000	60807000	83771000	81551000	68635000	66847000	796120000	507300000	633160000	531040000	32861000	62392000	62990000	44999000	120260000	61211000	58941000	79815000	48508000	34185000
+	2.69828	1.85547	3.6187	Q43870	Q43870	2323	APS2	ATP sulfurylase 2	Color2 [DarkGray]	1	4		cellular response to sulfate starvation [GO:0009970];hydrogen sulfide biosynthetic process [GO:0070814];sulfate assimilation [GO:0000103]	chloroplast [GO:0009507];chloroplast stroma [GO:0009570];cytosol [GO:0005829];nucleus [GO:0005634]	ATP binding [GO:0005524];sulfate adenylyltransferase (ATP) activity [GO:0004781]	+	36	28	28	53.4	46.8	46.8	53.638	0	118.71	10090000000	173	1065200000	1177600000	914870000	776080000	1540500000	1228600000	1354100000	1339200000	43376000	111980000	40715000	42148000	42112000	26795000	15651000	17004000	0	19884000	14258000	13630000	126230000	60322000
+	4.60637	1.85294	3.61235	Q8VZ49	Q8VZ49	3166	At1g64710	Alcohol dehydrogenase-like 4	Color2 [DarkGray]	1	4		formaldehyde catabolic process [GO:0046294]	cytosol [GO:0005829]	alcohol dehydrogenase activity, zinc-dependent [GO:0004024];S-(hydroxymethyl)glutathione dehydrogenase activity [GO:0051903];zinc ion binding [GO:0008270]	+	4	4	4	12.4	12.4	12.4	41.315	0	4.0622	443460000	6	0	0	0	0	0	0	0	0	24376000	27561000	12228000	8034000	32878000	60569000	11792000	34358000	9756200	0	0	0	67701000	37655000
+	7.57792	1.85242	3.61105	P93836	P93836	1999	HPD	4-hydroxyphenylpyruvate dioxygenase	Color2 [DarkGray]	1	4		L-phenylalanine catabolic process [GO:0006559];tyrosine catabolic process [GO:0006572]	cytosol [GO:0005829]	4-hydroxyphenylpyruvate dioxygenase activity [GO:0003868];identical protein binding [GO:0042802];metal ion binding [GO:0046872]	+	34	34	34	70.3	70.3	70.3	48.815	0	323.31	24573000000	331	624360000	708070000	454590000	591200000	338460000	283290000	240440000	268250000	3406800000	3246300000	3433700000	3177800000	385320000	437190000	406130000	358520000	884370000	642700000	998980000	1020200000	679800000	628870000
+	4.55365	1.85233	3.61083	Q9FEA2	Q9FEA2	3873	OVA3	Glutamate--tRNA ligase, chloroplastic/mitochondrial	Color2 [DarkGray]	1	4		chloroplast organization [GO:0009658];glutamyl-tRNA aminoacylation [GO:0006424];mitochondrion organization [GO:0007005];plant ovule development [GO:0048481]	chloroplast [GO:0009507];chloroplast stroma [GO:0009570];mitochondrion [GO:0005739];plastid [GO:0009536]	ATP binding [GO:0005524];glutamate-tRNA ligase activity [GO:0004818];tRNA binding [GO:0000049];zinc ion binding [GO:0008270]	+	29	29	29	53.3	53.3	53.3	63.465	0	154.68	18953000000	284	478690000	582930000	432330000	512170000	545400000	516400000	728210000	622970000	1006500000	811220000	1014300000	910590000	608130000	988560000	757620000	824540000	543460000	402330000	610880000	616080000	1208800000	1179100000
+	3.03177	1.85148	3.60871	P46422	P46422	1816	GSTF2	Glutathione S-transferase F2	Color2 [DarkGray]	1	4		auxin-activated signaling pathway [GO:0009734];defense response to bacterium [GO:0042742];glutathione metabolic process [GO:0006749];response to cadmium ion [GO:0046686];response to cold [GO:0009409];response to oomycetes [GO:0002239];response to zinc ion [GO:0010043];toxin catabolic process [GO:0009407]	apoplast [GO:0048046];chloroplast [GO:0009507];chloroplast stroma [GO:0009570];cytoplasm [GO:0005737];cytosol [GO:0005829];endoplasmic reticulum [GO:0005783];intracellular membrane-bounded organelle [GO:0043231];plasma membrane [GO:0005886];plasmodesma [GO:0009506];vacuole [GO:0005773]	camalexin binding [GO:2001147];glutathione binding [GO:0043295];glutathione transferase activity [GO:0004364];peroxidase activity [GO:0004601];protein domain specific binding [GO:0019904];quercitrin binding [GO:2001227]	+	27	24	24	96.2	96.2	96.2	24.128	0	323.31	51535000000	438	2276700000	1961100000	1511000000	1454900000	1525500000	1419300000	1292900000	1455100000	2927400000	2123100000	2789800000	2354300000	1701100000	2021300000	2090800000	1931400000	2267500000	1481300000	2112000000	2139100000	3774500000	3101700000
+	2.08541	1.8508	3.607	P29516	P29516	1706	TUBB8	Tubulin beta-8 chain	Color2 [DarkGray]	1	4		microtubule cytoskeleton organization [GO:0000226];microtubule-based process [GO:0007017];mitotic cell cycle [GO:0000278]	cytoplasm [GO:0005737];cytosol [GO:0005829];Golgi apparatus [GO:0005794];microtubule [GO:0005874];tubulin complex [GO:0045298]	GTP binding [GO:0005525];GTPase activity [GO:0003924];structural constituent of cytoskeleton [GO:0005200]	+	40	8	5	80.8	24.9	13.1	50.606	0	323.31	51216000000	148	6162100000	6707600000	5318600000	5661000000	6831300000	6830000000	6513900000	6652600000	33202000	33028000	52152000	41895000	26142000	33129000	46753000	44113000	16675000	0	0	20673000	50365000	52248000
+	1.36557	1.85065	3.60663	Q9ZSD4	Q9ZSD4	5920	SYP121	Syntaxin-121	Color2 [DarkGray]	1	4		defense response [GO:0006952];defense response to fungus [GO:0050832];exocytosis [GO:0006887];intracellular protein transport [GO:0006886];maintenance of protein location in plasma membrane [GO:0072660];negative regulation of defense response [GO:0031348];protein targeting to membrane [GO:0006612];regulation of stomatal movement [GO:0010119];response to abscisic acid [GO:0009737];response to fung…	cell plate [GO:0009504];cytosol [GO:0005829];endomembrane system [GO:0012505];integral component of membrane [GO:0016021];plasma membrane [GO:0005886];plasmodesma [GO:0009506];SNARE complex [GO:0031201];trans-Golgi network [GO:0005802]	protein-membrane adaptor activity [GO:0043495];SNAP receptor activity [GO:0005484];SNARE binding [GO:0000149]	+	6	6	6	23.4	23.4	23.4	37.956	0	20.646	951260000	33	105120000	113230000	98560000	89126000	110560000	88595000	109380000	109190000	13757000	10802000	23747000	32997000	9362800	7081700	0	0	6738700	0	0	3058400	6657400	8274400
+	3.07567	1.85026	3.60566	Q8RXU4	Q8RXU4	3047	THA1	Probable low-specificity L-threonine aldolase 1	Color2 [DarkGray]	1	4		glycine biosynthetic process [GO:0006545];threonine catabolic process [GO:0006567]	cytosol [GO:0005829]	L-allo-threonine aldolase activity [GO:0008732];threonine aldolase activity [GO:0004793]	+	13	13	13	45.5	45.5	45.5	38.942	0	163.17	2452200000	35	10418000	0	0	0	0	0	0	0	518640000	466660000	683890000	638090000	10510000	59460000	0	11047000	12092000	8383800	16062000	0	8764200	0
+	1.55335	1.84863	3.60157	F4KI56	F4KI56	1064	IPSP	Metal-independent phosphoserine phosphatase	Color2 [DarkGray]	1	4		D-serine biosynthetic process [GO:0070179];L-serine biosynthetic process [GO:0006564]		phosphatase activity [GO:0016791];phosphoserine phosphatase activity [GO:0004647]	+	21	21	21	69.3	69.3	69.3	26.474	0	79.614	4822700000	75	408040000	527660000	527890000	480110000	546490000	790710000	588460000	620610000	24426000	36432000	24409000	29265000	2973000	4202400	26307000	27970000	0	0	0	26826000	21610000	27748000
+	3.19831	1.84856	3.6014	O80472	O80472	1438	MES7	Methylesterase 7	Color2 [DarkGray]	1	4		defense response to fungus, incompatible interaction [GO:0009817];jasmonic acid metabolic process [GO:0009694];salicylic acid metabolic process [GO:0009696];systemic acquired resistance [GO:0009627]		hydrolase activity [GO:0016787];hydrolase activity, acting on ester bonds [GO:0016788];methyl indole-3-acetate esterase activity [GO:0080030];methyl jasmonate esterase activity [GO:0080032];methyl salicylate esterase activity [GO:0080031]	+	6	5	5	34.6	30.8	30.8	28.823	0	22.502	604220000	9	68099000	87310000	51214000	33826000	92820000	63409000	44141000	62696000	27380000	7157500	19234000	39168000	0	0	0	7762600	0	0	0	0	0	0
+	7.50041	1.84827	3.60067	Q96329	Q96329	3609	ACX4	Acyl-coenzyme A oxidase 4, peroxisomal	Color2 [DarkGray]	1	4		embryo development ending in seed dormancy [GO:0009793];fatty acid beta-oxidation [GO:0006635];short-chain fatty acid metabolic process [GO:0046459]	cytosol [GO:0005829];glyoxysome [GO:0009514];peroxisome [GO:0005777]	acyl-CoA dehydrogenase activity [GO:0003995];acyl-CoA oxidase activity [GO:0003997];flavin adenine dinucleotide binding [GO:0050660]	+	32	32	32	63.8	63.8	63.8	47.556	0	323.31	44760000000	425	1586800000	1799400000	1236700000	1256800000	1965800000	1934700000	2060800000	2074900000	5173800000	4482200000	4950200000	4569600000	797110000	907060000	677510000	665800000	1195300000	932540000	1074300000	1241100000	1064100000	988680000
+	3.36148	1.84812	3.6003	Q9LE22	Q9LE22	4375	CML27	Probable calcium-binding protein CML27	Color2 [DarkGray]	1	4			cytosol [GO:0005829];nucleus [GO:0005634];plasma membrane [GO:0005886];vacuole [GO:0005773]	calcium ion binding [GO:0005509]	+	9	9	9	68.2	68.2	68.2	18.35	0	52.276	4401900000	93	96567000	131840000	95205000	48478000	355750000	418710000	445170000	405740000	206350000	321720000	259830000	242990000	89405000	81673000	82932000	114750000	82249000	105570000	124910000	128850000	121130000	160070000
+	1.96698	1.84793	3.59984	Q8LEK4	Q8LEK4	2915	At4g26160	Thioredoxin-like 2-1, chloroplastic	Color2 [DarkGray]	1	4		cell redox homeostasis [GO:0045454];detection of redox state [GO:0051776];regulation of photosynthesis [GO:0010109]	chloroplast [GO:0009507];chloroplast stroma [GO:0009570]	oxidoreductase activity, acting on a sulfur group of donors, disulfide as acceptor [GO:0016671]	+	2	2	2	11.3	11.3	11.3	24.352	0	5.941	248290000	14	0	3755400	0	0	0	0	0	0	23410000	20711000	30107000	19435000	6871400	4833100	14283000	13658000	10368000	6509800	15108000	9394600	14940000	18514000
+	6.56174	1.8474	3.59851	O49304	O49304	1316	At1g23130	At1g23130/T26J12_10	Color2 [DarkGray]	1	4		defense response [GO:0006952]	cytosol [GO:0005829];nucleus [GO:0005634]		+	25	25	24	84.4	84.4	84.4	17.859	0	198.22	56482000000	349	304040000	293120000	296710000	226430000	325520000	318960000	228280000	278060000	3652300000	3312100000	3676500000	3432700000	2961600000	4000600000	4323700000	4075900000	1223800000	788350000	1401600000	1235400000	5575200000	4826000000
+	3.2991	1.84535	3.59341	O82089	O82089	1552	CCH	Copper transport protein CCH	Color2 [DarkGray]	1	4		cellular copper ion homeostasis [GO:0006878];copper ion transport [GO:0006825];response to cadmium ion [GO:0046686]	chloroplast [GO:0009507];cytosol [GO:0005829]	copper chaperone activity [GO:0016531];protein domain specific binding [GO:0019904]	+	28	28	2	99.2	99.2	17.4	12.971	0	323.31	48826000000	376	3272400000	3366300000	2925900000	2928500000	5152600000	6031200000	6359100000	6112700000	1146200000	1149200000	1061000000	1095000000	399140000	605880000	563110000	681850000	732050000	446890000	778850000	729990000	862880000	789850000
+	2.08723	1.84456	3.59143	Q9SUU6	Q9SUU6	5668	At4g32460	Uncharacterized protein AT4g32460	Color2 [DarkGray]	1	4					+	4	1	1	9.2	4	4	35.293	0	5.7547	512740000	11	16272000	15604000	11976000	14932000	39292000	0	27667000	21331000	65165000	56336000	66098000	53026000	11091000	0	14763000	13492000	8796100	0	11556000	21391000	0	10222000
+	2.98637	1.84309	3.58777	O80763	O80763	1475	At1g60420	Probable nucleoredoxin 1	Color2 [DarkGray]	1	4		cell redox homeostasis [GO:0045454];pollen tube growth [GO:0009860];pollen tube guidance [GO:0010183];regulation of pollen tube growth [GO:0080092];response to cadmium ion [GO:0046686]	cytosol [GO:0005829];nucleus [GO:0005634]	protein-disulfide reductase activity [GO:0047134]	+	56	56	56	72	72	72	65.169	0	323.31	58835000000	746	4456100000	4107200000	3794400000	3651600000	4768400000	4825000000	4518500000	4686600000	1570600000	1532600000	1869200000	1770800000	984820000	1265300000	1497100000	1323500000	1174300000	902240000	1255400000	1283900000	2022200000	1925900000
+	2.61111	1.83983	3.57968	Q9FZC7	Q9FZC7	4346	FOX4	Berberine bridge enzyme-like 6	Color2 [DarkGray]	1	4		cellular response to hypoxia [GO:0071456]	cell wall [GO:0005618];extracellular region [GO:0005576]	FAD binding [GO:0071949];oxidoreductase activity [GO:0016491]	+	9	2	2	13	2.9	2.9	61.484	1	-2	1785000000	2	0	0	0	0	0	0	0	0	206860000	316260000	402370000	379330000	26790000	23125000	155060000	25007000	29884000	41047000	36316000	48128000	16966000	29163000
+	3.70305	1.8385	3.57638	F4J9K9	F4J9K9	809	At3g05900	Neurofilament protein-like protein	Color2 [DarkGray]	1	4			cytosol [GO:0005829]		+	51	51	51	77.3	77.3	77.3	73.453	0	257.23	12909000000	195	2620900000	1221800000	1112100000	1103800000	1130100000	1434600000	1240700000	1263300000	333130000	434050000	403110000	276600000	36569000	25391000	16440000	38429000	32582000	24246000	42949000	24124000	27171000	35923000
+	5.28387	1.838	3.57515	O48782	O48782	1293	HO1	Heme oxygenase 1, chloroplastic	Color2 [DarkGray]	1	4		carotenoid biosynthetic process [GO:0016117];cellular response to UV-C [GO:0071494];chloroplast-nucleus signaling pathway [GO:0010019];flavonoid biosynthetic process [GO:0009813];heme oxidation [GO:0006788];photosynthesis [GO:0015979];phytochromobilin biosynthetic process [GO:0010024];regulation of meristem growth [GO:0010075];regulation of stomatal movement [GO:0010119]	chloroplast [GO:0009507]	heme binding [GO:0020037];heme oxygenase (decyclizing) activity [GO:0004392];metal ion binding [GO:0046872]	+	17	17	17	55.3	55.3	55.3	32.691	0	30.639	4565300000	94	75827000	89065000	64367000	44135000	68428000	87027000	73177000	102940000	442350000	317830000	547210000	413980000	194950000	156640000	172560000	123710000	226700000	140790000	193380000	255780000	200020000	165180000
+	2.13483	1.8374	3.57365	Q9SMV6	Q9SMV6	5491	XPO1	Protein EXPORTIN 1A	Color2 [DarkGray]	1	4		embryo sac development [GO:0009553];mRNA transport [GO:0051028];pollen development [GO:0009555];pollen germination [GO:0009846];pollen tube growth [GO:0009860];protein export from nucleus [GO:0006611];regulation of protein export from nucleus [GO:0046825];response to heat [GO:0009408];ribosomal large subunit export from nucleus [GO:0000055];ribosomal small subunit export from nucleus [GO:0000056]	cytoplasm [GO:0005737];cytosol [GO:0005829];nuclear membrane [GO:0031965];nuclear pore [GO:0005643];nucleus [GO:0005634]	nuclear export signal receptor activity [GO:0005049];Ran GTPase binding [GO:0008536]	+	44	44	29	39.6	39.6	29.7	123.24	0	208.99	24708000000	296	2234400000	2114100000	2290800000	1999300000	2273000000	2590600000	2553500000	2828700000	473100000	495380000	556800000	567870000	149550000	375950000	314410000	96165000	391010000	43630000	400840000	406040000	243480000	508910000
+	3.67769	1.8372	3.57317	Q9C9C4	Q9C9C4	3799	ENO1	Enolase 1, chloroplastic	Color2 [DarkGray]	1	4		glycolytic process [GO:0006096];regulation of vacuole fusion, non-autophagic [GO:0032889];trichome morphogenesis [GO:0010090]	chloroplast [GO:0009507];chloroplast stroma [GO:0009570];phosphopyruvate hydratase complex [GO:0000015]	magnesium ion binding [GO:0000287];phosphopyruvate hydratase activity [GO:0004634]	+	44	43	43	66	66	66	51.474	0	323.31	82908000000	596	8642100000	10209000000	7891000000	8455800000	8695200000	9244900000	8725000000	10119000000	711370000	675940000	1073300000	1057400000	391620000	476930000	337780000	522020000	652080000	497480000	575350000	688280000	796960000	749460000
+	1.67136	1.83445	3.56636	Q9SJ81	Q9SJ81	5394	FLA7	Fasciclin-like arabinogalactan protein 7	Color2 [DarkGray]	1	4		plant-type secondary cell wall biogenesis [GO:0009834]	anchored component of membrane [GO:0031225];anchored component of plasma membrane [GO:0046658];mitochondrion [GO:0005739];plasma membrane [GO:0005886];secretory vesicle [GO:0099503]		+	7	7	7	26	26	26	26.845	0	116.36	12767000000	113	926220000	859060000	614290000	596000000	884400000	688360000	717380000	787620000	641390000	865650000	571540000	601900000	360610000	344790000	354750000	355210000	454820000	295510000	404100000	380200000	201800000	327340000
+	3.52101	1.82956	3.55429	O22468	O22468	1145	MSI2	WD-40 repeat-containing protein MSI2	Color2 [DarkGray]	1	4		chromatin organization [GO:0006325]	Cul4-RING E3 ubiquitin ligase complex [GO:0080008];cytosol [GO:0005829];nucleus [GO:0005634]		+	14	14	11	46.5	46.5	38.3	46.703	0	41.851	7632300000	138	671990000	759530000	703000000	521920000	505280000	853720000	695000000	866630000	133280000	113430000	131400000	170690000	216250000	79189000	118480000	79550000	81024000	60023000	50501000	75340000	160410000	180920000
+	2.01569	1.82703	3.54805	Q9LXB5	Q9LXB5	4830	FLP2	Flowering-promoting factor 1-like protein 2	Color2 [DarkGray]	1	4		regulation of flower development [GO:0009909];vegetative to reproductive phase transition of meristem [GO:0010228]			+	3	3	3	26.8	26.8	26.8	12.792	0	3.1904	278390000	9	57712000	66637000	28361000	14609000	15753000	19051000	19697000	19788000	5940900	9387900	12508000	8940500	0	0	0	0	0	0	0	0	0	0
+	2.37376	1.82595	3.54541	A0A1I9LN01	A0A1I9LN01	33	LAF3	Protein LONG AFTER FAR-RED 3	Color2 [DarkGray]	1	4		de-etiolation [GO:0009704];response to far red light [GO:0010218];seed germination [GO:0009845]	integral component of membrane [GO:0016021];perinuclear region of cytoplasm [GO:0048471]	hydrolase activity, acting on carbon-nitrogen (but not peptide) bonds [GO:0016810]	+	3	3	3	7.5	7.5	7.5	63.784	0.0054093	1.7957	724430000	5	2151700	9896000	0	2735500	2518100	0	2961200	0	37125000	52273000	54077000	5726100	1070300	39653000	43144000	1856100	78595000	1362900	83520000	80611000	48780000	57165000
+	3.11767	1.82507	3.54324	O22941;A0A1I9LPB3	O22941	1187	PXM16	Insulin-degrading enzyme-like 1, peroxisomal	Color2 [DarkGray]	1	4		peptide catabolic process [GO:0043171];proteolysis involved in cellular protein catabolic process [GO:0051603]	cytosol [GO:0005829];mitochondrion [GO:0005739];peroxisome [GO:0005777]	metal ion binding [GO:0046872];metalloendopeptidase activity [GO:0004222]	+	57	57	57	54	54	54	110.99	0	286.2	22696000000	413	2378200000	2509300000	2108100000	1808300000	2176100000	2411500000	2419100000	2524400000	315620000	259490000	354060000	278350000	205150000	337340000	107360000	138790000	121390000	51501000	92950000	100310000	513970000	620810000
+	2.26071	1.82351	3.53942	Q9ZP06	Q9ZP06	5876	At1g53240	Malate dehydrogenase 1, mitochondrial	Color2 [DarkGray]	1	4		carbohydrate metabolic process [GO:0005975];defense response to bacterium [GO:0042742];malate metabolic process [GO:0006108];response to cadmium ion [GO:0046686];response to cold [GO:0009409];tricarboxylic acid cycle [GO:0006099]	cell wall [GO:0005618];chloroplast [GO:0009507];cytoplasm [GO:0005737];mitochondrial matrix [GO:0005759];mitochondrion [GO:0005739];nucleus [GO:0005634]	copper ion binding [GO:0005507];L-malate dehydrogenase activity [GO:0030060]	+	35	33	18	80.4	80.4	56.6	35.804	0	323.31	400580000000	1169	14128000000	15475000000	12217000000	10743000000	17157000000	15780000000	16527000000	16212000000	21567000000	15924000000	22840000000	20089000000	11372000000	12839000000	14066000000	13066000000	18267000000	13409000000	18751000000	15574000000	22443000000	21096000000
+	4.64228	1.82317	3.53857	Q56ZI2	Q56ZI2	2358	PATL2	Patellin-2	Color2 [DarkGray]	1	4		cell cycle [GO:0007049];cell division [GO:0051301];cellular response to auxin stimulus [GO:0071365];protein localization involved in auxin polar transport [GO:1901703]	Golgi apparatus [GO:0005794];nucleus [GO:0005634];plasma membrane [GO:0005886]	lipid binding [GO:0008289];protease binding [GO:0002020]	+	129	129	125	94.4	94.4	93	76.007	0	323.31	242740000000	2324	17575000000	19131000000	14492000000	14366000000	11333000000	12184000000	11467000000	12471000000	11047000000	11094000000	12775000000	11331000000	5390800000	6492900000	6101600000	6621000000	7937000000	5779900000	7408600000	7854800000	7866300000	7584000000
+	1.82074	1.82211	3.53597	O82314	O82314	1575	At2g25830	Probable transcriptional regulatory protein At2g25830	Color2 [DarkGray]	1	4			chloroplast [GO:0009507];vacuole [GO:0005773]		+	16	16	16	30.5	30.5	30.5	36.813	0	89.101	6170300000	102	14014000	12890000	19076000	5034300	15872000	15681000	26087000	21102000	633480000	520240000	620340000	535430000	253410000	260890000	244020000	247770000	309390000	249970000	331560000	289640000	371370000	414310000
+	3.20772	1.82064	3.53237	Q9SA96	Q9SA96	5195	ADT1	Arogenate dehydratase/prephenate dehydratase 1, chloroplastic	Color2 [DarkGray]	1	4		L-phenylalanine biosynthetic process [GO:0009094]	chloroplast [GO:0009507];chloroplast stroma [GO:0009570];cytoplasm [GO:0005737]	arogenate dehydratase activity [GO:0047769];prephenate dehydratase activity [GO:0004664]	+	9	7	7	32.1	26.3	26.3	43.604	0	23.608	1277800000	22	429000000	105320000	54229000	59468000	45556000	382740000	84311000	75593000	3643800	4765900	26876000	6328700	0	0	0	0	0	0	0	0	0	0
+	2.19275	1.81935	3.52921	A0A1P8AZK1	A0A1P8AZK1	185	HEMD	Uroporphyrinogen-III synthase	Color2 [DarkGray]	1	4		protoporphyrinogen IX biosynthetic process [GO:0006782];uroporphyrinogen III biosynthetic process [GO:0006780]		uroporphyrinogen-III synthase activity [GO:0004852]	+	24	24	24	53.2	53.2	53.2	31.884	0	233.65	55491000000	251	2182900000	1871900000	1766800000	2134400000	1766500000	2217000000	1646300000	1692700000	2529800000	2835300000	2834200000	2691400000	2216800000	2130000000	2117700000	2359700000	2315400000	2200600000	2186900000	2633500000	2509100000	2587900000
+	1.3982	1.81893	3.5282	F4HUK6	F4HUK6	555	AAE1	Probable acyl-activating enzyme 1, peroxisomal	Color2 [DarkGray]	1	4		fatty acid metabolic process [GO:0006631]	peroxisome [GO:0005777]	ligase activity [GO:0016874]	+	8	8	8	16.5	16.5	16.5	61.073	0	7.277	1417500000	32	243270000	121170000	132790000	214530000	106920000	160360000	88412000	117680000	20367000	10147000	26576000	30625000	18824000	15218000	14935000	27420000	12385000	0	15675000	0	15395000	5060600
+	2.15622	1.81893	3.52818	Q9SR43	Q9SR43	5540	HY2	Phytochromobilin:ferredoxin oxidoreductase, chloroplastic	Color2 [DarkGray]	1	4		chloroplast-nucleus signaling pathway [GO:0010019];phytochromobilin biosynthetic process [GO:0010024]	chloroplast [GO:0009507]	cobalt ion binding [GO:0050897];phytochromobilin:ferredoxin oxidoreductase activity [GO:0050619]	+	7	7	7	17	17	17	38.129	0	10.333	1111600000	43	0	10390000	0	0	0	0	0	6020700	62290000	74875000	86213000	87760000	46281000	73694000	64567000	60558000	49585000	31614000	40315000	46430000	107910000	78535000
+	1.99236	1.81875	3.52775	Q9M9E8	Q9M9E8	5082	At1g78280	F-box protein At1g78280	Color2 [DarkGray]	1	4			cytosol [GO:0005829]		+	9	9	9	10	10	10	108.5	0	12.918	2013600000	44	162430000	112340000	154510000	176650000	228250000	202770000	177900000	216120000	70576000	37064000	47283000	73870000	17066000	37788000	46950000	16531000	23948000	18693000	19405000	40729000	45923000	28900000
+	3.45073	1.8163	3.52177	Q9LIR6	Q9LIR6	4496	BAM1	Beta-amylase 1, chloroplastic	Color2 [DarkGray]	1	4		response to water deprivation [GO:0009414];starch catabolic process [GO:0005983]	chloroplast [GO:0009507];cytosol [GO:0005829];nucleus [GO:0005634]	amylopectin maltohydrolase activity [GO:0102229];beta-amylase activity [GO:0016161]	+	28	28	28	54.4	54.4	54.4	63.762	0	257.66	12352000000	317	609450000	683640000	612000000	636550000	848440000	760760000	735300000	704940000	635810000	556890000	709490000	705810000	230760000	298930000	336030000	332430000	352140000	237510000	418470000	392730000	410100000	345370000
+	4.24433	1.81446	3.51729	Q9LZ23	Q9LZ23	4886	ACR12	ACT domain-containing protein ACR12	Color2 [DarkGray]	1	4			chloroplast [GO:0009507];chloroplast stroma [GO:0009570];chloroplast thylakoid membrane [GO:0009535];plasma membrane [GO:0005886]		+	21	21	21	56.8	56.8	56.8	33.242	0	323.31	45220000000	428	3141400000	3971700000	3445900000	3474500000	4319000000	4515500000	4215800000	4220900000	920010000	742690000	1232300000	1123000000	661640000	735510000	567870000	760100000	701190000	644320000	692710000	882590000	977940000	1026500000
+	3.2799	1.81372	3.51548	Q9LJ65	Q9LJ65	4498	At3g19010	2-oxoglutarate (2OG) and Fe(II)-dependent oxygenase superfamily protein	Color2 [DarkGray]	1	4			cytosol [GO:0005829]	dioxygenase activity [GO:0051213];metal ion binding [GO:0046872]	+	30	30	30	77.9	77.9	77.9	40.696	0	323.31	25444000000	398	581230000	663750000	429050000	514250000	1101700000	891530000	966750000	876850000	1825100000	1351700000	1718300000	1462400000	813110000	934530000	870200000	967800000	971760000	860900000	1191700000	1093500000	1353300000	1187600000
+	4.93068	1.81103	3.50892	Q9LQF2	Q9LQF2	4634	CINV1	Alkaline/neutral invertase CINV1	Color2 [DarkGray]	1	4		carbohydrate metabolic process [GO:0005975];cellular amino acid metabolic process [GO:0006520];response to hydrogen peroxide [GO:0042542];root development [GO:0048364];sucrose catabolic process [GO:0005987]	chloroplast [GO:0009507];cytosol [GO:0005829];membrane [GO:0016020];nucleus [GO:0005634];plasma membrane [GO:0005886]	beta-fructofuranosidase activity [GO:0004564];glycopeptide alpha-N-acetylgalactosaminidase activity [GO:0033926];sucrose alpha-glucosidase activity [GO:0004575]	+	37	37	26	60.6	60.6	49.4	62.834	0	323.31	45426000000	466	3576700000	4391000000	3233100000	3150600000	5442100000	5369100000	5322600000	5702500000	1082300000	1030000000	1139400000	974720000	304240000	368290000	245460000	266290000	481550000	273570000	411120000	454820000	572680000	453520000
+	5.73715	1.8091	3.50424	Q39241	Q39241	2219	TRX5	Thioredoxin H5	Color2 [DarkGray]	1	4		cell redox homeostasis [GO:0045454];defense response to fungus [GO:0050832];response to cadmium ion [GO:0046686];response to microbial phytotoxin [GO:0010188];response to oxidative stress [GO:0006979]	cytosol [GO:0005829];nucleus [GO:0005634];plasma membrane [GO:0005886];plasmodesma [GO:0009506]	oxidoreductase activity, acting on a sulfur group of donors, disulfide as acceptor [GO:0016671]	+	18	18	17	98.3	98.3	85.6	13.122	0	285.1	35764000000	294	2182900000	2224500000	1597300000	1569800000	3593700000	2934400000	3061000000	3574500000	1932700000	1889300000	2115000000	1820000000	487840000	564070000	482910000	630640000	730590000	604620000	813600000	841050000	553400000	539580000
+	1.55425	1.8073	3.49987	P21218	P21218	1658	PORB	Protochlorophyllide reductase B, chloroplastic	Color2 [DarkGray]	1	4		chlorophyll biosynthetic process [GO:0015995];photosynthesis [GO:0015979];response to ethylene [GO:0009723]	chloroplast [GO:0009507];chloroplast envelope [GO:0009941];chloroplast outer membrane [GO:0009707];chloroplast thylakoid [GO:0009534];chloroplast thylakoid membrane [GO:0009535];cytosol [GO:0005829]	protein domain specific binding [GO:0019904];protochlorophyllide reductase activity [GO:0016630]	+	44	44	38	80	80	74.8	43.359	0	323.31	87153000000	624	355980000	287330000	69697000	14748000	23546000	9294300	0	39946000	8302500000	8389900000	8859300000	7457000000	3476800000	4348300000	4490900000	4075200000	5855100000	3556400000	5502400000	5119500000	4241000000	4198300000
+	6.5657	1.80511	3.49455	Q9FFE6	Q9FFE6	3893	AAE5	Probable acyl-activating enzyme 5, peroxisomal	Color2 [DarkGray]	1	4		fatty acid metabolic process [GO:0006631]	peroxisome [GO:0005777]	ligase activity [GO:0016874]	+	27	27	27	42.8	42.8	42.8	60.769	0	209.46	14902000000	213	262230000	259800000	215840000	237810000	360620000	445300000	346420000	292150000	2064800000	1809300000	2297500000	1808800000	194860000	289900000	535490000	360800000	514240000	263380000	656190000	471240000	312380000	333590000
+	2.55511	1.80363	3.49097	Q9ZPY7	Q9ZPY7	5889	CAS	Exportin-2	Color2 [DarkGray]	1	4		protein export from nucleus [GO:0006611];protein import into nucleus [GO:0006606]	cytosol [GO:0005829];nuclear envelope [GO:0005635];plasmodesma [GO:0009506]	nuclear export signal receptor activity [GO:0005049];Ran GTPase binding [GO:0008536]	+	59	59	59	54.2	54.2	54.2	108.66	0	323.31	35614000000	322	4577200000	4147900000	3574700000	3381200000	4606000000	4471000000	4458900000	4572800000	79711000	139220000	174400000	102030000	65418000	53292000	68377000	61894000	0	0	17016000	13341000	241020000	232170000
+	4.62477	1.80347	3.4906	Q9FFR3	Q9FFR3	3912	PGD3	6-phosphogluconate dehydrogenase, decarboxylating 3, chloroplastic	Color2 [DarkGray]	1	4		D-gluconate catabolic process [GO:0046177];pentose-phosphate shunt, oxidative branch [GO:0009051];response to cadmium ion [GO:0046686];response to fructose [GO:0009750];response to glucose [GO:0009749];response to sucrose [GO:0009744]	chloroplast [GO:0009507];chloroplast stroma [GO:0009570];cytosol [GO:0005829];mitochondrion [GO:0005739];plasmodesma [GO:0009506];plastid [GO:0009536];secretory vesicle [GO:0099503]	NADP binding [GO:0050661];phosphogluconate 2-dehydrogenase activity [GO:0008114];phosphogluconate dehydrogenase (decarboxylating) activity [GO:0004616]	+	59	56	34	90.3	87.3	54.6	53.317	0	323.31	212940000000	847	21813000000	21782000000	18592000000	17124000000	21924000000	23555000000	22372000000	22684000000	2897600000	2776700000	3428100000	3399300000	1962300000	1986000000	2410300000	2143800000	1103700000	783170000	1127400000	1232200000	4235500000	4594400000
+	1.73766	1.80319	3.48991	Q0WR30;Q9LME7	Q0WR30;Q9LME7	2074	At1g78260;At1g22330	RNA-binding (RRM/RBD/RNP motifs) family protein	Color2 [DarkGray]	1	4			integral component of membrane [GO:0016021];nucleus [GO:0005634]	mRNA binding [GO:0003729]	+	7	7	5	18.5	18.5	14.8	30.334	0	68.9	3994900000	54	274120000	280450000	270390000	260300000	542240000	425270000	424320000	489180000	98883000	68047000	47477000	74310000	108290000	133910000	47077000	140370000	28006000	108980000	11217000	26419000	37080000	29480000
+	2.6812	1.79931	3.48054	Q94CD5	Q94CD5	3529	ATG7	Ubiquitin-like modifier-activating enzyme atg7	Color2 [DarkGray]	1	4		autophagosome assembly [GO:0000045];autophagy [GO:0006914];autophagy of mitochondrion [GO:0000422];cellular response to nitrogen starvation [GO:0006995];C-terminal protein lipidation [GO:0006501];defense response to fungus [GO:0050832];late nucleophagy [GO:0044805];leaf senescence [GO:0010150];piecemeal microautophagy of the nucleus [GO:0034727];protein lipidation [GO:0006497];protein modificatio…	cytoplasm [GO:0005737];cytosol [GO:0005829];phagophore assembly site [GO:0000407]	Atg12 activating enzyme activity [GO:0019778];Atg8 activating enzyme activity [GO:0019779]	+	17	17	17	37.3	37.3	37.3	76.521	0	45.365	2818800000	60	230320000	163560000	147770000	161690000	278430000	249620000	186130000	194600000	120640000	147200000	200790000	84946000	39683000	45107000	57053000	64292000	39434000	48928000	56803000	44874000	72635000	37932000
+	2.84073	1.79623	3.47311	Q8S9M1	Q8S9M1	3083	PAP13	Probable plastid-lipid-associated protein 13, chloroplastic	Color2 [DarkGray]	1	4			chloroplast [GO:0009507];chloroplast stroma [GO:0009570];chloroplast thylakoid [GO:0009534];cytosol [GO:0005829];plastoglobule [GO:0010287];thylakoid [GO:0009579]		+	22	22	22	58.9	58.9	58.9	32.986	0	146.35	13276000000	187	9727300	12130000	7818900	0	9161600	0	8408700	0	1325000000	1281700000	1417700000	1277500000	452630000	604810000	654900000	668070000	723300000	491760000	576060000	643400000	800520000	745940000
+	4.35502	1.79523	3.4707	Q9LVL9	Q9LVL9	4790	MES18	Methylesterase 18	Color2 [DarkGray]	1	4		jasmonic acid metabolic process [GO:0009694];salicylic acid metabolic process [GO:0009696]		hydrolase activity [GO:0016787];hydrolase activity, acting on ester bonds [GO:0016788];methyl indole-3-acetate esterase activity [GO:0080030];methyl jasmonate esterase activity [GO:0080032];methyl salicylate esterase activity [GO:0080031]	+	5	5	5	22.8	22.8	22.8	29.092	0	15.975	1407700000	54	0	0	0	0	0	0	0	0	143660000	159100000	107670000	93190000	55379000	51154000	79092000	73788000	94103000	70798000	86821000	91752000	64861000	73609000
+	3.13314	1.79517	3.47056	O81299	O81299	1527	At4g02340	AT4g02340 protein	Color2 [DarkGray]	1	4			peroxisome [GO:0005777]	hydrolase activity [GO:0016787]	+	16	16	16	56.8	56.8	56.8	36.656	0	71.618	5820800000	118	460210000	490690000	389500000	363720000	593230000	600850000	420490000	488490000	116080000	150930000	143140000	110150000	93506000	140050000	118330000	149480000	38081000	15497000	32156000	73817000	227380000	178530000
+	1.94851	1.79465	3.46931	Q9CA40	Q9CA40	3827	NUDT1	Nudix hydrolase 1	Color2 [DarkGray]	1	4		cellular response to DNA damage stimulus [GO:0006974];dGTP catabolic process [GO:0006203]	cytosol [GO:0005829]	8-oxo-7,8-dihydrodeoxyguanosine triphosphate pyrophosphatase activity [GO:0035539];8-oxo-7,8-dihydroguanosine triphosphate pyrophosphatase activity [GO:0008413];dihydroneopterin triphosphate pyrophosphohydrolase activity [GO:0019177];metal ion binding [GO:0046872];NAD+ diphosphatase activity [GO:0000210]	+	6	6	6	44.9	44.9	44.9	16.356	0	11.078	2417900000	56	93833000	87683000	89113000	91936000	114030000	108700000	130610000	131970000	142820000	104060000	139900000	137810000	84754000	81163000	62385000	66792000	65545000	65565000	75737000	50565000	145860000	101100000
+	2.42213	1.79124	3.46111	Q9CAK8	Q9CAK8	3846	ISPF	2-C-methyl-D-erythritol 2,4-cyclodiphosphate synthase, chloroplastic	Color2 [DarkGray]	1	4		carotenoid biosynthetic process [GO:0016117];chlorophyll biosynthetic process [GO:0015995];isopentenyl diphosphate biosynthetic process, methylerythritol 4-phosphate pathway [GO:0019288]	chloroplast [GO:0009507];chloroplast stroma [GO:0009570]	2-C-methyl-D-erythritol 2,4-cyclodiphosphate synthase activity [GO:0008685];metal ion binding [GO:0046872]	+	15	15	15	52.8	52.8	52.8	24.811	0	70.299	13494000000	203	68372000	76736000	48669000	62699000	119640000	117020000	65221000	94424000	929650000	985690000	848870000	759330000	707410000	747470000	681120000	717370000	746490000	455680000	710080000	758060000	907630000	924870000
+	4.5962	1.79063	3.45966	Q8W0Y8	Q8W0Y8	3208	PSB28	Photosystem II reaction center PSB28 protein, chloroplastic	Color2 [DarkGray]	1	4		photosynthesis [GO:0015979]	chloroplast thylakoid membrane [GO:0009535];photosystem II oxygen evolving complex [GO:0009654]		+	8	8	8	32.2	32.2	32.2	20.192	0	76.766	2314300000	35	0	0	0	0	0	0	0	0	354670000	311270000	390220000	343660000	53983000	71695000	44042000	106120000	125460000	44949000	102700000	78040000	39775000	141580000
+	5.7682	1.79008	3.45835	Q9SD45	Q9SD45	5252	F24M12.40	AT3g51000/F24M12_40	Color2 [DarkGray]	1	4			cytosol [GO:0005829]	hydrolase activity [GO:0016787]	+	19	19	19	56.7	56.7	56.7	36.701	0	190.02	20665000000	320	704160000	758060000	633240000	531230000	770790000	897240000	671220000	816690000	1110000000	1056200000	1232000000	1262200000	611070000	599690000	762930000	734750000	890170000	727700000	838270000	888710000	1050000000	1047000000
+	1.55577	1.78638	3.44948	F4IZI7	F4IZI7	757	AtATG18a	Transducin/WD40 repeat-like superfamily protein	Color2 [DarkGray]	1	4					+	5	5	5	14.6	14.6	14.6	43.48	0	7.9091	934900000	27	26375000	43146000	71025000	96686000	35628000	25280000	59655000	48740000	109740000	99796000	62957000	66700000	39271000	18860000	0	25547000	0	40817000	0	6985600	15213000	6188200
+	3.67613	1.78412	3.44407	Q9FLV0	Q9FLV0	4140	DMR6	Protein DOWNY MILDEW RESISTANCE 6	Color2 [DarkGray]	1	4		cellular response to hypoxia [GO:0071456];defense response to bacterium [GO:0042742];defense response to oomycetes [GO:0002229];flavonoid biosynthetic process [GO:0009813];leaf senescence [GO:0010150];response to bacterium [GO:0009617];response to fungus [GO:0009620];response to oomycetes [GO:0002239];response to salicylic acid [GO:0009751];salicylic acid catabolic process [GO:0046244]		dioxygenase activity [GO:0051213];flavone synthase activity [GO:0033759];metal ion binding [GO:0046872];salicylate 5-hydroxylase activity [GO:0034785]	+	11	11	11	41.3	41.3	41.3	39.363	0	54.135	3628000000	72	102590000	166570000	197490000	120620000	158920000	142480000	195090000	131620000	381500000	229720000	338320000	322520000	39800000	33080000	45166000	121070000	188070000	27068000	190310000	164540000	80442000	37145000
+	1.89671	1.78297	3.44134	Q29Q26	Q29Q26	2123	AKR2B	Ankyrin repeat domain-containing protein 2B	Color2 [DarkGray]	1	4		protein targeting to chloroplast [GO:0045036];regulation of transcription, DNA-templated [GO:0006355]	cytosol [GO:0005829];integral component of chloroplast outer membrane [GO:0031359];mitochondrion [GO:0005739];nucleus [GO:0005634];plasma membrane [GO:0005886]	chloroplast targeting sequence binding [GO:0030941];lipid binding [GO:0008289]	+	17	13	13	57.6	47.4	47.4	36.899	0	89.548	9096700000	98	415790000	430560000	251690000	274660000	398800000	445450000	575540000	594490000	453530000	639910000	629470000	448370000	394110000	338700000	344170000	317590000	283450000	314840000	246700000	380690000	331580000	183850000
+	2.12541	1.78236	3.43988	Q38868	Q38868	2139	CPK9	Calcium-dependent protein kinase 9	Color2 [DarkGray]	1	4		intracellular signal transduction [GO:0035556];peptidyl-serine phosphorylation [GO:0018105];protein autophosphorylation [GO:0046777];signal transduction [GO:0007165]	cytoplasm [GO:0005737];cytosol [GO:0005829];nucleus [GO:0005634];plasma membrane [GO:0005886]	ATP binding [GO:0005524];calcium ion binding [GO:0005509];calcium-dependent protein serine/threonine kinase activity [GO:0009931];calmodulin binding [GO:0005516];calmodulin-dependent protein kinase activity [GO:0004683]	+	13	13	11	25.5	25.5	22.6	60.362	0	48.132	3660500000	85	147610000	209440000	139520000	76686000	253660000	234330000	214700000	267820000	206280000	116430000	225490000	230370000	85850000	71512000	110860000	114190000	94959000	64078000	92135000	102320000	158410000	178470000
+	6.03505	1.78163	3.43814	Q9SK82	Q9SK82	5431	UGT85A1	UDP-glycosyltransferase 85A1	Color2 [DarkGray]	1	4			intracellular membrane-bounded organelle [GO:0043231]	cis-zeatin O-beta-D-glucosyltransferase activity [GO:0050502];glucuronosyltransferase activity [GO:0015020];quercetin 3-O-glucosyltransferase activity [GO:0080043];quercetin 7-O-glucosyltransferase activity [GO:0080044];trans-zeatin O-beta-D-glucosyltransferase activity [GO:0050403];UDP-glycosyltransferase activity [GO:0008194]	+	26	26	21	58.1	58.1	50.5	55.01	0	181.89	9247200000	129	212160000	369670000	239930000	165100000	282360000	398460000	418470000	411920000	1358600000	1628300000	1547800000	1035400000	37421000	61835000	67799000	49331000	262980000	101660000	179470000	178460000	50418000	43704000
+	3.64181	1.78058	3.43564	Q9C9M1	Q9C9M1	3809	AR401	Protein-lysine N-methyltransferase At1g66680	Color2 [DarkGray]	1	4		peptidyl-lysine dimethylation [GO:0018027];peptidyl-lysine monomethylation [GO:0018026]	cytoplasm [GO:0005737];cytosol [GO:0005829];mitochondrion [GO:0005739];nucleus [GO:0005634]	protein-lysine N-methyltransferase activity [GO:0016279]	+	27	27	27	78.2	78.2	78.2	39.229	0	323.31	22987000000	234	2297500000	2399400000	1870300000	1950900000	2879300000	2817900000	2545500000	2821500000	351770000	362670000	380060000	285360000	129090000	180940000	146460000	220630000	211330000	160690000	173050000	176030000	170900000	101900000
+	2.18044	1.78024	3.43484	A0A1P8BCJ3	A0A1P8BCJ3	295	At5g44380	FAD-binding Berberine family protein	Color2 [DarkGray]	1	4				FAD binding [GO:0071949];oxidoreductase activity [GO:0016491]	+	12	9	8	17.9	13.6	11.5	65.278	0	11.105	1141600000	26	51938000	51879000	27297000	18866000	145370000	231720000	184040000	202430000	29394000	40049000	51306000	98066000	0	0	0	0	0	6338900	0	2898900	0	0
+	1.90727	1.77901	3.4319	Q9SU14	Q9SU14	5624	NUDT7	Nudix hydrolase 7	Color2 [DarkGray]	1	4		signal transduction [GO:0007165]	cytoplasm [GO:0005737];nucleus [GO:0005634];plasma membrane [GO:0005886]	ADP-ribose diphosphatase activity [GO:0047631];metal ion binding [GO:0046872];NAD binding [GO:0051287];NAD+ diphosphatase activity [GO:0000210];NADH pyrophosphatase activity [GO:0035529]	+	23	23	23	75.5	75.5	75.5	31.884	0	323.31	41896000000	369	533310000	614450000	412720000	405830000	608090000	607130000	552050000	520280000	2476100000	2884200000	3195500000	2242900000	1790800000	2076200000	1895800000	2121600000	2442000000	1485900000	2383800000	2193100000	2606400000	2417400000
+	2.92209	1.77755	3.42843	Q9FKV6	Q9FKV6	4105	At5g44320	Eukaryotic translation initiation factor 3 subunit D	Color2 [DarkGray]	1	4		cap-dependent translational initiation [GO:0002191];formation of cytoplasmic translation initiation complex [GO:0001732];translational initiation [GO:0006413]	cytosol [GO:0005829];eukaryotic 43S preinitiation complex [GO:0016282];eukaryotic 48S preinitiation complex [GO:0033290];eukaryotic translation initiation factor 3 complex [GO:0005852];plastid [GO:0009536]	mRNA cap binding [GO:0098808];translation initiation factor activity [GO:0003743]	+	45	45	21	67	67	42.9	66.223	0	323.31	43909000000	521	3126800000	4080500000	2823700000	2997400000	4984900000	4660600000	4390700000	5456100000	927550000	915630000	1266100000	913370000	440050000	535970000	530980000	507520000	738650000	491880000	735840000	823830000	580440000	737550000
+	4.75703	1.77496	3.42229	Q9SRY5	Q9SRY5	5567	GSTF7	Glutathione S-transferase F7	Color2 [DarkGray]	1	4		defense response to bacterium [GO:0042742];defense response to fungus, incompatible interaction [GO:0009817];glutathione metabolic process [GO:0006749];response to cadmium ion [GO:0046686];toxin catabolic process [GO:0009407]	cytoplasm [GO:0005737];cytosol [GO:0005829];extracellular region [GO:0005576];nucleus [GO:0005634];vacuole [GO:0005773]	cobalt ion binding [GO:0050897];copper ion binding [GO:0005507];glutathione binding [GO:0043295];glutathione transferase activity [GO:0004364]	+	30	30	11	92.8	92.8	58.9	23.598	0	321.79	56743000000	398	1880700000	2524800000	1856100000	1760800000	1457700000	1755600000	1523600000	1959000000	3846200000	3130700000	4288000000	4287300000	1378600000	1675000000	1953200000	1680900000	2123200000	1702900000	2568700000	2613900000	2650300000	2887700000
+	3.09842	1.77378	3.41949	Q9FK60	Q9FK60	4074	CSD3	Superoxide dismutase [Cu-Zn] 3	Color2 [DarkGray]	1	4		cellular response to high light intensity [GO:0071486];cellular response to light intensity [GO:0071484];cellular response to ozone [GO:0071457];cellular response to salt stress [GO:0071472];cellular response to UV-B [GO:0071493];removal of superoxide radicals [GO:0019430];response to oxidative stress [GO:0006979]	extracellular region [GO:0005576];extracellular space [GO:0005615];peroxisome [GO:0005777];vacuole [GO:0005773]	copper ion binding [GO:0005507];superoxide dismutase activity [GO:0004784]	+	8	7	7	75.6	75.6	75.6	16.941	0	28.557	3983300000	35	0	0	0	0	0	0	0	6948000	249720000	162770000	125650000	462700000	311570000	190700000	247920000	163290000	273580000	229260000	231950000	234220000	260540000	38050000
+	4.95646	1.77305	3.41775	A0A1P8AMS1	A0A1P8AMS1	80	At1g21400	Thiamin diphosphate-binding fold (THDP-binding) superfamily protein	Color2 [DarkGray]	1	4			integral component of membrane [GO:0016021]	oxidoreductase activity, acting on the aldehyde or oxo group of donors, disulfide as acceptor [GO:0016624]	+	20	20	19	42.7	42.7	41.2	59.377	0	194.94	3441100000	58	5062600	5815200	0	4343200	16649000	8224700	0	0	788800000	710040000	759540000	670470000	35718000	13025000	13750000	12902000	63983000	17886000	84035000	63737000	37064000	53532000
+	2.41964	1.77151	3.4141	O64767	O64767	1374	At2g35040	AICARFT/IMPCHase bienzyme family protein	Color2 [DarkGray]	1	4		purine nucleotide biosynthetic process [GO:0006164]		IMP cyclohydrolase activity [GO:0003937];phosphoribosylaminoimidazolecarboxamide formyltransferase activity [GO:0004643]	+	56	56	56	85.7	85.7	85.7	59.471	0	323.31	102120000000	1128	2952000000	3531200000	3157300000	2537700000	3218900000	3392500000	3250500000	3493000000	6524900000	6011700000	6900000000	5791300000	2854400000	3763900000	3447300000	3558500000	4929300000	3115600000	4923600000	4985100000	4896000000	4956100000
+	3.90543	1.77018	3.41098	Q9LJR2	Q9LJR2	4521	LEC	Lectin-like protein LEC	Color2 [DarkGray]	1	4		cellular response to chitin [GO:0071323];cellular response to ethylene stimulus [GO:0071369];cellular response to jasmonic acid stimulus [GO:0071395];defense response to fungus, incompatible interaction [GO:0009817];ethylene-activated signaling pathway [GO:0009873];response to wounding [GO:0009611]	apoplast [GO:0048046];cell wall [GO:0005618];cytosol [GO:0005829]	carbohydrate binding [GO:0030246]	+	26	19	19	75.3	59.8	59.8	29.749	0	323.31	122380000000	417	64118000	38836000	36806000	23192000	134320000	99275000	101440000	83836000	13166000000	12192000000	10664000000	11734000000	5771300000	5828900000	6878600000	6857700000	6064000000	5407900000	6255800000	5492000000	5980100000	6339200000
+	1.58937	1.76973	3.40991	Q9ZPQ3	Q9ZPQ3	5883	GEK1	D-aminoacyl-tRNA deacylase	Color2 [DarkGray]	1	4		D-amino acid catabolic process [GO:0019478]	cytosol [GO:0005829];nucleus [GO:0005634]	D-aminoacyl-tRNA deacylase activity [GO:0051499];metal ion binding [GO:0046872]	+	6	6	6	22.1	22.1	22.1	34.731	0	10.93	1467400000	57	68177000	115000000	93546000	89538000	61966000	41786000	89892000	51116000	72377000	82816000	32687000	88457000	10432000	87609000	38801000	25703000	66550000	30520000	55530000	62517000	49427000	24027000
+	6.58082	1.7695	3.40935	A8MQR6	A8MQR6	382	ALDH6B2	Aldehyde dehydrogenase 6B2	Color2 [DarkGray]	1	4				methylmalonate-semialdehyde dehydrogenase (acylating) activity [GO:0004491]	+	39	39	39	59.8	59.8	59.8	53.406	0	323.31	72820000000	602	3001300000	3220100000	2548600000	2396900000	3396500000	3855800000	3512100000	3512100000	5360400000	4964500000	5527800000	5243000000	1486400000	1637200000	1741700000	1729900000	2782500000	1843200000	2694200000	2766500000	2374000000	2347800000
+	2.23652	1.76882	3.40776	Q9SFU0	Q9SFU0	5299	At3g07100	Protein transport protein Sec24-like At3g07100	Color2 [DarkGray]	1	4		endoplasmic reticulum organization [GO:0007029];endoplasmic reticulum to Golgi vesicle-mediated transport [GO:0006888];ER body organization [GO:0080119];Golgi organization [GO:0007030];intracellular protein transport [GO:0006886];male gamete generation [GO:0048232];negative regulation of DNA endoreduplication [GO:0032876];regulation of cell size [GO:0008361]	COPII vesicle coat [GO:0030127];endoplasmic reticulum membrane [GO:0005789];Golgi membrane [GO:0000139]	zinc ion binding [GO:0008270]	+	41	41	41	43.4	43.4	43.4	113.96	0	239.03	33633000000	251	3305900000	3720000000	2812000000	3120900000	3990600000	3798600000	3616700000	4042100000	541680000	909340000	716400000	592240000	21397000	712770000	17443000	984940000	14462000	567930000	13638000	19577000	35571000	27808000
+	1.70028	1.76567	3.40033	Q9LF02	Q9LF02	4397	EARLY FLOWERING 9	At5g16260	Color2 [DarkGray]	1	4		mRNA splicing, via spliceosome [GO:0000398];negative regulation of flower development [GO:0009910];nuclear-transcribed mRNA catabolic process, nonsense-mediated decay [GO:0000184]	cytosol [GO:0005829];nucleus [GO:0005634];U2 snRNP [GO:0005686];U2-type spliceosomal complex [GO:0005684]	mRNA binding [GO:0003729];RNA binding [GO:0003723]	+	6	6	6	12.7	12.7	12.7	57.893	0	7.8385	974590000	25	31891000	55751000	20500000	33023000	80694000	64424000	110140000	78636000	52886000	27191000	78690000	61053000	11389000	24122000	33909000	25639000	25509000	4970100	42416000	35763000	11220000	12106000
+	6.69076	1.76287	3.39374	Q9FZC4	Q9FZC4	4344	FOX1	Berberine bridge enzyme-like 3	Color2 [DarkGray]	1	4		cellular response to hypoxia [GO:0071456]	cell wall [GO:0005618];endoplasmic reticulum [GO:0005783];extracellular region [GO:0005576];plasma membrane [GO:0005886]	FAD binding [GO:0071949];oxidoreductase activity [GO:0016491]	+	27	26	16	46.9	45.6	30.3	59.817	0	136.41	8965000000	148	752320000	673750000	539570000	580290000	276100000	344650000	307030000	239600000	1153300000	992900000	1171200000	1074000000	19149000	66620000	51843000	56625000	123050000	58817000	142820000	126680000	54292000	50395000
+	1.45416	1.76274	3.39341	O23310	O23310	1221	NFYB3	Nuclear transcription factor Y subunit B-3	Color2 [DarkGray]	1	4		positive regulation of transcription, DNA-templated [GO:0045893]	cytosol [GO:0005829];nucleus [GO:0005634]	DNA-binding transcription factor activity [GO:0003700];protein heterodimerization activity [GO:0046982];sequence-specific DNA binding [GO:0043565]	+	7	7	3	28.6	28.6	11.8	17.186	0	11.64	2944300000	46	4085500	5713200	8057200	3250500	14718000	11301000	11588000	18191000	206140000	264680000	188280000	241840000	151400000	137580000	225560000	110480000	122610000	91992000	142070000	194670000	126410000	163360000
+	1.92579	1.761	3.38932	Q9LU86	Q9LU86	4740	PRXQ	Peroxiredoxin Q, chloroplastic	Color2 [DarkGray]	1	4		cell redox homeostasis [GO:0045454];cellular response to oxidative stress [GO:0034599]	chloroplast thylakoid lumen [GO:0009543];chloroplast thylakoid membrane [GO:0009535];cytoplasm [GO:0005737]	thioredoxin peroxidase activity [GO:0008379]	+	39	39	2	68.5	68.5	8.3	23.678	0	323.31	160340000000	757	265570000	320470000	12585000	354530000	17347000	397840000	3551000	20086000	16120000000	15369000000	13903000000	11363000000	6043200000	9423200000	9570500000	6850900000	7091300000	4223000000	6437500000	5390700000	14686000000	9936300000
+	2.46318	1.75939	3.38555	Q8VZC3	Q8VZC3	3177	ALDH12A1	Delta-1-pyrroline-5-carboxylate dehydrogenase 12A1, mitochondrial	Color2 [DarkGray]	1	4		proline catabolic process to glutamate [GO:0010133];proline metabolic process [GO:0006560];reactive oxygen species metabolic process [GO:0072593];response to salt stress [GO:0009651]	cytosol [GO:0005829];mitochondrial matrix [GO:0005759];mitochondrion [GO:0005739];plastid [GO:0009536]	1-pyrroline-5-carboxylate dehydrogenase activity [GO:0003842];cobalt ion binding [GO:0050897];oxidoreductase activity, acting on the aldehyde or oxo group of donors, NAD or NADP as acceptor [GO:0016620];zinc ion binding [GO:0008270]	+	44	44	44	73	73	73	61.772	0	323.31	70180000000	678	1324200000	1646700000	1233400000	1159800000	3420600000	3944300000	3432800000	3637000000	3575100000	3204100000	4368700000	3917600000	1793400000	2297600000	2810400000	2606200000	2912400000	2056800000	3116100000	3226200000	3826500000	3200700000
+	1.66472	1.75679	3.37946	Q43125	Q43125	2306	CRY1	Cryptochrome-1	Color2 [DarkGray]	1	4		anthocyanin-containing compound metabolic process [GO:0046283];auxin transport [GO:0060918];blue light signaling pathway [GO:0009785];circadian regulation of calcium ion oscillation [GO:0010617];circadian rhythm [GO:0007623];defense response [GO:0006952];detection of light stimulus [GO:0009583];flavin adenine dinucleotide metabolic process [GO:0072387];negative regulation of lateral root developm…	cytoplasm [GO:0005737];cytosol [GO:0005829];nuclear body [GO:0016604];nucleus [GO:0005634];PML body [GO:0016605]	ATP binding [GO:0005524];blue light photoreceptor activity [GO:0009882];FAD binding [GO:0071949];identical protein binding [GO:0042802];kinase activity [GO:0016301];metal ion binding [GO:0046872];protein kinase activity [GO:0004672]	+	21	21	21	33.2	33.2	33.2	76.694	0	77.456	4912700000	158	43280000	39063000	10350000	27144000	44889000	70987000	55995000	38582000	387040000	354070000	520230000	422070000	181380000	192560000	243140000	205890000	300860000	124670000	252800000	288430000	336780000	249570000
+	2.58017	1.75529	3.37594	O80690	O80690	1467	BGLU46	Beta-glucosidase 46	Color2 [DarkGray]	1	4		carbohydrate metabolic process [GO:0005975];lignin biosynthetic process [GO:0009809]		beta-glucosidase activity [GO:0008422];coniferin beta-glucosidase activity [GO:0047782];scopolin beta-glucosidase activity [GO:0102483]	+	39	39	39	64.5	64.5	64.5	59.112	0	323.31	17436000000	167	81272000	84606000	44671000	73624000	208530000	289480000	181510000	204520000	4092700000	3812100000	4244600000	3720700000	0	39381000	24430000	72504000	36445000	68034000	9255500	68907000	45192000	0
+	1.46306	1.75472	3.3746	Q42541	Q42541	2286	UBC13	Ubiquitin-conjugating enzyme E2 13	Color2 [DarkGray]	1	4		protein polyubiquitination [GO:0000209];ubiquitin-dependent protein catabolic process [GO:0006511]	cytosol [GO:0005829]	ATP binding [GO:0005524];ubiquitin conjugating enzyme activity [GO:0061631];ubiquitin-protein transferase activity [GO:0004842]	+	7	3	3	41.6	17.5	17.5	18.822	0	53.036	3223800000	24	311770000	298750000	261130000	247090000	381440000	271960000	271960000	335340000	70135000	20893000	86618000	73945000	87210000	60862000	56403000	17493000	33662000	0	9954800	0	85994000	61223000
+	1.68818	1.7546	3.37433	Q9SY56	Q9SY56	5732	At1g10140	At1g10140	Color2 [DarkGray]	1	4		cellular response to hypoxia [GO:0071456]	plasma membrane [GO:0005886]		+	5	5	5	37.1	37.1	37.1	18.373	0	23.525	406030000	6	0	0	0	2866200	0	14731000	143750000	0	40669000	38764000	68425000	57983000	0	11379000	0	5390800	5568600	0	0	0	0	0
+	2.57321	1.75411	3.37317	Q9C5S1	Q9C5S1	3689	MKP1	Protein-tyrosine-phosphatase MKP1	Color2 [DarkGray]	1	4		defense response [GO:0006952];response to L-glutamate [GO:1902065];response to salt stress [GO:0009651];response to UV-B [GO:0010224];response to UV-C [GO:0010225]	cytosol [GO:0005829]	MAP kinase tyrosine/serine/threonine phosphatase activity [GO:0017017];protein tyrosine phosphatase activity [GO:0004725]	+	8	8	8	14	14	14	85.963	0	32.377	946640000	21	134290000	129900000	60661000	102530000	146540000	106830000	111060000	131010000	3358100	2569900	6081200	4863800	0	0	0	3403600	0	0	0	0	0	0
+	2.51877	1.75365	3.37211	Q94BS2	Q94BS2	3506	MET1	Protein MET1, chloroplastic	Color2 [DarkGray]	1	4		photosynthesis [GO:0015979];photosystem II assembly [GO:0010207];photosystem II repair [GO:0010206];response to high light intensity [GO:0009644];response to light stimulus [GO:0009416];response to wounding [GO:0009611]	chloroplast [GO:0009507];chloroplast envelope [GO:0009941];chloroplast membrane [GO:0031969];chloroplast stroma [GO:0009570];chloroplast thylakoid [GO:0009534];chloroplast thylakoid membrane [GO:0009535];chromoplast stroma [GO:0009575];extrinsic component of thylakoid membrane [GO:0035448];nucleus [GO:0005634];photosystem II [GO:0009523];thylakoid [GO:0009579]		+	40	40	40	69.9	69.9	69.9	37.41	0	323.31	44803000000	392	10390000	0	19650000	4063200	0	15052000	10297000	7477400	5679200000	5373200000	6153200000	6147300000	1380300000	1594900000	1526000000	1611000000	2091100000	1517900000	2159000000	2239100000	2009900000	1626700000
+	2.1342	1.75328	3.37123	F4J738;REV__Q9M0M4	F4J738	796	At3g59020	Importin beta-like SAD2 homolog	Color2 [DarkGray]	1	4		protein import into nucleus [GO:0006606]	cytosol [GO:0005829];nuclear envelope [GO:0005635]	Ran GTPase binding [GO:0008536]	+	44	44	41	38.2	38.2	38.1	117.77	0	323.31	25860000000	315	2748000000	3139700000	2229800000	2642900000	3191300000	3316000000	2784900000	3090100000	203900000	278210000	300040000	221390000	146290000	169270000	132220000	134030000	95516000	93267000	86468000	97515000	177950000	124850000
+	7.91833	1.74693	3.35643	Q9FKK7	Q9FKK7	4092	XYLA	Xylose isomerase	Color2 [DarkGray]	1	4		D-xylose metabolic process [GO:0042732]	endoplasmic reticulum [GO:0005783];Golgi apparatus [GO:0005794];plastid [GO:0009536];secretory vesicle [GO:0099503];vacuolar membrane [GO:0005774];vacuole [GO:0005773]	metal ion binding [GO:0046872];xylose isomerase activity [GO:0009045]	+	60	60	60	78.2	78.2	78.2	53.719	0	323.31	34171000000	431	276600000	207520000	201370000	205620000	507450000	556490000	537540000	589870000	6047900000	5657500000	6762900000	5829700000	230770000	237430000	348820000	345910000	1039800000	542420000	909190000	1053700000	480680000	727270000
+	2.91424	1.74647	3.35536	O24496	O24496	1264	GLX2-2	Hydroxyacylglutathione hydrolase cytoplasmic	Color2 [DarkGray]	1	4		methylglyoxal catabolic process to D-lactate via S-lactoyl-glutathione [GO:0019243]	cytosol [GO:0005829];secretory vesicle [GO:0099503]	hydroxyacylglutathione hydrolase activity [GO:0004416];metal ion binding [GO:0046872]	+	27	27	27	85.3	85.3	85.3	28.791	0	323.31	46920000000	440	1166900000	1412400000	946000000	808570000	1419300000	1276300000	1284300000	1243800000	3006600000	2786600000	3096900000	2853100000	1317100000	1665700000	1919000000	1604700000	2276400000	1375000000	2313300000	2127300000	3028200000	2550800000
+	1.55552	1.74589	3.35402	Q42449	Q42449	2270	PRF1	Profilin-1	Color2 [DarkGray]	1	4		actin polymerization or depolymerization [GO:0008154];defense response [GO:0006952];inflorescence development [GO:0010229];lateral root development [GO:0048527];leaf development [GO:0048366];sequestering of actin monomers [GO:0042989];unidimensional cell growth [GO:0009826]	cell cortex [GO:0005938];cell wall [GO:0005618];cytoplasm [GO:0005737];cytosol [GO:0005829];mitochondrion [GO:0005739];nucleolus [GO:0005730];nucleus [GO:0005634];phragmoplast [GO:0009524];plasma membrane [GO:0005886];plasmodesma [GO:0009506];spindle [GO:0005819]	actin monomer binding [GO:0003785]	+	16	11	11	99.2	90.8	90.8	14.266	0	317.45	95665000000	351	3507000000	3549500000	2982900000	2879600000	4951100000	5085300000	4898800000	5145500000	1399700000	1541700000	7955500000	7673700000	967430000	1274100000	7398900000	1065500000	8295900000	909210000	1119800000	9090600000	1846600000	1712100000
+	1.91759	1.74379	3.34913	Q9FFJ3	Q9FFJ3	3903	PIRL1	Plant intracellular Ras-group-related LRR protein 1	Color2 [DarkGray]	1	4		microgametogenesis [GO:0055046];pollen development [GO:0009555]			+	2	2	2	5.7	5.7	5.7	56.577	0.0034691	1.9774	1080000000	23	175660000	140540000	97876000	116320000	104800000	61063000	85487000	134590000	33142000	27419000	40623000	34210000	3743800	0	3696600	3977600	4708500	0	12134000	0	0	0
+	2.49923	1.74253	3.34623	Q00874;REV__Q9FH91	Q00874	2008	DRT100	DNA damage-repair/toleration protein DRT100	Color2 [DarkGray]	1	4		DNA repair [GO:0006281]	chloroplast [GO:0009507]	nucleotide binding [GO:0000166]	+	6	6	6	19.9	19.9	19.9	39.556	0	11.265	423700000	9	26384000	30213000	31894000	42977000	19444000	62304000	46435000	13856000	30329000	8500800	21838000	23315000	7565700	19695000	0	0	0	4877000	0	0	13638000	8701000
+	1.34049	1.74074	3.34206	Q84L30	Q84L30	2542	RAD23D	Ubiquitin receptor RAD23d	Color2 [DarkGray]	1	4		nucleotide-excision repair [GO:0006289];proteasome-mediated ubiquitin-dependent protein catabolic process [GO:0043161];response to cold [GO:0009409]	cytoplasm [GO:0005737];cytosol [GO:0005829];host cell nucleus [GO:0042025];nucleoplasm [GO:0005654];nucleus [GO:0005634];plastid [GO:0009536]	damaged DNA binding [GO:0003684];polyubiquitin modification-dependent protein binding [GO:0031593];proteasome binding [GO:0070628];ubiquitin binding [GO:0043130]	+	15	15	13	39.9	39.9	35.4	40.066	0	228.96	35506000000	275	1901100000	1732500000	1430600000	1468000000	2686700000	2201000000	2009200000	2565000000	1244300000	1391900000	1276200000	1350000000	877550000	1169600000	901250000	937730000	1196900000	925670000	1229100000	1375100000	1358000000	1405600000
+	1.82342	1.74007	3.34052	O81024	O81024	1510	EMB1187	Probable ethanolamine kinase	Color2 [DarkGray]	1	4		phosphatidylethanolamine biosynthetic process [GO:0006646];phospholipid biosynthetic process [GO:0008654]	plasma membrane [GO:0005886]	ATP binding [GO:0005524];ethanolamine kinase activity [GO:0004305]	+	20	20	20	47.3	47.3	47.3	42.859	0	42.362	5493500000	148	448040000	670940000	412160000	449550000	447010000	537670000	438250000	538480000	197720000	124070000	125030000	69645000	110630000	103810000	89133000	87147000	93258000	40514000	80131000	61188000	121360000	50385000
+	1.89127	1.73805	3.33585	Q9ZW34	Q9ZW34	6028	ENO3	Cytosolic enolase 3	Color2 [DarkGray]	1	4		glycolytic process [GO:0006096];regulation of vacuole fusion, non-autophagic [GO:0032889]	cytoplasm [GO:0005737];cytosol [GO:0005829];nucleus [GO:0005634];peroxisome [GO:0005777];phosphopyruvate hydratase complex [GO:0000015]	magnesium ion binding [GO:0000287];phosphopyruvate hydratase activity [GO:0004634]	+	25	24	24	56.2	56.2	56.2	51.599	0	135.12	8311800000	178	577160000	589010000	429890000	421380000	868000000	899260000	885670000	816690000	272360000	260230000	296620000	326010000	74814000	96399000	120940000	135900000	140970000	63553000	137820000	194600000	174790000	160520000
+	2.30883	1.73632	3.33183	Q67XG0	Q67XG0	2408	GLB3	Two-on-two hemoglobin-3	Color2 [DarkGray]	1	4		oxygen transport [GO:0015671];response to auxin [GO:0009733];response to hypoxia [GO:0001666]		heme binding [GO:0020037];metal ion binding [GO:0046872];oxygen binding [GO:0019825];oxygen carrier activity [GO:0005344]	+	2	2	2	7.4	7.4	7.4	20.196	0	3.5877	210580000	14	13517000	39211000	30185000	13673000	17169000	16809000	16359000	14579000	4543900	4597000	4793100	4715700	1790400	1591500	2634300	1852100	2952500	1563000	3489800	2611400	2611900	3165500
+	3.12989	1.73533	3.32956	Q9C9W3	Q9C9W3	3819	At1g67980	Putative caffeoyl-CoA O-methyltransferase At1g67980	Color2 [DarkGray]	1	4		lignin biosynthetic process [GO:0009809];methylation [GO:0032259]	cytosol [GO:0005829]	caffeoyl-CoA O-methyltransferase activity [GO:0042409];metal ion binding [GO:0046872];S-adenosylmethionine-dependent methyltransferase activity [GO:0008757]	+	8	8	6	38.4	38.4	30.6	26.114	0	5.9315	2498700000	24	0	0	6243500	0	3915500	0	0	0	249830000	173120000	293540000	296240000	533770000	485350000	61005000	42301000	74084000	43641000	59664000	18530000	38381000	39349000
+	2.90803	1.73434	3.32728	A0A1P8ATL2	A0A1P8ATL2	123	CRB	Chloroplast RNA binding protein	Color2 [DarkGray]	1	4		rRNA processing [GO:0006364]	cytosol [GO:0005829]	catalytic activity [GO:0003824];RNA binding [GO:0003723]	+	65	65	65	77	77	77	43.266	0	323.31	481470000000	1574	50183000	49612000	124000000	59307000	45590000	132610000	186710000	95776000	36437000000	32084000000	38585000000	33164000000	21878000000	24995000000	24812000000	25506000000	24555000000	16093000000	24690000000	23972000000	42231000000	34851000000
+	1.87026	1.73155	3.32085	F4IPY2	F4IPY2	712	SYCO	Cysteine--tRNA ligase, chloroplastic/mitochondrial	Color2 [DarkGray]	1	4		cristae formation [GO:0042407];cysteinyl-tRNA aminoacylation [GO:0006423];polar nucleus fusion [GO:0010197];regulation of programmed cell death [GO:0043067]	chloroplast [GO:0009507];chloroplast stroma [GO:0009570];cytoplasm [GO:0005737];cytosol [GO:0005829];mitochondrion [GO:0005739]	ATP binding [GO:0005524];cysteine-tRNA ligase activity [GO:0004817];metal ion binding [GO:0046872]	+	31	31	31	51	51	51	63.913	0	188.02	13954000000	270	4415500	7720500	18259000	0	11461000	17328000	0	5857900	1034300000	931260000	1023600000	917840000	702130000	728970000	894190000	865480000	876900000	578990000	813820000	862040000	932410000	973780000
+	1.31871	1.73028	3.31793	Q940J8	Q940J8	3386	PAE7	Pectin acetylesterase 7	Color2 [DarkGray]	1	4		cell wall organization [GO:0071555]	cell wall [GO:0005618];extracellular region [GO:0005576];plant-type cell wall [GO:0009505];plasmodesma [GO:0009506]	carboxylic ester hydrolase activity [GO:0052689];pectin acetylesterase activity [GO:0052793]	+	53	53	48	87.7	87.7	87.7	42.125	0	323.31	192250000000	880	55612000	39543000	53054000	35324000	115900000	85751000	74704000	75666000	13765000000	13583000000	14880000000	11899000000	10546000000	11220000000	11288000000	11957000000	9380400000	7095300000	9604200000	9476000000	14886000000	13288000000
+	2.44054	1.72936	3.31581	Q94K52	Q94K52	3574	At1g02475	Polyketide cyclase/dehydrase and lipid transport superfamily protein	Color2 [DarkGray]	1	4					+	9	8	8	36.5	36.5	36.5	25.037	0	32.971	7240900000	81	0	0	0	0	4017700	0	0	0	523550000	497450000	827790000	657030000	156630000	294680000	401570000	352370000	406400000	252560000	403280000	375990000	369610000	592500000
+	2.74051	1.72834	3.31345	A8MR72	A8MR72	386	At2g26210	Ankyrin repeat family protein	Color2 [DarkGray]	1	4					+	6	6	6	29.9	29.9	29.9	17.688	0	48.615	1841500000	42	21734000	23266000	33785000	30768000	81304000	87350000	81342000	74332000	99055000	69550000	102400000	121030000	92703000	55933000	108150000	144580000	58961000	54311000	59597000	62210000	101780000	86019000
+	2.51284	1.72485	3.30547	O81645	O81645	1538	VLN3	Villin-3	Color2 [DarkGray]	1	4		actin filament bundle assembly [GO:0051017];actin filament capping [GO:0051693];actin filament severing [GO:0051014];actin polymerization or depolymerization [GO:0008154]	actin cytoskeleton [GO:0015629];actin filament [GO:0005884];cytoplasm [GO:0005737];cytosol [GO:0005829]	actin filament binding [GO:0051015]	+	84	66	66	69.2	60.4	60.4	106.35	0	323.31	89045000000	1042	3292900000	3480900000	2717700000	2750900000	4452800000	4239900000	3877500000	4052500000	4478100000	4437700000	5025000000	4352400000	2147800000	2953800000	2937100000	3347600000	4140400000	2316300000	4029000000	4113400000	4245600000	3874800000
+	1.21715	1.72456	3.3048	Q9FNP8	Q9FNP8	4226	RPS19C	40S ribosomal protein S19-3	Color2 [DarkGray]	1	4		ribosomal small subunit assembly [GO:0000028];translation [GO:0006412]	cytosol [GO:0005829];cytosolic ribosome [GO:0022626];cytosolic small ribosomal subunit [GO:0022627];plastid [GO:0009536];polysomal ribosome [GO:0042788];vacuole [GO:0005773]	RNA binding [GO:0003723];structural constituent of ribosome [GO:0003735]	+	21	12	9	74.1	43.4	41.3	15.697	0	82.23	27765000000	85	1156000000	1330400000	1057200000	957970000	1246200000	1520500000	1323700000	1501900000	1174000000	942040000	1559600000	1375700000	868750000	981010000	953730000	969350000	1134300000	697680000	1064200000	1126900000	1229800000	1245300000
+	3.67511	1.71919	3.2925	O81865	O81865	1547	PP2A1	Protein PHLOEM PROTEIN 2-LIKE A1	Color2 [DarkGray]	1	4		response to insect [GO:0009625]		carbohydrate binding [GO:0030246];proteoglycan binding [GO:0043394]	+	5	5	5	24	24	24	28.101	0	47.59	680960000	34	24598000	24793000	8133300	16171000	24493000	9205400	24511000	10227000	65900000	43210000	85997000	80888000	7416800	57122000	11253000	29210000	7861500	17461000	10274000	23951000	29220000	22038000
+	3.46833	1.71663	3.28667	F4HXZ1	F4HXZ1	569	BRO1	Vacuolar-sorting protein BRO1	Color2 [DarkGray]	1	4		endosome to plasma membrane protein transport [GO:0099638];multivesicular body organization [GO:0036257];protein transport to vacuole involved in ubiquitin-dependent protein catabolic process via the multivesicular body sorting pathway [GO:0043328];vacuole organization [GO:0007033]	cytoplasm [GO:0005737];cytosol [GO:0005829];late endosome [GO:0005770];multivesicular body [GO:0005771];plasmodesma [GO:0009506]	protein self-association [GO:0043621];ubiquitin binding [GO:0043130]	+	46	46	46	50.5	50.5	50.5	95.208	0	280.6	24013000000	370	1777600000	1639300000	1328800000	1457500000	2522400000	2323000000	2274900000	1978300000	646100000	577390000	717180000	514800000	580870000	432180000	476820000	474540000	510770000	385440000	484540000	543290000	630240000	646420000
+	1.18922	1.71611	3.2855	Q67XD6	Q67XD6	2406	At2g32500	At2g32500	Color2 [DarkGray]	1	4					+	5	5	5	19.9	19.9	19.9	31.598	0	9.2383	1125100000	27	0	9715200	0	0	0	0	0	0	57592000	68689000	97758000	68010000	62605000	70360000	84520000	75281000	69362000	54826000	58148000	72265000	84052000	65444000
+	1.18291	1.71244	3.27713	Q8LCL3	Q8LCL3	2880	RPL27B	60S ribosomal protein L27-2	Color2 [DarkGray]	1	4		translation [GO:0006412]	cytosol [GO:0005829];cytosolic large ribosomal subunit [GO:0022625];cytosolic ribosome [GO:0022626];polysomal ribosome [GO:0042788]	structural constituent of ribosome [GO:0003735]	+	27	9	9	85.2	41.5	41.5	15.614	0	27.857	5322300000	49	518210000	764500000	445100000	579120000	707670000	652990000	835650000	598370000	39184000	29920000	32457000	0	9925600	4672900	12445000	13648000	12891000	0	13900000	0	19485000	15722000
+	1.23821	1.71203	3.27621	Q8GWE1	Q8GWE1	2645	UCH3	Ubiquitin carboxyl-terminal hydrolase 3	Color2 [DarkGray]	1	4		protein deubiquitination [GO:0016579];ubiquitin-dependent protein catabolic process [GO:0006511]	cytoplasm [GO:0005737];cytosol [GO:0005829]	thiol-dependent ubiquitin-specific protease activity [GO:0004843]	+	14	14	14	50.4	50.4	50.4	25.712	0	84.52	6381300000	124	366680000	462560000	360180000	352240000	539100000	544710000	626200000	612500000	268540000	263930000	272420000	69634000	95174000	149230000	101370000	115780000	193480000	69767000	141890000	114590000	204730000	160220000
+	2.41943	1.711	3.27388	Q38907	Q38907	2152	XTH25	Probable xyloglucan endotransglucosylase/hydrolase protein 25	Color2 [DarkGray]	1	4		cell wall organization [GO:0071555];plant-type cell wall biogenesis [GO:0009832];xyloglucan metabolic process [GO:0010411]	apoplast [GO:0048046];cell wall [GO:0005618]	hydrolase activity, hydrolyzing O-glycosyl compounds [GO:0004553];xyloglucan:xyloglucosyl transferase activity [GO:0016762]	+	13	9	7	35.2	28.9	24.3	32.572	0	55.468	6410800000	25	0	0	0	0	0	0	0	0	1599600000	1612900000	1514400000	1168100000	0	12925000	155070000	13749000	14336000	0	141170000	0	178580000	0
+	3.26149	1.70995	3.27148	Q8W207	Q8W207	3217	CSN2	COP9 signalosome complex subunit 2	Color2 [DarkGray]	1	4		multicellular organism development [GO:0007275];negative regulation of transcription, DNA-templated [GO:0045892];protein catabolic process [GO:0030163];protein deneddylation [GO:0000338];red, far-red light phototransduction [GO:0009585]	COP9 signalosome [GO:0008180];cytosol [GO:0005829];nucleus [GO:0005634]	transcription corepressor activity [GO:0003714]	+	14	14	14	33.5	33.5	33.5	51.186	0	71.445	4493300000	79	508830000	485490000	353200000	427090000	588450000	666260000	641820000	587110000	32741000	22383000	39318000	33609000	4657000	0	11281000	6444700	7651600	0	7120300	5458400	9176400	18781000
+	1.7539	1.70716	3.26516	Q8RWK6	Q8RWK6	2987	At3g06770	Pectin lyase-like superfamily protein	Color2 [DarkGray]	1	4		carbohydrate metabolic process [GO:0005975];cell wall organization [GO:0071555]	extracellular region [GO:0005576]	lyase activity [GO:0016829];polygalacturonase activity [GO:0004650]	+	12	12	10	26.7	26.7	25.1	48.124	0	44.377	13247000000	148	224180000	340510000	181040000	103110000	154050000	185850000	262390000	193980000	804290000	828210000	994390000	884910000	743160000	828720000	575970000	532910000	510300000	583370000	574200000	760420000	969400000	649890000
+	1.53997	1.70565	3.26176	F4IFH2	F4IFH2	672	PIP	Proline iminopeptidase	Color2 [DarkGray]	1	4			cytoplasm [GO:0005737]	aminopeptidase activity [GO:0004177]	+	29	2	2	75.4	4	4	37.433	0	34.355	2196500000	28	47398000	50232000	32927000	33456000	47146000	47784000	57274000	52554000	152490000	101880000	177510000	187190000	107610000	65366000	54565000	49031000	53575000	49837000	96281000	93965000	166320000	163060000
+	3.24542	1.70536	3.2611	O65201	O65201	1393	ACX2	Acyl-coenzyme A oxidase 2, peroxisomal	Color2 [DarkGray]	1	4		fatty acid beta-oxidation [GO:0006635];fatty acid beta-oxidation using acyl-CoA oxidase [GO:0033540];lipid homeostasis [GO:0055088];long-chain fatty acid metabolic process [GO:0001676]	peroxisome [GO:0005777]	acyl-CoA oxidase activity [GO:0003997];FAD binding [GO:0071949];fatty acid binding [GO:0005504];flavin adenine dinucleotide binding [GO:0050660]	+	28	28	28	41.9	41.9	41.9	77.479	0	63.177	6144200000	92	814270000	592960000	453690000	450640000	768850000	816820000	717570000	884190000	123060000	108160000	188660000	96557000	2888500	0	8823200	21353000	23745000	6950300	24220000	23461000	4418500	7554400
+	1.46821	1.70452	3.2592	Q8L745	Q8L745	2791	At5g42220	AT5g42220/K5J14_2	Color2 [DarkGray]	1	4		ubiquitin-dependent ERAD pathway [GO:0030433]	BAT3 complex [GO:0071818];cytosol [GO:0005829]	misfolded protein binding [GO:0051787];polyubiquitin modification-dependent protein binding [GO:0031593]	+	22	22	22	38.8	38.8	38.8	92.553	0	178.42	6824400000	112	786880000	848030000	398170000	640340000	1176500000	1079100000	753770000	955730000	28367000	33899000	23365000	44789000	6960600	5740300	5375200	679090	5886500	0	718520	747480	11880000	0
+	3.16981	1.69911	3.24702	Q8LG92	Q8LG92	2938	At3g51660	LS1-like protein	Color2 [DarkGray]	1	4			peroxisome [GO:0005777]		+	7	7	7	63.4	63.4	63.4	12.21	0	115.6	5372800000	93	7938800	12750000	7349700	9610000	32368000	13128000	16394000	28348000	835460000	762330000	1075800000	674960000	31579000	158790000	136800000	95249000	203390000	105200000	242560000	291240000	171730000	155440000
+	1.46425	1.69737	3.24309	Q8RWV3	Q8RWV3	3009	CYCL1-1	Cyclin-L1-1	Color2 [DarkGray]	1	4		cell division [GO:0051301];meiotic cell cycle [GO:0051321];regulation of transcription by RNA polymerase II [GO:0006357];regulation of transcription, DNA-templated [GO:0006355];response to salt stress [GO:0009651]	host cell nucleus [GO:0042025];nucleus [GO:0005634];plasmodesma [GO:0009506]	cyclin-dependent protein serine/threonine kinase regulator activity [GO:0016538]	+	4	4	4	12.5	12.5	12.5	47.555	1	-2	9997800000	6	0	0	0	0	0	0	0	0	514220000	821840000	821140000	1277500000	269360000	355240000	432360000	695440000	310140000	365690000	309030000	228450000	587210000	700060000
+	6.25624	1.69448	3.2366	P24636	P24636	1670	TUBB4	Tubulin beta-4 chain	Color2 [DarkGray]	1	4		microtubule cytoskeleton organization [GO:0000226];microtubule-based process [GO:0007017];mitotic cell cycle [GO:0000278]	cell wall [GO:0005618];chloroplast stroma [GO:0009570];cytoplasm [GO:0005737];cytosol [GO:0005829];Golgi apparatus [GO:0005794];microtubule [GO:0005874];plasma membrane [GO:0005886];plasmodesma [GO:0009506];plastid [GO:0009536];tubulin complex [GO:0045298]	GTP binding [GO:0005525];GTPase activity [GO:0003924];structural constituent of cytoskeleton [GO:0005200]	+	46	46	18	87.4	87.4	36.7	49.823	0	323.31	485060000000	1436	58683000000	58237000000	48388000000	45368000000	56004000000	54592000000	54963000000	57109000000	3558100000	3203000000	3460900000	2847900000	3564300000	3856300000	4095500000	3944900000	1517000000	1002400000	1142900000	1287800000	5223700000	4168200000
+	1.73476	1.69267	3.23255	Q9LXJ0	Q9LXJ0	4834	FTSZ2-2	Cell division protein FtsZ homolog 2-2, chloroplastic	Color2 [DarkGray]	1	4		chloroplast fission [GO:0010020];chloroplast organization [GO:0009658];organelle fission [GO:0048285]	chloroplast [GO:0009507];chloroplast stroma [GO:0009570];chloroplast thylakoid [GO:0009534];chloroplast thylakoid membrane [GO:0009535];cytoplasm [GO:0005737];cytosol [GO:0005829];plastid stroma [GO:0009532];thylakoid membrane [GO:0042651]	GTP binding [GO:0005525];GTPase activity [GO:0003924];identical protein binding [GO:0042802];protein self-association [GO:0043621]	+	15	8	8	38.3	24.5	24.5	50.317	0	42.639	3387400000	63	94124000	60885000	61903000	78594000	91134000	128820000	102420000	93322000	224780000	213310000	218890000	192030000	110850000	142070000	157940000	178430000	132870000	53661000	188880000	126600000	178970000	163320000
+	4.8701	1.69267	3.23254	Q8L5Y6	Q8L5Y6	2772	CAND1	Cullin-associated NEDD8-dissociated protein 1	Color2 [DarkGray]	1	4		protein ubiquitination [GO:0016567];response to auxin [GO:0009733];SCF complex assembly [GO:0010265];vegetative to reproductive phase transition of meristem [GO:0010228];xylem and phloem pattern formation [GO:0010051]	cell wall [GO:0005618];cytosol [GO:0005829];nucleus [GO:0005634];plasma membrane [GO:0005886]		+	77	77	77	60.5	60.5	60.5	134.9	0	323.31	38231000000	558	4008500000	4264900000	2980300000	3083400000	4689700000	4757000000	4079500000	4607700000	411490000	326220000	392380000	351060000	260260000	376200000	343830000	269450000	167020000	161340000	213900000	208960000	555140000	569830000
+	2.73875	1.69227	3.23164	Q9C9P3	Q9C9P3	3811	F9E10.24	ADP-glucose pyrophosphorylase family protein	Color2 [DarkGray]	1	4		biosynthetic process [GO:0009058];regulation of L-ascorbic acid biosynthetic process [GO:2000082];response to cadmium ion [GO:0046686]	cytosol [GO:0005829];peroxisome [GO:0005777]	nucleotidyltransferase activity [GO:0016779]	+	33	33	29	73.5	73.5	69.9	45.563	0	234.58	62131000000	517	1972000000	1966600000	1246200000	1355800000	2041100000	1707300000	1796500000	2060400000	3397900000	2749500000	3708600000	3454400000	2516700000	2735200000	3075200000	2897200000	2459500000	1664100000	2474300000	2551000000	3921500000	3551400000
+	3.46373	1.69194	3.23091	A0A1I9LRJ6	A0A1I9LRJ6	61	At3g60370	Peptidylprolyl isomerase	Color2 [DarkGray]	1	4				peptidyl-prolyl cis-trans isomerase activity [GO:0003755]	+	9	9	9	33.9	33.9	33.9	30.385	0	24.962	2493200000	51	0	0	0	0	0	0	9910400	0	243860000	163680000	248160000	325080000	51658000	64637000	114490000	116620000	157060000	44445000	296970000	237630000	107970000	86080000
+	4.68814	1.69035	3.22736	Q9SEE5	Q9SEE5	5270	GAL1	Galactokinase	Color2 [DarkGray]	1	4		carbohydrate phosphorylation [GO:0046835];galactose metabolic process [GO:0006012]	cytosol [GO:0005829]	ATP binding [GO:0005524];galactokinase activity [GO:0004335];galactose binding [GO:0005534];metal ion binding [GO:0046872]	+	35	35	35	64.5	64.5	64.5	54.34	0	323.31	24986000000	337	2076900000	2497900000	1682000000	1747500000	2921500000	2884000000	2641800000	2756600000	290510000	329460000	338260000	284360000	320840000	385000000	393300000	445080000	63434000	94849000	81453000	75188000	768550000	562880000
+	3.0549	1.68805	3.2222	Q8L831	Q8L831	2825	NUDT3	Nudix hydrolase 3	Color2 [DarkGray]	1	4			cytoplasm [GO:0005737];cytosol [GO:0005829];mitochondrion [GO:0005739];vacuole [GO:0005773]	dipeptidyl-peptidase activity [GO:0008239];metal ion binding [GO:0046872]	+	65	65	65	69.9	69.9	69.9	86.856	0	323.31	52866000000	672	2417900000	2998700000	2098900000	2294800000	2436400000	2776100000	2726100000	2966000000	2377500000	2044700000	2416100000	1936300000	1363800000	1227400000	1183900000	1429300000	1878500000	1089700000	1956200000	1766200000	2292300000	2118600000
+	1.82296	1.68751	3.22101	Q9FN30	Q9FN30	4197	At5g53970	Probable aminotransferase TAT2	Color2 [DarkGray]	1	4		tyrosine catabolic process [GO:0006572];vitamin E biosynthetic process [GO:0010189]	cytosol [GO:0005829]	L-tyrosine:2-oxoglutarate aminotransferase activity [GO:0004838];pyridoxal phosphate binding [GO:0030170]	+	7	7	7	25.4	25.4	25.4	45.902	0	22.574	733160000	18	0	0	0	0	0	0	0	0	149790000	132250000	185900000	167210000	0	4859500	7679500	10357000	9751800	7346000	8683100	8388400	13802000	6692100
+	4.26392	1.68524	3.21594	Q93ZN2	Q93ZN2	3367	At1g60710	Probable aldo-keto reductase 4	Color2 [DarkGray]	1	4		response to cadmium ion [GO:0046686]	cytosol [GO:0005829];nucleus [GO:0005634]	oxidoreductase activity [GO:0016491]	+	41	41	24	74.2	74.2	53	37.924	0	233.98	75696000000	661	4919400000	5158500000	3776300000	3459000000	4274000000	4490700000	4016600000	3739900000	2848900000	2686300000	3362900000	3001700000	1813000000	2135000000	2229300000	1904000000	2724400000	1509800000	2588300000	2660800000	3322100000	2968000000
+	2.78793	1.68361	3.21231	Q9ZVA2	Q9ZVA2	5982	At1g78830	EP1-like glycoprotein 2	Color2 [DarkGray]	1	4			apoplast [GO:0048046];cell wall [GO:0005618];Golgi apparatus [GO:0005794];mitochondrion [GO:0005739];plant-type cell wall [GO:0009505];plasma membrane [GO:0005886];plasmodesma [GO:0009506];secretory vesicle [GO:0099503]	carbohydrate binding [GO:0030246]	+	41	41	26	67.5	67.5	51.6	50.342	0	323.31	81443000000	704	26571000	84224000	21630000	32864000	412860000	339010000	230020000	262980000	5860200000	5522000000	6743600000	6072800000	4223900000	4687300000	4386100000	4360300000	4415000000	3360500000	4889100000	5168400000	5302300000	4882300000
+	2.82486	1.68359	3.21227	P52422	P52422	1882	PUR3	Phosphoribosylglycinamide formyltransferase, chloroplastic	Color2 [DarkGray]	1	4		'de novo' IMP biosynthetic process [GO:0006189]	chloroplast [GO:0009507];cytoplasm [GO:0005737]	phosphoribosylglycinamide formyltransferase activity [GO:0004644]	+	21	21	21	62.3	62.3	62.3	32.17	0	104.43	9585200000	177	0	29833000	16042000	15271000	86348000	33904000	8674700	17863000	586840000	598660000	774890000	617260000	399040000	489350000	617500000	606030000	454720000	373220000	526520000	494040000	858540000	617200000
+	1.90468	1.68247	3.20976	Q9SU40;REV__Q8L7Y9	Q9SU40	5627	SKU5	Monocopper oxidase-like protein SKU5	Color2 [DarkGray]	1	4		cell tip growth [GO:0009932];iron ion homeostasis [GO:0055072];iron ion transport [GO:0006826]	anchored component of membrane [GO:0031225];anchored component of plasma membrane [GO:0046658];apoplast [GO:0048046];cell wall [GO:0005618];cytosol [GO:0005829];plant-type cell wall [GO:0009505];plasma membrane [GO:0005886];plasmodesma [GO:0009506];vacuolar membrane [GO:0005774]	copper ion binding [GO:0005507];ferroxidase activity [GO:0004322]	+	37	37	37	45.7	45.7	45.7	65.637	0	323.31	115590000000	687	772670000	654180000	721060000	640250000	899520000	1127500000	884850000	816970000	7479900000	6924800000	8809300000	6932600000	6024000000	6905300000	5893800000	7210600000	6307700000	5333000000	6346300000	6868700000	7919700000	5888300000
+	1.99218	1.68246	3.20976	Q66GI4	Q66GI4	2397	PRORP1	Proteinaceous RNase P 1, chloroplastic/mitochondrial	Color2 [DarkGray]	1	4		tRNA 5'-leader removal [GO:0001682];tRNA processing [GO:0008033]	chloroplast [GO:0009507];mitochondrion [GO:0005739];nucleus [GO:0005634]	metal ion binding [GO:0046872];ribonuclease P activity [GO:0004526]	+	19	19	19	26.7	26.7	26.7	64.876	0	44.645	2381200000	107	8821000	13012000	17424000	16153000	11372000	13468000	12595000	7631400	273980000	276190000	330900000	306510000	71172000	83301000	80265000	86948000	125850000	89214000	109090000	107280000	106510000	67547000
+	2.78438	1.67982	3.20388	P52901	P52901	1885	E1 ALPHA	Pyruvate dehydrogenase E1 component subunit alpha-1, mitochondrial	Color2 [DarkGray]	1	4		acetyl-CoA biosynthetic process from pyruvate [GO:0006086];glycolytic process [GO:0006096];response to cadmium ion [GO:0046686]	cytosol [GO:0005829];mitochondrial pyruvate dehydrogenase complex [GO:0005967];mitochondrion [GO:0005739];nucleus [GO:0005634]	pyruvate dehydrogenase (acetyl-transferring) activity [GO:0004739]	+	51	38	38	65.6	57.1	57.1	43.059	0	258.65	52620000000	457	1336700000	1517100000	955340000	1210500000	1967500000	2250400000	2044100000	2103100000	2851200000	2657600000	3392900000	2425000000	1693900000	2112900000	2332700000	2442700000	2017800000	1464000000	2330800000	2123500000	3281600000	2540000000
+	2.64922	1.67831	3.20052	B9DH75	B9DH75	449	At2g17320	AT2G17320 protein	Color2 [DarkGray]	1	4		coenzyme A biosynthetic process [GO:0015937]	cytosol [GO:0005829];nucleus [GO:0005634]	pantothenate kinase activity [GO:0004594]	+	15	5	5	39.6	13	13	40.071	0	10.11	442170000	15	0	0	0	0	0	3945800	0	0	45206000	41910000	51324000	32053000	36140000	8940600	36089000	32200000	13327000	11340000	6222200	5774400	41721000	13938000
+	2.08554	1.67735	3.19841	F4JRY9	F4JRY9	917	At4g31340	Myosin heavy chain-like protein	Color2 [DarkGray]	1	4			integral component of membrane [GO:0016021]		+	4	4	3	8.8	8.8	7.4	47.739	0	6.2619	466780000	19	25890000	65327000	21160000	40996000	78593000	81652000	34958000	47985000	12869000	11556000	21135000	12765000	0	0	0	0	0	0	5379300	0	0	0
+	4.54931	1.67683	3.19725	Q94K73	Q94K73	3577	At3g58140	Phenylalanine--tRNA ligase, chloroplastic/mitochondrial	Color2 [DarkGray]	1	4		phenylalanyl-tRNA aminoacylation [GO:0006432]	chloroplast [GO:0009507];chloroplast stroma [GO:0009570];cytoplasm [GO:0005737];cytosol [GO:0005829];mitochondrial matrix [GO:0005759];mitochondrion [GO:0005739]	ATP binding [GO:0005524];phenylalanine-tRNA ligase activity [GO:0004826];tRNA binding [GO:0000049]	+	36	36	36	53.4	53.4	53.4	49.251	0	243.34	32118000000	373	462760000	496530000	285980000	598020000	591610000	651340000	519880000	521740000	1971300000	1807000000	1950200000	1843000000	1310200000	1759500000	1687700000	1861500000	1296800000	715590000	1308200000	1305900000	2215500000	2225600000
+	3.73325	1.67587	3.19511	O23722	O23722	1258	MVD1	Diphosphomevalonate decarboxylase MVD1, peroxisomal	Color2 [DarkGray]	1	4		isopentenyl diphosphate biosynthetic process, mevalonate pathway [GO:0019287];sterol biosynthetic process [GO:0016126]	cytosol [GO:0005829];peroxisome [GO:0005777]	ATP binding [GO:0005524];diphosphomevalonate decarboxylase activity [GO:0004163];identical protein binding [GO:0042802]	+	37	37	25	79.4	79.4	62.1	45.585	0	323.31	92531000000	489	9512500000	9632400000	7699900000	7695100000	10426000000	10508000000	9602600000	10314000000	1319400000	1022300000	1241000000	1152500000	960050000	1167800000	1018500000	1152400000	837730000	674220000	1026700000	831440000	1240100000	1140300000
+	3.10648	1.67386	3.19067	Q8LPJ4	Q8LPJ4	2955	ABCE2	ABC transporter E family member 2	Color2 [DarkGray]	1	4		ribosomal subunit export from nucleus [GO:0000054];translational initiation [GO:0006413];translational termination [GO:0006415]	cytosol [GO:0005829];membrane [GO:0016020]	4 iron, 4 sulfur cluster binding [GO:0051539];ATP binding [GO:0005524];ATPase activity [GO:0016887];iron ion binding [GO:0005506];ribosomal small subunit binding [GO:0043024]	+	48	48	48	60	60	60	68.389	0	323.31	38119000000	450	2336900000	2533800000	3194200000	2070300000	4315800000	4606000000	4083100000	3038100000	849190000	643920000	865200000	780560000	501110000	905660000	779830000	671470000	848970000	458210000	927890000	537810000	636580000	804990000
+	2.27559	1.67183	3.18618	Q8LFS6	Q8LFS6	2933	BRN1	RNA-binding protein BRN1	Color2 [DarkGray]	1	4		flower development [GO:0009908];mRNA catabolic process [GO:0006402];plant-type hypersensitive response [GO:0009626];positive regulation of salicylic acid mediated signaling pathway [GO:0080151];regulation of photoperiodism, flowering [GO:2000028]	cytoplasm [GO:0005737];cytosol [GO:0005829];nucleus [GO:0005634];ribonucleoprotein complex [GO:1990904]	mRNA binding [GO:0003729];RNA binding [GO:0003723]	+	9	9	9	17.9	17.9	17.9	48.198	0	9.4515	1616300000	33	66447000	73840000	40986000	41484000	107530000	137080000	105000000	140910000	84205000	95368000	80238000	84601000	27207000	52121000	48922000	36130000	65672000	33160000	54241000	52829000	47786000	39934000
+	2.69887	1.67147	3.18539	Q9LRJ9	Q9LRJ9	4651	CRRSP38	Cysteine-rich repeat secretory protein 38	Color2 [DarkGray]	1	4		response to abscisic acid [GO:0009737]	cell wall [GO:0005618];cytosol [GO:0005829];extracellular region [GO:0005576];secretory vesicle [GO:0099503];vacuole [GO:0005773]		+	26	26	26	75.4	75.4	75.4	27.863	0	323.31	37937000000	336	61215000	41389000	49394000	28583000	46785000	27038000	24368000	176220000	3379500000	3104000000	3878600000	3322000000	1731300000	1601300000	1875800000	1906100000	1971700000	1018200000	2184900000	2495500000	2338600000	2305000000
+	2.0281	1.67059	3.18345	Q38896	Q38896	2149	CSP4	Cold shock domain-containing protein 4	Color2 [DarkGray]	1	4		embryo development ending in seed dormancy [GO:0009793];fruit development [GO:0010154];response to cold [GO:0009409]	cytosol [GO:0005829];nucleolus [GO:0005730];nucleus [GO:0005634]	DNA binding [GO:0003677];mRNA binding [GO:0003729];zinc ion binding [GO:0008270]	+	9	7	7	41.3	36.8	36.8	19.077	0	270.05	11666000000	96	859790000	1016700000	659970000	692460000	1691800000	1519900000	1741400000	1760000000	185610000	195690000	247040000	204650000	75852000	77799000	91841000	99787000	87973000	22945000	99288000	113850000	54896000	72205000
+	1.4532	1.66879	3.17948	Q9CAA4	Q9CAA4	3834	BIM2	Transcription factor BIM2	Color2 [DarkGray]	1	4		transcription, DNA-templated [GO:0006351]	nucleus [GO:0005634]	DNA binding [GO:0003677];DNA-binding transcription factor activity [GO:0003700];protein dimerization activity [GO:0046983]	+	3	3	3	6.1	6.1	6.1	34.487	0.0011278	2.4505	201650000	3	8869400	0	0	0	15403000	15912000	0	19661000	33117000	35984000	32662000	26911000	0	0	0	0	0	8380400	0	0	0	4745800
+	2.75891	1.66857	3.179	Q9FHR8	Q9FHR8	3987	DCI1	Delta(3,5)-Delta(2,4)-dienoyl-CoA isomerase, peroxisomal	Color2 [DarkGray]	1	4		fatty acid beta-oxidation [GO:0006635];fatty acid catabolic process [GO:0009062]	peroxisome [GO:0005777]	delta3,5-delta2,4-dienoyl-CoA isomerase activity [GO:0051750]	+	9	9	9	39.6	39.6	39.6	29.92	0	60.691	1846200000	73	90989000	82066000	50765000	42959000	65056000	88369000	63852000	74867000	142220000	126230000	117040000	108890000	59151000	71114000	54599000	63094000	70244000	50520000	74406000	54651000	76779000	71818000
+	1.97322	1.66795	3.17762	Q9FHA3	Q9FHA3	3975	POLA	DNA polymerase alpha catalytic subunit	Color2 [DarkGray]	1	4		lagging strand elongation [GO:0006273];leading strand elongation [GO:0006272];leaf morphogenesis [GO:0009965];mitotic DNA replication initiation [GO:1902975]	alpha DNA polymerase:primase complex [GO:0005658]	4 iron, 4 sulfur cluster binding [GO:0051539];chromatin binding [GO:0003682];DNA replication origin binding [GO:0003688];DNA-directed DNA polymerase activity [GO:0003887];metal ion binding [GO:0046872];purine nucleotide binding [GO:0017076];pyrimidine nucleotide binding [GO:0019103];single-stranded DNA binding [GO:0003697]	+	6	6	6	5.1	5.1	5.1	170.48	0	6.4334	575370000	7	27425000	44066000	53228000	46582000	69790000	67511000	30762000	28437000	13041000	13594000	19692000	74395000	0	0	7085200	4597100	0	0	0	13154000	0	14111000
+	1.68068	1.666	3.17335	Q9LZ83	Q9LZ83	4893	T32M21_20	AT5G04420 protein	Color2 [DarkGray]	1	4			cytosol [GO:0005829];nucleus [GO:0005634]		+	30	30	30	53.9	53.9	53.9	56.659	0	321.07	12335000000	206	1195800000	1382300000	978280000	1125300000	1423500000	1573300000	1270300000	1396900000	242140000	212480000	155810000	159740000	85899000	114220000	90289000	108770000	108860000	117310000	115200000	94703000	101790000	76272000
+	1.81759	1.66513	3.17141	A0A2H1ZEA9	A0A2H1ZEA9	341	At1g11860	Aminomethyltransferase	Color2 [DarkGray]	1	4		glycine catabolic process [GO:0006546]	mitochondrion [GO:0005739]	aminomethyltransferase activity [GO:0004047];transaminase activity [GO:0008483]	+	70	70	70	87.7	87.7	87.7	46.352	0	323.31	1615300000000	2772	4359500000	5934700000	4482800000	4325200000	6722200000	6870800000	6052000000	6569700000	106870000000	103800000000	110520000000	102350000000	87634000000	89234000000	97733000000	90023000000	94176000000	68750000000	100120000000	90214000000	116420000000	102390000000
+	1.37826	1.66438	3.16977	Q9C5F4	Q9C5F4	3670	At1g70570	Anthranilate phosphoribosyltransferase	Color2 [DarkGray]	1	4				transferase activity, transferring glycosyl groups [GO:0016757]	+	28	28	28	48.6	48.6	48.6	65.224	0	209.98	13287000000	320	458640000	452310000	367250000	368900000	561340000	470170000	497970000	477290000	532280000	484390000	808820000	809700000	372240000	517990000	470440000	400740000	538690000	496820000	550150000	663020000	795070000	664400000
+	3.32202	1.66426	3.1695	P29517	P29517	1707	TUBB9	Tubulin beta-9 chain	Color2 [DarkGray]	1	4		microtubule cytoskeleton organization [GO:0000226];microtubule-based process [GO:0007017];mitotic cell cycle [GO:0000278];response to cadmium ion [GO:0046686]	chloroplast [GO:0009507];cytoplasm [GO:0005737];cytosol [GO:0005829];Golgi apparatus [GO:0005794];microtubule [GO:0005874];plasma membrane [GO:0005886];plasmodesma [GO:0009506];tubulin complex [GO:0045298];vacuolar membrane [GO:0005774]	GTP binding [GO:0005525];GTPase activity [GO:0003924];mRNA binding [GO:0003729];structural constituent of cytoskeleton [GO:0005200]	+	42	9	9	87.4	23.4	23.4	49.657	0	323.31	24509000000	142	2846500000	2642800000	2290800000	2308400000	2730800000	2786700000	2579100000	3035600000	185690000	262880000	276830000	257990000	140010000	255820000	154170000	146630000	99962000	47619000	57088000	92100000	339960000	227850000
+	2.47359	1.66206	3.16469	Q9S841	Q9S841	5174	PSBO2	Oxygen-evolving enhancer protein 1-2, chloroplastic	Color2 [DarkGray]	1	4		photoinhibition [GO:0010205];photosynthesis, light reaction [GO:0019684];photosystem II assembly [GO:0010207];photosystem II stabilization [GO:0042549];regulation of protein dephosphorylation [GO:0035304]	chloroplast [GO:0009507];chloroplast stroma [GO:0009570];chloroplast thylakoid [GO:0009534];chloroplast thylakoid membrane [GO:0009535];cytosol [GO:0005829];photosystem II oxygen evolving complex [GO:0009654];plastoglobule [GO:0010287];thylakoid [GO:0009579];thylakoid lumen [GO:0031977]	oxygen evolving activity [GO:0010242];poly(U) RNA binding [GO:0008266]	+	45	21	21	69.2	61	61	35.019	0	323.31	48114000000	427	0	0	0	0	0	0	0	0	4300800000	4380400000	4526900000	4221100000	1745900000	1946000000	2080600000	2185100000	3080700000	1679900000	3373000000	3245600000	2978000000	2510600000
+	3.57914	1.6604	3.16105	Q9C5I1	Q9C5I1	3677	USP	UDP-sugar pyrophosphorylase	Color2 [DarkGray]	1	4		nucleotide-sugar biosynthetic process [GO:0009226];pollen development [GO:0009555];response to cadmium ion [GO:0046686];UDP-D-galactose metabolic process [GO:0052573];UDP-glucose metabolic process [GO:0006011];UDP-glucuronate metabolic process [GO:0046398];UDP-L-arabinose metabolic process [GO:0033356]	cytosol [GO:0005829];pollen tube [GO:0090406]	glucuronate-1-phosphate uridylyltransferase activity [GO:0047350];UTP:arabinose-1-phosphate uridylyltransferase activity [GO:0010491];UTP:galactose-1-phosphate uridylyltransferase activity [GO:0017103];UTP:glucose-1-phosphate uridylyltransferase activity [GO:0003983];UTP:xylose-1-phosphate uridylyltransferase activity [GO:0047338];UTP-monosaccharide-1-phosphate uridylyltransferase activity [GO:00…	+	39	39	39	59.8	59.8	59.8	67.851	0	232.72	24127000000	447	1296300000	1369800000	947100000	1047400000	928590000	1115700000	1106300000	1210200000	943440000	934320000	973400000	992300000	715930000	936520000	1042300000	1020800000	843780000	568350000	870010000	973060000	1261800000	988100000
+	2.45688	1.66037	3.16097	P29514	P29514	1704	TUBB6	Tubulin beta-6 chain	Color2 [DarkGray]	1	4		microtubule cytoskeleton organization [GO:0000226];microtubule-based process [GO:0007017];mitotic cell cycle [GO:0000278];response to cold [GO:0009409]	cytoplasm [GO:0005737];microtubule [GO:0005874];microtubule cytoskeleton [GO:0015630];plasma membrane [GO:0005886];plastid [GO:0009536]	GTP binding [GO:0005525];GTPase activity [GO:0003924];structural constituent of cytoskeleton [GO:0005200]	+	39	10	10	80.8	32.1	32.1	50.585	0	323.31	37054000000	130	3387300000	5621500000	3420700000	4303900000	4937100000	5146200000	3507800000	5305600000	123230000	112490000	165320000	114290000	0	95165000	110870000	125180000	29977000	0	28509000	36979000	141130000	114840000
+	2.91045	1.66004	3.16026	Q94CE5	Q94CE5	3533	POP2	Gamma-aminobutyrate transaminase POP2, mitochondrial	Color2 [DarkGray]	1	4		adaxial/abaxial axis specification [GO:0009943];beta-alanine catabolic process [GO:0019484];biotin biosynthetic process [GO:0009102];fruit development [GO:0010154];gamma-aminobutyric acid catabolic process [GO:0009450];gamma-aminobutyric acid metabolic process [GO:0009448];glutamate decarboxylation to succinate [GO:0006540];glutamate metabolic process [GO:0006536];glutamine metabolic process [GO:…	cytosol [GO:0005829];Golgi apparatus [GO:0005794];mitochondrion [GO:0005739];vacuolar membrane [GO:0005774]	4-aminobutyrate transaminase activity [GO:0003867];4-aminobutyrate:pyruvate transaminase activity [GO:0034387];adenosylmethionine-8-amino-7-oxononanoate transaminase activity [GO:0004015];cobalt ion binding [GO:0050897];gamma-aminobutyrate transaminase (glyoxylate dependent) activity [GO:0102351];pyridoxal phosphate binding [GO:0030170];zinc ion binding [GO:0008270]	+	48	48	48	87.3	87.3	87.3	55.187	0	323.31	199460000000	974	14860000000	15868000000	13370000000	12814000000	16052000000	17030000000	14966000000	16347000000	5876700000	4966500000	5917300000	4983800000	3407200000	4478900000	4390800000	4596000000	4581200000	3216800000	4625900000	4765400000	6314800000	5416400000
+	0.967091	1.65917	3.15835	Q9C5G6	Q9C5G6	3673	At1g23430	Peptidase C15, pyroglutamyl peptidase I-like protein	Color2 [DarkGray]	1	4		proteolysis [GO:0006508]	cytosol [GO:0005829]	pyroglutamyl-peptidase activity [GO:0016920]	+	26	26	25	85.3	85.3	79.7	23.618	0	244.73	48945000000	158	3479100000	4265300000	3092200000	4454000000	2450600000	3336400000	2801300000	2622900000	154820000	2756600000	79018000	2323000000	1289100000	18503000	13180000	26121000	0	1464900000	2303100000	2501500000	2142000000	1794300000
+	1.94768	1.65877	3.15748	O23290	O23290	1218	RPL36AA	60S ribosomal protein L36a	Color2 [DarkGray]	1	4		translation [GO:0006412]	cytosol [GO:0005829];cytosolic large ribosomal subunit [GO:0022625]	structural constituent of ribosome [GO:0003735]	+	20	20	20	78.1	78.1	78.1	12.125	0	74.046	46504000000	120	4539100000	5397200000	4430200000	4141400000	6589800000	6867100000	7018400000	7388500000	19056000	0	8021700	63573000	1221100	1394600	1272400	1488900	6230800	2452900	3514700	7857600	2182200	1656900
+	3.38526	1.65807	3.15594	Q93VB0	Q93VB0	3266	At2g40660	Nucleic acid-binding, OB-fold-like protein	Color2 [DarkGray]	1	4			cytosol [GO:0005829];plasmodesma [GO:0009506]	aminoacyl-tRNA ligase activity [GO:0004812];tRNA binding [GO:0000049]	+	38	38	38	81	81	81	42.088	0	323.31	22326000000	301	1710900000	1685500000	1449300000	1492000000	2372600000	2490800000	2293700000	2455000000	584700000	410470000	593670000	500740000	201560000	297940000	337530000	306200000	356780000	221980000	347750000	341760000	524320000	386060000
+	3.89634	1.65784	3.15543	Q8L9X1	Q8L9X1	2844	At5g20060	Alpha/beta-Hydrolases superfamily protein	Color2 [DarkGray]	1	4			plastid [GO:0009536]	hydrolase activity [GO:0016787]	+	13	13	13	29.4	29.4	29.4	26.727	0	71.31	22218000000	162	835660000	989740000	968930000	740480000	1053300000	1178800000	1227700000	1464900000	1192700000	975990000	1375300000	1213800000	505070000	643890000	686890000	724890000	836360000	510030000	850130000	935880000	772140000	829600000
+	3.53411	1.65487	3.14894	Q9M1Y7	Q9M1Y7	4994	F24G16.140	Uncharacterized protein F24G16.140	Color2 [DarkGray]	1	4			chloroplast [GO:0009507];chloroplast stroma [GO:0009570]		+	12	4	4	42.4	23.6	23.6	32.417	0	23.995	938330000	18	0	0	15398000	13012000	15718000	17545000	14763000	17632000	97910000	99018000	117770000	112620000	13462000	19463000	7457700	29435000	55223000	23722000	54996000	50613000	42500000	54408000
+	3.57518	1.6533	3.14552	Q56WN1	Q56WN1	2343	GLN1-1	Glutamine synthetase cytosolic isozyme 1-1	Color2 [DarkGray]	1	4		glutamine biosynthetic process [GO:0006542];leaf senescence [GO:0010150];nitrate assimilation [GO:0042128]	cell wall [GO:0005618];cytoplasm [GO:0005737];cytosol [GO:0005829];cytosolic ribosome [GO:0022626];plasma membrane [GO:0005886];plasmodesma [GO:0009506];plastid [GO:0009536]	ATP binding [GO:0005524];copper ion binding [GO:0005507];glutamate-ammonia ligase activity [GO:0004356]	+	40	19	18	84.8	58.4	58.4	39.115	0	323.31	57090000000	191	7762100000	8959400000	7010200000	6921500000	4215800000	4323200000	4702600000	3186700000	601000000	373320000	685660000	706730000	322250000	455230000	707750000	590800000	274080000	306300000	553400000	560650000	889460000	732150000
+	1.20102	1.65024	3.13885	A0A1I9LM56	A0A1I9LM56	23	BGAL2	Beta-galactosidase	Color2 [DarkGray]	1	4		carbohydrate metabolic process [GO:0005975]	integral component of membrane [GO:0016021]	beta-galactosidase activity [GO:0004565]	+	39	32	30	46.4	40.1	38	88.405	0	279.18	19124000000	242	70130000	63285000	410730000	34258000	51544000	95419000	74824000	71485000	1507000000	1278300000	1740700000	1405000000	820110000	674480000	1101600000	1123100000	873070000	745690000	782980000	954370000	1224100000	1291600000
+	1.69485	1.648	3.13399	Q9SIR5	Q9SIR5	5372	At2g25280	AmmeMemoRadiSam system protein B	Color2 [DarkGray]	1	4					+	23	23	23	87.3	87.3	87.3	32.644	0	110.35	13579000000	259	867590000	897120000	539400000	588460000	749420000	801270000	787480000	880090000	496920000	650830000	685140000	385360000	278670000	298840000	401430000	403440000	406710000	217720000	397030000	363950000	488570000	651680000
+	1.24854	1.64414	3.12561	Q9M1V2	Q9M1V2	4989	SOT5	Cytosolic sulfotransferase 5	Color2 [DarkGray]	1	4		flavonoid metabolic process [GO:0009812]	cytoplasm [GO:0005737]	flavonoid sulfotransferase activity [GO:1990135];sulfotransferase activity [GO:0008146]	+	14	12	12	51.4	48.9	48.9	37.501	0	40.768	1685100000	45	140020000	154310000	80697000	98550000	230110000	196200000	228990000	312560000	12415000	12243000	26089000	14202000	16467000	10962000	14443000	12923000	0	11808000	0	27696000	26512000	18525000
+	3.58829	1.64388	3.12504	O82782	O82782	1603	HISN3	1-(5-phosphoribosyl)-5-[(5-phosphoribosylamino)methylideneamino] imidazole-4-carboxamide isomerase, chloroplastic	Color2 [DarkGray]	1	4		histidine biosynthetic process [GO:0000105];tryptophan biosynthetic process [GO:0000162]	chloroplast [GO:0009507];cytoplasm [GO:0005737]	1-(5-phosphoribosyl)-5-[(5-phosphoribosylamino)methylideneamino]imidazole-4-carboxamide isomerase activity [GO:0003949]	+	15	15	15	39.5	39.5	39.5	33.365	0	57.869	5492400000	115	34247000	49114000	19948000	7545200	60012000	17326000	37535000	37857000	563750000	420740000	466680000	370360000	206920000	296140000	258930000	253680000	385090000	232430000	262050000	303250000	333930000	333270000
+	1.64347	1.64256	3.1222	Q93ZH7	Q93ZH7	3361	iqd2	AT5g03040/F15A17_70	Color2 [DarkGray]	1	4			plasma membrane [GO:0005886]		+	3	3	3	5.4	5.4	5.4	50.462	1	-2	2963300000	5	500580000	321050000	217190000	291940000	220750000	203590000	332470000	318570000	122030000	99512000	12494000	133940000	7963100	0	124320000	12937000	0	7282500	0	10910000	7715700	0
+	5.25512	1.6423	3.12162	Q94BU8	Q94BU8	3511	GSDA	Guanosine deaminase	Color2 [DarkGray]	1	4		purine nucleoside catabolic process [GO:0006152]	cytoplasm [GO:0005737];nucleus [GO:0005634]	guanosine deaminase activity [GO:0047974];zinc ion binding [GO:0008270]	+	16	16	16	91.4	91.4	91.4	20.001	0	201.31	19703000000	155	1356300000	1798000000	1407500000	1264600000	2252200000	2037400000	1929800000	1991600000	841120000	578990000	973770000	827380000	141460000	52442000	183470000	147130000	237970000	146870000	296060000	293540000	203470000	219630000
+	3.20304	1.64221	3.12144	F4HTQ1	F4HTQ1	547	At1g67690	Probable thimet oligopeptidase	Color2 [DarkGray]	1	4		peptide metabolic process [GO:0006518];proteolysis [GO:0006508]	cytoplasm [GO:0005737]	metal ion binding [GO:0046872];metalloendopeptidase activity [GO:0004222]	+	2	2	2	3.2	3.2	3.2	80.29	1	-2	498600000	2	152100000	77237000	38261000	30872000	53367000	5682700	48169000	71468000	5209900	2899500	3525600	3651500	2923800	0	3234600	0	0	0	0	0	0	0
+	1.25884	1.63894	3.11437	A4GNA8	A4GNA8	370	PSD3	Phosphatidylserine decarboxylase proenzyme 3	Color2 [DarkGray]	1	4		phosphatidylethanolamine biosynthetic process [GO:0006646];protein autoprocessing [GO:0016540]	cytosol [GO:0005829];endoplasmic reticulum [GO:0005783];endoplasmic reticulum membrane [GO:0005789]	calcium ion binding [GO:0005509];phosphatidylserine decarboxylase activity [GO:0004609]	+	9	9	9	18.9	18.9	18.9	70.352	0	4.3225	1800500000	21	134170000	119260000	54399000	79099000	126690000	805190000	103610000	143580000	31701000	24532000	21464000	18112000	18660000	22091000	15231000	0	17492000	0	0	11995000	21998000	20274000
+	1.51548	1.63582	3.10764	Q93VG3	Q93VG3	3271	At5g19120	AT5g19120/T24G5_20	Color2 [DarkGray]	1	4		cellular response to hypoxia [GO:0071456];protein catabolic process [GO:0030163];proteolysis [GO:0006508]		aspartic-type endopeptidase activity [GO:0004190]	+	2	2	2	6.7	6.7	6.7	40.704	0	9.0083	51682000	3	0	0	0	0	0	0	0	0	13527000	0	14859000	15491000	0	0	0	0	0	7805600	0	0	0	0
+	1.58959	1.63337	3.10236	A0A1P8AWV1	A0A1P8AWV1	162	YUP8H12R.14	Nitrobindin heme-binding domain protein	Color2 [DarkGray]	1	4					+	5	5	5	26.1	26.1	26.1	20.073	0	8.1764	940570000	27	74489000	116590000	44997000	85339000	77904000	65762000	29722000	84370000	18542000	18551000	34488000	43194000	12537000	10085000	25120000	35196000	34285000	10480000	20704000	32336000	30032000	14603000
+	1.27837	1.63171	3.0988	Q7Y175	Q7Y175	2515	PUX5	Plant UBX domain-containing protein 5	Color2 [DarkGray]	1	4		autophagosome assembly [GO:0000045];Golgi organization [GO:0007030];membrane fusion [GO:0061025];nuclear envelope reassembly [GO:0031468];proteasome-mediated ubiquitin-dependent protein catabolic process [GO:0043161]	cytosol [GO:0005829];nucleus [GO:0005634]	ATPase binding [GO:0051117];ubiquitin binding [GO:0043130]	+	17	17	17	47.5	47.5	47.5	44.996	0	153.96	9752600000	165	573910000	592560000	456120000	491250000	904560000	715760000	849340000	916560000	345280000	291670000	341810000	314380000	217300000	221100000	190860000	207760000	239700000	190640000	272530000	332230000	303890000	169330000
+	4.81027	1.6316	3.09857	Q8H0U4	Q8H0U4	2701	TRN1	Transportin-1	Color2 [DarkGray]	1	4		import into nucleus [GO:0051170];miRNA loading onto RISC involved in gene silencing by miRNA [GO:0035280];protein import into nucleus [GO:0006606]	cytoplasm [GO:0005737];cytosol [GO:0005829];nucleoplasm [GO:0005654];nucleus [GO:0005634]	nuclear import signal receptor activity [GO:0061608];nuclear localization sequence binding [GO:0008139];Ran GTPase binding [GO:0008536]	+	51	51	51	56.6	56.6	56.6	99.108	0	323.31	50701000000	585	4978700000	5232900000	4049700000	3949300000	5719000000	6070700000	5396800000	5484200000	595140000	455880000	737580000	527250000	387840000	417830000	437890000	484070000	250080000	192040000	227400000	282050000	1256900000	1097400000
+	1.61153	1.6306	3.09642	P53496	P53496	1887	ACT11	Actin-11	Color2 [DarkGray]	1	4			chloroplast envelope [GO:0009941];chloroplast stroma [GO:0009570];cytoplasm [GO:0005737];cytoskeleton [GO:0005856];cytosol [GO:0005829];mitochondrion [GO:0005739];plasma membrane [GO:0005886];plasmodesma [GO:0009506]	ATP binding [GO:0005524];structural constituent of cytoskeleton [GO:0005200]	+	44	5	5	83	21	21	41.674	0	123.64	5300500000	38	922960000	727680000	526940000	237640000	604870000	637810000	513310000	551880000	46693000	72743000	83705000	72859000	24787000	0	0	0	0	0	0	45044000	63314000	76729000
+	1.13759	1.62987	3.09485	Q9ZU48	Q9ZU48	5942	PDE331	Expressed protein	Color2 [DarkGray]	1	4			cytosol [GO:0005829];nucleus [GO:0005634]		+	12	12	11	19.2	19.2	18.3	77.337	0	69.297	8554500000	87	794920000	786810000	608920000	656820000	740790000	857130000	814190000	843700000	252930000	390980000	220280000	188430000	102550000	123720000	95089000	165270000	137880000	34089000	133550000	132120000	144380000	96735000
+	1.65575	1.62959	3.09425	Q8RX04	Q8RX04	3018	At5g49215	Pectin lyase-like superfamily protein	Color2 [DarkGray]	1	4		carbohydrate metabolic process [GO:0005975]		lyase activity [GO:0016829];polygalacturonase activity [GO:0004650]	+	7	5	5	25.6	23.8	23.8	48.758	0	90.996	2881000000	41	40106000	46991000	9962500	24170000	26327000	39433000	39842000	33124000	183840000	169370000	215020000	84610000	237760000	157720000	161050000	152820000	107620000	108920000	112950000	145830000	246820000	197600000
+	1.04175	1.62958	3.09422	Q8L5Z7	Q8L5Z7	2778	SNX2A	Sorting nexin 2A	Color2 [DarkGray]	1	4		developmental process [GO:0032502];protein maturation [GO:0051604];protein transport [GO:0015031];seedling development [GO:0090351]	cytosol [GO:0005829];Golgi apparatus [GO:0005794];multivesicular body membrane [GO:0032585];plastid [GO:0009536];retromer complex [GO:0030904]	phosphatidylinositol binding [GO:0035091];protein self-association [GO:0043621]	+	15	15	13	29.1	29.1	24.5	65.527	0	77.951	3342000000	77	303440000	291970000	235380000	196810000	370480000	371380000	354430000	381660000	87133000	64370000	77623000	91660000	34706000	40180000	51078000	57363000	35334000	31748000	39697000	63639000	60099000	28052000
+	4.49246	1.62942	3.09389	Q9SH69	Q9SH69	5325	PGD1	6-phosphogluconate dehydrogenase, decarboxylating 1, chloroplastic	Color2 [DarkGray]	1	4		D-gluconate catabolic process [GO:0046177];pentose-phosphate shunt, oxidative branch [GO:0009051]	chloroplast [GO:0009507];chloroplast stroma [GO:0009570];cytosol [GO:0005829];plastid [GO:0009536];secretory vesicle [GO:0099503]	NADP binding [GO:0050661];phosphogluconate 2-dehydrogenase activity [GO:0008114];phosphogluconate dehydrogenase (decarboxylating) activity [GO:0004616]	+	53	27	27	84.2	42.9	42.9	53.377	0	323.31	35575000000	311	2839600000	3328300000	2712100000	2780900000	3920500000	4487600000	4265900000	4485900000	348030000	300570000	253630000	349730000	418530000	284180000	353400000	409880000	113350000	136690000	118610000	206520000	809310000	789050000
+	1.90916	1.62815	3.09117	Q9T0A7	Q9T0A7	5804	UGE2	UDP-glucose 4-epimerase 2	Color2 [DarkGray]	1	4		cell wall biogenesis [GO:0042546];cell wall organization [GO:0071555];galactose metabolic process [GO:0006012];rRNA processing [GO:0006364]	cytosol [GO:0005829]	RNA binding [GO:0003723];UDP-glucose 4-epimerase activity [GO:0003978]	+	11	8	5	36	30.9	20.6	38.382	0	20.982	4307700000	80	315360000	349100000	307130000	259670000	226640000	189870000	202860000	183820000	133500000	157080000	149370000	162880000	101600000	121040000	138550000	138580000	110710000	69569000	59431000	90001000	208080000	212230000
+	3.17905	1.62561	3.08572	F4JN13	F4JN13	895	AKR2	Ankyrin repeat-containing protein 2	Color2 [DarkGray]	1	4		defense response to bacterium, incompatible interaction [GO:0009816];post-embryonic development [GO:0009791];protein folding [GO:0006457];protein targeting to chloroplast [GO:0045036];response to cadmium ion [GO:0046686];vegetative to reproductive phase transition of meristem [GO:0010228]	chloroplast [GO:0009507];cytoplasm [GO:0005737];integral component of chloroplast outer membrane [GO:0031359];nucleus [GO:0005634];plasma membrane [GO:0005886]		+	27	27	23	76.9	76.9	66.9	38.056	0	323.31	31905000000	394	179360000	214860000	122500000	147890000	353390000	327020000	339110000	352180000	2508100000	2438000000	2833700000	2464400000	1233700000	1569500000	1569100000	1598900000	1914100000	1122200000	2028100000	1837200000	1551700000	1718500000
+	1.67281	1.6248	3.08399	F4K464	F4K464	994	At5g20190	Tetratricopeptide repeat (TPR)-like superfamily protein	Color2 [DarkGray]	1	4					+	2	2	2	10.3	10.3	10.3	31.819	0	4.056	475440000	46	16539000	23686000	17735000	15940000	25394000	24293000	20700000	22831000	20039000	22670000	26818000	23480000	15183000	19241000	21226000	15819000	16306000	9158700	16208000	15846000	16706000	24153000
+	1.52449	1.6219	3.07781	F4JBV0	F4JBV0	821	At3g60510	ATP-dependent caseinolytic (Clp) protease/crotonase family protein	Color2 [DarkGray]	1	4				3-hydroxyisobutyryl-CoA hydrolase activity [GO:0003860];peptidase activity [GO:0008233]	+	6	6	6	19.7	19.7	19.7	47.43	0	13.29	598460000	18	0	0	0	0	17067000	9354000	0	9318400	91975000	62006000	118710000	58062000	9474000	20581000	11774000	6981800	23107000	11269000	0	30097000	22727000	11488000
+	4.12454	1.62151	3.07698	Q9SIE1	Q9SIE1	5357	PAT	Bifunctional aspartate aminotransferase and glutamate/aspartate-prephenate aminotransferase	Color2 [DarkGray]	1	4		aromatic amino acid family biosynthetic process, prephenate pathway [GO:0009095];embryo development ending in seed dormancy [GO:0009793];L-phenylalanine biosynthetic process [GO:0009094]	chloroplast [GO:0009507];chloroplast stroma [GO:0009570]	aspartate-prephenate aminotransferase activity [GO:0033853];glutamate-prephenate aminotransferase activity [GO:0033854];L-aspartate:2-oxoglutarate aminotransferase activity [GO:0004069];pyridoxal phosphate binding [GO:0030170]	+	33	33	33	64.2	64.2	64.2	50.999	0	278.43	22410000000	268	1774500000	1919300000	1272200000	1628300000	1603300000	1394200000	1599500000	1565200000	449530000	549160000	646120000	683310000	411740000	497300000	555540000	573630000	396790000	171670000	472260000	1136800000	742140000	738400000
+	2.91726	1.62112	3.07613	Q84TI2	Q84TI2	2576	At2g37690	Phosphoribosylaminoimidazole carboxylase like protein	Color2 [DarkGray]	1	4		'de novo' IMP biosynthetic process [GO:0006189];pollen development [GO:0009555]	chloroplast [GO:0009507];chloroplast stroma [GO:0009570]	ATP binding [GO:0005524];metal ion binding [GO:0046872];phosphoribosylaminoimidazole carboxylase activity [GO:0004638]	+	41	41	41	66	66	66	69.751	0	323.31	15275000000	210	1733700000	1408700000	1313600000	1314400000	2512300000	2281200000	2166300000	2169400000	53424000	47747000	60733000	26153000	5782900	12821000	9730700	18531000	1082100	0	5302000	4334300	17612000	21803000
+	1.47681	1.6205	3.07482	Q9LNU4	Q9LNU4	4600	RPN3A	26S proteasome non-ATPase regulatory subunit 3 homolog A	Color2 [DarkGray]	1	4		regulation of protein catabolic process [GO:0042176];ubiquitin-dependent protein catabolic process [GO:0006511]	cytosol [GO:0005829];nucleus [GO:0005634];plasma membrane [GO:0005886];plasmodesma [GO:0009506];proteasome complex [GO:0000502];proteasome regulatory particle, lid subcomplex [GO:0008541]	enzyme regulator activity [GO:0030234]	+	38	38	18	71.3	71.3	40.2	55.582	0	323.31	24068000000	260	2571600000	2729000000	2400200000	2188900000	3451800000	3631800000	2912500000	3249300000	117090000	50081000	161820000	164600000	29823000	29581000	2156900	35032000	0	13983000	9080000	170810000	32211000	18024000
+	1.87694	1.61992	3.07359	Q9SG92	Q9SG92	5305	MES17	Methylesterase 17	Color2 [DarkGray]	1	4		indoleacetic acid conjugate metabolic process [GO:0033473];jasmonic acid metabolic process [GO:0009694];salicylic acid metabolic process [GO:0009696];shoot system development [GO:0048367]		hydrolase activity [GO:0016787];hydrolase activity, acting on ester bonds [GO:0016788];methyl indole-3-acetate esterase activity [GO:0080030];methyl jasmonate esterase activity [GO:0080032];methyl salicylate esterase activity [GO:0080031]	+	1	1	1	4.3	4.3	4.3	30.867	0.0014853	2.2603	149390000	3	0	0	0	0	0	0	0	0	17701000	16480000	19984000	22640000	0	9151200	8999800	0	0	0	0	0	12092000	13220000
+	3.24912	1.61959	3.07288	Q56Y85	Q56Y85	2350	MAP2B	Methionine aminopeptidase 2B	Color2 [DarkGray]	1	4		protein initiator methionine removal [GO:0070084];protein processing [GO:0016485]	cytoplasm [GO:0005737];cytosol [GO:0005829]	metal ion binding [GO:0046872];metalloaminopeptidase activity [GO:0070006]	+	26	26	21	54.7	54.7	46.5	49.059	0	183.92	17608000000	334	758140000	716500000	531040000	557700000	1155500000	1319600000	1007900000	939290000	773030000	688640000	824320000	725980000	475320000	496550000	516140000	473340000	486640000	332970000	479720000	573890000	936080000	900820000
+	3.49738	1.61805	3.0696	B9DHQ0	B9DHQ0	453	TUBA5	Tubulin alpha-5 chain	Color2 [DarkGray]	1	4		microtubule-based process [GO:0007017]	cytoplasm [GO:0005737];microtubule [GO:0005874]	GTP binding [GO:0005525];GTPase activity [GO:0003924];structural constituent of cytoskeleton [GO:0005200]	+	45	16	14	74.9	41.8	33.3	49.654	0	323.31	98789000000	551	8378700000	9083000000	7290600000	6937900000	9784100000	9726800000	8176700000	8636600000	1680400000	1818900000	2063300000	2399100000	1659000000	1734800000	2116100000	2104800000	1048900000	607650000	1100400000	1240800000	2681300000	2508600000
+	1.83423	1.61737	3.06815	O82399	O82399	1583	PMDH1	Malate dehydrogenase 1, peroxisomal	Color2 [DarkGray]	1	4		glyoxylate cycle [GO:0006097];malate metabolic process [GO:0006108];regulation of fatty acid beta-oxidation [GO:0031998];regulation of photorespiration [GO:0080093];tricarboxylic acid cycle [GO:0006099]	chloroplast [GO:0009507];cytoplasm [GO:0005737];peroxisome [GO:0005777]	L-malate dehydrogenase activity [GO:0030060]	+	27	26	26	83.6	83.6	83.6	37.465	0	323.31	47767000000	496	2699500000	2398000000	1452200000	1603200000	2440100000	2608500000	2353900000	2177800000	2070700000	2501000000	2779200000	2543100000	1093900000	1261100000	1354900000	1433100000	1835900000	1173000000	1889200000	2095300000	1807300000	1627800000
+	3.84019	1.61651	3.06633	O49305	O49305	1317	At1g23120	At1g23120	Color2 [DarkGray]	1	4		defense response [GO:0006952]			+	2	2	2	11.5	11.5	11.5	17.322	0.004366	1.9007	436320000	5	71529000	0	36162000	54409000	9586300	63508000	51330000	9099800	27920000	23289000	34168000	32312000	0	0	0	0	4212800	7626700	5042300	6121000	0	0
+	1.85784	1.61341	3.05973	Q9FMN0	Q9FMN0	4175	SCP2	Sterol carrier protein 2	Color2 [DarkGray]	1	4		fatty acid beta-oxidation [GO:0006635];glyoxylate metabolic process [GO:0046487];intracellular lipid transport [GO:0032365];response to absence of light [GO:0009646];response to sucrose [GO:0009744];seed germination [GO:0009845];seed morphogenesis [GO:0048317]	cytosol [GO:0005829];peroxisome [GO:0005777]		+	9	9	9	65	65	65	13.568	0	23.98	1971600000	75	101800000	102730000	29532000	33432000	57911000	143900000	181680000	120700000	119500000	129920000	140120000	60195000	53213000	42004000	43663000	85227000	60528000	22730000	35899000	65145000	148570000	44805000
+	2.06216	1.61248	3.05777	Q9SLK0	Q9SLK0	5472	ICDH	Peroxisomal isocitrate dehydrogenase [NADP]	Color2 [DarkGray]	1	4		isocitrate metabolic process [GO:0006102];NADP metabolic process [GO:0006739];tricarboxylic acid cycle [GO:0006099]	mitochondrion [GO:0005739];nucleus [GO:0005634];peroxisome [GO:0005777];plasma membrane [GO:0005886]	isocitrate dehydrogenase (NADP+) activity [GO:0004450];magnesium ion binding [GO:0000287];NAD binding [GO:0051287]	+	38	26	26	63.7	48.3	48.3	47.234	0	73.348	9411400000	155	890980000	834400000	709950000	713700000	787690000	626730000	773720000	720080000	251830000	228200000	217640000	248910000	182900000	200770000	172200000	194500000	189770000	111180000	186560000	168620000	292530000	250470000
+	1.22287	1.61124	3.05514	Q9M5K3	Q9M5K3	5053	LPD1	Dihydrolipoyl dehydrogenase 1, mitochondrial	Color2 [DarkGray]	1	4		cell redox homeostasis [GO:0045454];oxidation-reduction process [GO:0055114];response to cadmium ion [GO:0046686]	apoplast [GO:0048046];mitochondrial matrix [GO:0005759];mitochondrial respiratory chain complex I [GO:0005747];mitochondrion [GO:0005739];nucleus [GO:0005634];oxoglutarate dehydrogenase complex [GO:0045252]	ATP binding [GO:0005524];cobalt ion binding [GO:0050897];copper ion binding [GO:0005507];dihydrolipoyl dehydrogenase activity [GO:0004148];flavin adenine dinucleotide binding [GO:0050660];zinc ion binding [GO:0008270]	+	80	80	56	83.4	83.4	78.7	53.987	0	323.31	820080000000	2518	12236000000	14870000000	11262000000	10657000000	14242000000	14042000000	13004000000	13178000000	47754000000	40460000000	53557000000	46586000000	36878000000	41286000000	41902000000	41596000000	45359000000	30020000000	46453000000	46668000000	53829000000	47890000000
+	2.52109	1.60984	3.05218	Q9LIB2	Q9LIB2	4472	PHS1	Alpha-glucan phosphorylase 1	Color2 [DarkGray]	1	4		glycogen catabolic process [GO:0005980];response to temperature stimulus [GO:0009266];response to water deprivation [GO:0009414]	chloroplast [GO:0009507];chloroplast stroma [GO:0009570];cytoplasm [GO:0005737];cytosol [GO:0005829];plastid [GO:0009536]	1,4-alpha-oligoglucan phosphorylase activity [GO:0004645];glycogen phosphorylase activity [GO:0008184];linear malto-oligosaccharide phosphorylase activity [GO:0102250];pyridoxal phosphate binding [GO:0030170];SHG alpha-glucan phosphorylase activity [GO:0102499]	+	77	77	76	64.4	64.4	62.8	108.58	0	323.31	58679000000	952	562390000	488820000	481700000	429120000	862940000	691820000	850400000	918270000	3364200000	3301100000	4109800000	3293900000	2988400000	3266200000	3027200000	3534500000	2869300000	2007700000	2722200000	3216300000	4068300000	4006400000
+	1.56877	1.60934	3.05112	Q9FY99	Q9FY99	4320	G6PD2	Glucose-6-phosphate 1-dehydrogenase 2, chloroplastic	Color2 [DarkGray]	1	4		glucose metabolic process [GO:0006006];pentose-phosphate shunt, oxidative branch [GO:0009051]	chloroplast [GO:0009507];chloroplast stroma [GO:0009570]	glucose-6-phosphate dehydrogenase activity [GO:0004345];NADP binding [GO:0050661]	+	59	25	25	67.4	33.6	33.6	67.159	0	323.31	23631000000	194	3279200000	3003300000	2238000000	2296100000	3708400000	2929900000	3153400000	2941400000	7243400	16171000	6822100	16955000	0	5982400	0	0	9207800	7632500	11239000	0	0	0
+	8.31963	1.60875	3.04988	Q38946	Q38946	2165	GDH2	Glutamate dehydrogenase 2	Color2 [DarkGray]	1	4		glutamate catabolic process [GO:0006538];response to cadmium ion [GO:0046686]	mitochondrion [GO:0005739];plasma membrane [GO:0005886];vacuolar membrane [GO:0005774]	ATP binding [GO:0005524];cobalt ion binding [GO:0050897];copper ion binding [GO:0005507];glutamate dehydrogenase (NAD+) activity [GO:0004352];glutamate dehydrogenase [NAD(P)+] activity [GO:0004353];zinc ion binding [GO:0008270]	+	48	48	37	83.9	83.9	77.1	44.699	0	323.31	208090000000	898	11413000000	11518000000	9641200000	9111100000	28402000000	26873000000	25085000000	26062000000	10528000000	9459000000	10218000000	10879000000	969370000	1027600000	1102200000	947320000	2241100000	1277700000	2165100000	2738800000	1718100000	1643800000
+	3.72121	1.60807	3.04843	P34791	P34791	1733	CYP20-3	Peptidyl-prolyl cis-trans isomerase CYP20-3, chloroplastic	Color2 [DarkGray]	1	4		protein folding [GO:0006457];protein peptidyl-prolyl isomerization [GO:0000413]	chloroplast stroma [GO:0009570];cytoplasm [GO:0005737];cytosolic ribosome [GO:0022626]	cyclosporin A binding [GO:0016018];peptidyl-prolyl cis-trans isomerase activity [GO:0003755]	+	29	29	28	70.4	70.4	70.4	28.208	0	323.31	1161000000000	2972	1304900000	1320100000	919160000	968590000	1840400000	1720600000	1372300000	1652200000	81803000000	80855000000	88755000000	81047000000	57675000000	66900000000	64232000000	66546000000	74593000000	52854000000	69799000000	70997000000	79176000000	74205000000
+	1.81518	1.60663	3.0454	Q94JV1	Q94JV1	3558	At1g69340	Appr-1-p processing enzyme family protein	Color2 [DarkGray]	1	4			mitochondrion [GO:0005739]		+	9	9	9	18.7	18.7	18.7	63.304	0	54.86	2622900000	46	154620000	158890000	119970000	139500000	232770000	164500000	122480000	144650000	99047000	126090000	125400000	153490000	36877000	51386000	74364000	92907000	130980000	40620000	86158000	85791000	72622000	72212000
+	2.71761	1.60542	3.04285	Q0WNZ5	Q0WNZ5	2061	MS3	5-methyltetrahydropteroyltriglutamate--homocysteine methyltransferase 3, chloroplastic	Color2 [DarkGray]	1	4		methionine biosynthetic process [GO:0009086];methylation [GO:0032259]	chloroplast [GO:0009507];cytosol [GO:0005829];extracellular region [GO:0005576]	5-methyltetrahydropteroyltriglutamate-homocysteine S-methyltransferase activity [GO:0003871];methionine synthase activity [GO:0008705];zinc ion binding [GO:0008270]	+	36	24	24	36.1	25.7	25.7	90.593	0	56.748	5456700000	184	118110000	155050000	56437000	96135000	73686000	123050000	148980000	138980000	284270000	300560000	278380000	286770000	301310000	203700000	267140000	190730000	182020000	165360000	218570000	201480000	485030000	374980000
+	2.43955	1.60248	3.03664	P57750	P57750	1930	DRT101	Phosphoacetylglucosamine mutase	Color2 [DarkGray]	1	4		carbohydrate metabolic process [GO:0005975];DNA repair [GO:0006281];UDP-N-acetylglucosamine biosynthetic process [GO:0006048]	cytosol [GO:0005829];mitochondrion [GO:0005739];plasmodesma [GO:0009506]	metal ion binding [GO:0046872];phosphoacetylglucosamine mutase activity [GO:0004610]	+	21	21	21	43.7	43.7	43.7	60.39	0	78.268	6635300000	148	438020000	453940000	432350000	352650000	586300000	650340000	563560000	584240000	235590000	110390000	267460000	169300000	116800000	96021000	150430000	218360000	164000000	71403000	131850000	98420000	203970000	178510000
+	1.96409	1.60175	3.03511	O49339;Q8H1G6;Q9ZW72	O49339;Q8H1G6	1318	PTI12;PTI11	PTI1-like tyrosine-protein kinase 2;PTI1-like tyrosine-protein kinase 1	Color2 [DarkGray]	1	4		defense response [GO:0006952];protein phosphorylation [GO:0006468]	peroxisome [GO:0005777];plasma membrane [GO:0005886];plasmodesma [GO:0009506]	ATP binding [GO:0005524];non-membrane spanning protein tyrosine kinase activity [GO:0004715];protein kinase binding [GO:0019901];transmembrane receptor protein serine/threonine kinase activity [GO:0004675]	+	5	5	3	20.2	20.2	15.3	40.5	0	9.3105	678460000	14	108010000	108070000	14803000	32330000	70314000	89223000	77492000	64218000	17672000	13908000	27043000	22978000	0	0	5281900	0	0	0	0	6715600	0	6405700
+	3.82352	1.60161	3.03482	Q6DBH4	Q6DBH4	2434	At2g23820	At2g23820	Color2 [DarkGray]	1	4			cytoplasm [GO:0005737];cytosol [GO:0005829]	5'-deoxynucleotidase activity [GO:0002953]	+	10	10	10	33.1	33.1	33.1	28.381	0	21.272	1878600000	53	25574000	16244000	6688900	9078800	13164000	31634000	30911000	25547000	195510000	196970000	233640000	130050000	70470000	59797000	30589000	92358000	77615000	20229000	83574000	76356000	137070000	51477000
+	2.78766	1.59942	3.03022	Q9SA18	Q9SA18	5186	AKHSDH1	Bifunctional aspartokinase/homoserine dehydrogenase 1, chloroplastic	Color2 [DarkGray]	1	4		aspartate family amino acid biosynthetic process [GO:0009067];homoserine biosynthetic process [GO:0009090];lysine biosynthetic process via diaminopimelate [GO:0009089];methionine biosynthetic process [GO:0009086];threonine biosynthetic process [GO:0009088]	chloroplast [GO:0009507];chloroplast stroma [GO:0009570];cytosol [GO:0005829]	aspartate kinase activity [GO:0004072];ATP binding [GO:0005524];homoserine dehydrogenase activity [GO:0004412];NADP binding [GO:0050661]	+	63	63	53	61.9	61.9	50.7	99.403	0	323.31	43678000000	633	2651300000	2772300000	1839700000	2159700000	3271900000	3524600000	3107600000	3557600000	1333600000	1132400000	1598400000	1401500000	993330000	913970000	1236200000	1290800000	784960000	510460000	939030000	875590000	2098100000	1746200000
+	2.39334	1.59299	3.01674	Q9LYG2	Q9LYG2	4866	At5g11680	Classical AGP protein	Color2 [DarkGray]	1	4		positive regulation of transcription, DNA-templated [GO:0045893]	nucleus [GO:0005634];plasma membrane [GO:0005886]	chromatin DNA binding [GO:0031490];transcription coactivator activity [GO:0003713]	+	9	9	9	69.6	69.6	69.6	23.106	0	61.954	9480800000	133	298490000	372140000	381330000	270500000	432320000	403270000	441860000	493280000	520950000	485620000	663470000	411860000	253760000	309760000	312730000	244680000	463150000	272940000	398420000	387890000	410130000	358890000
+	4.9051	1.59097	3.01251	P57751	P57751	1931	UGP1	UTP--glucose-1-phosphate uridylyltransferase 1	Color2 [DarkGray]	1	4		callose deposition in cell wall [GO:0052543];glycogen metabolic process [GO:0005977];pollen development [GO:0009555];positive regulation of cell death [GO:0010942];response to cadmium ion [GO:0046686];UDP-glucose metabolic process [GO:0006011]	cytoplasm [GO:0005737];cytosol [GO:0005829];plasma membrane [GO:0005886];plastid [GO:0009536]	UTP:glucose-1-phosphate uridylyltransferase activity [GO:0003983]	+	67	30	30	87.9	48.7	48.7	51.919	0	279.93	29704000000	362	408380000	458970000	354190000	318750000	467180000	574070000	489290000	387280000	2143300000	1939900000	2240800000	1891600000	996480000	875890000	1246100000	1226500000	1812300000	977720000	1659100000	1718900000	2018800000	1917300000
+	1.27851	1.58858	3.00753	F4IMH3	F4IMH3	701	NOC4	Protein NUCLEOLAR COMPLEX ASSOCIATED 4	Color2 [DarkGray]	1	4		embryo development ending in seed dormancy [GO:0009793];rRNA processing [GO:0006364]	integral component of membrane [GO:0016021];Noc4p-Nop14p complex [GO:0030692];nuclear membrane [GO:0031965];nucleolus [GO:0005730];nucleoplasm [GO:0005654];small-subunit processome [GO:0032040]		+	4	4	4	8.1	8.1	8.1	65.348	0	11.109	344650000	12	14507000	12154000	13685000	11081000	36785000	51779000	47569000	52298000	18781000	41539000	34156000	0	0	0	0	0	0	0	0	0	10317000	0
+	1.33195	1.5856	3.00134	Q93ZE5	Q93ZE5	3354	FAHD1	Probable acylpyruvase FAHD1, mitochondrial	Color2 [DarkGray]	1	4			cytosol [GO:0005829];mitochondrion [GO:0005739]	acetylpyruvate hydrolase activity [GO:0018773];acylpyruvate hydrolase activity [GO:0047621];copper ion binding [GO:0005507];hydrolase activity [GO:0016787]	+	4	4	4	15.7	15.7	15.7	24.283	0	3.1127	532260000	12	21427000	26536000	0	15993000	6713200	9970200	17778000	0	40174000	36310000	29514000	47313000	23765000	37739000	34879000	16345000	8240400	22591000	20625000	19129000	21995000	4994200
+	1.64341	1.5852	3.00049	Q9LML6	Q9LML6	4575	UGT71C4	Flavonol 3-O-glucosyltransferase UGT71C4	Color2 [DarkGray]	1	4			intracellular membrane-bounded organelle [GO:0043231]	daphnetin 3-O-glucosyltransferase activity [GO:0102360];flavonol 3-O-glucosyltransferase activity [GO:0047893];flavonol 7-O-beta-glucosyltransferase activity [GO:0033836];myricetin 3-O-glucosyltransferase activity [GO:0102425];quercetin 3-O-glucosyltransferase activity [GO:0080043];quercetin 7-O-glucosyltransferase activity [GO:0080044];UDP-glucosyltransferase activity [GO:0035251];UDP-glycosyltr…	+	23	23	23	53.4	53.4	53.4	52.843	0	106.94	4946100000	139	391460000	364620000	347860000	232980000	479540000	512420000	415850000	438410000	87779000	60923000	87708000	130820000	90899000	116730000	94314000	99574000	23662000	22784000	35184000	0	251430000	201040000
+	1.69063	1.58303	2.99598	Q9ZQH3	Q9ZQH3	5901	At2g27460	At2g27460	Color2 [DarkGray]	1	4		anther wall tapetum development [GO:0048658];endoplasmic reticulum to Golgi vesicle-mediated transport [GO:0006888];intracellular protein transport [GO:0006886];pollen exine formation [GO:0010584]	COPII vesicle coat [GO:0030127];cytoplasm [GO:0005737];endoplasmic reticulum exit site [GO:0070971]	zinc ion binding [GO:0008270]	+	14	14	14	24.8	24.8	24.8	82.584	0	74.905	6209600000	162	502920000	583830000	414720000	485150000	573540000	699510000	608010000	607660000	82717000	144430000	124190000	116540000	98388000	85593000	103680000	130110000	84431000	39032000	75357000	95080000	132720000	124380000
+	1.10643	1.58196	2.99376	F4KGQ0	F4KGQ0	1059	FBA4	Fructose-bisphosphate aldolase 4, cytosolic	Color2 [DarkGray]	1	4		fructose 1,6-bisphosphate metabolic process [GO:0030388];gluconeogenesis [GO:0006094];glycolytic process [GO:0006096]	cytosol [GO:0005829]	fructose-bisphosphate aldolase activity [GO:0004332]	+	21	14	14	51.4	42.7	42.7	42.906	0	27.497	4169900000	84	15173000	48935000	26419000	16204000	6224600	0	0	0	178020000	121180000	366300000	545100000	86013000	167490000	126500000	144390000	152750000	99718000	273080000	344160000	141730000	327260000
+	2.49558	1.58152	2.99286	Q9FMF1	Q9FMF1	4165	MSJ1.22	AT5g64380/MSJ1_22	Color2 [DarkGray]	1	4		fructose 1,6-bisphosphate metabolic process [GO:0030388];fructose 6-phosphate metabolic process [GO:0006002];fructose metabolic process [GO:0006000];gluconeogenesis [GO:0006094];sucrose biosynthetic process [GO:0005986]	chloroplast [GO:0009507];chloroplast stroma [GO:0009570];cytoplasm [GO:0005737]	fructose 1,6-bisphosphate 1-phosphatase activity [GO:0042132]	+	23	23	23	49.8	49.8	49.8	43.975	0	159.02	16331000000	241	0	159840000	49774000	174320000	0	4966700	19779000	3122000	1086200000	1065200000	1329700000	1211700000	682440000	607520000	1007600000	860310000	976220000	719100000	894940000	1002400000	1179000000	1188900000
+	1.1413	1.58033	2.99038	Q9SGH6	Q9SGH6	5312	DOX1	Alpha-dioxygenase 1	Color2 [DarkGray]	1	4		(R)-2-hydroxy-alpha-linolenic acid biosynthetic process [GO:1902609];cell death [GO:0008219];cellular response to nitric oxide [GO:0071732];cellular response to reactive oxygen species [GO:0034614];cellular response to salicylic acid stimulus [GO:0071446];defense response to bacterium [GO:0042742];defense response to fungus [GO:0050832];fatty acid alpha-oxidation [GO:0001561];lipid metabolic proc…	monolayer-surrounded lipid storage body [GO:0012511]	heme binding [GO:0020037];metal ion binding [GO:0046872];oxidoreductase activity, acting on single donors with incorporation of molecular oxygen, incorporation of two atoms of oxygen [GO:0016702];peroxidase activity [GO:0004601]	+	85	85	85	82.9	82.9	82.9	73.157	0	323.31	277770000000	1069	42901000000	45591000000	38850000000	36949000000	27998000000	27193000000	26576000000	27848000000	966000000	606370000	914850000	112540000	113350000	177600000	23376000	78618000	139330000	26815000	0	233770000	0	64641000
+	1.57802	1.57872	2.98705	O82656	O82656	1596	PTP1	Protein-tyrosine-phosphatase PTP1	Color2 [DarkGray]	1	4		defense response [GO:0006952];intracellular signal transduction [GO:0035556];negative regulation of defense response [GO:0031348];protein dephosphorylation [GO:0006470]	cytoplasm [GO:0005737];nucleus [GO:0005634];plasma membrane [GO:0005886]	kinase binding [GO:0019900];MAP kinase tyrosine phosphatase activity [GO:0033550];protein tyrosine phosphatase activity [GO:0004725]	+	27	27	27	72.1	72.1	72.1	37.798	0	280.14	24100000000	367	1269100000	1386500000	1199700000	1184600000	1293000000	1689600000	1586800000	1774500000	918540000	879640000	912090000	1054700000	603570000	562010000	599710000	888720000	657010000	551160000	614180000	830040000	857120000	990090000
+	2.19554	1.57849	2.98657	Q9ZR03	Q9ZR03	5907	petC	Cytochrome b6-f complex iron-sulfur subunit, chloroplastic	Color2 [DarkGray]	1	4		defense response to bacterium [GO:0042742];nonphotochemical quenching [GO:0010196];photosynthetic electron transport chain [GO:0009767];response to karrikin [GO:0080167]	chloroplast [GO:0009507];chloroplast envelope [GO:0009941];chloroplast thylakoid [GO:0009534];chloroplast thylakoid membrane [GO:0009535];cytochrome b6f complex [GO:0009512];cytosol [GO:0005829];integral component of membrane [GO:0016021];membrane [GO:0016020];plasma membrane [GO:0005886];thylakoid [GO:0009579]	2 iron, 2 sulfur cluster binding [GO:0051537];electron transporter, transferring electrons from cytochrome b6/f complex of photosystem II activity [GO:0046028];electron transporter, transferring electrons within cytochrome b6/f complex of photosystem II activity [GO:0045158];metal ion binding [GO:0046872];oxidoreductase activity [GO:0016491]	+	6	6	6	39.7	39.7	39.7	24.366	0	72.464	3544200000	48	8545600	12786000	0	0	0	22149000	13581000	9838100	353850000	330020000	391730000	338910000	147890000	189860000	166210000	166580000	227970000	123980000	237820000	193280000	182250000	151220000
+	1.59289	1.57654	2.98255	F4I2A0	F4I2A0	593	At1g76140	Prolyl oligopeptidase family protein	Color2 [DarkGray]	1	4			chloroplast [GO:0009507];cytoplasm [GO:0005737];cytosol [GO:0005829];mitochondrion [GO:0005739]	endopeptidase activity [GO:0004175];oligopeptidase activity [GO:0070012];serine-type endopeptidase activity [GO:0004252];serine-type exopeptidase activity [GO:0070008]	+	53	53	45	62.5	62.5	53.6	89.404	0	323.31	70260000000	848	2713700000	3728700000	2784400000	2631700000	3469100000	6961400000	3259600000	3530900000	2615800000	2502200000	2746600000	2685500000	1565100000	1731400000	2900700000	3069900000	1900300000	1400000000	2238300000	2351700000	4491100000	3009600000
+	1.56757	1.57622	2.98187	Q9M8S7	Q9M8S7	5074	At3g02860	F13E7.20 protein	Color2 [DarkGray]	1	4		mitotic cell cycle [GO:0000278];mitotic DNA damage checkpoint [GO:0044773];mitotic DNA replication checkpoint [GO:0033314];negative regulation of reactive oxygen species biosynthetic process [GO:1903427];negative regulation of transcription, DNA-templated [GO:0045892];nuclear DNA replication [GO:0033260];positive regulation of seed germination [GO:0010030];replication fork protection [GO:0048478]…	cytosol [GO:0005829];nucleus [GO:0005634];spliceosomal complex [GO:0005681]	nucleic acid binding [GO:0003676];zinc ion binding [GO:0008270]	+	1	1	1	3.2	3.2	3.2	35.21	0.00094643	2.5803	89551000	4	1975600	3080200	3414300	3231300	4917000	3238800	3544100	2874000	3971800	5613100	6783800	6894200	1769500	3104500	3171100	3237000	3905300	2521300	4005800	4336900	2487600	4082800
+	1.70314	1.57572	2.98085	P43297	P43297	1800	RD21A	Cysteine proteinase RD21A	Color2 [DarkGray]	1	4		defense response to fungus [GO:0050832];proteolysis [GO:0006508];proteolysis involved in cellular protein catabolic process [GO:0051603]	apoplast [GO:0048046];cytoplasmic stress granule [GO:0010494];extracellular space [GO:0005615];Golgi apparatus [GO:0005794];lysosome [GO:0005764];nucleus [GO:0005634];P-body [GO:0000932];plasmodesma [GO:0009506];secretory vesicle [GO:0099503];vacuole [GO:0005773]	cysteine-type endopeptidase activity [GO:0004197];cysteine-type peptidase activity [GO:0008234];peptidase activity [GO:0008233]	+	33	33	29	49.4	49.4	45.2	50.966	0	323.31	364680000000	889	34160000000	33074000000	32204000000	33061000000	22059000000	19859000000	21380000000	23105000000	11595000000	11488000000	11027000000	9590100000	6366800000	7722800000	7555600000	7455300000	9642000000	5527100000	9257900000	9046600000	10617000000	8971100000
+	2.48239	1.57036	2.96978	Q8LBS4	Q8LBS4	2873	GRXS12	Monothiol glutaredoxin-S12, chloroplastic	Color2 [DarkGray]	1	4		cell redox homeostasis [GO:0045454];cellular response to oxidative stress [GO:0034599]	chloroplast [GO:0009507];cytoplasm [GO:0005737]	2 iron, 2 sulfur cluster binding [GO:0051537];electron transfer activity [GO:0009055];glutathione-disulfide reductase activity [GO:0004362];metal ion binding [GO:0046872];protein disulfide oxidoreductase activity [GO:0015035]	+	8	8	8	45.8	45.8	45.8	19.125	0	79.144	10135000000	81	21140000	110680000	37962000	100340000	75641000	78071000	114130000	83616000	776800000	737620000	803880000	838950000	314030000	421880000	512910000	481250000	705160000	313930000	588910000	537070000	655730000	723480000
+	7.14927	1.56733	2.96356	Q9LMJ7	Q9LMJ7	4570	At1g07040	At1g07040	Color2 [DarkGray]	1	4			chloroplast [GO:0009507]		+	36	36	36	70.9	70.9	70.9	40.637	0	323.31	48647000000	465	561670000	700610000	529900000	447860000	577300000	533570000	493440000	567320000	7418200000	7058900000	7264300000	6384600000	786260000	999650000	996780000	1067600000	2046500000	1444700000	1969400000	1930400000	1211500000	1167500000
+	1.49298	1.56547	2.95973	Q9ASZ4	Q9ASZ4	3634	At3g17900	AT3g17900/MEB5_12	Color2 [DarkGray]	1	4					+	32	32	32	39.4	39.4	39.4	91.58	0	116.15	6073400000	121	520030000	719490000	705480000	548280000	656250000	852980000	713100000	863790000	22849000	60264000	61134000	41181000	10339000	29617000	36319000	22223000	11777000	11811000	21648000	16426000	44320000	29329000
+	1.74725	1.5651	2.95897	O81864	O81864	1546	FKBP17-1	Peptidyl-prolyl cis-trans isomerase FKBP17-1, chloroplastic	Color2 [DarkGray]	1	4			chloroplast thylakoid lumen [GO:0009543]	peptidyl-prolyl cis-trans isomerase activity [GO:0003755]	+	4	4	4	21	21	21	24.713	0	22.769	2265700000	38	0	0	0	0	5352700	0	0	0	154160000	152040000	193130000	215280000	91418000	113240000	108240000	122300000	98533000	91703000	134270000	118710000	139740000	183080000
+	2.80738	1.56478	2.95832	Q9SIP1	Q9SIP1	5370	UP3	Stress-response A/B barrel domain-containing protein UP3	Color2 [DarkGray]	1	4			chloroplast [GO:0009507];chloroplast stroma [GO:0009570];mitochondrion [GO:0005739];peroxisome [GO:0005777]		+	20	20	20	61.6	61.6	61.6	28.865	0	323.31	43118000000	408	1792300000	2390600000	1676000000	1571000000	1933100000	2356400000	2641000000	2329800000	2010600000	1581500000	2329900000	1973100000	1261200000	1450700000	1604800000	1414600000	1599300000	884210000	1424700000	1202700000	1954900000	1859500000
+	1.16161	1.56319	2.95507	Q8L866	Q8L866	2829	MHK10.21	Amine oxidase	Color2 [DarkGray]	1	4		amine metabolic process [GO:0009308];lateral root formation [GO:0010311]	cytosol [GO:0005829];peroxisome [GO:0005777]	copper ion binding [GO:0005507];primary amine oxidase activity [GO:0008131];quinone binding [GO:0048038]	+	47	47	47	62.9	62.9	62.9	86.69	0	323.31	19249000000	371	1653000000	1894900000	1328800000	1162100000	1467900000	1633400000	1663400000	1416800000	597420000	461140000	655640000	389340000	273460000	357590000	386200000	385090000	492940000	231440000	435250000	599680000	481330000	388280000
+	3.98916	1.55955	2.94762	A0A1P8B667	A0A1P8B667	236	APP1	Aminopeptidase P1	Color2 [DarkGray]	1	4			cytoplasm [GO:0005737]	metal ion binding [GO:0046872];metalloaminopeptidase activity [GO:0070006]	+	49	49	49	73	73	73	72.874	0	323.31	81299000000	746	4700900000	4754500000	3917700000	3964800000	3447500000	3622800000	3807500000	3556600000	3953500000	3606700000	4581800000	3669800000	2381100000	2233900000	2050400000	2331500000	3463300000	2331800000	3349600000	3202800000	3239500000	3013900000
+	1.4823	1.55784	2.94413	Q08770	Q08770	2041	RPL10B	60S ribosomal protein L10-2	Color2 [DarkGray]	1	4		developmental process [GO:0032502];response to UV-B [GO:0010224];ribosomal large subunit assembly [GO:0000027];translation [GO:0006412]	chloroplast envelope [GO:0009941];cytoplasm [GO:0005737];cytosolic large ribosomal subunit [GO:0022625];nucleus [GO:0005634];ribosome [GO:0005840]	structural constituent of ribosome [GO:0003735]	+	41	1	1	80.1	3.2	3.2	24.909	1	-2	117270000	2	0	0	0	0	28321000	38866000	0	0	0	8325500	10245000	9988200	0	0	9366200	0	0	0	0	0	0	0
+	1.21717	1.55385	2.936	F4K0M7	F4K0M7	974	At5g66550	Maf-like protein	Color2 [DarkGray]	1	4			chloroplast [GO:0009507]	nucleoside-triphosphate diphosphatase activity [GO:0047429]	+	10	10	10	40.1	40.1	40.1	22.565	0	49.93	4209400000	78	14664000	11127000	0	7883800	0	21305000	3018700	6163600	337650000	327670000	453250000	386310000	348000000	192620000	205540000	224960000	233330000	156650000	212450000	181840000	213540000	301620000
+	2.14596	1.55264	2.93354	Q9SN79;Q9ZUN7	Q9SN79	5502	F1P2.140	Alpha/beta-Hydrolases superfamily protein	Color2 [DarkGray]	1	4			cytosol [GO:0005829]	hydrolase activity [GO:0016787]	+	22	22	17	64.7	64.7	58.6	35.048	0	109.05	13996000000	199	429070000	526330000	420800000	371290000	482440000	549500000	529270000	551120000	804660000	734440000	802800000	859980000	350910000	477160000	532490000	535090000	540380000	277720000	423940000	535240000	935620000	1013000000
[truncated: 1,724 more rows]
[truncated: 121 more columns]
