# Supplementary material for: Proteome Dynamics of Persulfidation in Leaf Tissue under Light/Dark Conditions and Carbon Deprivation
Source: Antioxidants (Basel). 2023 Mar 23;12(4):789. doi: 10.3390/antiox12040789 (PMC10135009; doi:10.3390/antiox12040789)
Supplement: Supplementary file 1 [file antioxidants-12-00789-s001.zip › Dataset S11.xlsx]

## Sheet: Hoja1
Dataset 11. Identify proteins in Cluster 2 with reduced level of persulfidation under mild (S3) carbon stravation
AGI_ID	Gene name	Protein name
At5g57440	GPP2	(DL)-glycerol-3-phosphatase 2
At3g14420	GLO1	(S)-2-hydroxy-acid oxidase GLO1
At3g14415	GLO2	(S)-2-hydroxy-acid oxidase GLO2
At4g17050	UGLYAH	(S)-ureidoglycine aminohydrolase
At1g05010	ACO4	1-aminocyclopropane-1-carboxylate oxidase 4
At4g14710	ARD3	1,2-dihydroxy-3-keto-5-methylthiopentene dioxygenase 3
At2g36390	SBE2.1	1,4-alpha-glucan-branching enzyme 2-1, chloroplastic/amyloplastic
At1g35160	GRF4	14-3-3-like protein GF14 phi
At2g34680	AIR9	187-kDa microtubule-associated protein AIR9
At1g63970	ISPF	2-C-methyl-D-erythritol 2,4-cyclodiphosphate synthase, chloroplastic
At1g79500	KDSA1	2-dehydro-3-deoxyphosphooctonate aldolase 1
At4g16765	At4g16765	2-oxoglutarate (2OG) and Fe(II)-dependent oxygenase superfamily protein
At3g20810	JMJD5	2-oxoglutarate (2OG) and Fe(II)-dependent oxygenase superfamily protein
At5g48020	MDN11.10	2-oxoglutarate (2OG) and Fe(II)-dependent oxygenase superfamily protein
At1g15540	At1g15540	2-oxoglutarate-dependent dioxygenase-like protein
At5g51440	HSP23.5	23.5 kDa heat shock protein, mitochondrial
At5g19990	RPT6A	26S proteasome regulatory subunit 8 homolog A
At3g28760	At3g28760	3-dehydroquinate synthase
At1g06550	At1g06550	3-hydroxyisobutyryl-CoA hydrolase-like protein 5
At1g74960	KAS2	3-oxoacyl-[acyl-carrier-protein] synthase II, chloroplastic
At5g64860	DPE1	4-alpha-glucanotransferase DPE1, chloroplastic/amyloplastic
At1g20510	4CLL5	4-coumarate--CoA ligase-like 5
At5g61170	RPS19C	40S ribosomal protein S19-3
At5g20980	MS3	5-methyltetrahydropteroyltriglutamate--homocysteine methyltransferase 3, chloroplastic
At1g64190	PGD1	6-phosphogluconate dehydrogenase, decarboxylating 1, chloroplastic
At3g02360	PGD2	6-phosphogluconate dehydrogenase, decarboxylating 2
At5g41670	PGD3	6-phosphogluconate dehydrogenase, decarboxylating 3, chloroplastic
At5g24400	PGL3	6-phosphogluconolactonase 3, chloroplastic
At2g27710	RPP2B	60S acidic ribosomal protein P2-2
At1g26910	RPL10B	60S ribosomal protein L10-2
At5g23900	RPL13D	60S ribosomal protein L13-3
At4g19210	ABCE2	ABC transporter E family member 2
At1g59870	ABCG36	ABC transporter G family member 36
At5g46790	PYL1	Abscisic acid receptor PYL1
At4g17870	PYR1	Abscisic acid receptor PYR1
At5g36880	ACS	Acetyl-coenzyme A synthetase, chloroplastic/glyoxysomal
At4g29270	At4g29270	Acid phosphatase-like protein
At5g04740	ACR12	ACT domain-containing protein ACR12
At2g37620	ACT1	Actin-1
At3g12110	ACT11	Actin-11
At3g18780	ACT2	Actin-2
At5g09810	ACT7	Actin-7
At3g46000	ADF2	Actin-depolymerizing factor 2
At1g80460	NHO1	Actin-like ATPase superfamily protein
At1g18450	ARP4	Actin-related protein 4
At4g00520	At4g00520	Acyl-CoA thioesterase family protein
At4g13940	SAHH1	Adenosylhomocysteinase 1
At3g23810	SAHH2	Adenosylhomocysteinase 2
At5g47840	At5g47840	Adenylate kinase 2, chloroplastic
At1g74910	F9E10.24	ADP-glucose pyrophosphorylase family protein
At5g54310	AGD5	ADP-ribosylation factor GTPase-activating protein AGD5
At1g72330	ALAAT2	Alanine aminotransferase 2, mitochondrial
At1g64710	At1g64710	Alcohol dehydrogenase-like 4
At5g42250	At5g42250	Alcohol dehydrogenase-like 7
At3g14150	HAOX2	Aldolase-type TIM barrel family protein
At4g29700	At4g29700	Alkaline-phosphatase-like family protein
At1g13280	AOC4	Allene oxide cyclase 4, chloroplastic
At1g30000	MNS3	alpha-1,2-Mannosidase
At3g26380	At3g26380	Alpha-galactosidase
At3g29320	PHS1	Alpha-glucan phosphorylase 1
At1g15060	At1g15060	Alpha/beta hydrolase family protein
At2g39420	At2g39420	Alpha/beta-Hydrolases superfamily protein
At3g23570	MDB19.5	Alpha/beta-Hydrolases superfamily protein
At3g47590	F1P2.140	Alpha/beta-Hydrolases superfamily protein
At5g11910	At5g11910	Alpha/beta-Hydrolases superfamily protein
At3g43670	F23N14_50	Amine oxidase
At1g11860	At1g11860	Aminomethyltransferase
At2g25280	At2g25280	AmmeMemoRadiSam system protein B
At2g17390	AKR2B	Ankyrin repeat domain-containing protein 2B
At2g26210	At2g26210	Ankyrin repeat family protein
At2g38760	ANN3	Annexin D3
At5g17990	PAT1	Anthranilate phosphoribosyltransferase, chloroplastic
At2g29690	ASA2	Anthranilate synthase alpha subunit 2, chloroplastic
At1g48760	DELTA-ADR	AP-3 complex subunit delta
At2g34040	At2g34040	Apoptosis inhibitory protein 5 (API5)
At2g40600	At2g40600	Appr-1-p processing enzyme family protein
At1g13980	GN	ARF guanine-nucleotide exchange factor GNOM
At1g66530	At1g66530	Arginine--tRNA ligase, cytoplasmic
At4g26300	emb1027	Arginyl-tRNA synthetase
At3g08943	At3g08943	ARM repeat superfamily protein
At1g80360	ISS1	Aromatic aminotransferase ISS1
At1g02360	At1g02360	At1g02360
At1g03030	At1g03030	At1g03030
At1g10140	At1g10140	At1g10140
At1g23130	At1g23130	At1g23130/T26J12_10
At1g27030	At1g27030	At1g27030/T7N9_9
At1g32160	At1g32160	At1g32160/F3C3_6
At1g71950	At1g71950	At1g71950
At1g72880	At1g72880	At1g72880
At1g74840	At1g74840	AT1G74840 protein
At1g76160	sks5	AT1G76160 protein
At1g77670	At1g77670	At1g77670
At1g80480	PTAC17	At1g80480
At2g17320	At2g17320	AT2G17320 protein
At2g27460	At2g27460	At2g27460
At2g32600	At2g32600	At2g32600/T26B15.16
At2g45990	At2g45990	AT2G45990 protein
At3g04010	At3g04010	At3g04010
At3g05625	At3g05625	At3g05625
At3g06670	At3g06670	At3g06670/T8E24.10
At3g12480	NF-YC11	At3g12480/MQC3.32
At3g17020	At3g17020	AT3g17020/K14A17_14
At3g18860	At3g18860	AT3g18860/MCB22_3
At3g53990	F5K20_290	AT3G53990 protein
At3g57890	At3g57890	AT3g57890/T10K17_100
At3g62110	At3g62110	AT3g62110
At4g02340	At4g02340	AT4g02340 protein
At4g18950	At4g18950	AT4g18950/F13C5_120
At4g28706	At4g28706	At4g29227
At4g33720	T16L1.210	AT4g33720
At4g39820	At4g39820	At4g39820
At5g16260	EARLY FLOWERING 9	At5g16260
At5g18630	At5g18630	AT5g18630/T1A4_10
At5g19860	At5g19860	At5g19860
At5g22120	At5g22120	At5g22100
At5g40190	MSN9.9	At5g40190
At5g57700	MRI1.6	At5g57700
At5g61510	At5g61510	At5g61510
At5g64430	At5g64430	At5g64430
At3g22890	APS1	ATP sulfurylase 1, chloroplastic
At1g19920	APS2	ATP sulfurylase 2
	atp1	ATP synthase subunit alpha
AtCg00120	atpA	ATP synthase subunit alpha, chloroplastic
At1g09430	ACLA-3	ATP-citrate synthase alpha chain protein 3
At1g11750	CLPP6	ATP-dependent Clp protease proteolytic subunit 6, chloroplastic
At5g61500	ATG3	Autophagy-related protein 3
At1g49480	REM19	B3 domain-containing protein REM19
At3g29680	At3g29680	BAHD acyltransferase At3g29680
At2g02850	ARPN	Basic blue protein
At1g55120	CWINV3	Beta-fructofuranosidase, insoluble isoenzyme CWINV3
At3g52840	BGAL2	Beta-galactosidase
At1g45130	BGAL5	Beta-galactosidase 5
At2g44490	BGLU26	Beta-glucosidase 26, peroxisomal
At5g24550	BGLU32	Beta-glucosidase 32
At5g36890	BGLU42	Beta-glucosidase 42
At2g22250	PAT	Bifunctional aspartate aminotransferase and glutamate/aspartate-prephenate aminotransferase
At1g31230	AKHSDH1	Bifunctional aspartokinase/homoserine dehydrogenase 1, chloroplastic
At5g55450	MTE17.16	Bifunctional inhibitor/lipid-transfer protein/seed storage 2S albumin superfamily protein
At2g38660	FOLD1	Bifunctional protein FolD 1, mitochondrial
At5g32470	TH2	Bifunctional TH2 protein, mitochondrial
At1g79150	YUP8H12R.24	Binding protein
At5g27410	At5g27410	Branched-chain-amino-acid aminotransferase-like protein 2
At5g37770	CML24	Calcium-binding protein CML24
At1g67310	CAMTA4	Calmodulin-binding transcription activator 4
At3g53010	At3g53010	Carbohydrate esterase, putative (DUF303)
At1g72710	CKL2	Casein kinase 1-like protein 2
At4g28880	CKL3	Casein kinase 1-like protein 3
At2g35440	At2g35440	Catalytic/ hydrolase
At5g55280	FTSZ1	Cell division protein FtsZ homolog 1, chloroplastic
At2g36250	FTSZ2-1	Cell division protein FtsZ homolog 2-1, chloroplastic
At3g52750	FTSZ2-2	Cell division protein FtsZ homolog 2-2, chloroplastic
At5g50920	CLPC1	Chaperone protein ClpC1, chloroplastic
At5g51070	CLPD	Chaperone protein ClpD, chloroplastic
At1g09340	CRB	Chloroplast RNA binding protein
At3g63140	CSP41A	Chloroplast stem-loop binding protein of 41 kDa a, chloroplastic
At5g58490	MQJ2.6	Cinnamoyl-CoA reductase-like protein
At3g08530	CHC2	Clathrin heavy chain 2
At2g20760	At2g20760	Clathrin light chain 1
At1g62020	At1g62020	Coatomer subunit alpha-1
At3g30841	MJI6.21	Cofactor-independent phosphoglycerate mutase
At2g17870	CSP3	Cold shock domain-containing protein 3
At5g43310	MNL12.14	COP1-interacting protein-like protein
At1g02090	CSN7	COP9 signalosome complex subunit 7
At2g39940	COI1	Coronatine-insensitive protein 1
At1g04400	CRY2	Cryptochrome-2
At2g02560	CAND1	Cullin-associated NEDD8-dissociated protein 1
At5g18470	At5g18470	Curculin-like (Mannose-binding) lectin family protein
At4g34490	CAP1	Cyclase-associated protein 1
At4g34090	At4g34090	Cyclin delta-3
At1g66750	CDKD-2	Cyclin-dependent kinase D-2
At5g35100	At5g35100	Cyclophilin-like peptidyl-prolyl cis-trans isomerase family protein
At3g59950	ATG4b	Cysteine protease
At5g47550	CYS5	Cysteine proteinase inhibitor 5
At2g31170	SYCO	Cysteine--tRNA ligase, chloroplastic/mitochondrial
At4g23180	CRK10	Cysteine-rich receptor-like protein kinase 10
At4g23220	CRK14	Cysteine-rich receptor-like protein kinase 14
At4g29610	CDA6	Cytidine deaminase 6
At3g07570	At3g07570	Cytochrome b561 and DOMON domain-containing protein At3g07570
At3g45070	SOT5	Cytosolic sulfotransferase 5
At5g57850	DAAT	D-amino-acid transaminase, chloroplastic
At2g03800	GEK1	D-aminoacyl-tRNA deacylase
At1g80380	GLYK	D-glycerate 3-kinase, chloroplastic
At5g06580	DLD	D-lactate dehydrogenase [cytochrome], mitochondrial
At3g18600	RH51	DEAD-box ATP-dependent RNA helicase 51
At5g55660	MDF20.10	DEK domain-containing chromatin associated protein
At3g55610	P5CSB	Delta-1-pyrroline-5-carboxylate synthase B
At5g60590	MUP24.1	DHBP synthase RibB-like alpha/beta domain-containing protein
At1g25570	At1g25570	Di-glucose binding protein with Leucine-rich repeat domain-containing protein
At1g48030	LPD1	Dihydrolipoyl dehydrogenase 1, mitochondrial
At3g17240	LPD2	Dihydrolipoyl dehydrogenase 2, mitochondrial
At5g24260	MOP9.8	Dipeptidyl peptidase IV-like protein
At2g38700	MVD1	Diphosphomevalonate decarboxylase MVD1, peroxisomal
At4g11180	DIR12	Dirigent protein 12
At4g23690	DIR6	Dirigent protein 6
At5g45210	At5g45210	Disease resistance protein (TIR-NBS-LRR class) family
At3g12610	DRT100	DNA damage-repair/toleration protein DRT100
At4g08310	At4g08310	DNA ligase
At1g08130	LIG1	DNA ligase 1
At5g47870	RAD52-2	DNA repair RAD52-like protein 2, chloroplastic
At5g44635	MCM6	DNA replication licensing factor MCM6
At2g41460	ARP	DNA-(apurinic or apyrimidinic site) lyase
At1g71710	At1g71710	DNAse I-like superfamily protein
At5g05560	EMB2771	E3 ubiquitin ligase
At1g79380	RGLG4	E3 ubiquitin-protein ligase RGLG4
At4g31840	ENODL15	Early nodulin-like protein 15
At2g18660	EGC2	EG45-like domain containing protein 2
At5g43430	ETFBETA	Electron transfer flavoprotein subunit beta
At4g02930	TUFA	Elongation factor Tu, mitochondrial
At5g49720	KOR	Endoglucanase 25
At4g24190	HSP90-7	Endoplasmin homolog
At2g25870	YBEY	Endoribonuclease YBEY, chloroplastic
At3g13300	VCS	Enhancer of mRNA-decapping protein 4
At1g78820	At1g78820	EP1-like glycoprotein 1
At2g39990	TIF3F1	Eukaryotic translation initiation factor 3 subunit F
At5g57870	EIF(ISO)4G1	Eukaryotic translation initiation factor isoform 4G-1
At5g50380	EXO70F1	Exocyst subunit Exo70 family protein
At1g54090	ATEXO70D2	Exocyst subunit Exo70 family protein
At2g40610	EXPA8	Expansin-A8
At2g46520	CAS	Exportin-2
At2g46900	At2g46900	Expressed protein
At3g15610	At3g15610	Expressed protein
At2g01190	PDE331	Expressed protein
At1g34420	F7P12.13	F12K21.25
At1g16270	At1g16270	F3O9.7 protein
At3g28730	SSRP1	FACT complex subunit SSRP1
At5g48440	MJE7.7	FAD-dependent oxidoreductase family protein
At4g12730	FLA2	Fasciclin-like arabinogalactan protein 2
At3g63170	FAP1	Fatty-acid-binding protein 1
At1g53520	FAP3	Fatty-acid-binding protein 3, chloroplastic
At1g20020	FNR2	Ferredoxin--NADP reductase, chloroplastic
At2g15620	NIR1	Ferredoxin--nitrite reductase, chloroplastic
At2g41220	GLU2	Ferredoxin-dependent glutamate synthase 2, chloroplastic
At1g62600	At1g62600	Flavin-containing monooxygenase FMO GS-OX-like 4
At1g07250	UGT71C4	Flavonol 3-O-glucosyltransferase UGT71C4
At1g06000	UGT89C1	Flavonol 7-O-rhamnosyltransferase
At5g50950	FUM2	FUMARASE 2
At3g06580	GAL1	Galactokinase
At3g22200	POP2	Gamma-aminobutyrate transaminase POP2, mitochondrial
At3g62020	GLP10	Germin-like protein
At5g19220	ADG2	Glucose-1-phosphate adenylyltransferase large subunit 1, chloroplastic
At5g48300	APS1	Glucose-1-phosphate adenylyltransferase small subunit, chloroplastic
At5g35790	G6PD1	Glucose-6-phosphate 1-dehydrogenase 1, chloroplastic
At5g40760	G6PD6	Glucose-6-phosphate 1-dehydrogenase 6, cytoplasmic
At4g24620	PGI1	Glucose-6-phosphate isomerase 1, chloroplastic
At5g42740	PGIC	Glucose-6-phosphate isomerase, cytosolic
At3g01640	GLCAK1	Glucuronokinase 1
At4g23100	GSH1	Glutamate--cysteine ligase, chloroplastic
At5g64050	OVA3	Glutamate--tRNA ligase, chloroplastic/mitochondrial
At5g37600	GLN1-1	Glutamine synthetase cytosolic isozyme 1-1
At3g17820	GLN1-3	Glutamine synthetase cytosolic isozyme 1-3
At1g25350	OVA9	Glutamine--tRNA ligase, cytoplasmic
At5g44070	PCS1	Glutathione gamma-glutamylcysteinyltransferase 1
At4g39640	GGT1	Glutathione hydrolase 1
At1g19570	DHAR1	Glutathione S-transferase DHAR1, mitochondrial
At5g16710	DHAR3	Glutathione S-transferase DHAR3, chloroplastic
At4g02520	GSTF2	Glutathione S-transferase F2
At4g19880	At4g19880	Glutathione S-transferase family protein
At5g27380	GSH2	Glutathione synthetase, chloroplastic
At1g12900	GAPA-2	Glyceraldehyde-3-phosphate dehydrogenase
At3g26650	GAPA1	Glyceraldehyde-3-phosphate dehydrogenase GAPA1, chloroplastic
At1g42970	GAPB	Glyceraldehyde-3-phosphate dehydrogenase GAPB, chloroplastic
At5g40610	DHAPRD	Glycerol-3-phosphate dehydrogenase [NAD(+)] 1, chloroplastic
At5g04280	RZ1C	Glycine-rich RNA-binding protein RZ1C
At5g15870	At5g15870	Glycosyl hydrolase family 81 protein
At5g20010	RAN1	GTP-binding nuclear protein Ran-1
At1g27430	At1g27430	GYF domain-containing protein
At5g28540	BIP1	Heat shock 70 kDa protein BIP1
At1g09080	BIP3	Heat shock 70 kDa protein BIP3
At5g42020	BIP2	Heat shock protein 70 (Hsp 70) family protein
At5g56030	HSP90-2	Heat shock protein 90-2
At3g02760	At3g02760	Histidine--tRNA ligase, cytoplasmic
At1g65450	GLAUCE	HXXXD-type acyl-transferase family protein
At5g07860	MXM12.10	HXXXD-type acyl-transferase family protein
At3g59020	At3g59020	Importin beta-like SAD2 homolog
At5g18670	BAM9	Inactive beta-amylase 9
At4g37390	GH3.2	Indole-3-acetic acid-amido synthetase GH3.2
At4g13720	At4g13720	Inosine triphosphate pyrophosphatase
At2g41790	PXM16	Insulin-degrading enzyme-like 1, peroxisomal
At5g03290	IDH5	Isocitrate dehydrogenase [NAD] catalytic subunit 5, mitochondrial
At4g35260	IDH1	Isocitrate dehydrogenase [NAD] regulatory subunit 1, mitochondrial
At2g17130	IDH2	Isocitrate dehydrogenase [NAD] regulatory subunit 2, mitochondrial
At5g14590	At5g14590	Isocitrate dehydrogenase [NADP], chloroplastic/mitochondrial
At5g49030	OVA2	Isoleucine--tRNA ligase, chloroplastic/mitochondrial
At5g65460	KAC2	Kinesin like protein for actin based chloroplast movement 2
At5g06670	At5g06670	Kinesin-like protein
At3g54870	KINUC	Kinesin-like protein KIN-UC
At3g04320	KTI6	Kunitz trypsin inhibitor 6
At3g56840	L2HGDH	L-2-hydroxyglutarate dehydrogenase, mitochondrial
At4g28680	TYRDC	L-tyrosine decarboxylase
At1g08110	At1g08110	Lactoylglutathione lyase
At3g16530	At3g16530	Lectin-like protein At3g16530
At5g13520	LKHA4	Leucine aminopeptidase
At1g33610	At1g33610	Leucine-rich repeat (LRR) family protein
At3g12145	FLR1	Leucine-rich repeat protein FLOR 1
At1g10850	At1g10850	Leucine-rich repeat protein kinase family protein
At1g21880	LYM1	LysM domain-containing GPI-anchored protein 1
At1g28380	NSL1	MACPF domain-containing protein NSL1
At5g42770	MJB21.15	Maf-like protein
At3g16170	AAE13	Malonate--CoA ligase
At3g21160	MNS2	Mannosyl-oligosaccharide 1,2-alpha-mannosidase MNS2
At3g13530	M3KE1	MAP3K epsilon protein kinase 1
At2g16005	ROSY1	MD-2-related lipid-recognition protein ROSY1
At2g42890	ML2	MEI2-like 2
At5g04120	IPSP	Metal-independent phosphoserine phosphatase
At3g13800	At3g13800	Metallo-hydrolase/oxidoreductase superfamily protein
At3g59990	MAP2B	Methionine aminopeptidase 2B
At5g49810	MMT1	Methionine S-methyltransferase
At3g55400	OVA1	Methionine--tRNA ligase, chloroplastic/mitochondrial
At2g44160	MTHFR2	Methylenetetrahydrofolate reductase 2
At2g36070	TIM44-2	Mitochondrial import inner membrane translocase subunit TIM44-2
At3g45640	MPK3	Mitogen-activated protein kinase 3
At1g70830	MLP28	MLP-like protein 28
At1g70850	MLP34	MLP-like protein 34
At4g25240	SKS1	Monocopper oxidase-like protein SKS1
At4g12420	SKU5	Monocopper oxidase-like protein SKU5
At1g63940	MDAR5	Monodehydroascorbate reductase, chloroplastic/mitochondrial
At1g08370	At1g08370	mRNA-decapping enzyme-like protein
At5g25980	TGG2	Myrosinase 2
At1g07780	PAI1	N-(5'-phosphoribosyl)anthranilate isomerase 1, chloroplastic
At1g21640	NADK2	NAD kinase 2, chloroplastic
At4g18810	At4g18810	NAD(P)-binding Rossmann-fold superfamily protein
At4g20750	At4g20750	NAD(P)-binding Rossmann-fold superfamily protein
At4g24520	ATR1	NADPH--cytochrome P450 reductase 1
At5g19180	ECR1	NEDD8-activating enzyme E1 catalytic subunit
At2g22570	NIC1	Nicotinamidase 1
At4g01900	GLB1	Nitrogen regulatory protein P-II homolog
At3g53180	NodGS	Nodulin/glutamine synthase-like protein
At1g28290	AGP31	Non-classical arabinogalactan protein 31
At4g25450	ABCB28	Non-intrinsic ABC protein 8
At4g14540	NFYB3	Nuclear transcription factor Y subunit B-3
At2g40660	At2g40660	Nucleic acid-binding, OB-fold-like protein
At1g68760	NUDT1	Nudix hydrolase 1
At4g11980	NUDT14	Nudix hydrolase 14, chloroplastic
At5g47650	NUDT2	Nudix hydrolase 2
At1g79690	NUDT3	Nudix hydrolase 3
At1g56050	At1g56050	Obg-like ATPase 1
At5g65620	OOP	Organellar oligopeptidase A, chloroplastic/mitochondrial
At1g50670	OTU2	OVARIAN TUMOR DOMAIN-containing deubiquitinating enzyme 2
At5g59420	ORP3C	Oxysterol-binding protein-related protein 3C
At4g32180	PANK2	Pantothenate kinase 2
At3g09410	PAE5	Pectin acetylesterase 5
At4g19410	PAE7	Pectin acetylesterase 7
At5g49215	At5g49215	Pectin lyase-like superfamily protein
At3g06770	At3g06770	Pectin lyase-like superfamily protein
At3g02650	At3g02650	Pentatricopeptide repeat-containing protein At3g02650, mitochondrial
At1g23430	At1g23430	Peptidase C15, pyroglutamyl peptidase I-like protein
At5g07470	MSRA3	Peptide methionine sulfoxide reductase A3
At4g21860	MSRB2	Peptide methionine sulfoxide reductase B2, chloroplastic
At4g38740	CYP18-3	Peptidyl-prolyl cis-trans isomerase CYP18-3
At4g34870	CYP18-4	Peptidyl-prolyl cis-trans isomerase CYP18-4
At2g16600	CYP19-1	Peptidyl-prolyl cis-trans isomerase CYP19-1
At2g21130	CYP19-2	Peptidyl-prolyl cis-trans isomerase CYP19-2
At2g38730	CYP22	Peptidyl-prolyl cis-trans isomerase CYP22
At3g44600	CYP71	Peptidyl-prolyl cis-trans isomerase CYP71
At4g19830	FKBP17-1	Peptidyl-prolyl cis-trans isomerase FKBP17-1, chloroplastic
At3g49110	PER33	Peroxidase 33
At3g26060	PRXQ	Peroxiredoxin Q, chloroplastic
At3g06050	PRXIIF	Peroxiredoxin-2F, mitochondrial
At1g54340	ICDH	Peroxisomal isocitrate dehydrogenase [NADP]
At1g14510	AL7	PHD finger protein ALFIN-LIKE 7
At4g39280	At4g39280	Phenylalanine--tRNA ligase alpha subunit, cytoplasmic
At3g58140	At3g58140	Phenylalanine--tRNA ligase, chloroplastic/mitochondrial
At4g39230	PCBER1	Phenylcoumaran benzylic ether reductase 1
At3g09560	PAH1	Phosphatidate phosphatase PAH1
At4g25970	PSD3	Phosphatidylserine decarboxylase proenzyme 3
At5g18070	DRT101	Phosphoacetylglucosamine mutase
At2g43180	At2g43180	Phosphoenolpyruvate carboxylase family protein
At5g51820	PGMP	Phosphoglucomutase, chloroplastic
At5g17530	At5g17530	Phosphoglucosamine mutase family protein
At1g56190	At1g56190	Phosphoglycerate kinase 2, chloroplastic
At5g62840	MQB2.16	Phosphoglycerate mutase family protein
At3g60440	At3g60440	Phosphoglycerate mutase family protein
At1g58280	At1g58280	Phosphoglycerate mutase-like protein 2
At5g22620	MDJ22.4	Phosphoglycerate/bisphosphoglycerate mutase family protein
At1g09830	PUR2	Phosphoribosylamine--glycine ligase, chloroplastic
At2g37690	At2g37690	Phosphoribosylaminoimidazole carboxylase like protein
At1g31220	PUR3	Phosphoribosylglycinamide formyltransferase, chloroplastic
At4g39710	PNSL4	Photosynthetic NDH subunit of lumenal location 4, chloroplastic
At3g45780	PHOT1	Phototropin-1
At3g09150	HY2	Phytochromobilin:ferredoxin oxidoreductase, chloroplastic
At3g04780	At3g04780	PITH domain-containing protein At3g04780
At2g01650	PUX2	Plant UBX domain-containing protein 2
At1g14570	PUX7	Plant UBX domain-containing protein 7
At1g27020	At1g27020	Plant/protein
At3g23400	FIB4	Plastid-lipid associated protein PAP / fibrillin family protein
At1g20340	DRT112	Plastocyanin major isoform, chloroplastic
At4g01883	At4g01883	Polyketide cyclase / dehydrase and lipid transport protein
At3g15840	PIFI	Post-illumination chlorophyll fluorescence increase
At3g50210	At3g50210	Probable 2-oxoglutarate-dependent dioxygenase At3g50210
At4g20930	At4g20930	Probable 3-hydroxyisobutyrate dehydrogenase, mitochondrial
At1g20560	AAE1	Probable acyl-activating enzyme 1, peroxisomal
At4g15940	FAHD1	Probable acylpyruvase FAHD1, mitochondrial
At5g46750	AGD9	Probable ADP-ribosylation factor GTPase-activating protein AGD9
At1g60710	At1g60710	Probable aldo-keto reductase 4
At1g49650	CXE4	Probable carboxylesterase 4, mitochondrial
At5g10540	CYOP	Probable cytosolic oligopeptidase A
At4g37470	KAI2	Probable esterase KAI2
At2g26830	EMB1187	Probable ethanolamine kinase
At2g47390	GEP	Probable glutamyl endopeptidase, chloroplastic
At2g26730	At2g26730	Probable inactive receptor kinase At2g26730
At3g02880	At3g02880	Probable inactive receptor kinase At3g02880
At5g16590	At5g16590	Probable inactive receptor kinase At5g16590
At1g29720	RFK1	Probable LRR receptor-like serine/threonine-protein kinase At1g29720
At2g19940	At2g19940	Probable N-acetyl-gamma-glutamyl-phosphate reductase, chloroplastic
At1g60420	At1g60420	Probable nucleoredoxin 1
At1g23190	At1g23190	Probable phosphoglucomutase, cytoplasmic 1
At1g70730	At1g70730	Probable phosphoglucomutase, cytoplasmic 2
At3g62310	At3g62310	Probable pre-mRNA-splicing factor ATP-dependent RNA helicase DEAH2
At3g22480	At3g22480	Probable prefoldin subunit 2
At2g30170	At2g30170	Probable protein phosphatase 2C 26
At3g15260	At3g15260	Probable protein phosphatase 2C 39
At5g63990	SAL3	Probable SAL3 phosphatase
At5g15400	PUB1	Probable ubiquitin conjugation factor E4
At2g19760	PRF1	Profilin-1
At4g29350	PRF2	Profilin-2
At2g29570	PCNA2	Proliferating cell nuclear antigen 2
At2g14260	PIP	Proline iminopeptidase
At5g52520	OVA6	Proline--tRNA ligase, chloroplastic/mitochondrial
At1g76140	At1g76140	Prolyl oligopeptidase family protein
At3g28950	AIG2C	Protein AIG2 C
At3g28700	At3g28700	Protein arginine methyltransferase NDUFAF7
At4g31120	PMRT15	Protein arginine N-methyltransferase 1.5
At2g47470	PDIL2-1	Protein disulfide-isomerase like 2-1
At1g53280	DJ1B	Protein DJ-1 homolog B
At4g24510	CER2	Protein ECERIFERUM 2
At5g17020	XPO1	Protein EXPORTIN 1A
At1g07090	LSH6	Protein LIGHT-DEPENDENT SHORT HYPOCOTYLS 6
At4g16440	NAR1	Protein NAR1
At3g54360	NCA1	Protein NCA1
At2g17250	NOC4	Protein NUCLEOLAR COMPLEX ASSOCIATED 4
At1g07200	SMXL6	Protein SMAX1-LIKE 6
At1g15750	TPL	Protein TOPLESS
At1g05520	At1g05520	Protein transport protein SEC23
At3g07100	At3g07100	Protein transport protein Sec24-like At3g07100
At3g44340	CEF	Protein transport protein Sec24-like CEF
At3g63460	SEC31B	Protein transport protein SEC31 homolog B
At2g35880	WDL4	Protein WVD2-like 4
At4g27740	At4g27740	Protein yippee-like At4g27740
At1g71860	PTP1	Protein-tyrosine-phosphatase PTP1
At1g77090	PPD4	PsbP domain-containing protein 4, chloroplastic
At3g02770	At3g02770	Putative 4-hydroxy-4-methyl-2-oxoglutarate aldolase 1
At1g67980	At1g67980	Putative caffeoyl-CoA O-methyltransferase At1g67980
At2g25430	At2g25430	Putative clathrin assembly protein At2g25430
At4g23170	CRK9	Putative cysteine-rich receptor-like protein kinase 9
At4g08350	At4g08350	Putative transcription elongation factor SPT5 homolog 1
At1g61940	TULP4	Putative Tubby-like protein 4
At2g46580	PPOX2	Pyridoxine/pyridoxamine 5'-phosphate oxidase 2
At1g76550	PFP-ALPHA2	Pyrophosphate--fructose 6-phosphate 1-phosphotransferase subunit alpha 2
At1g12000	PFP-BETA1	Pyrophosphate--fructose 6-phosphate 1-phosphotransferase subunit beta 1
At1g59900	E1 ALPHA	Pyruvate dehydrogenase E1 component subunit alpha-1, mitochondrial
At1g24180	IAR4	Pyruvate dehydrogenase E1 component subunit alpha-2, mitochondrial
At5g50850	PDH2	Pyruvate dehydrogenase E1 component subunit beta-1, mitochondrial
At4g18253	At4g18253	Receptor Serine/Threonine kinase-like protein
At4g37000	RCCR	Red chlorophyll catabolite reductase, chloroplastic
At1g17160	RBSK	Ribokinase
At1g14210	At1g14210	Ribonuclease T2 family protein
At2g07732	At2g07732	Ribulose bisphosphate carboxylase large chain, catalytic domain-containing protein
At5g38410	RBCS3B	Ribulose bisphosphate carboxylase small chain
At1g67090	RBCS-1A	Ribulose bisphosphate carboxylase small chain 1A, chloroplastic
At1g19130	At1g19130	RmlC-like jelly roll fold protein
At4g20520	At4g20520	RNA binding / RNA-directed DNA polymerase
At1g78260	At1g78260;At1g22330	RNA-binding (RRM/RBD/RNP motifs) family protein
At5g44600	At5g44600	S-adenosyl-L-methionine-dependent methyltransferases superfamily protein
At3g21950	At3g21950	S-adenosyl-L-methionine-dependent methyltransferases superfamily protein
At5g63980	SAL1	SAL1 phosphatase
At5g14930	SAG101	Senescence-associated carboxylesterase 101
At4g30610	SCPL24	Serine carboxypeptidase 24
At3g07990	SCPL27	Serine carboxypeptidase-like 27
At5g08260	SCPL35	Serine carboxypeptidase-like 35
At1g15000	SCPL50	Serine carboxypeptidase-like 50
At4g13930	SHM4	Serine hydroxymethyltransferase 4
At2g13360	AGT1	Serine--glyoxylate aminotransferase
At5g28850	B''BETA	Serine/threonine protein phosphatase 2A regulatory subunit B''beta
At1g60940	SRK2B	Serine/threonine-protein kinase SRK2B
At1g78290	SRK2C	Serine/threonine-protein kinase SRK2C
At2g17700	STY8	Serine/threonine-protein kinase STY8
At1g13320	PP2AA3	Serine/threonine-protein phosphatase 2A 65 kDa regulatory subunit A gamma isoform
At4g03080	BSL1	Serine/threonine-protein phosphatase BSL1
At3g49100	SRP9	Signal recognition particle 9 kDa protein
At1g24190	SNL3	SIN3-like 3
At1g50170	SIRB	Sirohydrochlorin ferrochelatase B
At2g47980	SCC3	Sister-chromatid cohesion protein 3
At1g30470	At1g30470	SIT4 phosphatase-associated family protein
At1g75950	SKP1A	SKP1-like protein 1A
At1g41830	SKS6	SKU5-similar 6
At4g26840	SUMO1	Small ubiquitin-related modifier 1
At5g58440	SNX2A	Sorting nexin 2A
At1g11720	SS3	Starch synthase 3
At5g22580	At5g22580	Stress-response A/B barrel domain-containing protein At5g22580
At1g51360	DABB1	Stress-response A/B barrel domain-containing protein DABB1
At2g31670	UP3	Stress-response A/B barrel domain-containing protein UP3
At3g03990	D14	Strigolactone esterase D14
At1g01900	SBTI1.1	Subtilisin-like protease SBT1.1
At4g21650	SBT3.13	Subtilisin-like protease SBT3.13
At5g23250	At5g23250	Succinate--CoA ligase [ADP-forming] subunit alpha-2, mitochondrial
At2g20420	At2g20420	Succinate--CoA ligase [ADP-forming] subunit beta, mitochondrial
At1g79440	ALDH5F1	Succinate-semialdehyde dehydrogenase, mitochondrial
At5g20280	SPS1	Sucrose-phosphate synthase 1
At2g21470	SAE2	SUMO-activating enzyme subunit 2
At3g57870	SCE1	SUMO-conjugating enzyme SCE1
At2g28190	CSD2	Superoxide dismutase [Cu-Zn] 2, chloroplastic
At5g20190	At5g20190	Tetratricopeptide repeat (TPR)-like superfamily protein
At2g35010	At2g35010	Thioredoxin O1, mitochondrial
At1g11530	CXXS1	Thioredoxin-like protein CXXS1
At4g29840	TS1	Threonine synthase 1, chloroplastic
At1g72810	TS2	Threonine synthase 2, chloroplastic
At4g24930	At4g24930	Thylakoid lumenal 17.9 kDa protein, chloroplastic
At3g22380	TIC	Time for coffee
At1g32520	At1g32520	TLDc domain protein
At4g00780	A_TM018A10.12	TRAF-like family protein
At1g51160	F11M15.2	Trafficking protein particle complex subunit
At5g54750	MBG8.1	Trafficking protein particle complex subunit
At2g37160	At2g37160	Transducin/WD40 repeat-like superfamily protein
At5g49980	At5g49980	Transport inhibitor response 1-like protein
At3g05000	At3g05000	Transport protein particle (TRAPP) component
At2g16950	TRN1	Transportin-1
At2g21170	TIM	Triosephosphate isomerase, chloroplastic
At2g11890	TTM3	Triphosphate tunnel metalloenzyme 3
At1g64740	TUBA1	Tubulin alpha-1 chain
At1g50010	TUBA2	Tubulin alpha-2 chain
At5g19780	TUBA5	Tubulin alpha-5 chain
At4g14960	TUBA6	Tubulin alpha-6 chain
At5g62690	TUBB2	Tubulin beta-2 chain
At5g44340	TUBB4	Tubulin beta-4 chain
At1g20010	TUBB5	Tubulin beta-5 chain
At5g12250	TUBB6	Tubulin beta-6 chain
At5g23860	TUBB8	Tubulin beta-8 chain
At4g20890	TUBB9	Tubulin beta-9 chain
At3g10220	TFCB	Tubulin-folding cofactor B
At5g27650	At5g27650	Tudor/PWWP/MBT superfamily protein
At4g17510	UCH3	Ubiquitin carboxyl-terminal hydrolase 3
At2g30110	UBA1	Ubiquitin-activating enzyme E1 1
At1g14400	UBC1	Ubiquitin-conjugating enzyme E2 1
At3g46460	UBC13	Ubiquitin-conjugating enzyme E2 13
At2g02760	UBC2	Ubiquitin-conjugating enzyme E2 2
At5g50870	UBC27	Ubiquitin-conjugating enzyme E2 27
At1g16890	UBC36	Ubiquitin-conjugating enzyme E2 36
At5g59300	UBC7	Ubiquitin-conjugating enzyme E2 7
At1g27530	At1g27530	Ubiquitin-fold modifier-conjugating enzyme 1
At4g23920	UGE2	UDP-glucose 4-epimerase 2
At1g64440	UGE4	UDP-glucose 4-epimerase 4
At3g46440	UXS5	UDP-glucuronic acid decarboxylase 5
At5g05870	UGT76C1	UDP-glycosyltransferase 76C1
At5g05890	UGT76C5	UDP-glycosyltransferase 76C5
At1g22360	UGT85A2	UDP-glycosyltransferase 85A2
At2g35020	GLCNAC1PUT2	UDP-N-acetylglucosamine diphosphorylase 2
At5g52560	USP	UDP-sugar pyrophosphorylase
At3g07460	At3g07460	Uncharacterized protein
At4g16060	At4g16060	Uncharacterized protein
At2g01755	At2g01755	Uncharacterized protein
At1g03900	At1g03900	Uncharacterized protein At1g03900
At2g38790	At2g38790	Uncharacterized protein At2g38790
At4g15545	At4g15545	Uncharacterized protein At4g15545
At5g02240	At5g02240	Uncharacterized protein At5g02240
At1g16820	At1g16820	Vacuolar ATP synthase catalytic subunit-related / V-ATPase-related / vacuolar proton pump-like protein
At1g15130	BRO1	Vacuolar-sorting protein BRO1
At1g14610	TWN2	Valine--tRNA ligase, mitochondrial 1
At2g41740	VLN2	Villin-2
At2g16780	MSI2	WD-40 repeat-containing protein MSI2
At5g16730	At5g16730	WEB family protein At5g16730, chloroplastic
At2g04880	WRKY1	WRKY transcription factor 1
At1g52340	ABA2	Xanthoxin dehydrogenase
At2g06850	XTH4	Xyloglucan endotransglucosylase/hydrolase protein 4
At3g55020	At3g55020	Ypt/Rab-GAP domain of gyp1p superfamily protein
At2g47850	At2g47850	Zinc finger CCCH domain-containing protein 32
At5g56900	At5g56900	Zinc finger CCCH domain-containing protein 64
At5g23110	MYJ24.15	Zinc finger, C3HC4 type (RING finger) family protein
