# Supplementary material for: Proteome Dynamics of Persulfidation in Leaf Tissue under Light/Dark Conditions and Carbon Deprivation
Source: Antioxidants (Basel). 2023 Mar 23;12(4):789. doi: 10.3390/antiox12040789 (PMC10135009; doi:10.3390/antiox12040789)
Supplement: Supplementary file 1 [file antioxidants-12-00789-s001.zip › Table S1.pdf]

Table S1. Identified proteins in Cluster D1 related with the GO\_BF term, protein folding.

| AGI_ID    | Gene name                                               |
|-----------|---------------------------------------------------------|
| AT3G60740 | ARM repeat superfamily protein (TTN1)                   |
| AT2G04030 | Chaperone protein htpG family protein (CR88)            |
| AT2G22360 | DNAJ heat shock family protein                          |
| AT3G62600 | DNAJ heat shock family protein (ATERDJ3B)               |
| AT3G09440 | Heat shock protein 70 (Hsp 70) family protein           |
| AT5G42020 | Heat shock protein 70 (Hsp 70) family protein (BIP2)    |
| AT1G09080 | Heat shock protein 70 (Hsp 70) family protein (BIP3)    |
| AT5G02490 | Heat shock protein 70 (Hsp 70) family protein (Hsp70-2) |
| AT3G20050 | T-complex protein 1 alpha subunit (TCP-1)               |
| AT1G24510 | TCP-1/cpn60 chaperonin family protein                   |
| AT3G02530 | TCP-1/cpn60 chaperonin family protein                   |
| AT3G03960 | TCP-1/cpn60 chaperonin family protein                   |
| AT3G11830 | TCP-1/cpn60 chaperonin family protein                   |
| AT3G18190 | TCP-1/cpn60 chaperonin family protein                   |
| AT5G20890 | TCP-1/cpn60 chaperonin family protein                   |
| AT5G26360 | TCP-1/cpn60 chaperonin family protein                   |
| AT1G56340 | Calreticulin 1a (CRT1a)                                 |
| AT1G09210 | Calreticulin 1b (CRT1b)                                 |
| AT1G08450 | Calreticulin 3 (CRT3)                                   |
| AT1G55490 | Chaperonin 60 beta CPN60B)                              |
| AT2G44650 | Chloroplast chaperonin 10(CHL-CPN10)                    |
| AT4G24280 | Chloroplast heat shock protein 70-1(cpHsc70-1)          |
| AT5G49910 | Chloroplast heat shock protein 70-2(cpHsc70-2)          |
| AT5G48030 | gametophytic factor 2 (GFA2)                            |
| AT5G02500 | Heat shock cognate protein 70-1(HSC70-1)                |
| AT5G28540 | Heat shock protein 70 (Hsp 70) family protein (BIP1)    |
| AT1G79930 | Heat shock protein 91 (HSP91)                           |
| AT4G37910 | mitochondrial heat shock protein 70-1 (mtHsc70-1)       |
| AT5G58710 | rotamase CYP 7 (ROC7)                                   |
| AT5G39950 | Thioredoxin 2 (TRX2)                                    |
| AT5G16400 | Thioredoxin F2 TRXF2)                                   |
| AT1G45145 | Thioredoxin H-type 5 (TRX5)                             |
| AT2G47470 | Thioredoxin family protein (UNE5)                       |
| AT4G03520 | Thioredoxin superfamily protein (ATHM2)                 |
| AT1G77510 | PDI-like 1-2 (PDIL1-2)                                  |
