# Supplementary material for: Proteome Dynamics of Persulfidation in Leaf Tissue under Light/Dark Conditions and Carbon Deprivation
Source: Antioxidants (Basel). 2023 Mar 23;12(4):789. doi: 10.3390/antiox12040789 (PMC10135009; doi:10.3390/antiox12040789)
Supplement: Supplementary file 1 [file antioxidants-12-00789-s001.zip › Table S2.pdf]

Table S2. Identified proteins in cluster D2 related with Carbon Metabolism.

| AGI_ID                           | Gene name                                                              |
|----------------------------------|------------------------------------------------------------------------|
| <b>Carbon metabolism</b>         |                                                                        |
| AT3G55410                        | 2-oxoglutarate dehydrogenase, E1 component                             |
| AT1G12230                        | Aldolase superfamily protein                                           |
| AT1G65930                        | cICDH; cytosolic NADP <sup>+</sup> -dependent isocitrate dehydrogenase |
| AT1G34430                        | EMB3003; 2-oxoacid dehydrogenases acyltransferase family protein       |
| AT1G43670                        | FBP; Inositol monophosphatase family protein                           |
| AT1G23310                        | GGT1; glutamate:glyoxylate aminotransferase                            |
| AT1G09780                        | iPGAM1; Phosphoglycerate mutase, 2,3-bisphosphoglycerate-independent   |
| AT3G25860                        | LTA2; 2-oxoacid dehydrogenases acyltransferase family protein          |
| AT1G48030                        | mtLPD1; mitochondrial lipoamide dehydrogenase 1                        |
| AT1G01090                        | PDH-E1_ALPHA; pyruvate dehydrogenase E1 alpha                          |
| ATCG00490                        | RBCL; ribulose biphosphate carboxylase larga chain                     |
| AT1G67090                        | RBCS1A; ribulose biphosphate carboxylase small chain 1A                |
| AT5G38430                        | RBCS1B; Ribulose biphosphate carboxylase (small chain) family protein  |
| AT5G38410                        | RBCS3B; Ribulose biphosphate carboxylase (small chain) family protein  |
| AT5G66760                        | SDH1-1; succinate dehydrogenase 1-1                                    |
| AT3G27380                        | SDH2-1; succinate dehydrogenase 2-1                                    |
| AT4G37930                        | SHM1; serine transhydroxymethyltransferase 1                           |
| AT4G13930                        | SHM4; serine hydroxymethyltransferase 4                                |
| AT3G60750                        | Transketolase                                                          |
| <b>TCA cycle</b>                 |                                                                        |
| AT3G55410                        | 2-oxoglutarate dehydrogenase, E1 component                             |
| AT1G65930                        | cICDH; cytosolic NADP <sup>+</sup> -dependent isocitrate dehydrogenase |
| AT1G34430                        | EMB3003; 2-oxoacid dehydrogenases acyltransferase family protein       |
| AT3G25860                        | LTA2; 2-oxoacid dehydrogenases acyltransferase family protein          |
| AT1G48030                        | mtLPD1; mitochondrial lipoamide dehydrogenase 1                        |
| AT1G01090                        | PDH-E1_ALPHA; pyruvate dehydrogenase E1 alpha                          |
| AT5G66760                        | SDH1-1; succinate dehydrogenase 1-1                                    |
| AT3G27380                        | SDH2-1; succinate dehydrogenase 2-1                                    |
| <b>Glycolysis</b>                |                                                                        |
| AT1G34430                        | 2-oxoacid dehydrogenases acyltransferase family protein                |
| AT1G43670                        | FBP; Inositol monophosphatase family protein                           |
| AT3G47800                        | Galactose mutarotase-like superfamily protein                          |
| AT1G09780                        | iPGAM1; Phosphoglycerate mutase, 2,3-bisphosphoglycerate-independent   |
| AT3G25860                        | LTA2; 2-oxoacid dehydrogenases acyltransferase family protein          |
| AT1G48030                        | mtLPD1; mitochondrial lipoamide dehydrogenase 1                        |
| AT5G54960                        | PDC2; pyruvate decarboxylase-2                                         |
| AT1G01090                        | PDH-E1_ALPHA; pyruvate dehydrogenase E1 alpha                          |
| <b>Oxidative phosphorylation</b> |                                                                        |
| AT5G08680                        | ATP synthase alpha/beta family protein      nit (DET3)                 |
| AT1G51650                        | ATP synthase epsilon chain                                             |
| AT2G33040                        | ATP3; gamma subunit of Mt ATP synthase                                 |
| AT5G47030                        | ATPase, F1 complex, delta/epsilon subunit                              |
| AT4G09650                        | ATPD; F-type H <sup>+</sup> -transporting ATPase subunit delta         |
| AT1G12840                        | DET3; vacuolar ATP synthase subunit C (VATC)                           |
| AT5G66760                        | SDH1-1; succinate dehydrogenase 1-1                                    |
| AT3G27380                        | SDH2-1; succinate dehydrogenase 2-1                                    |
| AT1G76030                        | VAB1; ATPase, V1 complex, subunit B protein                            |
| AT4G38510                        | VAB2; ATPase, V1 complex, subunit B protein                            |
| AT1G78900                        | VHA-A; vacuolar ATP synthase subunit A                                 |
