# Supplementary material for: Proteome Dynamics of Persulfidation in Leaf Tissue under Light/Dark Conditions and Carbon Deprivation
Source: Antioxidants (Basel). 2023 Mar 23;12(4):789. doi: 10.3390/antiox12040789 (PMC10135009; doi:10.3390/antiox12040789)
Supplement: Supplementary file 1 [file antioxidants-12-00789-s001.zip › Table S3.pdf]

Table S3. Identified proteins in light clusters according to GO\_BF and KEGG classifications.

| AGI_ID                        | Gene name                                               |
|-------------------------------|---------------------------------------------------------|
| <b>Proteosome</b>             |                                                         |
| AT3G22110                     | 20S proteasome alpha subunit C1 (PAC1)                  |
| AT1G53850                     | 20S proteasome alpha subunit E1 (PAE1)                  |
| AT2G27020                     | 20S proteasome alpha subunit G1 (PAG1)                  |
| AT3G51260                     | 20S proteasome alpha subunit PAD1 (PAD1)                |
| AT3G22630                     | 20S proteasome beta subunit D1 (PBD1)                   |
| AT4G14800                     | 20S proteasome beta subunit D2 (PBD2)                   |
| AT1G13060                     | 20S proteasome beta subunit E1 (PBE1)                   |
| AT1G56450                     | 20S proteasome beta subunit G1 (PBG1)                   |
| AT2G05840                     | 20S proteasome subunit PAA2 (PAA2)                      |
| AT1G45000                     | AAA-type ATPase family protein                          |
| AT3G26340                     | N-terminal nucleophile aminohydrolases                  |
| AT4G31300                     | N-terminal nucleophile aminohydrolases                  |
| AT3G27430                     | N-terminal nucleophile aminohydrolases                  |
| AT3G60820                     | N-terminal nucleophile aminohydrolases                  |
| AT5G35590                     | proteasome alpha subunit A1 (PAA1)                      |
| AT5G66140                     | proteasome alpha subunit D2 (PAD2)                      |
| AT5G42790                     | proteasome alpha subunit F1 (PAF1)                      |
| AT1G21720                     | proteasome beta subunit C1 (PBC1)                       |
| AT3G53970                     | proteasome inhibitor-like protein                       |
| AT1G16470                     | proteasome subunit PAB1 (PAB1)                          |
| <b>Glutathione metabolism</b> |                                                         |
| AT1G64190                     | 6-phosphogluconate dehydrogenase family protein         |
| AT3G02360                     | 6-phosphogluconate dehydrogenase family protein         |
| AT5G41670                     | 6-phosphogluconate dehydrogenase family protein         |
| AT1G44790                     | ChaC-like family protein                                |
| AT2G24200                     | Cytosol aminopeptidase family protein (LAP1)            |
| AT4G30920                     | Cytosol aminopeptidase family protein (LAP2)            |
| AT5G02790                     | Glutathione S-transferase family protein (GSTL3)        |
| AT5G14590                     | Isocitrate/isopropylmalate dehydrogenase family protein |
| AT1G63770                     | Peptidase M1 family protein                             |
| AT4G32320                     | ascorbate peroxidase 6 (APX6)                           |
| AT1G75270                     | dehydroascorbate reductase 2 (DHAR2)                    |
| AT1G19570                     | dehydroascorbate reductase (DHAR1)                      |
| AT3G27300                     | glucose-6-phosphate dehydrogenase 5 (G6PD5)             |
| AT4G23100                     | glutamate-cysteine ligase (GSH1)                        |
| AT4G02520                     | glutathione S-transferase PHI 2 (GSTF2)                 |
| AT1G59700                     | glutathione S-transferase TAU 16 (GSTU16)               |
| AT1G10360                     | glutathione S-transferase TAU 18 (GSTU18)               |
| AT1G78380                     | glutathione S-transferase TAU 19 (GSTU19)               |
| AT1G78340                     | glutathione S-transferase TAU 22 (GSTU22)               |
| AT1G17170                     | glutathione S-transferase TAU 24 (GSTU24)               |
| AT5G17220                     | glutathione S-transferase PHI 12 (GSTF12)               |
| AT1G27130                     | glutathione S-transferase TAU 13 (GSTU13)               |
| AT3G43800                     | glutathione S-transferase TAU 27 (GSTU27)               |
| AT2G29470                     | glutathione S-transferase TAU 3 (GSTU3)                 |
| AT2G25080                     | glutathione peroxidase 1 (GPX1)                         |
| AT2G31570                     | glutathione peroxidase 2 (GPX2)                         |
| AT4G11600                     | glutathione peroxidase 6 (GPX6)                         |
| AT4G31870                     | glutathione peroxidase 7 (GPX7)                         |
| AT1G63460                     | glutathione peroxidase 8 (GPX8)                         |
| AT5G27380                     | glutathione synthetase 2 (GSH2)                         |

AT3G55040 glutathione transferase lambda 2 (GSTL2)  
AT1G70310 spermidine synthase 2 (SPDS2)  
AT5G53120 spermidine synthase 3 (SPDS3)  
AT1G23820 spermidine synthase 1 (SPDS1)

#### Nucleosome assembly

AT2G28720 Histone superfamily protein  
AT5G59910 Histone superfamily protein (HTB4)  
AT3G45980 Histone superfamily protein (HTB9)  
AT1G74560 NAP1-related protein 1 (NRP1)  
AT1G18800 NAP1-related protein 2 (NRP2)  
AT5G22880 histone B2 (HTB2)  
AT2G19480 nucleosome assembly protein 1;2 (NAP1;2)  
AT5G56950 nucleosome assembly protein 1;3 (NAP1;3)  
AT4G26110 nucleosome assembly protein1;1 (NAP1;1)  
AT1G06760 winged-helix DNA-binding transcription factor family protein

#### Glycolysis

AT2G24270 aldehyde dehydrogenase 11A3 (ALDH11A3)  
AT1G54100 aldehyde dehydrogenase 7B4(ALDH7B4)  
AT5G03690 Aldolase superfamily protein (FBA4)  
AT2G36460 Aldolase superfamily protein (FBA6)  
AT2G01140 Aldolase superfamily protein (PDE345)  
AT1G74030 Enolase 1 (ENO1)  
AT2G36530 Enolase 2 (LOS2)  
AT3G04120 glyceraldehyde-3-phosphate dehydrogenase C subunit 1 (GAPC1)  
AT5G24760 GroES-like zinc-binding dehydrogenase family protein  
AT5G61580 phosphofructokinase 4(PFK4)  
AT1G12000 Phosphofructokinase family protein  
AT1G20950 Phosphofructokinase family protein  
AT1G76550 Phosphofructokinase family protein  
AT5G51820 phosphoglucomutase (PGM)  
AT1G70730 Phosphoglucomutase/phosphomannomutase family protein (PGM2)  
AT1G23190 Phosphoglucomutase/phosphomannomutase family protein (PGM3)  
At3g50520 Phosphoglycerate mutase family protein  
AT1G59900 pyruvate dehydrogenase complex E1 alpha subunit (E1 ALPHA)  
AT3G52990 Pyruvate kinase family protein  
AT5G42740 Sugar isomerase (SIS) family protein

---
